# Supplementary material for: Sexual dimorphic regulation of recombination by the synaptonemal complex in C. elegans
Source: eLife. 2023 Oct 5;12:e84538. doi: 10.7554/eLife.84538 (PMC10611432; doi:10.7554/eLife.84538)
Supplement: Figure 1—figure supplement 3—source data 1. [file elife-84538-fig1-figsupp3-data1.xlsx]

## Sheet: Sheet1
early pachytene (oocytes	mid pachytene (oocytes)	late pachytene (oocytes)		early pachytene (sperm)	mid pachytene (sperm)	late pachytene (sperm)
5.97207	7.42139	5.64722		4.44039	5.77448	5.96571
5.36167	7.64546	5.07424		4.70945	6.12724	4.63139
5.41099	6.08225	6.0643		2.38612	5.04504	5.17609
4.59304	6.39652	4.63138		4.15121	5.69163	4.61137
4.24884	4.23948	5.95619		1.03053	6.082	4.29213
3.04814	5.34582	3.68671		4.22805	5.91771	5.20802
4.36714	6.66472	5.15198		3.82227	5.00932	5.94379
4.68939	4.49019	5.5581		5.04063	5.80007	5.2965
6.36854	6.50234	7.50708		5.45607	4.08302	5.86272
3.57743	5.89101	5.61437		4.43056	5.68852	4.2322
4.71892	5.31632	4.15121		3.56271	5.70643	4.69889
3.29686	5.95737	4.40418		4.01433	5.0051	4.75095
4.05978	5.77068	8.03516		3.03835	5.8267	4.34443
3.815	5.17193	7.33219		1.76737	6.3652	4.14774
4.36749	5.05931	5.21926		3.07086	6.37953	4.34482
5.4292	4.90121	5.02052		4.36865	4.3913	3.90518
4.74663	4.493	6.79464		5.7352	5.82542	3.51274
2.84797	2.67202	6.81235		1.4664	5.46199	6.1339
6.54155	5.35109	4.50063		5.92769	5.00945	4.50347
3.89211	6.56907	7.3719		5.10186	6.42905	3.33485
3.5089	6.0975	6.35425		4.02026	6.04653	5.40726
4.0442	3.55354	7.36076		4.12204	6.10563	5.17225
1.84234	5.00357	6.44802		4.84629	5.04307	5.68017
1.97734	6.11555	5.25524		4.32269	6.49252	4.13148
3.98116	5.40245	6.59852		4.90062	6.55013	4.84111
3.73738	4.94545	5.0332		3.56305	6.83484	4.28174
4.33018	4.00828	4.73661		3.84013	5.74986	6.27838
4.78009	6.68335	3.99496		4.89995	6.57242	3.78386
3.94833	7.23576	6.37789		1.45367	5.44591	4.72435
5.25556	6.20366	4.72178		1.85839	6.24463	5.30764
4.68396	7.00091	5.07226		3.90979	4.28914	4.07708
3.93649	5.62052	6.85481		4.00805	6.49389	4.43644
2.94011	4.02044	7.37082		4.04164	5.89424	5.67287
3.86161	6.14629	6.93		4.5079	5.12523	3.92892
4.82818	6.5943	5.03106		5.22017	4.90649	5.13464
5.14094	4.98953	5.76177		5.32913	6.7633	4.25472
4.28811	7.91483	6.27581		4.83922	6.27394	5.02277
4.5922	5.13309	5.53857		6.2132	6.73343	5.78639
5.22596	8.51861	5.15914		4.93307	5.8858	6.22481
3.65365	6.69341	5.81185		5.75349	3.00624	4.67149
3.32332	6.19359	4.60389		7.8157	5.84121	5.10804
2.24248	7.63797	5.89412		5.46276	4.73111	4.95817
2.1408	7.06278	5.3185		4.33006	6.14762	3.73112
2.06558	7.30873	5.26964		3.86643	5.86019	6.12957
2.3906	7.31284	5.63516		4.09259	4.60609	4.51516
2.17348	5.64043	6.11971		4.35974	4.08691	5.70329
1.37822	6.53685	5.90675		4.21747	5.27201	4.65182
4.20221	6.37516	6.69128		4.08519	3.98202	4.81405
4.25765	6.81587	7.10367		4.83544	3.03686	5.5731
4.75126	6.69197	5.04467		5.01904	4.74602	4.92434
2.9007	6.32043	6.39549		3.86362	7.28481	4.47154
4.68233	6.22034	5.72962		2.41898	6.04841	6.68206
4.46213	4.87943	5.45244		4.28823	5.77094	5.54119
2.3223	4.70608	5.33983		2.73045	6.5999	4.40871
3.76417	6.35689	6.66341		4.17832	6.60641	5.41015
5.08858	4.73041	5.15124			6.02826	6.18277
3.87943	7.8195	4.55904			5.38713	5.35834
5.6737	6.08166	5.90092			5.56204	5.41169
3.20899	6.78845	6.08323			5.82615	5.02765
	6.54287	5.66948			4.50333	4.7785
		4.91236				4.68944
		4.73902				5.12942
		6.62572				5.63066
		5.41661				5.20209
		6.38611				4.43896
		5.60234
		6.24807
		5.87887
		7.21899
		6.49224
		4.95488
		4.95799
