# Supplementary material for: Sexual dimorphic regulation of recombination by the synaptonemal complex in C. elegans
Source: eLife. 2023 Oct 5;12:e84538. doi: 10.7554/eLife.84538 (PMC10611432; doi:10.7554/eLife.84538)
Supplement: Figure 1—source data 1. [file elife-84538-fig1-data1.xlsx]

## Sheet: GFPSYP2 spermatocytes
	early pachytene										mid pachytene										late pachytene
pre-bleach	1	1	1	1	1	1	1	1	1		1	1	1	1	1	1	1	1	1		1	1	1	1	1	1	1	1	1	1
bleach	0	0	0	0	0	0	0	0	0		0	0	0	0	0	0	0	0	0		0	0	0	0	0	0	0	0	0	0
0	0.316117	-0.0410967	-0.0180828	0.000699761	0.0372244	0.0204348	0.111696	0.113818	0.139086		0.0688098	0.0971547	0.123506	0.0660628	0.00457868	0.0366485	0.114878	0.0945409	0.121628		0.1143	0.110986	0.108193	0.0719607	0.0218143	0.0321897	0.0585944	0.069954	0.0265091	0.069954
5	0.303901	0.305162	0.317583	0.17494	0.098924	0.123541	0.198251	0.118445	0.0957064		0.13752	0.18081	0.158067	0.148578	0.0630206	0.110603	0.196162	0.0882435	0.0629309		0.170384	0.235589	0.106978	0.0869251	0.094059	0.16441	0.114664	0.17066	0.144501	0.17066
10	0.341512	0.481599	0.0500958	0.326354	0.0773176	0.156237	0.279237	0.206116	0.230857		0.15552	0.215868	0.188211	0.154402	0.083136	0.1107	0.302042	0.185123	0.117707		0.175566	0.320182	0.13458	0.0896102	0.117694	0.213888	0.155989	0.226583	0.169934	0.226583
15	0.318593	0.473519	0.199325	0.326138	0.197307	0.186285	0.246169	0.204338	0.21927		0.298109	0.360159	0.279119	0.26851	0.0940426	0.18049	0.313703	0.147383	0.146091		0.248846	0.35558	0.148092	0.0978598	0.151866	0.198493	0.184282	0.193346	0.186194	0.193346
20	0.423262	0.486499	0.21576	0.444208	0.281081	0.231826	0.391427	0.28627	0.34191		0.334837	0.241361	0.295572	0.273608	0.116771	0.138524	0.316377	0.134251	0.165678		0.290101	0.353038	0.166219	0.130948	0.198108	0.190756	0.201131	0.214375	0.213801	0.214375
25	0.396953	0.502985	0.377526	0.454339	0.321465	0.288571	0.400253	0.287369	0.275435		0.428061	0.270771	0.424484	0.264315	0.12432	0.187629	0.327239	0.172853	0.152913		0.270544	0.358191	0.252419	0.134739	0.221784	0.286492	0.226918	0.254402	0.240863	0.254402
30	0.471082	0.48347	0.463284	0.455829	0.259427	0.305657	0.361351	0.326119	0.314008		0.374261	0.37287	0.404629	0.300624	0.215678	0.243895	0.329687	0.252235	0.17273		0.225867	0.472813	0.106848	0.154055	0.266181	0.309406	0.212701	0.161669	0.185437	0.161669
35	0.469898	0.574065	0.411534	0.594761	0.384743	0.398322	0.40836	0.300144	0.254509		0.412597	0.241736	0.423741	0.288545	0.232729	0.205799	0.357078	0.28698	0.184654		0.217937	0.476976	0.159122	0.153652	0.276138	0.30589	0.23547	0.206171	0.288051	0.206171
image name	2021_08_05_DLW118_FRAP_20C_EP_MP_LP_male1005	2021_08_05_DLW118_FRAP_20C_EP_MP_LP_male1005	SUM_2022_07_18_DLW118_FRAP_20C_EP_MP_LP_male1_004	2021_09_15_DLW118_FRAP_20C_EP_MP_LP_male2	2021_09_15_DLW118_FRAP_20C_EP_MP_LP_male2	2022_07_25_DLW118_FRAP_20C_EP_MP_LP_male1_004	SUM_2022_07_18_DLW118_FRAP_20C_EP_MP_LP_male1_004	SUM_2022_07_18_DLW118_FRAP_20C_EP_MP_LP_male1_004	SUM_2022_07_18_DLW118_FRAP_20C_EP_MP_LP_male1_004		2021_08_05_DLW118_FRAP_20C_EP_MP_LP_male1005	2021_08_05_DLW118_FRAP_20C_EP_MP_LP_male1005	2021_08_05_DLW118_FRAP_20C_EP_MP_LP_male1005	2021_09_15_DLW118_FRAP_20C_EP_MP_LP_male1	2021_09_15_DLW118_FRAP_20C_EP_MP_LP_male2	2021_09_15_DLW118_FRAP_20C_EP_MP_LP_male2	2022_07_25_DLW118_FRAP_20C_EP_MP_LP_male1_004				2021_08_05_DLW118_FRAP_20C_EP_MP_LP_male1005	2021_08_05_DLW118_FRAP_20C_EP_MP_LP_male1005	2021_08_05_DLW118_FRAP_20C_EP_MP_LP_male1005	SUM_2022_07_18_DLW118_FRAP_20C_EP_MP_LP_male1_004	2021_09_15_DLW118_FRAP_20C_EP_MP_LP_male1	2021_09_15_DLW118_FRAP_20C_EP_MP_LP_male1	2021_09_15_DLW118_FRAP_20C_EP_MP_LP_male1	2021_09_15_DLW118_FRAP_20C_EP_MP_LP_male2	2021_09_15_DLW118_FRAP_20C_EP_MP_LP_male2	2022_07_25_DLW118_FRAP_20C_EP_MP_LP_male1_004

## Sheet: GFPSYP2 oocytes 
	early pachytene											mid pachytene										late pachytene
pre-bleach	1	1	1	1	1	1	1	1	1	1		1	1	1	1	1	1	1	1	1		1	1	1	1	1	1	1	1	1
bleach	0	0	0	0	0	0	0	0	0	0		0	0	0	0	0	0	0	0	0		0	0	0	0	0	0	0	0	0
0	0.144999	0.121884	0.139157	0.160303	0.0407939	0.0428884	0.0407939	0.0428884	0.169875	0.159749		0.0290269	0.0291912	0.0379877	0.0475675	0.00372426	0.0356071	0.0314502	-0.0136713	0.0454418		0.0382266	0.0300973	0.0532446	0.070013	-0.013441	0.027624	0.00610003	0.0967944	0.0357502
5	0.200666	0.140906	0.162347	0.179772	0.0590897	0.0721373	0.0590897	0.0721373	0.155252	0.164292		0.0454235	0.0532902	0.0520881	0.0566919	0.0113961	0.0444915	0.0279003	0.0154079	0.0836069		0.054245	0.0389956	-0.00945169	0.0356306	0.0477615	0.0111444	0.0245417	0.159186	0.125937
10	0.232988	0.162034	0.194963	0.189273	0.0924068	0.0850175	0.0924068	0.0850175	0.195592	0.182539		0.0570558	0.0494346	0.0553217	0.0955173	0.0567164	0.0425896	0.0404738	0.0355936	0.102124		0.0958454	0.0848851	0.060087	-0.0193254	-0.0022198	0.0200477	0.0278511	0.148891	0.0982575
15	0.213931	0.169727	0.180036	0.176064	0.124621	0.0469572	0.124621	0.0469572	0.146523	0.253859		0.05172	0.0602697	0.0702538	0.116981	0.0674147	0.0482636	0.0350074	0.0823724	0.163452		0.0944328	0.0810018	0.056062	-0.0322059	0.0196146	0.0461871	0.0262099	0.171677	0.145107
20	0.250847	0.152034	0.159631	0.140413	0.124289	0.0829837	0.124289	0.0829837	0.110958	0.209451		0.0628935	0.0691305	0.0595958	0.0735197	0.139588	0.045346	0.0720182	0.0805193	0.135694		0.101037	0.0962409	0.044867	0.0869092	0.0473841	0.0164565	0.0404328	0.20276	0.202146
25	0.26455	0.155515	0.152683	0.163347	0.124053	0.100878	0.124053	0.100878	0.143642	0.181597		0.080961	0.0746952	0.0675829	0.0801323	0.100054	0.0468653	0.0708032	0.105654	0.14013		0.103835	0.0942093	0.0302087	0.0857482	0.0315521	-0.0235415	0.05434	0.196742	0.104826
30	0.248071	0.156237	0.121107	0.128303	0.136921	0.120098	0.136921	0.120098	0.161324	0.179832		0.0954797	0.0758953	0.0517924	0.115714	0.0961884	0.0964818	0.184884	0.122266	0.186196		0.103152	0.102113	0.00202457	0.0769625	0.00994002	-0.0251239	0.0400506	0.197122	0.195265
35	0.236686	0.161725	0.109747	0.131077	0.149008	0.140847	0.149008	0.140847	0.166789	0.191302		0.0755403	0.0931064	0.0487026	0.166505	0.197176	0.171857	0.153339	0.107659	0.228815		0.126953	0.0952957	0.0658061	0.0720625	0.00761494	-0.00082066	0.0863216	0.206039	0.00977388
40	0.251709	0.163333	0.120568	0.125774	0.150808	0.137478	0.150808	0.137478				0.0846532	0.111865	0.0560795	0.151064	0.173781	0.168715	0.195873				0.128337	0.0927196	0.0711055	0.0590382	0.0347516	0.00390028
image name	2021_09_07_DLW118_FRAP_20C_EP_MP_LP_herm1_005	2021_09_07_DLW118_FRAP_20C_EP_MP_LP_herm1_005	2021_09_07_DLW118_FRAP_20C_EP_MP_LP_herm1_005	2021_09_07_DLW118_FRAP_20C_EP_MP_LP_herm1_005	2021_09_14_DLW118_FRAP_20C_EP_MP_LP_herm1_004	2021_09_14_DLW118_FRAP_20C_EP_MP_LP_herm1_004	2021_09_14_DLW118_FRAP_20C_EP_MP_LP_herm1_008	2021_09_14_DLW118_FRAP_20C_EP_MP_LP_herm1_008	2022_05_07_DLW118_FRAP_20C_EP_MP_LP_herm1_004	2022_05_07_DLW118_FRAP_20C_EP_MP_LP_herm1_004		2021_09_07_DLW118_FRAP_20C_EP_MP_LP_herm1_005	2021_09_07_DLW118_FRAP_20C_EP_MP_LP_herm1_005	2021_09_07_DLW118_FRAP_20C_EP_MP_LP_herm1_005	2021_09_14_DLW118_FRAP_20C_EP_MP_LP_herm1_004	2021_09_14_DLW118_FRAP_20C_EP_MP_LP_herm1_004	2021_09_14_DLW118_FRAP_20C_EP_MP_LP_herm1_008	2021_09_14_DLW118_FRAP_20C_EP_MP_LP_herm1_008	2022_05_07_DLW118_FRAP_20C_EP_MP_LP_herm1_004	2022_05_07_DLW118_FRAP_20C_EP_MP_LP_herm3_004		2021_09_07_DLW118_FRAP_20C_EP_MP_LP_herm1_005	2021_09_07_DLW118_FRAP_20C_EP_MP_LP_herm1_005	2021_09_14_DLW118_FRAP_20C_EP_MP_LP_herm1_004	2021_09_14_DLW118_FRAP_20C_EP_MP_LP_herm1_004	2021_09_14_DLW118_FRAP_20C_EP_MP_LP_herm1_008	2021_09_14_DLW118_FRAP_20C_EP_MP_LP_herm1_008	2022_05_07_DLW118_FRAP_20C_EP_MP_LP_herm1_004	2022_05_07_DLW118_FRAP_20C_EP_MP_LP_herm2_004	2022_05_07_DLW118_FRAP_20C_EP_MP_LP_herm3_004

## Sheet: mCherrySYP3 spermatocytes
	early pachytene										mid pachytene										late pachytene
pre-bleach	1	1	1	1	1	1	1	1			1	1	1	1	1	1	1	1	1		1	1	1	1	1	1	1	1	1	1
bleach	0	0	0	0	0	0	0	0			0	0	0	0	0	0	0	0	0		0	0	0	0	0	0	0	0	0	0
0	-0.0176379	0.0731338	0.125095	-0.0147809	0.0536484	0.0451965	0.0340389	0.0864947			-0.192142	0.126494	0.0805559	0.112349	-0.00263882	0.312542	0.0629489	0.10334	0.0789974		0.0642169	0.3902	0.123141	0.519949	0.0741415	-0.00134855	0.414754	0.107977	0.0958254	0.0620836
5	-0.0669337	0.164198	0.178493	0.20938	0.0635209	0.217526	0.149109	0.183142			0.267785	0.238216	0.109183	0.104448	0.154274	0.0192374	0.181309	0.112953	0.184055		0.015198	0.422061	0.0956513	0.439905	0.0590411	0.0296904	0.417186	0.103683	0.147357	0.0674224
10	0.0464584	0.1927	0.194342	0.176874	0.0659043	0.0354667	-0.00857259	0.0672534			0.248117	0.215383	0.110247	0.199677	0.276593	0.170972	0.240481	0.182942	0.193958		0.0228936	0.383486	0.15372	0.423036	0.126832	0.0430425	0.37774	0.113641	0.164623	0.168693
15	0.048289	0.277885	0.267395	0.200782	0.145999	0.191834	0.064634	0.204792			0.280079	0.335545	0.221034	0.221599	0.21812	0.112306	0.257579	0.230457	0.270414		-0.0671237	0.351293	0.194439	0.38339	0.162909	0.0700796	0.387644	0.153295	0.213078	0.226644
20	0.0834995	0.260971	0.190061	0.224628	0.143812	0.253875	0.11099	0.227078			0.1945	0.365747	0.211635	0.346332	0.0280487	0.30425	0.249466	0.288719	0.251369		-0.055865	0.334145	0.189482	0.397313	0.141776	0.0656718	0.440721	0.108966	0.204947	0.189883
25	0.147811	0.404123	0.194687	0.269978	0.180461	0.243225	0.161324	0.177026			0.1909	0.45394	0.204129	0.228677	0.033695	0.293326	0.324827	0.286705	0.251715		-0.0207842	0.322295	0.205806	0.378192	0.139166	0.0549324	0.41456	0.174059	0.243638	0.173383
30	0.265531	0.432311	0.274565	0.319222	0.16538	0.0951	0.100564	0.141523			0.30565	0.405631	0.244619	0.241592	0.0566043	0.261839	0.340181	0.286597	0.277107		0.0321898	0.298182	0.167562	0.38763	0.176144	0.0761833	0.436213	0.171389	0.267898	0.216223
35	0.292571	0.420863	0.28688	0.229173	0.190039	0.259968	0.247396	0.249291			0.222133	0.471437	0.244974	0.360709	0.151174	0.287556	0.347714	0.272722	0.30891		0.0429872	0.286193	0.158657	0.358558	0.146267	0.0285435	0.434064	0.144042	0.293975	0.211014
image name	2022_07_20_DLW128_FRAP_20C_EP_MP_LP_male1_004	2022_07_22_DLW128_FRAP_20C_EP_MP_LP_male1_007	2022_07_22_DLW128_FRAP_20C_EP_MP_LP_male1_007	2022_07_22_DLW128_FRAP_20C_EP_MP_LP_male1_007	2022_07_23_DLW128_FRAP_20C_EP_MP_LP_male3_004.xlsx	2022_07_23_DLW128_FRAP_20C_EP_MP_LP_male4_004.xlsx	2022_07_23_DLW128_FRAP_20C_EP_MP_LP_male4_004.xlsx	2022_07_23_DLW128_FRAP_20C_EP_MP_LP_male4_004.xlsx			2022_07_20_DLW128_FRAP_20C_EP_MP_LP_male1_004	2022_07_20_DLW128_FRAP_20C_EP_MP_LP_male1_004	2022_07_20_DLW128_FRAP_20C_EP_MP_LP_male2_004	2022_07_20_DLW128_FRAP_20C_EP_MP_LP_male2_004	2022_07_20_DLW128_FRAP_20C_EP_MP_LP_male3_004	2022_07_22_DLW128_FRAP_20C_EP_MP_LP_male1_007	2022_07_23_DLW128_FRAP_20C_EP_MP_LP_male3_004.xlsx	2022_07_23_DLW128_FRAP_20C_EP_MP_LP_male3_004.xlsx	2022_07_23_DLW128_FRAP_20C_EP_MP_LP_male3_004.xlsx		2022_07_20_DLW128_FRAP_20C_EP_MP_LP_male1_004	2022_07_20_DLW128_FRAP_20C_EP_MP_LP_male1_004	2022_07_20_DLW128_FRAP_20C_EP_MP_LP_male2_004	2022_07_20_DLW128_FRAP_20C_EP_MP_LP_male2_004	2022_07_20_DLW128_FRAP_20C_EP_MP_LP_male2_004	2022_07_20_DLW128_FRAP_20C_EP_MP_LP_male3_004	2022_07_20_DLW128_FRAP_20C_EP_MP_LP_male3_004	2022_07_22_DLW128_FRAP_20C_EP_MP_LP_male1_007	2022_07_23_DLW128_FRAP_20C_EP_MP_LP_male3_004.xlsx	2022_07_23_DLW128_FRAP_20C_EP_MP_LP_male3_004.xlsx

## Sheet: mCherrySYP3 oocytes
	early pachytene											mid pachytene										late pachytene
pre-bleach	1	1	1	1	1	1	1	1	1	1	1	1	1	1	1	1	1	1	1	1		1	1	1	1	1	1	1	1	1
bleach	0	0	0	0	0	0	0	0	0	0	0	0	0	0	0	0	0	0	0	0		0	0	0	0	0	0	0	0	0
0	0.142962	0.355676	0.0625469	0.208405	0.250513	0.0495612	-0.0212762	0.385937	0.394656	0.291192	0.281147	0.0416899	0.0655066	0.145584	0.078201	0.0668768	0.146018	-0.00359978	0.0796288	0.0997406		0.0138598	0.165469	0.0395829	0.0835878	0.0160245	0.147902	0.0854089	0.116809	0.311107
5	0.286366	0.295298	0.131453	0.115922	0.363115	0.215987	0.29178	0.303302	0.458266	0.348854	0.282212	0.0958263	0.0867748	0.11869	0.138827	0.187655	0.29366	0.0201252	0.149721	0.218112		0.0636414	0.236767	0.0126961	0.0959292	0.0392992	0.178388	0.135627	0.187634	0.508389
10	0.32027	0.308538	0.233054	0.178844	0.441635	0.42979	0.415578	0.256739	0.477136	0.330525	0.277384	0.167414	0.108526	0.159818	0.170457	0.0688556	0.260143	0.282859	0.0912851	0.227084		0.0450654	0.280004	0.066222	0.162073	0.0329454	0.202502	0.300489	0.196436	0.31669
15	0.380798	0.338506	0.20564	0.350314	0.460903	0.471039	0.486874	0.345216	0.474338	0.36677	0.281695	0.0987907	0.104473	0.22781	0.428857	0.209049	0.194805	0.221123	0.13637	0.320649		0.0683977	0.232133	0.0719975	0.292801	-0.00552021	0.180775	0.241475	0.217233	0.328212
20	0.299424	0.357831	0.328913	0.439524	0.51746	0.51466	0.509652	0.351942	0.525477	0.479685	0.323025	0.181209	0.172804	0.234389	0.30129	0.259829	0.234102	0.194477	0.207752	0.369645		0.0818159	0.280593	0.0747695	0.330224	0.0402588	0.181393	0.21413	0.312332	0.414291
25	0.380156	0.352714	0.323785	0.619813	0.455379	0.548883	0.424475	0.334164	0.375955	0.448747	0.368137	0.178366	0.171167	0.196458	0.233946	0.281554	0.268146	0.324843	0.241575	0.36465		0.0598494	0.255479	0.084181	0.321527	0.00322034	0.242758	0.0501181	0.272329	0.326032
30	0.347297	0.256716	0.294644	0.623078	0.513228	0.548904	0.445445	0.408345	0.409996	0.532871	0.379221	0.231564	0.195601	0.283756	0.202273	0.263358	0.180926	0.207863	0.218992	0.397905		0.0360184	0.232626	0.107687	0.370121	0.0623258	0.243521	0.203743	0.320915	0.282918
35	0.369735	0.349989	0.387488	0.486913	0.544208	0.63967	0.506636	0.462018	0.474365	0.372995	0.369078	0.190093	0.174751	0.2382	0.350457	0.350643	0.175535	0.246779	0.306558	0.443291		0.106428	0.233592	0.0767788	0.320451	0.142899	0.242001	0.136679	0.327778	0.357912
40	0.332561	0.355658	0.381764									0.211079	0.215315	0.223521								0.168574	0.274954	0.136341
image name	2021_09_15_DLW128_FRAP_20C_EP_MP_LP_herm2_004	2021_09_15_DLW128_FRAP_20C_EP_MP_LP_herm2_004	2021_09_15_DLW128_FRAP_20C_EP_MP_LP_herm2_004	2022_05_07_DLW128_FRAP_20C_EP_MP_LP_herm1_004	2022_05_07_DLW128_FRAP_20C_EP_MP_LP_herm1_004	2022_05_07_DLW128_FRAP_20C_EP_MP_LP_herm2_004	2022_05_07_DLW128_FRAP_20C_EP_MP_LP_herm2_004	2022_05_07_DLW128_FRAP_20C_EP_MP_LP_herm4_004	2022_05_07_DLW128_FRAP_20C_EP_MP_LP_herm3_004	2022_05_07_DLW128_FRAP_20C_EP_MP_LP_herm3_004	2022_05_07_DLW128_FRAP_20C_EP_MP_LP_herm3_004	2021_09_15_DLW128_FRAP_20C_EP_MP_LP_herm2_004	2021_09_15_DLW128_FRAP_20C_EP_MP_LP_herm2_004	2021_09_15_DLW128_FRAP_20C_EP_MP_LP_herm2_004	2022_05_07_DLW128_FRAP_20C_EP_MP_LP_herm1_004	2022_05_07_DLW128_FRAP_20C_EP_MP_LP_herm1_004	2022_05_07_DLW128_FRAP_20C_EP_MP_LP_herm2_004	2022_05_07_DLW128_FRAP_20C_EP_MP_LP_herm2_004	2022_05_07_DLW128_FRAP_20C_EP_MP_LP_herm3_004	2022_05_07_DLW128_FRAP_20C_EP_MP_LP_herm4_004		2021_09_15_DLW128_FRAP_20C_EP_MP_LP_herm2_004	2021_09_15_DLW128_FRAP_20C_EP_MP_LP_herm2_004	2021_09_15_DLW128_FRAP_20C_EP_MP_LP_herm2_004	2022_05_07_DLW128_FRAP_20C_EP_MP_LP_herm1_004	2022_05_07_DLW128_FRAP_20C_EP_MP_LP_herm2_004	2022_05_07_DLW128_FRAP_20C_EP_MP_LP_herm2_004	2022_05_07_DLW128_FRAP_20C_EP_MP_LP_herm3_004	2022_05_07_DLW128_FRAP_20C_EP_MP_LP_herm4_004	2022_05_07_DLW128_FRAP_20C_EP_MP_LP_herm4_004
