# Supplementary material for: Sexual dimorphic regulation of recombination by the synaptonemal complex in C. elegans
Source: eLife. 2023 Oct 5;12:e84538. doi: 10.7554/eLife.84538 (PMC10611432; doi:10.7554/eLife.84538)
Supplement: Figure 3—source data 1. [file elife-84538-fig3-data1.xlsx]

## Sheet: Sheet1
nucleus_x_position	normalized_nucleus_position	meiosis_stage	Sex	Strain_number	image_name	Volume	Genotype	Protein	sum_intensity	sum_intensity_normalized_vol
0.0616971	-0.0606586	TZ	Herm	DLW118	2021_07_22_DLW118_20C_herm_01001_Statistics	18.3706	WT	SYP2GFP	2090000	113769
0.0749241	-0.0457068	TZ	Herm	DLW118	2021_07_22_DLW118_20C_herm_01001_Statistics	16.6051	WT	SYP2GFP	2080000	125263
0.102889	-0.0140957	TZ	Herm	DLW118	2021_07_22_DLW118_20C_herm_01001_Statistics	17.1555	WT	SYP2GFP	2270000	132319
0.0524799	-0.0710777	TZ	Herm	DLW118	2021_07_22_DLW118_20C_herm_01001_Statistics	15.9892	WT	SYP2GFP	1930000	120706
0.0868587	-0.0322159	TZ	Herm	DLW118	2021_07_22_DLW118_20C_herm_01001_Statistics	17.2951	WT	SYP2GFP	2270000	131251
0.0981681	-0.0194318	TZ	Herm	DLW118	2021_07_22_DLW118_20C_herm_01001_Statistics	17.3455	WT	SYP2GFP	2270000	130870
0.0600177	-0.062557	TZ	Herm	DLW118	2021_07_22_DLW118_20C_herm_01001_Statistics	15.1189	WT	SYP2GFP	2020000	133608
0.075832	-0.0446805	TZ	Herm	DLW118	2021_07_22_DLW118_20C_herm_01001_Statistics	19.709	WT	SYP2GFP	2590000	131412
0.096497	-0.0213208	TZ	Herm	DLW118	2021_07_22_DLW118_20C_herm_01001_Statistics	17.4608	WT	SYP2GFP	2440000	139742
0.106274	-0.0102688	TZ	Herm	DLW118	2021_07_22_DLW118_20C_herm_01001_Statistics	24.7386	WT	SYP2GFP	3420000	138245
0.0922571	-0.0261136	TZ	Herm	DLW118	2021_07_22_DLW118_20C_herm_01001_Statistics	21.164	WT	SYP2GFP	2860000	135135
0.0934821	-0.0247288	TZ	Herm	DLW118	2021_07_22_DLW118_20C_herm_01001_Statistics	20.984	WT	SYP2GFP	3020000	143919
0.0693468	-0.0520113	TZ	Herm	DLW118	2021_07_22_DLW118_20C_herm_01001_Statistics	17.9028	WT	SYP2GFP	2260000	126237
0.0483061	-0.0757958	TZ	Herm	DLW118	2021_07_22_DLW118_20C_herm_01001_Statistics	20.0858	WT	SYP2GFP	2490000	123968
0.111247	-0.00464733	TZ	Herm	DLW118	2021_07_22_DLW118_20C_herm_01001_Statistics	24.3707	WT	SYP2GFP	3390000	139101
0.127041	0.0132063	EP	Herm	DLW118	2021_07_22_DLW118_20C_herm_01001_Statistics	22.5303	WT	SYP2GFP	3120000	138480
0.189321	0.0836073	EP	Herm	DLW118	2021_07_22_DLW118_20C_herm_01001_Statistics	20.8687	WT	SYP2GFP	2550000	122193
0.142934	0.0311715	EP	Herm	DLW118	2021_07_22_DLW118_20C_herm_01001_Statistics	25.4706	WT	SYP2GFP	3590000	140947
0.121047	0.00643007	EP	Herm	DLW118	2021_07_22_DLW118_20C_herm_01001_Statistics	18.3271	WT	SYP2GFP	2390000	130408
0.13645	0.0238424	EP	Herm	DLW118	2021_07_22_DLW118_20C_herm_01001_Statistics	21.3611	WT	SYP2GFP	3360000	157295
0.148894	0.0379093	EP	Herm	DLW118	2021_07_22_DLW118_20C_herm_01001_Statistics	22.7053	WT	SYP2GFP	3590000	158113
0.166165	0.0574316	EP	Herm	DLW118	2021_07_22_DLW118_20C_herm_01001_Statistics	13.062	WT	SYP2GFP	1680000	128617
0.266926	0.171333	EP	Herm	DLW118	2021_07_22_DLW118_20C_herm_01001_Statistics	19.851	WT	SYP2GFP	2560000	128961
0.173153	0.0653312	EP	Herm	DLW118	2021_07_22_DLW118_20C_herm_01001_Statistics	25.8017	WT	SYP2GFP	3530000	136813
0.22856	0.127963	EP	Herm	DLW118	2021_07_22_DLW118_20C_herm_01001_Statistics	12.6527	WT	SYP2GFP	1710000	135149
0.13736	0.0248703	EP	Herm	DLW118	2021_07_22_DLW118_20C_herm_01001_Statistics	22.1406	WT	SYP2GFP	3110000	140466
0.23944	0.140263	EP	Herm	DLW118	2021_07_22_DLW118_20C_herm_01001_Statistics	29.7624	WT	SYP2GFP	4220000	141790
0.258531	0.161843	EP	Herm	DLW118	2021_07_22_DLW118_20C_herm_01001_Statistics	29.2991	WT	SYP2GFP	4560000	155636
0.217913	0.115928	EP	Herm	DLW118	2021_07_22_DLW118_20C_herm_01001_Statistics	33.7791	WT	SYP2GFP	4910000	145356
0.205053	0.101391	EP	Herm	DLW118	2021_07_22_DLW118_20C_herm_01001_Statistics	27.1071	WT	SYP2GFP	3950000	145718
0.232222	0.132103	EP	Herm	DLW118	2021_07_22_DLW118_20C_herm_01001_Statistics	31.9456	WT	SYP2GFP	4520000	141491
0.212088	0.109343	EP	Herm	DLW118	2021_07_22_DLW118_20C_herm_01001_Statistics	22.922	WT	SYP2GFP	3310000	144403
0.2665	0.170851	EP	Herm	DLW118	2021_07_22_DLW118_20C_herm_01001_Statistics	18.9284	WT	SYP2GFP	2520000	133133
0.197365	0.0927007	EP	Herm	DLW118	2021_07_22_DLW118_20C_herm_01001_Statistics	21.8222	WT	SYP2GFP	3120000	142974
0.18361	0.0771523	EP	Herm	DLW118	2021_07_22_DLW118_20C_herm_01001_Statistics	20.8452	WT	SYP2GFP	2830000	135763
0.246651	0.148414	EP	Herm	DLW118	2021_07_22_DLW118_20C_herm_01001_Statistics	16.5634	WT	SYP2GFP	2300000	138860
0.159804	0.0502418	EP	Herm	DLW118	2021_07_22_DLW118_20C_herm_01001_Statistics	27.2379	WT	SYP2GFP	3880000	142449
0.255347	0.158244	EP	Herm	DLW118	2021_07_22_DLW118_20C_herm_01001_Statistics	26.8703	WT	SYP2GFP	3620000	134721
0.300118	0.208853	EP	Herm	DLW118	2021_07_22_DLW118_20C_herm_01001_Statistics	33.6346	WT	SYP2GFP	4540000	134980
0.313556	0.224043	EP	Herm	DLW118	2021_07_22_DLW118_20C_herm_01001_Statistics	27.0029	WT	SYP2GFP	3810000	141096
0.298085	0.206554	EP	Herm	DLW118	2021_07_22_DLW118_20C_herm_01001_Statistics	32.4599	WT	SYP2GFP	4730000	145718
0.291617	0.199244	EP	Herm	DLW118	2021_07_22_DLW118_20C_herm_01001_Statistics	29.0273	WT	SYP2GFP	3920000	135045
0.316963	0.227894	EP	Herm	DLW118	2021_07_22_DLW118_20C_herm_01001_Statistics	30.4187	WT	SYP2GFP	4400000	144648
0.335765	0.249148	EP	Herm	DLW118	2021_07_22_DLW118_20C_herm_01001_Statistics	27.0354	WT	SYP2GFP	3830000	141666
0.35742	0.273627	EP	Herm	DLW118	2021_07_22_DLW118_20C_herm_01001_Statistics	31.4992	WT	SYP2GFP	4800000	152385
0.38638	0.306363	EP	Herm	DLW118	2021_07_22_DLW118_20C_herm_01001_Statistics	33.1565	WT	SYP2GFP	4720000	142355
0.364811	0.281981	EP	Herm	DLW118	2021_07_22_DLW118_20C_herm_01001_Statistics	27.0855	WT	SYP2GFP	4020000	148419
0.33355	0.246644	EP	Herm	DLW118	2021_07_22_DLW118_20C_herm_01001_Statistics	25.8311	WT	SYP2GFP	3980000	154078
0.396571	0.317883	EP	Herm	DLW118	2021_07_22_DLW118_20C_herm_01001_Statistics	23.9718	WT	SYP2GFP	3270000	136410
0.316783	0.22769	EP	Herm	DLW118	2021_07_22_DLW118_20C_herm_01001_Statistics	24.0497	WT	SYP2GFP	3290000	136800
0.337059	0.250611	EP	Herm	DLW118	2021_07_22_DLW118_20C_herm_01001_Statistics	35.4908	WT	SYP2GFP	5320000	149898
0.316646	0.227535	EP	Herm	DLW118	2021_07_22_DLW118_20C_herm_01001_Statistics	22.1622	WT	SYP2GFP	3150000	142134
0.399912	0.32166	EP	Herm	DLW118	2021_07_22_DLW118_20C_herm_01001_Statistics	33.4452	WT	SYP2GFP	5070000	151591
0.413602	0.337135	MP	Herm	DLW118	2021_07_22_DLW118_20C_herm_01001_Statistics	38.8466	WT	SYP2GFP	6570000	169127
0.381862	0.301256	EP	Herm	DLW118	2021_07_22_DLW118_20C_herm_01001_Statistics	34.8096	WT	SYP2GFP	5170000	148522
0.432691	0.358713	MP	Herm	DLW118	2021_07_22_DLW118_20C_herm_01001_Statistics	32.851	WT	SYP2GFP	5010000	152507
0.389143	0.309487	EP	Herm	DLW118	2021_07_22_DLW118_20C_herm_01001_Statistics	35.273	WT	SYP2GFP	5880000	166700
0.410478	0.333603	MP	Herm	DLW118	2021_07_22_DLW118_20C_herm_01001_Statistics	31.8573	WT	SYP2GFP	4210000	132152
0.418345	0.342497	MP	Herm	DLW118	2021_07_22_DLW118_20C_herm_01001_Statistics	31.9913	WT	SYP2GFP	4650000	145352
0.427449	0.352788	MP	Herm	DLW118	2021_07_22_DLW118_20C_herm_01001_Statistics	36.4002	WT	SYP2GFP	5990000	164560
0.395636	0.316826	EP	Herm	DLW118	2021_07_22_DLW118_20C_herm_01001_Statistics	37.5459	WT	SYP2GFP	5990000	159538
0.474277	0.405722	MP	Herm	DLW118	2021_07_22_DLW118_20C_herm_01001_Statistics	38.4682	WT	SYP2GFP	6240000	162212
0.493734	0.427717	MP	Herm	DLW118	2021_07_22_DLW118_20C_herm_01001_Statistics	40.0821	WT	SYP2GFP	6410000	159922
0.45071	0.379082	MP	Herm	DLW118	2021_07_22_DLW118_20C_herm_01001_Statistics	31.387	WT	SYP2GFP	4600000	146557
0.45064	0.379003	MP	Herm	DLW118	2021_07_22_DLW118_20C_herm_01001_Statistics	26.9791	WT	SYP2GFP	4110000	152340
0.462708	0.392645	MP	Herm	DLW118	2021_07_22_DLW118_20C_herm_01001_Statistics	39.7641	WT	SYP2GFP	6480000	162961
0.481232	0.413584	MP	Herm	DLW118	2021_07_22_DLW118_20C_herm_01001_Statistics	32.1686	WT	SYP2GFP	4930000	153255
0.495488	0.429699	MP	Herm	DLW118	2021_07_22_DLW118_20C_herm_01001_Statistics	40.4499	WT	SYP2GFP	6490000	160445
0.441365	0.368518	MP	Herm	DLW118	2021_07_22_DLW118_20C_herm_01001_Statistics	36.7185	WT	SYP2GFP	6070000	165312
0.457421	0.386668	MP	Herm	DLW118	2021_07_22_DLW118_20C_herm_01001_Statistics	32.1841	WT	SYP2GFP	5200000	161570
0.440232	0.367238	MP	Herm	DLW118	2021_07_22_DLW118_20C_herm_01001_Statistics	35.8908	WT	SYP2GFP	5680000	158258
0.459026	0.388483	MP	Herm	DLW118	2021_07_22_DLW118_20C_herm_01001_Statistics	28.7855	WT	SYP2GFP	4070000	141391
0.530003	0.468715	MP	Herm	DLW118	2021_07_22_DLW118_20C_herm_01001_Statistics	46.5894	WT	SYP2GFP	7770000	166776
0.472958	0.404231	MP	Herm	DLW118	2021_07_22_DLW118_20C_herm_01001_Statistics	29.7584	WT	SYP2GFP	4130000	138784
0.491268	0.424929	MP	Herm	DLW118	2021_07_22_DLW118_20C_herm_01001_Statistics	39.3269	WT	SYP2GFP	6270000	159433
0.553961	0.495797	MP	Herm	DLW118	2021_07_22_DLW118_20C_herm_01001_Statistics	27.7085	WT	SYP2GFP	3940000	142195
0.582292	0.527822	MP	Herm	DLW118	2021_07_22_DLW118_20C_herm_01001_Statistics	29.7582	WT	SYP2GFP	4140000	139121
0.599956	0.547789	MP	Herm	DLW118	2021_07_22_DLW118_20C_herm_01001_Statistics	31.5416	WT	SYP2GFP	4410000	139815
0.52456	0.462562	MP	Herm	DLW118	2021_07_22_DLW118_20C_herm_01001_Statistics	50.198	WT	SYP2GFP	8950000	178294
0.547161	0.48811	MP	Herm	DLW118	2021_07_22_DLW118_20C_herm_01001_Statistics	24.3691	WT	SYP2GFP	3440000	141162
0.552035	0.49362	MP	Herm	DLW118	2021_07_22_DLW118_20C_herm_01001_Statistics	32.6631	WT	SYP2GFP	4810000	147261
0.573877	0.51831	MP	Herm	DLW118	2021_07_22_DLW118_20C_herm_01001_Statistics	32.2696	WT	SYP2GFP	4650000	144098
0.607497	0.556315	MP	Herm	DLW118	2021_07_22_DLW118_20C_herm_01001_Statistics	31.059	WT	SYP2GFP	4380000	141022
0.593256	0.540216	MP	Herm	DLW118	2021_07_22_DLW118_20C_herm_01001_Statistics	31.8069	WT	SYP2GFP	4530000	142422
0.621519	0.572165	MP	Herm	DLW118	2021_07_22_DLW118_20C_herm_01001_Statistics	36.5869	WT	SYP2GFP	5340000	145954
0.643876	0.597437	MP	Herm	DLW118	2021_07_22_DLW118_20C_herm_01001_Statistics	30.1124	WT	SYP2GFP	4280000	142134
0.666048	0.6225	MP	Herm	DLW118	2021_07_22_DLW118_20C_herm_01001_Statistics	25.4338	WT	SYP2GFP	3540000	139185
0.623159	0.574018	MP	Herm	DLW118	2021_07_22_DLW118_20C_herm_01001_Statistics	29.5651	WT	SYP2GFP	4450000	150515
0.735873	0.70143	LP	Herm	DLW118	2021_07_22_DLW118_20C_herm_01001_Statistics	34.3116	WT	SYP2GFP	4510000	131442
0.690124	0.649715	MP	Herm	DLW118	2021_07_22_DLW118_20C_herm_01001_Statistics	32.196	WT	SYP2GFP	4710000	146291
0.649978	0.604335	MP	Herm	DLW118	2021_07_22_DLW118_20C_herm_01001_Statistics	32.7116	WT	SYP2GFP	4530000	138483
0.64393	0.597499	MP	Herm	DLW118	2021_07_22_DLW118_20C_herm_01001_Statistics	36.9433	WT	SYP2GFP	5280000	142922
0.634566	0.586913	MP	Herm	DLW118	2021_07_22_DLW118_20C_herm_01001_Statistics	40.118	WT	SYP2GFP	5730000	142829
0.659634	0.61525	MP	Herm	DLW118	2021_07_22_DLW118_20C_herm_01001_Statistics	31.2618	WT	SYP2GFP	4430000	141706
0.717654	0.680836	LP	Herm	DLW118	2021_07_22_DLW118_20C_herm_01001_Statistics	35.575	WT	SYP2GFP	4960000	139424
0.673349	0.630754	MP	Herm	DLW118	2021_07_22_DLW118_20C_herm_01001_Statistics	35.8741	WT	SYP2GFP	5360000	149411
0.685453	0.644436	MP	Herm	DLW118	2021_07_22_DLW118_20C_herm_01001_Statistics	33.9289	WT	SYP2GFP	4930000	145304
0.743998	0.710615	LP	Herm	DLW118	2021_07_22_DLW118_20C_herm_01001_Statistics	29.5789	WT	SYP2GFP	4140000	139965
0.729253	0.693947	LP	Herm	DLW118	2021_07_22_DLW118_20C_herm_01001_Statistics	38.8612	WT	SYP2GFP	5820000	149764
0.671912	0.629129	MP	Herm	DLW118	2021_07_22_DLW118_20C_herm_01001_Statistics	31.9786	WT	SYP2GFP	4660000	145722
0.712864	0.675421	LP	Herm	DLW118	2021_07_22_DLW118_20C_herm_01001_Statistics	33.735	WT	SYP2GFP	4930000	146139
0.742046	0.708409	LP	Herm	DLW118	2021_07_22_DLW118_20C_herm_01001_Statistics	38.4948	WT	SYP2GFP	5900000	153267
0.754209	0.722157	LP	Herm	DLW118	2021_07_22_DLW118_20C_herm_01001_Statistics	36.3068	WT	SYP2GFP	5020000	138266
0.754209	0.722157	LP	Herm	DLW118	2021_07_22_DLW118_20C_herm_01001_Statistics	40.9064	WT	SYP2GFP	5640000	137876
0.816673	0.792767	LP	Herm	DLW118	2021_07_22_DLW118_20C_herm_01001_Statistics	36.4887	WT	SYP2GFP	4890000	134014
0.80121	0.775287	LP	Herm	DLW118	2021_07_22_DLW118_20C_herm_01001_Statistics	35.6158	WT	SYP2GFP	4800000	134772
0.778506	0.749623	LP	Herm	DLW118	2021_07_22_DLW118_20C_herm_01001_Statistics	33.0905	WT	SYP2GFP	4400000	132969
0.814047	0.789799	LP	Herm	DLW118	2021_07_22_DLW118_20C_herm_01001_Statistics	34.7356	WT	SYP2GFP	4620000	133005
0.878229	0.86235	LP	Herm	DLW118	2021_07_22_DLW118_20C_herm_01001_Statistics	34.4075	WT	SYP2GFP	4420000	128460
0.832529	0.810691	LP	Herm	DLW118	2021_07_22_DLW118_20C_herm_01001_Statistics	32.9026	WT	SYP2GFP	4400000	133728
0.844586	0.82432	LP	Herm	DLW118	2021_07_22_DLW118_20C_herm_01001_Statistics	34.491	WT	SYP2GFP	4510000	130759
0.900368	0.887376	LP	Herm	DLW118	2021_07_22_DLW118_20C_herm_01001_Statistics	31.5218	WT	SYP2GFP	4090000	129751
0.861738	0.843709	LP	Herm	DLW118	2021_07_22_DLW118_20C_herm_01001_Statistics	31.9075	WT	SYP2GFP	4260000	133511
0.787834	0.760167	LP	Herm	DLW118	2021_07_22_DLW118_20C_herm_01001_Statistics	38.7817	WT	SYP2GFP	5350000	137952
0.767625	0.737323	LP	Herm	DLW118	2021_07_22_DLW118_20C_herm_01001_Statistics	36.9387	WT	SYP2GFP	5280000	142940
0.842723	0.822214	LP	Herm	DLW118	2021_07_22_DLW118_20C_herm_01001_Statistics	37.1902	WT	SYP2GFP	4980000	133906
0.883368	0.868159	LP	Herm	DLW118	2021_07_22_DLW118_20C_herm_01001_Statistics	35.9795	WT	SYP2GFP	4790000	133131
0.972957	0.969431	LP	Herm	DLW118	2021_07_22_DLW118_20C_herm_01001_Statistics	31.4127	WT	SYP2GFP	3820000	121607
0.937278	0.929099	LP	Herm	DLW118	2021_07_22_DLW118_20C_herm_01001_Statistics	42.9103	WT	SYP2GFP	5340000	124446
0.941453	0.933818	LP	Herm	DLW118	2021_07_22_DLW118_20C_herm_01001_Statistics	15.4952	WT	SYP2GFP	2000000	129072
0.907523	0.895464	LP	Herm	DLW118	2021_07_22_DLW118_20C_herm_01001_Statistics	37.404	WT	SYP2GFP	4940000	132071
0.917338	0.906559	LP	Herm	DLW118	2021_07_22_DLW118_20C_herm_01001_Statistics	36.5228	WT	SYP2GFP	5150000	141008
0.953652	0.947609	LP	Herm	DLW118	2021_07_22_DLW118_20C_herm_01001_Statistics	18.7621	WT	SYP2GFP	2460000	131115
0.928789	0.919503	LP	Herm	DLW118	2021_07_22_DLW118_20C_herm_01001_Statistics	30.5726	WT	SYP2GFP	3930000	128546
1	1	LP	Herm	DLW118	2021_07_22_DLW118_20C_herm_01001_Statistics	27.4584	WT	SYP2GFP	3450000	125645
0.0467752	-0.0813345	TZ	Herm	DLW118	2021_07_22_DLW118_20C_herm_01002_Statistics	18.0465	WT	SYP2GFP	2260000	125232
0.110131	-0.00946398	TZ	Herm	DLW118	2021_07_22_DLW118_20C_herm_01002_Statistics	15.2985	WT	SYP2GFP	1960000	128117
0.070013	-0.0549736	TZ	Herm	DLW118	2021_07_22_DLW118_20C_herm_01002_Statistics	15.3411	WT	SYP2GFP	2000000	130369
0.111474	-0.00794078	TZ	Herm	DLW118	2021_07_22_DLW118_20C_herm_01002_Statistics	16.885	WT	SYP2GFP	2140000	126740
0.0469564	-0.0811289	TZ	Herm	DLW118	2021_07_22_DLW118_20C_herm_01002_Statistics	20.1834	WT	SYP2GFP	2410000	119405
0.0723877	-0.0522798	TZ	Herm	DLW118	2021_07_22_DLW118_20C_herm_01002_Statistics	16.0109	WT	SYP2GFP	2100000	131161
0.089161	-0.0332522	TZ	Herm	DLW118	2021_07_22_DLW118_20C_herm_01002_Statistics	19.2016	WT	SYP2GFP	2820000	146863
0.0429352	-0.0856906	TZ	Herm	DLW118	2021_07_22_DLW118_20C_herm_01002_Statistics	20.6594	WT	SYP2GFP	2430000	117622
0.110552	-0.00898603	TZ	Herm	DLW118	2021_07_22_DLW118_20C_herm_01002_Statistics	31.9887	WT	SYP2GFP	4260000	133172
0.0666054	-0.0588392	TZ	Herm	DLW118	2021_07_22_DLW118_20C_herm_01002_Statistics	16.9984	WT	SYP2GFP	2180000	128247
0.0874976	-0.0351391	TZ	Herm	DLW118	2021_07_22_DLW118_20C_herm_01002_Statistics	20.7492	WT	SYP2GFP	2840000	136873
0.0596758	-0.0667	TZ	Herm	DLW118	2021_07_22_DLW118_20C_herm_01002_Statistics	24.4563	WT	SYP2GFP	3350000	136979
0.108861	-0.0109046	TZ	Herm	DLW118	2021_07_22_DLW118_20C_herm_01002_Statistics	22.9981	WT	SYP2GFP	2950000	128271
0.255678	0.155644	EP	Herm	DLW118	2021_07_22_DLW118_20C_herm_01002_Statistics	26.8494	WT	SYP2GFP	3300000	122908
0.268351	0.17002	EP	Herm	DLW118	2021_07_22_DLW118_20C_herm_01002_Statistics	21.0632	WT	SYP2GFP	2820000	133883
0.195174	0.0870082	EP	Herm	DLW118	2021_07_22_DLW118_20C_herm_01002_Statistics	29.3498	WT	SYP2GFP	3730000	127088
0.170783	0.059339	EP	Herm	DLW118	2021_07_22_DLW118_20C_herm_01002_Statistics	9.22454	WT	SYP2GFP	1220000	132256
0.150479	0.0363062	EP	Herm	DLW118	2021_07_22_DLW118_20C_herm_01002_Statistics	24.9875	WT	SYP2GFP	3840000	153677
0.234078	0.131141	EP	Herm	DLW118	2021_07_22_DLW118_20C_herm_01002_Statistics	19.0864	WT	SYP2GFP	2740000	143558
0.255315	0.155233	EP	Herm	DLW118	2021_07_22_DLW118_20C_herm_01002_Statistics	30.0875	WT	SYP2GFP	4720000	156876
0.207493	0.100984	EP	Herm	DLW118	2021_07_22_DLW118_20C_herm_01002_Statistics	30.9556	WT	SYP2GFP	4340000	140201
0.186138	0.0767583	EP	Herm	DLW118	2021_07_22_DLW118_20C_herm_01002_Statistics	30.9575	WT	SYP2GFP	4110000	132763
0.158342	0.045226	EP	Herm	DLW118	2021_07_22_DLW118_20C_herm_01002_Statistics	26.2112	WT	SYP2GFP	3700000	141161
0.128827	0.0117445	EP	Herm	DLW118	2021_07_22_DLW118_20C_herm_01002_Statistics	27.2406	WT	SYP2GFP	3660000	134358
0.242693	0.140913	EP	Herm	DLW118	2021_07_22_DLW118_20C_herm_01002_Statistics	30.1039	WT	SYP2GFP	4180000	138852
0.217825	0.112704	EP	Herm	DLW118	2021_07_22_DLW118_20C_herm_01002_Statistics	21.2227	WT	SYP2GFP	2840000	133819
0.170294	0.0587849	EP	Herm	DLW118	2021_07_22_DLW118_20C_herm_01002_Statistics	29.1837	WT	SYP2GFP	4080000	139804
0.200977	0.0935915	EP	Herm	DLW118	2021_07_22_DLW118_20C_herm_01002_Statistics	9.93353	WT	SYP2GFP	1460000	146977
0.22473	0.120537	EP	Herm	DLW118	2021_07_22_DLW118_20C_herm_01002_Statistics	34.8353	WT	SYP2GFP	4870000	139801
0.25243	0.15196	EP	Herm	DLW118	2021_07_22_DLW118_20C_herm_01002_Statistics	31.048	WT	SYP2GFP	4650000	149768
0.134551	0.0182385	EP	Herm	DLW118	2021_07_22_DLW118_20C_herm_01002_Statistics	30.6114	WT	SYP2GFP	4110000	134264
0.199327	0.0917199	EP	Herm	DLW118	2021_07_22_DLW118_20C_herm_01002_Statistics	18.6443	WT	SYP2GFP	2620000	140526
0.208115	0.101688	EP	Herm	DLW118	2021_07_22_DLW118_20C_herm_01002_Statistics	31.7882	WT	SYP2GFP	4640000	145966
0.266226	0.167609	EP	Herm	DLW118	2021_07_22_DLW118_20C_herm_01002_Statistics	35.8769	WT	SYP2GFP	5390000	150236
0.120293	0.00206411	EP	Herm	DLW118	2021_07_22_DLW118_20C_herm_01002_Statistics	24.2179	WT	SYP2GFP	3470000	143282
0.136738	0.0207192	EP	Herm	DLW118	2021_07_22_DLW118_20C_herm_01002_Statistics	20.9107	WT	SYP2GFP	2720000	130077
0.388075	0.305835	EP	Herm	DLW118	2021_07_22_DLW118_20C_herm_01002_Statistics	30.0012	WT	SYP2GFP	4840000	161327
0.333445	0.243862	EP	Herm	DLW118	2021_07_22_DLW118_20C_herm_01002_Statistics	14.6141	WT	SYP2GFP	2150000	147118
0.30557	0.212242	EP	Herm	DLW118	2021_07_22_DLW118_20C_herm_01002_Statistics	29.8927	WT	SYP2GFP	4240000	141841
0.276115	0.178828	EP	Herm	DLW118	2021_07_22_DLW118_20C_herm_01002_Statistics	31.7873	WT	SYP2GFP	4390000	138105
0.405174	0.325231	EP	Herm	DLW118	2021_07_22_DLW118_20C_herm_01002_Statistics	34.5922	WT	SYP2GFP	5600000	161886
0.381221	0.29806	EP	Herm	DLW118	2021_07_22_DLW118_20C_herm_01002_Statistics	27.7951	WT	SYP2GFP	4540000	163338
0.324489	0.233703	EP	Herm	DLW118	2021_07_22_DLW118_20C_herm_01002_Statistics	35.1057	WT	SYP2GFP	5200000	148124
0.352332	0.265288	EP	Herm	DLW118	2021_07_22_DLW118_20C_herm_01002_Statistics	25.8243	WT	SYP2GFP	3530000	136693
0.292373	0.197271	EP	Herm	DLW118	2021_07_22_DLW118_20C_herm_01002_Statistics	22.5607	WT	SYP2GFP	3130000	138737
0.443767	0.369012	MP	Herm	DLW118	2021_07_22_DLW118_20C_herm_01002_Statistics	41.295	WT	SYP2GFP	6150000	148928
0.391571	0.309801	EP	Herm	DLW118	2021_07_22_DLW118_20C_herm_01002_Statistics	30.4473	WT	SYP2GFP	5350000	175713
0.415066	0.336453	MP	Herm	DLW118	2021_07_22_DLW118_20C_herm_01002_Statistics	32.4835	WT	SYP2GFP	5570000	171472
0.282126	0.185647	EP	Herm	DLW118	2021_07_22_DLW118_20C_herm_01002_Statistics	30.1022	WT	SYP2GFP	4350000	144508
0.339214	0.250407	EP	Herm	DLW118	2021_07_22_DLW118_20C_herm_01002_Statistics	33.0443	WT	SYP2GFP	5000000	151312
0.309168	0.216322	EP	Herm	DLW118	2021_07_22_DLW118_20C_herm_01002_Statistics	29.995	WT	SYP2GFP	4410000	147025
0.368854	0.284031	EP	Herm	DLW118	2021_07_22_DLW118_20C_herm_01002_Statistics	37.0845	WT	SYP2GFP	6090000	164220
0.395435	0.314184	EP	Herm	DLW118	2021_07_22_DLW118_20C_herm_01002_Statistics	41.2201	WT	SYP2GFP	6960000	168850
0.427378	0.350419	MP	Herm	DLW118	2021_07_22_DLW118_20C_herm_01002_Statistics	38.6164	WT	SYP2GFP	6080000	157446
0.351404	0.264235	EP	Herm	DLW118	2021_07_22_DLW118_20C_herm_01002_Statistics	37.2817	WT	SYP2GFP	5860000	157182
0.3232	0.23224	EP	Herm	DLW118	2021_07_22_DLW118_20C_herm_01002_Statistics	36.549	WT	SYP2GFP	5950000	162795
0.272834	0.175106	EP	Herm	DLW118	2021_07_22_DLW118_20C_herm_01002_Statistics	34.336	WT	SYP2GFP	5200000	151445
0.374592	0.29054	EP	Herm	DLW118	2021_07_22_DLW118_20C_herm_01002_Statistics	39.8394	WT	SYP2GFP	6840000	171689
0.418121	0.339918	MP	Herm	DLW118	2021_07_22_DLW118_20C_herm_01002_Statistics	46.4145	WT	SYP2GFP	7520000	162018
0.286771	0.190915	EP	Herm	DLW118	2021_07_22_DLW118_20C_herm_01002_Statistics	19.4005	WT	SYP2GFP	3060000	157728
0.310069	0.217345	EP	Herm	DLW118	2021_07_22_DLW118_20C_herm_01002_Statistics	31.8695	WT	SYP2GFP	5420000	170069
0.446698	0.372336	MP	Herm	DLW118	2021_07_22_DLW118_20C_herm_01002_Statistics	45.7069	WT	SYP2GFP	7350000	160807
0.392122	0.310426	EP	Herm	DLW118	2021_07_22_DLW118_20C_herm_01002_Statistics	31.1198	WT	SYP2GFP	6300000	202443
0.336338	0.247144	EP	Herm	DLW118	2021_07_22_DLW118_20C_herm_01002_Statistics	38.505	WT	SYP2GFP	6120000	158940
0.316351	0.224472	EP	Herm	DLW118	2021_07_22_DLW118_20C_herm_01002_Statistics	31.0878	WT	SYP2GFP	4750000	152793
0.298696	0.204443	EP	Herm	DLW118	2021_07_22_DLW118_20C_herm_01002_Statistics	17.7958	WT	SYP2GFP	2480000	139359
0.439641	0.364331	MP	Herm	DLW118	2021_07_22_DLW118_20C_herm_01002_Statistics	43.2277	WT	SYP2GFP	7370000	170493
0.669614	0.625211	MP	Herm	DLW118	2021_07_22_DLW118_20C_herm_01002_Statistics	37.9789	WT	SYP2GFP	5430000	142974
0.697958	0.657365	MP	Herm	DLW118	2021_07_22_DLW118_20C_herm_01002_Statistics	39.4285	WT	SYP2GFP	5540000	140508
0.651668	0.604854	MP	Herm	DLW118	2021_07_22_DLW118_20C_herm_01002_Statistics	33.1334	WT	SYP2GFP	4730000	142756
0.680448	0.637502	MP	Herm	DLW118	2021_07_22_DLW118_20C_herm_01002_Statistics	36.5431	WT	SYP2GFP	4960000	135730
0.651212	0.604336	MP	Herm	DLW118	2021_07_22_DLW118_20C_herm_01002_Statistics	42.1235	WT	SYP2GFP	5930000	140777
0.619926	0.568846	MP	Herm	DLW118	2021_07_22_DLW118_20C_herm_01002_Statistics	41.5989	WT	SYP2GFP	5950000	143033
0.685741	0.643506	MP	Herm	DLW118	2021_07_22_DLW118_20C_herm_01002_Statistics	46.5197	WT	SYP2GFP	6670000	143380
0.655765	0.609501	MP	Herm	DLW118	2021_07_22_DLW118_20C_herm_01002_Statistics	43.4337	WT	SYP2GFP	6210000	142977
0.612951	0.560934	MP	Herm	DLW118	2021_07_22_DLW118_20C_herm_01002_Statistics	55.303	WT	SYP2GFP	8320000	150444
0.692957	0.651692	MP	Herm	DLW118	2021_07_22_DLW118_20C_herm_01002_Statistics	27.0856	WT	SYP2GFP	4110000	151741
0.641453	0.593265	MP	Herm	DLW118	2021_07_22_DLW118_20C_herm_01002_Statistics	23.3408	WT	SYP2GFP	3650000	156379
0.629848	0.580101	MP	Herm	DLW118	2021_07_22_DLW118_20C_herm_01002_Statistics	23.126	WT	SYP2GFP	3500000	151345
0.674068	0.630264	MP	Herm	DLW118	2021_07_22_DLW118_20C_herm_01002_Statistics	48.1038	WT	SYP2GFP	7240000	150508
0.482514	0.412966	MP	Herm	DLW118	2021_07_22_DLW118_20C_herm_01002_Statistics	33.9827	WT	SYP2GFP	4490000	132126
0.457272	0.384331	MP	Herm	DLW118	2021_07_22_DLW118_20C_herm_01002_Statistics	34.3179	WT	SYP2GFP	5010000	145988
0.512203	0.446644	MP	Herm	DLW118	2021_07_22_DLW118_20C_herm_01002_Statistics	27.8315	WT	SYP2GFP	3720000	133661
0.53793	0.475829	MP	Herm	DLW118	2021_07_22_DLW118_20C_herm_01002_Statistics	33.0963	WT	SYP2GFP	4550000	137478
0.566156	0.507849	MP	Herm	DLW118	2021_07_22_DLW118_20C_herm_01002_Statistics	30.4778	WT	SYP2GFP	4230000	138790
0.471057	0.399969	MP	Herm	DLW118	2021_07_22_DLW118_20C_herm_01002_Statistics	23.3184	WT	SYP2GFP	3120000	133800
0.610488	0.55814	MP	Herm	DLW118	2021_07_22_DLW118_20C_herm_01002_Statistics	29.9655	WT	SYP2GFP	4270000	142497
0.525102	0.461278	MP	Herm	DLW118	2021_07_22_DLW118_20C_herm_01002_Statistics	29.6786	WT	SYP2GFP	3850000	129723
0.552498	0.492355	MP	Herm	DLW118	2021_07_22_DLW118_20C_herm_01002_Statistics	36.5641	WT	SYP2GFP	5050000	138114
0.579367	0.522835	MP	Herm	DLW118	2021_07_22_DLW118_20C_herm_01002_Statistics	35.0374	WT	SYP2GFP	4820000	137567
0.476313	0.405932	MP	Herm	DLW118	2021_07_22_DLW118_20C_herm_01002_Statistics	23.4344	WT	SYP2GFP	3150000	134418
0.45313	0.379632	MP	Herm	DLW118	2021_07_22_DLW118_20C_herm_01002_Statistics	21.1095	WT	SYP2GFP	3000000	142116
0.516319	0.451314	MP	Herm	DLW118	2021_07_22_DLW118_20C_herm_01002_Statistics	25.8179	WT	SYP2GFP	3550000	137502
0.491947	0.423666	MP	Herm	DLW118	2021_07_22_DLW118_20C_herm_01002_Statistics	27.4427	WT	SYP2GFP	3860000	140657
0.471956	0.400989	MP	Herm	DLW118	2021_07_22_DLW118_20C_herm_01002_Statistics	27.4437	WT	SYP2GFP	3900000	142109
0.541401	0.479767	MP	Herm	DLW118	2021_07_22_DLW118_20C_herm_01002_Statistics	43.8722	WT	SYP2GFP	6430000	146562
0.570006	0.512216	MP	Herm	DLW118	2021_07_22_DLW118_20C_herm_01002_Statistics	31.8712	WT	SYP2GFP	4370000	137114
0.527572	0.46408	MP	Herm	DLW118	2021_07_22_DLW118_20C_herm_01002_Statistics	37.893	WT	SYP2GFP	5920000	156229
0.4988	0.431441	MP	Herm	DLW118	2021_07_22_DLW118_20C_herm_01002_Statistics	37.7542	WT	SYP2GFP	5590000	148063
0.56091	0.501898	MP	Herm	DLW118	2021_07_22_DLW118_20C_herm_01002_Statistics	14.258	WT	SYP2GFP	2190000	153598
0.588738	0.533466	MP	Herm	DLW118	2021_07_22_DLW118_20C_herm_01002_Statistics	40.7986	WT	SYP2GFP	6090000	149270
0.557136	0.497617	MP	Herm	DLW118	2021_07_22_DLW118_20C_herm_01002_Statistics	24.8186	WT	SYP2GFP	3420000	137800
0.637347	0.588607	MP	Herm	DLW118	2021_07_22_DLW118_20C_herm_01002_Statistics	35.2076	WT	SYP2GFP	4770000	135482
0.625316	0.57496	MP	Herm	DLW118	2021_07_22_DLW118_20C_herm_01002_Statistics	33.5892	WT	SYP2GFP	4730000	140819
0.598992	0.545099	MP	Herm	DLW118	2021_07_22_DLW118_20C_herm_01002_Statistics	39.9396	WT	SYP2GFP	5340000	133702
0.541305	0.479659	MP	Herm	DLW118	2021_07_22_DLW118_20C_herm_01002_Statistics	52.7427	WT	SYP2GFP	7920000	150163
0.707873	0.668612	LP	Herm	DLW118	2021_07_22_DLW118_20C_herm_01002_Statistics	37.4481	WT	SYP2GFP	5050000	134853
0.867489	0.84968	LP	Herm	DLW118	2021_07_22_DLW118_20C_herm_01002_Statistics	52.3813	WT	SYP2GFP	7020000	134017
0.739087	0.704021	LP	Herm	DLW118	2021_07_22_DLW118_20C_herm_01002_Statistics	43.5325	WT	SYP2GFP	5810000	133464
0.777547	0.74765	LP	Herm	DLW118	2021_07_22_DLW118_20C_herm_01002_Statistics	42.7845	WT	SYP2GFP	5930000	138602
0.936107	0.92752	LP	Herm	DLW118	2021_07_22_DLW118_20C_herm_01002_Statistics	52.6434	WT	SYP2GFP	7210000	136959
0.999123	0.999005	LP	Herm	DLW118	2021_07_22_DLW118_20C_herm_01002_Statistics	21.1375	WT	SYP2GFP	2660000	125843
0.991392	0.990236	LP	Herm	DLW118	2021_07_22_DLW118_20C_herm_01002_Statistics	26.3299	WT	SYP2GFP	3550000	134828
0.814166	0.789191	LP	Herm	DLW118	2021_07_22_DLW118_20C_herm_01002_Statistics	47.5035	WT	SYP2GFP	6570000	138306
0.851169	0.831166	LP	Herm	DLW118	2021_07_22_DLW118_20C_herm_01002_Statistics	38.4125	WT	SYP2GFP	4950000	128864
0.727074	0.690393	LP	Herm	DLW118	2021_07_22_DLW118_20C_herm_01002_Statistics	39.6731	WT	SYP2GFP	5340000	134600
0.766483	0.735099	LP	Herm	DLW118	2021_07_22_DLW118_20C_herm_01002_Statistics	48.911	WT	SYP2GFP	6670000	136370
0.923002	0.912654	LP	Herm	DLW118	2021_07_22_DLW118_20C_herm_01002_Statistics	39.3793	WT	SYP2GFP	5250000	133319
0.960234	0.95489	LP	Herm	DLW118	2021_07_22_DLW118_20C_herm_01002_Statistics	43.4277	WT	SYP2GFP	5730000	131943
0.800837	0.77407	LP	Herm	DLW118	2021_07_22_DLW118_20C_herm_01002_Statistics	47.8062	WT	SYP2GFP	6760000	141404
0.719377	0.681662	LP	Herm	DLW118	2021_07_22_DLW118_20C_herm_01002_Statistics	19.8158	WT	SYP2GFP	3070000	154927
0.997558	0.997229	LP	Herm	DLW118	2021_07_22_DLW118_20C_herm_01002_Statistics	20.8511	WT	SYP2GFP	2830000	135724
0.837859	0.816067	LP	Herm	DLW118	2021_07_22_DLW118_20C_herm_01002_Statistics	49.3728	WT	SYP2GFP	6840000	138538
0.770239	0.73936	LP	Herm	DLW118	2021_07_22_DLW118_20C_herm_01002_Statistics	50.4706	WT	SYP2GFP	7310000	144837
0.878012	0.861618	LP	Herm	DLW118	2021_07_22_DLW118_20C_herm_01002_Statistics	47.7114	WT	SYP2GFP	6540000	137074
0.814289	0.78933	LP	Herm	DLW118	2021_07_22_DLW118_20C_herm_01002_Statistics	49.1079	WT	SYP2GFP	7190000	146412
0.98086	0.978287	LP	Herm	DLW118	2021_07_22_DLW118_20C_herm_01002_Statistics	39.8961	WT	SYP2GFP	5670000	142119
0.949535	0.942753	LP	Herm	DLW118	2021_07_22_DLW118_20C_herm_01002_Statistics	43.8956	WT	SYP2GFP	6120000	139422
0.911273	0.899349	LP	Herm	DLW118	2021_07_22_DLW118_20C_herm_01002_Statistics	41.4184	WT	SYP2GFP	5570000	134481
0.822188	0.798291	LP	Herm	DLW118	2021_07_22_DLW118_20C_herm_01002_Statistics	51.2489	WT	SYP2GFP	6960000	135808
0.897585	0.883821	LP	Herm	DLW118	2021_07_22_DLW118_20C_herm_01002_Statistics	51.7643	WT	SYP2GFP	7290000	140831
0.925412	0.915388	LP	Herm	DLW118	2021_07_22_DLW118_20C_herm_01002_Statistics	50.0882	WT	SYP2GFP	7180000	143347
0.973236	0.969639	LP	Herm	DLW118	2021_07_22_DLW118_20C_herm_01002_Statistics	54.1499	WT	SYP2GFP	8170000	150877
0.959722	0.954309	LP	Herm	DLW118	2021_07_22_DLW118_20C_herm_01002_Statistics	47.8554	WT	SYP2GFP	7060000	147528
1	1	LP	Herm	DLW118	2021_07_22_DLW118_20C_herm_01002_Statistics	29.4015	WT	SYP2GFP	4540000	154414
1	1	LP	Herm	DLW118	2021_07_22_DLW118_20C_herm_01002_Statistics	20.3083	WT	SYP2GFP	2680000	131966
1	1	Dip/Diak	Herm	DLW118	2021_07_22_DLW118_20C_herm_01002_Statistics	13.5988	WT	SYP2GFP	2290000	168397
0.0175757	-0.0845382	TZ	Herm	DLW118	2021_07_22_DLW118_20C_herm_01003_Statistics	12.7111	WT	SYP2GFP	1650000	129808
0.066063	-0.031011	TZ	Herm	DLW118	2021_07_22_DLW118_20C_herm_01003_Statistics	12.693	WT	SYP2GFP	1700000	133932
0.0736613	-0.022623	TZ	Herm	DLW118	2021_07_22_DLW118_20C_herm_01003_Statistics	11.2384	WT	SYP2GFP	1600000	142369
0.0634927	-0.0338485	TZ	Herm	DLW118	2021_07_22_DLW118_20C_herm_01003_Statistics	18.8116	WT	SYP2GFP	2620000	139276
0.0394257	-0.060417	TZ	Herm	DLW118	2021_07_22_DLW118_20C_herm_01003_Statistics	15.5275	WT	SYP2GFP	2070000	133312
0.0575977	-0.0403562	TZ	Herm	DLW118	2021_07_22_DLW118_20C_herm_01003_Statistics	14.6882	WT	SYP2GFP	2150000	146376
0.0354276	-0.0648307	TZ	Herm	DLW118	2021_07_22_DLW118_20C_herm_01003_Statistics	13.1217	WT	SYP2GFP	1780000	135653
0.0367752	-0.0633431	TZ	Herm	DLW118	2021_07_22_DLW118_20C_herm_01003_Statistics	13.9623	WT	SYP2GFP	1950000	139662
0.0554467	-0.0427308	TZ	Herm	DLW118	2021_07_22_DLW118_20C_herm_01003_Statistics	20.2389	WT	SYP2GFP	2660000	131430
0.0380587	-0.0619261	TZ	Herm	DLW118	2021_07_22_DLW118_20C_herm_01003_Statistics	12.4557	WT	SYP2GFP	1720000	138089
0.0180145	-0.0840538	TZ	Herm	DLW118	2021_07_22_DLW118_20C_herm_01003_Statistics	15.3146	WT	SYP2GFP	1940000	126677
0.0517699	-0.0467898	TZ	Herm	DLW118	2021_07_22_DLW118_20C_herm_01003_Statistics	15.5855	WT	SYP2GFP	1970000	126400
0.0150434	-0.0873337	TZ	Herm	DLW118	2021_07_22_DLW118_20C_herm_01003_Statistics	15.3354	WT	SYP2GFP	1950000	127157
0.053152	-0.0452641	TZ	Herm	DLW118	2021_07_22_DLW118_20C_herm_01003_Statistics	20.0253	WT	SYP2GFP	2820000	140822
0.0306114	-0.0701475	TZ	Herm	DLW118	2021_07_22_DLW118_20C_herm_01003_Statistics	16.4429	WT	SYP2GFP	2230000	135621
0.016346	-0.0858957	TZ	Herm	DLW118	2021_07_22_DLW118_20C_herm_01003_Statistics	14.6518	WT	SYP2GFP	1860000	126947
0.0618985	-0.0356085	TZ	Herm	DLW118	2021_07_22_DLW118_20C_herm_01003_Statistics	18.4505	WT	SYP2GFP	2760000	149589
0.0865173	-0.00843079	TZ	Herm	DLW118	2021_07_22_DLW118_20C_herm_01003_Statistics	12.8749	WT	SYP2GFP	1830000	142137
0.0543141	-0.0439812	TZ	Herm	DLW118	2021_07_22_DLW118_20C_herm_01003_Statistics	14.4338	WT	SYP2GFP	2110000	146185
0.0546046	-0.0436605	TZ	Herm	DLW118	2021_07_22_DLW118_20C_herm_01003_Statistics	18.5938	WT	SYP2GFP	2640000	141983
0.113082	0.020895	EP	Herm	DLW118	2021_07_22_DLW118_20C_herm_01003_Statistics	21.4763	WT	SYP2GFP	3130000	145742
0.0946151	0.000508772	EP	Herm	DLW118	2021_07_22_DLW118_20C_herm_01003_Statistics	14.0453	WT	SYP2GFP	2020000	143820
0.101885	0.00853431	EP	Herm	DLW118	2021_07_22_DLW118_20C_herm_01003_Statistics	20.0937	WT	SYP2GFP	3130000	155770
0.139559	0.0501247	EP	Herm	DLW118	2021_07_22_DLW118_20C_herm_01003_Statistics	24.1189	WT	SYP2GFP	3520000	145944
0.124869	0.0339067	EP	Herm	DLW118	2021_07_22_DLW118_20C_herm_01003_Statistics	19.166	WT	SYP2GFP	3010000	157049
0.12702	0.0362818	EP	Herm	DLW118	2021_07_22_DLW118_20C_herm_01003_Statistics	24.7214	WT	SYP2GFP	3820000	154522
0.109661	0.0171187	EP	Herm	DLW118	2021_07_22_DLW118_20C_herm_01003_Statistics	18.662	WT	SYP2GFP	2710000	145215
0.144515	0.0555949	EP	Herm	DLW118	2021_07_22_DLW118_20C_herm_01003_Statistics	23.5961	WT	SYP2GFP	3810000	161467
0.161085	0.0738874	EP	Herm	DLW118	2021_07_22_DLW118_20C_herm_01003_Statistics	20.8365	WT	SYP2GFP	3100000	148777
0.167903	0.0814143	EP	Herm	DLW118	2021_07_22_DLW118_20C_herm_01003_Statistics	32.3062	WT	SYP2GFP	4520000	139911
0.192832	0.108934	EP	Herm	DLW118	2021_07_22_DLW118_20C_herm_01003_Statistics	13.8032	WT	SYP2GFP	1780000	128956
0.172463	0.0864487	EP	Herm	DLW118	2021_07_22_DLW118_20C_herm_01003_Statistics	30.3881	WT	SYP2GFP	4690000	154337
0.18241	0.0974286	EP	Herm	DLW118	2021_07_22_DLW118_20C_herm_01003_Statistics	27.6125	WT	SYP2GFP	4210000	152467
0.192816	0.108916	EP	Herm	DLW118	2021_07_22_DLW118_20C_herm_01003_Statistics	29.171	WT	SYP2GFP	4280000	146721
0.219597	0.138481	EP	Herm	DLW118	2021_07_22_DLW118_20C_herm_01003_Statistics	28.2199	WT	SYP2GFP	3920000	138909
0.201598	0.118611	EP	Herm	DLW118	2021_07_22_DLW118_20C_herm_01003_Statistics	18.2205	WT	SYP2GFP	2500000	137208
0.167251	0.0806942	EP	Herm	DLW118	2021_07_22_DLW118_20C_herm_01003_Statistics	21.8907	WT	SYP2GFP	3380000	154403
0.199814	0.116643	EP	Herm	DLW118	2021_07_22_DLW118_20C_herm_01003_Statistics	26.6114	WT	SYP2GFP	4130000	155197
0.20946	0.127291	EP	Herm	DLW118	2021_07_22_DLW118_20C_herm_01003_Statistics	29.4963	WT	SYP2GFP	4340000	147137
0.222677	0.141882	EP	Herm	DLW118	2021_07_22_DLW118_20C_herm_01003_Statistics	28.4724	WT	SYP2GFP	4180000	146809
0.19424	0.110489	EP	Herm	DLW118	2021_07_22_DLW118_20C_herm_01003_Statistics	30.7051	WT	SYP2GFP	4800000	156326
0.229655	0.149585	EP	Herm	DLW118	2021_07_22_DLW118_20C_herm_01003_Statistics	25.84	WT	SYP2GFP	3740000	144737
0.1809	0.0957624	EP	Herm	DLW118	2021_07_22_DLW118_20C_herm_01003_Statistics	24.1553	WT	SYP2GFP	3710000	153589
0.252531	0.174838	EP	Herm	DLW118	2021_07_22_DLW118_20C_herm_01003_Statistics	27.9545	WT	SYP2GFP	4090000	146309
0.236223	0.156836	EP	Herm	DLW118	2021_07_22_DLW118_20C_herm_01003_Statistics	25.1092	WT	SYP2GFP	3780000	150542
0.222847	0.142069	EP	Herm	DLW118	2021_07_22_DLW118_20C_herm_01003_Statistics	30.4114	WT	SYP2GFP	4720000	155205
0.259156	0.182152	EP	Herm	DLW118	2021_07_22_DLW118_20C_herm_01003_Statistics	25.7278	WT	SYP2GFP	3870000	150421
0.263184	0.186599	EP	Herm	DLW118	2021_07_22_DLW118_20C_herm_01003_Statistics	21.4065	WT	SYP2GFP	3320000	155093
0.249179	0.171138	EP	Herm	DLW118	2021_07_22_DLW118_20C_herm_01003_Statistics	29.2696	WT	SYP2GFP	4380000	149643
0.270399	0.194563	EP	Herm	DLW118	2021_07_22_DLW118_20C_herm_01003_Statistics	24.0454	WT	SYP2GFP	3480000	144726
0.279401	0.204501	EP	Herm	DLW118	2021_07_22_DLW118_20C_herm_01003_Statistics	23.4001	WT	SYP2GFP	3380000	144444
0.286296	0.212113	EP	Herm	DLW118	2021_07_22_DLW118_20C_herm_01003_Statistics	28.6098	WT	SYP2GFP	4370000	152745
0.281408	0.206717	EP	Herm	DLW118	2021_07_22_DLW118_20C_herm_01003_Statistics	22.6294	WT	SYP2GFP	3460000	152898
0.278567	0.203581	EP	Herm	DLW118	2021_07_22_DLW118_20C_herm_01003_Statistics	28.3745	WT	SYP2GFP	4360000	153659
0.299483	0.22667	EP	Herm	DLW118	2021_07_22_DLW118_20C_herm_01003_Statistics	24.193	WT	SYP2GFP	3600000	148803
0.307111	0.235092	EP	Herm	DLW118	2021_07_22_DLW118_20C_herm_01003_Statistics	24.1038	WT	SYP2GFP	3550000	147280
0.275318	0.199994	EP	Herm	DLW118	2021_07_22_DLW118_20C_herm_01003_Statistics	28.2295	WT	SYP2GFP	4310000	152677
0.357315	0.290514	EP	Herm	DLW118	2021_07_22_DLW118_20C_herm_01003_Statistics	33.5469	WT	SYP2GFP	5080000	151430
0.33682	0.267888	EP	Herm	DLW118	2021_07_22_DLW118_20C_herm_01003_Statistics	31.4812	WT	SYP2GFP	4760000	151201
0.354208	0.287084	EP	Herm	DLW118	2021_07_22_DLW118_20C_herm_01003_Statistics	34.2274	WT	SYP2GFP	5540000	161859
0.427746	0.368266	MP	Herm	DLW118	2021_07_22_DLW118_20C_herm_01003_Statistics	23.6821	WT	SYP2GFP	3430000	144835
0.392463	0.329316	EP	Herm	DLW118	2021_07_22_DLW118_20C_herm_01003_Statistics	24.8648	WT	SYP2GFP	3780000	152022
0.3617	0.295355	EP	Herm	DLW118	2021_07_22_DLW118_20C_herm_01003_Statistics	33.8067	WT	SYP2GFP	5140000	152041
0.407207	0.345591	MP	Herm	DLW118	2021_07_22_DLW118_20C_herm_01003_Statistics	36.9856	WT	SYP2GFP	5570000	150599
0.373707	0.308609	EP	Herm	DLW118	2021_07_22_DLW118_20C_herm_01003_Statistics	31.2806	WT	SYP2GFP	4640000	148335
0.33462	0.26546	EP	Herm	DLW118	2021_07_22_DLW118_20C_herm_01003_Statistics	33.0394	WT	SYP2GFP	5290000	160112
0.374875	0.309899	EP	Herm	DLW118	2021_07_22_DLW118_20C_herm_01003_Statistics	47.4912	WT	SYP2GFP	6780000	142763
0.435137	0.376425	MP	Herm	DLW118	2021_07_22_DLW118_20C_herm_01003_Statistics	33.2964	WT	SYP2GFP	5950000	178698
0.367229	0.301458	EP	Herm	DLW118	2021_07_22_DLW118_20C_herm_01003_Statistics	16.4414	WT	SYP2GFP	2560000	155705
0.355871	0.28892	EP	Herm	DLW118	2021_07_22_DLW118_20C_herm_01003_Statistics	15.8928	WT	SYP2GFP	2470000	155416
0.395819	0.33302	EP	Herm	DLW118	2021_07_22_DLW118_20C_herm_01003_Statistics	28.9073	WT	SYP2GFP	4450000	153940
0.407471	0.345883	MP	Herm	DLW118	2021_07_22_DLW118_20C_herm_01003_Statistics	38.8537	WT	SYP2GFP	6090000	156742
0.383272	0.319169	EP	Herm	DLW118	2021_07_22_DLW118_20C_herm_01003_Statistics	33.5248	WT	SYP2GFP	5280000	157495
0.419194	0.358825	MP	Herm	DLW118	2021_07_22_DLW118_20C_herm_01003_Statistics	36.4006	WT	SYP2GFP	6160000	169228
0.435674	0.377017	MP	Herm	DLW118	2021_07_22_DLW118_20C_herm_01003_Statistics	35.0215	WT	SYP2GFP	5950000	169896
0.427951	0.368492	MP	Herm	DLW118	2021_07_22_DLW118_20C_herm_01003_Statistics	35.4811	WT	SYP2GFP	5590000	157549
0.412243	0.351151	MP	Herm	DLW118	2021_07_22_DLW118_20C_herm_01003_Statistics	30.8312	WT	SYP2GFP	4570000	148226
0.450685	0.393589	MP	Herm	DLW118	2021_07_22_DLW118_20C_herm_01003_Statistics	28.7339	WT	SYP2GFP	3970000	138164
0.443843	0.386035	MP	Herm	DLW118	2021_07_22_DLW118_20C_herm_01003_Statistics	40.788	WT	SYP2GFP	6720000	164754
0.448481	0.391155	MP	Herm	DLW118	2021_07_22_DLW118_20C_herm_01003_Statistics	28.3552	WT	SYP2GFP	3810000	134367
0.458535	0.402254	MP	Herm	DLW118	2021_07_22_DLW118_20C_herm_01003_Statistics	33.9361	WT	SYP2GFP	5100000	150282
0.467563	0.412221	MP	Herm	DLW118	2021_07_22_DLW118_20C_herm_01003_Statistics	20.5295	WT	SYP2GFP	2830000	137850
0.479001	0.424848	MP	Herm	DLW118	2021_07_22_DLW118_20C_herm_01003_Statistics	15.1718	WT	SYP2GFP	2130000	140392
0.49163	0.43879	MP	Herm	DLW118	2021_07_22_DLW118_20C_herm_01003_Statistics	14.5153	WT	SYP2GFP	2040000	140541
0.494648	0.442122	MP	Herm	DLW118	2021_07_22_DLW118_20C_herm_01003_Statistics	26.801	WT	SYP2GFP	3750000	139920
0.521822	0.47212	MP	Herm	DLW118	2021_07_22_DLW118_20C_herm_01003_Statistics	22.2046	WT	SYP2GFP	2920000	131504
0.504329	0.452808	MP	Herm	DLW118	2021_07_22_DLW118_20C_herm_01003_Statistics	29.718	WT	SYP2GFP	4180000	140655
0.528905	0.479939	MP	Herm	DLW118	2021_07_22_DLW118_20C_herm_01003_Statistics	23.627	WT	SYP2GFP	3150000	133322
0.520353	0.470498	MP	Herm	DLW118	2021_07_22_DLW118_20C_herm_01003_Statistics	27.6622	WT	SYP2GFP	3850000	139179
0.55267	0.506175	MP	Herm	DLW118	2021_07_22_DLW118_20C_herm_01003_Statistics	25.2755	WT	SYP2GFP	3470000	137287
0.537047	0.488927	MP	Herm	DLW118	2021_07_22_DLW118_20C_herm_01003_Statistics	23.7623	WT	SYP2GFP	3320000	139717
0.572418	0.527975	MP	Herm	DLW118	2021_07_22_DLW118_20C_herm_01003_Statistics	28.5041	WT	SYP2GFP	3880000	136121
0.590444	0.547874	MP	Herm	DLW118	2021_07_22_DLW118_20C_herm_01003_Statistics	22.0379	WT	SYP2GFP	3030000	137490
0.608358	0.567651	MP	Herm	DLW118	2021_07_22_DLW118_20C_herm_01003_Statistics	29.7099	WT	SYP2GFP	3990000	134299
0.6201	0.580613	MP	Herm	DLW118	2021_07_22_DLW118_20C_herm_01003_Statistics	26.9361	WT	SYP2GFP	3790000	140703
0.657535	0.621939	MP	Herm	DLW118	2021_07_22_DLW118_20C_herm_01003_Statistics	28.9962	WT	SYP2GFP	3860000	133121
0.604062	0.562908	MP	Herm	DLW118	2021_07_22_DLW118_20C_herm_01003_Statistics	33.4323	WT	SYP2GFP	4720000	141181
0.639166	0.60166	MP	Herm	DLW118	2021_07_22_DLW118_20C_herm_01003_Statistics	32.6094	WT	SYP2GFP	4530000	138917
0.652704	0.616605	MP	Herm	DLW118	2021_07_22_DLW118_20C_herm_01003_Statistics	33.6737	WT	SYP2GFP	4810000	142841
0.6284	0.589775	MP	Herm	DLW118	2021_07_22_DLW118_20C_herm_01003_Statistics	35.6713	WT	SYP2GFP	5020000	140729
0.655057	0.619204	MP	Herm	DLW118	2021_07_22_DLW118_20C_herm_01003_Statistics	36.1981	WT	SYP2GFP	5190000	143378
0.641999	0.604788	MP	Herm	DLW118	2021_07_22_DLW118_20C_herm_01003_Statistics	16.2188	WT	SYP2GFP	2290000	141194
0.628579	0.589973	MP	Herm	DLW118	2021_07_22_DLW118_20C_herm_01003_Statistics	12.7668	WT	SYP2GFP	1780000	139424
0.673268	0.639307	MP	Herm	DLW118	2021_07_22_DLW118_20C_herm_01003_Statistics	36.7718	WT	SYP2GFP	5340000	145220
0.7703	0.746425	LP	Herm	DLW118	2021_07_22_DLW118_20C_herm_01003_Statistics	25.6359	WT	SYP2GFP	3520000	137307
0.692556	0.6606	MP	Herm	DLW118	2021_07_22_DLW118_20C_herm_01003_Statistics	12.4689	WT	SYP2GFP	1700000	136339
0.740234	0.713233	LP	Herm	DLW118	2021_07_22_DLW118_20C_herm_01003_Statistics	35.1187	WT	SYP2GFP	4720000	134401
0.751744	0.72594	LP	Herm	DLW118	2021_07_22_DLW118_20C_herm_01003_Statistics	29.7317	WT	SYP2GFP	4110000	138236
0.698482	0.667142	LP	Herm	DLW118	2021_07_22_DLW118_20C_herm_01003_Statistics	18.9606	WT	SYP2GFP	2630000	138709
0.786283	0.764069	LP	Herm	DLW118	2021_07_22_DLW118_20C_herm_01003_Statistics	32.0543	WT	SYP2GFP	4520000	141011
0.706262	0.67573	LP	Herm	DLW118	2021_07_22_DLW118_20C_herm_01003_Statistics	44.019	WT	SYP2GFP	6650000	151071
0.729616	0.701513	LP	Herm	DLW118	2021_07_22_DLW118_20C_herm_01003_Statistics	36.7802	WT	SYP2GFP	5130000	139477
0.769477	0.745516	LP	Herm	DLW118	2021_07_22_DLW118_20C_herm_01003_Statistics	39.4015	WT	SYP2GFP	5530000	140350
0.719303	0.690127	LP	Herm	DLW118	2021_07_22_DLW118_20C_herm_01003_Statistics	37.6946	WT	SYP2GFP	5330000	141400
0.789178	0.767265	LP	Herm	DLW118	2021_07_22_DLW118_20C_herm_01003_Statistics	43.3637	WT	SYP2GFP	6190000	142746
0.804271	0.783927	LP	Herm	DLW118	2021_07_22_DLW118_20C_herm_01003_Statistics	34.7892	WT	SYP2GFP	5020000	144298
0.865733	0.851777	LP	Herm	DLW118	2021_07_22_DLW118_20C_herm_01003_Statistics	33.8416	WT	SYP2GFP	4970000	146861
0.826895	0.808903	LP	Herm	DLW118	2021_07_22_DLW118_20C_herm_01003_Statistics	12.7107	WT	SYP2GFP	1730000	136106
0.814172	0.794857	LP	Herm	DLW118	2021_07_22_DLW118_20C_herm_01003_Statistics	18.5648	WT	SYP2GFP	2620000	141127
0.860175	0.845642	LP	Herm	DLW118	2021_07_22_DLW118_20C_herm_01003_Statistics	16.9382	WT	SYP2GFP	2420000	142872
0.800404	0.779657	LP	Herm	DLW118	2021_07_22_DLW118_20C_herm_01003_Statistics	18.1861	WT	SYP2GFP	2590000	142416
0.847925	0.832118	LP	Herm	DLW118	2021_07_22_DLW118_20C_herm_01003_Statistics	15.434	WT	SYP2GFP	2160000	139951
0.892009	0.880784	LP	Herm	DLW118	2021_07_22_DLW118_20C_herm_01003_Statistics	31.7429	WT	SYP2GFP	4440000	139874
0.813847	0.794498	LP	Herm	DLW118	2021_07_22_DLW118_20C_herm_01003_Statistics	22.7585	WT	SYP2GFP	3240000	142364
0.884046	0.871994	LP	Herm	DLW118	2021_07_22_DLW118_20C_herm_01003_Statistics	29.8363	WT	SYP2GFP	4030000	135070
0.802126	0.781559	LP	Herm	DLW118	2021_07_22_DLW118_20C_herm_01003_Statistics	38.3954	WT	SYP2GFP	5420000	141163
0.936553	0.929958	LP	Herm	DLW118	2021_07_22_DLW118_20C_herm_01003_Statistics	31.9288	WT	SYP2GFP	4170000	130603
0.960237	0.956104	LP	Herm	DLW118	2021_07_22_DLW118_20C_herm_01003_Statistics	38.1604	WT	SYP2GFP	5400000	141508
0.89592	0.885102	LP	Herm	DLW118	2021_07_22_DLW118_20C_herm_01003_Statistics	46.8125	WT	SYP2GFP	6300000	134579
0.918174	0.909669	LP	Herm	DLW118	2021_07_22_DLW118_20C_herm_01003_Statistics	38.9104	WT	SYP2GFP	5550000	142635
0.841228	0.824725	LP	Herm	DLW118	2021_07_22_DLW118_20C_herm_01003_Statistics	37.1977	WT	SYP2GFP	4940000	132804
0.944388	0.938607	LP	Herm	DLW118	2021_07_22_DLW118_20C_herm_01003_Statistics	32.5138	WT	SYP2GFP	4260000	131021
0.881883	0.869606	LP	Herm	DLW118	2021_07_22_DLW118_20C_herm_01003_Statistics	41.5823	WT	SYP2GFP	5460000	131306
0.97067	0.967621	LP	Herm	DLW118	2021_07_22_DLW118_20C_herm_01003_Statistics	37.1489	WT	SYP2GFP	4920000	132440
0.986438	0.985029	LP	Herm	DLW118	2021_07_22_DLW118_20C_herm_01003_Statistics	36.961	WT	SYP2GFP	5100000	137983
0.161233	-0.0134924	TZ	Herm	DLW118	2021_07_22_DLW118_20C_herm_01004_Statistics	17.7702	WT	SYP2GFP	2440000	137309
0.124714	-0.0576191	TZ	Herm	DLW118	2021_07_22_DLW118_20C_herm_01004_Statistics	24.0288	WT	SYP2GFP	3050000	126931
0.15659	-0.019103	TZ	Herm	DLW118	2021_07_22_DLW118_20C_herm_01004_Statistics	18.075	WT	SYP2GFP	2670000	147718
0.130447	-0.0506917	TZ	Herm	DLW118	2021_07_22_DLW118_20C_herm_01004_Statistics	19.2796	WT	SYP2GFP	2600000	134858
0.100633	-0.0867161	TZ	Herm	DLW118	2021_07_22_DLW118_20C_herm_01004_Statistics	23.028	WT	SYP2GFP	3010000	130710
0.13206	-0.0487426	TZ	Herm	DLW118	2021_07_22_DLW118_20C_herm_01004_Statistics	27.4163	WT	SYP2GFP	3860000	140792
0.131844	-0.0490045	TZ	Herm	DLW118	2021_07_22_DLW118_20C_herm_01004_Statistics	28.3145	WT	SYP2GFP	3910000	138092
0.144025	-0.0342848	TZ	Herm	DLW118	2021_07_22_DLW118_20C_herm_01004_Statistics	30.15	WT	SYP2GFP	4030000	133665
0.105828	-0.0804399	TZ	Herm	DLW118	2021_07_22_DLW118_20C_herm_01004_Statistics	24.7138	WT	SYP2GFP	3470000	140407
0.128937	-0.052516	TZ	Herm	DLW118	2021_07_22_DLW118_20C_herm_01004_Statistics	16.6601	WT	SYP2GFP	2240000	134453
0.160565	-0.0143003	TZ	Herm	DLW118	2021_07_22_DLW118_20C_herm_01004_Statistics	28.4075	WT	SYP2GFP	4030000	141864
0.0576486	-0.138655	TZ	Herm	DLW118	2021_07_22_DLW118_20C_herm_01004_Statistics	24.4923	WT	SYP2GFP	3340000	136369
0.0978677	-0.0900579	TZ	Herm	DLW118	2021_07_22_DLW118_20C_herm_01004_Statistics	26.9189	WT	SYP2GFP	3710000	137821
0.0770401	-0.115224	TZ	Herm	DLW118	2021_07_22_DLW118_20C_herm_01004_Statistics	22.0572	WT	SYP2GFP	3190000	144624
0.0576889	-0.138606	TZ	Herm	DLW118	2021_07_22_DLW118_20C_herm_01004_Statistics	22.4738	WT	SYP2GFP	2620000	116580
0.0769634	-0.115317	TZ	Herm	DLW118	2021_07_22_DLW118_20C_herm_01004_Statistics	25.8514	WT	SYP2GFP	3680000	142352
0.0687954	-0.125186	TZ	Herm	DLW118	2021_07_22_DLW118_20C_herm_01004_Statistics	18.5996	WT	SYP2GFP	2560000	137637
0.0501423	-0.147725	TZ	Herm	DLW118	2021_07_22_DLW118_20C_herm_01004_Statistics	18.2546	WT	SYP2GFP	2650000	145169
0.0837637	-0.1071	TZ	Herm	DLW118	2021_07_22_DLW118_20C_herm_01004_Statistics	29.1373	WT	SYP2GFP	3970000	136251
0.072234	-0.121031	TZ	Herm	DLW118	2021_07_22_DLW118_20C_herm_01004_Statistics	18.5511	WT	SYP2GFP	2420000	130450
0.0726558	-0.120522	TZ	Herm	DLW118	2021_07_22_DLW118_20C_herm_01004_Statistics	19.4324	WT	SYP2GFP	2790000	143575
0.0478876	-0.15045	TZ	Herm	DLW118	2021_07_22_DLW118_20C_herm_01004_Statistics	16.736	WT	SYP2GFP	2170000	129661
0.027838	-0.174676	TZ	Herm	DLW118	2021_07_22_DLW118_20C_herm_01004_Statistics	19.4818	WT	SYP2GFP	2790000	143211
0.0429089	-0.156465	TZ	Herm	DLW118	2021_07_22_DLW118_20C_herm_01004_Statistics	17.4421	WT	SYP2GFP	2250000	128998
0.0175026	-0.187164	TZ	Herm	DLW118	2021_07_22_DLW118_20C_herm_01004_Statistics	20.6071	WT	SYP2GFP	2700000	131023
0.365619	0.233469	EP	Herm	DLW118	2021_07_22_DLW118_20C_herm_01004_Statistics	30.5017	WT	SYP2GFP	4650000	152451
0.321172	0.179764	EP	Herm	DLW118	2021_07_22_DLW118_20C_herm_01004_Statistics	32.7382	WT	SYP2GFP	5470000	167083
0.343807	0.207114	EP	Herm	DLW118	2021_07_22_DLW118_20C_herm_01004_Statistics	39.416	WT	SYP2GFP	6450000	163639
0.357594	0.223773	EP	Herm	DLW118	2021_07_22_DLW118_20C_herm_01004_Statistics	30.9116	WT	SYP2GFP	5100000	164987
0.336082	0.197779	EP	Herm	DLW118	2021_07_22_DLW118_20C_herm_01004_Statistics	35.4384	WT	SYP2GFP	5420000	152941
0.326393	0.186073	EP	Herm	DLW118	2021_07_22_DLW118_20C_herm_01004_Statistics	31.1931	WT	SYP2GFP	4670000	149713
0.274642	0.123541	EP	Herm	DLW118	2021_07_22_DLW118_20C_herm_01004_Statistics	36.3937	WT	SYP2GFP	5440000	149476
0.309656	0.165848	EP	Herm	DLW118	2021_07_22_DLW118_20C_herm_01004_Statistics	33.9372	WT	SYP2GFP	5280000	155581
0.343279	0.206476	EP	Herm	DLW118	2021_07_22_DLW118_20C_herm_01004_Statistics	31.5835	WT	SYP2GFP	4590000	145329
0.360172	0.226888	EP	Herm	DLW118	2021_07_22_DLW118_20C_herm_01004_Statistics	29.2076	WT	SYP2GFP	4190000	143456
0.321933	0.180683	EP	Herm	DLW118	2021_07_22_DLW118_20C_herm_01004_Statistics	35.0479	WT	SYP2GFP	5770000	164632
0.309338	0.165465	EP	Herm	DLW118	2021_07_22_DLW118_20C_herm_01004_Statistics	31.7572	WT	SYP2GFP	4850000	152721
0.339203	0.20155	EP	Herm	DLW118	2021_07_22_DLW118_20C_herm_01004_Statistics	25.3088	WT	SYP2GFP	4160000	164370
0.351051	0.215866	EP	Herm	DLW118	2021_07_22_DLW118_20C_herm_01004_Statistics	31.7996	WT	SYP2GFP	5300000	166669
0.252172	0.0963896	EP	Herm	DLW118	2021_07_22_DLW118_20C_herm_01004_Statistics	34.5909	WT	SYP2GFP	5290000	152930
0.27151	0.119757	EP	Herm	DLW118	2021_07_22_DLW118_20C_herm_01004_Statistics	33.1944	WT	SYP2GFP	5060000	152435
0.287737	0.139364	EP	Herm	DLW118	2021_07_22_DLW118_20C_herm_01004_Statistics	31.2902	WT	SYP2GFP	4570000	146052
0.238473	0.0798374	EP	Herm	DLW118	2021_07_22_DLW118_20C_herm_01004_Statistics	36.5064	WT	SYP2GFP	5740000	157233
0.259305	0.105008	EP	Herm	DLW118	2021_07_22_DLW118_20C_herm_01004_Statistics	33.1841	WT	SYP2GFP	5400000	162729
0.297971	0.151729	EP	Herm	DLW118	2021_07_22_DLW118_20C_herm_01004_Statistics	23.8314	WT	SYP2GFP	3220000	135116
0.280612	0.130754	EP	Herm	DLW118	2021_07_22_DLW118_20C_herm_01004_Statistics	37.0054	WT	SYP2GFP	5730000	154842
0.312708	0.169537	EP	Herm	DLW118	2021_07_22_DLW118_20C_herm_01004_Statistics	29.1234	WT	SYP2GFP	4410000	151425
0.30317	0.158011	EP	Herm	DLW118	2021_07_22_DLW118_20C_herm_01004_Statistics	34.3881	WT	SYP2GFP	5270000	153251
0.28965	0.141676	EP	Herm	DLW118	2021_07_22_DLW118_20C_herm_01004_Statistics	34.1662	WT	SYP2GFP	5280000	154539
0.226308	0.0651386	EP	Herm	DLW118	2021_07_22_DLW118_20C_herm_01004_Statistics	21.1023	WT	SYP2GFP	3050000	144534
0.214421	0.0507747	EP	Herm	DLW118	2021_07_22_DLW118_20C_herm_01004_Statistics	16.5364	WT	SYP2GFP	2640000	159648
0.241285	0.0832347	EP	Herm	DLW118	2021_07_22_DLW118_20C_herm_01004_Statistics	31.93	WT	SYP2GFP	4350000	136236
0.202616	0.0365106	EP	Herm	DLW118	2021_07_22_DLW118_20C_herm_01004_Statistics	32.686	WT	SYP2GFP	5110000	156336
0.179724	0.00885042	EP	Herm	DLW118	2021_07_22_DLW118_20C_herm_01004_Statistics	26.6314	WT	SYP2GFP	3360000	126167
0.224503	0.0629576	EP	Herm	DLW118	2021_07_22_DLW118_20C_herm_01004_Statistics	23.3652	WT	SYP2GFP	3560000	152363
0.243575	0.0860019	EP	Herm	DLW118	2021_07_22_DLW118_20C_herm_01004_Statistics	22.2703	WT	SYP2GFP	3230000	145036
0.257043	0.102276	EP	Herm	DLW118	2021_07_22_DLW118_20C_herm_01004_Statistics	22.3492	WT	SYP2GFP	2970000	132891
0.271154	0.119326	EP	Herm	DLW118	2021_07_22_DLW118_20C_herm_01004_Statistics	31.0759	WT	SYP2GFP	4400000	141589
0.231068	0.0708894	EP	Herm	DLW118	2021_07_22_DLW118_20C_herm_01004_Statistics	33.6151	WT	SYP2GFP	5580000	165997
0.186003	0.0164375	EP	Herm	DLW118	2021_07_22_DLW118_20C_herm_01004_Statistics	20.0167	WT	SYP2GFP	2870000	143380
0.211585	0.0473483	EP	Herm	DLW118	2021_07_22_DLW118_20C_herm_01004_Statistics	16.9679	WT	SYP2GFP	2320000	136729
0.197377	0.0301801	EP	Herm	DLW118	2021_07_22_DLW118_20C_herm_01004_Statistics	27.9978	WT	SYP2GFP	4130000	147512
0.181188	0.0106188	EP	Herm	DLW118	2021_07_22_DLW118_20C_herm_01004_Statistics	30.2308	WT	SYP2GFP	4240000	140254
0.178174	0.00697738	EP	Herm	DLW118	2021_07_22_DLW118_20C_herm_01004_Statistics	29.0986	WT	SYP2GFP	3900000	134027
0.19807	0.0310172	EP	Herm	DLW118	2021_07_22_DLW118_20C_herm_01004_Statistics	27.2703	WT	SYP2GFP	3730000	136779
0.172884	0.000584871	EP	Herm	DLW118	2021_07_22_DLW118_20C_herm_01004_Statistics	22.1891	WT	SYP2GFP	3320000	149623
0.194581	0.026802	EP	Herm	DLW118	2021_07_22_DLW118_20C_herm_01004_Statistics	21.1337	WT	SYP2GFP	2870000	135802
0.473013	0.363235	MP	Herm	DLW118	2021_07_22_DLW118_20C_herm_01004_Statistics	38.1677	WT	SYP2GFP	5690000	149079
0.466376	0.355216	MP	Herm	DLW118	2021_07_22_DLW118_20C_herm_01004_Statistics	28.6757	WT	SYP2GFP	4360000	152045
0.501335	0.397457	MP	Herm	DLW118	2021_07_22_DLW118_20C_herm_01004_Statistics	30.6323	WT	SYP2GFP	4270000	139395
0.501858	0.398089	MP	Herm	DLW118	2021_07_22_DLW118_20C_herm_01004_Statistics	22.0956	WT	SYP2GFP	2980000	134868
0.498477	0.394004	MP	Herm	DLW118	2021_07_22_DLW118_20C_herm_01004_Statistics	47.2629	WT	SYP2GFP	8030000	169901
0.4082	0.28492	EP	Herm	DLW118	2021_07_22_DLW118_20C_herm_01004_Statistics	27.0627	WT	SYP2GFP	4380000	161846
0.445328	0.329782	EP	Herm	DLW118	2021_07_22_DLW118_20C_herm_01004_Statistics	28.6307	WT	SYP2GFP	4110000	143552
0.475746	0.366537	MP	Herm	DLW118	2021_07_22_DLW118_20C_herm_01004_Statistics	23.3786	WT	SYP2GFP	2990000	127895
0.474618	0.365175	MP	Herm	DLW118	2021_07_22_DLW118_20C_herm_01004_Statistics	34.1358	WT	SYP2GFP	4740000	138857
0.403677	0.279455	EP	Herm	DLW118	2021_07_22_DLW118_20C_herm_01004_Statistics	34.0292	WT	SYP2GFP	5300000	155749
0.383085	0.254574	EP	Herm	DLW118	2021_07_22_DLW118_20C_herm_01004_Statistics	35.0621	WT	SYP2GFP	5830000	166276
0.420662	0.299979	EP	Herm	DLW118	2021_07_22_DLW118_20C_herm_01004_Statistics	47.6287	WT	SYP2GFP	8440000	177204
0.406893	0.283342	EP	Herm	DLW118	2021_07_22_DLW118_20C_herm_01004_Statistics	26.4511	WT	SYP2GFP	4240000	160296
0.416959	0.295504	EP	Herm	DLW118	2021_07_22_DLW118_20C_herm_01004_Statistics	36.4914	WT	SYP2GFP	5700000	156201
0.375601	0.245531	EP	Herm	DLW118	2021_07_22_DLW118_20C_herm_01004_Statistics	29.2243	WT	SYP2GFP	4370000	149533
0.439858	0.323173	EP	Herm	DLW118	2021_07_22_DLW118_20C_herm_01004_Statistics	22.9222	WT	SYP2GFP	2990000	130441
0.416308	0.294718	EP	Herm	DLW118	2021_07_22_DLW118_20C_herm_01004_Statistics	38.8967	WT	SYP2GFP	6370000	163767
0.37291	0.242279	EP	Herm	DLW118	2021_07_22_DLW118_20C_herm_01004_Statistics	36.5085	WT	SYP2GFP	6360000	174206
0.383695	0.255311	EP	Herm	DLW118	2021_07_22_DLW118_20C_herm_01004_Statistics	32.84	WT	SYP2GFP	5020000	152862
0.371129	0.240128	EP	Herm	DLW118	2021_07_22_DLW118_20C_herm_01004_Statistics	31.2453	WT	SYP2GFP	5290000	169305
0.392138	0.265513	EP	Herm	DLW118	2021_07_22_DLW118_20C_herm_01004_Statistics	31.5797	WT	SYP2GFP	4910000	155480
0.38244	0.253794	EP	Herm	DLW118	2021_07_22_DLW118_20C_herm_01004_Statistics	19.8993	WT	SYP2GFP	2910000	146236
0.495522	0.390433	MP	Herm	DLW118	2021_07_22_DLW118_20C_herm_01004_Statistics	25.5413	WT	SYP2GFP	3360000	131552
0.633917	0.557658	MP	Herm	DLW118	2021_07_22_DLW118_20C_herm_01004_Statistics	40.0352	WT	SYP2GFP	6180000	154364
0.635176	0.559178	MP	Herm	DLW118	2021_07_22_DLW118_20C_herm_01004_Statistics	39.2196	WT	SYP2GFP	5520000	140746
0.616021	0.536034	MP	Herm	DLW118	2021_07_22_DLW118_20C_herm_01004_Statistics	39.4596	WT	SYP2GFP	5780000	146479
0.596639	0.512614	MP	Herm	DLW118	2021_07_22_DLW118_20C_herm_01004_Statistics	34.6808	WT	SYP2GFP	5110000	147344
0.604936	0.52264	MP	Herm	DLW118	2021_07_22_DLW118_20C_herm_01004_Statistics	34.0317	WT	SYP2GFP	4740000	139282
0.634537	0.558406	MP	Herm	DLW118	2021_07_22_DLW118_20C_herm_01004_Statistics	30.4341	WT	SYP2GFP	4090000	134389
0.560077	0.468436	MP	Herm	DLW118	2021_07_22_DLW118_20C_herm_01004_Statistics	29.6103	WT	SYP2GFP	4460000	150623
0.617888	0.538289	MP	Herm	DLW118	2021_07_22_DLW118_20C_herm_01004_Statistics	31.4054	WT	SYP2GFP	4170000	132780
0.583752	0.497042	MP	Herm	DLW118	2021_07_22_DLW118_20C_herm_01004_Statistics	54.7849	WT	SYP2GFP	10700000	195309
0.551791	0.458423	MP	Herm	DLW118	2021_07_22_DLW118_20C_herm_01004_Statistics	23.6764	WT	SYP2GFP	3340000	141069
0.599469	0.516033	MP	Herm	DLW118	2021_07_22_DLW118_20C_herm_01004_Statistics	35.3902	WT	SYP2GFP	4760000	134501
0.571635	0.482401	MP	Herm	DLW118	2021_07_22_DLW118_20C_herm_01004_Statistics	34.531	WT	SYP2GFP	5130000	148562
0.560933	0.469469	MP	Herm	DLW118	2021_07_22_DLW118_20C_herm_01004_Statistics	29.6643	WT	SYP2GFP	3940000	132820
0.535379	0.438592	MP	Herm	DLW118	2021_07_22_DLW118_20C_herm_01004_Statistics	27.9704	WT	SYP2GFP	3860000	138003
0.535538	0.438784	MP	Herm	DLW118	2021_07_22_DLW118_20C_herm_01004_Statistics	28.099	WT	SYP2GFP	3920000	139507
0.523326	0.424029	MP	Herm	DLW118	2021_07_22_DLW118_20C_herm_01004_Statistics	25.9607	WT	SYP2GFP	3490000	134434
0.526452	0.427806	MP	Herm	DLW118	2021_07_22_DLW118_20C_herm_01004_Statistics	32.575	WT	SYP2GFP	4450000	136608
0.857672	0.828024	LP	Herm	DLW118	2021_07_22_DLW118_20C_herm_01004_Statistics	45.4427	WT	SYP2GFP	6600000	145238
0.839657	0.806256	LP	Herm	DLW118	2021_07_22_DLW118_20C_herm_01004_Statistics	41.2116	WT	SYP2GFP	5580000	135399
0.867588	0.840005	LP	Herm	DLW118	2021_07_22_DLW118_20C_herm_01004_Statistics	34.0545	WT	SYP2GFP	4410000	129498
0.83439	0.799892	LP	Herm	DLW118	2021_07_22_DLW118_20C_herm_01004_Statistics	33.4607	WT	SYP2GFP	4440000	132693
0.817542	0.779534	LP	Herm	DLW118	2021_07_22_DLW118_20C_herm_01004_Statistics	43.0919	WT	SYP2GFP	6030000	139933
0.818559	0.780762	LP	Herm	DLW118	2021_07_22_DLW118_20C_herm_01004_Statistics	42.0057	WT	SYP2GFP	5590000	133077
0.801428	0.760063	LP	Herm	DLW118	2021_07_22_DLW118_20C_herm_01004_Statistics	44.7622	WT	SYP2GFP	6360000	142084
0.771976	0.724476	LP	Herm	DLW118	2021_07_22_DLW118_20C_herm_01004_Statistics	44.3297	WT	SYP2GFP	6690000	150915
0.797624	0.755466	LP	Herm	DLW118	2021_07_22_DLW118_20C_herm_01004_Statistics	47.1192	WT	SYP2GFP	6550000	139009
0.758774	0.708523	LP	Herm	DLW118	2021_07_22_DLW118_20C_herm_01004_Statistics	54.8407	WT	SYP2GFP	8290000	151165
0.730097	0.673873	LP	Herm	DLW118	2021_07_22_DLW118_20C_herm_01004_Statistics	45.0507	WT	SYP2GFP	6660000	147833
0.769259	0.721192	LP	Herm	DLW118	2021_07_22_DLW118_20C_herm_01004_Statistics	47.1726	WT	SYP2GFP	6150000	130372
0.743739	0.690357	LP	Herm	DLW118	2021_07_22_DLW118_20C_herm_01004_Statistics	39.4983	WT	SYP2GFP	5340000	135196
0.735435	0.680323	LP	Herm	DLW118	2021_07_22_DLW118_20C_herm_01004_Statistics	42.3431	WT	SYP2GFP	5850000	138157
0.714633	0.655187	MP	Herm	DLW118	2021_07_22_DLW118_20C_herm_01004_Statistics	43.7237	WT	SYP2GFP	6260000	143172
0.673492	0.605476	MP	Herm	DLW118	2021_07_22_DLW118_20C_herm_01004_Statistics	44.2631	WT	SYP2GFP	6650000	150238
0.686645	0.621369	MP	Herm	DLW118	2021_07_22_DLW118_20C_herm_01004_Statistics	40.974	WT	SYP2GFP	5950000	145214
0.703435	0.641657	MP	Herm	DLW118	2021_07_22_DLW118_20C_herm_01004_Statistics	39.395	WT	SYP2GFP	5570000	141389
0.706088	0.644862	MP	Herm	DLW118	2021_07_22_DLW118_20C_herm_01004_Statistics	36.4396	WT	SYP2GFP	4880000	133920
0.679888	0.613204	MP	Herm	DLW118	2021_07_22_DLW118_20C_herm_01004_Statistics	33.5052	WT	SYP2GFP	4740000	141471
0.670352	0.601682	MP	Herm	DLW118	2021_07_22_DLW118_20C_herm_01004_Statistics	39.174	WT	SYP2GFP	5250000	134017
0.659552	0.588632	MP	Herm	DLW118	2021_07_22_DLW118_20C_herm_01004_Statistics	37.899	WT	SYP2GFP	5230000	137998
0.644126	0.569993	MP	Herm	DLW118	2021_07_22_DLW118_20C_herm_01004_Statistics	34.5003	WT	SYP2GFP	4880000	141448
0.986216	0.983345	LP	Herm	DLW118	2021_07_22_DLW118_20C_herm_01004_Statistics	28.4529	WT	SYP2GFP	4460000	156750
0.975189	0.970021	LP	Herm	DLW118	2021_07_22_DLW118_20C_herm_01004_Statistics	31.6486	WT	SYP2GFP	4830000	152613
0.967043	0.960178	LP	Herm	DLW118	2021_07_22_DLW118_20C_herm_01004_Statistics	44.9433	WT	SYP2GFP	6650000	147964
0.979728	0.975505	LP	Herm	DLW118	2021_07_22_DLW118_20C_herm_01004_Statistics	40.1384	WT	SYP2GFP	5810000	144749
0.932534	0.918481	LP	Herm	DLW118	2021_07_22_DLW118_20C_herm_01004_Statistics	40.0373	WT	SYP2GFP	5790000	144615
0.945507	0.934155	LP	Herm	DLW118	2021_07_22_DLW118_20C_herm_01004_Statistics	38.1266	WT	SYP2GFP	5410000	141896
0.913869	0.895927	LP	Herm	DLW118	2021_07_22_DLW118_20C_herm_01004_Statistics	44.3299	WT	SYP2GFP	6360000	143470
0.925683	0.910202	LP	Herm	DLW118	2021_07_22_DLW118_20C_herm_01004_Statistics	35.332	WT	SYP2GFP	4720000	133590
0.915394	0.897769	LP	Herm	DLW118	2021_07_22_DLW118_20C_herm_01004_Statistics	37.4703	WT	SYP2GFP	5060000	135040
0.90128	0.880716	LP	Herm	DLW118	2021_07_22_DLW118_20C_herm_01004_Statistics	39.6815	WT	SYP2GFP	5520000	139108
0.882321	0.857807	LP	Herm	DLW118	2021_07_22_DLW118_20C_herm_01004_Statistics	36.1049	WT	SYP2GFP	4880000	135162
0.894556	0.872591	LP	Herm	DLW118	2021_07_22_DLW118_20C_herm_01004_Statistics	32.6312	WT	SYP2GFP	4200000	128711
0.88283	0.858422	LP	Herm	DLW118	2021_07_22_DLW118_20C_herm_01004_Statistics	42.0501	WT	SYP2GFP	5610000	133412
0.0233948	-0.324478	TZ	Herm	DLW118	2021_07_22_DLW118_20C_herm_01006_Statistics	16.3096	WT	SYP2GFP	1840000	112817
0.00851727	-0.344655	TZ	Herm	DLW118	2021_07_22_DLW118_20C_herm_01006_Statistics	12.1412	WT	SYP2GFP	1270000	104603
0.0487347	-0.290112	TZ	Herm	DLW118	2021_07_22_DLW118_20C_herm_01006_Statistics	12.1482	WT	SYP2GFP	1440000	118536
0.0723876	-0.258033	TZ	Herm	DLW118	2021_07_22_DLW118_20C_herm_01006_Statistics	13.6697	WT	SYP2GFP	1480000	108269
0.0734211	-0.256632	TZ	Herm	DLW118	2021_07_22_DLW118_20C_herm_01006_Statistics	11.2706	WT	SYP2GFP	1220000	108246
0.0916894	-0.231856	TZ	Herm	DLW118	2021_07_22_DLW118_20C_herm_01006_Statistics	16.2763	WT	SYP2GFP	1900000	116734
0.0971458	-0.224456	TZ	Herm	DLW118	2021_07_22_DLW118_20C_herm_01006_Statistics	18.9788	WT	SYP2GFP	2400000	126457
0.11244	-0.203715	TZ	Herm	DLW118	2021_07_22_DLW118_20C_herm_01006_Statistics	13.4694	WT	SYP2GFP	1580000	117303
0.0997846	-0.220878	TZ	Herm	DLW118	2021_07_22_DLW118_20C_herm_01006_Statistics	22.0222	WT	SYP2GFP	2920000	132593
0.122767	-0.189709	TZ	Herm	DLW118	2021_07_22_DLW118_20C_herm_01006_Statistics	17.2573	WT	SYP2GFP	2160000	125164
0.0779976	-0.250425	TZ	Herm	DLW118	2021_07_22_DLW118_20C_herm_01006_Statistics	22.5267	WT	SYP2GFP	2740000	121633
0.103908	-0.215285	TZ	Herm	DLW118	2021_07_22_DLW118_20C_herm_01006_Statistics	15.6826	WT	SYP2GFP	1880000	119878
0.0774746	-0.251134	TZ	Herm	DLW118	2021_07_22_DLW118_20C_herm_01006_Statistics	19.4373	WT	SYP2GFP	2410000	123988
0.129409	-0.1807	TZ	Herm	DLW118	2021_07_22_DLW118_20C_herm_01006_Statistics	18.5618	WT	SYP2GFP	2280000	122833
0.144761	-0.15988	TZ	Herm	DLW118	2021_07_22_DLW118_20C_herm_01006_Statistics	14.6248	WT	SYP2GFP	1830000	125130
0.125244	-0.186349	TZ	Herm	DLW118	2021_07_22_DLW118_20C_herm_01006_Statistics	11.4903	WT	SYP2GFP	1380000	120101
0.143978	-0.160943	TZ	Herm	DLW118	2021_07_22_DLW118_20C_herm_01006_Statistics	16.523	WT	SYP2GFP	2110000	127701
0.120645	-0.192586	TZ	Herm	DLW118	2021_07_22_DLW118_20C_herm_01006_Statistics	18.5968	WT	SYP2GFP	2340000	125828
0.138521	-0.168343	TZ	Herm	DLW118	2021_07_22_DLW118_20C_herm_01006_Statistics	19.7531	WT	SYP2GFP	2800000	141750
0.185284	-0.104922	TZ	Herm	DLW118	2021_07_22_DLW118_20C_herm_01006_Statistics	18.8643	WT	SYP2GFP	2420000	128285
0.1673	-0.129313	TZ	Herm	DLW118	2021_07_22_DLW118_20C_herm_01006_Statistics	22.9627	WT	SYP2GFP	2840000	123679
0.150781	-0.151716	TZ	Herm	DLW118	2021_07_22_DLW118_20C_herm_01006_Statistics	20.3509	WT	SYP2GFP	2630000	129233
0.186221	-0.103652	TZ	Herm	DLW118	2021_07_22_DLW118_20C_herm_01006_Statistics	16.2767	WT	SYP2GFP	2050000	125947
0.156868	-0.143461	TZ	Herm	DLW118	2021_07_22_DLW118_20C_herm_01006_Statistics	23.1042	WT	SYP2GFP	2980000	128981
0.174963	-0.11892	TZ	Herm	DLW118	2021_07_22_DLW118_20C_herm_01006_Statistics	16.7318	WT	SYP2GFP	2170000	129693
0.167889	-0.128515	TZ	Herm	DLW118	2021_07_22_DLW118_20C_herm_01006_Statistics	18.9002	WT	SYP2GFP	2280000	120634
0.19776	-0.0880023	TZ	Herm	DLW118	2021_07_22_DLW118_20C_herm_01006_Statistics	15.9375	WT	SYP2GFP	2040000	128000
0.212536	-0.0679628	TZ	Herm	DLW118	2021_07_22_DLW118_20C_herm_01006_Statistics	13.1474	WT	SYP2GFP	1560000	118655
0.190497	-0.0978528	TZ	Herm	DLW118	2021_07_22_DLW118_20C_herm_01006_Statistics	18.1348	WT	SYP2GFP	2360000	130137
0.215954	-0.0633274	TZ	Herm	DLW118	2021_07_22_DLW118_20C_herm_01006_Statistics	25.6246	WT	SYP2GFP	3330000	129953
0.189555	-0.0991303	TZ	Herm	DLW118	2021_07_22_DLW118_20C_herm_01006_Statistics	21.3155	WT	SYP2GFP	2830000	132767
0.212319	-0.0682577	TZ	Herm	DLW118	2021_07_22_DLW118_20C_herm_01006_Statistics	26.5879	WT	SYP2GFP	3210000	120732
0.243095	-0.0265184	TZ	Herm	DLW118	2021_07_22_DLW118_20C_herm_01006_Statistics	23.2494	WT	SYP2GFP	3250000	139789
0.212272	-0.0683216	TZ	Herm	DLW118	2021_07_22_DLW118_20C_herm_01006_Statistics	23.8138	WT	SYP2GFP	2970000	124718
0.23504	-0.0374436	TZ	Herm	DLW118	2021_07_22_DLW118_20C_herm_01006_Statistics	18.8878	WT	SYP2GFP	2580000	136596
0.241568	-0.0285903	TZ	Herm	DLW118	2021_07_22_DLW118_20C_herm_01006_Statistics	25.8727	WT	SYP2GFP	3780000	146100
0.24524	-0.0236103	TZ	Herm	DLW118	2021_07_22_DLW118_20C_herm_01006_Statistics	22.4664	WT	SYP2GFP	2960000	131752
0.255483	-0.00971802	TZ	Herm	DLW118	2021_07_22_DLW118_20C_herm_01006_Statistics	21.1326	WT	SYP2GFP	3010000	142434
0.276072	0.0182049	EP	Herm	DLW118	2021_07_22_DLW118_20C_herm_01006_Statistics	30.7651	WT	SYP2GFP	4410000	143344
0.266059	0.00462484	EP	Herm	DLW118	2021_07_22_DLW118_20C_herm_01006_Statistics	32.9132	WT	SYP2GFP	4670000	141888
0.301651	0.0528951	EP	Herm	DLW118	2021_07_22_DLW118_20C_herm_01006_Statistics	32.2106	WT	SYP2GFP	4710000	146225
0.278079	0.0209259	EP	Herm	DLW118	2021_07_22_DLW118_20C_herm_01006_Statistics	31.1277	WT	SYP2GFP	4440000	142638
0.297577	0.0473697	EP	Herm	DLW118	2021_07_22_DLW118_20C_herm_01006_Statistics	33.3338	WT	SYP2GFP	4850000	145498
0.324018	0.0832287	EP	Herm	DLW118	2021_07_22_DLW118_20C_herm_01006_Statistics	30.8381	WT	SYP2GFP	4680000	151760
0.298042	0.048	EP	Herm	DLW118	2021_07_22_DLW118_20C_herm_01006_Statistics	30.777	WT	SYP2GFP	4300000	139715
0.273871	0.0152194	EP	Herm	DLW118	2021_07_22_DLW118_20C_herm_01006_Statistics	30.9682	WT	SYP2GFP	4140000	133686
0.306166	0.0590179	EP	Herm	DLW118	2021_07_22_DLW118_20C_herm_01006_Statistics	25.5305	WT	SYP2GFP	3350000	131216
0.325951	0.0858503	EP	Herm	DLW118	2021_07_22_DLW118_20C_herm_01006_Statistics	33.5126	WT	SYP2GFP	5170000	154270
0.32653	0.0866353	EP	Herm	DLW118	2021_07_22_DLW118_20C_herm_01006_Statistics	28.2288	WT	SYP2GFP	3810000	134969
0.323659	0.0827423	EP	Herm	DLW118	2021_07_22_DLW118_20C_herm_01006_Statistics	34.0154	WT	SYP2GFP	4990000	146698
0.339418	0.104115	EP	Herm	DLW118	2021_07_22_DLW118_20C_herm_01006_Statistics	30.2317	WT	SYP2GFP	4290000	141904
0.353531	0.123255	EP	Herm	DLW118	2021_07_22_DLW118_20C_herm_01006_Statistics	32.8581	WT	SYP2GFP	4890000	148822
0.430931	0.228225	EP	Herm	DLW118	2021_07_22_DLW118_20C_herm_01006_Statistics	35.5686	WT	SYP2GFP	5470000	153787
0.419858	0.213208	EP	Herm	DLW118	2021_07_22_DLW118_20C_herm_01006_Statistics	33.3353	WT	SYP2GFP	4780000	143392
0.359851	0.131826	EP	Herm	DLW118	2021_07_22_DLW118_20C_herm_01006_Statistics	32.1724	WT	SYP2GFP	4550000	141426
0.356866	0.127778	EP	Herm	DLW118	2021_07_22_DLW118_20C_herm_01006_Statistics	35.5283	WT	SYP2GFP	5280000	148614
0.404179	0.191944	EP	Herm	DLW118	2021_07_22_DLW118_20C_herm_01006_Statistics	39.6057	WT	SYP2GFP	6130000	154776
0.38297	0.16318	EP	Herm	DLW118	2021_07_22_DLW118_20C_herm_01006_Statistics	29.3412	WT	SYP2GFP	4170000	142121
0.378151	0.156644	EP	Herm	DLW118	2021_07_22_DLW118_20C_herm_01006_Statistics	34.0447	WT	SYP2GFP	5010000	147159
0.43831	0.238233	EP	Herm	DLW118	2021_07_22_DLW118_20C_herm_01006_Statistics	33.5334	WT	SYP2GFP	5450000	162525
0.423467	0.218103	EP	Herm	DLW118	2021_07_22_DLW118_20C_herm_01006_Statistics	31.7022	WT	SYP2GFP	4790000	151094
0.401017	0.187655	EP	Herm	DLW118	2021_07_22_DLW118_20C_herm_01006_Statistics	37.5506	WT	SYP2GFP	5690000	151529
0.448619	0.252214	EP	Herm	DLW118	2021_07_22_DLW118_20C_herm_01006_Statistics	37.698	WT	SYP2GFP	6210000	164730
0.428556	0.225005	EP	Herm	DLW118	2021_07_22_DLW118_20C_herm_01006_Statistics	28.7762	WT	SYP2GFP	4200000	145954
0.408006	0.197134	EP	Herm	DLW118	2021_07_22_DLW118_20C_herm_01006_Statistics	27.4537	WT	SYP2GFP	3960000	144243
0.492768	0.312088	EP	Herm	DLW118	2021_07_22_DLW118_20C_herm_01006_Statistics	33.8764	WT	SYP2GFP	4960000	146415
0.460041	0.267704	EP	Herm	DLW118	2021_07_22_DLW118_20C_herm_01006_Statistics	42.9726	WT	SYP2GFP	6810000	158473
0.454123	0.259678	EP	Herm	DLW118	2021_07_22_DLW118_20C_herm_01006_Statistics	37.5893	WT	SYP2GFP	5610000	149245
0.524827	0.355568	MP	Herm	DLW118	2021_07_22_DLW118_20C_herm_01006_Statistics	40.5261	WT	SYP2GFP	6050000	149287
0.516797	0.344677	MP	Herm	DLW118	2021_07_22_DLW118_20C_herm_01006_Statistics	33.7564	WT	SYP2GFP	4930000	146046
0.462103	0.2705	EP	Herm	DLW118	2021_07_22_DLW118_20C_herm_01006_Statistics	36.2225	WT	SYP2GFP	5530000	152668
0.510379	0.335974	MP	Herm	DLW118	2021_07_22_DLW118_20C_herm_01006_Statistics	33.8437	WT	SYP2GFP	4980000	147147
0.477372	0.291209	EP	Herm	DLW118	2021_07_22_DLW118_20C_herm_01006_Statistics	39.216	WT	SYP2GFP	6040000	154019
0.552058	0.392498	MP	Herm	DLW118	2021_07_22_DLW118_20C_herm_01006_Statistics	22.4361	WT	SYP2GFP	3030000	135050
0.545824	0.384044	MP	Herm	DLW118	2021_07_22_DLW118_20C_herm_01006_Statistics	24.5606	WT	SYP2GFP	3400000	138433
0.574342	0.42272	MP	Herm	DLW118	2021_07_22_DLW118_20C_herm_01006_Statistics	44.0345	WT	SYP2GFP	6500000	147612
0.59557	0.451509	MP	Herm	DLW118	2021_07_22_DLW118_20C_herm_01006_Statistics	22.2909	WT	SYP2GFP	2890000	129649
0.623208	0.488993	MP	Herm	DLW118	2021_07_22_DLW118_20C_herm_01006_Statistics	29.3969	WT	SYP2GFP	4120000	140151
0.603908	0.462818	MP	Herm	DLW118	2021_07_22_DLW118_20C_herm_01006_Statistics	51.7371	WT	SYP2GFP	7890000	152502
0.630295	0.498604	MP	Herm	DLW118	2021_07_22_DLW118_20C_herm_01006_Statistics	27.9652	WT	SYP2GFP	3640000	130162
0.631984	0.500894	MP	Herm	DLW118	2021_07_22_DLW118_20C_herm_01006_Statistics	34.5373	WT	SYP2GFP	5100000	147666
0.645557	0.519303	MP	Herm	DLW118	2021_07_22_DLW118_20C_herm_01006_Statistics	27.9727	WT	SYP2GFP	3820000	136562
0.658911	0.537412	MP	Herm	DLW118	2021_07_22_DLW118_20C_herm_01006_Statistics	36.1302	WT	SYP2GFP	5510000	152504
0.670883	0.553649	MP	Herm	DLW118	2021_07_22_DLW118_20C_herm_01006_Statistics	26.8401	WT	SYP2GFP	3640000	135618
0.669681	0.552019	MP	Herm	DLW118	2021_07_22_DLW118_20C_herm_01006_Statistics	35.9597	WT	SYP2GFP	5420000	150724
0.683313	0.570507	MP	Herm	DLW118	2021_07_22_DLW118_20C_herm_01006_Statistics	47.7779	WT	SYP2GFP	7890000	165139
0.679971	0.565975	MP	Herm	DLW118	2021_07_22_DLW118_20C_herm_01006_Statistics	25.6881	WT	SYP2GFP	3330000	129632
0.693873	0.584829	MP	Herm	DLW118	2021_07_22_DLW118_20C_herm_01006_Statistics	38.9914	WT	SYP2GFP	6040000	154906
0.698546	0.591167	MP	Herm	DLW118	2021_07_22_DLW118_20C_herm_01006_Statistics	35.2407	WT	SYP2GFP	4890000	138760
0.708125	0.604157	MP	Herm	DLW118	2021_07_22_DLW118_20C_herm_01006_Statistics	26.4171	WT	SYP2GFP	3750000	141954
0.719222	0.619207	MP	Herm	DLW118	2021_07_22_DLW118_20C_herm_01006_Statistics	33.3022	WT	SYP2GFP	4630000	139030
0.724931	0.62695	MP	Herm	DLW118	2021_07_22_DLW118_20C_herm_01006_Statistics	36.8032	WT	SYP2GFP	5100000	138575
0.732742	0.637543	MP	Herm	DLW118	2021_07_22_DLW118_20C_herm_01006_Statistics	28.4916	WT	SYP2GFP	3610000	126704
0.7344	0.639792	MP	Herm	DLW118	2021_07_22_DLW118_20C_herm_01006_Statistics	34.1594	WT	SYP2GFP	4790000	140225
0.752448	0.664268	MP	Herm	DLW118	2021_07_22_DLW118_20C_herm_01006_Statistics	36.6887	WT	SYP2GFP	5240000	142823
0.770215	0.688365	LP	Herm	DLW118	2021_07_22_DLW118_20C_herm_01006_Statistics	39.0156	WT	SYP2GFP	5480000	140457
0.748482	0.65889	MP	Herm	DLW118	2021_07_22_DLW118_20C_herm_01006_Statistics	33.9873	WT	SYP2GFP	4690000	137993
0.779974	0.7016	LP	Herm	DLW118	2021_07_22_DLW118_20C_herm_01006_Statistics	39.9217	WT	SYP2GFP	6060000	151797
0.76331	0.678999	LP	Herm	DLW118	2021_07_22_DLW118_20C_herm_01006_Statistics	40.8584	WT	SYP2GFP	5780000	141464
0.792065	0.717997	LP	Herm	DLW118	2021_07_22_DLW118_20C_herm_01006_Statistics	41.1402	WT	SYP2GFP	6170000	149975
0.800167	0.728986	LP	Herm	DLW118	2021_07_22_DLW118_20C_herm_01006_Statistics	16.5963	WT	SYP2GFP	2530000	152444
0.794636	0.721484	LP	Herm	DLW118	2021_07_22_DLW118_20C_herm_01006_Statistics	20.2107	WT	SYP2GFP	3040000	150415
0.801999	0.73147	LP	Herm	DLW118	2021_07_22_DLW118_20C_herm_01006_Statistics	38.6593	WT	SYP2GFP	5310000	137354
0.856642	0.805577	LP	Herm	DLW118	2021_07_22_DLW118_20C_herm_01006_Statistics	44.3805	WT	SYP2GFP	6630000	149390
0.835018	0.776251	LP	Herm	DLW118	2021_07_22_DLW118_20C_herm_01006_Statistics	42.903	WT	SYP2GFP	6280000	146377
0.812496	0.745706	LP	Herm	DLW118	2021_07_22_DLW118_20C_herm_01006_Statistics	36.2932	WT	SYP2GFP	5260000	144931
0.86412	0.815719	LP	Herm	DLW118	2021_07_22_DLW118_20C_herm_01006_Statistics	46.1854	WT	SYP2GFP	6740000	145934
0.842558	0.786476	LP	Herm	DLW118	2021_07_22_DLW118_20C_herm_01006_Statistics	40.2451	WT	SYP2GFP	6050000	150329
0.815123	0.749269	LP	Herm	DLW118	2021_07_22_DLW118_20C_herm_01006_Statistics	38.3117	WT	SYP2GFP	5530000	144342
0.895175	0.857836	LP	Herm	DLW118	2021_07_22_DLW118_20C_herm_01006_Statistics	49.2492	WT	SYP2GFP	6540000	132794
0.84841	0.794413	LP	Herm	DLW118	2021_07_22_DLW118_20C_herm_01006_Statistics	35.9759	WT	SYP2GFP	4960000	137870
0.869861	0.823505	LP	Herm	DLW118	2021_07_22_DLW118_20C_herm_01006_Statistics	49.6213	WT	SYP2GFP	7720000	155578
0.846336	0.7916	LP	Herm	DLW118	2021_07_22_DLW118_20C_herm_01006_Statistics	35.1471	WT	SYP2GFP	4750000	135146
0.833158	0.773728	LP	Herm	DLW118	2021_07_22_DLW118_20C_herm_01006_Statistics	34.8747	WT	SYP2GFP	4810000	137922
0.905431	0.871745	LP	Herm	DLW118	2021_07_22_DLW118_20C_herm_01006_Statistics	42.4755	WT	SYP2GFP	5550000	130664
0.883401	0.841867	LP	Herm	DLW118	2021_07_22_DLW118_20C_herm_01006_Statistics	37.1433	WT	SYP2GFP	5060000	136229
0.902974	0.868412	LP	Herm	DLW118	2021_07_22_DLW118_20C_herm_01006_Statistics	49.5454	WT	SYP2GFP	7180000	144918
0.972776	0.963078	LP	Herm	DLW118	2021_07_22_DLW118_20C_herm_01006_Statistics	39.3328	WT	SYP2GFP	5350000	136019
0.989011	0.985096	LP	Herm	DLW118	2021_07_22_DLW118_20C_herm_01006_Statistics	40.68	WT	SYP2GFP	5370000	132006
0.938948	0.917201	LP	Herm	DLW118	2021_07_22_DLW118_20C_herm_01006_Statistics	51.2481	WT	SYP2GFP	6960000	135810
0.974275	0.965112	LP	Herm	DLW118	2021_07_22_DLW118_20C_herm_01006_Statistics	28.7218	WT	SYP2GFP	4320000	150408
0.940616	0.919463	LP	Herm	DLW118	2021_07_22_DLW118_20C_herm_01006_Statistics	42.7182	WT	SYP2GFP	5460000	127814
0.984656	0.979191	LP	Herm	DLW118	2021_07_22_DLW118_20C_herm_01006_Statistics	18.1477	WT	SYP2GFP	2430000	133901
0.916144	0.886274	LP	Herm	DLW118	2021_07_22_DLW118_20C_herm_01006_Statistics	39.8291	WT	SYP2GFP	5100000	128047
0.94844	0.930074	LP	Herm	DLW118	2021_07_22_DLW118_20C_herm_01006_Statistics	36.7643	WT	SYP2GFP	4890000	133009
0.922595	0.895023	LP	Herm	DLW118	2021_07_22_DLW118_20C_herm_01006_Statistics	31.8417	WT	SYP2GFP	4050000	127192
0.972298	0.962431	LP	Herm	DLW118	2021_07_22_DLW118_20C_herm_01006_Statistics	39.9041	WT	SYP2GFP	5220000	130814
0.939404	0.917819	LP	Herm	DLW118	2021_07_22_DLW118_20C_herm_01006_Statistics	29.0795	WT	SYP2GFP	3800000	130676
0.976657	0.968342	LP	Herm	DLW118	2021_07_22_DLW118_20C_herm_01006_Statistics	32.1205	WT	SYP2GFP	4170000	129824
0.910355	0.878422	LP	Herm	DLW118	2021_07_22_DLW118_20C_herm_01006_Statistics	29.8566	WT	SYP2GFP	3930000	131629
0.0892464	-0.154492	TZ	Male	DLW118	2021_07_22_DLW118_20C_male_01_Statistics	6.76661	WT	SYP2GFP	783414	115776
0.0591	-0.192706	TZ	Male	DLW118	2021_07_22_DLW118_20C_male_01_Statistics	4.08846	WT	SYP2GFP	503221	123083
0.0397004	-0.217298	TZ	Male	DLW118	2021_07_22_DLW118_20C_male_01_Statistics	3.88548	WT	SYP2GFP	498898	128401
0.130194	-0.102585	TZ	Male	DLW118	2021_07_22_DLW118_20C_male_01_Statistics	3.92936	WT	SYP2GFP	502996	128010
0.106314	-0.132856	TZ	Male	DLW118	2021_07_22_DLW118_20C_male_01_Statistics	2.0533	WT	SYP2GFP	220206	107245
0.15102	-0.0761868	TZ	Male	DLW118	2021_07_22_DLW118_20C_male_01_Statistics	3.9279	WT	SYP2GFP	435172	110790
0.200417	-0.0135692	TZ	Male	DLW118	2021_07_22_DLW118_20C_male_01_Statistics	2.88247	WT	SYP2GFP	330199	114554
0.197542	-0.0172145	TZ	Male	DLW118	2021_07_22_DLW118_20C_male_01_Statistics	6.85745	WT	SYP2GFP	830119	121054
0.199774	-0.014385	TZ	Male	DLW118	2021_07_22_DLW118_20C_male_01_Statistics	7.36228	WT	SYP2GFP	868317	117941
0.212648	0.00193425	EP	Male	DLW118	2021_07_22_DLW118_20C_male_01_Statistics	7.3766	WT	SYP2GFP	892725	121021
0.252094	0.0519374	EP	Male	DLW118	2021_07_22_DLW118_20C_male_01_Statistics	11.7684	WT	SYP2GFP	1490000	126610
0.231476	0.0258015	EP	Male	DLW118	2021_07_22_DLW118_20C_male_01_Statistics	6.8183	WT	SYP2GFP	860870	126259
0.245564	0.0436596	EP	Male	DLW118	2021_07_22_DLW118_20C_male_01_Statistics	6.60716	WT	SYP2GFP	768308	116284
0.218254	0.00904086	EP	Male	DLW118	2021_07_22_DLW118_20C_male_01_Statistics	3.70347	WT	SYP2GFP	379689	102522
0.357179	0.185146	EP	Male	DLW118	2021_07_22_DLW118_20C_male_01_Statistics	15.2048	WT	SYP2GFP	2080000	136799
0.341472	0.165235	EP	Male	DLW118	2021_07_22_DLW118_20C_male_01_Statistics	13.5445	WT	SYP2GFP	1660000	122559
0.284279	0.0927362	EP	Male	DLW118	2021_07_22_DLW118_20C_male_01_Statistics	10.2685	WT	SYP2GFP	1360000	132444
0.269549	0.0740643	EP	Male	DLW118	2021_07_22_DLW118_20C_male_01_Statistics	9.87908	WT	SYP2GFP	1210000	122481
0.402477	0.242566	EP	Male	DLW118	2021_07_22_DLW118_20C_male_01_Statistics	18.6413	WT	SYP2GFP	2530000	135720
0.410401	0.252611	EP	Male	DLW118	2021_07_22_DLW118_20C_male_01_Statistics	14.4668	WT	SYP2GFP	1820000	125805
0.454422	0.308413	EP	Male	DLW118	2021_07_22_DLW118_20C_male_01_Statistics	15.171	WT	SYP2GFP	1880000	123921
0.374861	0.207559	EP	Male	DLW118	2021_07_22_DLW118_20C_male_01_Statistics	13.8103	WT	SYP2GFP	1730000	125269
0.474345	0.333668	MP	Male	DLW118	2021_07_22_DLW118_20C_male_01_Statistics	21.0514	WT	SYP2GFP	2860000	135858
0.435611	0.284568	EP	Male	DLW118	2021_07_22_DLW118_20C_male_01_Statistics	19.3218	WT	SYP2GFP	2600000	134563
0.589441	0.479566	MP	Male	DLW118	2021_07_22_DLW118_20C_male_01_Statistics	28.4311	WT	SYP2GFP	4340000	152650
0.553338	0.433801	MP	Male	DLW118	2021_07_22_DLW118_20C_male_01_Statistics	20.4367	WT	SYP2GFP	2830000	138476
0.515741	0.386142	MP	Male	DLW118	2021_07_22_DLW118_20C_male_01_Statistics	18.7835	WT	SYP2GFP	2520000	134160
0.57693	0.463707	MP	Male	DLW118	2021_07_22_DLW118_20C_male_01_Statistics	25.8622	WT	SYP2GFP	3500000	135333
0.495791	0.360854	MP	Male	DLW118	2021_07_22_DLW118_20C_male_01_Statistics	18.9497	WT	SYP2GFP	2360000	124540
0.533586	0.408763	MP	Male	DLW118	2021_07_22_DLW118_20C_male_01_Statistics	18.0654	WT	SYP2GFP	2160000	119566
0.733721	0.662459	MP	Male	DLW118	2021_07_22_DLW118_20C_male_01_Statistics	37.6598	WT	SYP2GFP	6720000	178440
0.699433	0.618995	MP	Male	DLW118	2021_07_22_DLW118_20C_male_01_Statistics	36.0295	WT	SYP2GFP	6430000	178465
0.719925	0.644971	MP	Male	DLW118	2021_07_22_DLW118_20C_male_01_Statistics	30.9737	WT	SYP2GFP	4710000	152064
0.665796	0.576356	MP	Male	DLW118	2021_07_22_DLW118_20C_male_01_Statistics	28.537	WT	SYP2GFP	4400000	154186
0.631649	0.53307	MP	Male	DLW118	2021_07_22_DLW118_20C_male_01_Statistics	29.004	WT	SYP2GFP	4290000	147911
0.678761	0.59279	MP	Male	DLW118	2021_07_22_DLW118_20C_male_01_Statistics	28.4955	WT	SYP2GFP	4130000	144935
0.645918	0.551158	MP	Male	DLW118	2021_07_22_DLW118_20C_male_01_Statistics	21.0087	WT	SYP2GFP	2700000	128518
0.61049	0.506248	MP	Male	DLW118	2021_07_22_DLW118_20C_male_01_Statistics	21.7245	WT	SYP2GFP	3010000	138553
0.814775	0.765204	LP	Male	DLW118	2021_07_22_DLW118_20C_male_01_Statistics	37.2735	WT	SYP2GFP	6640000	178143
0.771262	0.710047	LP	Male	DLW118	2021_07_22_DLW118_20C_male_01_Statistics	34.5366	WT	SYP2GFP	5830000	168806
0.82897	0.783198	LP	Male	DLW118	2021_07_22_DLW118_20C_male_01_Statistics	35.2884	WT	SYP2GFP	6280000	177962
0.785643	0.728277	LP	Male	DLW118	2021_07_22_DLW118_20C_male_01_Statistics	32.4589	WT	SYP2GFP	5320000	163900
0.763682	0.700437	LP	Male	DLW118	2021_07_22_DLW118_20C_male_01_Statistics	34.2337	WT	SYP2GFP	5720000	167087
0.981015	0.975934	LP	Male	DLW118	2021_07_22_DLW118_20C_male_01_Statistics	29.9825	WT	SYP2GFP	4830000	161094
0.974415	0.967568	LP	Male	DLW118	2021_07_22_DLW118_20C_male_01_Statistics	26.8843	WT	SYP2GFP	3970000	147670
0.886681	0.856354	LP	Male	DLW118	2021_07_22_DLW118_20C_male_01_Statistics	34.9708	WT	SYP2GFP	6170000	176433
0.876172	0.843033	LP	Male	DLW118	2021_07_22_DLW118_20C_male_01_Statistics	33.2891	WT	SYP2GFP	5510000	165520
0.877387	0.844573	LP	Male	DLW118	2021_07_22_DLW118_20C_male_01_Statistics	29.1537	WT	SYP2GFP	5010000	171848
0.908886	0.884502	LP	Male	DLW118	2021_07_22_DLW118_20C_male_01_Statistics	33.0811	WT	SYP2GFP	5380000	162631
0.916726	0.89444	LP	Male	DLW118	2021_07_22_DLW118_20C_male_01_Statistics	33.2572	WT	SYP2GFP	5690000	171091
0.904272	0.878653	LP	Male	DLW118	2021_07_22_DLW118_20C_male_01_Statistics	29.2794	WT	SYP2GFP	4480000	153009
0.940072	0.924034	LP	Male	DLW118	2021_07_22_DLW118_20C_male_01_Statistics	34.0322	WT	SYP2GFP	5380000	158086
0.943247	0.928058	LP	Male	DLW118	2021_07_22_DLW118_20C_male_01_Statistics	24.6287	WT	SYP2GFP	3510000	142517
0.84709	0.806167	LP	Male	DLW118	2021_07_22_DLW118_20C_male_01_Statistics	35.5067	WT	SYP2GFP	6250000	176023
0.866316	0.830539	LP	Male	DLW118	2021_07_22_DLW118_20C_male_01_Statistics	31.3071	WT	SYP2GFP	5920000	189094
1	1	LP	Male	DLW118	2021_07_22_DLW118_20C_male_01_Statistics	25.355	WT	SYP2GFP	4060000	160126
0.858123	0.820154	LP	Male	DLW118	2021_07_22_DLW118_20C_male_01_Statistics	31.5671	WT	SYP2GFP	5280000	167263
0.861181	0.82403	LP	Male	DLW118	2021_07_22_DLW118_20C_male_01_Statistics	34.1457	WT	SYP2GFP	5570000	163124
0.052269	-0.442432	TZ	Male	DLW118	2021_07_22_DLW118_20C_male_01001_Statistics	10.1893	WT	SYP2GFP	1440000	141325
0.0475799	-0.449568	TZ	Male	DLW118	2021_07_22_DLW118_20C_male_01001_Statistics	17.3608	WT	SYP2GFP	2700000	155523
0.0936825	-0.379401	TZ	Male	DLW118	2021_07_22_DLW118_20C_male_01001_Statistics	15.7508	WT	SYP2GFP	2390000	151738
0.117894	-0.342551	TZ	Male	DLW118	2021_07_22_DLW118_20C_male_01001_Statistics	13.0878	WT	SYP2GFP	1840000	140589
0.162715	-0.274335	TZ	Male	DLW118	2021_07_22_DLW118_20C_male_01001_Statistics	14.6721	WT	SYP2GFP	2390000	162894
0.139798	-0.309214	TZ	Male	DLW118	2021_07_22_DLW118_20C_male_01001_Statistics	14.1659	WT	SYP2GFP	2060000	145420
0.104247	-0.363322	TZ	Male	DLW118	2021_07_22_DLW118_20C_male_01001_Statistics	16.5194	WT	SYP2GFP	2600000	157391
0.16749	-0.267068	TZ	Male	DLW118	2021_07_22_DLW118_20C_male_01001_Statistics	17.5457	WT	SYP2GFP	2810000	160153
0.199777	-0.217927	TZ	Male	DLW118	2021_07_22_DLW118_20C_male_01001_Statistics	35.3799	WT	SYP2GFP	6030000	170436
0.226548	-0.177182	TZ	Male	DLW118	2021_07_22_DLW118_20C_male_01001_Statistics	15.058	WT	SYP2GFP	2050000	136140
0.195512	-0.224419	TZ	Male	DLW118	2021_07_22_DLW118_20C_male_01001_Statistics	20.1121	WT	SYP2GFP	2970000	147672
0.279419	-0.0967133	TZ	Male	DLW118	2021_07_22_DLW118_20C_male_01001_Statistics	15.7612	WT	SYP2GFP	2290000	145294
0.310208	-0.0498532	TZ	Male	DLW118	2021_07_22_DLW118_20C_male_01001_Statistics	12.5906	WT	SYP2GFP	1890000	150112
0.319577	-0.0355938	TZ	Male	DLW118	2021_07_22_DLW118_20C_male_01001_Statistics	19.8888	WT	SYP2GFP	2980000	149833
0.301911	-0.0624798	TZ	Male	DLW118	2021_07_22_DLW118_20C_male_01001_Statistics	12.9705	WT	SYP2GFP	1790000	138005
0.342963	0	EP	Male	DLW118	2021_07_22_DLW118_20C_male_01001_Statistics	15.7284	WT	SYP2GFP	2600000	165306
0.374326	0.0477339	EP	Male	DLW118	2021_07_22_DLW118_20C_male_01001_Statistics	16.2204	WT	SYP2GFP	2610000	160908
0.409087	0.100639	EP	Male	DLW118	2021_07_22_DLW118_20C_male_01001_Statistics	22.3393	WT	SYP2GFP	3740000	167418
0.405249	0.0947977	EP	Male	DLW118	2021_07_22_DLW118_20C_male_01001_Statistics	13.9805	WT	SYP2GFP	2110000	150925
0.357616	0.022301	EP	Male	DLW118	2021_07_22_DLW118_20C_male_01001_Statistics	18.0279	WT	SYP2GFP	2670000	148104
0.378944	0.0547619	EP	Male	DLW118	2021_07_22_DLW118_20C_male_01001_Statistics	19.664	WT	SYP2GFP	2910000	147986
0.463903	0.184069	EP	Male	DLW118	2021_07_22_DLW118_20C_male_01001_Statistics	22.684	WT	SYP2GFP	3820000	168401
0.501727	0.241637	EP	Male	DLW118	2021_07_22_DLW118_20C_male_01001_Statistics	25.1987	WT	SYP2GFP	4190000	166278
0.444862	0.155089	EP	Male	DLW118	2021_07_22_DLW118_20C_male_01001_Statistics	21.8865	WT	SYP2GFP	3720000	169968
0.477822	0.205253	EP	Male	DLW118	2021_07_22_DLW118_20C_male_01001_Statistics	16.8287	WT	SYP2GFP	2680000	159252
0.439858	0.147473	EP	Male	DLW118	2021_07_22_DLW118_20C_male_01001_Statistics	19.4595	WT	SYP2GFP	2890000	148514
0.55877	0.328456	EP	Male	DLW118	2021_07_22_DLW118_20C_male_01001_Statistics	29.0142	WT	SYP2GFP	5220000	179912
0.546331	0.309523	EP	Male	DLW118	2021_07_22_DLW118_20C_male_01001_Statistics	28.6864	WT	SYP2GFP	5190000	180922
0.513973	0.260275	EP	Male	DLW118	2021_07_22_DLW118_20C_male_01001_Statistics	26.4384	WT	SYP2GFP	4520000	170963
0.517025	0.264919	EP	Male	DLW118	2021_07_22_DLW118_20C_male_01001_Statistics	24.9196	WT	SYP2GFP	3960000	158911
0.663319	0.487577	MP	Male	DLW118	2021_07_22_DLW118_20C_male_01001_Statistics	34.578	WT	SYP2GFP	6430000	185956
0.626284	0.431211	MP	Male	DLW118	2021_07_22_DLW118_20C_male_01001_Statistics	32.8945	WT	SYP2GFP	5880000	178753
0.608163	0.403629	MP	Male	DLW118	2021_07_22_DLW118_20C_male_01001_Statistics	31.3669	WT	SYP2GFP	5230000	166736
0.79453	0.687278	LP	Male	DLW118	2021_07_22_DLW118_20C_male_01001_Statistics	38.2896	WT	SYP2GFP	6580000	171848
0.764739	0.641936	MP	Male	DLW118	2021_07_22_DLW118_20C_male_01001_Statistics	39.4397	WT	SYP2GFP	7010000	177740
0.733992	0.595139	MP	Male	DLW118	2021_07_22_DLW118_20C_male_01001_Statistics	34.3629	WT	SYP2GFP	5320000	154818
0.724166	0.580184	MP	Male	DLW118	2021_07_22_DLW118_20C_male_01001_Statistics	36.3798	WT	SYP2GFP	6870000	188841
0.813592	0.71629	LP	Male	DLW118	2021_07_22_DLW118_20C_male_01001_Statistics	40.9616	WT	SYP2GFP	7250000	176995
0.966295	0.948702	LP	Male	DLW118	2021_07_22_DLW118_20C_male_01001_Statistics	27.5748	WT	SYP2GFP	4130000	149774
0.920602	0.879157	LP	Male	DLW118	2021_07_22_DLW118_20C_male_01001_Statistics	32.7955	WT	SYP2GFP	5100000	155509
0.968434	0.951957	LP	Male	DLW118	2021_07_22_DLW118_20C_male_01001_Statistics	31.0694	WT	SYP2GFP	4740000	152562
0.930358	0.894006	LP	Male	DLW118	2021_07_22_DLW118_20C_male_01001_Statistics	30.6917	WT	SYP2GFP	5100000	166169
0.875137	0.809961	LP	Male	DLW118	2021_07_22_DLW118_20C_male_01001_Statistics	32.401	WT	SYP2GFP	5200000	160489
0.840544	0.75731	LP	Male	DLW118	2021_07_22_DLW118_20C_male_01001_Statistics	30.7318	WT	SYP2GFP	5000000	162698
1	1	LP	Male	DLW118	2021_07_22_DLW118_20C_male_01001_Statistics	24.857	WT	SYP2GFP	3360000	135173
0.0664783	-0.24449	TZ	Male	DLW118	2021_07_22_DLW118_20C_male_01004_Statistics	41.9498	WT	SYP2GFP	4870000	116091
0.076066	-0.231709	TZ	Male	DLW118	2021_07_22_DLW118_20C_male_01004_Statistics	13.3196	WT	SYP2GFP	1240000	93095.9
0.0156843	-0.312204	TZ	Male	DLW118	2021_07_22_DLW118_20C_male_01004_Statistics	9.77137	WT	SYP2GFP	832911	85239.9
0.0916595	-0.210921	TZ	Male	DLW118	2021_07_22_DLW118_20C_male_01004_Statistics	7.11117	WT	SYP2GFP	596606	83897
0.0638463	-0.247999	TZ	Male	DLW118	2021_07_22_DLW118_20C_male_01004_Statistics	4.47398	WT	SYP2GFP	382681	85534.8
0.0400716	-0.279693	TZ	Male	DLW118	2021_07_22_DLW118_20C_male_01004_Statistics	6.5297	WT	SYP2GFP	583624	89379.9
0.00550186	-0.325779	TZ	Male	DLW118	2021_07_22_DLW118_20C_male_01004_Statistics	15.0518	WT	SYP2GFP	1610000	106964
0.132127	-0.156973	TZ	Male	DLW118	2021_07_22_DLW118_20C_male_01004_Statistics	10.9978	WT	SYP2GFP	946091	86025.5
0.104205	-0.194196	TZ	Male	DLW118	2021_07_22_DLW118_20C_male_01004_Statistics	10.4303	WT	SYP2GFP	987661	94691.5
0.167	-0.110483	TZ	Male	DLW118	2021_07_22_DLW118_20C_male_01004_Statistics	10.824	WT	SYP2GFP	1030000	95158.9
0.179887	-0.0933032	TZ	Male	DLW118	2021_07_22_DLW118_20C_male_01004_Statistics	10.2874	WT	SYP2GFP	945236	91882.9
0.196716	-0.0708687	TZ	Male	DLW118	2021_07_22_DLW118_20C_male_01004_Statistics	10.9092	WT	SYP2GFP	1120000	102666
0.21837	-0.0420011	TZ	Male	DLW118	2021_07_22_DLW118_20C_male_01004_Statistics	11.3584	WT	SYP2GFP	1070000	94203.4
0.290831	0.0545974	EP	Male	DLW118	2021_07_22_DLW118_20C_male_01004_Statistics	7.77044	WT	SYP2GFP	643243	82780.8
0.27773	0.0371321	EP	Male	DLW118	2021_07_22_DLW118_20C_male_01004_Statistics	14.8055	WT	SYP2GFP	1370000	92533.2
0.252689	0.00375013	EP	Male	DLW118	2021_07_22_DLW118_20C_male_01004_Statistics	17.4174	WT	SYP2GFP	1840000	105641
0.273555	0.031567	EP	Male	DLW118	2021_07_22_DLW118_20C_male_01004_Statistics	15.5047	WT	SYP2GFP	1800000	116094
0.293256	0.0578307	EP	Male	DLW118	2021_07_22_DLW118_20C_male_01004_Statistics	14.4751	WT	SYP2GFP	1580000	109153
0.359068	0.145565	EP	Male	DLW118	2021_07_22_DLW118_20C_male_01004_Statistics	18.569	WT	SYP2GFP	1730000	93166
0.333647	0.111676	EP	Male	DLW118	2021_07_22_DLW118_20C_male_01004_Statistics	16.6794	WT	SYP2GFP	1850000	110915
0.337943	0.117403	EP	Male	DLW118	2021_07_22_DLW118_20C_male_01004_Statistics	17.9186	WT	SYP2GFP	1820000	101570
0.377325	0.169903	EP	Male	DLW118	2021_07_22_DLW118_20C_male_01004_Statistics	19.1437	WT	SYP2GFP	2130000	111264
0.366329	0.155245	EP	Male	DLW118	2021_07_22_DLW118_20C_male_01004_Statistics	17.7733	WT	SYP2GFP	2000000	112528
0.425246	0.233787	EP	Male	DLW118	2021_07_22_DLW118_20C_male_01004_Statistics	18.8078	WT	SYP2GFP	1970000	104744
0.405712	0.207747	EP	Male	DLW118	2021_07_22_DLW118_20C_male_01004_Statistics	22.6974	WT	SYP2GFP	2580000	113669
0.40802	0.210824	EP	Male	DLW118	2021_07_22_DLW118_20C_male_01004_Statistics	18.5363	WT	SYP2GFP	1880000	101423
0.456904	0.275991	EP	Male	DLW118	2021_07_22_DLW118_20C_male_01004_Statistics	23.3714	WT	SYP2GFP	2440000	104401
0.44197	0.256083	EP	Male	DLW118	2021_07_22_DLW118_20C_male_01004_Statistics	19.904	WT	SYP2GFP	2420000	121584
0.471897	0.295979	EP	Male	DLW118	2021_07_22_DLW118_20C_male_01004_Statistics	29.5352	WT	SYP2GFP	3530000	119518
0.472727	0.297086	EP	Male	DLW118	2021_07_22_DLW118_20C_male_01004_Statistics	18.2292	WT	SYP2GFP	2090000	114651
0.512548	0.350172	MP	Male	DLW118	2021_07_22_DLW118_20C_male_01004_Statistics	35.8639	WT	SYP2GFP	4160000	115994
0.497643	0.330301	EP	Male	DLW118	2021_07_22_DLW118_20C_male_01004_Statistics	28.7864	WT	SYP2GFP	3140000	109079
0.559202	0.412367	MP	Male	DLW118	2021_07_22_DLW118_20C_male_01004_Statistics	31.6496	WT	SYP2GFP	3700000	116905
0.539923	0.386665	MP	Male	DLW118	2021_07_22_DLW118_20C_male_01004_Statistics	28.7448	WT	SYP2GFP	2880000	100192
0.588812	0.451839	MP	Male	DLW118	2021_07_22_DLW118_20C_male_01004_Statistics	30.4436	WT	SYP2GFP	3300000	108397
0.583258	0.444435	MP	Male	DLW118	2021_07_22_DLW118_20C_male_01004_Statistics	36.8639	WT	SYP2GFP	4850000	131565
0.631961	0.509363	MP	Male	DLW118	2021_07_22_DLW118_20C_male_01004_Statistics	24.2691	WT	SYP2GFP	2540000	104660
0.632471	0.510042	MP	Male	DLW118	2021_07_22_DLW118_20C_male_01004_Statistics	38.7784	WT	SYP2GFP	5260000	135643
0.612419	0.483311	MP	Male	DLW118	2021_07_22_DLW118_20C_male_01004_Statistics	33.3807	WT	SYP2GFP	4220000	126420
0.663468	0.551364	MP	Male	DLW118	2021_07_22_DLW118_20C_male_01004_Statistics	40.4743	WT	SYP2GFP	5320000	131441
0.754491	0.672709	LP	Male	DLW118	2021_07_22_DLW118_20C_male_01004_Statistics	42.4362	WT	SYP2GFP	6220000	146573
0.728988	0.63871	MP	Male	DLW118	2021_07_22_DLW118_20C_male_01004_Statistics	41.3673	WT	SYP2GFP	5740000	138757
0.68131	0.57515	MP	Male	DLW118	2021_07_22_DLW118_20C_male_01004_Statistics	33.5857	WT	SYP2GFP	3850000	114632
0.711391	0.615251	MP	Male	DLW118	2021_07_22_DLW118_20C_male_01004_Statistics	43.9977	WT	SYP2GFP	6080000	138189
0.71835	0.624529	MP	Male	DLW118	2021_07_22_DLW118_20C_male_01004_Statistics	32.8474	WT	SYP2GFP	3790000	115382
0.748962	0.665338	MP	Male	DLW118	2021_07_22_DLW118_20C_male_01004_Statistics	40.6668	WT	SYP2GFP	6010000	147786
0.683812	0.578485	MP	Male	DLW118	2021_07_22_DLW118_20C_male_01004_Statistics	41.0163	WT	SYP2GFP	5620000	137019
0.844485	0.792681	LP	Male	DLW118	2021_07_22_DLW118_20C_male_01004_Statistics	44.0688	WT	SYP2GFP	6660000	151127
0.824516	0.76606	LP	Male	DLW118	2021_07_22_DLW118_20C_male_01004_Statistics	48.2631	WT	SYP2GFP	7390000	153119
0.808138	0.744226	LP	Male	DLW118	2021_07_22_DLW118_20C_male_01004_Statistics	46.5044	WT	SYP2GFP	7500000	161275
0.778524	0.704747	LP	Male	DLW118	2021_07_22_DLW118_20C_male_01004_Statistics	45.3939	WT	SYP2GFP	6940000	152884
0.857902	0.810567	LP	Male	DLW118	2021_07_22_DLW118_20C_male_01004_Statistics	43.8179	WT	SYP2GFP	6280000	143320
0.785249	0.713713	LP	Male	DLW118	2021_07_22_DLW118_20C_male_01004_Statistics	40.2309	WT	SYP2GFP	5770000	143422
0.859681	0.812939	LP	Male	DLW118	2021_07_22_DLW118_20C_male_01004_Statistics	46.1353	WT	SYP2GFP	6730000	145875
0.930183	0.906926	LP	Male	DLW118	2021_07_22_DLW118_20C_male_01004_Statistics	42.7629	WT	SYP2GFP	5900000	137970
0.975628	0.967509	LP	Male	DLW118	2021_07_22_DLW118_20C_male_01004_Statistics	35.5368	WT	SYP2GFP	3870000	108901
0.929114	0.905501	LP	Male	DLW118	2021_07_22_DLW118_20C_male_01004_Statistics	43.7598	WT	SYP2GFP	5950000	135970
0.910948	0.881283	LP	Male	DLW118	2021_07_22_DLW118_20C_male_01004_Statistics	46.1497	WT	SYP2GFP	6130000	132829
0.955488	0.940661	LP	Male	DLW118	2021_07_22_DLW118_20C_male_01004_Statistics	43.1636	WT	SYP2GFP	5300000	122789
0.990129	0.98684	LP	Male	DLW118	2021_07_22_DLW118_20C_male_01004_Statistics	40.9718	WT	SYP2GFP	5490000	133995
0.0862102	-0.0906001	TZ	Male	DLW118	2021_07_22_DLW118_20C_male_01005_Statistics	11.26	WT	SYP2GFP	911117	80916.3
0.032761	-0.154391	TZ	Male	DLW118	2021_07_22_DLW118_20C_male_01005_Statistics	9.53	WT	SYP2GFP	606580	63649.5
0.103759	-0.0696558	TZ	Male	DLW118	2021_07_22_DLW118_20C_male_01005_Statistics	21.95	WT	SYP2GFP	2162820	98533.9
0.147284	-0.0177096	TZ	Male	DLW118	2021_07_22_DLW118_20C_male_01005_Statistics	36.16	WT	SYP2GFP	3880380	107311
0.0530005	-0.130236	TZ	Male	DLW118	2021_07_22_DLW118_20C_male_01005_Statistics	23.18	WT	SYP2GFP	2102680	90711
0.0882243	-0.0881963	TZ	Male	DLW118	2021_07_22_DLW118_20C_male_01005_Statistics	18.77	WT	SYP2GFP	1543110	82211.5
0.0106518	-0.180778	TZ	Male	DLW118	2021_07_22_DLW118_20C_male_01005_Statistics	17.29	WT	SYP2GFP	1255080	72589.9
0.290018	0.152643	EP	Male	DLW118	2021_07_22_DLW118_20C_male_01005_Statistics	33.1	WT	SYP2GFP	3031730	91593.1
0.270184	0.128971	EP	Male	DLW118	2021_07_22_DLW118_20C_male_01005_Statistics	40.52	WT	SYP2GFP	4641530	114549
0.310774	0.177415	EP	Male	DLW118	2021_07_22_DLW118_20C_male_01005_Statistics	39.05	WT	SYP2GFP	4597330	117729
0.177115	0.0178939	EP	Male	DLW118	2021_07_22_DLW118_20C_male_01005_Statistics	29.28	WT	SYP2GFP	3105520	106063
0.244206	0.0979667	EP	Male	DLW118	2021_07_22_DLW118_20C_male_01005_Statistics	45.91	WT	SYP2GFP	5051960	110041
0.287085	0.149142	EP	Male	DLW118	2021_07_22_DLW118_20C_male_01005_Statistics	45.01	WT	SYP2GFP	5090850	113105
0.216886	0.0653608	EP	Male	DLW118	2021_07_22_DLW118_20C_male_01005_Statistics	38.97	WT	SYP2GFP	4309460	110584
0.182613	0.024456	EP	Male	DLW118	2021_07_22_DLW118_20C_male_01005_Statistics	23.41	WT	SYP2GFP	2349890	100380
0.511948	0.417514	MP	Male	DLW118	2021_07_22_DLW118_20C_male_01005_Statistics	47.62	WT	SYP2GFP	5958550	125127
0.56718	0.483433	MP	Male	DLW118	2021_07_22_DLW118_20C_male_01005_Statistics	52.28	WT	SYP2GFP	6974370	133404
0.401502	0.285697	EP	Male	DLW118	2021_07_22_DLW118_20C_male_01005_Statistics	38.04	WT	SYP2GFP	3801120	99924.3
0.505818	0.410198	MP	Male	DLW118	2021_07_22_DLW118_20C_male_01005_Statistics	50.49	WT	SYP2GFP	6678530	132274
0.458591	0.353833	MP	Male	DLW118	2021_07_22_DLW118_20C_male_01005_Statistics	50.86	WT	SYP2GFP	6369560	125237
0.446294	0.339157	MP	Male	DLW118	2021_07_22_DLW118_20C_male_01005_Statistics	49.7	WT	SYP2GFP	6047950	121689
0.347466	0.221207	EP	Male	DLW118	2021_07_22_DLW118_20C_male_01005_Statistics	37.21	WT	SYP2GFP	3436570	92356.1
0.387012	0.268404	EP	Male	DLW118	2021_07_22_DLW118_20C_male_01005_Statistics	45.68	WT	SYP2GFP	4906180	107403
0.364165	0.241137	EP	Male	DLW118	2021_07_22_DLW118_20C_male_01005_Statistics	44.1	WT	SYP2GFP	4970200	112703
0.410417	0.296338	EP	Male	DLW118	2021_07_22_DLW118_20C_male_01005_Statistics	42.63	WT	SYP2GFP	5667570	132948
0.335993	0.207514	EP	Male	DLW118	2021_07_22_DLW118_20C_male_01005_Statistics	41.76	WT	SYP2GFP	4789050	114680
0.72728	0.674511	LP	Male	DLW118	2021_07_22_DLW118_20C_male_01005_Statistics	66.24	WT	SYP2GFP	10749800	162286
0.744942	0.69559	LP	Male	DLW118	2021_07_22_DLW118_20C_male_01005_Statistics	72.84	WT	SYP2GFP	10073600	138298
0.668979	0.604929	MP	Male	DLW118	2021_07_22_DLW118_20C_male_01005_Statistics	61.22	WT	SYP2GFP	9072270	148191
0.606141	0.529933	MP	Male	DLW118	2021_07_22_DLW118_20C_male_01005_Statistics	57.32	WT	SYP2GFP	7822350	136468
0.677423	0.615008	MP	Male	DLW118	2021_07_22_DLW118_20C_male_01005_Statistics	63.93	WT	SYP2GFP	9383020	146770
0.613472	0.538682	MP	Male	DLW118	2021_07_22_DLW118_20C_male_01005_Statistics	60.37	WT	SYP2GFP	8357060	138431
0.97783	0.97354	LP	Male	DLW118	2021_07_22_DLW118_20C_male_01005_Statistics	74.59	WT	SYP2GFP	9005530	120734
0.886215	0.864199	LP	Male	DLW118	2021_07_22_DLW118_20C_male_01005_Statistics	62.69	WT	SYP2GFP	9944870	158636
0.924231	0.909571	LP	Male	DLW118	2021_07_22_DLW118_20C_male_01005_Statistics	65.14	WT	SYP2GFP	8825080	135479
0.835242	0.803363	LP	Male	DLW118	2021_07_22_DLW118_20C_male_01005_Statistics	60.44	WT	SYP2GFP	8952270	148118
0.79098	0.750537	LP	Male	DLW118	2021_07_22_DLW118_20C_male_01005_Statistics	50.97	WT	SYP2GFP	7304990	143319
0.783783	0.741947	LP	Male	DLW118	2021_07_22_DLW118_20C_male_01005_Statistics	59.08	WT	SYP2GFP	8675400	146842
0.868066	0.842538	LP	Male	DLW118	2021_07_22_DLW118_20C_male_01005_Statistics	69.8	WT	SYP2GFP	11150700	159752
0.808899	0.771923	LP	Male	DLW118	2021_07_22_DLW118_20C_male_01005_Statistics	64.53	WT	SYP2GFP	8999700	139465
0.0816636	-0.0395236	TZ	Herm	DLW163	2021_09_07_DLW163_20C_herm_1_Statistics	17.73	spo-11	SYP2GFP	3880660	218875
0.117437	0.000970228	EP	Herm	DLW163	2021_09_07_DLW163_20C_herm_1_Statistics	15.74	spo-11	SYP2GFP	3204680	203601
0.174285	0.0653201	EP	Herm	DLW163	2021_09_07_DLW163_20C_herm_1_Statistics	15.68	spo-11	SYP2GFP	3105330	198044
0.227534	0.125597	EP	Herm	DLW163	2021_09_07_DLW163_20C_herm_1_Statistics	16.2	spo-11	SYP2GFP	3496000	215802
0.12678	0.0115466	EP	Herm	DLW163	2021_09_07_DLW163_20C_herm_1_Statistics	15.71	spo-11	SYP2GFP	3112810	198142
0.131982	0.0174353	EP	Herm	DLW163	2021_09_07_DLW163_20C_herm_1_Statistics	16.9	spo-11	SYP2GFP	3474410	205586
0.21031	0.106099	EP	Herm	DLW163	2021_09_07_DLW163_20C_herm_1_Statistics	22.77	spo-11	SYP2GFP	4981900	218792
0.24873	0.14959	EP	Herm	DLW163	2021_09_07_DLW163_20C_herm_1_Statistics	23.11	spo-11	SYP2GFP	5278070	228389
0.263679	0.166511	EP	Herm	DLW163	2021_09_07_DLW163_20C_herm_1_Statistics	23.99	spo-11	SYP2GFP	5695900	237428
0.173061	0.0639352	EP	Herm	DLW163	2021_09_07_DLW163_20C_herm_1_Statistics	16.58	spo-11	SYP2GFP	3395740	204809
0.187044	0.0797631	EP	Herm	DLW163	2021_09_07_DLW163_20C_herm_1_Statistics	38.33	spo-11	SYP2GFP	8077060	210724
0.303854	0.211987	EP	Herm	DLW163	2021_09_07_DLW163_20C_herm_1_Statistics	25.42	spo-11	SYP2GFP	6025280	237029
0.439575	0.36562	MP	Herm	DLW163	2021_09_07_DLW163_20C_herm_1_Statistics	30.11	spo-11	SYP2GFP	8081440	268397
0.39346	0.313419	EP	Herm	DLW163	2021_09_07_DLW163_20C_herm_1_Statistics	20.93	spo-11	SYP2GFP	5100820	243709
0.484783	0.416793	MP	Herm	DLW163	2021_09_07_DLW163_20C_herm_1_Statistics	36.81	spo-11	SYP2GFP	10051900	273075
0.519165	0.455712	MP	Herm	DLW163	2021_09_07_DLW163_20C_herm_1_Statistics	20.97	spo-11	SYP2GFP	5066610	241612
0.392362	0.312175	EP	Herm	DLW163	2021_09_07_DLW163_20C_herm_1_Statistics	22.93	spo-11	SYP2GFP	5848170	255044
0.36971	0.286534	EP	Herm	DLW163	2021_09_07_DLW163_20C_herm_1_Statistics	26.86	spo-11	SYP2GFP	6830330	254294
0.438814	0.364758	MP	Herm	DLW163	2021_09_07_DLW163_20C_herm_1_Statistics	33.34	spo-11	SYP2GFP	8784940	263496
0.461252	0.390156	MP	Herm	DLW163	2021_09_07_DLW163_20C_herm_1_Statistics	35.34	spo-11	SYP2GFP	9595130	271509
0.352766	0.267355	EP	Herm	DLW163	2021_09_07_DLW163_20C_herm_1_Statistics	27.3	spo-11	SYP2GFP	6507800	238381
0.376911	0.294686	EP	Herm	DLW163	2021_09_07_DLW163_20C_herm_1_Statistics	30.23	spo-11	SYP2GFP	7805100	258191
0.483156	0.414952	MP	Herm	DLW163	2021_09_07_DLW163_20C_herm_1_Statistics	33.38	spo-11	SYP2GFP	9074010	271840
0.349074	0.263175	EP	Herm	DLW163	2021_09_07_DLW163_20C_herm_1_Statistics	26.12	spo-11	SYP2GFP	6504070	249007
0.440662	0.36685	MP	Herm	DLW163	2021_09_07_DLW163_20C_herm_1_Statistics	35.29	spo-11	SYP2GFP	9567440	271109
0.490808	0.423613	MP	Herm	DLW163	2021_09_07_DLW163_20C_herm_1_Statistics	33.51	spo-11	SYP2GFP	8947750	267017
0.463654	0.392876	MP	Herm	DLW163	2021_09_07_DLW163_20C_herm_1_Statistics	33.89	spo-11	SYP2GFP	8970350	264690
0.483095	0.414882	MP	Herm	DLW163	2021_09_07_DLW163_20C_herm_1_Statistics	38.79	spo-11	SYP2GFP	10910500	281271
0.55841	0.500136	MP	Herm	DLW163	2021_09_07_DLW163_20C_herm_1_Statistics	41.83	spo-11	SYP2GFP	12397500	296378
0.712917	0.675032	LP	Herm	DLW163	2021_09_07_DLW163_20C_herm_1_Statistics	37.82	spo-11	SYP2GFP	10591200	280042
0.577288	0.521505	MP	Herm	DLW163	2021_09_07_DLW163_20C_herm_1_Statistics	39.52	spo-11	SYP2GFP	12128900	306905
0.552064	0.492953	MP	Herm	DLW163	2021_09_07_DLW163_20C_herm_1_Statistics	34.14	spo-11	SYP2GFP	9431250	276252
0.52766	0.465328	MP	Herm	DLW163	2021_09_07_DLW163_20C_herm_1_Statistics	27.11	spo-11	SYP2GFP	7220160	266328
0.671105	0.627702	MP	Herm	DLW163	2021_09_07_DLW163_20C_herm_1_Statistics	34.48	spo-11	SYP2GFP	9349070	271145
0.571195	0.514608	MP	Herm	DLW163	2021_09_07_DLW163_20C_herm_1_Statistics	43.75	spo-11	SYP2GFP	13203400	301792
0.644449	0.597529	MP	Herm	DLW163	2021_09_07_DLW163_20C_herm_1_Statistics	43.73	spo-11	SYP2GFP	13014000	297599
0.546101	0.486203	MP	Herm	DLW163	2021_09_07_DLW163_20C_herm_1_Statistics	36.08	spo-11	SYP2GFP	10227500	283467
0.595491	0.54211	MP	Herm	DLW163	2021_09_07_DLW163_20C_herm_1_Statistics	37.46	spo-11	SYP2GFP	10877500	290376
0.536335	0.475148	MP	Herm	DLW163	2021_09_07_DLW163_20C_herm_1_Statistics	38.96	spo-11	SYP2GFP	10255200	263224
0.619175	0.56892	MP	Herm	DLW163	2021_09_07_DLW163_20C_herm_1_Statistics	41.58	spo-11	SYP2GFP	12570900	302330
0.77078	0.740531	LP	Herm	DLW163	2021_09_07_DLW163_20C_herm_1_Statistics	35.24	spo-11	SYP2GFP	8392200	238144
0.748238	0.715014	LP	Herm	DLW163	2021_09_07_DLW163_20C_herm_1_Statistics	33.85	spo-11	SYP2GFP	8061150	238143
0.766908	0.736148	LP	Herm	DLW163	2021_09_07_DLW163_20C_herm_1_Statistics	32.77	spo-11	SYP2GFP	7975060	243365
0.744819	0.711144	LP	Herm	DLW163	2021_09_07_DLW163_20C_herm_1_Statistics	39.94	spo-11	SYP2GFP	10684800	267521
0.81606	0.791787	LP	Herm	DLW163	2021_09_07_DLW163_20C_herm_1_Statistics	22.57	spo-11	SYP2GFP	4700390	208258
0.993629	0.992788	LP	Herm	DLW163	2021_09_07_DLW163_20C_herm_1_Statistics	23.35	spo-11	SYP2GFP	5701550	244178
0.948668	0.941895	LP	Herm	DLW163	2021_09_07_DLW163_20C_herm_1_Statistics	28.8	spo-11	SYP2GFP	7238140	251324
0.933266	0.92446	LP	Herm	DLW163	2021_09_07_DLW163_20C_herm_1_Statistics	29.09	spo-11	SYP2GFP	6536200	224689
0.918796	0.90808	LP	Herm	DLW163	2021_09_07_DLW163_20C_herm_1_Statistics	25.76	spo-11	SYP2GFP	5885490	228474
0.877959	0.861854	LP	Herm	DLW163	2021_09_07_DLW163_20C_herm_1_Statistics	24.26	spo-11	SYP2GFP	5559080	229146
0.0324898	-0.0832633	TZ	Herm	DLW163	2021_09_07_DLW163_20C_herm_1001_Statistics	13.81	spo-11	SYP2GFP	2233720	161747
0.0542953	-0.058849	TZ	Herm	DLW163	2021_09_07_DLW163_20C_herm_1001_Statistics	17.37	spo-11	SYP2GFP	2956270	170194
0.0108696	-0.10747	TZ	Herm	DLW163	2021_09_07_DLW163_20C_herm_1001_Statistics	16.38	spo-11	SYP2GFP	2853050	174179
0.0373124	-0.0778637	TZ	Herm	DLW163	2021_09_07_DLW163_20C_herm_1001_Statistics	17.17	spo-11	SYP2GFP	2939940	171225
0.0784794	-0.0317715	TZ	Herm	DLW163	2021_09_07_DLW163_20C_herm_1001_Statistics	21.97	spo-11	SYP2GFP	4370110	198913
0.087133	-0.0220826	TZ	Herm	DLW163	2021_09_07_DLW163_20C_herm_1001_Statistics	14.65	spo-11	SYP2GFP	2718810	185584
0.0338454	-0.0817455	TZ	Herm	DLW163	2021_09_07_DLW163_20C_herm_1001_Statistics	13.66	spo-11	SYP2GFP	2426650	177646
0.0668309	-0.0448136	TZ	Herm	DLW163	2021_09_07_DLW163_20C_herm_1001_Statistics	14.31	spo-11	SYP2GFP	2569240	179542
0.06085	-0.0515101	TZ	Herm	DLW163	2021_09_07_DLW163_20C_herm_1001_Statistics	14.65	spo-11	SYP2GFP	2606000	177884
0.080713	-0.0292706	TZ	Herm	DLW163	2021_09_07_DLW163_20C_herm_1001_Statistics	15.89	spo-11	SYP2GFP	2706950	170356
0.100441	-0.00718231	TZ	Herm	DLW163	2021_09_07_DLW163_20C_herm_1001_Statistics	13.39	spo-11	SYP2GFP	2446940	182744
0.111445	0.00513766	EP	Herm	DLW163	2021_09_07_DLW163_20C_herm_1001_Statistics	25.59	spo-11	SYP2GFP	4365470	170593
0.111881	0.00562605	EP	Herm	DLW163	2021_09_07_DLW163_20C_herm_1001_Statistics	20.21	spo-11	SYP2GFP	3643130	180264
0.172001	0.0729394	EP	Herm	DLW163	2021_09_07_DLW163_20C_herm_1001_Statistics	16.69	spo-11	SYP2GFP	2936950	175971
0.123033	0.0181124	EP	Herm	DLW163	2021_09_07_DLW163_20C_herm_1001_Statistics	18.28	spo-11	SYP2GFP	3154930	172589
0.194875	0.0985494	EP	Herm	DLW163	2021_09_07_DLW163_20C_herm_1001_Statistics	19.97	spo-11	SYP2GFP	3747580	187660
0.164265	0.0642774	EP	Herm	DLW163	2021_09_07_DLW163_20C_herm_1001_Statistics	25.11	spo-11	SYP2GFP	4316980	171923
0.152735	0.0513678	EP	Herm	DLW163	2021_09_07_DLW163_20C_herm_1001_Statistics	20.08	spo-11	SYP2GFP	3399690	169307
0.193871	0.0974261	EP	Herm	DLW163	2021_09_07_DLW163_20C_herm_1001_Statistics	38.1	spo-11	SYP2GFP	7236670	189939
0.222714	0.129719	EP	Herm	DLW163	2021_09_07_DLW163_20C_herm_1001_Statistics	28.4	spo-11	SYP2GFP	5232380	184239
0.28351	0.197789	EP	Herm	DLW163	2021_09_07_DLW163_20C_herm_1001_Statistics	20.19	spo-11	SYP2GFP	3598860	178250
0.272078	0.18499	EP	Herm	DLW163	2021_09_07_DLW163_20C_herm_1001_Statistics	22.49	spo-11	SYP2GFP	4424010	196710
0.249108	0.159271	EP	Herm	DLW163	2021_09_07_DLW163_20C_herm_1001_Statistics	33.08	spo-11	SYP2GFP	6190290	187131
0.218262	0.124735	EP	Herm	DLW163	2021_09_07_DLW163_20C_herm_1001_Statistics	16.97	spo-11	SYP2GFP	3018200	177855
0.27009	0.182763	EP	Herm	DLW163	2021_09_07_DLW163_20C_herm_1001_Statistics	27.25	spo-11	SYP2GFP	5221370	191610
0.231365	0.139405	EP	Herm	DLW163	2021_09_07_DLW163_20C_herm_1001_Statistics	20.47	spo-11	SYP2GFP	3785900	184949
0.246288	0.156114	EP	Herm	DLW163	2021_09_07_DLW163_20C_herm_1001_Statistics	13.03	spo-11	SYP2GFP	2396790	183944
0.294574	0.210177	EP	Herm	DLW163	2021_09_07_DLW163_20C_herm_1001_Statistics	20.78	spo-11	SYP2GFP	4078080	196250
0.245006	0.154678	EP	Herm	DLW163	2021_09_07_DLW163_20C_herm_1001_Statistics	24.08	spo-11	SYP2GFP	4400700	182753
0.264335	0.17632	EP	Herm	DLW163	2021_09_07_DLW163_20C_herm_1001_Statistics	26.66	spo-11	SYP2GFP	5281990	198124
0.338076	0.258883	EP	Herm	DLW163	2021_09_07_DLW163_20C_herm_1001_Statistics	16.44	spo-11	SYP2GFP	3285190	199829
0.37522	0.300471	EP	Herm	DLW163	2021_09_07_DLW163_20C_herm_1001_Statistics	29.94	spo-11	SYP2GFP	5606860	187270
0.327534	0.24708	EP	Herm	DLW163	2021_09_07_DLW163_20C_herm_1001_Statistics	17.15	spo-11	SYP2GFP	3095150	180475
0.35207	0.274552	EP	Herm	DLW163	2021_09_07_DLW163_20C_herm_1001_Statistics	13.97	spo-11	SYP2GFP	2672580	191309
0.306906	0.223984	EP	Herm	DLW163	2021_09_07_DLW163_20C_herm_1001_Statistics	22.82	spo-11	SYP2GFP	4372390	191603
0.351053	0.273413	EP	Herm	DLW163	2021_09_07_DLW163_20C_herm_1001_Statistics	17.64	spo-11	SYP2GFP	3292600	186655
0.36689	0.291144	EP	Herm	DLW163	2021_09_07_DLW163_20C_herm_1001_Statistics	38.71	spo-11	SYP2GFP	7715900	199326
0.375097	0.300334	EP	Herm	DLW163	2021_09_07_DLW163_20C_herm_1001_Statistics	35.73	spo-11	SYP2GFP	7232360	202417
0.421929	0.352769	MP	Herm	DLW163	2021_09_07_DLW163_20C_herm_1001_Statistics	35.81	spo-11	SYP2GFP	7008180	195705
0.434586	0.36694	MP	Herm	DLW163	2021_09_07_DLW163_20C_herm_1001_Statistics	39.74	spo-11	SYP2GFP	8114350	204186
0.424478	0.355623	MP	Herm	DLW163	2021_09_07_DLW163_20C_herm_1001_Statistics	42.51	spo-11	SYP2GFP	8911140	209625
0.399093	0.3272	EP	Herm	DLW163	2021_09_07_DLW163_20C_herm_1001_Statistics	41.54	spo-11	SYP2GFP	8360000	201252
0.440573	0.373643	MP	Herm	DLW163	2021_09_07_DLW163_20C_herm_1001_Statistics	41.88	spo-11	SYP2GFP	8994160	214760
0.479331	0.417038	MP	Herm	DLW163	2021_09_07_DLW163_20C_herm_1001_Statistics	44.96	spo-11	SYP2GFP	9875150	219643
0.521411	0.464153	MP	Herm	DLW163	2021_09_07_DLW163_20C_herm_1001_Statistics	23.4	spo-11	SYP2GFP	4493140	192015
0.461493	0.397066	MP	Herm	DLW163	2021_09_07_DLW163_20C_herm_1001_Statistics	46.76	spo-11	SYP2GFP	10170000	217494
0.452469	0.386962	MP	Herm	DLW163	2021_09_07_DLW163_20C_herm_1001_Statistics	20.56	spo-11	SYP2GFP	4509810	219349
0.534407	0.478704	MP	Herm	DLW163	2021_09_07_DLW163_20C_herm_1001_Statistics	47.53	spo-11	SYP2GFP	11177400	235165
0.573519	0.522494	MP	Herm	DLW163	2021_09_07_DLW163_20C_herm_1001_Statistics	48.55	spo-11	SYP2GFP	11980100	246758
0.454008	0.388686	MP	Herm	DLW163	2021_09_07_DLW163_20C_herm_1001_Statistics	39.62	spo-11	SYP2GFP	7959700	200901
0.467088	0.403331	MP	Herm	DLW163	2021_09_07_DLW163_20C_herm_1001_Statistics	41.04	spo-11	SYP2GFP	8681880	211547
0.507756	0.448863	MP	Herm	DLW163	2021_09_07_DLW163_20C_herm_1001_Statistics	43.87	spo-11	SYP2GFP	10064400	229414
0.547186	0.493011	MP	Herm	DLW163	2021_09_07_DLW163_20C_herm_1001_Statistics	44.82	spo-11	SYP2GFP	10315400	230152
0.522687	0.465581	MP	Herm	DLW163	2021_09_07_DLW163_20C_herm_1001_Statistics	43.05	spo-11	SYP2GFP	10128100	235264
0.563838	0.511656	MP	Herm	DLW163	2021_09_07_DLW163_20C_herm_1001_Statistics	44.78	spo-11	SYP2GFP	10800700	241195
0.484724	0.423077	MP	Herm	DLW163	2021_09_07_DLW163_20C_herm_1001_Statistics	48.8	spo-11	SYP2GFP	10056000	206066
0.495347	0.43497	MP	Herm	DLW163	2021_09_07_DLW163_20C_herm_1001_Statistics	44.74	spo-11	SYP2GFP	9682280	216412
0.624024	0.579042	MP	Herm	DLW163	2021_09_07_DLW163_20C_herm_1001_Statistics	55.99	spo-11	SYP2GFP	13000100	232186
0.554322	0.501001	MP	Herm	DLW163	2021_09_07_DLW163_20C_herm_1001_Statistics	41.64	spo-11	SYP2GFP	9917440	238171
0.513345	0.455121	MP	Herm	DLW163	2021_09_07_DLW163_20C_herm_1001_Statistics	46.77	spo-11	SYP2GFP	10142300	216855
0.657398	0.616409	MP	Herm	DLW163	2021_09_07_DLW163_20C_herm_1001_Statistics	51.32	spo-11	SYP2GFP	11623600	226493
0.587424	0.538063	MP	Herm	DLW163	2021_09_07_DLW163_20C_herm_1001_Statistics	53.21	spo-11	SYP2GFP	12642000	237587
0.547487	0.493348	MP	Herm	DLW163	2021_09_07_DLW163_20C_herm_1001_Statistics	54.5	spo-11	SYP2GFP	12612400	231420
0.691064	0.654103	MP	Herm	DLW163	2021_09_07_DLW163_20C_herm_1001_Statistics	22.17	spo-11	SYP2GFP	4153650	187355
0.581529	0.531463	MP	Herm	DLW163	2021_09_07_DLW163_20C_herm_1001_Statistics	56.05	spo-11	SYP2GFP	13094000	233613
0.674786	0.635877	MP	Herm	DLW163	2021_09_07_DLW163_20C_herm_1001_Statistics	55.41	spo-11	SYP2GFP	12691900	229054
0.650998	0.609243	MP	Herm	DLW163	2021_09_07_DLW163_20C_herm_1001_Statistics	54.37	spo-11	SYP2GFP	13022600	239518
0.688687	0.651441	MP	Herm	DLW163	2021_09_07_DLW163_20C_herm_1001_Statistics	44.69	spo-11	SYP2GFP	9722930	217564
0.687685	0.65032	MP	Herm	DLW163	2021_09_07_DLW163_20C_herm_1001_Statistics	53.24	spo-11	SYP2GFP	12238000	229865
0.680919	0.642744	MP	Herm	DLW163	2021_09_07_DLW163_20C_herm_1001_Statistics	56.46	spo-11	SYP2GFP	13385300	237076
0.751095	0.721316	LP	Herm	DLW163	2021_09_07_DLW163_20C_herm_1001_Statistics	32.13	spo-11	SYP2GFP	5899780	183622
0.716817	0.682937	LP	Herm	DLW163	2021_09_07_DLW163_20C_herm_1001_Statistics	54.62	spo-11	SYP2GFP	12305000	225284
0.775896	0.749084	LP	Herm	DLW163	2021_09_07_DLW163_20C_herm_1001_Statistics	50.01	spo-11	SYP2GFP	10538900	210736
0.719932	0.686425	LP	Herm	DLW163	2021_09_07_DLW163_20C_herm_1001_Statistics	41.87	spo-11	SYP2GFP	8128870	194145
0.707948	0.673007	LP	Herm	DLW163	2021_09_07_DLW163_20C_herm_1001_Statistics	56.91	spo-11	SYP2GFP	12577100	221000
0.788629	0.763341	LP	Herm	DLW163	2021_09_07_DLW163_20C_herm_1001_Statistics	38.97	spo-11	SYP2GFP	6900860	177081
0.722518	0.68932	LP	Herm	DLW163	2021_09_07_DLW163_20C_herm_1001_Statistics	49.84	spo-11	SYP2GFP	11058300	221876
0.74562	0.715186	LP	Herm	DLW163	2021_09_07_DLW163_20C_herm_1001_Statistics	47.69	spo-11	SYP2GFP	10699200	224349
0.788282	0.762952	LP	Herm	DLW163	2021_09_07_DLW163_20C_herm_1001_Statistics	25.6	spo-11	SYP2GFP	4602300	179777
0.797804	0.773613	LP	Herm	DLW163	2021_09_07_DLW163_20C_herm_1001_Statistics	56.09	spo-11	SYP2GFP	11230400	200221
0.755342	0.726071	LP	Herm	DLW163	2021_09_07_DLW163_20C_herm_1001_Statistics	59.4	spo-11	SYP2GFP	13946500	234790
0.812709	0.790301	LP	Herm	DLW163	2021_09_07_DLW163_20C_herm_1001_Statistics	24.59	spo-11	SYP2GFP	4340740	176525
0.834026	0.814169	LP	Herm	DLW163	2021_09_07_DLW163_20C_herm_1001_Statistics	46.79	spo-11	SYP2GFP	8427900	180122
0.762397	0.73397	LP	Herm	DLW163	2021_09_07_DLW163_20C_herm_1001_Statistics	28.38	spo-11	SYP2GFP	5395260	190108
0.835548	0.815873	LP	Herm	DLW163	2021_09_07_DLW163_20C_herm_1001_Statistics	47.54	spo-11	SYP2GFP	9530550	200474
0.817294	0.795435	LP	Herm	DLW163	2021_09_07_DLW163_20C_herm_1001_Statistics	34.52	spo-11	SYP2GFP	7385090	213937
0.855068	0.837728	LP	Herm	DLW163	2021_09_07_DLW163_20C_herm_1001_Statistics	52.07	spo-11	SYP2GFP	10179900	195504
0.862892	0.846488	LP	Herm	DLW163	2021_09_07_DLW163_20C_herm_1001_Statistics	57.02	spo-11	SYP2GFP	11836800	207590
0.883329	0.86937	LP	Herm	DLW163	2021_09_07_DLW163_20C_herm_1001_Statistics	36.79	spo-11	SYP2GFP	6568460	178539
0.909784	0.898991	LP	Herm	DLW163	2021_09_07_DLW163_20C_herm_1001_Statistics	29.74	spo-11	SYP2GFP	5119080	172128
0.95226	0.946548	LP	Herm	DLW163	2021_09_07_DLW163_20C_herm_1001_Statistics	25.36	spo-11	SYP2GFP	4282840	168882
0.948854	0.942734	LP	Herm	DLW163	2021_09_07_DLW163_20C_herm_1001_Statistics	30.95	spo-11	SYP2GFP	5515120	178195
0.0665872	-0.0544137	TZ	Herm	DLW163	2021_09_07_DLW163_20C_herm_1002_Statistics	14.74	spo-11	SYP2GFP	2393690	162394
0.0893504	-0.0286995	TZ	Herm	DLW163	2021_09_07_DLW163_20C_herm_1002_Statistics	12.98	spo-11	SYP2GFP	2297870	177032
0.0771298	-0.0425044	TZ	Herm	DLW163	2021_09_07_DLW163_20C_herm_1002_Statistics	20.15	spo-11	SYP2GFP	3542390	175801
0.0592726	-0.0626765	TZ	Herm	DLW163	2021_09_07_DLW163_20C_herm_1002_Statistics	10.41	spo-11	SYP2GFP	1716490	164889
0.00235872	-0.126968	TZ	Herm	DLW163	2021_09_07_DLW163_20C_herm_1002_Statistics	7.66	spo-11	SYP2GFP	1193560	155817
0.0203156	-0.106684	TZ	Herm	DLW163	2021_09_07_DLW163_20C_herm_1002_Statistics	10.54	spo-11	SYP2GFP	1796560	170452
0.0859996	-0.0324847	TZ	Herm	DLW163	2021_09_07_DLW163_20C_herm_1002_Statistics	13.84	spo-11	SYP2GFP	2446830	176794
0.0152311	-0.112427	TZ	Herm	DLW163	2021_09_07_DLW163_20C_herm_1002_Statistics	9.23	spo-11	SYP2GFP	1422850	154155
0.0910884	-0.0267363	TZ	Herm	DLW163	2021_09_07_DLW163_20C_herm_1002_Statistics	12.91	spo-11	SYP2GFP	2191850	169779
0.110961	-0.0042873	TZ	Herm	DLW163	2021_09_07_DLW163_20C_herm_1002_Statistics	12.13	spo-11	SYP2GFP	2156760	177804
0.0641698	-0.0571444	TZ	Herm	DLW163	2021_09_07_DLW163_20C_herm_1002_Statistics	9.1	spo-11	SYP2GFP	1546200	169912
0.0484183	-0.0749378	TZ	Herm	DLW163	2021_09_07_DLW163_20C_herm_1002_Statistics	9.65	spo-11	SYP2GFP	1517620	157266
0.0336223	-0.0916519	TZ	Herm	DLW163	2021_09_07_DLW163_20C_herm_1002_Statistics	11.91	spo-11	SYP2GFP	1992440	167291
0.186585	0.0811396	EP	Herm	DLW163	2021_09_07_DLW163_20C_herm_1002_Statistics	21.22	spo-11	SYP2GFP	3971680	187167
0.161544	0.0528531	EP	Herm	DLW163	2021_09_07_DLW163_20C_herm_1002_Statistics	27.47	spo-11	SYP2GFP	5541490	201729
0.230938	0.131243	EP	Herm	DLW163	2021_09_07_DLW163_20C_herm_1002_Statistics	17.32	spo-11	SYP2GFP	3117740	180008
0.141782	0.030529	EP	Herm	DLW163	2021_09_07_DLW163_20C_herm_1002_Statistics	26.68	spo-11	SYP2GFP	5083580	190539
0.238063	0.139291	EP	Herm	DLW163	2021_09_07_DLW163_20C_herm_1002_Statistics	18.73	spo-11	SYP2GFP	3403080	181691
0.172871	0.0656479	EP	Herm	DLW163	2021_09_07_DLW163_20C_herm_1002_Statistics	26.51	spo-11	SYP2GFP	5150510	194286
0.221149	0.120185	EP	Herm	DLW163	2021_09_07_DLW163_20C_herm_1002_Statistics	22.47	spo-11	SYP2GFP	4296140	191194
0.199664	0.0959138	EP	Herm	DLW163	2021_09_07_DLW163_20C_herm_1002_Statistics	29.11	spo-11	SYP2GFP	5401080	185540
0.248487	0.151067	EP	Herm	DLW163	2021_09_07_DLW163_20C_herm_1002_Statistics	20.1	spo-11	SYP2GFP	3953320	196683
0.26933	0.174611	EP	Herm	DLW163	2021_09_07_DLW163_20C_herm_1002_Statistics	22.54	spo-11	SYP2GFP	4467660	198210
0.154391	0.0447724	EP	Herm	DLW163	2021_09_07_DLW163_20C_herm_1002_Statistics	9.86	spo-11	SYP2GFP	1844730	187092
0.128389	0.0154002	EP	Herm	DLW163	2021_09_07_DLW163_20C_herm_1002_Statistics	20.27	spo-11	SYP2GFP	4053750	199988
0.180402	0.0741558	EP	Herm	DLW163	2021_09_07_DLW163_20C_herm_1002_Statistics	18.73	spo-11	SYP2GFP	3417210	182446
0.291577	0.199743	EP	Herm	DLW163	2021_09_07_DLW163_20C_herm_1002_Statistics	27.41	spo-11	SYP2GFP	5273330	192387
0.322529	0.234707	EP	Herm	DLW163	2021_09_07_DLW163_20C_herm_1002_Statistics	33.11	spo-11	SYP2GFP	6668150	201394
0.350395	0.266185	EP	Herm	DLW163	2021_09_07_DLW163_20C_herm_1002_Statistics	33.89	spo-11	SYP2GFP	7563650	223182
0.286931	0.194494	EP	Herm	DLW163	2021_09_07_DLW163_20C_herm_1002_Statistics	29.48	spo-11	SYP2GFP	6028820	204505
0.31117	0.221875	EP	Herm	DLW163	2021_09_07_DLW163_20C_herm_1002_Statistics	32.64	spo-11	SYP2GFP	6700230	205277
0.339276	0.253625	EP	Herm	DLW163	2021_09_07_DLW163_20C_herm_1002_Statistics	33.2	spo-11	SYP2GFP	6739340	202992
0.364207	0.281788	EP	Herm	DLW163	2021_09_07_DLW163_20C_herm_1002_Statistics	27.69	spo-11	SYP2GFP	5563680	200927
0.39261	0.313872	EP	Herm	DLW163	2021_09_07_DLW163_20C_herm_1002_Statistics	29.85	spo-11	SYP2GFP	6230860	208739
0.292182	0.200426	EP	Herm	DLW163	2021_09_07_DLW163_20C_herm_1002_Statistics	28.54	spo-11	SYP2GFP	5896670	206611
0.372664	0.29134	EP	Herm	DLW163	2021_09_07_DLW163_20C_herm_1002_Statistics	27.07	spo-11	SYP2GFP	5644340	208509
0.310056	0.220617	EP	Herm	DLW163	2021_09_07_DLW163_20C_herm_1002_Statistics	27.83	spo-11	SYP2GFP	5357620	192512
0.287779	0.195452	EP	Herm	DLW163	2021_09_07_DLW163_20C_herm_1002_Statistics	29.26	spo-11	SYP2GFP	5263340	179882
0.324247	0.236648	EP	Herm	DLW163	2021_09_07_DLW163_20C_herm_1002_Statistics	30.74	spo-11	SYP2GFP	6048790	196773
0.405626	0.328576	EP	Herm	DLW163	2021_09_07_DLW163_20C_herm_1002_Statistics	33.04	spo-11	SYP2GFP	6617920	200300
0.371305	0.289805	EP	Herm	DLW163	2021_09_07_DLW163_20C_herm_1002_Statistics	31.92	spo-11	SYP2GFP	6250450	195816
0.385407	0.305735	EP	Herm	DLW163	2021_09_07_DLW163_20C_herm_1002_Statistics	27.85	spo-11	SYP2GFP	5701880	204735
0.444608	0.372611	MP	Herm	DLW163	2021_09_07_DLW163_20C_herm_1002_Statistics	33.83	spo-11	SYP2GFP	7459180	220490
0.380716	0.300437	EP	Herm	DLW163	2021_09_07_DLW163_20C_herm_1002_Statistics	28.51	spo-11	SYP2GFP	6008100	210737
0.42235	0.347467	MP	Herm	DLW163	2021_09_07_DLW163_20C_herm_1002_Statistics	33.52	spo-11	SYP2GFP	7325170	218531
0.478919	0.41137	MP	Herm	DLW163	2021_09_07_DLW163_20C_herm_1002_Statistics	35.99	spo-11	SYP2GFP	8002910	222365
0.519005	0.456653	MP	Herm	DLW163	2021_09_07_DLW163_20C_herm_1002_Statistics	35.04	spo-11	SYP2GFP	7171680	204671
0.490351	0.424284	MP	Herm	DLW163	2021_09_07_DLW163_20C_herm_1002_Statistics	35.36	spo-11	SYP2GFP	7476240	211432
0.619133	0.56976	MP	Herm	DLW163	2021_09_07_DLW163_20C_herm_1002_Statistics	45.6	spo-11	SYP2GFP	10281900	225480
0.542361	0.483036	MP	Herm	DLW163	2021_09_07_DLW163_20C_herm_1002_Statistics	34.88	spo-11	SYP2GFP	7506940	215222
0.497394	0.43224	MP	Herm	DLW163	2021_09_07_DLW163_20C_herm_1002_Statistics	37.88	spo-11	SYP2GFP	7876080	207922
0.584839	0.531021	MP	Herm	DLW163	2021_09_07_DLW163_20C_herm_1002_Statistics	44.44	spo-11	SYP2GFP	10439100	234903
0.51511	0.452252	MP	Herm	DLW163	2021_09_07_DLW163_20C_herm_1002_Statistics	37.94	spo-11	SYP2GFP	8543180	225176
0.5505	0.49223	MP	Herm	DLW163	2021_09_07_DLW163_20C_herm_1002_Statistics	43.59	spo-11	SYP2GFP	9505450	218065
0.555931	0.498365	MP	Herm	DLW163	2021_09_07_DLW163_20C_herm_1002_Statistics	38.47	spo-11	SYP2GFP	8292940	215569
0.638898	0.592088	MP	Herm	DLW163	2021_09_07_DLW163_20C_herm_1002_Statistics	41.96	spo-11	SYP2GFP	9424560	224608
0.60553	0.554393	MP	Herm	DLW163	2021_09_07_DLW163_20C_herm_1002_Statistics	41.4	spo-11	SYP2GFP	9490220	229232
0.524378	0.462721	MP	Herm	DLW163	2021_09_07_DLW163_20C_herm_1002_Statistics	33.39	spo-11	SYP2GFP	6956630	208345
0.571526	0.515981	MP	Herm	DLW163	2021_09_07_DLW163_20C_herm_1002_Statistics	24.72	spo-11	SYP2GFP	4852040	196280
0.644181	0.598056	MP	Herm	DLW163	2021_09_07_DLW163_20C_herm_1002_Statistics	46.09	spo-11	SYP2GFP	10677800	231673
0.601554	0.549902	MP	Herm	DLW163	2021_09_07_DLW163_20C_herm_1002_Statistics	39.34	spo-11	SYP2GFP	8326360	211651
0.645718	0.599792	MP	Herm	DLW163	2021_09_07_DLW163_20C_herm_1002_Statistics	28.06	spo-11	SYP2GFP	5872640	209289
0.57379	0.518539	MP	Herm	DLW163	2021_09_07_DLW163_20C_herm_1002_Statistics	34.14	spo-11	SYP2GFP	7650860	224103
0.617162	0.567534	MP	Herm	DLW163	2021_09_07_DLW163_20C_herm_1002_Statistics	36.3	spo-11	SYP2GFP	7822670	215501
0.58638	0.532761	MP	Herm	DLW163	2021_09_07_DLW163_20C_herm_1002_Statistics	33.66	spo-11	SYP2GFP	7587390	225413
0.629796	0.581805	MP	Herm	DLW163	2021_09_07_DLW163_20C_herm_1002_Statistics	36.92	spo-11	SYP2GFP	7926220	214686
0.52712	0.465819	MP	Herm	DLW163	2021_09_07_DLW163_20C_herm_1002_Statistics	32.03	spo-11	SYP2GFP	6492430	202698
0.50208	0.437533	MP	Herm	DLW163	2021_09_07_DLW163_20C_herm_1002_Statistics	36.87	spo-11	SYP2GFP	7641580	207257
0.747459	0.714721	LP	Herm	DLW163	2021_09_07_DLW163_20C_herm_1002_Statistics	45.7	spo-11	SYP2GFP	10736300	234930
0.687412	0.646891	MP	Herm	DLW163	2021_09_07_DLW163_20C_herm_1002_Statistics	49.14	spo-11	SYP2GFP	10333500	210287
0.66212	0.61832	MP	Herm	DLW163	2021_09_07_DLW163_20C_herm_1002_Statistics	43.88	spo-11	SYP2GFP	10622400	242078
0.707213	0.669258	LP	Herm	DLW163	2021_09_07_DLW163_20C_herm_1002_Statistics	43.56	spo-11	SYP2GFP	10049700	230709
0.778529	0.74982	LP	Herm	DLW163	2021_09_07_DLW163_20C_herm_1002_Statistics	53.37	spo-11	SYP2GFP	13207200	247465
0.749812	0.717379	LP	Herm	DLW163	2021_09_07_DLW163_20C_herm_1002_Statistics	55.58	spo-11	SYP2GFP	14628900	263204
0.665368	0.621989	MP	Herm	DLW163	2021_09_07_DLW163_20C_herm_1002_Statistics	41	spo-11	SYP2GFP	8847820	215800
0.676657	0.634741	MP	Herm	DLW163	2021_09_07_DLW163_20C_herm_1002_Statistics	40.78	spo-11	SYP2GFP	9466920	232146
0.718715	0.682252	LP	Herm	DLW163	2021_09_07_DLW163_20C_herm_1002_Statistics	46.13	spo-11	SYP2GFP	11399900	247126
0.725643	0.690078	LP	Herm	DLW163	2021_09_07_DLW163_20C_herm_1002_Statistics	47.6	spo-11	SYP2GFP	11224000	235798
0.801617	0.7759	LP	Herm	DLW163	2021_09_07_DLW163_20C_herm_1002_Statistics	43.3	spo-11	SYP2GFP	9718720	224451
0.769828	0.73999	LP	Herm	DLW163	2021_09_07_DLW163_20C_herm_1002_Statistics	35.43	spo-11	SYP2GFP	7910120	223261
0.736267	0.702079	LP	Herm	DLW163	2021_09_07_DLW163_20C_herm_1002_Statistics	43.9	spo-11	SYP2GFP	10163300	231510
0.695104	0.65558	MP	Herm	DLW163	2021_09_07_DLW163_20C_herm_1002_Statistics	45.81	spo-11	SYP2GFP	10188400	222406
0.788889	0.761522	LP	Herm	DLW163	2021_09_07_DLW163_20C_herm_1002_Statistics	38.52	spo-11	SYP2GFP	8368270	217245
0.759356	0.728161	LP	Herm	DLW163	2021_09_07_DLW163_20C_herm_1002_Statistics	40.68	spo-11	SYP2GFP	9305040	228737
0.837537	0.816476	LP	Herm	DLW163	2021_09_07_DLW163_20C_herm_1002_Statistics	53.71	spo-11	SYP2GFP	12512700	232968
0.894712	0.881063	LP	Herm	DLW163	2021_09_07_DLW163_20C_herm_1002_Statistics	31.12	spo-11	SYP2GFP	5607800	180199
0.867922	0.8508	LP	Herm	DLW163	2021_09_07_DLW163_20C_herm_1002_Statistics	44.69	spo-11	SYP2GFP	12456200	278725
0.859686	0.841496	LP	Herm	DLW163	2021_09_07_DLW163_20C_herm_1002_Statistics	20.45	spo-11	SYP2GFP	3625340	177278
0.821454	0.798308	LP	Herm	DLW163	2021_09_07_DLW163_20C_herm_1002_Statistics	40.19	spo-11	SYP2GFP	8542600	212555
0.954473	0.948571	LP	Herm	DLW163	2021_09_07_DLW163_20C_herm_1002_Statistics	35.27	spo-11	SYP2GFP	6376250	180784
0.893295	0.879462	LP	Herm	DLW163	2021_09_07_DLW163_20C_herm_1002_Statistics	17.08	spo-11	SYP2GFP	2971210	173958
0.815874	0.792005	LP	Herm	DLW163	2021_09_07_DLW163_20C_herm_1002_Statistics	17.97	spo-11	SYP2GFP	3238840	180236
0.930018	0.920946	LP	Herm	DLW163	2021_09_07_DLW163_20C_herm_1002_Statistics	32.46	spo-11	SYP2GFP	5922610	182459
0.870606	0.853832	LP	Herm	DLW163	2021_09_07_DLW163_20C_herm_1002_Statistics	37.2	spo-11	SYP2GFP	7790720	209428
0.962496	0.957634	LP	Herm	DLW163	2021_09_07_DLW163_20C_herm_1002_Statistics	20.61	spo-11	SYP2GFP	3360110	163033
0.880971	0.865541	LP	Herm	DLW163	2021_09_07_DLW163_20C_herm_1002_Statistics	49.08	spo-11	SYP2GFP	10334100	210556
0.907758	0.895801	LP	Herm	DLW163	2021_09_07_DLW163_20C_herm_1002_Statistics	39.54	spo-11	SYP2GFP	7071100	178834
0.957951	0.9525	LP	Herm	DLW163	2021_09_07_DLW163_20C_herm_1002_Statistics	27.04	spo-11	SYP2GFP	4556890	168524
0.93269	0.923964	LP	Herm	DLW163	2021_09_07_DLW163_20C_herm_1002_Statistics	30.94	spo-11	SYP2GFP	5379590	173872
0.0308693	-0.219875	TZ	Herm	DLW163	2021_09_07_DLW163_20C_herm_1003_Statistics	9.02	spo-11	SYP2GFP	1484170	164542
0.017047	-0.237273	TZ	Herm	DLW163	2021_09_07_DLW163_20C_herm_1003_Statistics	6.18	spo-11	SYP2GFP	935928	151445
0.00733086	-0.249503	TZ	Herm	DLW163	2021_09_07_DLW163_20C_herm_1003_Statistics	6.69	spo-11	SYP2GFP	1075040	160694
0.035029	-0.214639	TZ	Herm	DLW163	2021_09_07_DLW163_20C_herm_1003_Statistics	6.11	spo-11	SYP2GFP	960242	157159
0.0194553	-0.234242	TZ	Herm	DLW163	2021_09_07_DLW163_20C_herm_1003_Statistics	4.91	spo-11	SYP2GFP	825876	168203
0.0904764	-0.144845	TZ	Herm	DLW163	2021_09_07_DLW163_20C_herm_1003_Statistics	7.39	spo-11	SYP2GFP	1242140	168084
0.0413692	-0.206658	TZ	Herm	DLW163	2021_09_07_DLW163_20C_herm_1003_Statistics	6	spo-11	SYP2GFP	877509	146252
0.0637537	-0.178482	TZ	Herm	DLW163	2021_09_07_DLW163_20C_herm_1003_Statistics	9.59	spo-11	SYP2GFP	1589870	165784
0.199192	-0.00800165	TZ	Herm	DLW163	2021_09_07_DLW163_20C_herm_1003_Statistics	8.94	spo-11	SYP2GFP	1581690	176923
0.0506423	-0.194986	TZ	Herm	DLW163	2021_09_07_DLW163_20C_herm_1003_Statistics	6.65	spo-11	SYP2GFP	1040160	156415
0.154052	-0.0648208	TZ	Herm	DLW163	2021_09_07_DLW163_20C_herm_1003_Statistics	14.11	spo-11	SYP2GFP	2591600	183671
0.186732	-0.0236853	TZ	Herm	DLW163	2021_09_07_DLW163_20C_herm_1003_Statistics	8.94	spo-11	SYP2GFP	1656550	185296
0.155251	-0.0633112	TZ	Herm	DLW163	2021_09_07_DLW163_20C_herm_1003_Statistics	14.88	spo-11	SYP2GFP	2712140	182267
0.192109	-0.0169174	TZ	Herm	DLW163	2021_09_07_DLW163_20C_herm_1003_Statistics	17.91	spo-11	SYP2GFP	3268640	182504
0.172012	-0.0422133	TZ	Herm	DLW163	2021_09_07_DLW163_20C_herm_1003_Statistics	13.61	spo-11	SYP2GFP	2331900	171337
0.222443	0.0212651	EP	Herm	DLW163	2021_09_07_DLW163_20C_herm_1003_Statistics	21.37	spo-11	SYP2GFP	4363800	204202
0.213906	0.0105189	EP	Herm	DLW163	2021_09_07_DLW163_20C_herm_1003_Statistics	17.15	spo-11	SYP2GFP	3119380	181888
0.286997	0.102521	EP	Herm	DLW163	2021_09_07_DLW163_20C_herm_1003_Statistics	23.09	spo-11	SYP2GFP	4496820	194752
0.313862	0.136337	EP	Herm	DLW163	2021_09_07_DLW163_20C_herm_1003_Statistics	21.82	spo-11	SYP2GFP	4307030	197389
0.264536	0.0742486	EP	Herm	DLW163	2021_09_07_DLW163_20C_herm_1003_Statistics	18.4	spo-11	SYP2GFP	3300170	179357
0.235336	0.0374946	EP	Herm	DLW163	2021_09_07_DLW163_20C_herm_1003_Statistics	24.2	spo-11	SYP2GFP	4839900	199996
0.276288	0.0890411	EP	Herm	DLW163	2021_09_07_DLW163_20C_herm_1003_Statistics	10.73	spo-11	SYP2GFP	2094570	195207
0.336974	0.165429	EP	Herm	DLW163	2021_09_07_DLW163_20C_herm_1003_Statistics	23.87	spo-11	SYP2GFP	4803160	201222
0.250679	0.0568072	EP	Herm	DLW163	2021_09_07_DLW163_20C_herm_1003_Statistics	20.22	spo-11	SYP2GFP	3750520	185486
0.226284	0.0261006	EP	Herm	DLW163	2021_09_07_DLW163_20C_herm_1003_Statistics	20.77	spo-11	SYP2GFP	4114230	198085
0.365034	0.200749	EP	Herm	DLW163	2021_09_07_DLW163_20C_herm_1003_Statistics	29.98	spo-11	SYP2GFP	6106420	203683
0.391838	0.234488	EP	Herm	DLW163	2021_09_07_DLW163_20C_herm_1003_Statistics	28.73	spo-11	SYP2GFP	5645980	196519
0.236816	0.0393568	EP	Herm	DLW163	2021_09_07_DLW163_20C_herm_1003_Statistics	15.33	spo-11	SYP2GFP	2793360	182215
0.259762	0.0682396	EP	Herm	DLW163	2021_09_07_DLW163_20C_herm_1003_Statistics	11.74	spo-11	SYP2GFP	2238320	190658
0.41645	0.265468	EP	Herm	DLW163	2021_09_07_DLW163_20C_herm_1003_Statistics	30.66	spo-11	SYP2GFP	6215140	202712
0.378165	0.217277	EP	Herm	DLW163	2021_09_07_DLW163_20C_herm_1003_Statistics	25.28	spo-11	SYP2GFP	5079170	200917
0.251629	0.058003	EP	Herm	DLW163	2021_09_07_DLW163_20C_herm_1003_Statistics	20.94	spo-11	SYP2GFP	3890860	185810
0.276654	0.0895023	EP	Herm	DLW163	2021_09_07_DLW163_20C_herm_1003_Statistics	14.46	spo-11	SYP2GFP	2806860	194112
0.384957	0.225827	EP	Herm	DLW163	2021_09_07_DLW163_20C_herm_1003_Statistics	22.26	spo-11	SYP2GFP	4441950	199549
0.361635	0.196471	EP	Herm	DLW163	2021_09_07_DLW163_20C_herm_1003_Statistics	22.07	spo-11	SYP2GFP	4264460	193224
0.451583	0.309691	EP	Herm	DLW163	2021_09_07_DLW163_20C_herm_1003_Statistics	38.81	spo-11	SYP2GFP	8087930	208398
0.401391	0.246512	EP	Herm	DLW163	2021_09_07_DLW163_20C_herm_1003_Statistics	22.91	spo-11	SYP2GFP	4721390	206084
0.327416	0.153397	EP	Herm	DLW163	2021_09_07_DLW163_20C_herm_1003_Statistics	22.46	spo-11	SYP2GFP	4405620	196154
0.485672	0.3526	MP	Herm	DLW163	2021_09_07_DLW163_20C_herm_1003_Statistics	38.24	spo-11	SYP2GFP	8327450	217768
0.470997	0.334128	MP	Herm	DLW163	2021_09_07_DLW163_20C_herm_1003_Statistics	35.34	spo-11	SYP2GFP	7586570	214674
0.433199	0.28655	EP	Herm	DLW163	2021_09_07_DLW163_20C_herm_1003_Statistics	59.81	spo-11	SYP2GFP	12436300	207930
0.406691	0.253184	EP	Herm	DLW163	2021_09_07_DLW163_20C_herm_1003_Statistics	26.9	spo-11	SYP2GFP	5529110	205543
0.479717	0.345104	MP	Herm	DLW163	2021_09_07_DLW163_20C_herm_1003_Statistics	34.45	spo-11	SYP2GFP	7402050	214864
0.415968	0.264861	EP	Herm	DLW163	2021_09_07_DLW163_20C_herm_1003_Statistics	23.81	spo-11	SYP2GFP	4575280	192158
0.455995	0.315244	EP	Herm	DLW163	2021_09_07_DLW163_20C_herm_1003_Statistics	34.3	spo-11	SYP2GFP	7399470	215728
0.430089	0.282636	EP	Herm	DLW163	2021_09_07_DLW163_20C_herm_1003_Statistics	32.64	spo-11	SYP2GFP	6972920	213631
0.391468	0.234022	EP	Herm	DLW163	2021_09_07_DLW163_20C_herm_1003_Statistics	24.36	spo-11	SYP2GFP	4837670	198591
0.460163	0.32049	EP	Herm	DLW163	2021_09_07_DLW163_20C_herm_1003_Statistics	34.08	spo-11	SYP2GFP	6979310	204792
0.466157	0.328035	EP	Herm	DLW163	2021_09_07_DLW163_20C_herm_1003_Statistics	23.17	spo-11	SYP2GFP	4628950	199782
0.440045	0.295167	EP	Herm	DLW163	2021_09_07_DLW163_20C_herm_1003_Statistics	31.68	spo-11	SYP2GFP	6393440	201813
0.485987	0.352996	MP	Herm	DLW163	2021_09_07_DLW163_20C_herm_1003_Statistics	35.07	spo-11	SYP2GFP	7081680	201930
0.500206	0.370894	MP	Herm	DLW163	2021_09_07_DLW163_20C_herm_1003_Statistics	37.26	spo-11	SYP2GFP	8082720	216928
0.529206	0.407398	MP	Herm	DLW163	2021_09_07_DLW163_20C_herm_1003_Statistics	37.36	spo-11	SYP2GFP	8083370	216364
0.489334	0.357209	MP	Herm	DLW163	2021_09_07_DLW163_20C_herm_1003_Statistics	29.03	spo-11	SYP2GFP	6051590	208460
0.556834	0.442173	MP	Herm	DLW163	2021_09_07_DLW163_20C_herm_1003_Statistics	40.1	spo-11	SYP2GFP	9177560	228867
0.50623	0.378477	MP	Herm	DLW163	2021_09_07_DLW163_20C_herm_1003_Statistics	32.17	spo-11	SYP2GFP	7183050	223284
0.528052	0.405945	MP	Herm	DLW163	2021_09_07_DLW163_20C_herm_1003_Statistics	36.02	spo-11	SYP2GFP	8046930	223402
0.511282	0.384835	MP	Herm	DLW163	2021_09_07_DLW163_20C_herm_1003_Statistics	36.28	spo-11	SYP2GFP	7277930	200604
0.561522	0.448074	MP	Herm	DLW163	2021_09_07_DLW163_20C_herm_1003_Statistics	40.31	spo-11	SYP2GFP	8913300	221119
0.652305	0.562346	MP	Herm	DLW163	2021_09_07_DLW163_20C_herm_1003_Statistics	47.27	spo-11	SYP2GFP	11284900	238733
0.600109	0.496644	MP	Herm	DLW163	2021_09_07_DLW163_20C_herm_1003_Statistics	45.1	spo-11	SYP2GFP	10363900	229798
0.621418	0.523467	MP	Herm	DLW163	2021_09_07_DLW163_20C_herm_1003_Statistics	42.4	spo-11	SYP2GFP	10490100	247408
0.56673	0.45463	MP	Herm	DLW163	2021_09_07_DLW163_20C_herm_1003_Statistics	39.51	spo-11	SYP2GFP	8278690	209534
0.592503	0.487071	MP	Herm	DLW163	2021_09_07_DLW163_20C_herm_1003_Statistics	41.88	spo-11	SYP2GFP	10003900	238871
0.684447	0.602804	MP	Herm	DLW163	2021_09_07_DLW163_20C_herm_1003_Statistics	46.77	spo-11	SYP2GFP	11076800	236836
0.661943	0.574477	MP	Herm	DLW163	2021_09_07_DLW163_20C_herm_1003_Statistics	28.89	spo-11	SYP2GFP	5876620	203414
0.633134	0.538214	MP	Herm	DLW163	2021_09_07_DLW163_20C_herm_1003_Statistics	45.82	spo-11	SYP2GFP	10942200	238808
0.698786	0.620853	MP	Herm	DLW163	2021_09_07_DLW163_20C_herm_1003_Statistics	50.34	spo-11	SYP2GFP	10659300	211746
0.604928	0.50271	MP	Herm	DLW163	2021_09_07_DLW163_20C_herm_1003_Statistics	42.66	spo-11	SYP2GFP	9991590	234214
0.695053	0.616154	MP	Herm	DLW163	2021_09_07_DLW163_20C_herm_1003_Statistics	52.49	spo-11	SYP2GFP	12987400	247426
0.632949	0.537982	MP	Herm	DLW163	2021_09_07_DLW163_20C_herm_1003_Statistics	48.86	spo-11	SYP2GFP	12146200	248592
0.666175	0.579804	MP	Herm	DLW163	2021_09_07_DLW163_20C_herm_1003_Statistics	48.5	spo-11	SYP2GFP	12777900	263462
0.717321	0.644183	MP	Herm	DLW163	2021_09_07_DLW163_20C_herm_1003_Statistics	54.97	spo-11	SYP2GFP	13901900	252900
0.51745	0.392599	MP	Herm	DLW163	2021_09_07_DLW163_20C_herm_1003_Statistics	37.66	spo-11	SYP2GFP	8417940	223525
0.546622	0.429319	MP	Herm	DLW163	2021_09_07_DLW163_20C_herm_1003_Statistics	41.22	spo-11	SYP2GFP	8970360	217622
0.611417	0.510879	MP	Herm	DLW163	2021_09_07_DLW163_20C_herm_1003_Statistics	44.94	spo-11	SYP2GFP	11326400	252034
0.584949	0.477563	MP	Herm	DLW163	2021_09_07_DLW163_20C_herm_1003_Statistics	32.62	spo-11	SYP2GFP	7706860	236262
0.671661	0.58671	MP	Herm	DLW163	2021_09_07_DLW163_20C_herm_1003_Statistics	26.27	spo-11	SYP2GFP	5539490	210868
0.641519	0.548769	MP	Herm	DLW163	2021_09_07_DLW163_20C_herm_1003_Statistics	43.63	spo-11	SYP2GFP	10416800	238753
0.703221	0.626435	MP	Herm	DLW163	2021_09_07_DLW163_20C_herm_1003_Statistics	48.42	spo-11	SYP2GFP	12009800	248034
0.775553	0.717482	LP	Herm	DLW163	2021_09_07_DLW163_20C_herm_1003_Statistics	26.26	spo-11	SYP2GFP	5407560	205924
0.746737	0.681211	LP	Herm	DLW163	2021_09_07_DLW163_20C_herm_1003_Statistics	60.15	spo-11	SYP2GFP	15968800	265483
0.731871	0.662497	MP	Herm	DLW163	2021_09_07_DLW163_20C_herm_1003_Statistics	49.12	spo-11	SYP2GFP	12848000	261564
0.805244	0.754855	LP	Herm	DLW163	2021_09_07_DLW163_20C_herm_1003_Statistics	58.18	spo-11	SYP2GFP	14594200	250846
0.792299	0.73856	LP	Herm	DLW163	2021_09_07_DLW163_20C_herm_1003_Statistics	61.48	spo-11	SYP2GFP	16303900	265190
0.759435	0.697194	LP	Herm	DLW163	2021_09_07_DLW163_20C_herm_1003_Statistics	53.06	spo-11	SYP2GFP	13779400	259695
0.778623	0.721345	LP	Herm	DLW163	2021_09_07_DLW163_20C_herm_1003_Statistics	42.97	spo-11	SYP2GFP	10210500	237619
0.859119	0.822669	LP	Herm	DLW163	2021_09_07_DLW163_20C_herm_1003_Statistics	33.86	spo-11	SYP2GFP	6648120	196341
0.751145	0.686758	LP	Herm	DLW163	2021_09_07_DLW163_20C_herm_1003_Statistics	44.64	spo-11	SYP2GFP	11269600	252455
0.825974	0.780949	LP	Herm	DLW163	2021_09_07_DLW163_20C_herm_1003_Statistics	33.48	spo-11	SYP2GFP	6980960	208511
0.836426	0.794104	LP	Herm	DLW163	2021_09_07_DLW163_20C_herm_1003_Statistics	23.07	spo-11	SYP2GFP	4419270	191559
0.807568	0.75778	LP	Herm	DLW163	2021_09_07_DLW163_20C_herm_1003_Statistics	40.1	spo-11	SYP2GFP	10540300	262850
0.896016	0.869113	LP	Herm	DLW163	2021_09_07_DLW163_20C_herm_1003_Statistics	30.22	spo-11	SYP2GFP	5673800	187750
0.796126	0.743378	LP	Herm	DLW163	2021_09_07_DLW163_20C_herm_1003_Statistics	52.56	spo-11	SYP2GFP	12638600	240460
0.8245	0.779092	LP	Herm	DLW163	2021_09_07_DLW163_20C_herm_1003_Statistics	40.36	spo-11	SYP2GFP	9439900	233892
0.867148	0.832775	LP	Herm	DLW163	2021_09_07_DLW163_20C_herm_1003_Statistics	29.67	spo-11	SYP2GFP	5724990	192956
0.851595	0.813198	LP	Herm	DLW163	2021_09_07_DLW163_20C_herm_1003_Statistics	43.75	spo-11	SYP2GFP	9058970	207062
0.932562	0.915114	LP	Herm	DLW163	2021_09_07_DLW163_20C_herm_1003_Statistics	34.7	spo-11	SYP2GFP	6425620	185176
0.852611	0.814476	LP	Herm	DLW163	2021_09_07_DLW163_20C_herm_1003_Statistics	33.02	spo-11	SYP2GFP	6531270	197797
0.879496	0.848318	LP	Herm	DLW163	2021_09_07_DLW163_20C_herm_1003_Statistics	37.07	spo-11	SYP2GFP	7240920	195331
0.983987	0.979844	LP	Herm	DLW163	2021_09_07_DLW163_20C_herm_1003_Statistics	29.34	spo-11	SYP2GFP	5990560	204177
0.944109	0.929649	LP	Herm	DLW163	2021_09_07_DLW163_20C_herm_1003_Statistics	17.5	spo-11	SYP2GFP	3137410	179281
0.976202	0.970045	LP	Herm	DLW163	2021_09_07_DLW163_20C_herm_1003_Statistics	25.03	spo-11	SYP2GFP	4740800	189405
0.996729	0.995882	LP	Herm	DLW163	2021_09_07_DLW163_20C_herm_1003_Statistics	27.67	spo-11	SYP2GFP	6000050	216843
0.728038	0.657674	MP	Herm	DLW163	2021_09_07_DLW163_20C_herm_1003_Statistics	57.67	spo-11	SYP2GFP	14103400	244553
0.759775	0.697622	LP	Herm	DLW163	2021_09_07_DLW163_20C_herm_1003_Statistics	48.96	spo-11	SYP2GFP	12041200	245940
0.115722	-0.02679	TZ	Herm	DLW163	2021_09_07_DLW163_20C_herm_1005_Statistics	23.97	spo-11	SYP2GFP	3967210	165507
0.0884226	-0.0584885	TZ	Herm	DLW163	2021_09_07_DLW163_20C_herm_1005_Statistics	21	spo-11	SYP2GFP	3461370	164827
0.111748	-0.0314039	TZ	Herm	DLW163	2021_09_07_DLW163_20C_herm_1005_Statistics	20.88	spo-11	SYP2GFP	3435220	164522
0.0955915	-0.0501643	TZ	Herm	DLW163	2021_09_07_DLW163_20C_herm_1005_Statistics	23	spo-11	SYP2GFP	3766830	163775
0.0604499	-0.0909694	TZ	Herm	DLW163	2021_09_07_DLW163_20C_herm_1005_Statistics	15.15	spo-11	SYP2GFP	2072570	136803
0.122535	-0.0188785	TZ	Herm	DLW163	2021_09_07_DLW163_20C_herm_1005_Statistics	23.01	spo-11	SYP2GFP	3861850	167834
0.0726853	-0.0767621	TZ	Herm	DLW163	2021_09_07_DLW163_20C_herm_1005_Statistics	22.14	spo-11	SYP2GFP	3639700	164395
0.0339515	-0.121738	TZ	Herm	DLW163	2021_09_07_DLW163_20C_herm_1005_Statistics	10.2	spo-11	SYP2GFP	1536800	150667
0.0885832	-0.0583021	TZ	Herm	DLW163	2021_09_07_DLW163_20C_herm_1005_Statistics	22.63	spo-11	SYP2GFP	3557330	157195
0.100345	-0.0446451	TZ	Herm	DLW163	2021_09_07_DLW163_20C_herm_1005_Statistics	20.18	spo-11	SYP2GFP	3457890	171352
0.048275	-0.105106	TZ	Herm	DLW163	2021_09_07_DLW163_20C_herm_1005_Statistics	12.87	spo-11	SYP2GFP	1843450	143236
0.0519136	-0.100881	TZ	Herm	DLW163	2021_09_07_DLW163_20C_herm_1005_Statistics	11.29	spo-11	SYP2GFP	1633170	144656
0.0645756	-0.0861788	TZ	Herm	DLW163	2021_09_07_DLW163_20C_herm_1005_Statistics	18.22	spo-11	SYP2GFP	3188640	175008
0.0815088	-0.0665166	TZ	Herm	DLW163	2021_09_07_DLW163_20C_herm_1005_Statistics	22.22	spo-11	SYP2GFP	3377360	151996
0.0506767	-0.102318	TZ	Herm	DLW163	2021_09_07_DLW163_20C_herm_1005_Statistics	13.22	spo-11	SYP2GFP	1987440	150336
0.0328428	-0.123026	TZ	Herm	DLW163	2021_09_07_DLW163_20C_herm_1005_Statistics	14.73	spo-11	SYP2GFP	2112850	143439
0.0650697	-0.085605	TZ	Herm	DLW163	2021_09_07_DLW163_20C_herm_1005_Statistics	21.63	spo-11	SYP2GFP	3417370	157992
0.238023	0.115221	EP	Herm	DLW163	2021_09_07_DLW163_20C_herm_1005_Statistics	32.36	spo-11	SYP2GFP	5285780	163343
0.174654	0.0416398	EP	Herm	DLW163	2021_09_07_DLW163_20C_herm_1005_Statistics	23.41	spo-11	SYP2GFP	3906400	166869
0.212233	0.0852753	EP	Herm	DLW163	2021_09_07_DLW163_20C_herm_1005_Statistics	17.18	spo-11	SYP2GFP	2731000	158964
0.149161	0.0120389	EP	Herm	DLW163	2021_09_07_DLW163_20C_herm_1005_Statistics	26.69	spo-11	SYP2GFP	4715160	176664
0.190626	0.0601857	EP	Herm	DLW163	2021_09_07_DLW163_20C_herm_1005_Statistics	27.6	spo-11	SYP2GFP	4519250	163741
0.16353	0.0287235	EP	Herm	DLW163	2021_09_07_DLW163_20C_herm_1005_Statistics	22.41	spo-11	SYP2GFP	3978520	177533
0.201723	0.0730721	EP	Herm	DLW163	2021_09_07_DLW163_20C_herm_1005_Statistics	16.84	spo-11	SYP2GFP	2880310	171040
0.220798	0.0952206	EP	Herm	DLW163	2021_09_07_DLW163_20C_herm_1005_Statistics	27.4	spo-11	SYP2GFP	4900440	178848
0.228991	0.104734	EP	Herm	DLW163	2021_09_07_DLW163_20C_herm_1005_Statistics	29.88	spo-11	SYP2GFP	5265340	176216
0.202796	0.0743175	EP	Herm	DLW163	2021_09_07_DLW163_20C_herm_1005_Statistics	19.67	spo-11	SYP2GFP	3752370	190766
0.180466	0.0483884	EP	Herm	DLW163	2021_09_07_DLW163_20C_herm_1005_Statistics	32.83	spo-11	SYP2GFP	5314070	161866
0.140199	0.00163209	EP	Herm	DLW163	2021_09_07_DLW163_20C_herm_1005_Statistics	26.95	spo-11	SYP2GFP	4262030	158146
0.157524	0.0217491	EP	Herm	DLW163	2021_09_07_DLW163_20C_herm_1005_Statistics	23.36	spo-11	SYP2GFP	4589900	196485
0.220443	0.0948086	EP	Herm	DLW163	2021_09_07_DLW163_20C_herm_1005_Statistics	8.44	spo-11	SYP2GFP	1344030	159245
0.245304	0.123676	EP	Herm	DLW163	2021_09_07_DLW163_20C_herm_1005_Statistics	33.31	spo-11	SYP2GFP	5524950	165865
0.312643	0.201867	EP	Herm	DLW163	2021_09_07_DLW163_20C_herm_1005_Statistics	38.42	spo-11	SYP2GFP	7523250	195816
0.287745	0.172957	EP	Herm	DLW163	2021_09_07_DLW163_20C_herm_1005_Statistics	30.53	spo-11	SYP2GFP	5465510	179021
0.269268	0.151502	EP	Herm	DLW163	2021_09_07_DLW163_20C_herm_1005_Statistics	28.06	spo-11	SYP2GFP	4763920	169776
0.331367	0.223609	EP	Herm	DLW163	2021_09_07_DLW163_20C_herm_1005_Statistics	37.45	spo-11	SYP2GFP	7179750	191716
0.379186	0.279135	EP	Herm	DLW163	2021_09_07_DLW163_20C_herm_1005_Statistics	43.52	spo-11	SYP2GFP	8916220	204876
0.396626	0.299385	EP	Herm	DLW163	2021_09_07_DLW163_20C_herm_1005_Statistics	44.86	spo-11	SYP2GFP	8986930	200333
0.370051	0.268528	EP	Herm	DLW163	2021_09_07_DLW163_20C_herm_1005_Statistics	40.67	spo-11	SYP2GFP	7973860	196062
0.328633	0.220435	EP	Herm	DLW163	2021_09_07_DLW163_20C_herm_1005_Statistics	36.67	spo-11	SYP2GFP	6628800	180769
0.260831	0.141706	EP	Herm	DLW163	2021_09_07_DLW163_20C_herm_1005_Statistics	28	spo-11	SYP2GFP	4695770	167706
0.27894	0.162733	EP	Herm	DLW163	2021_09_07_DLW163_20C_herm_1005_Statistics	30.89	spo-11	SYP2GFP	5172160	167438
0.302297	0.189854	EP	Herm	DLW163	2021_09_07_DLW163_20C_herm_1005_Statistics	38.17	spo-11	SYP2GFP	6668020	174693
0.408654	0.313352	EP	Herm	DLW163	2021_09_07_DLW163_20C_herm_1005_Statistics	44.36	spo-11	SYP2GFP	8982020	202480
0.349239	0.244361	EP	Herm	DLW163	2021_09_07_DLW163_20C_herm_1005_Statistics	38.49	spo-11	SYP2GFP	7315640	190066
0.387005	0.288214	EP	Herm	DLW163	2021_09_07_DLW163_20C_herm_1005_Statistics	28.5	spo-11	SYP2GFP	5888360	206609
0.247395	0.126104	EP	Herm	DLW163	2021_09_07_DLW163_20C_herm_1005_Statistics	30.44	spo-11	SYP2GFP	5583450	183425
0.314158	0.203627	EP	Herm	DLW163	2021_09_07_DLW163_20C_herm_1005_Statistics	35.76	spo-11	SYP2GFP	6373310	178225
0.351845	0.247387	EP	Herm	DLW163	2021_09_07_DLW163_20C_herm_1005_Statistics	37.01	spo-11	SYP2GFP	6757620	182589
0.330962	0.223139	EP	Herm	DLW163	2021_09_07_DLW163_20C_herm_1005_Statistics	37.48	spo-11	SYP2GFP	6858610	182994
0.369314	0.267672	EP	Herm	DLW163	2021_09_07_DLW163_20C_herm_1005_Statistics	41.23	spo-11	SYP2GFP	7942380	192636
0.290833	0.176543	EP	Herm	DLW163	2021_09_07_DLW163_20C_herm_1005_Statistics	37.07	spo-11	SYP2GFP	6603050	178124
0.267825	0.149826	EP	Herm	DLW163	2021_09_07_DLW163_20C_herm_1005_Statistics	34.17	spo-11	SYP2GFP	6035920	176644
0.378445	0.278275	EP	Herm	DLW163	2021_09_07_DLW163_20C_herm_1005_Statistics	37.8	spo-11	SYP2GFP	6975960	184549
0.358997	0.255692	EP	Herm	DLW163	2021_09_07_DLW163_20C_herm_1005_Statistics	39.58	spo-11	SYP2GFP	7493850	189334
0.338936	0.232398	EP	Herm	DLW163	2021_09_07_DLW163_20C_herm_1005_Statistics	41.15	spo-11	SYP2GFP	7907200	192156
0.322734	0.213584	EP	Herm	DLW163	2021_09_07_DLW163_20C_herm_1005_Statistics	44.26	spo-11	SYP2GFP	7438230	168058
0.350879	0.246265	EP	Herm	DLW163	2021_09_07_DLW163_20C_herm_1005_Statistics	41.65	spo-11	SYP2GFP	7465940	179254
0.447154	0.358057	MP	Herm	DLW163	2021_09_07_DLW163_20C_herm_1005_Statistics	39.73	spo-11	SYP2GFP	8425540	212070
0.419184	0.325578	EP	Herm	DLW163	2021_09_07_DLW163_20C_herm_1005_Statistics	44.24	spo-11	SYP2GFP	9033480	204193
0.432799	0.341388	MP	Herm	DLW163	2021_09_07_DLW163_20C_herm_1005_Statistics	45.73	spo-11	SYP2GFP	9542050	208661
0.500679	0.420208	MP	Herm	DLW163	2021_09_07_DLW163_20C_herm_1005_Statistics	40.86	spo-11	SYP2GFP	9102900	222783
0.459864	0.372815	MP	Herm	DLW163	2021_09_07_DLW163_20C_herm_1005_Statistics	44.6	spo-11	SYP2GFP	9342570	209475
0.48526	0.402304	MP	Herm	DLW163	2021_09_07_DLW163_20C_herm_1005_Statistics	44.26	spo-11	SYP2GFP	9649560	218020
0.44601	0.356729	MP	Herm	DLW163	2021_09_07_DLW163_20C_herm_1005_Statistics	39.17	spo-11	SYP2GFP	8425200	215093
0.467883	0.382127	MP	Herm	DLW163	2021_09_07_DLW163_20C_herm_1005_Statistics	42.11	spo-11	SYP2GFP	9002740	213791
0.506309	0.426745	MP	Herm	DLW163	2021_09_07_DLW163_20C_herm_1005_Statistics	40.42	spo-11	SYP2GFP	8948320	221383
0.490632	0.408541	MP	Herm	DLW163	2021_09_07_DLW163_20C_herm_1005_Statistics	32.75	spo-11	SYP2GFP	6939460	211892
0.450551	0.362001	MP	Herm	DLW163	2021_09_07_DLW163_20C_herm_1005_Statistics	39.46	spo-11	SYP2GFP	8186480	207463
0.471303	0.386097	MP	Herm	DLW163	2021_09_07_DLW163_20C_herm_1005_Statistics	35.31	spo-11	SYP2GFP	7006520	198429
0.438993	0.34858	MP	Herm	DLW163	2021_09_07_DLW163_20C_herm_1005_Statistics	38.79	spo-11	SYP2GFP	7468030	192525
0.418698	0.325015	EP	Herm	DLW163	2021_09_07_DLW163_20C_herm_1005_Statistics	43.49	spo-11	SYP2GFP	8154960	187513
0.481061	0.397428	MP	Herm	DLW163	2021_09_07_DLW163_20C_herm_1005_Statistics	23.52	spo-11	SYP2GFP	5478730	232939
0.501045	0.420632	MP	Herm	DLW163	2021_09_07_DLW163_20C_herm_1005_Statistics	39.38	spo-11	SYP2GFP	8790540	223223
0.460422	0.373462	MP	Herm	DLW163	2021_09_07_DLW163_20C_herm_1005_Statistics	43.24	spo-11	SYP2GFP	8811960	203792
0.556974	0.485575	MP	Herm	DLW163	2021_09_07_DLW163_20C_herm_1005_Statistics	40.05	spo-11	SYP2GFP	9195560	229602
0.540522	0.466471	MP	Herm	DLW163	2021_09_07_DLW163_20C_herm_1005_Statistics	35.04	spo-11	SYP2GFP	8195310	233884
0.570504	0.501286	MP	Herm	DLW163	2021_09_07_DLW163_20C_herm_1005_Statistics	44.8	spo-11	SYP2GFP	10628200	237237
0.516914	0.43906	MP	Herm	DLW163	2021_09_07_DLW163_20C_herm_1005_Statistics	27.73	spo-11	SYP2GFP	5593700	201720
0.567561	0.497869	MP	Herm	DLW163	2021_09_07_DLW163_20C_herm_1005_Statistics	45.09	spo-11	SYP2GFP	10582600	234699
0.561677	0.491037	MP	Herm	DLW163	2021_09_07_DLW163_20C_herm_1005_Statistics	28.39	spo-11	SYP2GFP	6654130	234383
0.583437	0.516303	MP	Herm	DLW163	2021_09_07_DLW163_20C_herm_1005_Statistics	34.45	spo-11	SYP2GFP	8460180	245579
0.543856	0.470343	MP	Herm	DLW163	2021_09_07_DLW163_20C_herm_1005_Statistics	35.75	spo-11	SYP2GFP	8575240	239867
0.579816	0.512099	MP	Herm	DLW163	2021_09_07_DLW163_20C_herm_1005_Statistics	36.06	spo-11	SYP2GFP	9892780	274342
0.586521	0.519884	MP	Herm	DLW163	2021_09_07_DLW163_20C_herm_1005_Statistics	27.28	spo-11	SYP2GFP	5665200	207669
0.538239	0.463821	MP	Herm	DLW163	2021_09_07_DLW163_20C_herm_1005_Statistics	27.06	spo-11	SYP2GFP	6322320	233641
0.627371	0.567318	MP	Herm	DLW163	2021_09_07_DLW163_20C_herm_1005_Statistics	46.01	spo-11	SYP2GFP	11120700	241702
0.653884	0.598104	MP	Herm	DLW163	2021_09_07_DLW163_20C_herm_1005_Statistics	62.92	spo-11	SYP2GFP	15999000	254275
0.681511	0.630182	MP	Herm	DLW163	2021_09_07_DLW163_20C_herm_1005_Statistics	46.5	spo-11	SYP2GFP	12065400	259471
0.741623	0.699983	LP	Herm	DLW163	2021_09_07_DLW163_20C_herm_1005_Statistics	69.54	spo-11	SYP2GFP	19490400	280276
0.65905	0.604102	MP	Herm	DLW163	2021_09_07_DLW163_20C_herm_1005_Statistics	51.14	spo-11	SYP2GFP	13173600	257599
0.633072	0.573937	MP	Herm	DLW163	2021_09_07_DLW163_20C_herm_1005_Statistics	51.22	spo-11	SYP2GFP	12974200	253303
0.606911	0.54356	MP	Herm	DLW163	2021_09_07_DLW163_20C_herm_1005_Statistics	43.35	spo-11	SYP2GFP	10650700	245691
0.627998	0.568045	MP	Herm	DLW163	2021_09_07_DLW163_20C_herm_1005_Statistics	50.74	spo-11	SYP2GFP	12440200	245175
0.679093	0.627375	MP	Herm	DLW163	2021_09_07_DLW163_20C_herm_1005_Statistics	58.36	spo-11	SYP2GFP	15612600	267522
0.740179	0.698306	LP	Herm	DLW163	2021_09_07_DLW163_20C_herm_1005_Statistics	35.53	spo-11	SYP2GFP	6981100	196485
0.698453	0.649855	MP	Herm	DLW163	2021_09_07_DLW163_20C_herm_1005_Statistics	50.08	spo-11	SYP2GFP	13216100	263900
0.768329	0.730993	LP	Herm	DLW163	2021_09_07_DLW163_20C_herm_1005_Statistics	30.07	spo-11	SYP2GFP	5715050	190058
0.794629	0.761531	LP	Herm	DLW163	2021_09_07_DLW163_20C_herm_1005_Statistics	55.22	spo-11	SYP2GFP	12917300	233924
0.818564	0.789323	LP	Herm	DLW163	2021_09_07_DLW163_20C_herm_1005_Statistics	65.18	spo-11	SYP2GFP	14964200	229583
0.721763	0.676922	LP	Herm	DLW163	2021_09_07_DLW163_20C_herm_1005_Statistics	59.15	spo-11	SYP2GFP	16150600	273045
0.614752	0.552665	MP	Herm	DLW163	2021_09_07_DLW163_20C_herm_1005_Statistics	46.3	spo-11	SYP2GFP	10915500	235756
0.758426	0.719493	LP	Herm	DLW163	2021_09_07_DLW163_20C_herm_1005_Statistics	50.39	spo-11	SYP2GFP	11979100	237728
0.634504	0.5756	MP	Herm	DLW163	2021_09_07_DLW163_20C_herm_1005_Statistics	35.36	spo-11	SYP2GFP	8262960	233681
0.655476	0.599952	MP	Herm	DLW163	2021_09_07_DLW163_20C_herm_1005_Statistics	50.96	spo-11	SYP2GFP	11884200	233206
0.781678	0.746493	LP	Herm	DLW163	2021_09_07_DLW163_20C_herm_1005_Statistics	51.33	spo-11	SYP2GFP	11759200	229090
0.713502	0.667329	LP	Herm	DLW163	2021_09_07_DLW163_20C_herm_1005_Statistics	52.45	spo-11	SYP2GFP	14002200	266963
0.811453	0.781067	LP	Herm	DLW163	2021_09_07_DLW163_20C_herm_1005_Statistics	38.52	spo-11	SYP2GFP	7274140	188841
0.663671	0.609468	MP	Herm	DLW163	2021_09_07_DLW163_20C_herm_1005_Statistics	50.22	spo-11	SYP2GFP	11473600	228467
0.771689	0.734894	LP	Herm	DLW163	2021_09_07_DLW163_20C_herm_1005_Statistics	56.2	spo-11	SYP2GFP	13443000	239199
0.704068	0.656376	MP	Herm	DLW163	2021_09_07_DLW163_20C_herm_1005_Statistics	33.38	spo-11	SYP2GFP	7552710	226265
0.835774	0.809307	LP	Herm	DLW163	2021_09_07_DLW163_20C_herm_1005_Statistics	51.73	spo-11	SYP2GFP	10463600	202273
0.677306	0.6253	MP	Herm	DLW163	2021_09_07_DLW163_20C_herm_1005_Statistics	52.62	spo-11	SYP2GFP	12912600	245393
0.820466	0.791532	LP	Herm	DLW163	2021_09_07_DLW163_20C_herm_1005_Statistics	48.15	spo-11	SYP2GFP	10232700	212517
0.691873	0.642215	MP	Herm	DLW163	2021_09_07_DLW163_20C_herm_1005_Statistics	38.17	spo-11	SYP2GFP	8123020	212812
0.796425	0.763616	LP	Herm	DLW163	2021_09_07_DLW163_20C_herm_1005_Statistics	51.91	spo-11	SYP2GFP	12292700	236808
0.727634	0.683739	LP	Herm	DLW163	2021_09_07_DLW163_20C_herm_1005_Statistics	43.19	spo-11	SYP2GFP	10140300	234784
0.78638	0.751953	LP	Herm	DLW163	2021_09_07_DLW163_20C_herm_1005_Statistics	43.91	spo-11	SYP2GFP	9817100	223573
0.766838	0.729261	LP	Herm	DLW163	2021_09_07_DLW163_20C_herm_1005_Statistics	33.6	spo-11	SYP2GFP	7500120	223218
0.743792	0.702501	LP	Herm	DLW163	2021_09_07_DLW163_20C_herm_1005_Statistics	54.26	spo-11	SYP2GFP	12431500	229110
0.594152	0.528745	MP	Herm	DLW163	2021_09_07_DLW163_20C_herm_1005_Statistics	47.33	spo-11	SYP2GFP	10759100	227321
0.615739	0.553811	MP	Herm	DLW163	2021_09_07_DLW163_20C_herm_1005_Statistics	33.75	spo-11	SYP2GFP	7713550	228550
0.846105	0.821303	LP	Herm	DLW163	2021_09_07_DLW163_20C_herm_1005_Statistics	58.77	spo-11	SYP2GFP	11910700	202666
0.89411	0.877044	LP	Herm	DLW163	2021_09_07_DLW163_20C_herm_1005_Statistics	37.51	spo-11	SYP2GFP	6240170	166360
0.914529	0.900754	LP	Herm	DLW163	2021_09_07_DLW163_20C_herm_1005_Statistics	41.53	spo-11	SYP2GFP	6717650	161754
0.869202	0.848122	LP	Herm	DLW163	2021_09_07_DLW163_20C_herm_1005_Statistics	37.59	spo-11	SYP2GFP	6193690	164770
0.856771	0.833688	LP	Herm	DLW163	2021_09_07_DLW163_20C_herm_1005_Statistics	19.8	spo-11	SYP2GFP	3236690	163469
0.937668	0.927623	LP	Herm	DLW163	2021_09_07_DLW163_20C_herm_1005_Statistics	40.32	spo-11	SYP2GFP	6975000	172991
0.84565	0.820774	LP	Herm	DLW163	2021_09_07_DLW163_20C_herm_1005_Statistics	26.79	spo-11	SYP2GFP	4441990	165808
0.955973	0.948878	LP	Herm	DLW163	2021_09_07_DLW163_20C_herm_1005_Statistics	47.31	spo-11	SYP2GFP	7838990	165694
0.875274	0.855173	LP	Herm	DLW163	2021_09_07_DLW163_20C_herm_1005_Statistics	43.47	spo-11	SYP2GFP	7672230	176495
0.978221	0.974711	LP	Herm	DLW163	2021_09_07_DLW163_20C_herm_1005_Statistics	42.27	spo-11	SYP2GFP	7678460	181653
0.865494	0.843816	LP	Herm	DLW163	2021_09_07_DLW163_20C_herm_1005_Statistics	33.14	spo-11	SYP2GFP	5294920	159774
0.921632	0.909002	LP	Herm	DLW163	2021_09_07_DLW163_20C_herm_1005_Statistics	50.93	spo-11	SYP2GFP	9222950	181091
0.900396	0.884344	LP	Herm	DLW163	2021_09_07_DLW163_20C_herm_1005_Statistics	35.84	spo-11	SYP2GFP	5749440	160420
0.945714	0.936965	LP	Herm	DLW163	2021_09_07_DLW163_20C_herm_1005_Statistics	32.18	spo-11	SYP2GFP	5219460	162196
0.966362	0.96094	LP	Herm	DLW163	2021_09_07_DLW163_20C_herm_1005_Statistics	40.69	spo-11	SYP2GFP	6878310	169042
0.910701	0.896309	LP	Herm	DLW163	2021_09_07_DLW163_20C_herm_1005_Statistics	41.13	spo-11	SYP2GFP	6739350	163855
0.89018	0.872481	LP	Herm	DLW163	2021_09_07_DLW163_20C_herm_1005_Statistics	30.47	spo-11	SYP2GFP	4776820	156771
0.929075	0.917645	LP	Herm	DLW163	2021_09_07_DLW163_20C_herm_1005_Statistics	28.99	spo-11	SYP2GFP	4058990	140013
0.984093	0.981529	LP	Herm	DLW163	2021_09_07_DLW163_20C_herm_1005_Statistics	41.42	spo-11	SYP2GFP	6964930	168154
0.952394	0.944722	LP	Herm	DLW163	2021_09_07_DLW163_20C_herm_1005_Statistics	41.62	spo-11	SYP2GFP	5972590	143503
0.0367674	-0.103911	TZ	Herm	DLW163	2021_09_07_DLW163_20C_herm_1006_Statistics	15.4	spo-11	SYP2GFP	2262030	146885
0.0224107	-0.120365	TZ	Herm	DLW163	2021_09_07_DLW163_20C_herm_1006_Statistics	13.19	spo-11	SYP2GFP	1882350	142710
0.0500321	-0.0887093	TZ	Herm	DLW163	2021_09_07_DLW163_20C_herm_1006_Statistics	13.89	spo-11	SYP2GFP	2155770	155203
0.0240099	-0.118532	TZ	Herm	DLW163	2021_09_07_DLW163_20C_herm_1006_Statistics	11.7	spo-11	SYP2GFP	1664530	142268
0.0699079	-0.0659306	TZ	Herm	DLW163	2021_09_07_DLW163_20C_herm_1006_Statistics	16.8	spo-11	SYP2GFP	2726960	162319
0.0379244	-0.102585	TZ	Herm	DLW163	2021_09_07_DLW163_20C_herm_1006_Statistics	13.59	spo-11	SYP2GFP	2032130	149531
0.0627092	-0.0741807	TZ	Herm	DLW163	2021_09_07_DLW163_20C_herm_1006_Statistics	12.77	spo-11	SYP2GFP	2033640	159251
0.0745914	-0.0605631	TZ	Herm	DLW163	2021_09_07_DLW163_20C_herm_1006_Statistics	13.77	spo-11	SYP2GFP	2483100	180327
0.113095	-0.0164362	TZ	Herm	DLW163	2021_09_07_DLW163_20C_herm_1006_Statistics	13.97	spo-11	SYP2GFP	2229910	159621
0.0944849	-0.0377642	TZ	Herm	DLW163	2021_09_07_DLW163_20C_herm_1006_Statistics	18.47	spo-11	SYP2GFP	2958160	160160
0.0809045	-0.0533281	TZ	Herm	DLW163	2021_09_07_DLW163_20C_herm_1006_Statistics	13.29	spo-11	SYP2GFP	2310750	173871
0.0933107	-0.0391099	TZ	Herm	DLW163	2021_09_07_DLW163_20C_herm_1006_Statistics	14.4	spo-11	SYP2GFP	2277950	158191
0.0792808	-0.0551888	TZ	Herm	DLW163	2021_09_07_DLW163_20C_herm_1006_Statistics	14.36	spo-11	SYP2GFP	2309920	160858
0.0559042	-0.0819796	TZ	Herm	DLW163	2021_09_07_DLW163_20C_herm_1006_Statistics	10.87	spo-11	SYP2GFP	1577120	145089
0.158384	0.0354676	EP	Herm	DLW163	2021_09_07_DLW163_20C_herm_1006_Statistics	21.4	spo-11	SYP2GFP	3519960	164484
0.168605	0.0471806	EP	Herm	DLW163	2021_09_07_DLW163_20C_herm_1006_Statistics	19.62	spo-11	SYP2GFP	3266350	166481
0.139417	0.0137301	EP	Herm	DLW163	2021_09_07_DLW163_20C_herm_1006_Statistics	21.96	spo-11	SYP2GFP	3627250	165175
0.178401	0.0584082	EP	Herm	DLW163	2021_09_07_DLW163_20C_herm_1006_Statistics	26.63	spo-11	SYP2GFP	4432480	166447
0.153056	0.0293608	EP	Herm	DLW163	2021_09_07_DLW163_20C_herm_1006_Statistics	20.28	spo-11	SYP2GFP	3451780	170206
0.150037	0.0259007	EP	Herm	DLW163	2021_09_07_DLW163_20C_herm_1006_Statistics	45.24	spo-11	SYP2GFP	7707770	170375
0.180181	0.0604477	EP	Herm	DLW163	2021_09_07_DLW163_20C_herm_1006_Statistics	15.02	spo-11	SYP2GFP	2630440	175129
0.18708	0.0683537	EP	Herm	DLW163	2021_09_07_DLW163_20C_herm_1006_Statistics	22.98	spo-11	SYP2GFP	4031490	175435
0.189166	0.0707451	EP	Herm	DLW163	2021_09_07_DLW163_20C_herm_1006_Statistics	21.63	spo-11	SYP2GFP	3713350	171676
0.197683	0.0805057	EP	Herm	DLW163	2021_09_07_DLW163_20C_herm_1006_Statistics	31.37	spo-11	SYP2GFP	5733220	182761
0.165284	0.0433754	EP	Herm	DLW163	2021_09_07_DLW163_20C_herm_1006_Statistics	16.14	spo-11	SYP2GFP	2870100	177825
0.127482	5.15842e-05	EP	Herm	DLW163	2021_09_07_DLW163_20C_herm_1006_Statistics	21.99	spo-11	SYP2GFP	3750160	170539
0.215213	0.100597	EP	Herm	DLW163	2021_09_07_DLW163_20C_herm_1006_Statistics	27.64	spo-11	SYP2GFP	4840870	175140
0.275279	0.169434	EP	Herm	DLW163	2021_09_07_DLW163_20C_herm_1006_Statistics	24.57	spo-11	SYP2GFP	4214990	171550
0.229071	0.116478	EP	Herm	DLW163	2021_09_07_DLW163_20C_herm_1006_Statistics	28.16	spo-11	SYP2GFP	5023950	178407
0.263619	0.156072	EP	Herm	DLW163	2021_09_07_DLW163_20C_herm_1006_Statistics	26.7	spo-11	SYP2GFP	4584070	171688
0.235994	0.124412	EP	Herm	DLW163	2021_09_07_DLW163_20C_herm_1006_Statistics	27.42	spo-11	SYP2GFP	4918640	179381
0.222315	0.108735	EP	Herm	DLW163	2021_09_07_DLW163_20C_herm_1006_Statistics	31.26	spo-11	SYP2GFP	5502430	176021
0.265582	0.158321	EP	Herm	DLW163	2021_09_07_DLW163_20C_herm_1006_Statistics	22.65	spo-11	SYP2GFP	4202570	185544
0.248287	0.1385	EP	Herm	DLW163	2021_09_07_DLW163_20C_herm_1006_Statistics	22.54	spo-11	SYP2GFP	3665420	162618
0.341064	0.244828	EP	Herm	DLW163	2021_09_07_DLW163_20C_herm_1006_Statistics	27.79	spo-11	SYP2GFP	5552580	199805
0.372053	0.280342	EP	Herm	DLW163	2021_09_07_DLW163_20C_herm_1006_Statistics	39.33	spo-11	SYP2GFP	7548590	191930
0.301227	0.199172	EP	Herm	DLW163	2021_09_07_DLW163_20C_herm_1006_Statistics	27.58	spo-11	SYP2GFP	5157970	187018
0.321734	0.222674	EP	Herm	DLW163	2021_09_07_DLW163_20C_herm_1006_Statistics	27.58	spo-11	SYP2GFP	4861250	176260
0.304424	0.202837	EP	Herm	DLW163	2021_09_07_DLW163_20C_herm_1006_Statistics	26.29	spo-11	SYP2GFP	5047700	192001
0.351585	0.256885	EP	Herm	DLW163	2021_09_07_DLW163_20C_herm_1006_Statistics	36.59	spo-11	SYP2GFP	7423640	202887
0.306664	0.205403	EP	Herm	DLW163	2021_09_07_DLW163_20C_herm_1006_Statistics	21.61	spo-11	SYP2GFP	4064310	188075
0.364446	0.271625	EP	Herm	DLW163	2021_09_07_DLW163_20C_herm_1006_Statistics	40.14	spo-11	SYP2GFP	8059830	200793
0.348345	0.253172	EP	Herm	DLW163	2021_09_07_DLW163_20C_herm_1006_Statistics	24	spo-11	SYP2GFP	4188980	174541
0.360911	0.267573	EP	Herm	DLW163	2021_09_07_DLW163_20C_herm_1006_Statistics	35.46	spo-11	SYP2GFP	6708060	189173
0.317424	0.217735	EP	Herm	DLW163	2021_09_07_DLW163_20C_herm_1006_Statistics	29.19	spo-11	SYP2GFP	5372850	184065
0.383467	0.293424	EP	Herm	DLW163	2021_09_07_DLW163_20C_herm_1006_Statistics	26.28	spo-11	SYP2GFP	5264450	200322
0.422805	0.338506	MP	Herm	DLW163	2021_09_07_DLW163_20C_herm_1006_Statistics	23.04	spo-11	SYP2GFP	4342210	188464
0.438012	0.355935	MP	Herm	DLW163	2021_09_07_DLW163_20C_herm_1006_Statistics	38.56	spo-11	SYP2GFP	8102930	210138
0.462398	0.383882	MP	Herm	DLW163	2021_09_07_DLW163_20C_herm_1006_Statistics	38.01	spo-11	SYP2GFP	8260550	217326
0.453795	0.374023	MP	Herm	DLW163	2021_09_07_DLW163_20C_herm_1006_Statistics	25.23	spo-11	SYP2GFP	5314220	210631
0.442225	0.360763	MP	Herm	DLW163	2021_09_07_DLW163_20C_herm_1006_Statistics	41.45	spo-11	SYP2GFP	9309260	224590
0.469126	0.391592	MP	Herm	DLW163	2021_09_07_DLW163_20C_herm_1006_Statistics	43.89	spo-11	SYP2GFP	9948330	226665
0.56803	0.504942	MP	Herm	DLW163	2021_09_07_DLW163_20C_herm_1006_Statistics	44.61	spo-11	SYP2GFP	9958320	223231
0.561836	0.497843	MP	Herm	DLW163	2021_09_07_DLW163_20C_herm_1006_Statistics	46.01	spo-11	SYP2GFP	10029800	217992
0.551651	0.48617	MP	Herm	DLW163	2021_09_07_DLW163_20C_herm_1006_Statistics	52.19	spo-11	SYP2GFP	12495700	239427
0.590022	0.530145	MP	Herm	DLW163	2021_09_07_DLW163_20C_herm_1006_Statistics	47.82	spo-11	SYP2GFP	11269600	235667
0.531506	0.463083	MP	Herm	DLW163	2021_09_07_DLW163_20C_herm_1006_Statistics	46.81	spo-11	SYP2GFP	10603700	226526
0.578529	0.516974	MP	Herm	DLW163	2021_09_07_DLW163_20C_herm_1006_Statistics	49.61	spo-11	SYP2GFP	12462200	251203
0.560531	0.496347	MP	Herm	DLW163	2021_09_07_DLW163_20C_herm_1006_Statistics	49.97	spo-11	SYP2GFP	12268600	245519
0.590643	0.530857	MP	Herm	DLW163	2021_09_07_DLW163_20C_herm_1006_Statistics	51.75	spo-11	SYP2GFP	13262400	256278
0.491079	0.416751	MP	Herm	DLW163	2021_09_07_DLW163_20C_herm_1006_Statistics	38.72	spo-11	SYP2GFP	8058520	208123
0.516687	0.446099	MP	Herm	DLW163	2021_09_07_DLW163_20C_herm_1006_Statistics	39.33	spo-11	SYP2GFP	8742540	222287
0.482749	0.407206	MP	Herm	DLW163	2021_09_07_DLW163_20C_herm_1006_Statistics	39.54	spo-11	SYP2GFP	8973800	226955
0.505795	0.433617	MP	Herm	DLW163	2021_09_07_DLW163_20C_herm_1006_Statistics	42.67	spo-11	SYP2GFP	9915190	232369
0.477674	0.401389	MP	Herm	DLW163	2021_09_07_DLW163_20C_herm_1006_Statistics	21.77	spo-11	SYP2GFP	4358590	200211
0.499664	0.426591	MP	Herm	DLW163	2021_09_07_DLW163_20C_herm_1006_Statistics	45.99	spo-11	SYP2GFP	10159600	220909
0.504026	0.43159	MP	Herm	DLW163	2021_09_07_DLW163_20C_herm_1006_Statistics	43.22	spo-11	SYP2GFP	9852900	227971
0.541237	0.474235	MP	Herm	DLW163	2021_09_07_DLW163_20C_herm_1006_Statistics	43.25	spo-11	SYP2GFP	10180700	235392
0.533819	0.465734	MP	Herm	DLW163	2021_09_07_DLW163_20C_herm_1006_Statistics	44.44	spo-11	SYP2GFP	10020300	225479
0.524368	0.454903	MP	Herm	DLW163	2021_09_07_DLW163_20C_herm_1006_Statistics	42.78	spo-11	SYP2GFP	9730830	227462
0.62512	0.570369	MP	Herm	DLW163	2021_09_07_DLW163_20C_herm_1006_Statistics	57.93	spo-11	SYP2GFP	13421700	231688
0.605194	0.547533	MP	Herm	DLW163	2021_09_07_DLW163_20C_herm_1006_Statistics	53.93	spo-11	SYP2GFP	13116600	243215
0.637466	0.584518	MP	Herm	DLW163	2021_09_07_DLW163_20C_herm_1006_Statistics	35.59	spo-11	SYP2GFP	7432160	208827
0.664506	0.615507	MP	Herm	DLW163	2021_09_07_DLW163_20C_herm_1006_Statistics	52.7	spo-11	SYP2GFP	12692900	240852
0.681112	0.634539	MP	Herm	DLW163	2021_09_07_DLW163_20C_herm_1006_Statistics	46.77	spo-11	SYP2GFP	10953500	234199
0.619374	0.563784	MP	Herm	DLW163	2021_09_07_DLW163_20C_herm_1006_Statistics	48.26	spo-11	SYP2GFP	11113400	230282
0.649692	0.59853	MP	Herm	DLW163	2021_09_07_DLW163_20C_herm_1006_Statistics	46.06	spo-11	SYP2GFP	10224900	221991
0.602626	0.544591	MP	Herm	DLW163	2021_09_07_DLW163_20C_herm_1006_Statistics	54.44	spo-11	SYP2GFP	14490400	266172
0.633726	0.580232	MP	Herm	DLW163	2021_09_07_DLW163_20C_herm_1006_Statistics	56.58	spo-11	SYP2GFP	13145700	232338
0.680537	0.63388	MP	Herm	DLW163	2021_09_07_DLW163_20C_herm_1006_Statistics	18.59	spo-11	SYP2GFP	3344210	179893
0.711127	0.668937	LP	Herm	DLW163	2021_09_07_DLW163_20C_herm_1006_Statistics	48.92	spo-11	SYP2GFP	10684900	218416
0.697788	0.65365	MP	Herm	DLW163	2021_09_07_DLW163_20C_herm_1006_Statistics	32.62	spo-11	SYP2GFP	6075290	186244
0.619039	0.5634	MP	Herm	DLW163	2021_09_07_DLW163_20C_herm_1006_Statistics	63.09	spo-11	SYP2GFP	16164600	256215
0.66383	0.614733	MP	Herm	DLW163	2021_09_07_DLW163_20C_herm_1006_Statistics	60.19	spo-11	SYP2GFP	15288000	253996
0.650431	0.599377	MP	Herm	DLW163	2021_09_07_DLW163_20C_herm_1006_Statistics	50.4	spo-11	SYP2GFP	13189600	261698
0.685743	0.639846	MP	Herm	DLW163	2021_09_07_DLW163_20C_herm_1006_Statistics	59.61	spo-11	SYP2GFP	15118500	253624
0.716518	0.675116	LP	Herm	DLW163	2021_09_07_DLW163_20C_herm_1006_Statistics	32.78	spo-11	SYP2GFP	5801370	176979
0.730813	0.691499	LP	Herm	DLW163	2021_09_07_DLW163_20C_herm_1006_Statistics	45.7	spo-11	SYP2GFP	10027400	219418
0.775554	0.742774	LP	Herm	DLW163	2021_09_07_DLW163_20C_herm_1006_Statistics	53.67	spo-11	SYP2GFP	11909400	221901
0.737042	0.698637	LP	Herm	DLW163	2021_09_07_DLW163_20C_herm_1006_Statistics	44.35	spo-11	SYP2GFP	9399620	211942
0.803413	0.774702	LP	Herm	DLW163	2021_09_07_DLW163_20C_herm_1006_Statistics	34.94	spo-11	SYP2GFP	6262300	179230
0.75513	0.719367	LP	Herm	DLW163	2021_09_07_DLW163_20C_herm_1006_Statistics	32.14	spo-11	SYP2GFP	6283770	195512
0.780567	0.748519	LP	Herm	DLW163	2021_09_07_DLW163_20C_herm_1006_Statistics	56.31	spo-11	SYP2GFP	12255900	217651
0.817484	0.790827	LP	Herm	DLW163	2021_09_07_DLW163_20C_herm_1006_Statistics	29.24	spo-11	SYP2GFP	4930530	168623
0.874205	0.855832	LP	Herm	DLW163	2021_09_07_DLW163_20C_herm_1006_Statistics	15.28	spo-11	SYP2GFP	2445760	160063
0.849369	0.827369	LP	Herm	DLW163	2021_09_07_DLW163_20C_herm_1006_Statistics	29.15	spo-11	SYP2GFP	4768380	163581
0.760759	0.725818	LP	Herm	DLW163	2021_09_07_DLW163_20C_herm_1006_Statistics	47.2	spo-11	SYP2GFP	9675020	204979
0.730602	0.691257	LP	Herm	DLW163	2021_09_07_DLW163_20C_herm_1006_Statistics	47	spo-11	SYP2GFP	9839830	209358
0.759179	0.724007	LP	Herm	DLW163	2021_09_07_DLW163_20C_herm_1006_Statistics	27.77	spo-11	SYP2GFP	4828100	173860
0.790544	0.759953	LP	Herm	DLW163	2021_09_07_DLW163_20C_herm_1006_Statistics	60.67	spo-11	SYP2GFP	14073600	231970
0.859721	0.839233	LP	Herm	DLW163	2021_09_07_DLW163_20C_herm_1006_Statistics	34.23	spo-11	SYP2GFP	5508160	160916
0.826617	0.801294	LP	Herm	DLW163	2021_09_07_DLW163_20C_herm_1006_Statistics	42.67	spo-11	SYP2GFP	7793480	182645
0.846265	0.823812	LP	Herm	DLW163	2021_09_07_DLW163_20C_herm_1006_Statistics	44.42	spo-11	SYP2GFP	7625800	171675
0.800307	0.771142	LP	Herm	DLW163	2021_09_07_DLW163_20C_herm_1006_Statistics	51.88	spo-11	SYP2GFP	11398500	219709
0.879235	0.861597	LP	Herm	DLW163	2021_09_07_DLW163_20C_herm_1006_Statistics	42.87	spo-11	SYP2GFP	7739920	180544
0.93146	0.92145	LP	Herm	DLW163	2021_09_07_DLW163_20C_herm_1006_Statistics	41.03	spo-11	SYP2GFP	7190620	175253
0.903704	0.88964	LP	Herm	DLW163	2021_09_07_DLW163_20C_herm_1006_Statistics	38.66	spo-11	SYP2GFP	6287330	162631
0.961725	0.956135	LP	Herm	DLW163	2021_09_07_DLW163_20C_herm_1006_Statistics	43.28	spo-11	SYP2GFP	8422270	194600
0.938198	0.929172	LP	Herm	DLW163	2021_09_07_DLW163_20C_herm_1006_Statistics	37.94	spo-11	SYP2GFP	8464190	223094
0.00973053	-0.133656	TZ	Herm	DLW163	2021_09_07_DLW163_20C_herm_1007_Statistics	18.33	spo-11	SYP2GFP	2749440	149997
0.0288745	-0.11174	TZ	Herm	DLW163	2021_09_07_DLW163_20C_herm_1007_Statistics	13.71	spo-11	SYP2GFP	1858740	135575
0.0424052	-0.0962503	TZ	Herm	DLW163	2021_09_07_DLW163_20C_herm_1007_Statistics	16.26	spo-11	SYP2GFP	2513920	154608
0.00124942	-0.143365	TZ	Herm	DLW163	2021_09_07_DLW163_20C_herm_1007_Statistics	12.45	spo-11	SYP2GFP	1698010	136386
0.00458816	-0.139543	TZ	Herm	DLW163	2021_09_07_DLW163_20C_herm_1007_Statistics	19.06	spo-11	SYP2GFP	2884620	151344
0.0479255	-0.0899307	TZ	Herm	DLW163	2021_09_07_DLW163_20C_herm_1007_Statistics	17.14	spo-11	SYP2GFP	2629210	153396
0.0313889	-0.108862	TZ	Herm	DLW163	2021_09_07_DLW163_20C_herm_1007_Statistics	15.77	spo-11	SYP2GFP	2419780	153442
0.0064035	-0.137465	TZ	Herm	DLW163	2021_09_07_DLW163_20C_herm_1007_Statistics	16.88	spo-11	SYP2GFP	2615390	154940
0.0439277	-0.0945073	TZ	Herm	DLW163	2021_09_07_DLW163_20C_herm_1007_Statistics	15.29	spo-11	SYP2GFP	2368400	154899
0.0215078	-0.120174	TZ	Herm	DLW163	2021_09_07_DLW163_20C_herm_1007_Statistics	37.58	spo-11	SYP2GFP	5520840	146909
0.0888247	-0.0431095	TZ	Herm	DLW163	2021_09_07_DLW163_20C_herm_1007_Statistics	25.51	spo-11	SYP2GFP	3954160	155004
0.0715232	-0.0629161	TZ	Herm	DLW163	2021_09_07_DLW163_20C_herm_1007_Statistics	26.97	spo-11	SYP2GFP	4138460	153447
0.0873882	-0.044754	TZ	Herm	DLW163	2021_09_07_DLW163_20C_herm_1007_Statistics	19.43	spo-11	SYP2GFP	3146220	161926
0.094035	-0.0371448	TZ	Herm	DLW163	2021_09_07_DLW163_20C_herm_1007_Statistics	22.23	spo-11	SYP2GFP	3635890	163558
0.0653033	-0.0700367	TZ	Herm	DLW163	2021_09_07_DLW163_20C_herm_1007_Statistics	14.13	spo-11	SYP2GFP	2150670	152206
0.135822	0.0106933	EP	Herm	DLW163	2021_09_07_DLW163_20C_herm_1007_Statistics	23.22	spo-11	SYP2GFP	3471480	149504
0.138393	0.0136358	EP	Herm	DLW163	2021_09_07_DLW163_20C_herm_1007_Statistics	16.12	spo-11	SYP2GFP	2586530	160455
0.186929	0.0692	EP	Herm	DLW163	2021_09_07_DLW163_20C_herm_1007_Statistics	32.19	spo-11	SYP2GFP	5356660	166408
0.151224	0.0283252	EP	Herm	DLW163	2021_09_07_DLW163_20C_herm_1007_Statistics	58.6	spo-11	SYP2GFP	9574240	163383
0.128769	0.00261819	EP	Herm	DLW163	2021_09_07_DLW163_20C_herm_1007_Statistics	27.62	spo-11	SYP2GFP	4781740	173126
0.16035	0.0387722	EP	Herm	DLW163	2021_09_07_DLW163_20C_herm_1007_Statistics	34.7	spo-11	SYP2GFP	5809470	167420
0.203242	0.087875	EP	Herm	DLW163	2021_09_07_DLW163_20C_herm_1007_Statistics	33.22	spo-11	SYP2GFP	5701810	171638
0.176347	0.0570852	EP	Herm	DLW163	2021_09_07_DLW163_20C_herm_1007_Statistics	32.37	spo-11	SYP2GFP	5326880	164562
0.218399	0.105227	EP	Herm	DLW163	2021_09_07_DLW163_20C_herm_1007_Statistics	31.61	spo-11	SYP2GFP	5343010	169029
0.15559	0.0333226	EP	Herm	DLW163	2021_09_07_DLW163_20C_herm_1007_Statistics	18.12	spo-11	SYP2GFP	2975990	164238
0.21431	0.100546	EP	Herm	DLW163	2021_09_07_DLW163_20C_herm_1007_Statistics	29.08	spo-11	SYP2GFP	5521780	189882
0.233288	0.122272	EP	Herm	DLW163	2021_09_07_DLW163_20C_herm_1007_Statistics	30.91	spo-11	SYP2GFP	5553750	179675
0.152135	0.0293676	EP	Herm	DLW163	2021_09_07_DLW163_20C_herm_1007_Statistics	37.59	spo-11	SYP2GFP	5746340	152869
0.185385	0.0674319	EP	Herm	DLW163	2021_09_07_DLW163_20C_herm_1007_Statistics	28.37	spo-11	SYP2GFP	4999610	176229
0.24999	0.141392	EP	Herm	DLW163	2021_09_07_DLW163_20C_herm_1007_Statistics	32.41	spo-11	SYP2GFP	5454970	168311
0.261661	0.154753	EP	Herm	DLW163	2021_09_07_DLW163_20C_herm_1007_Statistics	32.67	spo-11	SYP2GFP	5730290	175399
0.277819	0.173251	EP	Herm	DLW163	2021_09_07_DLW163_20C_herm_1007_Statistics	33.64	spo-11	SYP2GFP	5641230	167694
0.288349	0.185305	EP	Herm	DLW163	2021_09_07_DLW163_20C_herm_1007_Statistics	34.47	spo-11	SYP2GFP	6138750	178090
0.362238	0.269893	EP	Herm	DLW163	2021_09_07_DLW163_20C_herm_1007_Statistics	36.96	spo-11	SYP2GFP	6604270	178687
0.45886	0.380505	MP	Herm	DLW163	2021_09_07_DLW163_20C_herm_1007_Statistics	36.6	spo-11	SYP2GFP	7335180	200415
0.388691	0.300176	EP	Herm	DLW163	2021_09_07_DLW163_20C_herm_1007_Statistics	33.65	spo-11	SYP2GFP	6566950	195155
0.32177	0.223566	EP	Herm	DLW163	2021_09_07_DLW163_20C_herm_1007_Statistics	40.87	spo-11	SYP2GFP	7549630	184723
0.34265	0.247468	EP	Herm	DLW163	2021_09_07_DLW163_20C_herm_1007_Statistics	41.15	spo-11	SYP2GFP	7479630	181765
0.402497	0.315981	EP	Herm	DLW163	2021_09_07_DLW163_20C_herm_1007_Statistics	40.88	spo-11	SYP2GFP	7993070	195525
0.483127	0.408286	MP	Herm	DLW163	2021_09_07_DLW163_20C_herm_1007_Statistics	40.14	spo-11	SYP2GFP	8008910	199524
0.416587	0.332111	EP	Herm	DLW163	2021_09_07_DLW163_20C_herm_1007_Statistics	41.25	spo-11	SYP2GFP	8241110	199784
0.349645	0.255476	EP	Herm	DLW163	2021_09_07_DLW163_20C_herm_1007_Statistics	40.62	spo-11	SYP2GFP	7858870	193473
0.371299	0.280266	EP	Herm	DLW163	2021_09_07_DLW163_20C_herm_1007_Statistics	34.61	spo-11	SYP2GFP	6597930	190637
0.499075	0.426544	MP	Herm	DLW163	2021_09_07_DLW163_20C_herm_1007_Statistics	43.93	spo-11	SYP2GFP	8887550	202312
0.47397	0.397803	MP	Herm	DLW163	2021_09_07_DLW163_20C_herm_1007_Statistics	38.73	spo-11	SYP2GFP	7611360	196524
0.397442	0.310195	EP	Herm	DLW163	2021_09_07_DLW163_20C_herm_1007_Statistics	37.76	spo-11	SYP2GFP	7544520	199802
0.35599	0.262741	EP	Herm	DLW163	2021_09_07_DLW163_20C_herm_1007_Statistics	35.07	spo-11	SYP2GFP	6760990	192786
0.448944	0.369154	MP	Herm	DLW163	2021_09_07_DLW163_20C_herm_1007_Statistics	40.03	spo-11	SYP2GFP	7760130	193858
0.372564	0.281714	EP	Herm	DLW163	2021_09_07_DLW163_20C_herm_1007_Statistics	44.73	spo-11	SYP2GFP	9033880	201965
0.465602	0.388224	MP	Herm	DLW163	2021_09_07_DLW163_20C_herm_1007_Statistics	44.16	spo-11	SYP2GFP	8949010	202650
0.594533	0.535823	MP	Herm	DLW163	2021_09_07_DLW163_20C_herm_1007_Statistics	51.39	spo-11	SYP2GFP	13131300	255522
0.643642	0.592043	MP	Herm	DLW163	2021_09_07_DLW163_20C_herm_1007_Statistics	55.74	spo-11	SYP2GFP	13254900	237799
0.574083	0.512412	MP	Herm	DLW163	2021_09_07_DLW163_20C_herm_1007_Statistics	50.87	spo-11	SYP2GFP	12134600	238541
0.636694	0.584089	MP	Herm	DLW163	2021_09_07_DLW163_20C_herm_1007_Statistics	55.86	spo-11	SYP2GFP	14369800	257247
0.690956	0.646207	MP	Herm	DLW163	2021_09_07_DLW163_20C_herm_1007_Statistics	44.48	spo-11	SYP2GFP	8980520	201900
0.604157	0.546841	MP	Herm	DLW163	2021_09_07_DLW163_20C_herm_1007_Statistics	32.76	spo-11	SYP2GFP	7230000	220696
0.577345	0.516146	MP	Herm	DLW163	2021_09_07_DLW163_20C_herm_1007_Statistics	46.63	spo-11	SYP2GFP	10926900	234332
0.558195	0.494224	MP	Herm	DLW163	2021_09_07_DLW163_20C_herm_1007_Statistics	32.29	spo-11	SYP2GFP	7563890	234249
0.665838	0.617453	MP	Herm	DLW163	2021_09_07_DLW163_20C_herm_1007_Statistics	51.86	spo-11	SYP2GFP	11621000	224084
0.684985	0.639372	MP	Herm	DLW163	2021_09_07_DLW163_20C_herm_1007_Statistics	51.91	spo-11	SYP2GFP	12533800	241453
0.625663	0.571461	MP	Herm	DLW163	2021_09_07_DLW163_20C_herm_1007_Statistics	50.05	spo-11	SYP2GFP	13116900	262076
0.662218	0.613309	MP	Herm	DLW163	2021_09_07_DLW163_20C_herm_1007_Statistics	61.04	spo-11	SYP2GFP	15851200	259685
0.716004	0.674882	LP	Herm	DLW163	2021_09_07_DLW163_20C_herm_1007_Statistics	20.97	spo-11	SYP2GFP	3834380	182851
0.602837	0.545329	MP	Herm	DLW163	2021_09_07_DLW163_20C_herm_1007_Statistics	46.19	spo-11	SYP2GFP	11099500	240301
0.675341	0.628332	MP	Herm	DLW163	2021_09_07_DLW163_20C_herm_1007_Statistics	49.08	spo-11	SYP2GFP	10482000	213570
0.722552	0.682379	LP	Herm	DLW163	2021_09_07_DLW163_20C_herm_1007_Statistics	43.71	spo-11	SYP2GFP	9122230	208699
0.654412	0.604372	MP	Herm	DLW163	2021_09_07_DLW163_20C_herm_1007_Statistics	59.68	spo-11	SYP2GFP	15742200	263777
0.698069	0.65435	MP	Herm	DLW163	2021_09_07_DLW163_20C_herm_1007_Statistics	42.43	spo-11	SYP2GFP	9661660	227708
0.671673	0.624132	MP	Herm	DLW163	2021_09_07_DLW163_20C_herm_1007_Statistics	54.33	spo-11	SYP2GFP	12645200	232748
0.687443	0.642186	MP	Herm	DLW163	2021_09_07_DLW163_20C_herm_1007_Statistics	63.55	spo-11	SYP2GFP	16318400	256780
0.710538	0.668625	LP	Herm	DLW163	2021_09_07_DLW163_20C_herm_1007_Statistics	48.17	spo-11	SYP2GFP	11594900	240708
0.642898	0.591191	MP	Herm	DLW163	2021_09_07_DLW163_20C_herm_1007_Statistics	64.4	spo-11	SYP2GFP	15656000	243106
0.700757	0.657428	MP	Herm	DLW163	2021_09_07_DLW163_20C_herm_1007_Statistics	70.93	spo-11	SYP2GFP	18951100	267180
0.716653	0.675626	LP	Herm	DLW163	2021_09_07_DLW163_20C_herm_1007_Statistics	65.64	spo-11	SYP2GFP	17068200	260027
0.520126	0.450642	MP	Herm	DLW163	2021_09_07_DLW163_20C_herm_1007_Statistics	49.59	spo-11	SYP2GFP	10516200	212063
0.522594	0.453468	MP	Herm	DLW163	2021_09_07_DLW163_20C_herm_1007_Statistics	46.71	spo-11	SYP2GFP	10551400	225892
0.514875	0.444631	MP	Herm	DLW163	2021_09_07_DLW163_20C_herm_1007_Statistics	46.7	spo-11	SYP2GFP	10337500	221360
0.534581	0.46719	MP	Herm	DLW163	2021_09_07_DLW163_20C_herm_1007_Statistics	44.69	spo-11	SYP2GFP	10652700	238369
0.557128	0.493002	MP	Herm	DLW163	2021_09_07_DLW163_20C_herm_1007_Statistics	47.33	spo-11	SYP2GFP	12596600	266144
0.543351	0.47723	MP	Herm	DLW163	2021_09_07_DLW163_20C_herm_1007_Statistics	50.62	spo-11	SYP2GFP	11402700	225261
0.725909	0.686222	LP	Herm	DLW163	2021_09_07_DLW163_20C_herm_1007_Statistics	47.98	spo-11	SYP2GFP	9864100	205588
0.758005	0.722966	LP	Herm	DLW163	2021_09_07_DLW163_20C_herm_1007_Statistics	45.25	spo-11	SYP2GFP	8939270	197553
0.809022	0.781369	LP	Herm	DLW163	2021_09_07_DLW163_20C_herm_1007_Statistics	45.64	spo-11	SYP2GFP	8241550	180577
0.786934	0.756083	LP	Herm	DLW163	2021_09_07_DLW163_20C_herm_1007_Statistics	46.49	spo-11	SYP2GFP	8886280	191144
0.733023	0.694366	LP	Herm	DLW163	2021_09_07_DLW163_20C_herm_1007_Statistics	48.5	spo-11	SYP2GFP	10522200	216953
0.742884	0.705655	LP	Herm	DLW163	2021_09_07_DLW163_20C_herm_1007_Statistics	52.23	spo-11	SYP2GFP	11489900	219987
0.775812	0.743351	LP	Herm	DLW163	2021_09_07_DLW163_20C_herm_1007_Statistics	53.83	spo-11	SYP2GFP	10555000	196080
0.760396	0.725702	LP	Herm	DLW163	2021_09_07_DLW163_20C_herm_1007_Statistics	27.66	spo-11	SYP2GFP	4911280	177559
0.797816	0.76854	LP	Herm	DLW163	2021_09_07_DLW163_20C_herm_1007_Statistics	32.97	spo-11	SYP2GFP	5703630	172995
0.779262	0.7473	LP	Herm	DLW163	2021_09_07_DLW163_20C_herm_1007_Statistics	60.3	spo-11	SYP2GFP	12688100	210416
0.834614	0.810667	LP	Herm	DLW163	2021_09_07_DLW163_20C_herm_1007_Statistics	28.98	spo-11	SYP2GFP	4730480	163233
0.807577	0.779715	LP	Herm	DLW163	2021_09_07_DLW163_20C_herm_1007_Statistics	53.77	spo-11	SYP2GFP	9959090	185216
0.750823	0.714743	LP	Herm	DLW163	2021_09_07_DLW163_20C_herm_1007_Statistics	54.69	spo-11	SYP2GFP	12466700	227952
0.823571	0.798024	LP	Herm	DLW163	2021_09_07_DLW163_20C_herm_1007_Statistics	35.35	spo-11	SYP2GFP	5957790	168537
0.852661	0.831327	LP	Herm	DLW163	2021_09_07_DLW163_20C_herm_1007_Statistics	29.1	spo-11	SYP2GFP	4767440	163830
0.833531	0.809428	LP	Herm	DLW163	2021_09_07_DLW163_20C_herm_1007_Statistics	46.66	spo-11	SYP2GFP	8388930	179788
0.851675	0.830199	LP	Herm	DLW163	2021_09_07_DLW163_20C_herm_1007_Statistics	47.83	spo-11	SYP2GFP	8887950	185824
0.873604	0.855303	LP	Herm	DLW163	2021_09_07_DLW163_20C_herm_1007_Statistics	25.71	spo-11	SYP2GFP	4259310	165667
0.860304	0.840077	LP	Herm	DLW163	2021_09_07_DLW163_20C_herm_1007_Statistics	46.76	spo-11	SYP2GFP	8709180	186253
0.806703	0.778714	LP	Herm	DLW163	2021_09_07_DLW163_20C_herm_1007_Statistics	64.96	spo-11	SYP2GFP	14138700	217652
0.905579	0.891907	LP	Herm	DLW163	2021_09_07_DLW163_20C_herm_1007_Statistics	27.13	spo-11	SYP2GFP	4123700	151998
0.839842	0.816652	LP	Herm	DLW163	2021_09_07_DLW163_20C_herm_1007_Statistics	67.62	spo-11	SYP2GFP	13437000	198713
0.871738	0.853166	LP	Herm	DLW163	2021_09_07_DLW163_20C_herm_1007_Statistics	44.29	spo-11	SYP2GFP	6805560	153659
0.926443	0.915792	LP	Herm	DLW163	2021_09_07_DLW163_20C_herm_1007_Statistics	34.38	spo-11	SYP2GFP	5246330	152598
0.882374	0.865342	LP	Herm	DLW163	2021_09_07_DLW163_20C_herm_1007_Statistics	32.4	spo-11	SYP2GFP	5011720	154683
0.912012	0.899272	LP	Herm	DLW163	2021_09_07_DLW163_20C_herm_1007_Statistics	32.55	spo-11	SYP2GFP	5369910	164974
0.955869	0.949479	LP	Herm	DLW163	2021_09_07_DLW163_20C_herm_1007_Statistics	33.38	spo-11	SYP2GFP	5006680	149990
0.899323	0.884745	LP	Herm	DLW163	2021_09_07_DLW163_20C_herm_1007_Statistics	30.39	spo-11	SYP2GFP	4552810	149813
0.964735	0.959629	LP	Herm	DLW163	2021_09_07_DLW163_20C_herm_1007_Statistics	37.87	spo-11	SYP2GFP	5672490	149788
0.989548	0.988034	LP	Herm	DLW163	2021_09_07_DLW163_20C_herm_1007_Statistics	34.8	spo-11	SYP2GFP	5601280	160956
0.943763	0.935621	LP	Herm	DLW163	2021_09_07_DLW163_20C_herm_1007_Statistics	36.51	spo-11	SYP2GFP	5966530	163422
0.99617	0.995615	LP	Herm	DLW163	2021_09_07_DLW163_20C_herm_1007_Statistics	39.1	spo-11	SYP2GFP	6251490	159885
0.976468	0.97306	LP	Herm	DLW163	2021_09_07_DLW163_20C_herm_1007_Statistics	40.45	spo-11	SYP2GFP	7342860	181529
0.0444163	-0.0557138	TZ	Male	DLW118	2021_10_22_DLW118_20C_male_01_Statistics	17.16	WT	SYP2GFP	1706330	99436.5
0.00285689	-0.101628	TZ	Male	DLW118	2021_10_22_DLW118_20C_male_01_Statistics	18.16	WT	SYP2GFP	1841420	101400
0.0752233	-0.0216787	TZ	Male	DLW118	2021_10_22_DLW118_20C_male_01_Statistics	19.55	WT	SYP2GFP	2137200	109320
0.0658046	-0.0320844	TZ	Male	DLW118	2021_10_22_DLW118_20C_male_01_Statistics	16.65	WT	SYP2GFP	1728300	103802
0.0948459	0	EP	Male	DLW118	2021_10_22_DLW118_20C_male_01_Statistics	18.11	WT	SYP2GFP	1699990	93870.2
0.117595	0.025133	EP	Male	DLW118	2021_10_22_DLW118_20C_male_01_Statistics	14.58	WT	SYP2GFP	1420150	97404
0.0976438	0.00309112	EP	Male	DLW118	2021_10_22_DLW118_20C_male_01_Statistics	27.13	WT	SYP2GFP	3084110	113679
0.116426	0.0238411	EP	Male	DLW118	2021_10_22_DLW118_20C_male_01_Statistics	21.72	WT	SYP2GFP	2221160	102263
0.137668	0.0473095	EP	Male	DLW118	2021_10_22_DLW118_20C_male_01_Statistics	24.26	WT	SYP2GFP	2689450	110859
0.172115	0.0853659	EP	Male	DLW118	2021_10_22_DLW118_20C_male_01_Statistics	19.71	WT	SYP2GFP	2058450	104437
0.152543	0.0637427	EP	Male	DLW118	2021_10_22_DLW118_20C_male_01_Statistics	20.73	WT	SYP2GFP	2212770	106742
0.190221	0.105368	EP	Male	DLW118	2021_10_22_DLW118_20C_male_01_Statistics	24.19	WT	SYP2GFP	2753370	113823
0.239366	0.159664	EP	Male	DLW118	2021_10_22_DLW118_20C_male_01_Statistics	22.58	WT	SYP2GFP	2805930	124266
0.22116	0.13955	EP	Male	DLW118	2021_10_22_DLW118_20C_male_01_Statistics	25.88	WT	SYP2GFP	2999910	115916
0.26285	0.185608	EP	Male	DLW118	2021_10_22_DLW118_20C_male_01_Statistics	27.42	WT	SYP2GFP	3217320	117335
0.247952	0.169149	EP	Male	DLW118	2021_10_22_DLW118_20C_male_01_Statistics	32.4	WT	SYP2GFP	3720860	114841
0.290323	0.21596	EP	Male	DLW118	2021_10_22_DLW118_20C_male_01_Statistics	24.83	WT	SYP2GFP	2565470	103321
0.295479	0.221656	EP	Male	DLW118	2021_10_22_DLW118_20C_male_01_Statistics	28.44	WT	SYP2GFP	3446930	121200
0.333676	0.263856	EP	Male	DLW118	2021_10_22_DLW118_20C_male_01_Statistics	26.66	WT	SYP2GFP	2936280	110138
0.339165	0.26992	EP	Male	DLW118	2021_10_22_DLW118_20C_male_01_Statistics	38.22	WT	SYP2GFP	4654320	121777
0.297195	0.223552	EP	Male	DLW118	2021_10_22_DLW118_20C_male_01_Statistics	29.36	WT	SYP2GFP	3363830	114572
0.368187	0.301983	EP	Male	DLW118	2021_10_22_DLW118_20C_male_01_Statistics	37.39	WT	SYP2GFP	4481400	119856
0.328998	0.258687	EP	Male	DLW118	2021_10_22_DLW118_20C_male_01_Statistics	35.52	WT	SYP2GFP	3939680	110914
0.36689	0.30055	EP	Male	DLW118	2021_10_22_DLW118_20C_male_01_Statistics	36.6	WT	SYP2GFP	4199250	114734
0.388209	0.324103	EP	Male	DLW118	2021_10_22_DLW118_20C_male_01_Statistics	41.72	WT	SYP2GFP	5194690	124513
0.286847	0.21212	EP	Male	DLW118	2021_10_22_DLW118_20C_male_01_Statistics	19.14	WT	SYP2GFP	1850640	96689.7
0.418037	0.357057	MP	Male	DLW118	2021_10_22_DLW118_20C_male_01_Statistics	37.25	WT	SYP2GFP	4613290	123847
0.463637	0.407434	MP	Male	DLW118	2021_10_22_DLW118_20C_male_01_Statistics	46.55	WT	SYP2GFP	5562740	119500
0.440994	0.382419	MP	Male	DLW118	2021_10_22_DLW118_20C_male_01_Statistics	43.46	WT	SYP2GFP	5897360	135696
0.522762	0.472755	MP	Male	DLW118	2021_10_22_DLW118_20C_male_01_Statistics	47.09	WT	SYP2GFP	6094920	129431
0.410362	0.348577	MP	Male	DLW118	2021_10_22_DLW118_20C_male_01_Statistics	39.52	WT	SYP2GFP	4781560	120991
0.485958	0.432094	MP	Male	DLW118	2021_10_22_DLW118_20C_male_01_Statistics	39.8	WT	SYP2GFP	4990250	125383
0.507407	0.455791	MP	Male	DLW118	2021_10_22_DLW118_20C_male_01_Statistics	48.61	WT	SYP2GFP	6945460	142881
0.544421	0.496684	MP	Male	DLW118	2021_10_22_DLW118_20C_male_01_Statistics	53.22	WT	SYP2GFP	7722300	145101
0.590122	0.547173	MP	Male	DLW118	2021_10_22_DLW118_20C_male_01_Statistics	54.34	WT	SYP2GFP	7561980	139160
0.645105	0.607917	MP	Male	DLW118	2021_10_22_DLW118_20C_male_01_Statistics	55.98	WT	SYP2GFP	7770810	138814
0.695215	0.663279	MP	Male	DLW118	2021_10_22_DLW118_20C_male_01_Statistics	56.21	WT	SYP2GFP	8617510	153309
0.619024	0.579104	MP	Male	DLW118	2021_10_22_DLW118_20C_male_01_Statistics	56.7	WT	SYP2GFP	7956050	140318
0.568639	0.523439	MP	Male	DLW118	2021_10_22_DLW118_20C_male_01_Statistics	50	WT	SYP2GFP	6560270	131205
0.668383	0.633635	MP	Male	DLW118	2021_10_22_DLW118_20C_male_01_Statistics	60.59	WT	SYP2GFP	9053180	149417
0.844537	0.828247	LP	Male	DLW118	2021_10_22_DLW118_20C_male_01_Statistics	58.55	WT	SYP2GFP	8283580	141479
0.897246	0.886479	LP	Male	DLW118	2021_10_22_DLW118_20C_male_01_Statistics	53.38	WT	SYP2GFP	7233620	135512
0.748529	0.722179	LP	Male	DLW118	2021_10_22_DLW118_20C_male_01_Statistics	61.52	WT	SYP2GFP	8917990	144961
0.793104	0.771424	LP	Male	DLW118	2021_10_22_DLW118_20C_male_01_Statistics	56.89	WT	SYP2GFP	7731880	135909
0.835883	0.818686	LP	Male	DLW118	2021_10_22_DLW118_20C_male_01_Statistics	63.76	WT	SYP2GFP	8334090	130710
0.742393	0.7154	LP	Male	DLW118	2021_10_22_DLW118_20C_male_01_Statistics	61.8	WT	SYP2GFP	9473600	153294
0.904238	0.894203	LP	Male	DLW118	2021_10_22_DLW118_20C_male_01_Statistics	64.71	WT	SYP2GFP	8367240	129304
0.991666	0.990793	LP	Male	DLW118	2021_10_22_DLW118_20C_male_01_Statistics	50.31	WT	SYP2GFP	5726840	113831
0.982705	0.980893	LP	Male	DLW118	2021_10_22_DLW118_20C_male_01_Statistics	53.8	WT	SYP2GFP	6936980	128940
0.0941245	-0.0155026	TZ	Male	DLW118	2021_10_22_DLW118_20C_male_01001_Statistics	23.76	WT	SYP2GFP	1982500	83438.6
0.090059	-0.02006	TZ	Male	DLW118	2021_10_22_DLW118_20C_male_01001_Statistics	17.13	WT	SYP2GFP	1708720	99750.1
0.0828104	-0.0281858	TZ	Male	DLW118	2021_10_22_DLW118_20C_male_01001_Statistics	19.77	WT	SYP2GFP	1840530	93097.1
0.0336102	-0.0833401	TZ	Male	DLW118	2021_10_22_DLW118_20C_male_01001_Statistics	12.13	WT	SYP2GFP	975749	80441
0.0530853	-0.0615082	TZ	Male	DLW118	2021_10_22_DLW118_20C_male_01001_Statistics	24.65	WT	SYP2GFP	2201160	89296.6
0.0518478	-0.0628954	TZ	Male	DLW118	2021_10_22_DLW118_20C_male_01001_Statistics	16.99	WT	SYP2GFP	1545070	90940
0.00945407	-0.11042	TZ	Male	DLW118	2021_10_22_DLW118_20C_male_01001_Statistics	13.69	WT	SYP2GFP	1127200	82337.5
0.0207574	-0.0977483	TZ	Male	DLW118	2021_10_22_DLW118_20C_male_01001_Statistics	19.48	WT	SYP2GFP	1651860	84797.7
0.0114895	-0.108138	TZ	Male	DLW118	2021_10_22_DLW118_20C_male_01001_Statistics	14.17	WT	SYP2GFP	1231660	86920.3
0.205057	0.108855	EP	Male	DLW118	2021_10_22_DLW118_20C_male_01001_Statistics	23.71	WT	SYP2GFP	2543580	107279
0.185028	0.0864019	EP	Male	DLW118	2021_10_22_DLW118_20C_male_01001_Statistics	22.94	WT	SYP2GFP	2343950	102177
0.168534	0.0679123	EP	Male	DLW118	2021_10_22_DLW118_20C_male_01001_Statistics	22.13	WT	SYP2GFP	2038340	92107.5
0.188142	0.0898923	EP	Male	DLW118	2021_10_22_DLW118_20C_male_01001_Statistics	20.89	WT	SYP2GFP	1857650	88925.3
0.148654	0.0456262	EP	Male	DLW118	2021_10_22_DLW118_20C_male_01001_Statistics	20.37	WT	SYP2GFP	1732340	85043.7
0.146958	0.043725	EP	Male	DLW118	2021_10_22_DLW118_20C_male_01001_Statistics	22.32	WT	SYP2GFP	2173090	97360.7
0.129513	0.0241691	EP	Male	DLW118	2021_10_22_DLW118_20C_male_01001_Statistics	22.39	WT	SYP2GFP	2139400	95551.6
0.108386	0.000484363	EP	Male	DLW118	2021_10_22_DLW118_20C_male_01001_Statistics	18.58	WT	SYP2GFP	1647980	88696.4
0.300761	0.216141	EP	Male	DLW118	2021_10_22_DLW118_20C_male_01001_Statistics	30.37	WT	SYP2GFP	2914220	95957.2
0.284357	0.197752	EP	Male	DLW118	2021_10_22_DLW118_20C_male_01001_Statistics	27.02	WT	SYP2GFP	2780800	102916
0.297002	0.211926	EP	Male	DLW118	2021_10_22_DLW118_20C_male_01001_Statistics	25.17	WT	SYP2GFP	2435690	96769.6
0.246223	0.155003	EP	Male	DLW118	2021_10_22_DLW118_20C_male_01001_Statistics	27.45	WT	SYP2GFP	2897210	105545
0.262329	0.173057	EP	Male	DLW118	2021_10_22_DLW118_20C_male_01001_Statistics	22.66	WT	SYP2GFP	2140310	94453.2
0.258524	0.168792	EP	Male	DLW118	2021_10_22_DLW118_20C_male_01001_Statistics	28.12	WT	SYP2GFP	2755450	97989
0.222305	0.12819	EP	Male	DLW118	2021_10_22_DLW118_20C_male_01001_Statistics	24.28	WT	SYP2GFP	2243240	92390.4
0.223174	0.129165	EP	Male	DLW118	2021_10_22_DLW118_20C_male_01001_Statistics	24.94	WT	SYP2GFP	2585300	103661
0.493854	0.432601	MP	Male	DLW118	2021_10_22_DLW118_20C_male_01001_Statistics	49.67	WT	SYP2GFP	5640840	113566
0.441494	0.373905	MP	Male	DLW118	2021_10_22_DLW118_20C_male_01001_Statistics	36.45	WT	SYP2GFP	4184010	114788
0.506731	0.447037	MP	Male	DLW118	2021_10_22_DLW118_20C_male_01001_Statistics	47.3	WT	SYP2GFP	5634490	119122
0.480124	0.41721	MP	Male	DLW118	2021_10_22_DLW118_20C_male_01001_Statistics	41.96	WT	SYP2GFP	4292130	102291
0.463541	0.39862	MP	Male	DLW118	2021_10_22_DLW118_20C_male_01001_Statistics	42.84	WT	SYP2GFP	4932960	115148
0.41896	0.348644	MP	Male	DLW118	2021_10_22_DLW118_20C_male_01001_Statistics	45.03	WT	SYP2GFP	5022770	111543
0.394594	0.321329	EP	Male	DLW118	2021_10_22_DLW118_20C_male_01001_Statistics	40.2	WT	SYP2GFP	4406030	109603
0.343562	0.264121	EP	Male	DLW118	2021_10_22_DLW118_20C_male_01001_Statistics	36.79	WT	SYP2GFP	3710510	100856
0.440409	0.372689	MP	Male	DLW118	2021_10_22_DLW118_20C_male_01001_Statistics	40.65	WT	SYP2GFP	4053420	99715.1
0.348914	0.270121	EP	Male	DLW118	2021_10_22_DLW118_20C_male_01001_Statistics	28.57	WT	SYP2GFP	2832800	99153
0.32635	0.244826	EP	Male	DLW118	2021_10_22_DLW118_20C_male_01001_Statistics	26.93	WT	SYP2GFP	2805210	104167
0.364482	0.287573	EP	Male	DLW118	2021_10_22_DLW118_20C_male_01001_Statistics	30.75	WT	SYP2GFP	3019380	98191.2
0.391541	0.317906	EP	Male	DLW118	2021_10_22_DLW118_20C_male_01001_Statistics	41.2	WT	SYP2GFP	4047500	98240.3
0.588799	0.539036	MP	Male	DLW118	2021_10_22_DLW118_20C_male_01001_Statistics	56.71	WT	SYP2GFP	7042860	124191
0.608768	0.561422	MP	Male	DLW118	2021_10_22_DLW118_20C_male_01001_Statistics	53.38	WT	SYP2GFP	6785730	127121
0.561083	0.507967	MP	Male	DLW118	2021_10_22_DLW118_20C_male_01001_Statistics	53.3	WT	SYP2GFP	6589250	123626
0.625042	0.579666	MP	Male	DLW118	2021_10_22_DLW118_20C_male_01001_Statistics	51.38	WT	SYP2GFP	5774460	112387
0.536358	0.480249	MP	Male	DLW118	2021_10_22_DLW118_20C_male_01001_Statistics	53.25	WT	SYP2GFP	6130300	115123
0.576473	0.525219	MP	Male	DLW118	2021_10_22_DLW118_20C_male_01001_Statistics	47	WT	SYP2GFP	5144270	109453
0.531939	0.475295	MP	Male	DLW118	2021_10_22_DLW118_20C_male_01001_Statistics	45.97	WT	SYP2GFP	5147810	111982
0.643956	0.600868	MP	Male	DLW118	2021_10_22_DLW118_20C_male_01001_Statistics	57.86	WT	SYP2GFP	7675500	132656
0.6897	0.652148	MP	Male	DLW118	2021_10_22_DLW118_20C_male_01001_Statistics	59.91	WT	SYP2GFP	8455180	141131
0.740599	0.709206	LP	Male	DLW118	2021_10_22_DLW118_20C_male_01001_Statistics	64.99	WT	SYP2GFP	9506730	146280
0.705897	0.670305	LP	Male	DLW118	2021_10_22_DLW118_20C_male_01001_Statistics	60.48	WT	SYP2GFP	9331950	154298
0.724852	0.691554	LP	Male	DLW118	2021_10_22_DLW118_20C_male_01001_Statistics	55.99	WT	SYP2GFP	6962560	124354
0.657378	0.615915	MP	Male	DLW118	2021_10_22_DLW118_20C_male_01001_Statistics	49.34	WT	SYP2GFP	7262600	147195
0.683022	0.644662	MP	Male	DLW118	2021_10_22_DLW118_20C_male_01001_Statistics	54.07	WT	SYP2GFP	7203990	133235
0.76292	0.734229	LP	Male	DLW118	2021_10_22_DLW118_20C_male_01001_Statistics	63.73	WT	SYP2GFP	10120600	158804
0.802438	0.778529	LP	Male	DLW118	2021_10_22_DLW118_20C_male_01001_Statistics	61.06	WT	SYP2GFP	9659590	158198
0.846488	0.827911	LP	Male	DLW118	2021_10_22_DLW118_20C_male_01001_Statistics	58.14	WT	SYP2GFP	8995470	154721
0.777447	0.750515	LP	Male	DLW118	2021_10_22_DLW118_20C_male_01001_Statistics	66.87	WT	SYP2GFP	11527800	172391
0.81819	0.796187	LP	Male	DLW118	2021_10_22_DLW118_20C_male_01001_Statistics	62.21	WT	SYP2GFP	9673580	155499
0.781186	0.754705	LP	Male	DLW118	2021_10_22_DLW118_20C_male_01001_Statistics	60.4	WT	SYP2GFP	7463020	123560
0.985214	0.983424	LP	Male	DLW118	2021_10_22_DLW118_20C_male_01001_Statistics	65.82	WT	SYP2GFP	9673180	146964
0.937334	0.929751	LP	Male	DLW118	2021_10_22_DLW118_20C_male_01001_Statistics	61.18	WT	SYP2GFP	8959560	146446
0.886555	0.872827	LP	Male	DLW118	2021_10_22_DLW118_20C_male_01001_Statistics	61.78	WT	SYP2GFP	9099010	147281
0.856464	0.839094	LP	Male	DLW118	2021_10_22_DLW118_20C_male_01001_Statistics	62.24	WT	SYP2GFP	9543660	153336
0.927002	0.918168	LP	Male	DLW118	2021_10_22_DLW118_20C_male_01001_Statistics	62.48	WT	SYP2GFP	8047230	128797
0.979513	0.977034	LP	Male	DLW118	2021_10_22_DLW118_20C_male_01001_Statistics	63.09	WT	SYP2GFP	9044940	143366
0.933298	0.925226	LP	Male	DLW118	2021_10_22_DLW118_20C_male_01001_Statistics	59.59	WT	SYP2GFP	6888300	115595
0.86143	0.84466	LP	Male	DLW118	2021_10_22_DLW118_20C_male_01001_Statistics	58.02	WT	SYP2GFP	7855040	135385
0.197506	-0.0361752	TZ	Male	DLW118	2021_10_22_DLW118_20C_male_01002_Statistics	22.33	WT	SYP2GFP	2100770	94078.4
0.221619	-0.00504033	TZ	Male	DLW118	2021_10_22_DLW118_20C_male_01002_Statistics	27.76	WT	SYP2GFP	2790430	100520
0.166165	-0.0766428	TZ	Male	DLW118	2021_10_22_DLW118_20C_male_01002_Statistics	22.79	WT	SYP2GFP	2117250	92902.6
0.185671	-0.0514571	TZ	Male	DLW118	2021_10_22_DLW118_20C_male_01002_Statistics	24.94	WT	SYP2GFP	2409320	96604.7
0.19007	-0.0457763	TZ	Male	DLW118	2021_10_22_DLW118_20C_male_01002_Statistics	25.13	WT	SYP2GFP	2501160	99528.8
0.153337	-0.0932063	TZ	Male	DLW118	2021_10_22_DLW118_20C_male_01002_Statistics	24.3	WT	SYP2GFP	2421690	99658
0.133613	-0.118674	TZ	Male	DLW118	2021_10_22_DLW118_20C_male_01002_Statistics	12.93	WT	SYP2GFP	1077110	83303.2
0.120426	-0.135701	TZ	Male	DLW118	2021_10_22_DLW118_20C_male_01002_Statistics	17.1	WT	SYP2GFP	1634630	95592.4
0.0927061	-0.171492	TZ	Male	DLW118	2021_10_22_DLW118_20C_male_01002_Statistics	19.89	WT	SYP2GFP	1718510	86400.7
0.115218	-0.142425	TZ	Male	DLW118	2021_10_22_DLW118_20C_male_01002_Statistics	22.75	WT	SYP2GFP	2079400	91402.2
0.0792945	-0.188809	TZ	Male	DLW118	2021_10_22_DLW118_20C_male_01002_Statistics	19.45	WT	SYP2GFP	1781160	91576.3
0.0198175	-0.265606	TZ	Male	DLW118	2021_10_22_DLW118_20C_male_01002_Statistics	19.69	WT	SYP2GFP	1734170	88073.6
0.425583	0.258316	EP	Male	DLW118	2021_10_22_DLW118_20C_male_01002_Statistics	38.9	WT	SYP2GFP	4203600	108062
0.410318	0.238607	EP	Male	DLW118	2021_10_22_DLW118_20C_male_01002_Statistics	41.53	WT	SYP2GFP	4840940	116565
0.363391	0.178014	EP	Male	DLW118	2021_10_22_DLW118_20C_male_01002_Statistics	35.92	WT	SYP2GFP	3809170	106046
0.382901	0.203205	EP	Male	DLW118	2021_10_22_DLW118_20C_male_01002_Statistics	30.34	WT	SYP2GFP	2884030	95057
0.394839	0.21862	EP	Male	DLW118	2021_10_22_DLW118_20C_male_01002_Statistics	44.48	WT	SYP2GFP	4961970	111555
0.315884	0.116673	EP	Male	DLW118	2021_10_22_DLW118_20C_male_01002_Statistics	29.96	WT	SYP2GFP	2959230	98772.7
0.334402	0.140584	EP	Male	DLW118	2021_10_22_DLW118_20C_male_01002_Statistics	39.71	WT	SYP2GFP	4072390	102553
0.338393	0.145737	EP	Male	DLW118	2021_10_22_DLW118_20C_male_01002_Statistics	23.01	WT	SYP2GFP	2107800	91603.7
0.253019	0.0355032	EP	Male	DLW118	2021_10_22_DLW118_20C_male_01002_Statistics	24.46	WT	SYP2GFP	2619010	107073
0.267038	0.0536038	EP	Male	DLW118	2021_10_22_DLW118_20C_male_01002_Statistics	28.73	WT	SYP2GFP	2961000	103063
0.284209	0.0757751	EP	Male	DLW118	2021_10_22_DLW118_20C_male_01002_Statistics	30.64	WT	SYP2GFP	3098700	101133
0.294716	0.0893419	EP	Male	DLW118	2021_10_22_DLW118_20C_male_01002_Statistics	28.51	WT	SYP2GFP	2617090	91795.5
0.225533	1.26713e-05	EP	Male	DLW118	2021_10_22_DLW118_20C_male_01002_Statistics	28.44	WT	SYP2GFP	2926900	102915
0.43729	0.273432	EP	Male	DLW118	2021_10_22_DLW118_20C_male_01002_Statistics	46.16	WT	SYP2GFP	5512390	119419
0.562414	0.434991	MP	Male	DLW118	2021_10_22_DLW118_20C_male_01002_Statistics	46.58	WT	SYP2GFP	6116360	131309
0.548942	0.417596	MP	Male	DLW118	2021_10_22_DLW118_20C_male_01002_Statistics	48.98	WT	SYP2GFP	6548740	133702
0.580841	0.458784	MP	Male	DLW118	2021_10_22_DLW118_20C_male_01002_Statistics	44.2	WT	SYP2GFP	5020010	113575
0.605282	0.490343	MP	Male	DLW118	2021_10_22_DLW118_20C_male_01002_Statistics	51.58	WT	SYP2GFP	7124580	138127
0.494163	0.346866	MP	Male	DLW118	2021_10_22_DLW118_20C_male_01002_Statistics	44.29	WT	SYP2GFP	4813540	108682
0.488482	0.339531	MP	Male	DLW118	2021_10_22_DLW118_20C_male_01002_Statistics	51.71	WT	SYP2GFP	6431720	124381
0.521266	0.381862	MP	Male	DLW118	2021_10_22_DLW118_20C_male_01002_Statistics	46.42	WT	SYP2GFP	5959340	128379
0.541669	0.408206	MP	Male	DLW118	2021_10_22_DLW118_20C_male_01002_Statistics	39.41	WT	SYP2GFP	4330940	109894
0.468266	0.313428	EP	Male	DLW118	2021_10_22_DLW118_20C_male_01002_Statistics	44.87	WT	SYP2GFP	5537460	123411
0.828601	0.778691	LP	Male	DLW118	2021_10_22_DLW118_20C_male_01002_Statistics	53.59	WT	SYP2GFP	8213940	153274
0.868151	0.829757	LP	Male	DLW118	2021_10_22_DLW118_20C_male_01002_Statistics	52.42	WT	SYP2GFP	6363190	121389
0.80641	0.750037	LP	Male	DLW118	2021_10_22_DLW118_20C_male_01002_Statistics	59.67	WT	SYP2GFP	9978080	167221
0.865564	0.826418	LP	Male	DLW118	2021_10_22_DLW118_20C_male_01002_Statistics	52.92	WT	SYP2GFP	8315160	157127
0.846347	0.801604	LP	Male	DLW118	2021_10_22_DLW118_20C_male_01002_Statistics	56.17	WT	SYP2GFP	8344670	148561
0.804346	0.747373	LP	Male	DLW118	2021_10_22_DLW118_20C_male_01002_Statistics	49.89	WT	SYP2GFP	6368510	127651
0.78934	0.727996	LP	Male	DLW118	2021_10_22_DLW118_20C_male_01002_Statistics	51.39	WT	SYP2GFP	7267200	141413
0.839739	0.793071	LP	Male	DLW118	2021_10_22_DLW118_20C_male_01002_Statistics	45.48	WT	SYP2GFP	5358210	117815
0.767672	0.700019	LP	Male	DLW118	2021_10_22_DLW118_20C_male_01002_Statistics	54.35	WT	SYP2GFP	7437810	136850
0.745365	0.671217	LP	Male	DLW118	2021_10_22_DLW118_20C_male_01002_Statistics	61.43	WT	SYP2GFP	9942360	161849
0.723428	0.642892	MP	Male	DLW118	2021_10_22_DLW118_20C_male_01002_Statistics	57.88	WT	SYP2GFP	8752900	151225
0.684514	0.592646	MP	Male	DLW118	2021_10_22_DLW118_20C_male_01002_Statistics	53.65	WT	SYP2GFP	6966890	129858
0.653916	0.553139	MP	Male	DLW118	2021_10_22_DLW118_20C_male_01002_Statistics	57.1	WT	SYP2GFP	8256870	144604
0.629044	0.521024	MP	Male	DLW118	2021_10_22_DLW118_20C_male_01002_Statistics	56.24	WT	SYP2GFP	7717190	137219
0.70218	0.615457	MP	Male	DLW118	2021_10_22_DLW118_20C_male_01002_Statistics	57.53	WT	SYP2GFP	8702420	151268
0.621724	0.511573	MP	Male	DLW118	2021_10_22_DLW118_20C_male_01002_Statistics	44.18	WT	SYP2GFP	5920430	134007
0.641702	0.537367	MP	Male	DLW118	2021_10_22_DLW118_20C_male_01002_Statistics	46.78	WT	SYP2GFP	5335880	114063
0.985203	0.980894	LP	Male	DLW118	2021_10_22_DLW118_20C_male_01002_Statistics	52.19	WT	SYP2GFP	7276070	139415
0.939508	0.921894	LP	Male	DLW118	2021_10_22_DLW118_20C_male_01002_Statistics	48.49	WT	SYP2GFP	7100010	146422
0.927606	0.906525	LP	Male	DLW118	2021_10_22_DLW118_20C_male_01002_Statistics	55.89	WT	SYP2GFP	9075000	162373
0.900109	0.871022	LP	Male	DLW118	2021_10_22_DLW118_20C_male_01002_Statistics	50.58	WT	SYP2GFP	8055680	159266
0.971009	0.962567	LP	Male	DLW118	2021_10_22_DLW118_20C_male_01002_Statistics	51.36	WT	SYP2GFP	6283380	122340
0.885931	0.852715	LP	Male	DLW118	2021_10_22_DLW118_20C_male_01002_Statistics	52.2	WT	SYP2GFP	7206260	138051
0.920728	0.897645	LP	Male	DLW118	2021_10_22_DLW118_20C_male_01002_Statistics	47.12	WT	SYP2GFP	6297050	133639
0.0261811	-0.202833	TZ	Male	DLW118	2021_10_22_DLW118_20C_male_01003_Statistics	8.67	WT	SYP2GFP	665287	76734.4
0.00131085	-0.233552	TZ	Male	DLW118	2021_10_22_DLW118_20C_male_01003_Statistics	8.63	WT	SYP2GFP	715664	82927.5
0.0321797	-0.195423	TZ	Male	DLW118	2021_10_22_DLW118_20C_male_01003_Statistics	9.85	WT	SYP2GFP	812323	82469.3
0.00730912	-0.226143	TZ	Male	DLW118	2021_10_22_DLW118_20C_male_01003_Statistics	13	WT	SYP2GFP	1018830	78371.5
0.0433727	-0.181598	TZ	Male	DLW118	2021_10_22_DLW118_20C_male_01003_Statistics	12.14	WT	SYP2GFP	988325	81410.6
0.0788342	-0.137797	TZ	Male	DLW118	2021_10_22_DLW118_20C_male_01003_Statistics	25.17	WT	SYP2GFP	2089210	83004
0.0735208	-0.14436	TZ	Male	DLW118	2021_10_22_DLW118_20C_male_01003_Statistics	13.55	WT	SYP2GFP	1261030	93064.9
0.0568223	-0.164986	TZ	Male	DLW118	2021_10_22_DLW118_20C_male_01003_Statistics	10.96	WT	SYP2GFP	899251	82048.4
0.0987769	-0.113164	TZ	Male	DLW118	2021_10_22_DLW118_20C_male_01003_Statistics	13.02	WT	SYP2GFP	980179	75282.6
0.129505	-0.07521	TZ	Male	DLW118	2021_10_22_DLW118_20C_male_01003_Statistics	12.53	WT	SYP2GFP	897756	71648.5
0.18042	-0.0123218	TZ	Male	DLW118	2021_10_22_DLW118_20C_male_01003_Statistics	13.91	WT	SYP2GFP	1157450	83209.9
0.149985	-0.0499138	TZ	Male	DLW118	2021_10_22_DLW118_20C_male_01003_Statistics	13.58	WT	SYP2GFP	991534	73014.3
0.181107	-0.0114721	TZ	Male	DLW118	2021_10_22_DLW118_20C_male_01003_Statistics	16.24	WT	SYP2GFP	1291310	79514.2
0.298781	0.133875	EP	Male	DLW118	2021_10_22_DLW118_20C_male_01003_Statistics	19.95	WT	SYP2GFP	1705850	85506.3
0.288387	0.121037	EP	Male	DLW118	2021_10_22_DLW118_20C_male_01003_Statistics	20.93	WT	SYP2GFP	1741470	83204.5
0.230094	0.0490343	EP	Male	DLW118	2021_10_22_DLW118_20C_male_01003_Statistics	18.45	WT	SYP2GFP	1461880	79234.7
0.253113	0.0774671	EP	Male	DLW118	2021_10_22_DLW118_20C_male_01003_Statistics	21.76	WT	SYP2GFP	2118830	97372.7
0.270466	0.0989006	EP	Male	DLW118	2021_10_22_DLW118_20C_male_01003_Statistics	20.54	WT	SYP2GFP	1639240	79807.2
0.23864	0.0595906	EP	Male	DLW118	2021_10_22_DLW118_20C_male_01003_Statistics	15.65	WT	SYP2GFP	1284170	82055.6
0.218549	0.0347745	EP	Male	DLW118	2021_10_22_DLW118_20C_male_01003_Statistics	24.62	WT	SYP2GFP	2110130	85708
0.205289	0.0183962	EP	Male	DLW118	2021_10_22_DLW118_20C_male_01003_Statistics	16.66	WT	SYP2GFP	1406110	84400.4
0.386512	0.242237	EP	Male	DLW118	2021_10_22_DLW118_20C_male_01003_Statistics	36.96	WT	SYP2GFP	3710450	100391
0.369095	0.220725	EP	Male	DLW118	2021_10_22_DLW118_20C_male_01003_Statistics	35.54	WT	SYP2GFP	3279170	92267
0.35632	0.204946	EP	Male	DLW118	2021_10_22_DLW118_20C_male_01003_Statistics	28.61	WT	SYP2GFP	2941720	102821
0.330766	0.173382	EP	Male	DLW118	2021_10_22_DLW118_20C_male_01003_Statistics	23.39	WT	SYP2GFP	1934520	82707.1
0.350767	0.198086	EP	Male	DLW118	2021_10_22_DLW118_20C_male_01003_Statistics	32.43	WT	SYP2GFP	3310360	102077
0.330195	0.172677	EP	Male	DLW118	2021_10_22_DLW118_20C_male_01003_Statistics	21.75	WT	SYP2GFP	1942820	89325.1
0.493568	0.37447	MP	Male	DLW118	2021_10_22_DLW118_20C_male_01003_Statistics	38.75	WT	SYP2GFP	3400510	87755.1
0.50031	0.382798	MP	Male	DLW118	2021_10_22_DLW118_20C_male_01003_Statistics	41.26	WT	SYP2GFP	4401800	106684
0.461257	0.33456	MP	Male	DLW118	2021_10_22_DLW118_20C_male_01003_Statistics	33.6	WT	SYP2GFP	3116210	92744.3
0.401874	0.261212	EP	Male	DLW118	2021_10_22_DLW118_20C_male_01003_Statistics	31.22	WT	SYP2GFP	2860140	91612.4
0.429205	0.294971	EP	Male	DLW118	2021_10_22_DLW118_20C_male_01003_Statistics	36.77	WT	SYP2GFP	3627070	98642.1
0.461235	0.334534	MP	Male	DLW118	2021_10_22_DLW118_20C_male_01003_Statistics	38.28	WT	SYP2GFP	3678320	96089.9
0.469235	0.344415	MP	Male	DLW118	2021_10_22_DLW118_20C_male_01003_Statistics	39.96	WT	SYP2GFP	4156550	104018
0.415256	0.277742	EP	Male	DLW118	2021_10_22_DLW118_20C_male_01003_Statistics	37.55	WT	SYP2GFP	3748090	99816
0.566855	0.464992	MP	Male	DLW118	2021_10_22_DLW118_20C_male_01003_Statistics	38.72	WT	SYP2GFP	3491400	90170.5
0.522759	0.410526	MP	Male	DLW118	2021_10_22_DLW118_20C_male_01003_Statistics	42.73	WT	SYP2GFP	4295920	100536
0.544053	0.436827	MP	Male	DLW118	2021_10_22_DLW118_20C_male_01003_Statistics	42.47	WT	SYP2GFP	4559760	107364
0.585656	0.488214	MP	Male	DLW118	2021_10_22_DLW118_20C_male_01003_Statistics	43.88	WT	SYP2GFP	4777910	108886
0.662597	0.58325	MP	Male	DLW118	2021_10_22_DLW118_20C_male_01003_Statistics	45.06	WT	SYP2GFP	5209000	115601
0.599306	0.505075	MP	Male	DLW118	2021_10_22_DLW118_20C_male_01003_Statistics	43.85	WT	SYP2GFP	4443280	101329
0.630624	0.543758	MP	Male	DLW118	2021_10_22_DLW118_20C_male_01003_Statistics	42.85	WT	SYP2GFP	4528030	105672
0.664268	0.585313	MP	Male	DLW118	2021_10_22_DLW118_20C_male_01003_Statistics	51.6	WT	SYP2GFP	6439340	124793
0.627617	0.540044	MP	Male	DLW118	2021_10_22_DLW118_20C_male_01003_Statistics	47.43	WT	SYP2GFP	5344120	112674
0.77144	0.71769	LP	Male	DLW118	2021_10_22_DLW118_20C_male_01003_Statistics	57.38	WT	SYP2GFP	7719060	134525
0.728814	0.665039	MP	Male	DLW118	2021_10_22_DLW118_20C_male_01003_Statistics	50.62	WT	SYP2GFP	5429070	107251
0.768017	0.713462	LP	Male	DLW118	2021_10_22_DLW118_20C_male_01003_Statistics	52.81	WT	SYP2GFP	7916430	149904
0.698261	0.6273	MP	Male	DLW118	2021_10_22_DLW118_20C_male_01003_Statistics	55.1	WT	SYP2GFP	6475040	117514
0.728393	0.664519	MP	Male	DLW118	2021_10_22_DLW118_20C_male_01003_Statistics	58.37	WT	SYP2GFP	7986100	136819
0.749111	0.690109	LP	Male	DLW118	2021_10_22_DLW118_20C_male_01003_Statistics	53.39	WT	SYP2GFP	6553970	122757
0.700798	0.630434	MP	Male	DLW118	2021_10_22_DLW118_20C_male_01003_Statistics	59.58	WT	SYP2GFP	7649040	128383
0.818964	0.77639	LP	Male	DLW118	2021_10_22_DLW118_20C_male_01003_Statistics	55.75	WT	SYP2GFP	7667400	137532
0.8555	0.821518	LP	Male	DLW118	2021_10_22_DLW118_20C_male_01003_Statistics	49.88	WT	SYP2GFP	6479470	129901
0.830728	0.79092	LP	Male	DLW118	2021_10_22_DLW118_20C_male_01003_Statistics	52.75	WT	SYP2GFP	7397070	140229
0.800941	0.754128	LP	Male	DLW118	2021_10_22_DLW118_20C_male_01003_Statistics	52.26	WT	SYP2GFP	7996940	153022
0.831993	0.792483	LP	Male	DLW118	2021_10_22_DLW118_20C_male_01003_Statistics	51.4	WT	SYP2GFP	5652950	109980
0.782189	0.730967	LP	Male	DLW118	2021_10_22_DLW118_20C_male_01003_Statistics	59.69	WT	SYP2GFP	9300810	155819
0.873375	0.843596	LP	Male	DLW118	2021_10_22_DLW118_20C_male_01003_Statistics	58.27	WT	SYP2GFP	7738800	132809
0.912249	0.891612	LP	Male	DLW118	2021_10_22_DLW118_20C_male_01003_Statistics	57.6	WT	SYP2GFP	7287890	126526
0.962242	0.953363	LP	Male	DLW118	2021_10_22_DLW118_20C_male_01003_Statistics	55.75	WT	SYP2GFP	6717400	120491
0.866339	0.834905	LP	Male	DLW118	2021_10_22_DLW118_20C_male_01003_Statistics	49.8	WT	SYP2GFP	6512520	130773
0.890707	0.865004	LP	Male	DLW118	2021_10_22_DLW118_20C_male_01003_Statistics	53.89	WT	SYP2GFP	7681240	142536
0.932924	0.91715	LP	Male	DLW118	2021_10_22_DLW118_20C_male_01003_Statistics	51.98	WT	SYP2GFP	6719810	129277
0.976562	0.97105	LP	Male	DLW118	2021_10_22_DLW118_20C_male_01003_Statistics	49.5	WT	SYP2GFP	6201480	125282
0.931992	0.915998	LP	Male	DLW118	2021_10_22_DLW118_20C_male_01003_Statistics	48.93	WT	SYP2GFP	5457060	111528
0.898509	0.874642	LP	Male	DLW118	2021_10_22_DLW118_20C_male_01003_Statistics	50.86	WT	SYP2GFP	6059190	119135
0.968388	0.960954	LP	Male	DLW118	2021_10_22_DLW118_20C_male_01003_Statistics	51.55	WT	SYP2GFP	5579680	108238
0.0361074	-0.205416	TZ	Herm	DLW192	2022_01_10_DLW192_gfpsyp2_herm_01_Statistics	7.92	spo-11	SYP2GFP	1101940	139134
0.0285497	-0.214867	TZ	Herm	DLW192	2022_01_10_DLW192_gfpsyp2_herm_01_Statistics	11.22	spo-11	SYP2GFP	1536800	136970
0.0170629	-0.229232	TZ	Herm	DLW192	2022_01_10_DLW192_gfpsyp2_herm_01_Statistics	7.58	spo-11	SYP2GFP	1027140	135507
0.0432849	-0.19644	TZ	Herm	DLW192	2022_01_10_DLW192_gfpsyp2_herm_01_Statistics	11.04	spo-11	SYP2GFP	1495340	135447
0.0561767	-0.180318	TZ	Herm	DLW192	2022_01_10_DLW192_gfpsyp2_herm_01_Statistics	11.78	spo-11	SYP2GFP	1551940	131744
0.0652686	-0.168948	TZ	Herm	DLW192	2022_01_10_DLW192_gfpsyp2_herm_01_Statistics	11.32	spo-11	SYP2GFP	1691200	149399
0.0783093	-0.152639	TZ	Herm	DLW192	2022_01_10_DLW192_gfpsyp2_herm_01_Statistics	12.21	spo-11	SYP2GFP	1669480	136731
0.0824308	-0.147485	TZ	Herm	DLW192	2022_01_10_DLW192_gfpsyp2_herm_01_Statistics	12.57	spo-11	SYP2GFP	1865520	148411
0.0961567	-0.13032	TZ	Herm	DLW192	2022_01_10_DLW192_gfpsyp2_herm_01_Statistics	13.34	spo-11	SYP2GFP	1996320	149649
0.0761211	-0.155376	TZ	Herm	DLW192	2022_01_10_DLW192_gfpsyp2_herm_01_Statistics	9.6	spo-11	SYP2GFP	1351780	140810
0.0504785	-0.187444	TZ	Herm	DLW192	2022_01_10_DLW192_gfpsyp2_herm_01_Statistics	10.26	spo-11	SYP2GFP	1355250	132091
0.118055	-0.102934	TZ	Herm	DLW192	2022_01_10_DLW192_gfpsyp2_herm_01_Statistics	13.24	spo-11	SYP2GFP	2086800	157613
0.102408	-0.122503	TZ	Herm	DLW192	2022_01_10_DLW192_gfpsyp2_herm_01_Statistics	13.27	spo-11	SYP2GFP	1997470	150525
0.0773002	-0.153901	TZ	Herm	DLW192	2022_01_10_DLW192_gfpsyp2_herm_01_Statistics	11.26	spo-11	SYP2GFP	1578360	140174
0.0901295	-0.137857	TZ	Herm	DLW192	2022_01_10_DLW192_gfpsyp2_herm_01_Statistics	12.09	spo-11	SYP2GFP	1698710	140505
0.100955	-0.124319	TZ	Herm	DLW192	2022_01_10_DLW192_gfpsyp2_herm_01_Statistics	15.43	spo-11	SYP2GFP	2256470	146239
0.11513	-0.106592	TZ	Herm	DLW192	2022_01_10_DLW192_gfpsyp2_herm_01_Statistics	13.04	spo-11	SYP2GFP	1963420	150569
0.0729524	-0.159339	TZ	Herm	DLW192	2022_01_10_DLW192_gfpsyp2_herm_01_Statistics	11.88	spo-11	SYP2GFP	1592410	134041
0.145759	-0.068289	TZ	Herm	DLW192	2022_01_10_DLW192_gfpsyp2_herm_01_Statistics	13.96	spo-11	SYP2GFP	1883770	134941
0.0995359	-0.126094	TZ	Herm	DLW192	2022_01_10_DLW192_gfpsyp2_herm_01_Statistics	13.69	spo-11	SYP2GFP	1983540	144890
0.152477	-0.0598874	TZ	Herm	DLW192	2022_01_10_DLW192_gfpsyp2_herm_01_Statistics	15.52	spo-11	SYP2GFP	2395710	154363
0.167671	-0.0408863	TZ	Herm	DLW192	2022_01_10_DLW192_gfpsyp2_herm_01_Statistics	15.08	spo-11	SYP2GFP	2358980	156431
0.178846	-0.0269113	TZ	Herm	DLW192	2022_01_10_DLW192_gfpsyp2_herm_01_Statistics	14.84	spo-11	SYP2GFP	2228200	150148
0.122683	-0.0971467	TZ	Herm	DLW192	2022_01_10_DLW192_gfpsyp2_herm_01_Statistics	11.35	spo-11	SYP2GFP	1638130	144329
0.16014	-0.0503043	TZ	Herm	DLW192	2022_01_10_DLW192_gfpsyp2_herm_01_Statistics	14.76	spo-11	SYP2GFP	2086410	141356
0.124818	-0.0944775	TZ	Herm	DLW192	2022_01_10_DLW192_gfpsyp2_herm_01_Statistics	11.98	spo-11	SYP2GFP	1663500	138856
0.176747	-0.0295357	TZ	Herm	DLW192	2022_01_10_DLW192_gfpsyp2_herm_01_Statistics	15.96	spo-11	SYP2GFP	2668550	167202
0.189452	-0.0136473	TZ	Herm	DLW192	2022_01_10_DLW192_gfpsyp2_herm_01_Statistics	15.22	spo-11	SYP2GFP	2423420	159226
0.165756	-0.043281	TZ	Herm	DLW192	2022_01_10_DLW192_gfpsyp2_herm_01_Statistics	16.5	spo-11	SYP2GFP	2707250	164076
0.165526	-0.0435681	TZ	Herm	DLW192	2022_01_10_DLW192_gfpsyp2_herm_01_Statistics	10.5	spo-11	SYP2GFP	1503670	143207
0.181428	-0.0236816	TZ	Herm	DLW192	2022_01_10_DLW192_gfpsyp2_herm_01_Statistics	14.98	spo-11	SYP2GFP	2242840	149722
0.184503	-0.0198371	TZ	Herm	DLW192	2022_01_10_DLW192_gfpsyp2_herm_01_Statistics	17.95	spo-11	SYP2GFP	3074720	171294
0.201366	0.00125219	EP	Herm	DLW192	2022_01_10_DLW192_gfpsyp2_herm_01_Statistics	21.16	spo-11	SYP2GFP	3328110	157283
0.21514	0.018477	EP	Herm	DLW192	2022_01_10_DLW192_gfpsyp2_herm_01_Statistics	21.3	spo-11	SYP2GFP	3387190	159023
0.233042	0.0408647	EP	Herm	DLW192	2022_01_10_DLW192_gfpsyp2_herm_01_Statistics	19.03	spo-11	SYP2GFP	3223140	169372
0.268405	0.0850882	EP	Herm	DLW192	2022_01_10_DLW192_gfpsyp2_herm_01_Statistics	20.05	spo-11	SYP2GFP	3473990	173266
0.230506	0.0376938	EP	Herm	DLW192	2022_01_10_DLW192_gfpsyp2_herm_01_Statistics	20.98	spo-11	SYP2GFP	3594430	171327
0.247198	0.0585673	EP	Herm	DLW192	2022_01_10_DLW192_gfpsyp2_herm_01_Statistics	20.61	spo-11	SYP2GFP	3523580	170965
0.318487	0.14772	EP	Herm	DLW192	2022_01_10_DLW192_gfpsyp2_herm_01_Statistics	19.65	spo-11	SYP2GFP	3345420	170250
0.279818	0.0993612	EP	Herm	DLW192	2022_01_10_DLW192_gfpsyp2_herm_01_Statistics	22.75	spo-11	SYP2GFP	3850180	169239
0.334715	0.168015	EP	Herm	DLW192	2022_01_10_DLW192_gfpsyp2_herm_01_Statistics	35.58	spo-11	SYP2GFP	6484440	182250
0.309388	0.136341	EP	Herm	DLW192	2022_01_10_DLW192_gfpsyp2_herm_01_Statistics	19.35	spo-11	SYP2GFP	3632260	187714
0.249424	0.0613517	EP	Herm	DLW192	2022_01_10_DLW192_gfpsyp2_herm_01_Statistics	20.91	spo-11	SYP2GFP	3681930	176085
0.33985	0.174435	EP	Herm	DLW192	2022_01_10_DLW192_gfpsyp2_herm_01_Statistics	16.63	spo-11	SYP2GFP	3227370	194069
0.21044	0.0125989	EP	Herm	DLW192	2022_01_10_DLW192_gfpsyp2_herm_01_Statistics	16.76	spo-11	SYP2GFP	2760620	164715
0.225203	0.031062	EP	Herm	DLW192	2022_01_10_DLW192_gfpsyp2_herm_01_Statistics	19.14	spo-11	SYP2GFP	3658150	191126
0.264196	0.0798254	EP	Herm	DLW192	2022_01_10_DLW192_gfpsyp2_herm_01_Statistics	21.55	spo-11	SYP2GFP	3584800	166348
0.352177	0.189851	EP	Herm	DLW192	2022_01_10_DLW192_gfpsyp2_herm_01_Statistics	27.16	spo-11	SYP2GFP	5298100	195070
0.229597	0.0365563	EP	Herm	DLW192	2022_01_10_DLW192_gfpsyp2_herm_01_Statistics	23.43	spo-11	SYP2GFP	4112690	175531
0.28858	0.110319	EP	Herm	DLW192	2022_01_10_DLW192_gfpsyp2_herm_01_Statistics	17.56	spo-11	SYP2GFP	3082670	175551
0.30076	0.125551	EP	Herm	DLW192	2022_01_10_DLW192_gfpsyp2_herm_01_Statistics	24.02	spo-11	SYP2GFP	4287080	178480
0.363492	0.204002	EP	Herm	DLW192	2022_01_10_DLW192_gfpsyp2_herm_01_Statistics	22.75	spo-11	SYP2GFP	4306730	189307
0.273666	0.0916684	EP	Herm	DLW192	2022_01_10_DLW192_gfpsyp2_herm_01_Statistics	23.76	spo-11	SYP2GFP	4221510	177673
0.24326	0.0536433	EP	Herm	DLW192	2022_01_10_DLW192_gfpsyp2_herm_01_Statistics	23.8	spo-11	SYP2GFP	4258880	178945
0.342543	0.177803	EP	Herm	DLW192	2022_01_10_DLW192_gfpsyp2_herm_01_Statistics	26.67	spo-11	SYP2GFP	4946760	185480
0.263187	0.078563	EP	Herm	DLW192	2022_01_10_DLW192_gfpsyp2_herm_01_Statistics	17.11	spo-11	SYP2GFP	2871810	167844
0.364963	0.205841	EP	Herm	DLW192	2022_01_10_DLW192_gfpsyp2_herm_01_Statistics	26.09	spo-11	SYP2GFP	5043720	193320
0.300074	0.124693	EP	Herm	DLW192	2022_01_10_DLW192_gfpsyp2_herm_01_Statistics	26.3	spo-11	SYP2GFP	4871270	185219
0.330564	0.162823	EP	Herm	DLW192	2022_01_10_DLW192_gfpsyp2_herm_01_Statistics	24.74	spo-11	SYP2GFP	4575420	184940
0.281973	0.102057	EP	Herm	DLW192	2022_01_10_DLW192_gfpsyp2_herm_01_Statistics	19.24	spo-11	SYP2GFP	3407560	177108
0.312152	0.139797	EP	Herm	DLW192	2022_01_10_DLW192_gfpsyp2_herm_01_Statistics	25.71	spo-11	SYP2GFP	4705330	183016
0.273774	0.0918033	EP	Herm	DLW192	2022_01_10_DLW192_gfpsyp2_herm_01_Statistics	19.76	spo-11	SYP2GFP	3428290	173496
0.380688	0.225507	EP	Herm	DLW192	2022_01_10_DLW192_gfpsyp2_herm_01_Statistics	24.68	spo-11	SYP2GFP	4621050	187239
0.294335	0.117516	EP	Herm	DLW192	2022_01_10_DLW192_gfpsyp2_herm_01_Statistics	26.18	spo-11	SYP2GFP	4752970	181550
0.321661	0.15169	EP	Herm	DLW192	2022_01_10_DLW192_gfpsyp2_herm_01_Statistics	28.64	spo-11	SYP2GFP	5533960	193225
0.35336	0.191331	EP	Herm	DLW192	2022_01_10_DLW192_gfpsyp2_herm_01_Statistics	26.55	spo-11	SYP2GFP	4770210	179669
0.314646	0.142916	EP	Herm	DLW192	2022_01_10_DLW192_gfpsyp2_herm_01_Statistics	26.36	spo-11	SYP2GFP	4732940	179550
0.365778	0.206861	EP	Herm	DLW192	2022_01_10_DLW192_gfpsyp2_herm_01_Statistics	30.16	spo-11	SYP2GFP	5765140	191152
0.334731	0.168034	EP	Herm	DLW192	2022_01_10_DLW192_gfpsyp2_herm_01_Statistics	28.22	spo-11	SYP2GFP	5729000	203012
0.360316	0.20003	EP	Herm	DLW192	2022_01_10_DLW192_gfpsyp2_herm_01_Statistics	32.89	spo-11	SYP2GFP	6093490	185269
0.38373	0.229311	EP	Herm	DLW192	2022_01_10_DLW192_gfpsyp2_herm_01_Statistics	26.53	spo-11	SYP2GFP	5144740	193922
0.35175	0.189317	EP	Herm	DLW192	2022_01_10_DLW192_gfpsyp2_herm_01_Statistics	27.6	spo-11	SYP2GFP	5112010	185218
0.382311	0.227537	EP	Herm	DLW192	2022_01_10_DLW192_gfpsyp2_herm_01_Statistics	27.27	spo-11	SYP2GFP	5413530	198516
0.372698	0.215515	EP	Herm	DLW192	2022_01_10_DLW192_gfpsyp2_herm_01_Statistics	25.85	spo-11	SYP2GFP	4598990	177911
0.399614	0.249175	EP	Herm	DLW192	2022_01_10_DLW192_gfpsyp2_herm_01_Statistics	24.83	spo-11	SYP2GFP	4929200	198518
0.417515	0.271562	EP	Herm	DLW192	2022_01_10_DLW192_gfpsyp2_herm_01_Statistics	27.92	spo-11	SYP2GFP	5431510	194538
0.440651	0.300494	EP	Herm	DLW192	2022_01_10_DLW192_gfpsyp2_herm_01_Statistics	27.63	spo-11	SYP2GFP	5534110	200294
0.404703	0.255539	EP	Herm	DLW192	2022_01_10_DLW192_gfpsyp2_herm_01_Statistics	30.43	spo-11	SYP2GFP	6107000	200690
0.389559	0.236601	EP	Herm	DLW192	2022_01_10_DLW192_gfpsyp2_herm_01_Statistics	29.51	spo-11	SYP2GFP	5610920	190136
0.426721	0.283074	EP	Herm	DLW192	2022_01_10_DLW192_gfpsyp2_herm_01_Statistics	27.83	spo-11	SYP2GFP	6011840	216020
0.479606	0.34921	MP	Herm	DLW192	2022_01_10_DLW192_gfpsyp2_herm_01_Statistics	26.35	spo-11	SYP2GFP	5981260	226993
0.407592	0.259152	EP	Herm	DLW192	2022_01_10_DLW192_gfpsyp2_herm_01_Statistics	25.7	spo-11	SYP2GFP	4979470	193754
0.407683	0.259265	EP	Herm	DLW192	2022_01_10_DLW192_gfpsyp2_herm_01_Statistics	32.65	spo-11	SYP2GFP	6671640	204338
0.515728	0.394383	MP	Herm	DLW192	2022_01_10_DLW192_gfpsyp2_herm_01_Statistics	24.05	spo-11	SYP2GFP	5087780	211550
0.53488	0.418334	MP	Herm	DLW192	2022_01_10_DLW192_gfpsyp2_herm_01_Statistics	36.28	spo-11	SYP2GFP	7733830	213171
0.444985	0.305914	EP	Herm	DLW192	2022_01_10_DLW192_gfpsyp2_herm_01_Statistics	26.24	spo-11	SYP2GFP	5660710	215728
0.466186	0.332428	EP	Herm	DLW192	2022_01_10_DLW192_gfpsyp2_herm_01_Statistics	29.28	spo-11	SYP2GFP	6355010	217043
0.567574	0.459221	MP	Herm	DLW192	2022_01_10_DLW192_gfpsyp2_herm_01_Statistics	28.08	spo-11	SYP2GFP	6182800	220185
0.483216	0.353725	MP	Herm	DLW192	2022_01_10_DLW192_gfpsyp2_herm_01_Statistics	27.64	spo-11	SYP2GFP	6281210	227251
0.498405	0.37272	MP	Herm	DLW192	2022_01_10_DLW192_gfpsyp2_herm_01_Statistics	21.79	spo-11	SYP2GFP	4647110	213268
0.550054	0.437311	MP	Herm	DLW192	2022_01_10_DLW192_gfpsyp2_herm_01_Statistics	26.32	spo-11	SYP2GFP	5917540	224831
0.530786	0.413215	MP	Herm	DLW192	2022_01_10_DLW192_gfpsyp2_herm_01_Statistics	37.72	spo-11	SYP2GFP	8520440	225887
0.449622	0.311713	EP	Herm	DLW192	2022_01_10_DLW192_gfpsyp2_herm_01_Statistics	30.41	spo-11	SYP2GFP	6330920	208185
0.519082	0.398578	MP	Herm	DLW192	2022_01_10_DLW192_gfpsyp2_herm_01_Statistics	28.66	spo-11	SYP2GFP	6205570	216524
0.391431	0.238941	EP	Herm	DLW192	2022_01_10_DLW192_gfpsyp2_herm_01_Statistics	30.51	spo-11	SYP2GFP	5940830	194717
0.425328	0.281332	EP	Herm	DLW192	2022_01_10_DLW192_gfpsyp2_herm_01_Statistics	27.93	spo-11	SYP2GFP	6107520	218672
0.406235	0.257455	EP	Herm	DLW192	2022_01_10_DLW192_gfpsyp2_herm_01_Statistics	30.02	spo-11	SYP2GFP	6388040	212793
0.465367	0.331404	EP	Herm	DLW192	2022_01_10_DLW192_gfpsyp2_herm_01_Statistics	27.12	spo-11	SYP2GFP	6286370	231798
0.446297	0.307556	EP	Herm	DLW192	2022_01_10_DLW192_gfpsyp2_herm_01_Statistics	29.02	spo-11	SYP2GFP	6327880	218052
0.483051	0.353518	MP	Herm	DLW192	2022_01_10_DLW192_gfpsyp2_herm_01_Statistics	25.25	spo-11	SYP2GFP	5574120	220757
0.570229	0.462541	MP	Herm	DLW192	2022_01_10_DLW192_gfpsyp2_herm_01_Statistics	36.04	spo-11	SYP2GFP	7957640	220800
0.542009	0.42725	MP	Herm	DLW192	2022_01_10_DLW192_gfpsyp2_herm_01_Statistics	33.17	spo-11	SYP2GFP	7446150	224484
0.420407	0.275178	EP	Herm	DLW192	2022_01_10_DLW192_gfpsyp2_herm_01_Statistics	26.1	spo-11	SYP2GFP	5615310	215146
0.431596	0.28917	EP	Herm	DLW192	2022_01_10_DLW192_gfpsyp2_herm_01_Statistics	28	spo-11	SYP2GFP	5942080	212217
0.487571	0.359171	MP	Herm	DLW192	2022_01_10_DLW192_gfpsyp2_herm_01_Statistics	25.81	spo-11	SYP2GFP	6605680	255935
0.449197	0.311182	EP	Herm	DLW192	2022_01_10_DLW192_gfpsyp2_herm_01_Statistics	35.52	spo-11	SYP2GFP	7514540	211558
0.565973	0.457218	MP	Herm	DLW192	2022_01_10_DLW192_gfpsyp2_herm_01_Statistics	42.18	spo-11	SYP2GFP	9575840	227023
0.46723	0.333734	MP	Herm	DLW192	2022_01_10_DLW192_gfpsyp2_herm_01_Statistics	37.63	spo-11	SYP2GFP	8030880	213417
0.525267	0.406313	MP	Herm	DLW192	2022_01_10_DLW192_gfpsyp2_herm_01_Statistics	35.14	spo-11	SYP2GFP	7933650	225773
0.589541	0.486692	MP	Herm	DLW192	2022_01_10_DLW192_gfpsyp2_herm_01_Statistics	34.65	spo-11	SYP2GFP	8309850	239823
0.475422	0.343978	MP	Herm	DLW192	2022_01_10_DLW192_gfpsyp2_herm_01_Statistics	34.09	spo-11	SYP2GFP	7110930	208593
0.511826	0.389504	MP	Herm	DLW192	2022_01_10_DLW192_gfpsyp2_herm_01_Statistics	29.06	spo-11	SYP2GFP	7475740	257252
0.53593	0.419648	MP	Herm	DLW192	2022_01_10_DLW192_gfpsyp2_herm_01_Statistics	34.04	spo-11	SYP2GFP	8493150	249505
0.584596	0.480508	MP	Herm	DLW192	2022_01_10_DLW192_gfpsyp2_herm_01_Statistics	38.83	spo-11	SYP2GFP	8647800	222709
0.518876	0.39832	MP	Herm	DLW192	2022_01_10_DLW192_gfpsyp2_herm_01_Statistics	35.83	spo-11	SYP2GFP	7851770	219140
0.561246	0.451307	MP	Herm	DLW192	2022_01_10_DLW192_gfpsyp2_herm_01_Statistics	47	spo-11	SYP2GFP	11859200	252323
0.545731	0.431904	MP	Herm	DLW192	2022_01_10_DLW192_gfpsyp2_herm_01_Statistics	44.04	spo-11	SYP2GFP	10440900	237078
0.566792	0.458243	MP	Herm	DLW192	2022_01_10_DLW192_gfpsyp2_herm_01_Statistics	27.12	spo-11	SYP2GFP	6772540	249725
0.590991	0.488505	MP	Herm	DLW192	2022_01_10_DLW192_gfpsyp2_herm_01_Statistics	37.62	spo-11	SYP2GFP	9141250	242989
0.603491	0.504138	MP	Herm	DLW192	2022_01_10_DLW192_gfpsyp2_herm_01_Statistics	34.98	spo-11	SYP2GFP	7981400	228170
0.622415	0.527804	MP	Herm	DLW192	2022_01_10_DLW192_gfpsyp2_herm_01_Statistics	37.99	spo-11	SYP2GFP	9019070	237406
0.660162	0.575009	MP	Herm	DLW192	2022_01_10_DLW192_gfpsyp2_herm_01_Statistics	46.56	spo-11	SYP2GFP	11048300	237292
0.682596	0.603064	MP	Herm	DLW192	2022_01_10_DLW192_gfpsyp2_herm_01_Statistics	48.02	spo-11	SYP2GFP	11286900	235046
0.718517	0.647985	MP	Herm	DLW192	2022_01_10_DLW192_gfpsyp2_herm_01_Statistics	37.56	spo-11	SYP2GFP	8723170	232246
0.646694	0.558166	MP	Herm	DLW192	2022_01_10_DLW192_gfpsyp2_herm_01_Statistics	40.22	spo-11	SYP2GFP	10067400	250308
0.611843	0.514583	MP	Herm	DLW192	2022_01_10_DLW192_gfpsyp2_herm_01_Statistics	39.81	spo-11	SYP2GFP	8962810	225140
0.706318	0.632729	MP	Herm	DLW192	2022_01_10_DLW192_gfpsyp2_herm_01_Statistics	33.21	spo-11	SYP2GFP	7879060	237250
0.743819	0.679628	LP	Herm	DLW192	2022_01_10_DLW192_gfpsyp2_herm_01_Statistics	46.83	spo-11	SYP2GFP	10947800	233777
0.630877	0.538386	MP	Herm	DLW192	2022_01_10_DLW192_gfpsyp2_herm_01_Statistics	43.41	spo-11	SYP2GFP	10320500	237745
0.767581	0.709344	LP	Herm	DLW192	2022_01_10_DLW192_gfpsyp2_herm_01_Statistics	48.42	spo-11	SYP2GFP	10282900	212369
0.669698	0.586933	MP	Herm	DLW192	2022_01_10_DLW192_gfpsyp2_herm_01_Statistics	38.12	spo-11	SYP2GFP	11003900	288665
0.731815	0.664615	MP	Herm	DLW192	2022_01_10_DLW192_gfpsyp2_herm_01_Statistics	33.35	spo-11	SYP2GFP	7925110	237634
0.612702	0.515657	MP	Herm	DLW192	2022_01_10_DLW192_gfpsyp2_herm_01_Statistics	42.98	spo-11	SYP2GFP	10221000	237808
0.758311	0.69775	LP	Herm	DLW192	2022_01_10_DLW192_gfpsyp2_herm_01_Statistics	32.35	spo-11	SYP2GFP	6606180	204210
0.693697	0.616947	MP	Herm	DLW192	2022_01_10_DLW192_gfpsyp2_herm_01_Statistics	53.02	spo-11	SYP2GFP	12683000	239212
0.65337	0.566515	MP	Herm	DLW192	2022_01_10_DLW192_gfpsyp2_herm_01_Statistics	32.35	spo-11	SYP2GFP	7480330	231231
0.679712	0.599457	MP	Herm	DLW192	2022_01_10_DLW192_gfpsyp2_herm_01_Statistics	37.33	spo-11	SYP2GFP	8661880	232035
0.783754	0.729568	LP	Herm	DLW192	2022_01_10_DLW192_gfpsyp2_herm_01_Statistics	44.4	spo-11	SYP2GFP	10248300	230818
0.63981	0.549557	MP	Herm	DLW192	2022_01_10_DLW192_gfpsyp2_herm_01_Statistics	41.68	spo-11	SYP2GFP	9534170	228747
0.722721	0.653243	MP	Herm	DLW192	2022_01_10_DLW192_gfpsyp2_herm_01_Statistics	29.69	spo-11	SYP2GFP	6889630	232052
0.705166	0.631289	MP	Herm	DLW192	2022_01_10_DLW192_gfpsyp2_herm_01_Statistics	37.96	spo-11	SYP2GFP	8740310	230251
0.746952	0.683546	LP	Herm	DLW192	2022_01_10_DLW192_gfpsyp2_herm_01_Statistics	44.17	spo-11	SYP2GFP	11029800	249712
0.624406	0.530293	MP	Herm	DLW192	2022_01_10_DLW192_gfpsyp2_herm_01_Statistics	49.68	spo-11	SYP2GFP	11593800	233370
0.610931	0.513442	MP	Herm	DLW192	2022_01_10_DLW192_gfpsyp2_herm_01_Statistics	48.57	spo-11	SYP2GFP	11909500	245203
0.777172	0.721338	LP	Herm	DLW192	2022_01_10_DLW192_gfpsyp2_herm_01_Statistics	51.92	spo-11	SYP2GFP	11821600	227689
0.663473	0.579149	MP	Herm	DLW192	2022_01_10_DLW192_gfpsyp2_herm_01_Statistics	37.21	spo-11	SYP2GFP	8685150	233409
0.691486	0.614181	MP	Herm	DLW192	2022_01_10_DLW192_gfpsyp2_herm_01_Statistics	48.44	spo-11	SYP2GFP	11943700	246567
0.653296	0.566422	MP	Herm	DLW192	2022_01_10_DLW192_gfpsyp2_herm_01_Statistics	38.98	spo-11	SYP2GFP	10185400	261298
0.733133	0.666264	MP	Herm	DLW192	2022_01_10_DLW192_gfpsyp2_herm_01_Statistics	41.08	spo-11	SYP2GFP	9945820	242109
0.764216	0.705135	LP	Herm	DLW192	2022_01_10_DLW192_gfpsyp2_herm_01_Statistics	47.28	spo-11	SYP2GFP	10377200	219484
0.637196	0.546288	MP	Herm	DLW192	2022_01_10_DLW192_gfpsyp2_herm_01_Statistics	51.01	spo-11	SYP2GFP	12484700	244750
0.686573	0.608037	MP	Herm	DLW192	2022_01_10_DLW192_gfpsyp2_herm_01_Statistics	39.34	spo-11	SYP2GFP	9121440	231862
0.712703	0.640714	MP	Herm	DLW192	2022_01_10_DLW192_gfpsyp2_herm_01_Statistics	26.93	spo-11	SYP2GFP	6074270	225558
0.748204	0.685111	LP	Herm	DLW192	2022_01_10_DLW192_gfpsyp2_herm_01_Statistics	37.28	spo-11	SYP2GFP	9132310	244965
0.780074	0.724967	LP	Herm	DLW192	2022_01_10_DLW192_gfpsyp2_herm_01_Statistics	50.41	spo-11	SYP2GFP	10373000	205773
0.730182	0.662574	MP	Herm	DLW192	2022_01_10_DLW192_gfpsyp2_herm_01_Statistics	35.05	spo-11	SYP2GFP	7474780	213260
0.763072	0.703705	LP	Herm	DLW192	2022_01_10_DLW192_gfpsyp2_herm_01_Statistics	43.23	spo-11	SYP2GFP	9401590	217478
0.864274	0.830264	LP	Herm	DLW192	2022_01_10_DLW192_gfpsyp2_herm_01_Statistics	41.69	spo-11	SYP2GFP	9527800	228539
0.815366	0.769102	LP	Herm	DLW192	2022_01_10_DLW192_gfpsyp2_herm_01_Statistics	42.05	spo-11	SYP2GFP	9469820	225204
0.840766	0.800866	LP	Herm	DLW192	2022_01_10_DLW192_gfpsyp2_herm_01_Statistics	44.52	spo-11	SYP2GFP	10081700	226453
0.808142	0.760069	LP	Herm	DLW192	2022_01_10_DLW192_gfpsyp2_herm_01_Statistics	47.09	spo-11	SYP2GFP	11544700	245162
0.935103	0.918841	LP	Herm	DLW192	2022_01_10_DLW192_gfpsyp2_herm_01_Statistics	27.22	spo-11	SYP2GFP	5914930	217301
0.961081	0.951329	LP	Herm	DLW192	2022_01_10_DLW192_gfpsyp2_herm_01_Statistics	43.21	spo-11	SYP2GFP	9726630	225101
0.883069	0.85377	LP	Herm	DLW192	2022_01_10_DLW192_gfpsyp2_herm_01_Statistics	34.48	spo-11	SYP2GFP	8466730	245555
0.903852	0.87976	LP	Herm	DLW192	2022_01_10_DLW192_gfpsyp2_herm_01_Statistics	39.21	spo-11	SYP2GFP	8445880	215401
0.867205	0.83393	LP	Herm	DLW192	2022_01_10_DLW192_gfpsyp2_herm_01_Statistics	38.08	spo-11	SYP2GFP	8936780	234684
0.92479	0.905944	LP	Herm	DLW192	2022_01_10_DLW192_gfpsyp2_herm_01_Statistics	31.66	spo-11	SYP2GFP	6102350	192746
0.835445	0.794212	LP	Herm	DLW192	2022_01_10_DLW192_gfpsyp2_herm_01_Statistics	35.97	spo-11	SYP2GFP	6895560	191703
0.794914	0.743526	LP	Herm	DLW192	2022_01_10_DLW192_gfpsyp2_herm_01_Statistics	40.54	spo-11	SYP2GFP	7450080	183771
0.826431	0.78294	LP	Herm	DLW192	2022_01_10_DLW192_gfpsyp2_herm_01_Statistics	49.53	spo-11	SYP2GFP	11138400	224882
0.886287	0.857794	LP	Herm	DLW192	2022_01_10_DLW192_gfpsyp2_herm_01_Statistics	39.45	spo-11	SYP2GFP	7741270	196230
0.912014	0.889967	LP	Herm	DLW192	2022_01_10_DLW192_gfpsyp2_herm_01_Statistics	50.03	spo-11	SYP2GFP	10757800	215027
0.808211	0.760154	LP	Herm	DLW192	2022_01_10_DLW192_gfpsyp2_herm_01_Statistics	48.86	spo-11	SYP2GFP	10968700	224492
0.939312	0.924105	LP	Herm	DLW192	2022_01_10_DLW192_gfpsyp2_herm_01_Statistics	46.62	spo-11	SYP2GFP	9935110	213108
[truncated: 9,901 more rows]
