# Supplementary material for: Sexual dimorphic regulation of recombination by the synaptonemal complex in C. elegans
Source: eLife. 2023 Oct 5;12:e84538. doi: 10.7554/eLife.84538 (PMC10611432; doi:10.7554/eLife.84538)
Supplement: Figure 4—source data 1. [file elife-84538-fig4-data1.xlsx]

## Sheet: Sheet1
Explanation of the column identifiers: (1) Length shows the length between individual measured segments; (2) cum_length is the progressive cumulative length of the segments in one germline; (3) SYP1 identifies each category of SYP-1 assembly: short linear stretches (SYP1assembly), mostly assembled with some discontinuities (SYP1partial), and fully assembled (SYP1); (4) length_normd is the normali…
length	cum_length	SYP1_stain	length_normd	Sex	Genotype	image_name
44.9534	44.9534	None	0.120811	herm	WT	2022_07_31_NSV129_555syp1_488gfpmsh5_dapi_herm1_stitched
14.1407	59.0941	SYP1assembly	0.158814	herm	WT	2022_07_31_NSV129_555syp1_488gfpmsh5_dapi_herm1_stitched
14.3956	73.4897	SYP1assembly	0.197501	herm	WT	2022_07_31_NSV129_555syp1_488gfpmsh5_dapi_herm1_stitched
10.2773	83.7669	SYP1assembly	0.225121	herm	WT	2022_07_31_NSV129_555syp1_488gfpmsh5_dapi_herm1_stitched
13.145	96.9119	SYP1assembly	0.260448	herm	WT	2022_07_31_NSV129_555syp1_488gfpmsh5_dapi_herm1_stitched
14.7713	111.683	SYPpartial	0.300145	herm	WT	2022_07_31_NSV129_555syp1_488gfpmsh5_dapi_herm1_stitched
109.426	221.109	SYP1	0.594223	herm	WT	2022_07_31_NSV129_555syp1_488gfpmsh5_dapi_herm1_stitched
61.0343	282.143	SYP1	0.758251	herm	WT	2022_07_31_NSV129_555syp1_488gfpmsh5_dapi_herm1_stitched
89.9541	372.097	SYP1	1	herm	WT	2022_07_31_NSV129_555syp1_488gfpmsh5_dapi_herm1_stitched
18.8854	18.8854	None	0.0556416	herm	WT	2022_07_31_NSV129_555syp1_488gfpmsh5_dapi_herm2_stitched
12.8116	31.6969	None	0.093388	herm	WT	2022_07_31_NSV129_555syp1_488gfpmsh5_dapi_herm2_stitched
8.53073	40.2277	None	0.118522	herm	WT	2022_07_31_NSV129_555syp1_488gfpmsh5_dapi_herm2_stitched
7.00391	47.2316	None	0.139157	herm	WT	2022_07_31_NSV129_555syp1_488gfpmsh5_dapi_herm2_stitched
19.2523	66.4839	None	0.19588	herm	WT	2022_07_31_NSV129_555syp1_488gfpmsh5_dapi_herm2_stitched
10.0199	76.5038	None	0.225401	herm	WT	2022_07_31_NSV129_555syp1_488gfpmsh5_dapi_herm2_stitched
16.7539	93.2577	SYP1assembly	0.274763	herm	WT	2022_07_31_NSV129_555syp1_488gfpmsh5_dapi_herm2_stitched
18.5953	111.853	SYP1assembly	0.32955	herm	WT	2022_07_31_NSV129_555syp1_488gfpmsh5_dapi_herm2_stitched
24.9205	136.773	SYP1assembly	0.402973	herm	WT	2022_07_31_NSV129_555syp1_488gfpmsh5_dapi_herm2_stitched
17.6311	154.405	SYPpartial	0.454919	herm	WT	2022_07_31_NSV129_555syp1_488gfpmsh5_dapi_herm2_stitched
55.2992	209.704	SYP1	0.617846	herm	WT	2022_07_31_NSV129_555syp1_488gfpmsh5_dapi_herm2_stitched
54.7831	264.487	SYP1	0.779252	herm	WT	2022_07_31_NSV129_555syp1_488gfpmsh5_dapi_herm2_stitched
74.9242	339.411	SYP1	1	herm	WT	2022_07_31_NSV129_555syp1_488gfpmsh5_dapi_herm2_stitched
46.2251	46.2251	None	0.13319	herm	WT	2022_07_31_NSV129_555syp1_488gfpmsh5_dapi_herm3_stitched
33.0727	79.2978	SYP1assembly	0.228483	herm	WT	2022_07_31_NSV129_555syp1_488gfpmsh5_dapi_herm3_stitched
13.4941	92.7919	SYP1assembly	0.267364	herm	WT	2022_07_31_NSV129_555syp1_488gfpmsh5_dapi_herm3_stitched
14.6828	107.475	SYP1assembly	0.30967	herm	WT	2022_07_31_NSV129_555syp1_488gfpmsh5_dapi_herm3_stitched
8.84439	116.319	SYPpartial	0.335153	herm	WT	2022_07_31_NSV129_555syp1_488gfpmsh5_dapi_herm3_stitched
63.7747	180.094	SYP1	0.518909	herm	WT	2022_07_31_NSV129_555syp1_488gfpmsh5_dapi_herm3_stitched
26.264	206.358	SYP1	0.594584	herm	WT	2022_07_31_NSV129_555syp1_488gfpmsh5_dapi_herm3_stitched
25.9189	232.277	SYP1	0.669264	herm	WT	2022_07_31_NSV129_555syp1_488gfpmsh5_dapi_herm3_stitched
44.3261	276.603	SYP1	0.796982	herm	WT	2022_07_31_NSV129_555syp1_488gfpmsh5_dapi_herm3_stitched
70.4598	347.063	SYP1	1	herm	WT	2022_07_31_NSV129_555syp1_488gfpmsh5_dapi_herm3_stitched
27.074	27.074	None	0.0638877	herm	WT	2022_07_31_NSV129_555syp1_488gfpmsh5_dapi_herm4_stitched
24.387	51.4611	None	0.121435	herm	WT	2022_07_31_NSV129_555syp1_488gfpmsh5_dapi_herm4_stitched
44.1244	95.5855	SYP1assembly	0.225557	herm	WT	2022_07_31_NSV129_555syp1_488gfpmsh5_dapi_herm4_stitched
13.8394	109.425	SYP1assembly	0.258214	herm	WT	2022_07_31_NSV129_555syp1_488gfpmsh5_dapi_herm4_stitched
54.5623	163.987	SYP1assembly	0.386967	herm	WT	2022_07_31_NSV129_555syp1_488gfpmsh5_dapi_herm4_stitched
7.79574	171.783	SYPpartial	0.405363	herm	WT	2022_07_31_NSV129_555syp1_488gfpmsh5_dapi_herm4_stitched
56.4364	228.219	SYP1	0.538538	herm	WT	2022_07_31_NSV129_555syp1_488gfpmsh5_dapi_herm4_stitched
32.3524	260.572	SYP1	0.614881	herm	WT	2022_07_31_NSV129_555syp1_488gfpmsh5_dapi_herm4_stitched
75.5345	336.106	SYP1	0.793123	herm	WT	2022_07_31_NSV129_555syp1_488gfpmsh5_dapi_herm4_stitched
87.6697	423.776	SYP1	1	herm	WT	2022_07_31_NSV129_555syp1_488gfpmsh5_dapi_herm4_stitched
41.2177	41.2177	None	0.112381	male	WT	2022_07_31_NSV129_555syp1_488gfpmsh5_dapi_male2_stitched
24.3402	65.5579	None	0.178745	male	WT	2022_07_31_NSV129_555syp1_488gfpmsh5_dapi_male2_stitched
27.8031	93.361	SYP1assembly	0.254551	male	WT	2022_07_31_NSV129_555syp1_488gfpmsh5_dapi_male2_stitched
28.3593	121.72	SYP1assembly	0.331873	male	WT	2022_07_31_NSV129_555syp1_488gfpmsh5_dapi_male2_stitched
12.5457	134.266	SYP1assembly	0.366079	male	WT	2022_07_31_NSV129_555syp1_488gfpmsh5_dapi_male2_stitched
23.6241	157.89	SYP1assembly	0.430491	male	WT	2022_07_31_NSV129_555syp1_488gfpmsh5_dapi_male2_stitched
5.31371	163.204	SYP1assembly	0.444979	male	WT	2022_07_31_NSV129_555syp1_488gfpmsh5_dapi_male2_stitched
6.8658	170.07	SYPpartial	0.463698	male	WT	2022_07_31_NSV129_555syp1_488gfpmsh5_dapi_male2_stitched
26.1214	196.191	SYP1	0.534919	male	WT	2022_07_31_NSV129_555syp1_488gfpmsh5_dapi_male2_stitched
38.8658	235.057	SYP1	0.640887	male	WT	2022_07_31_NSV129_555syp1_488gfpmsh5_dapi_male2_stitched
25.522	260.579	SYP1	0.710474	male	WT	2022_07_31_NSV129_555syp1_488gfpmsh5_dapi_male2_stitched
26.7475	287.326	SYP1	0.783401	male	WT	2022_07_31_NSV129_555syp1_488gfpmsh5_dapi_male2_stitched
32.577	319.903	SYP1	0.872223	male	WT	2022_07_31_NSV129_555syp1_488gfpmsh5_dapi_male2_stitched
26.9292	346.833	SYP1	0.945646	male	WT	2022_07_31_NSV129_555syp1_488gfpmsh5_dapi_male2_stitched
19.9351	366.768	SYP1	1	male	WT	2022_07_31_NSV129_555syp1_488gfpmsh5_dapi_male2_stitched
26.0108	26.0108	None	0.0684322	male	WT	2022_07_31_NSV129_555syp1_488gfpmsh5_dapi_male4_stitched
43.2927	69.3035	None	0.182332	male	WT	2022_07_31_NSV129_555syp1_488gfpmsh5_dapi_male4_stitched
20.6131	89.9165	SYP1assembly	0.236563	male	WT	2022_07_31_NSV129_555syp1_488gfpmsh5_dapi_male4_stitched
20.7242	110.641	SYP1assembly	0.291087	male	WT	2022_07_31_NSV129_555syp1_488gfpmsh5_dapi_male4_stitched
17.0453	127.686	SYP1assembly	0.335931	male	WT	2022_07_31_NSV129_555syp1_488gfpmsh5_dapi_male4_stitched
17.8949	145.581	SYP1assembly	0.383011	male	WT	2022_07_31_NSV129_555syp1_488gfpmsh5_dapi_male4_stitched
19.4436	165.024	SYP1assembly	0.434166	male	WT	2022_07_31_NSV129_555syp1_488gfpmsh5_dapi_male4_stitched
13.8242	178.849	SYPpartial	0.470536	male	WT	2022_07_31_NSV129_555syp1_488gfpmsh5_dapi_male4_stitched
24.674	203.523	SYP1	0.535451	male	WT	2022_07_31_NSV129_555syp1_488gfpmsh5_dapi_male4_stitched
31.886	235.409	SYP1	0.619341	male	WT	2022_07_31_NSV129_555syp1_488gfpmsh5_dapi_male4_stitched
35.6509	271.06	SYP1	0.713135	male	WT	2022_07_31_NSV129_555syp1_488gfpmsh5_dapi_male4_stitched
23.3229	294.382	SYP1	0.774496	male	WT	2022_07_31_NSV129_555syp1_488gfpmsh5_dapi_male4_stitched
32.0835	326.466	SYP1	0.858905	male	WT	2022_07_31_NSV129_555syp1_488gfpmsh5_dapi_male4_stitched
53.6296	380.095	SYP1	1	male	WT	2022_07_31_NSV129_555syp1_488gfpmsh5_dapi_male4_stitched
41.0651	41.0651	None	0.12149	male	WT	2022_07_31_NSV129_555syp1_488gfpmsh5_dapi_male6_stitched
24.8913	65.9564	None	0.195131	male	WT	2022_07_31_NSV129_555syp1_488gfpmsh5_dapi_male6_stitched
39.0787	105.035	SYP1assembly	0.310744	male	WT	2022_07_31_NSV129_555syp1_488gfpmsh5_dapi_male6_stitched
24.8226	129.858	SYP1assembly	0.384181	male	WT	2022_07_31_NSV129_555syp1_488gfpmsh5_dapi_male6_stitched
24.2768	154.135	SYP1assembly	0.456004	male	WT	2022_07_31_NSV129_555syp1_488gfpmsh5_dapi_male6_stitched
8.73837	162.873	SYPpartial	0.481856	male	WT	2022_07_31_NSV129_555syp1_488gfpmsh5_dapi_male6_stitched
11.0135	173.887	SYP1	0.514439	male	WT	2022_07_31_NSV129_555syp1_488gfpmsh5_dapi_male6_stitched
16.5707	190.457	SYP1	0.563463	male	WT	2022_07_31_NSV129_555syp1_488gfpmsh5_dapi_male6_stitched
33.9891	224.446	SYP1	0.664019	male	WT	2022_07_31_NSV129_555syp1_488gfpmsh5_dapi_male6_stitched
25.1245	249.571	SYP1	0.738349	male	WT	2022_07_31_NSV129_555syp1_488gfpmsh5_dapi_male6_stitched
24.8314	274.402	SYP1	0.811813	male	WT	2022_07_31_NSV129_555syp1_488gfpmsh5_dapi_male6_stitched
31.1671	305.569	SYP1	0.90402	male	WT	2022_07_31_NSV129_555syp1_488gfpmsh5_dapi_male6_stitched
32.4425	338.012	SYP1	1	male	WT	2022_07_31_NSV129_555syp1_488gfpmsh5_dapi_male6_stitched
37.2199	37.2199	None	0.123058	male	WT	2022_07_31_NSV129_555syp1_488gfpmsh5_dapi_male8_stitched
22.4749	59.6948	None	0.197365	male	WT	2022_07_31_NSV129_555syp1_488gfpmsh5_dapi_male8_stitched
17.2088	76.9035	SYP1assembly	0.254261	male	WT	2022_07_31_NSV129_555syp1_488gfpmsh5_dapi_male8_stitched
22.9656	99.8691	SYP1assembly	0.330191	male	WT	2022_07_31_NSV129_555syp1_488gfpmsh5_dapi_male8_stitched
11.6822	111.551	SYP1assembly	0.368815	male	WT	2022_07_31_NSV129_555syp1_488gfpmsh5_dapi_male8_stitched
17.5242	129.076	SYP1assembly	0.426754	male	WT	2022_07_31_NSV129_555syp1_488gfpmsh5_dapi_male8_stitched
19.6532	148.729	SYPpartial	0.491732	male	WT	2022_07_31_NSV129_555syp1_488gfpmsh5_dapi_male8_stitched
15.0461	163.775	SYP1	0.541478	male	WT	2022_07_31_NSV129_555syp1_488gfpmsh5_dapi_male8_stitched
13.2932	177.068	SYP1	0.585429	male	WT	2022_07_31_NSV129_555syp1_488gfpmsh5_dapi_male8_stitched
7.72614	184.794	SYP1	0.610973	male	WT	2022_07_31_NSV129_555syp1_488gfpmsh5_dapi_male8_stitched
11.1363	195.931	SYP1	0.647792	male	WT	2022_07_31_NSV129_555syp1_488gfpmsh5_dapi_male8_stitched
8.23416	204.165	SYP1	0.675016	male	WT	2022_07_31_NSV129_555syp1_488gfpmsh5_dapi_male8_stitched
22.5631	226.728	SYP1	0.749615	male	WT	2022_07_31_NSV129_555syp1_488gfpmsh5_dapi_male8_stitched
23.0577	249.785	SYP1	0.825849	male	WT	2022_07_31_NSV129_555syp1_488gfpmsh5_dapi_male8_stitched
52.6734	302.459	SYP1	1	male	WT	2022_07_31_NSV129_555syp1_488gfpmsh5_dapi_male8_stitched
31.8235	31.8235	None	0.096387	male	WT	2022_07_31_NSV129_555syp1_488gfpmsh5_dapi_male9_stitched
11.735	43.5585	SYP1assembly	0.13193	male	WT	2022_07_31_NSV129_555syp1_488gfpmsh5_dapi_male9_stitched
11.4193	54.9778	SYP1assembly	0.166516	male	WT	2022_07_31_NSV129_555syp1_488gfpmsh5_dapi_male9_stitched
43.3472	98.325	SYP1assembly	0.297806	male	WT	2022_07_31_NSV129_555syp1_488gfpmsh5_dapi_male9_stitched
7.3646	105.69	SYP1assembly	0.320112	male	WT	2022_07_31_NSV129_555syp1_488gfpmsh5_dapi_male9_stitched
26.2341	131.924	SYP1assembly	0.39957	male	WT	2022_07_31_NSV129_555syp1_488gfpmsh5_dapi_male9_stitched
11.4408	143.364	SYPpartial	0.434222	male	WT	2022_07_31_NSV129_555syp1_488gfpmsh5_dapi_male9_stitched
20.34	163.705	SYP1	0.495827	male	WT	2022_07_31_NSV129_555syp1_488gfpmsh5_dapi_male9_stitched
23.3626	187.067	SYP1	0.566588	male	WT	2022_07_31_NSV129_555syp1_488gfpmsh5_dapi_male9_stitched
13.6718	200.739	SYP1	0.607997	male	WT	2022_07_31_NSV129_555syp1_488gfpmsh5_dapi_male9_stitched
6.23182	206.971	SYP1	0.626872	male	WT	2022_07_31_NSV129_555syp1_488gfpmsh5_dapi_male9_stitched
10.7359	217.707	SYP1	0.659389	male	WT	2022_07_31_NSV129_555syp1_488gfpmsh5_dapi_male9_stitched
14.6729	232.38	SYP1	0.70383	male	WT	2022_07_31_NSV129_555syp1_488gfpmsh5_dapi_male9_stitched
27.5238	259.903	SYP1	0.787194	male	WT	2022_07_31_NSV129_555syp1_488gfpmsh5_dapi_male9_stitched
18.4509	278.354	SYP1	0.843078	male	WT	2022_07_31_NSV129_555syp1_488gfpmsh5_dapi_male9_stitched
51.8101	330.164	SYP1	1	male	WT	2022_07_31_NSV129_555syp1_488gfpmsh5_dapi_male9_stitched
53.4881	53.4881	None	0.158382	herm	syp2het	2022_08_01_DLW208het_555syp1_488gfpmsh5_dapi_herm2_stitched
20.8675	74.3556	SYP1assembly	0.220172	herm	syp2het	2022_08_01_DLW208het_555syp1_488gfpmsh5_dapi_herm2_stitched
20.8286	95.1841	SYP1assembly	0.281847	herm	syp2het	2022_08_01_DLW208het_555syp1_488gfpmsh5_dapi_herm2_stitched
14.977	110.161	SYP1assembly	0.326195	herm	syp2het	2022_08_01_DLW208het_555syp1_488gfpmsh5_dapi_herm2_stitched
37.2132	147.374	SYP1assembly	0.436386	herm	syp2het	2022_08_01_DLW208het_555syp1_488gfpmsh5_dapi_herm2_stitched
22.4509	169.825	SYP1assembly	0.502864	herm	syp2het	2022_08_01_DLW208het_555syp1_488gfpmsh5_dapi_herm2_stitched
41.9441	211.769	SYPpartial	0.627064	herm	syp2het	2022_08_01_DLW208het_555syp1_488gfpmsh5_dapi_herm2_stitched
51.6267	263.396	SYP1	0.779934	herm	syp2het	2022_08_01_DLW208het_555syp1_488gfpmsh5_dapi_herm2_stitched
38.8243	302.22	SYP1	0.894896	herm	syp2het	2022_08_01_DLW208het_555syp1_488gfpmsh5_dapi_herm2_stitched
35.4954	337.716	SYP1	1	herm	syp2het	2022_08_01_DLW208het_555syp1_488gfpmsh5_dapi_herm2_stitched
16.5485	16.5485	None	0.0525365	herm	syp2het	2022_08_01_DLW208het_555syp1_488gfpmsh5_dapi_herm3_stitched
47.668	64.2165	None	0.203868	herm	syp2het	2022_08_01_DLW208het_555syp1_488gfpmsh5_dapi_herm3_stitched
15.2687	79.4852	SYP1assembly	0.252342	herm	syp2het	2022_08_01_DLW208het_555syp1_488gfpmsh5_dapi_herm3_stitched
14.9564	94.4416	SYP1assembly	0.299824	herm	syp2het	2022_08_01_DLW208het_555syp1_488gfpmsh5_dapi_herm3_stitched
54.4032	148.845	SYP1assembly	0.472538	herm	syp2het	2022_08_01_DLW208het_555syp1_488gfpmsh5_dapi_herm3_stitched
30.2657	179.111	SYPpartial	0.568623	herm	syp2het	2022_08_01_DLW208het_555syp1_488gfpmsh5_dapi_herm3_stitched
31.273	210.383	SYPpartial	0.667906	herm	syp2het	2022_08_01_DLW208het_555syp1_488gfpmsh5_dapi_herm3_stitched
48.4118	258.795	SYP1	0.821599	herm	syp2het	2022_08_01_DLW208het_555syp1_488gfpmsh5_dapi_herm3_stitched
56.1946	314.99	SYP1	1	herm	syp2het	2022_08_01_DLW208het_555syp1_488gfpmsh5_dapi_herm3_stitched
55.4987	55.4987	None	0.139007	herm	syp2het	2022_08_01_DLW208het_555syp1_488gfpmsh5_dapi_herm4_stitched
14.4832	69.9819	SYP1assembly	0.175283	herm	syp2het	2022_08_01_DLW208het_555syp1_488gfpmsh5_dapi_herm4_stitched
9.20922	79.1911	SYP1assembly	0.198349	herm	syp2het	2022_08_01_DLW208het_555syp1_488gfpmsh5_dapi_herm4_stitched
27.5217	106.713	SYP1assembly	0.267282	herm	syp2het	2022_08_01_DLW208het_555syp1_488gfpmsh5_dapi_herm4_stitched
25.9006	132.613	SYP1assembly	0.332155	herm	syp2het	2022_08_01_DLW208het_555syp1_488gfpmsh5_dapi_herm4_stitched
27.9219	160.535	SYP1assembly	0.402091	herm	syp2het	2022_08_01_DLW208het_555syp1_488gfpmsh5_dapi_herm4_stitched
32.6253	193.161	SYPpartial	0.483807	herm	syp2het	2022_08_01_DLW208het_555syp1_488gfpmsh5_dapi_herm4_stitched
45.0972	238.258	SYP1	0.596762	herm	syp2het	2022_08_01_DLW208het_555syp1_488gfpmsh5_dapi_herm4_stitched
61.9058	300.164	SYP1	0.751817	herm	syp2het	2022_08_01_DLW208het_555syp1_488gfpmsh5_dapi_herm4_stitched
39.5222	339.686	SYP1	0.850807	herm	syp2het	2022_08_01_DLW208het_555syp1_488gfpmsh5_dapi_herm4_stitched
59.5654	399.251	SYP1	1	herm	syp2het	2022_08_01_DLW208het_555syp1_488gfpmsh5_dapi_herm4_stitched
42.4748	42.4748	None	0.130322	herm	syp2het	2022_08_01_DLW208het_555syp1_488gfpmsh5_dapi_herm5_stitched
21.6049	64.0796	None	0.19661	herm	syp2het	2022_08_01_DLW208het_555syp1_488gfpmsh5_dapi_herm5_stitched
11.4772	75.5568	SYP1assembly	0.231824	herm	syp2het	2022_08_01_DLW208het_555syp1_488gfpmsh5_dapi_herm5_stitched
7.48554	83.0423	SYP1assembly	0.254791	herm	syp2het	2022_08_01_DLW208het_555syp1_488gfpmsh5_dapi_herm5_stitched
13.5487	96.591	SYP1assembly	0.296362	herm	syp2het	2022_08_01_DLW208het_555syp1_488gfpmsh5_dapi_herm5_stitched
25.9617	122.553	SYP1assembly	0.376018	herm	syp2het	2022_08_01_DLW208het_555syp1_488gfpmsh5_dapi_herm5_stitched
34.7726	157.325	SYPpartial	0.482707	herm	syp2het	2022_08_01_DLW208het_555syp1_488gfpmsh5_dapi_herm5_stitched
37.3425	194.668	SYP1	0.597282	herm	syp2het	2022_08_01_DLW208het_555syp1_488gfpmsh5_dapi_herm5_stitched
30.2444	224.912	SYP1	0.690078	herm	syp2het	2022_08_01_DLW208het_555syp1_488gfpmsh5_dapi_herm5_stitched
35.6309	260.543	SYP1	0.799401	herm	syp2het	2022_08_01_DLW208het_555syp1_488gfpmsh5_dapi_herm5_stitched
13.2924	273.836	SYP1	0.840185	herm	syp2het	2022_08_01_DLW208het_555syp1_488gfpmsh5_dapi_herm5_stitched
52.0872	325.923	SYP1	1	herm	syp2het	2022_08_01_DLW208het_555syp1_488gfpmsh5_dapi_herm5_stitched
41.0235	41.0235	None	0.126489	male	syp2het	2022_08_01_DLW208het_555syp1_488gfpmsh5_dapi_male1_stitched
32.8588	73.8823	None	0.227804	male	syp2het	2022_08_01_DLW208het_555syp1_488gfpmsh5_dapi_male1_stitched
17.3537	91.236	None	0.281312	male	syp2het	2022_08_01_DLW208het_555syp1_488gfpmsh5_dapi_male1_stitched
16.0439	107.28	None	0.33078	male	syp2het	2022_08_01_DLW208het_555syp1_488gfpmsh5_dapi_male1_stitched
4.3983	111.678	None	0.344342	male	syp2het	2022_08_01_DLW208het_555syp1_488gfpmsh5_dapi_male1_stitched
17.7877	129.466	SYP1assembly	0.399187	male	syp2het	2022_08_01_DLW208het_555syp1_488gfpmsh5_dapi_male1_stitched
3.87636	133.342	SYP1assembly	0.411139	male	syp2het	2022_08_01_DLW208het_555syp1_488gfpmsh5_dapi_male1_stitched
31.7127	165.055	SYP1assembly	0.50892	male	syp2het	2022_08_01_DLW208het_555syp1_488gfpmsh5_dapi_male1_stitched
8.79707	173.852	SYPpartial	0.536045	male	syp2het	2022_08_01_DLW208het_555syp1_488gfpmsh5_dapi_male1_stitched
9.38116	183.233	SYP1	0.56497	male	syp2het	2022_08_01_DLW208het_555syp1_488gfpmsh5_dapi_male1_stitched
10.179	193.412	SYP1	0.596355	male	syp2het	2022_08_01_DLW208het_555syp1_488gfpmsh5_dapi_male1_stitched
11.8365	205.249	SYP1	0.632851	male	syp2het	2022_08_01_DLW208het_555syp1_488gfpmsh5_dapi_male1_stitched
19.3916	224.64	SYP1	0.692642	male	syp2het	2022_08_01_DLW208het_555syp1_488gfpmsh5_dapi_male1_stitched
16.7919	241.432	SYP1	0.744417	male	syp2het	2022_08_01_DLW208het_555syp1_488gfpmsh5_dapi_male1_stitched
21.843	263.275	SYP1	0.811767	male	syp2het	2022_08_01_DLW208het_555syp1_488gfpmsh5_dapi_male1_stitched
26.5622	289.837	SYP1	0.893667	male	syp2het	2022_08_01_DLW208het_555syp1_488gfpmsh5_dapi_male1_stitched
34.4864	324.324	SYP1	1	male	syp2het	2022_08_01_DLW208het_555syp1_488gfpmsh5_dapi_male1_stitched
35.2914	35.2914	None	0.120797	male	syp2het	2022_08_01_DLW208het_555syp1_488gfpmsh5_dapi_male3_stitched
10.7401	46.0315	None	0.157559	male	syp2het	2022_08_01_DLW208het_555syp1_488gfpmsh5_dapi_male3_stitched
21.1081	67.1395	SYP1assembly	0.229809	male	syp2het	2022_08_01_DLW208het_555syp1_488gfpmsh5_dapi_male3_stitched
14.0098	81.1494	SYP1assembly	0.277762	male	syp2het	2022_08_01_DLW208het_555syp1_488gfpmsh5_dapi_male3_stitched
10.0178	91.1671	SYP1assembly	0.312051	male	syp2het	2022_08_01_DLW208het_555syp1_488gfpmsh5_dapi_male3_stitched
13.1991	104.366	SYP1assembly	0.35723	male	syp2het	2022_08_01_DLW208het_555syp1_488gfpmsh5_dapi_male3_stitched
12.722	117.088	SYP1assembly	0.400775	male	syp2het	2022_08_01_DLW208het_555syp1_488gfpmsh5_dapi_male3_stitched
15.1178	132.206	SYPpartial	0.452521	male	syp2het	2022_08_01_DLW208het_555syp1_488gfpmsh5_dapi_male3_stitched
9.8139	142.02	SYP1	0.486113	male	syp2het	2022_08_01_DLW208het_555syp1_488gfpmsh5_dapi_male3_stitched
19.1203	161.14	SYP1	0.551559	male	syp2het	2022_08_01_DLW208het_555syp1_488gfpmsh5_dapi_male3_stitched
19.1533	180.293	SYP1	0.617118	male	syp2het	2022_08_01_DLW208het_555syp1_488gfpmsh5_dapi_male3_stitched
11.0864	191.38	SYP1	0.655065	male	syp2het	2022_08_01_DLW208het_555syp1_488gfpmsh5_dapi_male3_stitched
27.1777	218.558	SYP1	0.74809	male	syp2het	2022_08_01_DLW208het_555syp1_488gfpmsh5_dapi_male3_stitched
34.1872	252.745	SYP1	0.865107	male	syp2het	2022_08_01_DLW208het_555syp1_488gfpmsh5_dapi_male3_stitched
39.4094	292.154	SYP1	1	male	syp2het	2022_08_01_DLW208het_555syp1_488gfpmsh5_dapi_male3_stitched
26.0681	26.0681	None	0.0524606	male	syp2het	2022_08_01_DLW208het_555syp1_488gfpmsh5_dapi_male4_stitched
24.2438	50.3119	None	0.10125	male	syp2het	2022_08_01_DLW208het_555syp1_488gfpmsh5_dapi_male4_stitched
16.8488	67.1607	None	0.135157	male	syp2het	2022_08_01_DLW208het_555syp1_488gfpmsh5_dapi_male4_stitched
16.7705	83.9312	None	0.168907	male	syp2het	2022_08_01_DLW208het_555syp1_488gfpmsh5_dapi_male4_stitched
19.9127	103.844	None	0.20898	male	syp2het	2022_08_01_DLW208het_555syp1_488gfpmsh5_dapi_male4_stitched
24.5961	128.44	None	0.258478	male	syp2het	2022_08_01_DLW208het_555syp1_488gfpmsh5_dapi_male4_stitched
13.2806	141.721	SYP1assembly	0.285205	male	syp2het	2022_08_01_DLW208het_555syp1_488gfpmsh5_dapi_male4_stitched
15.2609	156.982	SYP1assembly	0.315917	male	syp2het	2022_08_01_DLW208het_555syp1_488gfpmsh5_dapi_male4_stitched
12.033	169.015	SYP1assembly	0.340132	male	syp2het	2022_08_01_DLW208het_555syp1_488gfpmsh5_dapi_male4_stitched
20.6446	189.659	SYP1assembly	0.381679	male	syp2het	2022_08_01_DLW208het_555syp1_488gfpmsh5_dapi_male4_stitched
20.8056	210.465	SYP1assembly	0.423549	male	syp2het	2022_08_01_DLW208het_555syp1_488gfpmsh5_dapi_male4_stitched
16.219	226.684	SYP1assembly	0.456189	male	syp2het	2022_08_01_DLW208het_555syp1_488gfpmsh5_dapi_male4_stitched
23.1408	249.825	SYPpartial	0.502758	male	syp2het	2022_08_01_DLW208het_555syp1_488gfpmsh5_dapi_male4_stitched
26.5142	276.339	SYP1	0.556117	male	syp2het	2022_08_01_DLW208het_555syp1_488gfpmsh5_dapi_male4_stitched
39.2911	315.63	SYP1	0.635188	male	syp2het	2022_08_01_DLW208het_555syp1_488gfpmsh5_dapi_male4_stitched
41.5185	357.148	SYP1	0.718741	male	syp2het	2022_08_01_DLW208het_555syp1_488gfpmsh5_dapi_male4_stitched
53.1494	410.298	SYP1	0.825702	male	syp2het	2022_08_01_DLW208het_555syp1_488gfpmsh5_dapi_male4_stitched
86.6103	496.908	SYP1	1	male	syp2het	2022_08_01_DLW208het_555syp1_488gfpmsh5_dapi_male4_stitched
39.2993	39.2993	None	0.133527	herm	syp3het	2022_08_01_DLW209het_555syp1_488gfpmsh5_dapi_herm2_stitched
10.6686	49.9679	SYP1assembly	0.169775	herm	syp3het	2022_08_01_DLW209het_555syp1_488gfpmsh5_dapi_herm2_stitched
12.5088	62.4768	SYP1assembly	0.212276	herm	syp3het	2022_08_01_DLW209het_555syp1_488gfpmsh5_dapi_herm2_stitched
27.9028	90.3795	SYP1assembly	0.307081	herm	syp3het	2022_08_01_DLW209het_555syp1_488gfpmsh5_dapi_herm2_stitched
9.65003	100.03	SYPpartial	0.339869	herm	syp3het	2022_08_01_DLW209het_555syp1_488gfpmsh5_dapi_herm2_stitched
25.8673	125.897	SYP1	0.427758	herm	syp3het	2022_08_01_DLW209het_555syp1_488gfpmsh5_dapi_herm2_stitched
45.6306	171.527	SYP1	0.582796	herm	syp3het	2022_08_01_DLW209het_555syp1_488gfpmsh5_dapi_herm2_stitched
41.4698	212.997	SYP1	0.723697	herm	syp3het	2022_08_01_DLW209het_555syp1_488gfpmsh5_dapi_herm2_stitched
27.3816	240.379	SYP1	0.816731	herm	syp3het	2022_08_01_DLW209het_555syp1_488gfpmsh5_dapi_herm2_stitched
20.736	261.115	SYP1	0.887186	herm	syp3het	2022_08_01_DLW209het_555syp1_488gfpmsh5_dapi_herm2_stitched
33.2033	294.318	SYP1	1	herm	syp3het	2022_08_01_DLW209het_555syp1_488gfpmsh5_dapi_herm2_stitched
42.5361	42.5361	None	0.119052	herm	syp3het	2022_08_01_DLW209het_555syp1_488gfpmsh5_dapi_herm3_stitched
21.2486	63.7847	None	0.178523	herm	syp3het	2022_08_01_DLW209het_555syp1_488gfpmsh5_dapi_herm3_stitched
15.4989	79.2836	SYP1assembly	0.221903	herm	syp3het	2022_08_01_DLW209het_555syp1_488gfpmsh5_dapi_herm3_stitched
22.0278	101.311	SYP1assembly	0.283555	herm	syp3het	2022_08_01_DLW209het_555syp1_488gfpmsh5_dapi_herm3_stitched
16.1397	117.451	SYP1assembly	0.328727	herm	syp3het	2022_08_01_DLW209het_555syp1_488gfpmsh5_dapi_herm3_stitched
27.168	144.619	SYP1assembly	0.404767	herm	syp3het	2022_08_01_DLW209het_555syp1_488gfpmsh5_dapi_herm3_stitched
19.161	163.78	SYPpartial	0.458395	herm	syp3het	2022_08_01_DLW209het_555syp1_488gfpmsh5_dapi_herm3_stitched
61.9816	225.762	SYP1	0.631872	herm	syp3het	2022_08_01_DLW209het_555syp1_488gfpmsh5_dapi_herm3_stitched
49.8476	275.609	SYP1	0.771388	herm	syp3het	2022_08_01_DLW209het_555syp1_488gfpmsh5_dapi_herm3_stitched
81.6808	357.29	SYP1	1	herm	syp3het	2022_08_01_DLW209het_555syp1_488gfpmsh5_dapi_herm3_stitched
31.9589	31.9589	None	0.0809066	herm	syp3het	2022_08_01_DLW209het_555syp1_488gfpmsh5_dapi_herm4_stitched
33.2073	65.1661	None	0.164973	herm	syp3het	2022_08_01_DLW209het_555syp1_488gfpmsh5_dapi_herm4_stitched
26.1516	91.3178	None	0.231178	herm	syp3het	2022_08_01_DLW209het_555syp1_488gfpmsh5_dapi_herm4_stitched
14.4203	105.738	SYP1assembly	0.267685	herm	syp3het	2022_08_01_DLW209het_555syp1_488gfpmsh5_dapi_herm4_stitched
25.68	131.418	SYP1assembly	0.332696	herm	syp3het	2022_08_01_DLW209het_555syp1_488gfpmsh5_dapi_herm4_stitched
19.68	151.098	SYP1assembly	0.382517	herm	syp3het	2022_08_01_DLW209het_555syp1_488gfpmsh5_dapi_herm4_stitched
15.8467	166.945	SYP1assembly	0.422634	herm	syp3het	2022_08_01_DLW209het_555syp1_488gfpmsh5_dapi_herm4_stitched
13.3272	180.272	SYPpartial	0.456373	herm	syp3het	2022_08_01_DLW209het_555syp1_488gfpmsh5_dapi_herm4_stitched
22.9096	203.182	SYP1	0.514371	herm	syp3het	2022_08_01_DLW209het_555syp1_488gfpmsh5_dapi_herm4_stitched
22.5916	225.773	SYP1	0.571563	herm	syp3het	2022_08_01_DLW209het_555syp1_488gfpmsh5_dapi_herm4_stitched
40.635	266.408	SYP1	0.674434	herm	syp3het	2022_08_01_DLW209het_555syp1_488gfpmsh5_dapi_herm4_stitched
41.6455	308.054	SYP1	0.779863	herm	syp3het	2022_08_01_DLW209het_555syp1_488gfpmsh5_dapi_herm4_stitched
20.8824	328.936	SYP1	0.832729	herm	syp3het	2022_08_01_DLW209het_555syp1_488gfpmsh5_dapi_herm4_stitched
14.024	342.96	SYP1	0.868232	herm	syp3het	2022_08_01_DLW209het_555syp1_488gfpmsh5_dapi_herm4_stitched
15.1607	358.121	SYP1	0.906612	herm	syp3het	2022_08_01_DLW209het_555syp1_488gfpmsh5_dapi_herm4_stitched
36.8891	395.01	SYP1	1	herm	syp3het	2022_08_01_DLW209het_555syp1_488gfpmsh5_dapi_herm4_stitched
35.5288	35.5288	None	0.102478	male	syp3het	2022_08_01_DLW209het_555syp1_488gfpmsh5_dapi_male1_stitched
35.6575	71.1864	None	0.205327	male	syp3het	2022_08_01_DLW209het_555syp1_488gfpmsh5_dapi_male1_stitched
27.713	98.8994	SYP1assembly	0.285261	male	syp3het	2022_08_01_DLW209het_555syp1_488gfpmsh5_dapi_male1_stitched
8.79446	107.694	SYP1assembly	0.310627	male	syp3het	2022_08_01_DLW209het_555syp1_488gfpmsh5_dapi_male1_stitched
5.20423	112.898	SYP1assembly	0.325638	male	syp3het	2022_08_01_DLW209het_555syp1_488gfpmsh5_dapi_male1_stitched
16.0578	128.956	SYP1assembly	0.371954	male	syp3het	2022_08_01_DLW209het_555syp1_488gfpmsh5_dapi_male1_stitched
18.8689	147.825	SYP1assembly	0.426379	male	syp3het	2022_08_01_DLW209het_555syp1_488gfpmsh5_dapi_male1_stitched
27.6267	175.451	SYPpartial	0.506064	male	syp3het	2022_08_01_DLW209het_555syp1_488gfpmsh5_dapi_male1_stitched
29.4488	204.9	SYP1	0.591005	male	syp3het	2022_08_01_DLW209het_555syp1_488gfpmsh5_dapi_male1_stitched
32.2163	237.117	SYP1	0.683928	male	syp3het	2022_08_01_DLW209het_555syp1_488gfpmsh5_dapi_male1_stitched
68.2436	305.36	SYP1	0.880767	male	syp3het	2022_08_01_DLW209het_555syp1_488gfpmsh5_dapi_male1_stitched
10.5268	315.887	SYP1	0.91113	male	syp3het	2022_08_01_DLW209het_555syp1_488gfpmsh5_dapi_male1_stitched
30.8111	346.698	SYP1	1	male	syp3het	2022_08_01_DLW209het_555syp1_488gfpmsh5_dapi_male1_stitched
34.195	34.195	None	0.093602	male	syp3het	2022_08_01_DLW209het_555syp1_488gfpmsh5_dapi_male2_stitched
25.1483	59.3433	None	0.16244	male	syp3het	2022_08_01_DLW209het_555syp1_488gfpmsh5_dapi_male2_stitched
32.1133	91.4566	None	0.250344	male	syp3het	2022_08_01_DLW209het_555syp1_488gfpmsh5_dapi_male2_stitched
9.92871	101.385	SYP1assembly	0.277522	male	syp3het	2022_08_01_DLW209het_555syp1_488gfpmsh5_dapi_male2_stitched
10.7147	112.1	SYP1assembly	0.306851	male	syp3het	2022_08_01_DLW209het_555syp1_488gfpmsh5_dapi_male2_stitched
23.3057	135.406	SYP1assembly	0.370646	male	syp3het	2022_08_01_DLW209het_555syp1_488gfpmsh5_dapi_male2_stitched
13.6027	149.008	SYPpartial	0.407881	male	syp3het	2022_08_01_DLW209het_555syp1_488gfpmsh5_dapi_male2_stitched
25.5466	174.555	SYP1	0.477809	male	syp3het	2022_08_01_DLW209het_555syp1_488gfpmsh5_dapi_male2_stitched
23.5181	198.073	SYP1	0.542185	male	syp3het	2022_08_01_DLW209het_555syp1_488gfpmsh5_dapi_male2_stitched
17.0232	215.096	SYP1	0.588783	male	syp3het	2022_08_01_DLW209het_555syp1_488gfpmsh5_dapi_male2_stitched
19.1436	234.24	SYP1	0.641185	male	syp3het	2022_08_01_DLW209het_555syp1_488gfpmsh5_dapi_male2_stitched
20.9984	255.238	SYP1	0.698664	male	syp3het	2022_08_01_DLW209het_555syp1_488gfpmsh5_dapi_male2_stitched
41.8916	297.13	SYP1	0.813333	male	syp3het	2022_08_01_DLW209het_555syp1_488gfpmsh5_dapi_male2_stitched
33.425	330.555	SYP1	0.904828	male	syp3het	2022_08_01_DLW209het_555syp1_488gfpmsh5_dapi_male2_stitched
15.5203	346.075	SYP1	0.947311	male	syp3het	2022_08_01_DLW209het_555syp1_488gfpmsh5_dapi_male2_stitched
19.2484	365.324	SYP1	1	male	syp3het	2022_08_01_DLW209het_555syp1_488gfpmsh5_dapi_male2_stitched
32.2998	32.2998	None	0.0761268	male	syp3het	2022_08_01_DLW209het_555syp1_488gfpmsh5_dapi_male3_stitched
46.2171	78.5169	None	0.185055	male	syp3het	2022_08_01_DLW209het_555syp1_488gfpmsh5_dapi_male3_stitched
37.3959	115.913	None	0.273193	male	syp3het	2022_08_01_DLW209het_555syp1_488gfpmsh5_dapi_male3_stitched
32.5835	148.496	SYP1assembly	0.349989	male	syp3het	2022_08_01_DLW209het_555syp1_488gfpmsh5_dapi_male3_stitched
20.3792	168.876	SYP1assembly	0.39802	male	syp3het	2022_08_01_DLW209het_555syp1_488gfpmsh5_dapi_male3_stitched
26.6263	195.502	SYP1assembly	0.460775	male	syp3het	2022_08_01_DLW209het_555syp1_488gfpmsh5_dapi_male3_stitched
9.56015	205.062	SYP1assembly	0.483308	male	syp3het	2022_08_01_DLW209het_555syp1_488gfpmsh5_dapi_male3_stitched
11.0635	216.126	SYP1assembly	0.509383	male	syp3het	2022_08_01_DLW209het_555syp1_488gfpmsh5_dapi_male3_stitched
7.89942	224.025	SYPpartial	0.528001	male	syp3het	2022_08_01_DLW209het_555syp1_488gfpmsh5_dapi_male3_stitched
9.88683	233.912	SYPpartial	0.551303	male	syp3het	2022_08_01_DLW209het_555syp1_488gfpmsh5_dapi_male3_stitched
19.5743	253.486	SYP1	0.597438	male	syp3het	2022_08_01_DLW209het_555syp1_488gfpmsh5_dapi_male3_stitched
26.0946	279.581	SYP1	0.658939	male	syp3het	2022_08_01_DLW209het_555syp1_488gfpmsh5_dapi_male3_stitched
19.329	298.91	SYP1	0.704496	male	syp3het	2022_08_01_DLW209het_555syp1_488gfpmsh5_dapi_male3_stitched
22.8699	321.78	SYP1	0.758397	male	syp3het	2022_08_01_DLW209het_555syp1_488gfpmsh5_dapi_male3_stitched
39.6352	361.415	SYP1	0.851813	male	syp3het	2022_08_01_DLW209het_555syp1_488gfpmsh5_dapi_male3_stitched
41.1953	402.61	SYP1	0.948905	male	syp3het	2022_08_01_DLW209het_555syp1_488gfpmsh5_dapi_male3_stitched
21.6789	424.289	SYP1	1	male	syp3het	2022_08_01_DLW209het_555syp1_488gfpmsh5_dapi_male3_stitched
42.6731	42.6731	None	0.119724	male	syp3het	2022_08_01_DLW209het_555syp1_488gfpmsh5_dapi_male4_stitched
19.4141	62.0873	None	0.174192	male	syp3het	2022_08_01_DLW209het_555syp1_488gfpmsh5_dapi_male4_stitched
24.9637	87.051	None	0.244231	male	syp3het	2022_08_01_DLW209het_555syp1_488gfpmsh5_dapi_male4_stitched
17.2219	104.273	SYP1assembly	0.292549	male	syp3het	2022_08_01_DLW209het_555syp1_488gfpmsh5_dapi_male4_stitched
9.15386	113.427	SYP1assembly	0.318231	male	syp3het	2022_08_01_DLW209het_555syp1_488gfpmsh5_dapi_male4_stitched
24.9439	138.371	SYP1assembly	0.388213	male	syp3het	2022_08_01_DLW209het_555syp1_488gfpmsh5_dapi_male4_stitched
13.0539	151.425	SYPpartial	0.424837	male	syp3het	2022_08_01_DLW209het_555syp1_488gfpmsh5_dapi_male4_stitched
28.2971	179.722	SYP1	0.504228	male	syp3het	2022_08_01_DLW209het_555syp1_488gfpmsh5_dapi_male4_stitched
22.4117	202.133	SYP1	0.567106	male	syp3het	2022_08_01_DLW209het_555syp1_488gfpmsh5_dapi_male4_stitched
10.1972	212.331	SYP1	0.595716	male	syp3het	2022_08_01_DLW209het_555syp1_488gfpmsh5_dapi_male4_stitched
10.9566	223.287	SYP1	0.626456	male	syp3het	2022_08_01_DLW209het_555syp1_488gfpmsh5_dapi_male4_stitched
10.1915	233.479	SYP1	0.655049	male	syp3het	2022_08_01_DLW209het_555syp1_488gfpmsh5_dapi_male4_stitched
9.09199	242.571	SYP1	0.680558	male	syp3het	2022_08_01_DLW209het_555syp1_488gfpmsh5_dapi_male4_stitched
26.0836	268.654	SYP1	0.753738	male	syp3het	2022_08_01_DLW209het_555syp1_488gfpmsh5_dapi_male4_stitched
45.1472	313.802	SYP1	0.880403	male	syp3het	2022_08_01_DLW209het_555syp1_488gfpmsh5_dapi_male4_stitched
42.6278	356.429	SYP1	1	male	syp3het	2022_08_01_DLW209het_555syp1_488gfpmsh5_dapi_male4_stitched
36.2614	36.2614	None	0.113097	male	syp3het	2022_08_01_DLW209het_555syp1_488gfpmsh5_dapi_male5_stitched
18.4581	54.7195	None	0.170667	male	syp3het	2022_08_01_DLW209het_555syp1_488gfpmsh5_dapi_male5_stitched
13.5183	68.2379	None	0.212829	male	syp3het	2022_08_01_DLW209het_555syp1_488gfpmsh5_dapi_male5_stitched
12.5787	80.8166	SYP1assembly	0.252061	male	syp3het	2022_08_01_DLW209het_555syp1_488gfpmsh5_dapi_male5_stitched
15.9252	96.7418	SYP1assembly	0.301731	male	syp3het	2022_08_01_DLW209het_555syp1_488gfpmsh5_dapi_male5_stitched
25.9253	122.667	SYP1assembly	0.38259	male	syp3het	2022_08_01_DLW209het_555syp1_488gfpmsh5_dapi_male5_stitched
7.43848	130.106	SYP1assembly	0.40579	male	syp3het	2022_08_01_DLW209het_555syp1_488gfpmsh5_dapi_male5_stitched
19.4892	149.595	SYPpartial	0.466576	male	syp3het	2022_08_01_DLW209het_555syp1_488gfpmsh5_dapi_male5_stitched
29.5009	179.096	SYP1	0.558587	male	syp3het	2022_08_01_DLW209het_555syp1_488gfpmsh5_dapi_male5_stitched
16.5413	195.637	SYP1	0.610178	male	syp3het	2022_08_01_DLW209het_555syp1_488gfpmsh5_dapi_male5_stitched
16.2714	211.908	SYP1	0.660928	male	syp3het	2022_08_01_DLW209het_555syp1_488gfpmsh5_dapi_male5_stitched
14.7106	226.619	SYP1	0.706809	male	syp3het	2022_08_01_DLW209het_555syp1_488gfpmsh5_dapi_male5_stitched
13.2396	239.859	SYP1	0.748103	male	syp3het	2022_08_01_DLW209het_555syp1_488gfpmsh5_dapi_male5_stitched
34.6442	274.503	SYP1	0.856155	male	syp3het	2022_08_01_DLW209het_555syp1_488gfpmsh5_dapi_male5_stitched
46.1198	320.622	SYP1	1	male	syp3het	2022_08_01_DLW209het_555syp1_488gfpmsh5_dapi_male5_stitched
30.5329	30.5329	None	0.118316	herm	syp2het	2022_08_10_DLW208het_555syp1_488rad51_dapi_herm1_stitched
6.83191	37.3648	None	0.14479	herm	syp2het	2022_08_10_DLW208het_555syp1_488rad51_dapi_herm1_stitched
12.0555	49.4204	None	0.191506	herm	syp2het	2022_08_10_DLW208het_555syp1_488rad51_dapi_herm1_stitched
12.2937	61.7141	None	0.239144	herm	syp2het	2022_08_10_DLW208het_555syp1_488rad51_dapi_herm1_stitched
8.50173	70.2158	None	0.272089	herm	syp2het	2022_08_10_DLW208het_555syp1_488rad51_dapi_herm1_stitched
13.1794	83.3953	SYP1assembly	0.323159	herm	syp2het	2022_08_10_DLW208het_555syp1_488rad51_dapi_herm1_stitched
8.44203	91.8373	SYP1assembly	0.355873	herm	syp2het	2022_08_10_DLW208het_555syp1_488rad51_dapi_herm1_stitched
25.8453	117.683	SYP1assembly	0.456024	herm	syp2het	2022_08_10_DLW208het_555syp1_488rad51_dapi_herm1_stitched
20.2472	137.93	SYPpartial	0.534482	herm	syp2het	2022_08_10_DLW208het_555syp1_488rad51_dapi_herm1_stitched
20.7965	158.726	SYP1	0.61507	herm	syp2het	2022_08_10_DLW208het_555syp1_488rad51_dapi_herm1_stitched
22.491	181.217	SYP1	0.702223	herm	syp2het	2022_08_10_DLW208het_555syp1_488rad51_dapi_herm1_stitched
29.333	210.55	SYP1	0.815889	herm	syp2het	2022_08_10_DLW208het_555syp1_488rad51_dapi_herm1_stitched
47.512	258.062	SYP1	1	herm	syp2het	2022_08_10_DLW208het_555syp1_488rad51_dapi_herm1_stitched
26.1021	26.1021	None	0.0912676	herm	syp2het	2022_08_10_DLW208het_555syp1_488rad51_dapi_herm2_stitched
21.6236	47.7257	None	0.166876	herm	syp2het	2022_08_10_DLW208het_555syp1_488rad51_dapi_herm2_stitched
17.888	65.6137	None	0.229422	herm	syp2het	2022_08_10_DLW208het_555syp1_488rad51_dapi_herm2_stitched
17.7454	83.3592	SYP1assembly	0.29147	herm	syp2het	2022_08_10_DLW208het_555syp1_488rad51_dapi_herm2_stitched
15.305	98.6641	SYP1assembly	0.344985	herm	syp2het	2022_08_10_DLW208het_555syp1_488rad51_dapi_herm2_stitched
20.6183	119.282	SYP1assembly	0.417078	herm	syp2het	2022_08_10_DLW208het_555syp1_488rad51_dapi_herm2_stitched
17.8794	137.162	SYPpartial	0.479594	herm	syp2het	2022_08_10_DLW208het_555syp1_488rad51_dapi_herm2_stitched
44.5171	181.679	SYP1	0.635251	herm	syp2het	2022_08_10_DLW208het_555syp1_488rad51_dapi_herm2_stitched
33.7214	215.4	SYP1	0.75316	herm	syp2het	2022_08_10_DLW208het_555syp1_488rad51_dapi_herm2_stitched
23.9118	239.312	SYP1	0.836769	herm	syp2het	2022_08_10_DLW208het_555syp1_488rad51_dapi_herm2_stitched
46.6833	285.996	SYP1	1	herm	syp2het	2022_08_10_DLW208het_555syp1_488rad51_dapi_herm2_stitched
21.4028	21.4028	None	0.0822718	herm	syp2het	2022_08_10_DLW208het_555syp1_488rad51_dapi_herm3_stitched
13.005	34.4078	None	0.132263	herm	syp2het	2022_08_10_DLW208het_555syp1_488rad51_dapi_herm3_stitched
10.9599	45.3677	None	0.174392	herm	syp2het	2022_08_10_DLW208het_555syp1_488rad51_dapi_herm3_stitched
18.4049	63.7726	None	0.24514	herm	syp2het	2022_08_10_DLW208het_555syp1_488rad51_dapi_herm3_stitched
8.79722	72.5698	SYP1assembly	0.278957	herm	syp2het	2022_08_10_DLW208het_555syp1_488rad51_dapi_herm3_stitched
9.58341	82.1532	SYP1assembly	0.315795	herm	syp2het	2022_08_10_DLW208het_555syp1_488rad51_dapi_herm3_stitched
13.7195	95.8727	SYP1assembly	0.368533	herm	syp2het	2022_08_10_DLW208het_555syp1_488rad51_dapi_herm3_stitched
28.3553	124.228	SYPpartial	0.47753	herm	syp2het	2022_08_10_DLW208het_555syp1_488rad51_dapi_herm3_stitched
34.9073	159.135	SYP1	0.611713	herm	syp2het	2022_08_10_DLW208het_555syp1_488rad51_dapi_herm3_stitched
27.5934	186.729	SYP1	0.717781	herm	syp2het	2022_08_10_DLW208het_555syp1_488rad51_dapi_herm3_stitched
31.5859	218.315	SYP1	0.839197	herm	syp2het	2022_08_10_DLW208het_555syp1_488rad51_dapi_herm3_stitched
24.9524	243.267	SYP1	0.935113	herm	syp2het	2022_08_10_DLW208het_555syp1_488rad51_dapi_herm3_stitched
16.8801	260.147	SYP1	1	herm	syp2het	2022_08_10_DLW208het_555syp1_488rad51_dapi_herm3_stitched
27.2429	27.2429	None	0.0709776	herm	syp2het	2022_08_10_DLW208het_555syp1_488rad51_dapi_herm4_stitched
36.0567	63.2996	None	0.164918	herm	syp2het	2022_08_10_DLW208het_555syp1_488rad51_dapi_herm4_stitched
8.75621	72.0558	SYP1assembly	0.187731	herm	syp2het	2022_08_10_DLW208het_555syp1_488rad51_dapi_herm4_stitched
17.4045	89.4603	SYP1assembly	0.233076	herm	syp2het	2022_08_10_DLW208het_555syp1_488rad51_dapi_herm4_stitched
28.2671	117.727	SYP1assembly	0.306722	herm	syp2het	2022_08_10_DLW208het_555syp1_488rad51_dapi_herm4_stitched
31.3865	149.114	SYP1assembly	0.388495	herm	syp2het	2022_08_10_DLW208het_555syp1_488rad51_dapi_herm4_stitched
20.3333	169.447	SYP1assembly	0.441471	herm	syp2het	2022_08_10_DLW208het_555syp1_488rad51_dapi_herm4_stitched
23.9278	193.375	SYPpartial	0.503811	herm	syp2het	2022_08_10_DLW208het_555syp1_488rad51_dapi_herm4_stitched
37.953	231.328	SYP1	0.602693	herm	syp2het	2022_08_10_DLW208het_555syp1_488rad51_dapi_herm4_stitched
33.6171	264.945	SYP1	0.690277	herm	syp2het	2022_08_10_DLW208het_555syp1_488rad51_dapi_herm4_stitched
74.0136	338.959	SYP1	0.883109	herm	syp2het	2022_08_10_DLW208het_555syp1_488rad51_dapi_herm4_stitched
44.8655	383.824	SYP1	1	herm	syp2het	2022_08_10_DLW208het_555syp1_488rad51_dapi_herm4_stitched
28.8036	28.8036	None	0.0669934	herm	syp2het	2022_08_10_DLW208het_555syp1_488rad51_dapi_herm5_stitched
34.5119	63.3155	None	0.147263	herm	syp2het	2022_08_10_DLW208het_555syp1_488rad51_dapi_herm5_stitched
21.2772	84.5926	SYP1assembly	0.196751	herm	syp2het	2022_08_10_DLW208het_555syp1_488rad51_dapi_herm5_stitched
4.76343	89.3561	SYP1assembly	0.20783	herm	syp2het	2022_08_10_DLW208het_555syp1_488rad51_dapi_herm5_stitched
13.7531	103.109	SYP1assembly	0.239818	herm	syp2het	2022_08_10_DLW208het_555syp1_488rad51_dapi_herm5_stitched
17.4676	120.577	SYP1assembly	0.280446	herm	syp2het	2022_08_10_DLW208het_555syp1_488rad51_dapi_herm5_stitched
22.1311	142.708	SYP1assembly	0.33192	herm	syp2het	2022_08_10_DLW208het_555syp1_488rad51_dapi_herm5_stitched
30.5138	173.222	SYPpartial	0.402891	herm	syp2het	2022_08_10_DLW208het_555syp1_488rad51_dapi_herm5_stitched
29.5061	202.728	SYPpartial	0.471518	herm	syp2het	2022_08_10_DLW208het_555syp1_488rad51_dapi_herm5_stitched
30.3036	233.031	SYP1	0.542	herm	syp2het	2022_08_10_DLW208het_555syp1_488rad51_dapi_herm5_stitched
25.3687	258.4	SYP1	0.601005	herm	syp2het	2022_08_10_DLW208het_555syp1_488rad51_dapi_herm5_stitched
15.6051	274.005	SYP1	0.6373	herm	syp2het	2022_08_10_DLW208het_555syp1_488rad51_dapi_herm5_stitched
14.1675	288.173	SYP1	0.670252	herm	syp2het	2022_08_10_DLW208het_555syp1_488rad51_dapi_herm5_stitched
22.9847	311.157	SYP1	0.723711	herm	syp2het	2022_08_10_DLW208het_555syp1_488rad51_dapi_herm5_stitched
18.3814	329.539	SYP1	0.766464	herm	syp2het	2022_08_10_DLW208het_555syp1_488rad51_dapi_herm5_stitched
21.1766	350.715	SYP1	0.815718	herm	syp2het	2022_08_10_DLW208het_555syp1_488rad51_dapi_herm5_stitched
12.9421	363.658	SYP1	0.84582	herm	syp2het	2022_08_10_DLW208het_555syp1_488rad51_dapi_herm5_stitched
20.8457	384.503	SYP1	0.894304	herm	syp2het	2022_08_10_DLW208het_555syp1_488rad51_dapi_herm5_stitched
17.2203	401.724	SYP1	0.934356	herm	syp2het	2022_08_10_DLW208het_555syp1_488rad51_dapi_herm5_stitched
28.2233	429.947	SYP1	1	herm	syp2het	2022_08_10_DLW208het_555syp1_488rad51_dapi_herm5_stitched
37.9462	37.9462	None	0.0981969	herm	syp2het	2022_08_10_DLW208het_555syp1_488rad51_dapi_herm6_stitched
38.0672	76.0135	None	0.196707	herm	syp2het	2022_08_10_DLW208het_555syp1_488rad51_dapi_herm6_stitched
9.87235	85.8858	None	0.222254	herm	syp2het	2022_08_10_DLW208het_555syp1_488rad51_dapi_herm6_stitched
6.7528	92.6386	None	0.239729	herm	syp2het	2022_08_10_DLW208het_555syp1_488rad51_dapi_herm6_stitched
9.58624	102.225	SYP1assembly	0.264536	herm	syp2het	2022_08_10_DLW208het_555syp1_488rad51_dapi_herm6_stitched
9.13627	111.361	SYP1assembly	0.288179	herm	syp2het	2022_08_10_DLW208het_555syp1_488rad51_dapi_herm6_stitched
31.2154	142.577	SYP1assembly	0.368958	herm	syp2het	2022_08_10_DLW208het_555syp1_488rad51_dapi_herm6_stitched
19.0293	161.606	SYP1assembly	0.418202	herm	syp2het	2022_08_10_DLW208het_555syp1_488rad51_dapi_herm6_stitched
25.7847	187.39	SYPpartial	0.484927	herm	syp2het	2022_08_10_DLW208het_555syp1_488rad51_dapi_herm6_stitched
40.4079	227.798	SYP1	0.589494	herm	syp2het	2022_08_10_DLW208het_555syp1_488rad51_dapi_herm6_stitched
27.4106	255.209	SYP1	0.660427	herm	syp2het	2022_08_10_DLW208het_555syp1_488rad51_dapi_herm6_stitched
32.1451	287.354	SYP1	0.743612	herm	syp2het	2022_08_10_DLW208het_555syp1_488rad51_dapi_herm6_stitched
42.7139	330.068	SYP1	0.854147	herm	syp2het	2022_08_10_DLW208het_555syp1_488rad51_dapi_herm6_stitched
41.0805	371.148	SYP1	0.960454	herm	syp2het	2022_08_10_DLW208het_555syp1_488rad51_dapi_herm6_stitched
10.1973	381.346	SYP1	0.986843	herm	syp2het	2022_08_10_DLW208het_555syp1_488rad51_dapi_herm6_stitched
5.08439	386.43	SYP1	1	herm	syp2het	2022_08_10_DLW208het_555syp1_488rad51_dapi_herm6_stitched
41.1645	41.1645	None	0.113659	herm	syp2het	2022_08_10_DLW208het_555syp1_488rad51_dapi_herm7_stitched
27.0512	68.2157	None	0.18835	herm	syp2het	2022_08_10_DLW208het_555syp1_488rad51_dapi_herm7_stitched
10.0029	78.2186	SYP1assembly	0.215969	herm	syp2het	2022_08_10_DLW208het_555syp1_488rad51_dapi_herm7_stitched
4.58704	82.8056	SYP1assembly	0.228634	herm	syp2het	2022_08_10_DLW208het_555syp1_488rad51_dapi_herm7_stitched
48.4384	131.244	SYP1assembly	0.362377	herm	syp2het	2022_08_10_DLW208het_555syp1_488rad51_dapi_herm7_stitched
20.0418	151.286	SYPpartial	0.417714	herm	syp2het	2022_08_10_DLW208het_555syp1_488rad51_dapi_herm7_stitched
24.6124	175.898	SYP1	0.485671	herm	syp2het	2022_08_10_DLW208het_555syp1_488rad51_dapi_herm7_stitched
8.67216	184.57	SYP1	0.509616	herm	syp2het	2022_08_10_DLW208het_555syp1_488rad51_dapi_herm7_stitched
11.431	196.001	SYP1	0.541178	herm	syp2het	2022_08_10_DLW208het_555syp1_488rad51_dapi_herm7_stitched
13.5996	209.601	SYP1	0.578728	herm	syp2het	2022_08_10_DLW208het_555syp1_488rad51_dapi_herm7_stitched
21.1298	230.731	SYP1	0.637069	herm	syp2het	2022_08_10_DLW208het_555syp1_488rad51_dapi_herm7_stitched
19.6903	250.421	SYP1	0.691436	herm	syp2het	2022_08_10_DLW208het_555syp1_488rad51_dapi_herm7_stitched
18.6149	269.036	SYP1	0.742834	herm	syp2het	2022_08_10_DLW208het_555syp1_488rad51_dapi_herm7_stitched
26.6206	295.657	SYP1	0.816336	herm	syp2het	2022_08_10_DLW208het_555syp1_488rad51_dapi_herm7_stitched
27.8722	323.529	SYP1	0.893293	herm	syp2het	2022_08_10_DLW208het_555syp1_488rad51_dapi_herm7_stitched
38.6465	362.175	SYP1	1	herm	syp2het	2022_08_10_DLW208het_555syp1_488rad51_dapi_herm7_stitched
51.1156	51.1156	None	0.161932	male	syp2het	2022_08_10_DLW208het_555syp1_488rad51_dapi_male2_stitched
34.1327	85.2483	None	0.270063	male	syp2het	2022_08_10_DLW208het_555syp1_488rad51_dapi_male2_stitched
8.24263	93.4909	SYP1assembly	0.296176	male	syp2het	2022_08_10_DLW208het_555syp1_488rad51_dapi_male2_stitched
7.7477	101.239	SYP1assembly	0.32072	male	syp2het	2022_08_10_DLW208het_555syp1_488rad51_dapi_male2_stitched
23.2471	124.486	SYP1assembly	0.394366	male	syp2het	2022_08_10_DLW208het_555syp1_488rad51_dapi_male2_stitched
8.21294	132.699	SYPpartial	0.420384	male	syp2het	2022_08_10_DLW208het_555syp1_488rad51_dapi_male2_stitched
21.533	154.232	SYP1	0.4886	male	syp2het	2022_08_10_DLW208het_555syp1_488rad51_dapi_male2_stitched
11.2135	165.445	SYP1	0.524124	male	syp2het	2022_08_10_DLW208het_555syp1_488rad51_dapi_male2_stitched
11.889	177.334	SYP1	0.561787	male	syp2het	2022_08_10_DLW208het_555syp1_488rad51_dapi_male2_stitched
13.2134	190.547	SYP1	0.603647	male	syp2het	2022_08_10_DLW208het_555syp1_488rad51_dapi_male2_stitched
6.17087	196.718	SYP1	0.623196	male	syp2het	2022_08_10_DLW208het_555syp1_488rad51_dapi_male2_stitched
7.08808	203.806	SYP1	0.645651	male	syp2het	2022_08_10_DLW208het_555syp1_488rad51_dapi_male2_stitched
15.6763	219.483	SYP1	0.695313	male	syp2het	2022_08_10_DLW208het_555syp1_488rad51_dapi_male2_stitched
25.3876	244.87	SYP1	0.77574	male	syp2het	2022_08_10_DLW208het_555syp1_488rad51_dapi_male2_stitched
28.9592	273.829	SYP1	0.867481	male	syp2het	2022_08_10_DLW208het_555syp1_488rad51_dapi_male2_stitched
41.8309	315.66	SYP1	1	male	syp2het	2022_08_10_DLW208het_555syp1_488rad51_dapi_male2_stitched
45.4653	45.4653	None	0.132987	male	syp2het	2022_08_10_DLW208het_555syp1_488rad51_dapi_male3_stitched
42.4409	87.9063	None	0.257127	male	syp2het	2022_08_10_DLW208het_555syp1_488rad51_dapi_male3_stitched
22.4501	110.356	SYP1assembly	0.322794	male	syp2het	2022_08_10_DLW208het_555syp1_488rad51_dapi_male3_stitched
12.5729	122.929	SYP1assembly	0.359569	male	syp2het	2022_08_10_DLW208het_555syp1_488rad51_dapi_male3_stitched
23.8442	146.774	SYP1assembly	0.429314	male	syp2het	2022_08_10_DLW208het_555syp1_488rad51_dapi_male3_stitched
25.7433	172.517	SYPpartial	0.504613	male	syp2het	2022_08_10_DLW208het_555syp1_488rad51_dapi_male3_stitched
16.266	188.783	SYP1	0.552191	male	syp2het	2022_08_10_DLW208het_555syp1_488rad51_dapi_male3_stitched
22.2612	211.044	SYP1	0.617306	male	syp2het	2022_08_10_DLW208het_555syp1_488rad51_dapi_male3_stitched
17.0192	228.063	SYP1	0.667087	male	syp2het	2022_08_10_DLW208het_555syp1_488rad51_dapi_male3_stitched
30.4923	258.556	SYP1	0.756277	male	syp2het	2022_08_10_DLW208het_555syp1_488rad51_dapi_male3_stitched
44.792	303.348	SYP1	0.887294	male	syp2het	2022_08_10_DLW208het_555syp1_488rad51_dapi_male3_stitched
38.5317	341.879	SYP1	1	male	syp2het	2022_08_10_DLW208het_555syp1_488rad51_dapi_male3_stitched
46.2619	46.2619	None	0.131316	male	syp2het	2022_08_10_DLW208het_555syp1_488rad51_dapi_male4_stitched
52.0076	98.2695	None	0.278941	male	syp2het	2022_08_10_DLW208het_555syp1_488rad51_dapi_male4_stitched
7.1046	105.374	SYP1assembly	0.299108	male	syp2het	2022_08_10_DLW208het_555syp1_488rad51_dapi_male4_stitched
11.3793	116.753	SYP1assembly	0.331408	male	syp2het	2022_08_10_DLW208het_555syp1_488rad51_dapi_male4_stitched
22.3682	139.122	SYP1assembly	0.394901	male	syp2het	2022_08_10_DLW208het_555syp1_488rad51_dapi_male4_stitched
14.39	153.512	SYPpartial	0.435747	male	syp2het	2022_08_10_DLW208het_555syp1_488rad51_dapi_male4_stitched
12.8794	166.391	SYP1	0.472306	male	syp2het	2022_08_10_DLW208het_555syp1_488rad51_dapi_male4_stitched
13.8053	180.196	SYP1	0.511492	male	syp2het	2022_08_10_DLW208het_555syp1_488rad51_dapi_male4_stitched
13.1304	193.327	SYP1	0.548763	male	syp2het	2022_08_10_DLW208het_555syp1_488rad51_dapi_male4_stitched
33.3046	226.631	SYP1	0.6433	male	syp2het	2022_08_10_DLW208het_555syp1_488rad51_dapi_male4_stitched
84.6163	311.248	SYP1	0.883486	male	syp2het	2022_08_10_DLW208het_555syp1_488rad51_dapi_male4_stitched
41.0475	352.295	SYP1	1	male	syp2het	2022_08_10_DLW208het_555syp1_488rad51_dapi_male4_stitched
36.2915	36.2915	None	0.104476	male	syp2het	2022_08_10_DLW208het_555syp1_488rad51_dapi_male5_stitched
41.3625	77.654	None	0.22355	male	syp2het	2022_08_10_DLW208het_555syp1_488rad51_dapi_male5_stitched
11.6894	89.3434	SYP1assembly	0.257201	male	syp2het	2022_08_10_DLW208het_555syp1_488rad51_dapi_male5_stitched
9.27454	98.618	SYP1assembly	0.2839	male	syp2het	2022_08_10_DLW208het_555syp1_488rad51_dapi_male5_stitched
15.5689	114.187	SYP1assembly	0.32872	male	syp2het	2022_08_10_DLW208het_555syp1_488rad51_dapi_male5_stitched
22.8384	137.025	SYP1assembly	0.394467	male	syp2het	2022_08_10_DLW208het_555syp1_488rad51_dapi_male5_stitched
10.8767	147.902	SYPpartial	0.425779	male	syp2het	2022_08_10_DLW208het_555syp1_488rad51_dapi_male5_stitched
14.0109	161.913	SYP1	0.466113	male	syp2het	2022_08_10_DLW208het_555syp1_488rad51_dapi_male5_stitched
16.3867	178.3	SYP1	0.513287	male	syp2het	2022_08_10_DLW208het_555syp1_488rad51_dapi_male5_stitched
44.0232	222.323	SYP1	0.64002	male	syp2het	2022_08_10_DLW208het_555syp1_488rad51_dapi_male5_stitched
39.5076	261.83	SYP1	0.753755	male	syp2het	2022_08_10_DLW208het_555syp1_488rad51_dapi_male5_stitched
40.1341	301.965	SYP1	0.869292	male	syp2het	2022_08_10_DLW208het_555syp1_488rad51_dapi_male5_stitched
45.4037	347.368	SYP1	1	male	syp2het	2022_08_10_DLW208het_555syp1_488rad51_dapi_male5_stitched
36.1475	36.1475	None	0.100963	male	syp2het	2022_08_10_DLW208het_555syp1_488rad51_dapi_male6_stitched
15.3747	51.5222	None	0.143907	male	syp2het	2022_08_10_DLW208het_555syp1_488rad51_dapi_male6_stitched
28.8659	80.3881	None	0.224532	male	syp2het	2022_08_10_DLW208het_555syp1_488rad51_dapi_male6_stitched
15.3611	95.7493	SYP1assembly	0.267437	male	syp2het	2022_08_10_DLW208het_555syp1_488rad51_dapi_male6_stitched
8.11707	103.866	SYP1assembly	0.290109	male	syp2het	2022_08_10_DLW208het_555syp1_488rad51_dapi_male6_stitched
13.1238	116.99	SYP1assembly	0.326765	male	syp2het	2022_08_10_DLW208het_555syp1_488rad51_dapi_male6_stitched
15.3472	132.337	SYPpartial	0.369631	male	syp2het	2022_08_10_DLW208het_555syp1_488rad51_dapi_male6_stitched
28.2884	160.626	SYP1	0.448643	male	syp2het	2022_08_10_DLW208het_555syp1_488rad51_dapi_male6_stitched
20.6805	181.306	SYP1	0.506406	male	syp2het	2022_08_10_DLW208het_555syp1_488rad51_dapi_male6_stitched
22.396	203.702	SYP1	0.56896	male	syp2het	2022_08_10_DLW208het_555syp1_488rad51_dapi_male6_stitched
8.38468	212.087	SYP1	0.592379	male	syp2het	2022_08_10_DLW208het_555syp1_488rad51_dapi_male6_stitched
11.913	224	SYP1	0.625654	male	syp2het	2022_08_10_DLW208het_555syp1_488rad51_dapi_male6_stitched
11.0365	235.036	SYP1	0.65648	male	syp2het	2022_08_10_DLW208het_555syp1_488rad51_dapi_male6_stitched
48.7615	283.798	SYP1	0.792675	male	syp2het	2022_08_10_DLW208het_555syp1_488rad51_dapi_male6_stitched
26.3844	310.182	SYP1	0.866369	male	syp2het	2022_08_10_DLW208het_555syp1_488rad51_dapi_male6_stitched
15.3745	325.557	SYP1	0.909312	male	syp2het	2022_08_10_DLW208het_555syp1_488rad51_dapi_male6_stitched
13.0832	338.64	SYP1	0.945854	male	syp2het	2022_08_10_DLW208het_555syp1_488rad51_dapi_male6_stitched
19.3855	358.025	SYP1	1	male	syp2het	2022_08_10_DLW208het_555syp1_488rad51_dapi_male6_stitched
30.1645	30.1645	None	0.0950642	herm	syp3het	2022_08_10_DLW209het_555syp1_488rad51_dapi_herm1_stitched
25.1534	55.3179	None	0.174336	herm	syp3het	2022_08_10_DLW209het_555syp1_488rad51_dapi_herm1_stitched
19.394	74.7118	None	0.235456	herm	syp3het	2022_08_10_DLW209het_555syp1_488rad51_dapi_herm1_stitched
21.8889	96.6007	SYP1assembly	0.30444	herm	syp3het	2022_08_10_DLW209het_555syp1_488rad51_dapi_herm1_stitched
11.2248	107.826	SYP1assembly	0.339815	herm	syp3het	2022_08_10_DLW209het_555syp1_488rad51_dapi_herm1_stitched
10.3676	118.193	SYP1assembly	0.372489	herm	syp3het	2022_08_10_DLW209het_555syp1_488rad51_dapi_herm1_stitched
35.9471	154.14	SYP1assembly	0.485777	herm	syp3het	2022_08_10_DLW209het_555syp1_488rad51_dapi_herm1_stitched
18.5416	172.682	SYPpartial	0.544211	herm	syp3het	2022_08_10_DLW209het_555syp1_488rad51_dapi_herm1_stitched
49.7401	222.422	SYP1	0.700969	herm	syp3het	2022_08_10_DLW209het_555syp1_488rad51_dapi_herm1_stitched
54.2182	276.64	SYP1	0.871839	herm	syp3het	2022_08_10_DLW209het_555syp1_488rad51_dapi_herm1_stitched
25.2095	301.85	SYP1	0.951287	herm	syp3het	2022_08_10_DLW209het_555syp1_488rad51_dapi_herm1_stitched
15.4569	317.306	SYP1	1	herm	syp3het	2022_08_10_DLW209het_555syp1_488rad51_dapi_herm1_stitched
37.9903	37.9903	None	0.118182	herm	syp3het	2022_08_10_DLW209het_555syp1_488rad51_dapi_herm2_stitched
13.4017	51.392	None	0.159873	herm	syp3het	2022_08_10_DLW209het_555syp1_488rad51_dapi_herm2_stitched
20.953	72.345	None	0.225055	herm	syp3het	2022_08_10_DLW209het_555syp1_488rad51_dapi_herm2_stitched
10.8213	83.1663	SYP1assembly	0.258718	herm	syp3het	2022_08_10_DLW209het_555syp1_488rad51_dapi_herm2_stitched
12.1376	95.3038	SYP1assembly	0.296476	herm	syp3het	2022_08_10_DLW209het_555syp1_488rad51_dapi_herm2_stitched
11.5896	106.893	SYP1assembly	0.33253	herm	syp3het	2022_08_10_DLW209het_555syp1_488rad51_dapi_herm2_stitched
17.1524	124.046	SYP1assembly	0.385888	herm	syp3het	2022_08_10_DLW209het_555syp1_488rad51_dapi_herm2_stitched
16.9588	141.005	SYPpartial	0.438645	herm	syp3het	2022_08_10_DLW209het_555syp1_488rad51_dapi_herm2_stitched
50.0588	191.063	SYP1	0.59437	herm	syp3het	2022_08_10_DLW209het_555syp1_488rad51_dapi_herm2_stitched
48.444	239.507	SYP1	0.745073	herm	syp3het	2022_08_10_DLW209het_555syp1_488rad51_dapi_herm2_stitched
81.9477	321.455	SYP1	1	herm	syp3het	2022_08_10_DLW209het_555syp1_488rad51_dapi_herm2_stitched
32.7545	32.7545	None	0.0904166	herm	syp3het	2022_08_10_DLW209het_555syp1_488rad51_dapi_herm3_stitched
41.796	74.5506	None	0.205792	herm	syp3het	2022_08_10_DLW209het_555syp1_488rad51_dapi_herm3_stitched
13.843	88.3936	SYP1assembly	0.244004	herm	syp3het	2022_08_10_DLW209het_555syp1_488rad51_dapi_herm3_stitched
9.21777	97.6113	SYP1assembly	0.269449	herm	syp3het	2022_08_10_DLW209het_555syp1_488rad51_dapi_herm3_stitched
31.9054	129.517	SYP1assembly	0.357522	herm	syp3het	2022_08_10_DLW209het_555syp1_488rad51_dapi_herm3_stitched
11.9764	141.493	SYPpartial	0.390582	herm	syp3het	2022_08_10_DLW209het_555syp1_488rad51_dapi_herm3_stitched
64.1489	205.642	SYP1	0.567661	herm	syp3het	2022_08_10_DLW209het_555syp1_488rad51_dapi_herm3_stitched
35.7813	241.423	SYP1	0.666432	herm	syp3het	2022_08_10_DLW209het_555syp1_488rad51_dapi_herm3_stitched
30.6547	272.078	SYP1	0.751053	herm	syp3het	2022_08_10_DLW209het_555syp1_488rad51_dapi_herm3_stitched
35.1925	307.27	SYP1	0.848199	herm	syp3het	2022_08_10_DLW209het_555syp1_488rad51_dapi_herm3_stitched
54.9918	362.262	SYP1	1	herm	syp3het	2022_08_10_DLW209het_555syp1_488rad51_dapi_herm3_stitched
37.3979	37.3979	None	0.0999471	herm	syp3het	2022_08_10_DLW209het_555syp1_488rad51_dapi_herm4_stitched
11.2972	48.6951	None	0.130139	herm	syp3het	2022_08_10_DLW209het_555syp1_488rad51_dapi_herm4_stitched
15.5191	64.2143	SYP1assembly	0.171615	herm	syp3het	2022_08_10_DLW209het_555syp1_488rad51_dapi_herm4_stitched
7.8529	72.0672	SYP1assembly	0.192602	herm	syp3het	2022_08_10_DLW209het_555syp1_488rad51_dapi_herm4_stitched
9.54609	81.6133	SYP1assembly	0.218114	herm	syp3het	2022_08_10_DLW209het_555syp1_488rad51_dapi_herm4_stitched
12.5399	94.1531	SYP1assembly	0.251627	herm	syp3het	2022_08_10_DLW209het_555syp1_488rad51_dapi_herm4_stitched
11.8265	105.98	SYP1assembly	0.283234	herm	syp3het	2022_08_10_DLW209het_555syp1_488rad51_dapi_herm4_stitched
15.56	121.54	SYPpartial	0.324818	herm	syp3het	2022_08_10_DLW209het_555syp1_488rad51_dapi_herm4_stitched
30.7314	152.271	SYP1	0.406949	herm	syp3het	2022_08_10_DLW209het_555syp1_488rad51_dapi_herm4_stitched
25.2495	177.52	SYP1	0.474429	herm	syp3het	2022_08_10_DLW209het_555syp1_488rad51_dapi_herm4_stitched
42.8842	220.405	SYP1	0.589038	herm	syp3het	2022_08_10_DLW209het_555syp1_488rad51_dapi_herm4_stitched
34.5657	254.97	SYP1	0.681416	herm	syp3het	2022_08_10_DLW209het_555syp1_488rad51_dapi_herm4_stitched
52.7541	307.724	SYP1	0.822403	herm	syp3het	2022_08_10_DLW209het_555syp1_488rad51_dapi_herm4_stitched
28.2793	336.004	SYP1	0.89798	herm	syp3het	2022_08_10_DLW209het_555syp1_488rad51_dapi_herm4_stitched
20.4109	356.415	SYP1	0.952529	herm	syp3het	2022_08_10_DLW209het_555syp1_488rad51_dapi_herm4_stitched
17.7626	374.177	SYP1	1	herm	syp3het	2022_08_10_DLW209het_555syp1_488rad51_dapi_herm4_stitched
23.7671	23.7671	None	0.0734547	herm	syp3het	2022_08_10_DLW209het_555syp1_488rad51_dapi_herm5_stitched
9.57064	33.3377	None	0.103034	herm	syp3het	2022_08_10_DLW209het_555syp1_488rad51_dapi_herm5_stitched
14.3755	47.7132	None	0.147463	herm	syp3het	2022_08_10_DLW209het_555syp1_488rad51_dapi_herm5_stitched
10.474	58.1872	None	0.179834	herm	syp3het	2022_08_10_DLW209het_555syp1_488rad51_dapi_herm5_stitched
17.7015	75.8887	None	0.234542	herm	syp3het	2022_08_10_DLW209het_555syp1_488rad51_dapi_herm5_stitched
12.5377	88.4264	SYP1assembly	0.273291	herm	syp3het	2022_08_10_DLW209het_555syp1_488rad51_dapi_herm5_stitched
12.8755	101.302	SYP1assembly	0.313085	herm	syp3het	2022_08_10_DLW209het_555syp1_488rad51_dapi_herm5_stitched
22.3925	123.694	SYP1assembly	0.382291	herm	syp3het	2022_08_10_DLW209het_555syp1_488rad51_dapi_herm5_stitched
23.7069	147.401	SYPpartial	0.45556	herm	syp3het	2022_08_10_DLW209het_555syp1_488rad51_dapi_herm5_stitched
69.525	216.926	SYP1	0.670434	herm	syp3het	2022_08_10_DLW209het_555syp1_488rad51_dapi_herm5_stitched
68.4978	285.424	SYP1	0.882134	herm	syp3het	2022_08_10_DLW209het_555syp1_488rad51_dapi_herm5_stitched
38.1367	323.561	SYP1	1	herm	syp3het	2022_08_10_DLW209het_555syp1_488rad51_dapi_herm5_stitched
17.6428	17.6428	None	0.0536536	herm	syp3het	2022_08_10_DLW209het_555syp1_488rad51_dapi_herm6_stitched
18.0128	35.6557	None	0.108432	herm	syp3het	2022_08_10_DLW209het_555syp1_488rad51_dapi_herm6_stitched
29.6645	65.3201	None	0.198645	herm	syp3het	2022_08_10_DLW209het_555syp1_488rad51_dapi_herm6_stitched
10.3468	75.667	SYP1assembly	0.230111	herm	syp3het	2022_08_10_DLW209het_555syp1_488rad51_dapi_herm6_stitched
5.99571	81.6627	SYP1assembly	0.248344	herm	syp3het	2022_08_10_DLW209het_555syp1_488rad51_dapi_herm6_stitched
32.533	114.196	SYP1assembly	0.34728	herm	syp3het	2022_08_10_DLW209het_555syp1_488rad51_dapi_herm6_stitched
12.9027	127.098	SYPpartial	0.386519	herm	syp3het	2022_08_10_DLW209het_555syp1_488rad51_dapi_herm6_stitched
45.2463	172.345	SYP1	0.524117	herm	syp3het	2022_08_10_DLW209het_555syp1_488rad51_dapi_herm6_stitched
24.0605	196.405	SYP1	0.597288	herm	syp3het	2022_08_10_DLW209het_555syp1_488rad51_dapi_herm6_stitched
40.9146	237.32	SYP1	0.721713	herm	syp3het	2022_08_10_DLW209het_555syp1_488rad51_dapi_herm6_stitched
45.9285	283.248	SYP1	0.861386	herm	syp3het	2022_08_10_DLW209het_555syp1_488rad51_dapi_herm6_stitched
45.5803	328.829	SYP1	1	herm	syp3het	2022_08_10_DLW209het_555syp1_488rad51_dapi_herm6_stitched
54.1486	54.1486	None	0.162573	male	syp3het	2022_08_10_DLW209het_555syp1_488rad51_dapi_male1_stitched
34.6126	88.7611	None	0.266491	male	syp3het	2022_08_10_DLW209het_555syp1_488rad51_dapi_male1_stitched
14.3393	103.1	SYP1assembly	0.309543	male	syp3het	2022_08_10_DLW209het_555syp1_488rad51_dapi_male1_stitched
10.4886	113.589	SYP1assembly	0.341033	male	syp3het	2022_08_10_DLW209het_555syp1_488rad51_dapi_male1_stitched
23.3909	136.98	SYP1assembly	0.411261	male	syp3het	2022_08_10_DLW209het_555syp1_488rad51_dapi_male1_stitched
6.86526	143.845	SYPpartial	0.431873	male	syp3het	2022_08_10_DLW209het_555syp1_488rad51_dapi_male1_stitched
32.6973	176.542	SYP1	0.530041	male	syp3het	2022_08_10_DLW209het_555syp1_488rad51_dapi_male1_stitched
15.4937	192.036	SYP1	0.576559	male	syp3het	2022_08_10_DLW209het_555syp1_488rad51_dapi_male1_stitched
17.1109	209.147	SYP1	0.627932	male	syp3het	2022_08_10_DLW209het_555syp1_488rad51_dapi_male1_stitched
13.587	222.734	SYP1	0.668725	male	syp3het	2022_08_10_DLW209het_555syp1_488rad51_dapi_male1_stitched
11.9618	234.696	SYP1	0.704638	male	syp3het	2022_08_10_DLW209het_555syp1_488rad51_dapi_male1_stitched
17.8595	252.556	SYP1	0.758259	male	syp3het	2022_08_10_DLW209het_555syp1_488rad51_dapi_male1_stitched
34.7808	287.336	SYP1	0.862683	male	syp3het	2022_08_10_DLW209het_555syp1_488rad51_dapi_male1_stitched
45.7367	333.073	SYP1	1	male	syp3het	2022_08_10_DLW209het_555syp1_488rad51_dapi_male1_stitched
50.3487	50.3487	None	0.140104	male	syp3het	2022_08_10_DLW209het_555syp1_488rad51_dapi_male3_stitched
20.7856	71.1343	None	0.197944	male	syp3het	2022_08_10_DLW209het_555syp1_488rad51_dapi_male3_stitched
28.2894	99.4237	None	0.276664	male	syp3het	2022_08_10_DLW209het_555syp1_488rad51_dapi_male3_stitched
7.71604	107.14	None	0.298135	male	syp3het	2022_08_10_DLW209het_555syp1_488rad51_dapi_male3_stitched
12.1495	119.289	SYP1assembly	0.331944	male	syp3het	2022_08_10_DLW209het_555syp1_488rad51_dapi_male3_stitched
7.83651	127.126	SYP1assembly	0.35375	male	syp3het	2022_08_10_DLW209het_555syp1_488rad51_dapi_male3_stitched
22.4051	149.531	SYP1assembly	0.416096	male	syp3het	2022_08_10_DLW209het_555syp1_488rad51_dapi_male3_stitched
15.7014	165.232	SYPpartial	0.459788	male	syp3het	2022_08_10_DLW209het_555syp1_488rad51_dapi_male3_stitched
10.726	175.958	SYP1	0.489635	male	syp3het	2022_08_10_DLW209het_555syp1_488rad51_dapi_male3_stitched
22.8498	198.808	SYP1	0.553219	male	syp3het	2022_08_10_DLW209het_555syp1_488rad51_dapi_male3_stitched
22.582	221.39	SYP1	0.616057	male	syp3het	2022_08_10_DLW209het_555syp1_488rad51_dapi_male3_stitched
28.1286	249.519	SYP1	0.69433	male	syp3het	2022_08_10_DLW209het_555syp1_488rad51_dapi_male3_stitched
57.9305	307.449	SYP1	0.855532	male	syp3het	2022_08_10_DLW209het_555syp1_488rad51_dapi_male3_stitched
51.9168	359.366	SYP1	1	male	syp3het	2022_08_10_DLW209het_555syp1_488rad51_dapi_male3_stitched
50.9477	50.9477	None	0.152849	male	syp3het	2022_08_10_DLW209het_555syp1_488rad51_dapi_male4_stitched
36.4982	87.4458	None	0.262348	male	syp3het	2022_08_10_DLW209het_555syp1_488rad51_dapi_male4_stitched
21.4926	108.938	SYP1assembly	0.326828	male	syp3het	2022_08_10_DLW209het_555syp1_488rad51_dapi_male4_stitched
12.9429	121.881	SYP1assembly	0.365659	male	syp3het	2022_08_10_DLW209het_555syp1_488rad51_dapi_male4_stitched
19.4002	141.282	SYP1assembly	0.423862	male	syp3het	2022_08_10_DLW209het_555syp1_488rad51_dapi_male4_stitched
9.61512	150.897	SYPpartial	0.452708	male	syp3het	2022_08_10_DLW209het_555syp1_488rad51_dapi_male4_stitched
10.2354	161.132	SYP1	0.483415	male	syp3het	2022_08_10_DLW209het_555syp1_488rad51_dapi_male4_stitched
21.5561	182.688	SYP1	0.548086	male	syp3het	2022_08_10_DLW209het_555syp1_488rad51_dapi_male4_stitched
14.435	197.123	SYP1	0.591393	male	syp3het	2022_08_10_DLW209het_555syp1_488rad51_dapi_male4_stitched
16.5901	213.713	SYP1	0.641165	male	syp3het	2022_08_10_DLW209het_555syp1_488rad51_dapi_male4_stitched
35.1988	248.912	SYP1	0.746766	male	syp3het	2022_08_10_DLW209het_555syp1_488rad51_dapi_male4_stitched
41.8331	290.745	SYP1	0.87227	male	syp3het	2022_08_10_DLW209het_555syp1_488rad51_dapi_male4_stitched
42.5749	333.32	SYP1	1	male	syp3het	2022_08_10_DLW209het_555syp1_488rad51_dapi_male4_stitched
48.8532	48.8532	None	0.114314	male	syp3het	2022_08_10_DLW209het_555syp1_488rad51_dapi_male5_stitched
37.217	86.0701	None	0.2014	male	syp3het	2022_08_10_DLW209het_555syp1_488rad51_dapi_male5_stitched
28.63	114.7	SYP1assembly	0.268393	male	syp3het	2022_08_10_DLW209het_555syp1_488rad51_dapi_male5_stitched
8.21702	122.917	SYP1assembly	0.28762	male	syp3het	2022_08_10_DLW209het_555syp1_488rad51_dapi_male5_stitched
14.1085	137.026	SYP1assembly	0.320633	male	syp3het	2022_08_10_DLW209het_555syp1_488rad51_dapi_male5_stitched
17.5131	154.539	SYPpartial	0.361613	male	syp3het	2022_08_10_DLW209het_555syp1_488rad51_dapi_male5_stitched
13.3661	167.905	SYP1	0.392889	male	syp3het	2022_08_10_DLW209het_555syp1_488rad51_dapi_male5_stitched
40.3906	208.295	SYP1	0.487401	male	syp3het	2022_08_10_DLW209het_555syp1_488rad51_dapi_male5_stitched
31.503	239.798	SYP1	0.561117	male	syp3het	2022_08_10_DLW209het_555syp1_488rad51_dapi_male5_stitched
11.5717	251.37	SYP1	0.588194	male	syp3het	2022_08_10_DLW209het_555syp1_488rad51_dapi_male5_stitched
12.4536	263.824	SYP1	0.617335	male	syp3het	2022_08_10_DLW209het_555syp1_488rad51_dapi_male5_stitched
6.809	270.633	SYP1	0.633268	male	syp3het	2022_08_10_DLW209het_555syp1_488rad51_dapi_male5_stitched
9.95967	280.592	SYP1	0.656573	male	syp3het	2022_08_10_DLW209het_555syp1_488rad51_dapi_male5_stitched
32.3493	312.942	SYP1	0.732268	male	syp3het	2022_08_10_DLW209het_555syp1_488rad51_dapi_male5_stitched
47.1163	360.058	SYP1	0.842518	male	syp3het	2022_08_10_DLW209het_555syp1_488rad51_dapi_male5_stitched
54.5589	414.617	SYP1	0.970183	male	syp3het	2022_08_10_DLW209het_555syp1_488rad51_dapi_male5_stitched
12.7424	427.359	SYP1	1	male	syp3het	2022_08_10_DLW209het_555syp1_488rad51_dapi_male5_stitched
45.2735	45.2735	None	0.114717	male	syp3het	2022_08_10_DLW209het_555syp1_488rad51_dapi_male6_stitched
33.9852	79.2588	None	0.20083	male	syp3het	2022_08_10_DLW209het_555syp1_488rad51_dapi_male6_stitched
14.4759	93.7347	None	0.23751	male	syp3het	2022_08_10_DLW209het_555syp1_488rad51_dapi_male6_stitched
16.141	109.876	SYP1assembly	0.278409	male	syp3het	2022_08_10_DLW209het_555syp1_488rad51_dapi_male6_stitched
10.962	120.838	SYP1assembly	0.306185	male	syp3het	2022_08_10_DLW209het_555syp1_488rad51_dapi_male6_stitched
27.7488	148.586	SYP1assembly	0.376497	male	syp3het	2022_08_10_DLW209het_555syp1_488rad51_dapi_male6_stitched
7.72736	156.314	SYPpartial	0.396077	male	syp3het	2022_08_10_DLW209het_555syp1_488rad51_dapi_male6_stitched
9.45953	165.773	SYP1	0.420046	male	syp3het	2022_08_10_DLW209het_555syp1_488rad51_dapi_male6_stitched
32.7122	198.486	SYP1	0.502934	male	syp3het	2022_08_10_DLW209het_555syp1_488rad51_dapi_male6_stitched
32.2541	230.74	SYP1	0.584661	male	syp3het	2022_08_10_DLW209het_555syp1_488rad51_dapi_male6_stitched
26.1158	256.855	SYP1	0.650835	male	syp3het	2022_08_10_DLW209het_555syp1_488rad51_dapi_male6_stitched
27.8078	284.663	SYP1	0.721296	male	syp3het	2022_08_10_DLW209het_555syp1_488rad51_dapi_male6_stitched
59.3315	343.995	SYP1	0.871633	male	syp3het	2022_08_10_DLW209het_555syp1_488rad51_dapi_male6_stitched
50.6607	394.655	SYP1	1	male	syp3het	2022_08_10_DLW209het_555syp1_488rad51_dapi_male6_stitched
34.7404	34.7404	None	0.102486	herm	WT	2022_08_10_NSV129_555syp1_488rad51_dapi_herm1_stitched
18.2243	52.9647	None	0.156249	herm	WT	2022_08_10_NSV129_555syp1_488rad51_dapi_herm1_stitched
15.766	68.7307	SYP1assembly	0.20276	herm	WT	2022_08_10_NSV129_555syp1_488rad51_dapi_herm1_stitched
11.8365	80.5672	SYP1assembly	0.237678	herm	WT	2022_08_10_NSV129_555syp1_488rad51_dapi_herm1_stitched
10.7613	91.3285	SYP1assembly	0.269424	herm	WT	2022_08_10_NSV129_555syp1_488rad51_dapi_herm1_stitched
14.4252	105.754	SYPpartial	0.31198	herm	WT	2022_08_10_NSV129_555syp1_488rad51_dapi_herm1_stitched
52.461	158.215	SYP1	0.466743	herm	WT	2022_08_10_NSV129_555syp1_488rad51_dapi_herm1_stitched
63.1566	221.371	SYP1	0.653058	herm	WT	2022_08_10_NSV129_555syp1_488rad51_dapi_herm1_stitched
26.0935	247.465	SYP1	0.730036	herm	WT	2022_08_10_NSV129_555syp1_488rad51_dapi_herm1_stitched
56.7058	304.171	SYP1	0.897321	herm	WT	2022_08_10_NSV129_555syp1_488rad51_dapi_herm1_stitched
34.8057	338.976	SYP1	1	herm	WT	2022_08_10_NSV129_555syp1_488rad51_dapi_herm1_stitched
24.1592	24.1592	None	0.063369	herm	WT	2022_08_10_NSV129_555syp1_488rad51_dapi_herm2_stitched
10.3538	34.513	None	0.0905268	herm	WT	2022_08_10_NSV129_555syp1_488rad51_dapi_herm2_stitched
20.6293	55.1422	None	0.144637	herm	WT	2022_08_10_NSV129_555syp1_488rad51_dapi_herm2_stitched
16.6035	71.7457	None	0.188187	herm	WT	2022_08_10_NSV129_555syp1_488rad51_dapi_herm2_stitched
8.68442	80.4301	SYP1assembly	0.210967	herm	WT	2022_08_10_NSV129_555syp1_488rad51_dapi_herm2_stitched
15.8154	96.2455	SYP1assembly	0.25245	herm	WT	2022_08_10_NSV129_555syp1_488rad51_dapi_herm2_stitched
25.5603	121.806	SYP1assembly	0.319494	herm	WT	2022_08_10_NSV129_555syp1_488rad51_dapi_herm2_stitched
13.5798	135.386	SYPpartial	0.355114	herm	WT	2022_08_10_NSV129_555syp1_488rad51_dapi_herm2_stitched
7.8838	143.269	SYPpartial	0.375793	herm	WT	2022_08_10_NSV129_555syp1_488rad51_dapi_herm2_stitched
13.9887	157.258	SYP1	0.412485	herm	WT	2022_08_10_NSV129_555syp1_488rad51_dapi_herm2_stitched
39.4238	196.682	SYP1	0.515893	herm	WT	2022_08_10_NSV129_555syp1_488rad51_dapi_herm2_stitched
23.8383	220.52	SYP1	0.57842	herm	WT	2022_08_10_NSV129_555syp1_488rad51_dapi_herm2_stitched
52.7672	273.288	SYP1	0.716827	herm	WT	2022_08_10_NSV129_555syp1_488rad51_dapi_herm2_stitched
29.9532	303.241	SYP1	0.795394	herm	WT	2022_08_10_NSV129_555syp1_488rad51_dapi_herm2_stitched
23.057	326.298	SYP1	0.855872	herm	WT	2022_08_10_NSV129_555syp1_488rad51_dapi_herm2_stitched
36.0639	362.362	SYP1	0.950467	herm	WT	2022_08_10_NSV129_555syp1_488rad51_dapi_herm2_stitched
18.8843	381.246	SYP1	1	herm	WT	2022_08_10_NSV129_555syp1_488rad51_dapi_herm2_stitched
23.0959	23.0959	None	0.0538396	herm	WT	2022_08_10_NSV129_555syp1_488rad51_dapi_herm4_stitched
9.53293	32.6288	None	0.0760621	herm	WT	2022_08_10_NSV129_555syp1_488rad51_dapi_herm4_stitched
12.4202	45.0489	None	0.105015	herm	WT	2022_08_10_NSV129_555syp1_488rad51_dapi_herm4_stitched
13.9201	58.969	None	0.137465	herm	WT	2022_08_10_NSV129_555syp1_488rad51_dapi_herm4_stitched
22.4743	81.4434	None	0.189856	herm	WT	2022_08_10_NSV129_555syp1_488rad51_dapi_herm4_stitched
25.0648	106.508	SYP1assembly	0.248285	herm	WT	2022_08_10_NSV129_555syp1_488rad51_dapi_herm4_stitched
10.4339	116.942	SYP1assembly	0.272608	herm	WT	2022_08_10_NSV129_555syp1_488rad51_dapi_herm4_stitched
37.7476	154.69	SYP1assembly	0.360603	herm	WT	2022_08_10_NSV129_555syp1_488rad51_dapi_herm4_stitched
8.59501	163.285	SYPpartial	0.380639	herm	WT	2022_08_10_NSV129_555syp1_488rad51_dapi_herm4_stitched
34.8192	198.104	SYP1	0.461807	herm	WT	2022_08_10_NSV129_555syp1_488rad51_dapi_herm4_stitched
23.027	221.131	SYP1	0.515486	herm	WT	2022_08_10_NSV129_555syp1_488rad51_dapi_herm4_stitched
34.7051	255.836	SYP1	0.596389	herm	WT	2022_08_10_NSV129_555syp1_488rad51_dapi_herm4_stitched
66.901	322.737	SYP1	0.752344	herm	WT	2022_08_10_NSV129_555syp1_488rad51_dapi_herm4_stitched
106.238	428.975	SYP1	1	herm	WT	2022_08_10_NSV129_555syp1_488rad51_dapi_herm4_stitched
31.7139	31.7139	None	0.0846587	herm	WT	2022_08_10_NSV129_555syp1_488rad51_dapi_herm5_stitched
26.6458	58.3597	None	0.155789	herm	WT	2022_08_10_NSV129_555syp1_488rad51_dapi_herm5_stitched
8.64084	67.0005	None	0.178855	herm	WT	2022_08_10_NSV129_555syp1_488rad51_dapi_herm5_stitched
37.7871	104.788	SYP1assembly	0.279726	herm	WT	2022_08_10_NSV129_555syp1_488rad51_dapi_herm5_stitched
17.17	121.958	SYP1assembly	0.32556	herm	WT	2022_08_10_NSV129_555syp1_488rad51_dapi_herm5_stitched
30.7434	152.701	SYP1assembly	0.407628	herm	WT	2022_08_10_NSV129_555syp1_488rad51_dapi_herm5_stitched
23.1338	175.835	SYPpartial	0.469383	herm	WT	2022_08_10_NSV129_555syp1_488rad51_dapi_herm5_stitched
57.3098	233.145	SYP1	0.622369	herm	WT	2022_08_10_NSV129_555syp1_488rad51_dapi_herm5_stitched
48.2108	281.355	SYP1	0.751065	herm	WT	2022_08_10_NSV129_555syp1_488rad51_dapi_herm5_stitched
54.6286	335.984	SYP1	0.896894	herm	WT	2022_08_10_NSV129_555syp1_488rad51_dapi_herm5_stitched
22.3821	358.366	SYP1	0.956642	herm	WT	2022_08_10_NSV129_555syp1_488rad51_dapi_herm5_stitched
16.2424	374.608	SYP1	1	herm	WT	2022_08_10_NSV129_555syp1_488rad51_dapi_herm5_stitched
53.512	53.512	None	0.150152	male	WT	2022_08_10_NSV129_555syp1_488rad51_dapi_male1_stitched
29.9628	83.4748	None	0.234227	male	WT	2022_08_10_NSV129_555syp1_488rad51_dapi_male1_stitched
24.0243	107.499	SYP1assembly	0.301638	male	WT	2022_08_10_NSV129_555syp1_488rad51_dapi_male1_stitched
20.4822	127.981	SYP1assembly	0.35911	male	WT	2022_08_10_NSV129_555syp1_488rad51_dapi_male1_stitched
18.775	146.756	SYP1assembly	0.411792	male	WT	2022_08_10_NSV129_555syp1_488rad51_dapi_male1_stitched
18.1752	164.932	SYPpartial	0.462791	male	WT	2022_08_10_NSV129_555syp1_488rad51_dapi_male1_stitched
14.126	179.058	SYP1	0.502428	male	WT	2022_08_10_NSV129_555syp1_488rad51_dapi_male1_stitched
20.1404	199.198	SYP1	0.558941	male	WT	2022_08_10_NSV129_555syp1_488rad51_dapi_male1_stitched
14.376	213.574	SYP1	0.59928	male	WT	2022_08_10_NSV129_555syp1_488rad51_dapi_male1_stitched
11.2146	224.789	SYP1	0.630747	male	WT	2022_08_10_NSV129_555syp1_488rad51_dapi_male1_stitched
20.684	245.473	SYP1	0.688786	male	WT	2022_08_10_NSV129_555syp1_488rad51_dapi_male1_stitched
19.4539	264.927	SYP1	0.743373	male	WT	2022_08_10_NSV129_555syp1_488rad51_dapi_male1_stitched
35.4946	300.421	SYP1	0.842969	male	WT	2022_08_10_NSV129_555syp1_488rad51_dapi_male1_stitched
22.2594	322.681	SYP1	0.905428	male	WT	2022_08_10_NSV129_555syp1_488rad51_dapi_male1_stitched
33.7039	356.385	SYP1	1	male	WT	2022_08_10_NSV129_555syp1_488rad51_dapi_male1_stitched
64.075	64.075	None	0.171543	male	WT	2022_08_10_NSV129_555syp1_488rad51_dapi_male2_stitched
37.6435	101.718	None	0.272323	male	WT	2022_08_10_NSV129_555syp1_488rad51_dapi_male2_stitched
31.9246	133.643	SYP1assembly	0.357792	male	WT	2022_08_10_NSV129_555syp1_488rad51_dapi_male2_stitched
11.0693	144.712	SYP1assembly	0.387427	male	WT	2022_08_10_NSV129_555syp1_488rad51_dapi_male2_stitched
21.9681	166.68	SYP1assembly	0.44624	male	WT	2022_08_10_NSV129_555syp1_488rad51_dapi_male2_stitched
25.0308	191.711	SYPpartial	0.513253	male	WT	2022_08_10_NSV129_555syp1_488rad51_dapi_male2_stitched
6.31493	198.026	SYPpartial	0.530159	male	WT	2022_08_10_NSV129_555syp1_488rad51_dapi_male2_stitched
37.586	235.612	SYP1	0.630785	male	WT	2022_08_10_NSV129_555syp1_488rad51_dapi_male2_stitched
49.7637	285.376	SYP1	0.764014	male	WT	2022_08_10_NSV129_555syp1_488rad51_dapi_male2_stitched
31.3982	316.774	SYP1	0.848074	male	WT	2022_08_10_NSV129_555syp1_488rad51_dapi_male2_stitched
19.6986	336.473	SYP1	0.900811	male	WT	2022_08_10_NSV129_555syp1_488rad51_dapi_male2_stitched
37.0492	373.522	SYP1	1	male	WT	2022_08_10_NSV129_555syp1_488rad51_dapi_male2_stitched
25.6435	25.6435	None	0.0804919	male	WT	2022_08_10_NSV129_555syp1_488rad51_dapi_male3_stitched
21.0463	46.6898	None	0.146554	male	WT	2022_08_10_NSV129_555syp1_488rad51_dapi_male3_stitched
18.9602	65.65	None	0.206068	male	WT	2022_08_10_NSV129_555syp1_488rad51_dapi_male3_stitched
18.665	84.315	None	0.264655	male	WT	2022_08_10_NSV129_555syp1_488rad51_dapi_male3_stitched
23.2585	107.574	SYP1assembly	0.337661	male	WT	2022_08_10_NSV129_555syp1_488rad51_dapi_male3_stitched
10.6908	118.264	SYP1assembly	0.371218	male	WT	2022_08_10_NSV129_555syp1_488rad51_dapi_male3_stitched
18.8409	137.105	SYP1assembly	0.430357	male	WT	2022_08_10_NSV129_555syp1_488rad51_dapi_male3_stitched
17.4873	154.592	SYPpartial	0.485248	male	WT	2022_08_10_NSV129_555syp1_488rad51_dapi_male3_stitched
19.4306	174.023	SYP1	0.546238	male	WT	2022_08_10_NSV129_555syp1_488rad51_dapi_male3_stitched
18.0135	192.037	SYP1	0.602781	male	WT	2022_08_10_NSV129_555syp1_488rad51_dapi_male3_stitched
26.7139	218.751	SYP1	0.686633	male	WT	2022_08_10_NSV129_555syp1_488rad51_dapi_male3_stitched
51.4348	270.185	SYP1	0.84808	male	WT	2022_08_10_NSV129_555syp1_488rad51_dapi_male3_stitched
48.3993	318.585	SYP1	1	male	WT	2022_08_10_NSV129_555syp1_488rad51_dapi_male3_stitched
55.0633	55.0633	None	0.164013	male	WT	2022_08_10_NSV129_555syp1_488rad51_dapi_male4_stitched
30.3354	85.3986	None	0.25437	male	WT	2022_08_10_NSV129_555syp1_488rad51_dapi_male4_stitched
27.497	112.896	SYP1assembly	0.336274	male	WT	2022_08_10_NSV129_555syp1_488rad51_dapi_male4_stitched
7.42074	120.316	SYP1assembly	0.358377	male	WT	2022_08_10_NSV129_555syp1_488rad51_dapi_male4_stitched
24.8133	145.13	SYP1assembly	0.432287	male	WT	2022_08_10_NSV129_555syp1_488rad51_dapi_male4_stitched
12.6512	157.781	SYPpartial	0.46997	male	WT	2022_08_10_NSV129_555syp1_488rad51_dapi_male4_stitched
19.4988	177.28	SYP1	0.52805	male	WT	2022_08_10_NSV129_555syp1_488rad51_dapi_male4_stitched
16.5336	193.813	SYP1	0.577297	male	WT	2022_08_10_NSV129_555syp1_488rad51_dapi_male4_stitched
22.877	216.69	SYP1	0.645439	male	WT	2022_08_10_NSV129_555syp1_488rad51_dapi_male4_stitched
32.5181	249.208	SYP1	0.742298	male	WT	2022_08_10_NSV129_555syp1_488rad51_dapi_male4_stitched
38.9569	288.165	SYP1	0.858336	male	WT	2022_08_10_NSV129_555syp1_488rad51_dapi_male4_stitched
47.5601	335.726	SYP1	1	male	WT	2022_08_10_NSV129_555syp1_488rad51_dapi_male4_stitched
