# Supplementary material for: Sexual dimorphic regulation of recombination by the synaptonemal complex in C. elegans
Source: eLife. 2023 Oct 5;12:e84538. doi: 10.7554/eLife.84538 (PMC10611432; doi:10.7554/eLife.84538)
Supplement: Figure 5—figure supplement 2—source data 1. [file elife-84538-fig5-figsupp2-data1.xlsx]

## Sheet: Sheet1
Explanation of the column identifiers: (1) Length shows the length between individual measured segments; (2) cum_length is the progressive cumulative length of the segments in one germline; (3) DSB2_stain displays the categories of DSB-2 staining: staining was present (DSB2) and last nucleus with DSB-2 staining (DSB2_stragler); (4) length_normd is the normalized germline length from PMT (pre-meio…
length	cum_length	DSB2_stain	length_normd	Sex	Genotype	image_name
92.254	92.254	None	0.191313	herm	syp3het	2022_08_05_DLW196het_555dsb2_488gfpcosa1_dapi_herm1_stitched
41.7278	133.982	None	0.277846	herm	syp3het	2022_08_05_DLW196het_555dsb2_488gfpcosa1_dapi_herm1_stitched
17.0224	151.004	None	0.313146	herm	syp3het	2022_08_05_DLW196het_555dsb2_488gfpcosa1_dapi_herm1_stitched
23.821	174.825	DSB2	0.362545	herm	syp3het	2022_08_05_DLW196het_555dsb2_488gfpcosa1_dapi_herm1_stitched
32.6923	207.518	DSB2	0.430341	herm	syp3het	2022_08_05_DLW196het_555dsb2_488gfpcosa1_dapi_herm1_stitched
53.8701	261.388	DSB2	0.542055	herm	syp3het	2022_08_05_DLW196het_555dsb2_488gfpcosa1_dapi_herm1_stitched
68.3065	329.694	DSB2	0.683706	herm	syp3het	2022_08_05_DLW196het_555dsb2_488gfpcosa1_dapi_herm1_stitched
33.5746	363.269	DSB2	0.753332	herm	syp3het	2022_08_05_DLW196het_555dsb2_488gfpcosa1_dapi_herm1_stitched
68.8294	432.098	DSB2_stragler	0.896067	herm	syp3het	2022_08_05_DLW196het_555dsb2_488gfpcosa1_dapi_herm1_stitched
50.118	482.216	None	1	herm	syp3het	2022_08_05_DLW196het_555dsb2_488gfpcosa1_dapi_herm1_stitched
24.4825	24.4825	None	0.0507964	herm	syp3het	2022_08_05_DLW196het_555dsb2_488gfpcosa1_dapi_herm2_stitched
10.6849	35.1674	None	0.0729655	herm	syp3het	2022_08_05_DLW196het_555dsb2_488gfpcosa1_dapi_herm2_stitched
15.2935	50.4609	None	0.104697	herm	syp3het	2022_08_05_DLW196het_555dsb2_488gfpcosa1_dapi_herm2_stitched
17.1524	67.6133	None	0.140284	herm	syp3het	2022_08_05_DLW196het_555dsb2_488gfpcosa1_dapi_herm2_stitched
47.3705	114.984	None	0.238569	herm	syp3het	2022_08_05_DLW196het_555dsb2_488gfpcosa1_dapi_herm2_stitched
12.02	127.004	None	0.263508	herm	syp3het	2022_08_05_DLW196het_555dsb2_488gfpcosa1_dapi_herm2_stitched
20.4178	147.422	None	0.305871	herm	syp3het	2022_08_05_DLW196het_555dsb2_488gfpcosa1_dapi_herm2_stitched
12.1317	159.553	None	0.331042	herm	syp3het	2022_08_05_DLW196het_555dsb2_488gfpcosa1_dapi_herm2_stitched
13.3252	172.878	None	0.358689	herm	syp3het	2022_08_05_DLW196het_555dsb2_488gfpcosa1_dapi_herm2_stitched
12.1407	185.019	DSB2	0.383879	herm	syp3het	2022_08_05_DLW196het_555dsb2_488gfpcosa1_dapi_herm2_stitched
13.0926	198.112	DSB2	0.411044	herm	syp3het	2022_08_05_DLW196het_555dsb2_488gfpcosa1_dapi_herm2_stitched
62.8194	260.931	DSB2	0.541382	herm	syp3het	2022_08_05_DLW196het_555dsb2_488gfpcosa1_dapi_herm2_stitched
111.81	372.741	DSB2	0.773365	herm	syp3het	2022_08_05_DLW196het_555dsb2_488gfpcosa1_dapi_herm2_stitched
29.9884	402.729	DSB2_stragler	0.835586	herm	syp3het	2022_08_05_DLW196het_555dsb2_488gfpcosa1_dapi_herm2_stitched
19.7299	422.459	None	0.876521	herm	syp3het	2022_08_05_DLW196het_555dsb2_488gfpcosa1_dapi_herm2_stitched
29.3096	451.769	None	0.937333	herm	syp3het	2022_08_05_DLW196het_555dsb2_488gfpcosa1_dapi_herm2_stitched
11.9548	463.724	None	0.962137	herm	syp3het	2022_08_05_DLW196het_555dsb2_488gfpcosa1_dapi_herm2_stitched
18.2488	481.973	None	1	herm	syp3het	2022_08_05_DLW196het_555dsb2_488gfpcosa1_dapi_herm2_stitched
41.0389	41.0389	None	0.106521	herm	syp3het	2022_08_05_DLW196het_555dsb2_488gfpcosa1_dapi_herm3_stitched
23.6441	64.683	None	0.167892	herm	syp3het	2022_08_05_DLW196het_555dsb2_488gfpcosa1_dapi_herm3_stitched
17.6825	82.3656	None	0.213789	herm	syp3het	2022_08_05_DLW196het_555dsb2_488gfpcosa1_dapi_herm3_stitched
34.3768	116.742	DSB2	0.303018	herm	syp3het	2022_08_05_DLW196het_555dsb2_488gfpcosa1_dapi_herm3_stitched
59.522	176.264	DSB2	0.457514	herm	syp3het	2022_08_05_DLW196het_555dsb2_488gfpcosa1_dapi_herm3_stitched
62.6762	238.941	DSB2	0.620197	herm	syp3het	2022_08_05_DLW196het_555dsb2_488gfpcosa1_dapi_herm3_stitched
29.6192	268.56	DSB2	0.697077	herm	syp3het	2022_08_05_DLW196het_555dsb2_488gfpcosa1_dapi_herm3_stitched
44.8802	313.44	DSB2_stragler	0.813569	herm	syp3het	2022_08_05_DLW196het_555dsb2_488gfpcosa1_dapi_herm3_stitched
71.8256	385.265	None	1	herm	syp3het	2022_08_05_DLW196het_555dsb2_488gfpcosa1_dapi_herm3_stitched
59.4314	59.4314	None	0.132025	herm	syp3het	2022_08_05_DLW196het_555dsb2_488gfpcosa1_dapi_herm4_stitched
50.7134	110.145	None	0.244684	herm	syp3het	2022_08_05_DLW196het_555dsb2_488gfpcosa1_dapi_herm4_stitched
32.2002	142.345	None	0.316216	herm	syp3het	2022_08_05_DLW196het_555dsb2_488gfpcosa1_dapi_herm4_stitched
34.013	176.358	DSB2	0.391775	herm	syp3het	2022_08_05_DLW196het_555dsb2_488gfpcosa1_dapi_herm4_stitched
10.9004	187.258	DSB2	0.41599	herm	syp3het	2022_08_05_DLW196het_555dsb2_488gfpcosa1_dapi_herm4_stitched
32.2471	219.506	DSB2	0.487626	herm	syp3het	2022_08_05_DLW196het_555dsb2_488gfpcosa1_dapi_herm4_stitched
36.8572	256.363	DSB2	0.569504	herm	syp3het	2022_08_05_DLW196het_555dsb2_488gfpcosa1_dapi_herm4_stitched
59.6488	316.012	DSB2	0.702012	herm	syp3het	2022_08_05_DLW196het_555dsb2_488gfpcosa1_dapi_herm4_stitched
21.2901	337.302	DSB2_stragler	0.749308	herm	syp3het	2022_08_05_DLW196het_555dsb2_488gfpcosa1_dapi_herm4_stitched
18.5113	355.813	DSB2_stragler	0.79043	herm	syp3het	2022_08_05_DLW196het_555dsb2_488gfpcosa1_dapi_herm4_stitched
41.7519	397.565	DSB2_stragler	0.883181	herm	syp3het	2022_08_05_DLW196het_555dsb2_488gfpcosa1_dapi_herm4_stitched
29.5307	427.096	None	0.948783	herm	syp3het	2022_08_05_DLW196het_555dsb2_488gfpcosa1_dapi_herm4_stitched
23.0555	450.151	None	1	herm	syp3het	2022_08_05_DLW196het_555dsb2_488gfpcosa1_dapi_herm4_stitched
71.361	71.361	None	0.164654	herm	syp3het	2022_08_05_DLW196het_555dsb2_488gfpcosa1_dapi_herm5_stitched
46.8986	118.26	None	0.272865	herm	syp3het	2022_08_05_DLW196het_555dsb2_488gfpcosa1_dapi_herm5_stitched
17.3828	135.642	None	0.312973	herm	syp3het	2022_08_05_DLW196het_555dsb2_488gfpcosa1_dapi_herm5_stitched
53.8688	189.511	DSB2	0.437267	herm	syp3het	2022_08_05_DLW196het_555dsb2_488gfpcosa1_dapi_herm5_stitched
45.189	234.7	DSB2	0.541533	herm	syp3het	2022_08_05_DLW196het_555dsb2_488gfpcosa1_dapi_herm5_stitched
74.5165	309.217	DSB2	0.713468	herm	syp3het	2022_08_05_DLW196het_555dsb2_488gfpcosa1_dapi_herm5_stitched
35.9865	345.203	DSB2_stragler	0.796501	herm	syp3het	2022_08_05_DLW196het_555dsb2_488gfpcosa1_dapi_herm5_stitched
41.4016	386.605	None	0.892028	herm	syp3het	2022_08_05_DLW196het_555dsb2_488gfpcosa1_dapi_herm5_stitched
46.7949	433.4	None	1	herm	syp3het	2022_08_05_DLW196het_555dsb2_488gfpcosa1_dapi_herm5_stitched
38.1952	38.1952	None	0.0919501	herm	syp2het	2022_08_05_DLW195het_555dsb2_488gfpcosa1_dapi_herm2_stitched
23.6834	61.8786	None	0.148965	herm	syp2het	2022_08_05_DLW195het_555dsb2_488gfpcosa1_dapi_herm2_stitched
20.8397	82.7183	None	0.199134	herm	syp2het	2022_08_05_DLW195het_555dsb2_488gfpcosa1_dapi_herm2_stitched
26.118	108.836	None	0.26201	herm	syp2het	2022_08_05_DLW195het_555dsb2_488gfpcosa1_dapi_herm2_stitched
20.2204	129.057	None	0.310688	herm	syp2het	2022_08_05_DLW195het_555dsb2_488gfpcosa1_dapi_herm2_stitched
27.8367	156.894	DSB2	0.377701	herm	syp2het	2022_08_05_DLW195het_555dsb2_488gfpcosa1_dapi_herm2_stitched
47.0589	203.952	DSB2	0.490989	herm	syp2het	2022_08_05_DLW195het_555dsb2_488gfpcosa1_dapi_herm2_stitched
42.4884	246.441	DSB2	0.593275	herm	syp2het	2022_08_05_DLW195het_555dsb2_488gfpcosa1_dapi_herm2_stitched
43.6016	290.042	DSB2	0.69824	herm	syp2het	2022_08_05_DLW195het_555dsb2_488gfpcosa1_dapi_herm2_stitched
54.9323	344.975	DSB2_stragler	0.830482	herm	syp2het	2022_08_05_DLW195het_555dsb2_488gfpcosa1_dapi_herm2_stitched
70.416	415.391	None	1	herm	syp2het	2022_08_05_DLW195het_555dsb2_488gfpcosa1_dapi_herm2_stitched
43.1808	43.1808	None	0.126022	herm	syp2het	2022_08_05_DLW195het_555dsb2_488gfpcosa1_dapi_herm3_stitched
41.3058	84.4866	None	0.246573	herm	syp2het	2022_08_05_DLW195het_555dsb2_488gfpcosa1_dapi_herm3_stitched
16.8857	101.372	None	0.295853	herm	syp2het	2022_08_05_DLW195het_555dsb2_488gfpcosa1_dapi_herm3_stitched
45.1742	146.546	DSB2	0.427693	herm	syp2het	2022_08_05_DLW195het_555dsb2_488gfpcosa1_dapi_herm3_stitched
56.0971	202.644	DSB2	0.591412	herm	syp2het	2022_08_05_DLW195het_555dsb2_488gfpcosa1_dapi_herm3_stitched
25.3299	227.973	DSB2	0.665337	herm	syp2het	2022_08_05_DLW195het_555dsb2_488gfpcosa1_dapi_herm3_stitched
23.681	251.655	DSB2	0.73445	herm	syp2het	2022_08_05_DLW195het_555dsb2_488gfpcosa1_dapi_herm3_stitched
35.0725	286.727	DSB2_stragler	0.836808	herm	syp2het	2022_08_05_DLW195het_555dsb2_488gfpcosa1_dapi_herm3_stitched
26.3363	313.063	None	0.91367	herm	syp2het	2022_08_05_DLW195het_555dsb2_488gfpcosa1_dapi_herm3_stitched
29.5803	342.644	None	1	herm	syp2het	2022_08_05_DLW195het_555dsb2_488gfpcosa1_dapi_herm3_stitched
57.5257	57.5257	None	0.138811	herm	syp2het	2022_08_05_DLW195het_555dsb2_488gfpcosa1_dapi_herm5_stitched
22.8751	80.4008	None	0.194009	herm	syp2het	2022_08_05_DLW195het_555dsb2_488gfpcosa1_dapi_herm5_stitched
31.6174	112.018	None	0.270302	herm	syp2het	2022_08_05_DLW195het_555dsb2_488gfpcosa1_dapi_herm5_stitched
48.2539	160.272	None	0.38674	herm	syp2het	2022_08_05_DLW195het_555dsb2_488gfpcosa1_dapi_herm5_stitched
38.6952	198.967	DSB2	0.480112	herm	syp2het	2022_08_05_DLW195het_555dsb2_488gfpcosa1_dapi_herm5_stitched
34.1506	233.118	DSB2	0.562519	herm	syp2het	2022_08_05_DLW195het_555dsb2_488gfpcosa1_dapi_herm5_stitched
14.1694	247.287	DSB2	0.59671	herm	syp2het	2022_08_05_DLW195het_555dsb2_488gfpcosa1_dapi_herm5_stitched
70.7695	318.057	DSB2	0.767478	herm	syp2het	2022_08_05_DLW195het_555dsb2_488gfpcosa1_dapi_herm5_stitched
42.3881	360.445	DSB2_stragler	0.869761	herm	syp2het	2022_08_05_DLW195het_555dsb2_488gfpcosa1_dapi_herm5_stitched
23.1002	383.545	None	0.925503	herm	syp2het	2022_08_05_DLW195het_555dsb2_488gfpcosa1_dapi_herm5_stitched
30.873	414.418	None	1	herm	syp2het	2022_08_05_DLW195het_555dsb2_488gfpcosa1_dapi_herm5_stitched
75.0304	75.0304	None	0.203825	herm	syp2het	2022_08_05_DLW195het_555dsb2_488gfpcosa1_dapi_herm6_stitched
7.66138	82.6918	None	0.224638	herm	syp2het	2022_08_05_DLW195het_555dsb2_488gfpcosa1_dapi_herm6_stitched
50.4016	133.093	None	0.361557	herm	syp2het	2022_08_05_DLW195het_555dsb2_488gfpcosa1_dapi_herm6_stitched
13.5708	146.664	DSB2	0.398423	herm	syp2het	2022_08_05_DLW195het_555dsb2_488gfpcosa1_dapi_herm6_stitched
78.7687	225.433	DSB2	0.612404	herm	syp2het	2022_08_05_DLW195het_555dsb2_488gfpcosa1_dapi_herm6_stitched
29.0347	254.468	DSB2	0.691279	herm	syp2het	2022_08_05_DLW195het_555dsb2_488gfpcosa1_dapi_herm6_stitched
12.6986	267.166	DSB2	0.725776	herm	syp2het	2022_08_05_DLW195het_555dsb2_488gfpcosa1_dapi_herm6_stitched
13.6619	280.828	DSB2	0.762889	herm	syp2het	2022_08_05_DLW195het_555dsb2_488gfpcosa1_dapi_herm6_stitched
18.5994	299.427	DSB2_stragler	0.813416	herm	syp2het	2022_08_05_DLW195het_555dsb2_488gfpcosa1_dapi_herm6_stitched
17.8528	317.28	DSB2_stragler	0.861914	herm	syp2het	2022_08_05_DLW195het_555dsb2_488gfpcosa1_dapi_herm6_stitched
19.4167	336.697	DSB2_stragler	0.914661	herm	syp2het	2022_08_05_DLW195het_555dsb2_488gfpcosa1_dapi_herm6_stitched
31.4143	368.111	None	1	herm	syp2het	2022_08_05_DLW195het_555dsb2_488gfpcosa1_dapi_herm6_stitched
55.6833	55.6833	None	0.141252	herm	syp2het	2022_08_05_DLW195het_555dsb2_488gfpcosa1_dapi_herm7_stitched
29.8729	85.5563	None	0.217031	herm	syp2het	2022_08_05_DLW195het_555dsb2_488gfpcosa1_dapi_herm7_stitched
30.0188	115.575	None	0.29318	herm	syp2het	2022_08_05_DLW195het_555dsb2_488gfpcosa1_dapi_herm7_stitched
44.3242	159.899	DSB2	0.405617	herm	syp2het	2022_08_05_DLW195het_555dsb2_488gfpcosa1_dapi_herm7_stitched
72.5859	232.485	DSB2	0.589746	herm	syp2het	2022_08_05_DLW195het_555dsb2_488gfpcosa1_dapi_herm7_stitched
54.1395	286.625	DSB2	0.727082	herm	syp2het	2022_08_05_DLW195het_555dsb2_488gfpcosa1_dapi_herm7_stitched
47.3484	333.973	DSB2_stragler	0.84719	herm	syp2het	2022_08_05_DLW195het_555dsb2_488gfpcosa1_dapi_herm7_stitched
60.2394	394.212	None	1	herm	syp2het	2022_08_05_DLW195het_555dsb2_488gfpcosa1_dapi_herm7_stitched
55.4662	55.4662	None	0.198061	herm	syp2het	2022_08_05_DLW195het_555dsb2_488gfpcosa1_dapi_herm9_stitched
18.327	73.7932	None	0.263504	herm	syp2het	2022_08_05_DLW195het_555dsb2_488gfpcosa1_dapi_herm9_stitched
13.0064	86.7997	None	0.309948	herm	syp2het	2022_08_05_DLW195het_555dsb2_488gfpcosa1_dapi_herm9_stitched
22.8158	109.615	DSB2	0.39142	herm	syp2het	2022_08_05_DLW195het_555dsb2_488gfpcosa1_dapi_herm9_stitched
43.3259	152.941	DSB2	0.54613	herm	syp2het	2022_08_05_DLW195het_555dsb2_488gfpcosa1_dapi_herm9_stitched
31.3496	184.291	DSB2	0.658074	herm	syp2het	2022_08_05_DLW195het_555dsb2_488gfpcosa1_dapi_herm9_stitched
36.9838	221.275	DSB2	0.790138	herm	syp2het	2022_08_05_DLW195het_555dsb2_488gfpcosa1_dapi_herm9_stitched
31.0951	252.37	DSB2_stragler	0.901173	herm	syp2het	2022_08_05_DLW195het_555dsb2_488gfpcosa1_dapi_herm9_stitched
15.5452	267.915	None	0.956683	herm	syp2het	2022_08_05_DLW195het_555dsb2_488gfpcosa1_dapi_herm9_stitched
12.1308	280.046	None	1	herm	syp2het	2022_08_05_DLW195het_555dsb2_488gfpcosa1_dapi_herm9_stitched
37.9014	37.9014	None	0.102314	herm	syp2het	2022_08_05_DLW195het_555dsb2_488gfpcosa1_dapi_herm10_stitched
26.1135	64.0149	None	0.172807	herm	syp2het	2022_08_05_DLW195het_555dsb2_488gfpcosa1_dapi_herm10_stitched
25.024	89.0389	None	0.240358	herm	syp2het	2022_08_05_DLW195het_555dsb2_488gfpcosa1_dapi_herm10_stitched
24.1914	113.23	DSB2	0.305662	herm	syp2het	2022_08_05_DLW195het_555dsb2_488gfpcosa1_dapi_herm10_stitched
46.2691	159.499	DSB2	0.430565	herm	syp2het	2022_08_05_DLW195het_555dsb2_488gfpcosa1_dapi_herm10_stitched
36.4816	195.981	DSB2	0.529046	herm	syp2het	2022_08_05_DLW195het_555dsb2_488gfpcosa1_dapi_herm10_stitched
48.6523	244.633	DSB2	0.660381	herm	syp2het	2022_08_05_DLW195het_555dsb2_488gfpcosa1_dapi_herm10_stitched
50.8925	295.526	DSB2_stragler	0.797764	herm	syp2het	2022_08_05_DLW195het_555dsb2_488gfpcosa1_dapi_herm10_stitched
33.2729	328.799	DSB2_stragler	0.887583	herm	syp2het	2022_08_05_DLW195het_555dsb2_488gfpcosa1_dapi_herm10_stitched
26.205	355.004	DSB2_stragler	0.958323	herm	syp2het	2022_08_05_DLW195het_555dsb2_488gfpcosa1_dapi_herm10_stitched
15.4389	370.443	None	1	herm	syp2het	2022_08_05_DLW195het_555dsb2_488gfpcosa1_dapi_herm10_stitched
50.2133	50.2133	None	0.138172	herm	syp2het	2022_08_05_DLW195het_555dsb2_488gfpcosa1_dapi_herm12_stitched
34.5019	84.7152	None	0.233111	herm	syp2het	2022_08_05_DLW195het_555dsb2_488gfpcosa1_dapi_herm12_stitched
22.9986	107.714	None	0.296396	herm	syp2het	2022_08_05_DLW195het_555dsb2_488gfpcosa1_dapi_herm12_stitched
40.1981	147.912	DSB2	0.407009	herm	syp2het	2022_08_05_DLW195het_555dsb2_488gfpcosa1_dapi_herm12_stitched
45.7413	193.653	DSB2	0.532875	herm	syp2het	2022_08_05_DLW195het_555dsb2_488gfpcosa1_dapi_herm12_stitched
73.3303	266.983	DSB2	0.734658	herm	syp2het	2022_08_05_DLW195het_555dsb2_488gfpcosa1_dapi_herm12_stitched
24.5186	291.502	DSB2_stragler	0.802126	herm	syp2het	2022_08_05_DLW195het_555dsb2_488gfpcosa1_dapi_herm12_stitched
47.0177	338.52	None	0.931505	herm	syp2het	2022_08_05_DLW195het_555dsb2_488gfpcosa1_dapi_herm12_stitched
16.4085	354.928	None	0.976656	herm	syp2het	2022_08_05_DLW195het_555dsb2_488gfpcosa1_dapi_herm12_stitched
8.48354	363.412	None	1	herm	syp2het	2022_08_05_DLW195het_555dsb2_488gfpcosa1_dapi_herm12_stitched
45.6383	45.6383	None	0.10634	herm	syp2het	2022_08_05_DLW195het_555dsb2_488gfpcosa1_dapi_herm13_stitched
32.1554	77.7937	None	0.181264	herm	syp2het	2022_08_05_DLW195het_555dsb2_488gfpcosa1_dapi_herm13_stitched
20.009	97.8027	None	0.227886	herm	syp2het	2022_08_05_DLW195het_555dsb2_488gfpcosa1_dapi_herm13_stitched
30.0107	127.813	None	0.297813	herm	syp2het	2022_08_05_DLW195het_555dsb2_488gfpcosa1_dapi_herm13_stitched
49.6072	177.421	DSB2	0.413401	herm	syp2het	2022_08_05_DLW195het_555dsb2_488gfpcosa1_dapi_herm13_stitched
28.787	206.208	DSB2	0.480477	herm	syp2het	2022_08_05_DLW195het_555dsb2_488gfpcosa1_dapi_herm13_stitched
28.2046	234.412	DSB2	0.546195	herm	syp2het	2022_08_05_DLW195het_555dsb2_488gfpcosa1_dapi_herm13_stitched
77.531	311.943	DSB2	0.726847	herm	syp2het	2022_08_05_DLW195het_555dsb2_488gfpcosa1_dapi_herm13_stitched
80.7372	392.68	DSB2	0.91497	herm	syp2het	2022_08_05_DLW195het_555dsb2_488gfpcosa1_dapi_herm13_stitched
36.4926	429.173	DSB2_stragler	1	herm	syp2het	2022_08_05_DLW195het_555dsb2_488gfpcosa1_dapi_herm13_stitched
35.7957	35.7957	None	0.110953	herm	WT	2022_08_06_AV630_555dsb2_488gfpcosa1_herm1_stitched
29.4319	65.2275	None	0.20218	herm	WT	2022_08_06_AV630_555dsb2_488gfpcosa1_herm1_stitched
30.6282	95.8557	None	0.297116	herm	WT	2022_08_06_AV630_555dsb2_488gfpcosa1_herm1_stitched
9.99902	105.855	None	0.328109	herm	WT	2022_08_06_AV630_555dsb2_488gfpcosa1_herm1_stitched
28.0485	133.903	DSB2	0.415048	herm	WT	2022_08_06_AV630_555dsb2_488gfpcosa1_herm1_stitched
20.0132	153.916	DSB2	0.477082	herm	WT	2022_08_06_AV630_555dsb2_488gfpcosa1_herm1_stitched
22.0706	175.987	DSB2	0.545492	herm	WT	2022_08_06_AV630_555dsb2_488gfpcosa1_herm1_stitched
31.987	207.974	DSB2	0.644639	herm	WT	2022_08_06_AV630_555dsb2_488gfpcosa1_herm1_stitched
33.4974	241.471	DSB2	0.748468	herm	WT	2022_08_06_AV630_555dsb2_488gfpcosa1_herm1_stitched
26.9457	268.417	DSB2	0.83199	herm	WT	2022_08_06_AV630_555dsb2_488gfpcosa1_herm1_stitched
23.1437	291.561	DSB2_stragler	0.903726	herm	WT	2022_08_06_AV630_555dsb2_488gfpcosa1_herm1_stitched
19.6269	311.188	None	0.964562	herm	WT	2022_08_06_AV630_555dsb2_488gfpcosa1_herm1_stitched
11.433	322.621	None	1	herm	WT	2022_08_06_AV630_555dsb2_488gfpcosa1_herm1_stitched
14.3906	14.3906	None	0.0384189	herm	WT	2022_08_06_AV630_555dsb2_488gfpcosa1_herm2_stitched
45.3489	59.7395	None	0.159488	herm	WT	2022_08_06_AV630_555dsb2_488gfpcosa1_herm2_stitched
25.5888	85.3283	None	0.227802	herm	WT	2022_08_06_AV630_555dsb2_488gfpcosa1_herm2_stitched
5.69273	91.021	None	0.243	herm	WT	2022_08_06_AV630_555dsb2_488gfpcosa1_herm2_stitched
39.2209	130.242	DSB2	0.347709	herm	WT	2022_08_06_AV630_555dsb2_488gfpcosa1_herm2_stitched
61.8428	192.085	DSB2	0.512812	herm	WT	2022_08_06_AV630_555dsb2_488gfpcosa1_herm2_stitched
48.475	240.56	DSB2	0.642226	herm	WT	2022_08_06_AV630_555dsb2_488gfpcosa1_herm2_stitched
26.6368	267.196	DSB2	0.713339	herm	WT	2022_08_06_AV630_555dsb2_488gfpcosa1_herm2_stitched
30.1004	297.297	DSB2	0.793698	herm	WT	2022_08_06_AV630_555dsb2_488gfpcosa1_herm2_stitched
34.2343	331.531	DSB2_stragler	0.885094	herm	WT	2022_08_06_AV630_555dsb2_488gfpcosa1_herm2_stitched
19.4513	350.982	None	0.937024	herm	WT	2022_08_06_AV630_555dsb2_488gfpcosa1_herm2_stitched
23.5891	374.572	None	1	herm	WT	2022_08_06_AV630_555dsb2_488gfpcosa1_herm2_stitched
56.5336	56.5336	None	0.161377	herm	WT	2022_08_06_AV630_555dsb2_488gfpcosa1_herm3_stitched
12.6162	69.1498	None	0.19739	herm	WT	2022_08_06_AV630_555dsb2_488gfpcosa1_herm3_stitched
11.9478	81.0976	None	0.231496	herm	WT	2022_08_06_AV630_555dsb2_488gfpcosa1_herm3_stitched
21.9815	103.079	DSB2	0.294243	herm	WT	2022_08_06_AV630_555dsb2_488gfpcosa1_herm3_stitched
42.7137	145.793	DSB2	0.41617	herm	WT	2022_08_06_AV630_555dsb2_488gfpcosa1_herm3_stitched
39.191	184.984	DSB2	0.528042	herm	WT	2022_08_06_AV630_555dsb2_488gfpcosa1_herm3_stitched
56.2002	241.184	DSB2	0.688467	herm	WT	2022_08_06_AV630_555dsb2_488gfpcosa1_herm3_stitched
49.5757	290.76	DSB2_stragler	0.829983	herm	WT	2022_08_06_AV630_555dsb2_488gfpcosa1_herm3_stitched
23.0268	313.787	None	0.895713	herm	WT	2022_08_06_AV630_555dsb2_488gfpcosa1_herm3_stitched
36.5337	350.32	None	1	herm	WT	2022_08_06_AV630_555dsb2_488gfpcosa1_herm3_stitched
32.8722	32.8722	None	0.090296	herm	WT	2022_08_06_AV630_555dsb2_488gfpcosa1_herm4_stitched
19.6611	52.5333	None	0.144303	herm	WT	2022_08_06_AV630_555dsb2_488gfpcosa1_herm4_stitched
32.4785	85.0118	None	0.233517	herm	WT	2022_08_06_AV630_555dsb2_488gfpcosa1_herm4_stitched
13.4106	98.4224	None	0.270354	herm	WT	2022_08_06_AV630_555dsb2_488gfpcosa1_herm4_stitched
9.20677	107.629	None	0.295644	herm	WT	2022_08_06_AV630_555dsb2_488gfpcosa1_herm4_stitched
14.1148	121.744	DSB2	0.334416	herm	WT	2022_08_06_AV630_555dsb2_488gfpcosa1_herm4_stitched
43.6969	165.441	DSB2	0.454446	herm	WT	2022_08_06_AV630_555dsb2_488gfpcosa1_herm4_stitched
34.4344	199.875	DSB2	0.549033	herm	WT	2022_08_06_AV630_555dsb2_488gfpcosa1_herm4_stitched
32.3068	232.182	DSB2	0.637776	herm	WT	2022_08_06_AV630_555dsb2_488gfpcosa1_herm4_stitched
36.1106	268.293	DSB2	0.736967	herm	WT	2022_08_06_AV630_555dsb2_488gfpcosa1_herm4_stitched
22.8689	291.162	DSB2	0.799785	herm	WT	2022_08_06_AV630_555dsb2_488gfpcosa1_herm4_stitched
23.3525	314.514	None	0.863932	herm	WT	2022_08_06_AV630_555dsb2_488gfpcosa1_herm4_stitched
23.8457	338.36	None	0.929433	herm	WT	2022_08_06_AV630_555dsb2_488gfpcosa1_herm4_stitched
25.69	364.05	None	1	herm	WT	2022_08_06_AV630_555dsb2_488gfpcosa1_herm4_stitched
45.3419	45.3419	None	0.106555	herm	WT	2022_08_06_AV630_555dsb2_488gfpcosa1_herm5_stitched
72.8123	118.154	None	0.277667	herm	WT	2022_08_06_AV630_555dsb2_488gfpcosa1_herm5_stitched
13.4488	131.603	None	0.309272	herm	WT	2022_08_06_AV630_555dsb2_488gfpcosa1_herm5_stitched
28.1911	159.794	DSB2	0.375522	herm	WT	2022_08_06_AV630_555dsb2_488gfpcosa1_herm5_stitched
19.9902	179.784	DSB2	0.422499	herm	WT	2022_08_06_AV630_555dsb2_488gfpcosa1_herm5_stitched
23.6856	203.47	DSB2	0.478161	herm	WT	2022_08_06_AV630_555dsb2_488gfpcosa1_herm5_stitched
26.2132	229.683	DSB2	0.539763	herm	WT	2022_08_06_AV630_555dsb2_488gfpcosa1_herm5_stitched
23.5653	253.249	DSB2	0.595143	herm	WT	2022_08_06_AV630_555dsb2_488gfpcosa1_herm5_stitched
20.6436	273.892	DSB2	0.643656	herm	WT	2022_08_06_AV630_555dsb2_488gfpcosa1_herm5_stitched
16.6713	290.563	DSB2	0.682834	herm	WT	2022_08_06_AV630_555dsb2_488gfpcosa1_herm5_stitched
19.0462	309.61	DSB2	0.727593	herm	WT	2022_08_06_AV630_555dsb2_488gfpcosa1_herm5_stitched
27.693	337.303	DSB2	0.792673	herm	WT	2022_08_06_AV630_555dsb2_488gfpcosa1_herm5_stitched
20.677	357.98	DSB2	0.841264	herm	WT	2022_08_06_AV630_555dsb2_488gfpcosa1_herm5_stitched
23.1333	381.113	DSB2_stragler	0.895628	herm	WT	2022_08_06_AV630_555dsb2_488gfpcosa1_herm5_stitched
44.4128	425.526	None	1	herm	WT	2022_08_06_AV630_555dsb2_488gfpcosa1_herm5_stitched
52.0133	52.0133	None	0.131507	herm	WT	2022_08_06_AV630_555dsb2_488gfpcosa1_herm6_stitched
28.9502	80.9635	None	0.204703	herm	WT	2022_08_06_AV630_555dsb2_488gfpcosa1_herm6_stitched
18.0985	99.062	None	0.250462	herm	WT	2022_08_06_AV630_555dsb2_488gfpcosa1_herm6_stitched
30.4293	129.491	DSB2	0.327398	herm	WT	2022_08_06_AV630_555dsb2_488gfpcosa1_herm6_stitched
82.2372	211.729	DSB2	0.535322	herm	WT	2022_08_06_AV630_555dsb2_488gfpcosa1_herm6_stitched
66.0387	277.767	DSB2	0.70229	herm	WT	2022_08_06_AV630_555dsb2_488gfpcosa1_herm6_stitched
40.3455	318.113	DSB2_stragler	0.804297	herm	WT	2022_08_06_AV630_555dsb2_488gfpcosa1_herm6_stitched
77.4038	395.516	None	1	herm	WT	2022_08_06_AV630_555dsb2_488gfpcosa1_herm6_stitched
42.9738	42.9738	None	0.11178	herm	WT	2022_08_06_AV630_555dsb2_488gfpcosa1_herm7_stitched
14.0397	57.0135	None	0.148299	herm	WT	2022_08_06_AV630_555dsb2_488gfpcosa1_herm7_stitched
18.435	75.4485	None	0.19625	herm	WT	2022_08_06_AV630_555dsb2_488gfpcosa1_herm7_stitched
37.5988	113.047	None	0.294049	herm	WT	2022_08_06_AV630_555dsb2_488gfpcosa1_herm7_stitched
26.9762	140.023	None	0.364217	herm	WT	2022_08_06_AV630_555dsb2_488gfpcosa1_herm7_stitched
29.1526	169.176	DSB2	0.440047	herm	WT	2022_08_06_AV630_555dsb2_488gfpcosa1_herm7_stitched
33.7865	202.963	DSB2	0.527929	herm	WT	2022_08_06_AV630_555dsb2_488gfpcosa1_herm7_stitched
18.9511	221.914	DSB2	0.577223	herm	WT	2022_08_06_AV630_555dsb2_488gfpcosa1_herm7_stitched
15.7598	237.673	DSB2	0.618216	herm	WT	2022_08_06_AV630_555dsb2_488gfpcosa1_herm7_stitched
22.7347	260.408	DSB2	0.677352	herm	WT	2022_08_06_AV630_555dsb2_488gfpcosa1_herm7_stitched
12.7984	273.206	DSB2	0.710642	herm	WT	2022_08_06_AV630_555dsb2_488gfpcosa1_herm7_stitched
17.2265	290.433	DSB2	0.75545	herm	WT	2022_08_06_AV630_555dsb2_488gfpcosa1_herm7_stitched
29.8897	320.323	DSB2	0.833197	herm	WT	2022_08_06_AV630_555dsb2_488gfpcosa1_herm7_stitched
15.0569	335.38	DSB2_stragler	0.872361	herm	WT	2022_08_06_AV630_555dsb2_488gfpcosa1_herm7_stitched
18.7325	354.112	DSB2_stragler	0.921087	herm	WT	2022_08_06_AV630_555dsb2_488gfpcosa1_herm7_stitched
30.3381	384.45	None	1	herm	WT	2022_08_06_AV630_555dsb2_488gfpcosa1_herm7_stitched
28.7365	28.7365	None	0.0870717	herm	WT	2022_08_06_AV630_555dsb2_488gfpcosa1_herm9_stitched
10.4421	39.1786	None	0.118711	herm	WT	2022_08_06_AV630_555dsb2_488gfpcosa1_herm9_stitched
9.63618	48.8148	None	0.147909	herm	WT	2022_08_06_AV630_555dsb2_488gfpcosa1_herm9_stitched
11.9055	60.7203	None	0.183983	herm	WT	2022_08_06_AV630_555dsb2_488gfpcosa1_herm9_stitched
14.6121	75.3324	None	0.228257	herm	WT	2022_08_06_AV630_555dsb2_488gfpcosa1_herm9_stitched
23.5997	98.9321	None	0.299764	herm	WT	2022_08_06_AV630_555dsb2_488gfpcosa1_herm9_stitched
7.03352	105.966	DSB2	0.321076	herm	WT	2022_08_06_AV630_555dsb2_488gfpcosa1_herm9_stitched
46.4908	152.456	DSB2	0.461943	herm	WT	2022_08_06_AV630_555dsb2_488gfpcosa1_herm9_stitched
35.5046	187.961	DSB2	0.569522	herm	WT	2022_08_06_AV630_555dsb2_488gfpcosa1_herm9_stitched
56.2973	244.258	DSB2	0.740103	herm	WT	2022_08_06_AV630_555dsb2_488gfpcosa1_herm9_stitched
30.6839	274.942	DSB2_stragler	0.833075	herm	WT	2022_08_06_AV630_555dsb2_488gfpcosa1_herm9_stitched
55.0907	330.033	None	1	herm	WT	2022_08_06_AV630_555dsb2_488gfpcosa1_herm9_stitched
34.0669	34.0669	None	0.10232	herm	WT	2022_08_06_AV630_555dsb2_488gfpcosa1_herm10_stitched
20.2549	54.3217	None	0.163155	herm	WT	2022_08_06_AV630_555dsb2_488gfpcosa1_herm10_stitched
12.2218	66.5436	None	0.199863	herm	WT	2022_08_06_AV630_555dsb2_488gfpcosa1_herm10_stitched
17.2733	83.8168	None	0.251744	herm	WT	2022_08_06_AV630_555dsb2_488gfpcosa1_herm10_stitched
18.2256	102.042	None	0.306484	herm	WT	2022_08_06_AV630_555dsb2_488gfpcosa1_herm10_stitched
13.0885	115.131	None	0.345795	herm	WT	2022_08_06_AV630_555dsb2_488gfpcosa1_herm10_stitched
14.2775	129.408	DSB2	0.388678	herm	WT	2022_08_06_AV630_555dsb2_488gfpcosa1_herm10_stitched
19.4581	148.867	DSB2	0.44712	herm	WT	2022_08_06_AV630_555dsb2_488gfpcosa1_herm10_stitched
24.8583	173.725	DSB2	0.521782	herm	WT	2022_08_06_AV630_555dsb2_488gfpcosa1_herm10_stitched
33.9464	207.671	DSB2	0.62374	herm	WT	2022_08_06_AV630_555dsb2_488gfpcosa1_herm10_stitched
34.988	242.659	DSB2	0.728826	herm	WT	2022_08_06_AV630_555dsb2_488gfpcosa1_herm10_stitched
38.5396	281.199	DSB2_stragler	0.84458	herm	WT	2022_08_06_AV630_555dsb2_488gfpcosa1_herm10_stitched
51.7465	332.945	None	1	herm	WT	2022_08_06_AV630_555dsb2_488gfpcosa1_herm10_stitched
58.5056	58.5056	None	0.176161	herm	WT	2022_08_06_AV630_555dsb2_488gfpcosa1_herm12_stitched
26.7646	85.2702	None	0.256749	herm	WT	2022_08_06_AV630_555dsb2_488gfpcosa1_herm12_stitched
15.3858	100.656	DSB2	0.303076	herm	WT	2022_08_06_AV630_555dsb2_488gfpcosa1_herm12_stitched
9.05461	109.711	DSB2	0.330339	herm	WT	2022_08_06_AV630_555dsb2_488gfpcosa1_herm12_stitched
11.0953	120.806	DSB2	0.363747	herm	WT	2022_08_06_AV630_555dsb2_488gfpcosa1_herm12_stitched
17.0383	137.844	DSB2	0.41505	herm	WT	2022_08_06_AV630_555dsb2_488gfpcosa1_herm12_stitched
11.7828	149.627	DSB2	0.450528	herm	WT	2022_08_06_AV630_555dsb2_488gfpcosa1_herm12_stitched
15.0033	164.63	DSB2	0.495703	herm	WT	2022_08_06_AV630_555dsb2_488gfpcosa1_herm12_stitched
14.8844	179.515	DSB2	0.540519	herm	WT	2022_08_06_AV630_555dsb2_488gfpcosa1_herm12_stitched
21.953	201.468	DSB2	0.60662	herm	WT	2022_08_06_AV630_555dsb2_488gfpcosa1_herm12_stitched
18.3314	219.799	DSB2	0.661816	herm	WT	2022_08_06_AV630_555dsb2_488gfpcosa1_herm12_stitched
29.5882	249.387	DSB2	0.750906	herm	WT	2022_08_06_AV630_555dsb2_488gfpcosa1_herm12_stitched
29.8831	279.27	DSB2_stragler	0.840884	herm	WT	2022_08_06_AV630_555dsb2_488gfpcosa1_herm12_stitched
52.8448	332.115	None	1	herm	WT	2022_08_06_AV630_555dsb2_488gfpcosa1_herm12_stitched
29.2721	29.2721	None	0.0840002	herm	syp3het	2022_08_06_DLW196het_555dsb2_488gfpcosa1_herm1_stitched
32.3432	61.6153	None	0.176813	herm	syp3het	2022_08_06_DLW196het_555dsb2_488gfpcosa1_herm1_stitched
17.4812	79.0964	None	0.226978	herm	syp3het	2022_08_06_DLW196het_555dsb2_488gfpcosa1_herm1_stitched
18.6126	97.709	DSB2	0.280389	herm	syp3het	2022_08_06_DLW196het_555dsb2_488gfpcosa1_herm1_stitched
33.7139	131.423	DSB2	0.377136	herm	syp3het	2022_08_06_DLW196het_555dsb2_488gfpcosa1_herm1_stitched
52.4493	183.872	DSB2	0.527646	herm	syp3het	2022_08_06_DLW196het_555dsb2_488gfpcosa1_herm1_stitched
42.5753	226.448	DSB2	0.649821	herm	syp3het	2022_08_06_DLW196het_555dsb2_488gfpcosa1_herm1_stitched
39.6462	266.094	DSB2	0.763591	herm	syp3het	2022_08_06_DLW196het_555dsb2_488gfpcosa1_herm1_stitched
53.3884	319.482	DSB2_stragler	0.916797	herm	syp3het	2022_08_06_DLW196het_555dsb2_488gfpcosa1_herm1_stitched
28.9945	348.477	None	1	herm	syp3het	2022_08_06_DLW196het_555dsb2_488gfpcosa1_herm1_stitched
57.1855	57.1855	None	0.12939	herm	syp3het	2022_08_06_DLW196het_555dsb2_488gfpcosa1_herm2_stitched
53.8949	111.08	None	0.251334	herm	syp3het	2022_08_06_DLW196het_555dsb2_488gfpcosa1_herm2_stitched
16.345	127.425	None	0.288317	herm	syp3het	2022_08_06_DLW196het_555dsb2_488gfpcosa1_herm2_stitched
14.5203	141.946	None	0.321171	herm	syp3het	2022_08_06_DLW196het_555dsb2_488gfpcosa1_herm2_stitched
22.1486	164.094	None	0.371286	herm	syp3het	2022_08_06_DLW196het_555dsb2_488gfpcosa1_herm2_stitched
27.637	191.731	DSB2	0.433818	herm	syp3het	2022_08_06_DLW196het_555dsb2_488gfpcosa1_herm2_stitched
50.4105	242.142	DSB2	0.547878	herm	syp3het	2022_08_06_DLW196het_555dsb2_488gfpcosa1_herm2_stitched
40.0518	282.194	DSB2	0.638501	herm	syp3het	2022_08_06_DLW196het_555dsb2_488gfpcosa1_herm2_stitched
37.1054	319.299	DSB2	0.722457	herm	syp3het	2022_08_06_DLW196het_555dsb2_488gfpcosa1_herm2_stitched
17.7246	337.023	DSB2	0.762561	herm	syp3het	2022_08_06_DLW196het_555dsb2_488gfpcosa1_herm2_stitched
13.6636	350.687	DSB2_stragler	0.793477	herm	syp3het	2022_08_06_DLW196het_555dsb2_488gfpcosa1_herm2_stitched
19.642	370.329	DSB2_stragler	0.83792	herm	syp3het	2022_08_06_DLW196het_555dsb2_488gfpcosa1_herm2_stitched
50.2456	420.575	None	0.951607	herm	syp3het	2022_08_06_DLW196het_555dsb2_488gfpcosa1_herm2_stitched
21.3878	441.962	None	1	herm	syp3het	2022_08_06_DLW196het_555dsb2_488gfpcosa1_herm2_stitched
33.1127	33.1127	None	0.0958358	herm	syp3het	2022_08_06_DLW196het_555dsb2_488gfpcosa1_herm3_stitched
47.8361	80.9488	None	0.234285	herm	syp3het	2022_08_06_DLW196het_555dsb2_488gfpcosa1_herm3_stitched
16.4773	97.4261	None	0.281974	herm	syp3het	2022_08_06_DLW196het_555dsb2_488gfpcosa1_herm3_stitched
12.1201	109.546	DSB2	0.317052	herm	syp3het	2022_08_06_DLW196het_555dsb2_488gfpcosa1_herm3_stitched
32.3782	141.924	DSB2	0.410763	herm	syp3het	2022_08_06_DLW196het_555dsb2_488gfpcosa1_herm3_stitched
50.6649	192.589	DSB2	0.557399	herm	syp3het	2022_08_06_DLW196het_555dsb2_488gfpcosa1_herm3_stitched
47.5322	240.122	DSB2	0.694968	herm	syp3het	2022_08_06_DLW196het_555dsb2_488gfpcosa1_herm3_stitched
64.1217	304.243	DSB2_stragler	0.880551	herm	syp3het	2022_08_06_DLW196het_555dsb2_488gfpcosa1_herm3_stitched
41.2713	345.514	None	1	herm	syp3het	2022_08_06_DLW196het_555dsb2_488gfpcosa1_herm3_stitched
41.5019	41.5019	None	0.120679	herm	syp3het	2022_08_06_DLW196het_555dsb2_488gfpcosa1_herm4_stitched
24.3789	65.8808	None	0.191567	herm	syp3het	2022_08_06_DLW196het_555dsb2_488gfpcosa1_herm4_stitched
11.2118	77.0927	None	0.224169	herm	syp3het	2022_08_06_DLW196het_555dsb2_488gfpcosa1_herm4_stitched
18.1714	95.264	None	0.277008	herm	syp3het	2022_08_06_DLW196het_555dsb2_488gfpcosa1_herm4_stitched
18.2626	113.527	None	0.330111	herm	syp3het	2022_08_06_DLW196het_555dsb2_488gfpcosa1_herm4_stitched
16.3956	129.922	DSB2	0.377786	herm	syp3het	2022_08_06_DLW196het_555dsb2_488gfpcosa1_herm4_stitched
29.0959	159.018	DSB2	0.462391	herm	syp3het	2022_08_06_DLW196het_555dsb2_488gfpcosa1_herm4_stitched
106.422	265.44	DSB2	0.771842	herm	syp3het	2022_08_06_DLW196het_555dsb2_488gfpcosa1_herm4_stitched
11.7353	277.175	DSB2	0.805966	herm	syp3het	2022_08_06_DLW196het_555dsb2_488gfpcosa1_herm4_stitched
11.6924	288.867	DSB2_stragler	0.839965	herm	syp3het	2022_08_06_DLW196het_555dsb2_488gfpcosa1_herm4_stitched
55.0366	343.904	None	1	herm	syp3het	2022_08_06_DLW196het_555dsb2_488gfpcosa1_herm4_stitched
