# Supplementary material for: Sexual dimorphic regulation of recombination by the synaptonemal complex in C. elegans
Source: eLife. 2023 Oct 5;12:e84538. doi: 10.7554/eLife.84538 (PMC10611432; doi:10.7554/eLife.84538)
Supplement: Figure 5—source data 1. [file elife-84538-fig5-data1.xlsx]

## Sheet: Sheet1
Strain_number	Image_name	Surface_object_ID	nucleus_position	nucleus_position_normalized	RAD51	MSH5	Genotype	Sex	COSA1
AV630	2022_01_21_AV630_herm1_555rad51_488gfpcosa1_dapi_stitched	4	2.41718	0.016397	6		WT	herm	0
AV630	2022_01_21_AV630_herm1_555rad51_488gfpcosa1_dapi_stitched	3	6.40591	0.0434546	6		WT	herm	0
AV630	2022_01_21_AV630_herm1_555rad51_488gfpcosa1_dapi_stitched	2	6.42	0.0435502	8		WT	herm	0
AV630	2022_01_21_AV630_herm1_555rad51_488gfpcosa1_dapi_stitched	6	7.09097	0.0481017	5		WT	herm	1
AV630	2022_01_21_AV630_herm1_555rad51_488gfpcosa1_dapi_stitched	5	8.32663	0.0564839	5		WT	herm	1
AV630	2022_01_21_AV630_herm1_555rad51_488gfpcosa1_dapi_stitched	7	10.1794	0.0690519	2		WT	herm	0
AV630	2022_01_21_AV630_herm1_555rad51_488gfpcosa1_dapi_stitched	10	11.8443	0.0803462	1		WT	herm	1
AV630	2022_01_21_AV630_herm1_555rad51_488gfpcosa1_dapi_stitched	8	12.7352	0.0863897	5		WT	herm	0
AV630	2022_01_21_AV630_herm1_555rad51_488gfpcosa1_dapi_stitched	7	13.9225	0.0944435	2		WT	herm	0
AV630	2022_01_21_AV630_herm1_555rad51_488gfpcosa1_dapi_stitched	9	14.7528	0.100076	0		WT	herm	1
AV630	2022_01_21_AV630_herm1_555rad51_488gfpcosa1_dapi_stitched	13	18.5182	0.125618	4		WT	herm	0
AV630	2022_01_21_AV630_herm1_555rad51_488gfpcosa1_dapi_stitched	15	20.8014	0.141107	9		WT	herm	0
AV630	2022_01_21_AV630_herm1_555rad51_488gfpcosa1_dapi_stitched	14	20.8768	0.141618	5		WT	herm	1
AV630	2022_01_21_AV630_herm1_555rad51_488gfpcosa1_dapi_stitched	12	21.7797	0.147743	5		WT	herm	1
AV630	2022_01_21_AV630_herm1_555rad51_488gfpcosa1_dapi_stitched	11	23.5426	0.159702	2		WT	herm	2
AV630	2022_01_21_AV630_herm1_555rad51_488gfpcosa1_dapi_stitched	16	23.7344	0.161003	3		WT	herm	0
AV630	2022_01_21_AV630_herm1_555rad51_488gfpcosa1_dapi_stitched	17	26.145	0.177355	1		WT	herm	0
AV630	2022_01_21_AV630_herm1_555rad51_488gfpcosa1_dapi_stitched	21	32.079	0.217608	4		WT	herm	0
AV630	2022_01_21_AV630_herm1_555rad51_488gfpcosa1_dapi_stitched	19	33.2013	0.225222	3		WT	herm	1
AV630	2022_01_21_AV630_herm1_555rad51_488gfpcosa1_dapi_stitched	18	35.0372	0.237676	3		WT	herm	1
AV630	2022_01_21_AV630_herm1_555rad51_488gfpcosa1_dapi_stitched	22	35.746	0.242484	4		WT	herm	2
AV630	2022_01_21_AV630_herm1_555rad51_488gfpcosa1_dapi_stitched	20	36.5402	0.247872	3		WT	herm	1
AV630	2022_01_21_AV630_herm1_555rad51_488gfpcosa1_dapi_stitched	24	39.2203	0.266052	3		WT	herm	1
AV630	2022_01_21_AV630_herm1_555rad51_488gfpcosa1_dapi_stitched	23	40.7783	0.276621	6		WT	herm	1
AV630	2022_01_21_AV630_herm1_555rad51_488gfpcosa1_dapi_stitched	25	45.2312	0.306827	6		WT	herm	0
AV630	2022_01_21_AV630_herm1_555rad51_488gfpcosa1_dapi_stitched	27	49.0704	0.33287	4		WT	herm	3
AV630	2022_01_21_AV630_herm1_555rad51_488gfpcosa1_dapi_stitched	26	49.613	0.336551	2		WT	herm	2
AV630	2022_01_21_AV630_herm1_555rad51_488gfpcosa1_dapi_stitched	28	49.6733	0.33696	2		WT	herm	1
AV630	2022_01_21_AV630_herm1_555rad51_488gfpcosa1_dapi_stitched	32	52.2745	0.354606	1		WT	herm	2
AV630	2022_01_21_AV630_herm1_555rad51_488gfpcosa1_dapi_stitched	30	53.5211	0.363062	2		WT	herm	6
AV630	2022_01_21_AV630_herm1_555rad51_488gfpcosa1_dapi_stitched	29	56.1004	0.380558	2		WT	herm	2
AV630	2022_01_21_AV630_herm1_555rad51_488gfpcosa1_dapi_stitched	31	56.1844	0.381129	1		WT	herm	6
AV630	2022_01_21_AV630_herm1_555rad51_488gfpcosa1_dapi_stitched	33	57.1013	0.387348	5		WT	herm	2
AV630	2022_01_21_AV630_herm1_555rad51_488gfpcosa1_dapi_stitched	36	58.7513	0.398541	1		WT	herm	6
AV630	2022_01_21_AV630_herm1_555rad51_488gfpcosa1_dapi_stitched	35	60.7485	0.412089	2		WT	herm	6
AV630	2022_01_21_AV630_herm1_555rad51_488gfpcosa1_dapi_stitched	34	63.0048	0.427394	4		WT	herm	6
AV630	2022_01_21_AV630_herm1_555rad51_488gfpcosa1_dapi_stitched	37	63.2768	0.42924	4		WT	herm	4
AV630	2022_01_21_AV630_herm1_555rad51_488gfpcosa1_dapi_stitched	38	64.9173	0.440368	4		WT	herm	7
AV630	2022_01_21_AV630_herm1_555rad51_488gfpcosa1_dapi_stitched	39	66.7352	0.4527	4		WT	herm	5
AV630	2022_01_21_AV630_herm1_555rad51_488gfpcosa1_dapi_stitched	40	69.0268	0.468245	6		WT	herm	6
AV630	2022_01_21_AV630_herm1_555rad51_488gfpcosa1_dapi_stitched	41	69.1307	0.46895	3		WT	herm	6
AV630	2022_01_21_AV630_herm1_555rad51_488gfpcosa1_dapi_stitched	42	72.0109	0.488488	5		WT	herm	7
AV630	2022_01_21_AV630_herm1_555rad51_488gfpcosa1_dapi_stitched	47	73.2201	0.49669	1		WT	herm	6
AV630	2022_01_21_AV630_herm1_555rad51_488gfpcosa1_dapi_stitched	43	73.2512	0.496902	2		WT	herm	6
AV630	2022_01_21_AV630_herm1_555rad51_488gfpcosa1_dapi_stitched	46	76.6694	0.520089	2		WT	herm	6
AV630	2022_01_21_AV630_herm1_555rad51_488gfpcosa1_dapi_stitched	49	76.7078	0.520349	3		WT	herm	6
AV630	2022_01_21_AV630_herm1_555rad51_488gfpcosa1_dapi_stitched	44	76.8802	0.521519	3		WT	herm	6
AV630	2022_01_21_AV630_herm1_555rad51_488gfpcosa1_dapi_stitched	45	77.716	0.527188	0		WT	herm	6
AV630	2022_01_21_AV630_herm1_555rad51_488gfpcosa1_dapi_stitched	50	79.3586	0.538331	1		WT	herm	6
AV630	2022_01_21_AV630_herm1_555rad51_488gfpcosa1_dapi_stitched	48	79.6843	0.54054	1		WT	herm	6
AV630	2022_01_21_AV630_herm1_555rad51_488gfpcosa1_dapi_stitched	51	80.2451	0.544345	3		WT	herm	6
AV630	2022_01_21_AV630_herm1_555rad51_488gfpcosa1_dapi_stitched	57	81.6084	0.553592	3		WT	herm	5
AV630	2022_01_21_AV630_herm1_555rad51_488gfpcosa1_dapi_stitched	57	82.9594	0.562757	3		WT	herm	5
AV630	2022_01_21_AV630_herm1_555rad51_488gfpcosa1_dapi_stitched	58	84.3459	0.572162	5		WT	herm	6
AV630	2022_01_21_AV630_herm1_555rad51_488gfpcosa1_dapi_stitched	53	84.5398	0.573477	0		WT	herm	6
AV630	2022_01_21_AV630_herm1_555rad51_488gfpcosa1_dapi_stitched	56	87.6554	0.594613	1		WT	herm	6
AV630	2022_01_21_AV630_herm1_555rad51_488gfpcosa1_dapi_stitched	59	87.6581	0.594631	1		WT	herm	6
AV630	2022_01_21_AV630_herm1_555rad51_488gfpcosa1_dapi_stitched	54	87.7778	0.595443	2		WT	herm	6
AV630	2022_01_21_AV630_herm1_555rad51_488gfpcosa1_dapi_stitched	55	88.6876	0.601615	0		WT	herm	6
AV630	2022_01_21_AV630_herm1_555rad51_488gfpcosa1_dapi_stitched	62	91.6149	0.621472	8		WT	herm	6
AV630	2022_01_21_AV630_herm1_555rad51_488gfpcosa1_dapi_stitched	60	91.8686	0.623193	1		WT	herm	6
AV630	2022_01_21_AV630_herm1_555rad51_488gfpcosa1_dapi_stitched	63	93.0236	0.631028	6		WT	herm	6
AV630	2022_01_21_AV630_herm1_555rad51_488gfpcosa1_dapi_stitched	61	95.8338	0.650091	3		WT	herm	6
AV630	2022_01_21_AV630_herm1_555rad51_488gfpcosa1_dapi_stitched	64	96.4616	0.654349	0		WT	herm	6
AV630	2022_01_21_AV630_herm1_555rad51_488gfpcosa1_dapi_stitched	66	96.519	0.654739	4		WT	herm	6
AV630	2022_01_21_AV630_herm1_555rad51_488gfpcosa1_dapi_stitched	65	98.0823	0.665344	5		WT	herm	6
AV630	2022_01_21_AV630_herm1_555rad51_488gfpcosa1_dapi_stitched	69	99.1225	0.6724	3		WT	herm	5
AV630	2022_01_21_AV630_herm1_555rad51_488gfpcosa1_dapi_stitched	67	100.231	0.679917	1		WT	herm	6
AV630	2022_01_21_AV630_herm1_555rad51_488gfpcosa1_dapi_stitched	70	101.263	0.686918	0		WT	herm	6
AV630	2022_01_21_AV630_herm1_555rad51_488gfpcosa1_dapi_stitched	90	104.482	0.708757	1		WT	herm	6
AV630	2022_01_21_AV630_herm1_555rad51_488gfpcosa1_dapi_stitched	68	104.601	0.709562	9		WT	herm	6
AV630	2022_01_21_AV630_herm1_555rad51_488gfpcosa1_dapi_stitched	73	105.503	0.715681	2		WT	herm	6
AV630	2022_01_21_AV630_herm1_555rad51_488gfpcosa1_dapi_stitched	71	107.925	0.732115	1		WT	herm	6
AV630	2022_01_21_AV630_herm1_555rad51_488gfpcosa1_dapi_stitched	75	109.746	0.744465	2		WT	herm	6
AV630	2022_01_21_AV630_herm1_555rad51_488gfpcosa1_dapi_stitched	72	110.989	0.752896	2		WT	herm	6
AV630	2022_01_21_AV630_herm1_555rad51_488gfpcosa1_dapi_stitched	74	112.818	0.765302	1		WT	herm	6
AV630	2022_01_21_AV630_herm1_555rad51_488gfpcosa1_dapi_stitched	77	113.429	0.76945	3		WT	herm	6
AV630	2022_01_21_AV630_herm1_555rad51_488gfpcosa1_dapi_stitched	76	115.448	0.783144	1		WT	herm	6
AV630	2022_01_21_AV630_herm1_555rad51_488gfpcosa1_dapi_stitched	78	116.028	0.787078	0		WT	herm	6
AV630	2022_01_21_AV630_herm1_555rad51_488gfpcosa1_dapi_stitched	79	119.68	0.811851	1		WT	herm	6
AV630	2022_01_21_AV630_herm1_555rad51_488gfpcosa1_dapi_stitched	80	120.219	0.815507	1		WT	herm	6
AV630	2022_01_21_AV630_herm1_555rad51_488gfpcosa1_dapi_stitched	83	120.353	0.81642	9		WT	herm	5
AV630	2022_01_21_AV630_herm1_555rad51_488gfpcosa1_dapi_stitched	81	121.838	0.826488	0		WT	herm	6
AV630	2022_01_21_AV630_herm1_555rad51_488gfpcosa1_dapi_stitched	82	124.942	0.847547	0		WT	herm	6
AV630	2022_01_21_AV630_herm1_555rad51_488gfpcosa1_dapi_stitched	84	126.46	0.857848	1		WT	herm	6
AV630	2022_01_21_AV630_herm1_555rad51_488gfpcosa1_dapi_stitched	85	126.483	0.858003	2		WT	herm	6
AV630	2022_01_21_AV630_herm1_555rad51_488gfpcosa1_dapi_stitched	86	130.797	0.887264	1		WT	herm	5
AV630	2022_01_21_AV630_herm1_555rad51_488gfpcosa1_dapi_stitched	87	135.591	0.919788	0		WT	herm	6
AV630	2022_01_21_AV630_herm1_555rad51_488gfpcosa1_dapi_stitched	89	137.277	0.931219	0		WT	herm	6
AV630	2022_01_21_AV630_herm1_555rad51_488gfpcosa1_dapi_stitched	88	141.214	0.957928	0		WT	herm	6
AV630	2022_01_21_AV630_herm2_555rad51_488gfpcosa1_dapi_stitched	38	3.97212	0.0233213	3		WT	herm	0
AV630	2022_01_21_AV630_herm2_555rad51_488gfpcosa1_dapi_stitched	44	4.83548	0.0283903	2		WT	herm	0
AV630	2022_01_21_AV630_herm2_555rad51_488gfpcosa1_dapi_stitched	43	5.77967	0.0339339	8		WT	herm	0
AV630	2022_01_21_AV630_herm2_555rad51_488gfpcosa1_dapi_stitched	45	6.11589	0.0359079	8		WT	herm	0
AV630	2022_01_21_AV630_herm2_555rad51_488gfpcosa1_dapi_stitched	32	8.55958	0.0502555	5		WT	herm	1
AV630	2022_01_21_AV630_herm2_555rad51_488gfpcosa1_dapi_stitched	41	10.947	0.0642724	8		WT	herm	0
AV630	2022_01_21_AV630_herm2_555rad51_488gfpcosa1_dapi_stitched	41	11.2835	0.0662482	8		WT	herm	0
AV630	2022_01_21_AV630_herm2_555rad51_488gfpcosa1_dapi_stitched	34	12.1804	0.0715143	7		WT	herm	1
AV630	2022_01_21_AV630_herm2_555rad51_488gfpcosa1_dapi_stitched	28	13.0909	0.0768598	6		WT	herm	0
AV630	2022_01_21_AV630_herm2_555rad51_488gfpcosa1_dapi_stitched	33	15.0657	0.0884544	5		WT	herm	0
AV630	2022_01_21_AV630_herm2_555rad51_488gfpcosa1_dapi_stitched	42	16.0696	0.0943487	5		WT	herm	0
AV630	2022_01_21_AV630_herm2_555rad51_488gfpcosa1_dapi_stitched	26	16.7831	0.0985379	12		WT	herm	0
AV630	2022_01_21_AV630_herm2_555rad51_488gfpcosa1_dapi_stitched	37	19.968	0.117237	6		WT	herm	0
AV630	2022_01_21_AV630_herm2_555rad51_488gfpcosa1_dapi_stitched	30	20.7411	0.121776	4		WT	herm	0
AV630	2022_01_21_AV630_herm2_555rad51_488gfpcosa1_dapi_stitched	29	22.5688	0.132507	6		WT	herm	0
AV630	2022_01_21_AV630_herm2_555rad51_488gfpcosa1_dapi_stitched	24	23.9776	0.140779	5		WT	herm	0
AV630	2022_01_21_AV630_herm2_555rad51_488gfpcosa1_dapi_stitched	35	24.0255	0.14106	7		WT	herm	0
AV630	2022_01_21_AV630_herm2_555rad51_488gfpcosa1_dapi_stitched	39	24.7205	0.14514	5		WT	herm	0
AV630	2022_01_21_AV630_herm2_555rad51_488gfpcosa1_dapi_stitched	21	25.0659	0.147168	8		WT	herm	0
AV630	2022_01_21_AV630_herm2_555rad51_488gfpcosa1_dapi_stitched	36	26.7786	0.157224	6		WT	herm	0
AV630	2022_01_21_AV630_herm2_555rad51_488gfpcosa1_dapi_stitched	31	28.22	0.165687	5		WT	herm	0
AV630	2022_01_21_AV630_herm2_555rad51_488gfpcosa1_dapi_stitched	19	28.5093	0.167385	8		WT	herm	0
AV630	2022_01_21_AV630_herm2_555rad51_488gfpcosa1_dapi_stitched	22	30.3937	0.178449	4		WT	herm	0
AV630	2022_01_21_AV630_herm2_555rad51_488gfpcosa1_dapi_stitched	25	30.6324	0.179851	6		WT	herm	1
AV630	2022_01_21_AV630_herm2_555rad51_488gfpcosa1_dapi_stitched	27	33.7043	0.197886	4		WT	herm	0
AV630	2022_01_21_AV630_herm2_555rad51_488gfpcosa1_dapi_stitched	23	36.4588	0.214059	5		WT	herm	0
AV630	2022_01_21_AV630_herm2_555rad51_488gfpcosa1_dapi_stitched	17	38.4822	0.225939	12		WT	herm	0
AV630	2022_01_21_AV630_herm2_555rad51_488gfpcosa1_dapi_stitched	18	40.1822	0.23592	5		WT	herm	1
AV630	2022_01_21_AV630_herm2_555rad51_488gfpcosa1_dapi_stitched	14	40.5058	0.23782	5		WT	herm	0
AV630	2022_01_21_AV630_herm2_555rad51_488gfpcosa1_dapi_stitched	10	42.2828	0.248253	8		WT	herm	0
AV630	2022_01_21_AV630_herm2_555rad51_488gfpcosa1_dapi_stitched	20	43.5987	0.255979	5		WT	herm	0
AV630	2022_01_21_AV630_herm2_555rad51_488gfpcosa1_dapi_stitched	11	45.8754	0.269346	7		WT	herm	0
AV630	2022_01_21_AV630_herm2_555rad51_488gfpcosa1_dapi_stitched	16	46.2055	0.271284	6		WT	herm	0
AV630	2022_01_21_AV630_herm2_555rad51_488gfpcosa1_dapi_stitched	10	46.674	0.274035	8		WT	herm	0
AV630	2022_01_21_AV630_herm2_555rad51_488gfpcosa1_dapi_stitched	7	50.6522	0.297392	9		WT	herm	0
AV630	2022_01_21_AV630_herm2_555rad51_488gfpcosa1_dapi_stitched	15	52.1063	0.305929	6		WT	herm	0
AV630	2022_01_21_AV630_herm2_555rad51_488gfpcosa1_dapi_stitched	2	53.0284	0.311343	1		WT	herm	1
AV630	2022_01_21_AV630_herm2_555rad51_488gfpcosa1_dapi_stitched	12	53.4752	0.313966	2		WT	herm	0
AV630	2022_01_21_AV630_herm2_555rad51_488gfpcosa1_dapi_stitched	8	54.6383	0.320795	6		WT	herm	1
AV630	2022_01_21_AV630_herm2_555rad51_488gfpcosa1_dapi_stitched	3	55.0491	0.323207	6		WT	herm	1
AV630	2022_01_21_AV630_herm2_555rad51_488gfpcosa1_dapi_stitched	13	57.2042	0.33586	5		WT	herm	0
AV630	2022_01_21_AV630_herm2_555rad51_488gfpcosa1_dapi_stitched	4	58.1855	0.341622	0		WT	herm	0
AV630	2022_01_21_AV630_herm2_555rad51_488gfpcosa1_dapi_stitched	9	59.6371	0.350145	2		WT	herm	1
AV630	2022_01_21_AV630_herm2_555rad51_488gfpcosa1_dapi_stitched	1	61.0061	0.358182	2		WT	herm	0
AV630	2022_01_21_AV630_herm2_555rad51_488gfpcosa1_dapi_stitched	48	64.4447	0.378371	3		WT	herm	0
AV630	2022_01_21_AV630_herm2_555rad51_488gfpcosa1_dapi_stitched	46	65.8214	0.386454	3		WT	herm	1
AV630	2022_01_21_AV630_herm2_555rad51_488gfpcosa1_dapi_stitched	5	66.2971	0.389247	3		WT	herm	0
AV630	2022_01_21_AV630_herm2_555rad51_488gfpcosa1_dapi_stitched	52	66.8152	0.392289	2		WT	herm	1
AV630	2022_01_21_AV630_herm2_555rad51_488gfpcosa1_dapi_stitched	49	67.5931	0.396856	4		WT	herm	0
AV630	2022_01_21_AV630_herm2_555rad51_488gfpcosa1_dapi_stitched	56	68.7629	0.403724	3		WT	herm	3
AV630	2022_01_21_AV630_herm2_555rad51_488gfpcosa1_dapi_stitched	50	70.4529	0.413647	2		WT	herm	2
AV630	2022_01_21_AV630_herm2_555rad51_488gfpcosa1_dapi_stitched	47	71.2865	0.418541	1		WT	herm	2
AV630	2022_01_21_AV630_herm2_555rad51_488gfpcosa1_dapi_stitched	54	72.9943	0.428568	2		WT	herm	0
AV630	2022_01_21_AV630_herm2_555rad51_488gfpcosa1_dapi_stitched	56	73.3454	0.430629	3		WT	herm	3
AV630	2022_01_21_AV630_herm2_555rad51_488gfpcosa1_dapi_stitched	53	76.2824	0.447873	5		WT	herm	0
AV630	2022_01_21_AV630_herm2_555rad51_488gfpcosa1_dapi_stitched	57	79.7772	0.468392	4		WT	herm	2
AV630	2022_01_21_AV630_herm2_555rad51_488gfpcosa1_dapi_stitched	55	82.6706	0.48538	2		WT	herm	0
AV630	2022_01_21_AV630_herm2_555rad51_488gfpcosa1_dapi_stitched	58	84.3597	0.495297	3		WT	herm	2
AV630	2022_01_21_AV630_herm2_555rad51_488gfpcosa1_dapi_stitched	59	87.8178	0.5156	3		WT	herm	0
AV630	2022_01_21_AV630_herm2_555rad51_488gfpcosa1_dapi_stitched	60	90.0557	0.52874	5		WT	herm	5
AV630	2022_01_21_AV630_herm2_555rad51_488gfpcosa1_dapi_stitched	64	93.5678	0.54936	0		WT	herm	6
AV630	2022_01_21_AV630_herm2_555rad51_488gfpcosa1_dapi_stitched	63	93.6597	0.5499	1		WT	herm	2
AV630	2022_01_21_AV630_herm2_555rad51_488gfpcosa1_dapi_stitched	61	94.1342	0.552686	1		WT	herm	5
AV630	2022_01_21_AV630_herm2_555rad51_488gfpcosa1_dapi_stitched	62	97.3071	0.571314	2		WT	herm	5
AV630	2022_01_21_AV630_herm2_555rad51_488gfpcosa1_dapi_stitched	66	99.4602	0.583956	3		WT	herm	6
AV630	2022_01_21_AV630_herm2_555rad51_488gfpcosa1_dapi_stitched	65	102.639	0.602617	2		WT	herm	6
AV630	2022_01_21_AV630_herm2_555rad51_488gfpcosa1_dapi_stitched	68	102.784	0.603471	2		WT	herm	6
AV630	2022_01_21_AV630_herm2_555rad51_488gfpcosa1_dapi_stitched	67	104.475	0.613396	1		WT	herm	6
AV630	2022_01_21_AV630_herm2_555rad51_488gfpcosa1_dapi_stitched	69	106.789	0.626987	5		WT	herm	5
AV630	2022_01_21_AV630_herm2_555rad51_488gfpcosa1_dapi_stitched	72	112.991	0.663401	1		WT	herm	6
AV630	2022_01_21_AV630_herm2_555rad51_488gfpcosa1_dapi_stitched	70	113.289	0.665151	0		WT	herm	6
AV630	2022_01_21_AV630_herm2_555rad51_488gfpcosa1_dapi_stitched	71	116.339	0.683058	0		WT	herm	6
AV630	2022_01_21_AV630_herm2_555rad51_488gfpcosa1_dapi_stitched	74	118.868	0.697904	2		WT	herm	6
AV630	2022_01_21_AV630_herm2_555rad51_488gfpcosa1_dapi_stitched	73	122.264	0.717841	0		WT	herm	6
AV630	2022_01_21_AV630_herm2_555rad51_488gfpcosa1_dapi_stitched	76	125.383	0.736154	1		WT	herm	6
AV630	2022_01_21_AV630_herm2_555rad51_488gfpcosa1_dapi_stitched	75	126.74	0.744123	0		WT	herm	6
AV630	2022_01_21_AV630_herm2_555rad51_488gfpcosa1_dapi_stitched	77	130.697	0.767358	1		WT	herm	6
AV630	2022_01_21_AV630_herm2_555rad51_488gfpcosa1_dapi_stitched	79	133.854	0.785893	2		WT	herm	6
AV630	2022_01_21_AV630_herm2_555rad51_488gfpcosa1_dapi_stitched	80	134.242	0.788168	1		WT	herm	6
AV630	2022_01_21_AV630_herm2_555rad51_488gfpcosa1_dapi_stitched	78	134.53	0.789859	0		WT	herm	6
AV630	2022_01_21_AV630_herm2_555rad51_488gfpcosa1_dapi_stitched	82	137.439	0.80694	0		WT	herm	6
AV630	2022_01_21_AV630_herm2_555rad51_488gfpcosa1_dapi_stitched	81	137.624	0.808026	0		WT	herm	6
AV630	2022_01_21_AV630_herm2_555rad51_488gfpcosa1_dapi_stitched	83	141.028	0.828013	0		WT	herm	6
AV630	2022_01_21_AV630_herm2_555rad51_488gfpcosa1_dapi_stitched	85	144.564	0.848772	2		WT	herm	6
AV630	2022_01_21_AV630_herm2_555rad51_488gfpcosa1_dapi_stitched	84	144.602	0.848995	0		WT	herm	6
AV630	2022_01_21_AV630_herm2_555rad51_488gfpcosa1_dapi_stitched	86	149.924	0.880244	0		WT	herm	6
AV630	2022_01_21_AV630_herm2_555rad51_488gfpcosa1_dapi_stitched	88	154.079	0.904637	0		WT	herm	6
AV630	2022_01_21_AV630_herm2_555rad51_488gfpcosa1_dapi_stitched	87	155.645	0.913829	0		WT	herm	6
AV630	2022_01_21_AV630_herm2_555rad51_488gfpcosa1_dapi_stitched	89	161.403	0.947635	0		WT	herm	6
AV630	2022_01_21_AV630_herm2_555rad51_488gfpcosa1_dapi_stitched	90	162.494	0.954044	0		WT	herm	6
AV630	2022_01_21_AV630_herm2_555rad51_488gfpcosa1_dapi_stitched	91	164.552	0.966126	1		WT	herm	6
AV630	2022_02_04_AV630_555rad51_488gfpcosa1_dapi_herm1_stitched	1	2.45627	0.0147228	5		WT	herm	0
AV630	2022_02_04_AV630_555rad51_488gfpcosa1_dapi_herm1_stitched	6	3.02381	0.0181246	4		WT	herm	0
AV630	2022_02_04_AV630_555rad51_488gfpcosa1_dapi_herm1_stitched	3	3.42397	0.0205232	6		WT	herm	0
AV630	2022_02_04_AV630_555rad51_488gfpcosa1_dapi_herm1_stitched	7	5.02033	0.0300918	5		WT	herm	0
AV630	2022_02_04_AV630_555rad51_488gfpcosa1_dapi_herm1_stitched	2	5.44004	0.0326075	3		WT	herm	0
AV630	2022_02_04_AV630_555rad51_488gfpcosa1_dapi_herm1_stitched	5	7.15665	0.0428968	3		WT	herm	0
AV630	2022_02_04_AV630_555rad51_488gfpcosa1_dapi_herm1_stitched	13	7.68128	0.0460414	3		WT	herm	0
AV630	2022_02_04_AV630_555rad51_488gfpcosa1_dapi_herm1_stitched	20	8.40204	0.0503617	3		WT	herm	0
AV630	2022_02_04_AV630_555rad51_488gfpcosa1_dapi_herm1_stitched	16	10.0599	0.0602988	5		WT	herm	0
AV630	2022_02_04_AV630_555rad51_488gfpcosa1_dapi_herm1_stitched	17	10.2614	0.0615063	5		WT	herm	0
AV630	2022_02_04_AV630_555rad51_488gfpcosa1_dapi_herm1_stitched	10	10.7422	0.0643887	3		WT	herm	0
AV630	2022_02_04_AV630_555rad51_488gfpcosa1_dapi_herm1_stitched	14	12.2112	0.0731936	7		WT	herm	0
AV630	2022_02_04_AV630_555rad51_488gfpcosa1_dapi_herm1_stitched	18	12.2568	0.0734671	8		WT	herm	0
AV630	2022_02_04_AV630_555rad51_488gfpcosa1_dapi_herm1_stitched	15	13.5503	0.0812204	2		WT	herm	0
AV630	2022_02_04_AV630_555rad51_488gfpcosa1_dapi_herm1_stitched	21	15.0066	0.0899489	3		WT	herm	0
AV630	2022_02_04_AV630_555rad51_488gfpcosa1_dapi_herm1_stitched	26	15.163	0.0908865	5		WT	herm	0
AV630	2022_02_04_AV630_555rad51_488gfpcosa1_dapi_herm1_stitched	23	17.1507	0.102801	4		WT	herm	0
AV630	2022_02_04_AV630_555rad51_488gfpcosa1_dapi_herm1_stitched	37	17.6547	0.105822	3		WT	herm	0
AV630	2022_02_04_AV630_555rad51_488gfpcosa1_dapi_herm1_stitched	22	17.6811	0.10598	4		WT	herm	0
AV630	2022_02_04_AV630_555rad51_488gfpcosa1_dapi_herm1_stitched	19	18.2975	0.109675	5		WT	herm	0
AV630	2022_02_04_AV630_555rad51_488gfpcosa1_dapi_herm1_stitched	28	19.4382	0.116512	7		WT	herm	0
AV630	2022_02_04_AV630_555rad51_488gfpcosa1_dapi_herm1_stitched	24	21.0496	0.126171	3		WT	herm	0
AV630	2022_02_04_AV630_555rad51_488gfpcosa1_dapi_herm1_stitched	32	21.5913	0.129418	8		WT	herm	0
AV630	2022_02_04_AV630_555rad51_488gfpcosa1_dapi_herm1_stitched	31	22.6061	0.135501	7		WT	herm	0
AV630	2022_02_04_AV630_555rad51_488gfpcosa1_dapi_herm1_stitched	27	23.9888	0.143788	3		WT	herm	0
AV630	2022_02_04_AV630_555rad51_488gfpcosa1_dapi_herm1_stitched	30	24.7985	0.148642	4		WT	herm	0
AV630	2022_02_04_AV630_555rad51_488gfpcosa1_dapi_herm1_stitched	29	26.3126	0.157717	8		WT	herm	0
AV630	2022_02_04_AV630_555rad51_488gfpcosa1_dapi_herm1_stitched	36	27.264	0.16342	3		WT	herm	0
AV630	2022_02_04_AV630_555rad51_488gfpcosa1_dapi_herm1_stitched	33	28.4462	0.170506	6		WT	herm	0
AV630	2022_02_04_AV630_555rad51_488gfpcosa1_dapi_herm1_stitched	38	28.4777	0.170695	4		WT	herm	0
AV630	2022_02_04_AV630_555rad51_488gfpcosa1_dapi_herm1_stitched	44	30.0103	0.179881	10		WT	herm	0
AV630	2022_02_04_AV630_555rad51_488gfpcosa1_dapi_herm1_stitched	40	30.7891	0.184549	3		WT	herm	0
AV630	2022_02_04_AV630_555rad51_488gfpcosa1_dapi_herm1_stitched	45	31.3032	0.187631	6		WT	herm	0
AV630	2022_02_04_AV630_555rad51_488gfpcosa1_dapi_herm1_stitched	50	31.3884	0.188141	4		WT	herm	0
AV630	2022_02_04_AV630_555rad51_488gfpcosa1_dapi_herm1_stitched	39	31.7301	0.19019	3		WT	herm	0
AV630	2022_02_04_AV630_555rad51_488gfpcosa1_dapi_herm1_stitched	43	32.8161	0.196699	3		WT	herm	0
AV630	2022_02_04_AV630_555rad51_488gfpcosa1_dapi_herm1_stitched	41	34.6439	0.207655	8		WT	herm	0
AV630	2022_02_04_AV630_555rad51_488gfpcosa1_dapi_herm1_stitched	42	35.0452	0.21006	5		WT	herm	0
AV630	2022_02_04_AV630_555rad51_488gfpcosa1_dapi_herm1_stitched	48	35.2467	0.211268	2		WT	herm	0
AV630	2022_02_04_AV630_555rad51_488gfpcosa1_dapi_herm1_stitched	46	36.6036	0.219401	2		WT	herm	2
AV630	2022_02_04_AV630_555rad51_488gfpcosa1_dapi_herm1_stitched	52	38.7625	0.232342	10		WT	herm	0
AV630	2022_02_04_AV630_555rad51_488gfpcosa1_dapi_herm1_stitched	47	39.2603	0.235325	4		WT	herm	0
AV630	2022_02_04_AV630_555rad51_488gfpcosa1_dapi_herm1_stitched	49	40.8673	0.244958	5		WT	herm	0
AV630	2022_02_04_AV630_555rad51_488gfpcosa1_dapi_herm1_stitched	54	41.631	0.249535	2		WT	herm	1
AV630	2022_02_04_AV630_555rad51_488gfpcosa1_dapi_herm1_stitched	51	42.1673	0.25275	4		WT	herm	1
AV630	2022_02_04_AV630_555rad51_488gfpcosa1_dapi_herm1_stitched	55	42.7116	0.256013	7		WT	herm	0
AV630	2022_02_04_AV630_555rad51_488gfpcosa1_dapi_herm1_stitched	56	43.5499	0.261037	5		WT	herm	0
AV630	2022_02_04_AV630_555rad51_488gfpcosa1_dapi_herm1_stitched	53	45.7967	0.274504	5		WT	herm	0
AV630	2022_02_04_AV630_555rad51_488gfpcosa1_dapi_herm1_stitched	61	47.3043	0.283541	10		WT	herm	0
AV630	2022_02_04_AV630_555rad51_488gfpcosa1_dapi_herm1_stitched	57	47.6899	0.285852	2		WT	herm	1
AV630	2022_02_04_AV630_555rad51_488gfpcosa1_dapi_herm1_stitched	62	47.8942	0.287077	1		WT	herm	1
AV630	2022_02_04_AV630_555rad51_488gfpcosa1_dapi_herm1_stitched	58	48.2283	0.289079	2		WT	herm	1
AV630	2022_02_04_AV630_555rad51_488gfpcosa1_dapi_herm1_stitched	59	50.6164	0.303394	4		WT	herm	0
AV630	2022_02_04_AV630_555rad51_488gfpcosa1_dapi_herm1_stitched	63	50.6742	0.30374	6		WT	herm	1
AV630	2022_02_04_AV630_555rad51_488gfpcosa1_dapi_herm1_stitched	81	54.8467	0.32875	2		WT	herm	0
AV630	2022_02_04_AV630_555rad51_488gfpcosa1_dapi_herm1_stitched	67	54.9017	0.329079	3		WT	herm	2
AV630	2022_02_04_AV630_555rad51_488gfpcosa1_dapi_herm1_stitched	71	54.9318	0.32926	1		WT	herm	0
AV630	2022_02_04_AV630_555rad51_488gfpcosa1_dapi_herm1_stitched	66	55.4583	0.332416	3		WT	herm	0
AV630	2022_02_04_AV630_555rad51_488gfpcosa1_dapi_herm1_stitched	65	57.5316	0.344843	2		WT	herm	0
AV630	2022_02_04_AV630_555rad51_488gfpcosa1_dapi_herm1_stitched	76	59.2663	0.355241	3		WT	herm	0
AV630	2022_02_04_AV630_555rad51_488gfpcosa1_dapi_herm1_stitched	73	59.5409	0.356887	4		WT	herm	0
AV630	2022_02_04_AV630_555rad51_488gfpcosa1_dapi_herm1_stitched	72	60.1047	0.360266	2		WT	herm	0
AV630	2022_02_04_AV630_555rad51_488gfpcosa1_dapi_herm1_stitched	79	61.7667	0.370228	3		WT	herm	2
AV630	2022_02_04_AV630_555rad51_488gfpcosa1_dapi_herm1_stitched	78	65.1184	0.390318	4		WT	herm	0
AV630	2022_02_04_AV630_555rad51_488gfpcosa1_dapi_herm1_stitched	83	66.2965	0.39738	5		WT	herm	1
AV630	2022_02_04_AV630_555rad51_488gfpcosa1_dapi_herm1_stitched	70	66.6726	0.399634	2		WT	herm	0
AV630	2022_02_04_AV630_555rad51_488gfpcosa1_dapi_herm1_stitched	85	66.7926	0.400353	4		WT	herm	0
AV630	2022_02_04_AV630_555rad51_488gfpcosa1_dapi_herm1_stitched	75	67.1186	0.402307	3		WT	herm	0
AV630	2022_02_04_AV630_555rad51_488gfpcosa1_dapi_herm1_stitched	86	68.2705	0.409212	2		WT	herm	0
AV630	2022_02_04_AV630_555rad51_488gfpcosa1_dapi_herm1_stitched	87	70.1764	0.420636	2		WT	herm	0
AV630	2022_02_04_AV630_555rad51_488gfpcosa1_dapi_herm1_stitched	82	70.8436	0.424635	2		WT	herm	1
AV630	2022_02_04_AV630_555rad51_488gfpcosa1_dapi_herm1_stitched	84	73.037	0.437782	5		WT	herm	1
AV630	2022_02_04_AV630_555rad51_488gfpcosa1_dapi_herm1_stitched	80	74.1977	0.444739	3		WT	herm	2
AV630	2022_02_04_AV630_555rad51_488gfpcosa1_dapi_herm1_stitched	92	75.3545	0.451673	3		WT	herm	1
AV630	2022_02_04_AV630_555rad51_488gfpcosa1_dapi_herm1_stitched	88	77.5496	0.46483	2		WT	herm	2
AV630	2022_02_04_AV630_555rad51_488gfpcosa1_dapi_herm1_stitched	90	78.7696	0.472143	2		WT	herm	0
AV630	2022_02_04_AV630_555rad51_488gfpcosa1_dapi_herm1_stitched	89	80.9312	0.4851	3		WT	herm	0
AV630	2022_02_04_AV630_555rad51_488gfpcosa1_dapi_herm1_stitched	97	81.8609	0.490672	3		WT	herm	0
AV630	2022_02_04_AV630_555rad51_488gfpcosa1_dapi_herm1_stitched	94	84.5409	0.506736	5		WT	herm	0
AV630	2022_02_04_AV630_555rad51_488gfpcosa1_dapi_herm1_stitched	93	85.6603	0.513446	2		WT	herm	1
AV630	2022_02_04_AV630_555rad51_488gfpcosa1_dapi_herm1_stitched	101	86.2039	0.516704	3		WT	herm	2
AV630	2022_02_04_AV630_555rad51_488gfpcosa1_dapi_herm1_stitched	91	87.5917	0.525022	1		WT	herm	3
AV630	2022_02_04_AV630_555rad51_488gfpcosa1_dapi_herm1_stitched	95	87.8229	0.526408	4		WT	herm	2
AV630	2022_02_04_AV630_555rad51_488gfpcosa1_dapi_herm1_stitched	100	88.8074	0.53231	0		WT	herm	4
AV630	2022_02_04_AV630_555rad51_488gfpcosa1_dapi_herm1_stitched	108	91.7498	0.549946	5		WT	herm	2
AV630	2022_02_04_AV630_555rad51_488gfpcosa1_dapi_herm1_stitched	98	91.7954	0.55022	3		WT	herm	3
AV630	2022_02_04_AV630_555rad51_488gfpcosa1_dapi_herm1_stitched	102	93.0239	0.557583	2		WT	herm	6
AV630	2022_02_04_AV630_555rad51_488gfpcosa1_dapi_herm1_stitched	110	94.6831	0.567529	5		WT	herm	3
AV630	2022_02_04_AV630_555rad51_488gfpcosa1_dapi_herm1_stitched	99	95.597	0.573006	2		WT	herm	5
AV630	2022_02_04_AV630_555rad51_488gfpcosa1_dapi_herm1_stitched	104	95.8449	0.574492	1		WT	herm	5
AV630	2022_02_04_AV630_555rad51_488gfpcosa1_dapi_herm1_stitched	117	97.6649	0.585401	4		WT	herm	5
AV630	2022_02_04_AV630_555rad51_488gfpcosa1_dapi_herm1_stitched	109	100.406	0.601829	4		WT	herm	3
AV630	2022_02_04_AV630_555rad51_488gfpcosa1_dapi_herm1_stitched	105	101.331	0.607374	0		WT	herm	6
AV630	2022_02_04_AV630_555rad51_488gfpcosa1_dapi_herm1_stitched	107	101.357	0.607529	4		WT	herm	6
AV630	2022_02_04_AV630_555rad51_488gfpcosa1_dapi_herm1_stitched	106	102.155	0.612314	2		WT	herm	5
AV630	2022_02_04_AV630_555rad51_488gfpcosa1_dapi_herm1_stitched	112	104.332	0.625364	4		WT	herm	5
AV630	2022_02_04_AV630_555rad51_488gfpcosa1_dapi_herm1_stitched	125	105.618	0.633073	0		WT	herm	6
AV630	2022_02_04_AV630_555rad51_488gfpcosa1_dapi_herm1_stitched	114	107.047	0.641638	2		WT	herm	6
AV630	2022_02_04_AV630_555rad51_488gfpcosa1_dapi_herm1_stitched	122	109.275	0.65499	2		WT	herm	6
AV630	2022_02_04_AV630_555rad51_488gfpcosa1_dapi_herm1_stitched	132	110.305	0.661166	3		WT	herm	6
AV630	2022_02_04_AV630_555rad51_488gfpcosa1_dapi_herm1_stitched	124	110.838	0.664363	0		WT	herm	6
AV630	2022_02_04_AV630_555rad51_488gfpcosa1_dapi_herm1_stitched	115	113.745	0.681784	0		WT	herm	6
AV630	2022_02_04_AV630_555rad51_488gfpcosa1_dapi_herm1_stitched	126	117.054	0.701617	0		WT	herm	6
AV630	2022_02_04_AV630_555rad51_488gfpcosa1_dapi_herm1_stitched	135	117.778	0.705959	2		WT	herm	6
AV630	2022_02_04_AV630_555rad51_488gfpcosa1_dapi_herm1_stitched	119	118.382	0.709578	1		WT	herm	6
AV630	2022_02_04_AV630_555rad51_488gfpcosa1_dapi_herm1_stitched	120	120.659	0.723227	0		WT	herm	6
AV630	2022_02_04_AV630_555rad51_488gfpcosa1_dapi_herm1_stitched	147	121.64	0.729109	0		WT	herm	6
AV630	2022_02_04_AV630_555rad51_488gfpcosa1_dapi_herm1_stitched	133	122.571	0.734688	0		WT	herm	6
AV630	2022_02_04_AV630_555rad51_488gfpcosa1_dapi_herm1_stitched	127	127.702	0.765445	2		WT	herm	6
AV630	2022_02_04_AV630_555rad51_488gfpcosa1_dapi_herm1_stitched	130	127.954	0.766954	0		WT	herm	6
AV630	2022_02_04_AV630_555rad51_488gfpcosa1_dapi_herm1_stitched	149	129.528	0.776389	1		WT	herm	6
AV630	2022_02_04_AV630_555rad51_488gfpcosa1_dapi_herm1_stitched	151	130.452	0.781927	2		WT	herm	6
AV630	2022_02_04_AV630_555rad51_488gfpcosa1_dapi_herm1_stitched	146	131.037	0.785435	2		WT	herm	5
AV630	2022_02_04_AV630_555rad51_488gfpcosa1_dapi_herm1_stitched	140	131.68	0.789288	0		WT	herm	6
AV630	2022_02_04_AV630_555rad51_488gfpcosa1_dapi_herm1_stitched	137	134.096	0.803769	2		WT	herm	6
AV630	2022_02_04_AV630_555rad51_488gfpcosa1_dapi_herm1_stitched	134	134.529	0.806365	0		WT	herm	6
AV630	2022_02_04_AV630_555rad51_488gfpcosa1_dapi_herm1_stitched	141	135.1	0.809785	0		WT	herm	6
AV630	2022_02_04_AV630_555rad51_488gfpcosa1_dapi_herm1_stitched	153	138.361	0.829335	0		WT	herm	6
AV630	2022_02_04_AV630_555rad51_488gfpcosa1_dapi_herm1_stitched	155	138.864	0.83235	1		WT	herm	6
AV630	2022_02_04_AV630_555rad51_488gfpcosa1_dapi_herm1_stitched	144	140.518	0.842261	2		WT	herm	6
AV630	2022_02_04_AV630_555rad51_488gfpcosa1_dapi_herm1_stitched	142	140.839	0.844184	0		WT	herm	6
AV630	2022_02_04_AV630_555rad51_488gfpcosa1_dapi_herm1_stitched	158	140.978	0.845016	1		WT	herm	6
AV630	2022_02_04_AV630_555rad51_488gfpcosa1_dapi_herm1_stitched	139	143.494	0.860102	0		WT	herm	6
AV630	2022_02_04_AV630_555rad51_488gfpcosa1_dapi_herm1_stitched	154	144.049	0.863424	1		WT	herm	6
AV630	2022_02_04_AV630_555rad51_488gfpcosa1_dapi_herm1_stitched	162	145.862	0.874294	1		WT	herm	6
AV630	2022_02_04_AV630_555rad51_488gfpcosa1_dapi_herm1_stitched	160	146.544	0.87838	0		WT	herm	6
AV630	2022_02_04_AV630_555rad51_488gfpcosa1_dapi_herm1_stitched	152	147.476	0.883966	0		WT	herm	6
AV630	2022_02_04_AV630_555rad51_488gfpcosa1_dapi_herm1_stitched	157	148.878	0.892373	1		WT	herm	6
AV630	2022_02_04_AV630_555rad51_488gfpcosa1_dapi_herm1_stitched	145	149.392	0.89545	0		WT	herm	6
AV630	2022_02_04_AV630_555rad51_488gfpcosa1_dapi_herm1_stitched	164	151.544	0.908353	1		WT	herm	6
AV630	2022_02_04_AV630_555rad51_488gfpcosa1_dapi_herm1_stitched	156	151.96	0.910845	0		WT	herm	6
AV630	2022_02_04_AV630_555rad51_488gfpcosa1_dapi_herm1_stitched	150	153.932	0.922667	0		WT	herm	6
AV630	2022_02_04_AV630_555rad51_488gfpcosa1_dapi_herm1_stitched	165	156.26	0.936621	0		WT	herm	6
AV630	2022_02_04_AV630_555rad51_488gfpcosa1_dapi_herm1_stitched	161	156.26	0.936621	0		WT	herm	6
AV630	2022_02_04_AV630_555rad51_488gfpcosa1_dapi_herm1_stitched	168	157.907	0.946489	0		WT	herm	6
AV630	2022_02_04_AV630_555rad51_488gfpcosa1_dapi_herm1_stitched	169	161.959	0.97078	0		WT	herm	6
AV630	2022_02_04_AV630_555rad51_488gfpcosa1_dapi_herm1_stitched	166	162.831	0.976003	0		WT	herm	6
AV630	2022_02_04_AV630_555rad51_488gfpcosa1_dapi_herm1_stitched	163	163.848	0.982099	0		WT	herm	6
DLW195het	2022_02_04_DLW195het_555rad51_488gfpcosa1_dapi_herm1_stitched	83	2.55484	0.0130001	8		syp2het	herm	0
DLW195het	2022_02_04_DLW195het_555rad51_488gfpcosa1_dapi_herm1_stitched	10	5.40293	0.0274924	4		syp2het	herm	0
DLW195het	2022_02_04_DLW195het_555rad51_488gfpcosa1_dapi_herm1_stitched	15	6.23182	0.0317101	3		syp2het	herm	0
DLW195het	2022_02_04_DLW195het_555rad51_488gfpcosa1_dapi_herm1_stitched	22	7.245	0.0368656	9		syp2het	herm	0
DLW195het	2022_02_04_DLW195het_555rad51_488gfpcosa1_dapi_herm1_stitched	58	7.91509	0.0402753	7		syp2het	herm	1
DLW195het	2022_02_04_DLW195het_555rad51_488gfpcosa1_dapi_herm1_stitched	25	9.31077	0.0473771	5		syp2het	herm	0
DLW195het	2022_02_04_DLW195het_555rad51_488gfpcosa1_dapi_herm1_stitched	30	10.3915	0.0528762	4		syp2het	herm	0
DLW195het	2022_02_04_DLW195het_555rad51_488gfpcosa1_dapi_herm1_stitched	16	11.8424	0.0602591	5		syp2het	herm	0
DLW195het	2022_02_04_DLW195het_555rad51_488gfpcosa1_dapi_herm1_stitched	70	12.1694	0.061923	4		syp2het	herm	0
DLW195het	2022_02_04_DLW195het_555rad51_488gfpcosa1_dapi_herm1_stitched	26	12.3801	0.062995	8		syp2het	herm	0
DLW195het	2022_02_04_DLW195het_555rad51_488gfpcosa1_dapi_herm1_stitched	24	14.9853	0.0762513	7		syp2het	herm	0
DLW195het	2022_02_04_DLW195het_555rad51_488gfpcosa1_dapi_herm1_stitched	20	15.0715	0.07669	8		syp2het	herm	0
DLW195het	2022_02_04_DLW195het_555rad51_488gfpcosa1_dapi_herm1_stitched	47	15.7596	0.0801914	1		syp2het	herm	0
DLW195het	2022_02_04_DLW195het_555rad51_488gfpcosa1_dapi_herm1_stitched	92	17.4255	0.0886683	2		syp2het	herm	0
DLW195het	2022_02_04_DLW195het_555rad51_488gfpcosa1_dapi_herm1_stitched	13	17.4624	0.0888562	3		syp2het	herm	0
DLW195het	2022_02_04_DLW195het_555rad51_488gfpcosa1_dapi_herm1_stitched	77	17.8517	0.0908371	10		syp2het	herm	1
DLW195het	2022_02_04_DLW195het_555rad51_488gfpcosa1_dapi_herm1_stitched	37	18.4984	0.0941279	8		syp2het	herm	0
DLW195het	2022_02_04_DLW195het_555rad51_488gfpcosa1_dapi_herm1_stitched	19	21.1136	0.107435	4		syp2het	herm	0
DLW195het	2022_02_04_DLW195het_555rad51_488gfpcosa1_dapi_herm1_stitched	4	21.6071	0.109946	10		syp2het	herm	0
DLW195het	2022_02_04_DLW195het_555rad51_488gfpcosa1_dapi_herm1_stitched	21	21.8231	0.111045	5		syp2het	herm	0
DLW195het	2022_02_04_DLW195het_555rad51_488gfpcosa1_dapi_herm1_stitched	86	23.2593	0.118353	3		syp2het	herm	0
DLW195het	2022_02_04_DLW195het_555rad51_488gfpcosa1_dapi_herm1_stitched	48	25.4351	0.129425	3		syp2het	herm	1
DLW195het	2022_02_04_DLW195het_555rad51_488gfpcosa1_dapi_herm1_stitched	14	26.0918	0.132766	5		syp2het	herm	0
DLW195het	2022_02_04_DLW195het_555rad51_488gfpcosa1_dapi_herm1_stitched	42	29.2085	0.148625	3		syp2het	herm	0
DLW195het	2022_02_04_DLW195het_555rad51_488gfpcosa1_dapi_herm1_stitched	23	29.8473	0.151876	6		syp2het	herm	0
DLW195het	2022_02_04_DLW195het_555rad51_488gfpcosa1_dapi_herm1_stitched	103	30.1316	0.153322	4		syp2het	herm	1
DLW195het	2022_02_04_DLW195het_555rad51_488gfpcosa1_dapi_herm1_stitched	28	30.636	0.155889	8		syp2het	herm	0
DLW195het	2022_02_04_DLW195het_555rad51_488gfpcosa1_dapi_herm1_stitched	84	30.7014	0.156222	6		syp2het	herm	0
DLW195het	2022_02_04_DLW195het_555rad51_488gfpcosa1_dapi_herm1_stitched	17	31.2707	0.159119	15		syp2het	herm	0
DLW195het	2022_02_04_DLW195het_555rad51_488gfpcosa1_dapi_herm1_stitched	55	34.005	0.173032	3		syp2het	herm	0
DLW195het	2022_02_04_DLW195het_555rad51_488gfpcosa1_dapi_herm1_stitched	124	34.7767	0.176959	2		syp2het	herm	0
DLW195het	2022_02_04_DLW195het_555rad51_488gfpcosa1_dapi_herm1_stitched	43	36.2194	0.1843	2		syp2het	herm	0
DLW195het	2022_02_04_DLW195het_555rad51_488gfpcosa1_dapi_herm1_stitched	76	37.0474	0.188513	1		syp2het	herm	0
DLW195het	2022_02_04_DLW195het_555rad51_488gfpcosa1_dapi_herm1_stitched	11	37.6048	0.191349	15		syp2het	herm	0
DLW195het	2022_02_04_DLW195het_555rad51_488gfpcosa1_dapi_herm1_stitched	82	38.2726	0.194747	4		syp2het	herm	0
DLW195het	2022_02_04_DLW195het_555rad51_488gfpcosa1_dapi_herm1_stitched	108	38.4267	0.195531	3		syp2het	herm	0
DLW195het	2022_02_04_DLW195het_555rad51_488gfpcosa1_dapi_herm1_stitched	114	40.5728	0.206451	9		syp2het	herm	0
DLW195het	2022_02_04_DLW195het_555rad51_488gfpcosa1_dapi_herm1_stitched	52	41.7496	0.212439	3		syp2het	herm	0
DLW195het	2022_02_04_DLW195het_555rad51_488gfpcosa1_dapi_herm1_stitched	73	44.6917	0.22741	1		syp2het	herm	0
DLW195het	2022_02_04_DLW195het_555rad51_488gfpcosa1_dapi_herm1_stitched	123	45.6883	0.232481	7		syp2het	herm	0
DLW195het	2022_02_04_DLW195het_555rad51_488gfpcosa1_dapi_herm1_stitched	116	46.2156	0.235165	3		syp2het	herm	1
DLW195het	2022_02_04_DLW195het_555rad51_488gfpcosa1_dapi_herm1_stitched	29	46.4733	0.236475	3		syp2het	herm	0
DLW195het	2022_02_04_DLW195het_555rad51_488gfpcosa1_dapi_herm1_stitched	38	48.2888	0.245714	3		syp2het	herm	0
DLW195het	2022_02_04_DLW195het_555rad51_488gfpcosa1_dapi_herm1_stitched	80	49.1973	0.250337	0		syp2het	herm	0
DLW195het	2022_02_04_DLW195het_555rad51_488gfpcosa1_dapi_herm1_stitched	143	51.3192	0.261134	4		syp2het	herm	0
DLW195het	2022_02_04_DLW195het_555rad51_488gfpcosa1_dapi_herm1_stitched	130	51.4091	0.261591	2		syp2het	herm	0
DLW195het	2022_02_04_DLW195het_555rad51_488gfpcosa1_dapi_herm1_stitched	74	53.0775	0.270081	3		syp2het	herm	0
DLW195het	2022_02_04_DLW195het_555rad51_488gfpcosa1_dapi_herm1_stitched	32	54.4505	0.277067	1		syp2het	herm	0
DLW195het	2022_02_04_DLW195het_555rad51_488gfpcosa1_dapi_herm1_stitched	91	56.4421	0.287201	1		syp2het	herm	2
DLW195het	2022_02_04_DLW195het_555rad51_488gfpcosa1_dapi_herm1_stitched	170	58.493	0.297637	9		syp2het	herm	0
DLW195het	2022_02_04_DLW195het_555rad51_488gfpcosa1_dapi_herm1_stitched	78	59.6138	0.30334	2		syp2het	herm	0
DLW195het	2022_02_04_DLW195het_555rad51_488gfpcosa1_dapi_herm1_stitched	125	61.9899	0.315431	2		syp2het	herm	1
DLW195het	2022_02_04_DLW195het_555rad51_488gfpcosa1_dapi_herm1_stitched	144	62.6204	0.318639	1		syp2het	herm	0
DLW195het	2022_02_04_DLW195het_555rad51_488gfpcosa1_dapi_herm1_stitched	177	63.0177	0.32066	4		syp2het	herm	0
DLW195het	2022_02_04_DLW195het_555rad51_488gfpcosa1_dapi_herm1_stitched	102	66.4102	0.337923	4		syp2het	herm	0
DLW195het	2022_02_04_DLW195het_555rad51_488gfpcosa1_dapi_herm1_stitched	169	69.645	0.354383	3		syp2het	herm	0
DLW195het	2022_02_04_DLW195het_555rad51_488gfpcosa1_dapi_herm1_stitched	62	70.3074	0.357754	6		syp2het	herm	0
DLW195het	2022_02_04_DLW195het_555rad51_488gfpcosa1_dapi_herm1_stitched	126	70.9734	0.361142	1		syp2het	herm	0
DLW195het	2022_02_04_DLW195het_555rad51_488gfpcosa1_dapi_herm1_stitched	139	73.8156	0.375605	2		syp2het	herm	0
DLW195het	2022_02_04_DLW195het_555rad51_488gfpcosa1_dapi_herm1_stitched	81	74.5152	0.379165	0		syp2het	herm	0
DLW195het	2022_02_04_DLW195het_555rad51_488gfpcosa1_dapi_herm1_stitched	187	76.4288	0.388902	2		syp2het	herm	2
DLW195het	2022_02_04_DLW195het_555rad51_488gfpcosa1_dapi_herm1_stitched	106	78.4352	0.399111	1		syp2het	herm	0
DLW195het	2022_02_04_DLW195het_555rad51_488gfpcosa1_dapi_herm1_stitched	31	78.6104	0.400003	1		syp2het	herm	0
DLW195het	2022_02_04_DLW195het_555rad51_488gfpcosa1_dapi_herm1_stitched	93	82.1263	0.417893	8		syp2het	herm	0
DLW195het	2022_02_04_DLW195het_555rad51_488gfpcosa1_dapi_herm1_stitched	168	85.0918	0.432983	2		syp2het	herm	3
DLW195het	2022_02_04_DLW195het_555rad51_488gfpcosa1_dapi_herm1_stitched	115	85.5236	0.43518	4		syp2het	herm	1
DLW195het	2022_02_04_DLW195het_555rad51_488gfpcosa1_dapi_herm1_stitched	174	85.7049	0.436103	4		syp2het	herm	0
DLW195het	2022_02_04_DLW195het_555rad51_488gfpcosa1_dapi_herm1_stitched	34	85.826	0.436719	3		syp2het	herm	1
DLW195het	2022_02_04_DLW195het_555rad51_488gfpcosa1_dapi_herm1_stitched	75	88.5972	0.45082	6		syp2het	herm	5
DLW195het	2022_02_04_DLW195het_555rad51_488gfpcosa1_dapi_herm1_stitched	112	88.6177	0.450924	9		syp2het	herm	0
DLW195het	2022_02_04_DLW195het_555rad51_488gfpcosa1_dapi_herm1_stitched	146	88.7465	0.45158	1		syp2het	herm	1
DLW195het	2022_02_04_DLW195het_555rad51_488gfpcosa1_dapi_herm1_stitched	142	90.076	0.458344	1		syp2het	herm	3
DLW195het	2022_02_04_DLW195het_555rad51_488gfpcosa1_dapi_herm1_stitched	63	90.9701	0.462894	1		syp2het	herm	6
DLW195het	2022_02_04_DLW195het_555rad51_488gfpcosa1_dapi_herm1_stitched	40	93.3101	0.474801	2		syp2het	herm	4
DLW195het	2022_02_04_DLW195het_555rad51_488gfpcosa1_dapi_herm1_stitched	145	94.0432	0.478531	1		syp2het	herm	6
DLW195het	2022_02_04_DLW195het_555rad51_488gfpcosa1_dapi_herm1_stitched	198	95.2044	0.48444	4		syp2het	herm	1
DLW195het	2022_02_04_DLW195het_555rad51_488gfpcosa1_dapi_herm1_stitched	96	95.2567	0.484706	1		syp2het	herm	6
DLW195het	2022_02_04_DLW195het_555rad51_488gfpcosa1_dapi_herm1_stitched	133	98.2055	0.499711	0		syp2het	herm	4
DLW195het	2022_02_04_DLW195het_555rad51_488gfpcosa1_dapi_herm1_stitched	188	102.517	0.521652	4		syp2het	herm	6
DLW195het	2022_02_04_DLW195het_555rad51_488gfpcosa1_dapi_herm1_stitched	104	102.613	0.522137	2		syp2het	herm	6
DLW195het	2022_02_04_DLW195het_555rad51_488gfpcosa1_dapi_herm1_stitched	212	103.838	0.528369	5		syp2het	herm	6
DLW195het	2022_02_04_DLW195het_555rad51_488gfpcosa1_dapi_herm1_stitched	95	104.195	0.530186	0		syp2het	herm	6
DLW195het	2022_02_04_DLW195het_555rad51_488gfpcosa1_dapi_herm1_stitched	66	105.369	0.536162	0		syp2het	herm	5
DLW195het	2022_02_04_DLW195het_555rad51_488gfpcosa1_dapi_herm1_stitched	171	105.935	0.53904	2		syp2het	herm	3
DLW195het	2022_02_04_DLW195het_555rad51_488gfpcosa1_dapi_herm1_stitched	129	105.955	0.539142	1		syp2het	herm	6
DLW195het	2022_02_04_DLW195het_555rad51_488gfpcosa1_dapi_herm1_stitched	190	107.436	0.54668	1		syp2het	herm	6
DLW195het	2022_02_04_DLW195het_555rad51_488gfpcosa1_dapi_herm1_stitched	110	110.769	0.563642	4		syp2het	herm	5
DLW195het	2022_02_04_DLW195het_555rad51_488gfpcosa1_dapi_herm1_stitched	109	110.94	0.564511	0		syp2het	herm	5
DLW195het	2022_02_04_DLW195het_555rad51_488gfpcosa1_dapi_herm1_stitched	59	111.408	0.566889	10		syp2het	herm	0
DLW195het	2022_02_04_DLW195het_555rad51_488gfpcosa1_dapi_herm1_stitched	183	111.463	0.567168	2		syp2het	herm	6
DLW195het	2022_02_04_DLW195het_555rad51_488gfpcosa1_dapi_herm1_stitched	213	111.468	0.567194	7		syp2het	herm	6
DLW195het	2022_02_04_DLW195het_555rad51_488gfpcosa1_dapi_herm1_stitched	196	113.126	0.575633	4		syp2het	herm	5
DLW195het	2022_02_04_DLW195het_555rad51_488gfpcosa1_dapi_herm1_stitched	191	115.095	0.585651	0		syp2het	herm	6
DLW195het	2022_02_04_DLW195het_555rad51_488gfpcosa1_dapi_herm1_stitched	156	115.757	0.589022	2		syp2het	herm	6
DLW195het	2022_02_04_DLW195het_555rad51_488gfpcosa1_dapi_herm1_stitched	117	118.773	0.604366	2		syp2het	herm	6
DLW195het	2022_02_04_DLW195het_555rad51_488gfpcosa1_dapi_herm1_stitched	111	118.98	0.60542	0		syp2het	herm	6
DLW195het	2022_02_04_DLW195het_555rad51_488gfpcosa1_dapi_herm1_stitched	207	119.622	0.608689	1		syp2het	herm	6
DLW195het	2022_02_04_DLW195het_555rad51_488gfpcosa1_dapi_herm1_stitched	186	120.305	0.612161	9		syp2het	herm	0
DLW195het	2022_02_04_DLW195het_555rad51_488gfpcosa1_dapi_herm1_stitched	167	120.402	0.612655	0		syp2het	herm	6
DLW195het	2022_02_04_DLW195het_555rad51_488gfpcosa1_dapi_herm1_stitched	87	121.846	0.620004	3		syp2het	herm	7
DLW195het	2022_02_04_DLW195het_555rad51_488gfpcosa1_dapi_herm1_stitched	199	122.455	0.6231	4		syp2het	herm	6
DLW195het	2022_02_04_DLW195het_555rad51_488gfpcosa1_dapi_herm1_stitched	160	123.494	0.628388	0		syp2het	herm	6
DLW195het	2022_02_04_DLW195het_555rad51_488gfpcosa1_dapi_herm1_stitched	210	129.157	0.657205	1		syp2het	herm	6
DLW195het	2022_02_04_DLW195het_555rad51_488gfpcosa1_dapi_herm1_stitched	128	129.373	0.658307	1		syp2het	herm	6
DLW195het	2022_02_04_DLW195het_555rad51_488gfpcosa1_dapi_herm1_stitched	172	132.315	0.673274	0		syp2het	herm	6
DLW195het	2022_02_04_DLW195het_555rad51_488gfpcosa1_dapi_herm1_stitched	61	132.989	0.676706	6		syp2het	herm	2
DLW195het	2022_02_04_DLW195het_555rad51_488gfpcosa1_dapi_herm1_stitched	98	134.17	0.682712	1		syp2het	herm	6
DLW195het	2022_02_04_DLW195het_555rad51_488gfpcosa1_dapi_herm1_stitched	101	136.142	0.692747	0		syp2het	herm	5
DLW195het	2022_02_04_DLW195het_555rad51_488gfpcosa1_dapi_herm1_stitched	154	136.152	0.6928	0		syp2het	herm	5
DLW195het	2022_02_04_DLW195het_555rad51_488gfpcosa1_dapi_herm1_stitched	150	140.806	0.716478	1		syp2het	herm	6
DLW195het	2022_02_04_DLW195het_555rad51_488gfpcosa1_dapi_herm1_stitched	113	141.452	0.719767	0		syp2het	herm	6
DLW195het	2022_02_04_DLW195het_555rad51_488gfpcosa1_dapi_herm1_stitched	127	141.52	0.720114	0		syp2het	herm	6
DLW195het	2022_02_04_DLW195het_555rad51_488gfpcosa1_dapi_herm1_stitched	79	141.855	0.721819	1		syp2het	herm	6
DLW195het	2022_02_04_DLW195het_555rad51_488gfpcosa1_dapi_herm1_stitched	204	142.213	0.723641	0		syp2het	herm	5
DLW195het	2022_02_04_DLW195het_555rad51_488gfpcosa1_dapi_herm1_stitched	193	142.926	0.727269	0		syp2het	herm	5
DLW195het	2022_02_04_DLW195het_555rad51_488gfpcosa1_dapi_herm1_stitched	89	144.79	0.736752	0		syp2het	herm	4
DLW195het	2022_02_04_DLW195het_555rad51_488gfpcosa1_dapi_herm1_stitched	105	144.863	0.737122	0		syp2het	herm	6
DLW195het	2022_02_04_DLW195het_555rad51_488gfpcosa1_dapi_herm1_stitched	173	146.298	0.744425	0		syp2het	herm	6
DLW195het	2022_02_04_DLW195het_555rad51_488gfpcosa1_dapi_herm1_stitched	184	149.204	0.759215	0		syp2het	herm	6
DLW195het	2022_02_04_DLW195het_555rad51_488gfpcosa1_dapi_herm1_stitched	200	150.103	0.763787	0		syp2het	herm	6
DLW195het	2022_02_04_DLW195het_555rad51_488gfpcosa1_dapi_herm1_stitched	148	150.616	0.7664	0		syp2het	herm	6
DLW195het	2022_02_04_DLW195het_555rad51_488gfpcosa1_dapi_herm1_stitched	140	150.966	0.76818	0		syp2het	herm	6
DLW195het	2022_02_04_DLW195het_555rad51_488gfpcosa1_dapi_herm1_stitched	100	151.448	0.770632	0		syp2het	herm	6
DLW195het	2022_02_04_DLW195het_555rad51_488gfpcosa1_dapi_herm1_stitched	181	154.325	0.785272	0		syp2het	herm	6
DLW195het	2022_02_04_DLW195het_555rad51_488gfpcosa1_dapi_herm1_stitched	153	157.914	0.80353	0		syp2het	herm	6
DLW195het	2022_02_04_DLW195het_555rad51_488gfpcosa1_dapi_herm1_stitched	141	161.164	0.82007	1		syp2het	herm	6
DLW195het	2022_02_04_DLW195het_555rad51_488gfpcosa1_dapi_herm1_stitched	119	161.283	0.820677	1		syp2het	herm	6
DLW195het	2022_02_04_DLW195het_555rad51_488gfpcosa1_dapi_herm1_stitched	215	162.072	0.824692	0		syp2het	herm	6
DLW195het	2022_02_04_DLW195het_555rad51_488gfpcosa1_dapi_herm1_stitched	192	162.763	0.828206	0		syp2het	herm	6
DLW195het	2022_02_04_DLW195het_555rad51_488gfpcosa1_dapi_herm1_stitched	214	169.938	0.864718	0		syp2het	herm	6
DLW195het	2022_02_04_DLW195het_555rad51_488gfpcosa1_dapi_herm1_stitched	216	170.523	0.867694	0		syp2het	herm	6
DLW195het	2022_02_04_DLW195het_555rad51_488gfpcosa1_dapi_herm1_stitched	135	171.341	0.871854	0		syp2het	herm	6
DLW195het	2022_02_04_DLW195het_555rad51_488gfpcosa1_dapi_herm1_stitched	149	174.221	0.886509	0		syp2het	herm	6
DLW195het	2022_02_04_DLW195het_555rad51_488gfpcosa1_dapi_herm1_stitched	203	176.355	0.897368	1		syp2het	herm	6
DLW195het	2022_02_04_DLW195het_555rad51_488gfpcosa1_dapi_herm1_stitched	132	176.943	0.900359	0		syp2het	herm	6
DLW195het	2022_02_04_DLW195het_555rad51_488gfpcosa1_dapi_herm1_stitched	164	178.902	0.910327	1		syp2het	herm	6
DLW195het	2022_02_04_DLW195het_555rad51_488gfpcosa1_dapi_herm1_stitched	147	181.294	0.922498	0		syp2het	herm	6
DLW195het	2022_02_04_DLW195het_555rad51_488gfpcosa1_dapi_herm1_stitched	202	184.165	0.937111	0		syp2het	herm	6
DLW195het	2022_02_04_DLW195het_555rad51_488gfpcosa1_dapi_herm1_stitched	211	185.278	0.94277	0		syp2het	herm	6
DLW195het	2022_02_04_DLW195het_555rad51_488gfpcosa1_dapi_herm1_stitched	151	186.941	0.951234	0		syp2het	herm	6
DLW195het	2022_02_04_DLW195het_555rad51_488gfpcosa1_dapi_herm1_stitched	179	191.096	0.972378	0		syp2het	herm	6
DLW195het	2022_02_04_DLW195het_555rad51_488gfpcosa1_dapi_herm1_stitched	209	194.129	0.987809	0		syp2het	herm	6
DLW195het	2022_02_04_DLW195het_555rad51_488gfpcosa1_dapi_herm1_stitched	205	194.194	0.98814	0		syp2het	herm	6
DLW195het	2022_02_04_DLW195het_555rad51_488gfpcosa1_dapi_herm2_01_stitched	163	0.129075	0.00086923	4		syp2het	herm	0
DLW195het	2022_02_04_DLW195het_555rad51_488gfpcosa1_dapi_herm2_01_stitched	159	2.75508	0.0185535	6		syp2het	herm	0
DLW195het	2022_02_04_DLW195het_555rad51_488gfpcosa1_dapi_herm2_01_stitched	158	3.14395	0.0211723	6		syp2het	herm	0
DLW195het	2022_02_04_DLW195het_555rad51_488gfpcosa1_dapi_herm2_01_stitched	147	4.11331	0.0277002	5		syp2het	herm	0
DLW195het	2022_02_04_DLW195het_555rad51_488gfpcosa1_dapi_herm2_01_stitched	153	4.35127	0.0293027	7		syp2het	herm	0
DLW195het	2022_02_04_DLW195het_555rad51_488gfpcosa1_dapi_herm2_01_stitched	156	5.07246	0.0341594	8		syp2het	herm	0
DLW195het	2022_02_04_DLW195het_555rad51_488gfpcosa1_dapi_herm2_01_stitched	160	5.56505	0.0374767	4		syp2het	herm	0
DLW195het	2022_02_04_DLW195het_555rad51_488gfpcosa1_dapi_herm2_01_stitched	149	6.52403	0.0439347	5		syp2het	herm	0
DLW195het	2022_02_04_DLW195het_555rad51_488gfpcosa1_dapi_herm2_01_stitched	146	6.65243	0.0447994	5		syp2het	herm	0
DLW195het	2022_02_04_DLW195het_555rad51_488gfpcosa1_dapi_herm2_01_stitched	152	8.28626	0.0558021	2		syp2het	herm	0
DLW195het	2022_02_04_DLW195het_555rad51_488gfpcosa1_dapi_herm2_01_stitched	151	9.07543	0.0611167	7		syp2het	herm	0
DLW195het	2022_02_04_DLW195het_555rad51_488gfpcosa1_dapi_herm2_01_stitched	139	10.2051	0.0687239	3		syp2het	herm	0
DLW195het	2022_02_04_DLW195het_555rad51_488gfpcosa1_dapi_herm2_01_stitched	143	10.246	0.0689994	7		syp2het	herm	0
DLW195het	2022_02_04_DLW195het_555rad51_488gfpcosa1_dapi_herm2_01_stitched	157	10.9055	0.0734406	5		syp2het	herm	0
DLW195het	2022_02_04_DLW195het_555rad51_488gfpcosa1_dapi_herm2_01_stitched	161	10.973	0.0738952	10		syp2het	herm	0
DLW195het	2022_02_04_DLW195het_555rad51_488gfpcosa1_dapi_herm2_01_stitched	138	12.569	0.0846437	6		syp2het	herm	0
DLW195het	2022_02_04_DLW195het_555rad51_488gfpcosa1_dapi_herm2_01_stitched	141	14.389	0.0968997	8		syp2het	herm	0
DLW195het	2022_02_04_DLW195het_555rad51_488gfpcosa1_dapi_herm2_01_stitched	144	14.8707	0.100144	7		syp2het	herm	0
DLW195het	2022_02_04_DLW195het_555rad51_488gfpcosa1_dapi_herm2_01_stitched	148	15.695	0.105695	6		syp2het	herm	0
DLW195het	2022_02_04_DLW195het_555rad51_488gfpcosa1_dapi_herm2_01_stitched	150	15.7321	0.105945	5		syp2het	herm	0
DLW195het	2022_02_04_DLW195het_555rad51_488gfpcosa1_dapi_herm2_01_stitched	154	16.4016	0.110453	4		syp2het	herm	0
DLW195het	2022_02_04_DLW195het_555rad51_488gfpcosa1_dapi_herm2_01_stitched	124	17.3021	0.116517	5		syp2het	herm	0
DLW195het	2022_02_04_DLW195het_555rad51_488gfpcosa1_dapi_herm2_01_stitched	132	19.727	0.132847	10		syp2het	herm	0
DLW195het	2022_02_04_DLW195het_555rad51_488gfpcosa1_dapi_herm2_01_stitched	127	19.8351	0.133576	5		syp2het	herm	0
DLW195het	2022_02_04_DLW195het_555rad51_488gfpcosa1_dapi_herm2_01_stitched	133	20.4534	0.137739	6		syp2het	herm	0
DLW195het	2022_02_04_DLW195het_555rad51_488gfpcosa1_dapi_herm2_01_stitched	136	22.0391	0.148418	9		syp2het	herm	0
DLW195het	2022_02_04_DLW195het_555rad51_488gfpcosa1_dapi_herm2_01_stitched	145	22.9002	0.154217	10		syp2het	herm	2
DLW195het	2022_02_04_DLW195het_555rad51_488gfpcosa1_dapi_herm2_01_stitched	129	22.9735	0.154711	5		syp2het	herm	1
DLW195het	2022_02_04_DLW195het_555rad51_488gfpcosa1_dapi_herm2_01_stitched	114	23.1656	0.156004	9		syp2het	herm	0
DLW195het	2022_02_04_DLW195het_555rad51_488gfpcosa1_dapi_herm2_01_stitched	126	23.2024	0.156252	8		syp2het	herm	0
DLW195het	2022_02_04_DLW195het_555rad51_488gfpcosa1_dapi_herm2_01_stitched	120	26.2595	0.17684	8		syp2het	herm	0
DLW195het	2022_02_04_DLW195het_555rad51_488gfpcosa1_dapi_herm2_01_stitched	106	26.3011	0.177119	5		syp2het	herm	0
DLW195het	2022_02_04_DLW195het_555rad51_488gfpcosa1_dapi_herm2_01_stitched	125	26.56	0.178863	5		syp2het	herm	0
DLW195het	2022_02_04_DLW195het_555rad51_488gfpcosa1_dapi_herm2_01_stitched	116	26.8898	0.181084	6		syp2het	herm	0
DLW195het	2022_02_04_DLW195het_555rad51_488gfpcosa1_dapi_herm2_01_stitched	140	28.1384	0.189492	13		syp2het	herm	0
DLW195het	2022_02_04_DLW195het_555rad51_488gfpcosa1_dapi_herm2_01_stitched	128	28.2183	0.190031	13		syp2het	herm	2
DLW195het	2022_02_04_DLW195het_555rad51_488gfpcosa1_dapi_herm2_01_stitched	121	28.5779	0.192452	5		syp2het	herm	1
DLW195het	2022_02_04_DLW195het_555rad51_488gfpcosa1_dapi_herm2_01_stitched	104	29.4484	0.198314	6		syp2het	herm	0
DLW195het	2022_02_04_DLW195het_555rad51_488gfpcosa1_dapi_herm2_01_stitched	134	30.3408	0.204324	9		syp2het	herm	0
DLW195het	2022_02_04_DLW195het_555rad51_488gfpcosa1_dapi_herm2_01_stitched	112	30.8023	0.207432	9		syp2het	herm	0
DLW195het	2022_02_04_DLW195het_555rad51_488gfpcosa1_dapi_herm2_01_stitched	113	32.3877	0.218108	5		syp2het	herm	1
DLW195het	2022_02_04_DLW195het_555rad51_488gfpcosa1_dapi_herm2_01_stitched	117	33.103	0.222926	13		syp2het	herm	1
DLW195het	2022_02_04_DLW195het_555rad51_488gfpcosa1_dapi_herm2_01_stitched	123	33.7232	0.227102	8		syp2het	herm	0
DLW195het	2022_02_04_DLW195het_555rad51_488gfpcosa1_dapi_herm2_01_stitched	110	34.7082	0.233735	7		syp2het	herm	2
DLW195het	2022_02_04_DLW195het_555rad51_488gfpcosa1_dapi_herm2_01_stitched	130	36.6553	0.246847	8		syp2het	herm	1
DLW195het	2022_02_04_DLW195het_555rad51_488gfpcosa1_dapi_herm2_01_stitched	103	36.9697	0.248965	9		syp2het	herm	0
DLW195het	2022_02_04_DLW195het_555rad51_488gfpcosa1_dapi_herm2_01_stitched	130	38.1258	0.256751	8		syp2het	herm	1
DLW195het	2022_02_04_DLW195het_555rad51_488gfpcosa1_dapi_herm2_01_stitched	96	38.2715	0.257731	7		syp2het	herm	0
DLW195het	2022_02_04_DLW195het_555rad51_488gfpcosa1_dapi_herm2_01_stitched	111	38.8515	0.261638	4		syp2het	herm	1
DLW195het	2022_02_04_DLW195het_555rad51_488gfpcosa1_dapi_herm2_01_stitched	115	40.1632	0.270471	3		syp2het	herm	2
DLW195het	2022_02_04_DLW195het_555rad51_488gfpcosa1_dapi_herm2_01_stitched	101	40.6554	0.273786	5		syp2het	herm	1
DLW195het	2022_02_04_DLW195het_555rad51_488gfpcosa1_dapi_herm2_01_stitched	98	43.3934	0.292224	12		syp2het	herm	0
DLW195het	2022_02_04_DLW195het_555rad51_488gfpcosa1_dapi_herm2_01_stitched	105	43.399	0.292262	5		syp2het	herm	0
DLW195het	2022_02_04_DLW195het_555rad51_488gfpcosa1_dapi_herm2_01_stitched	100	45.1162	0.303826	5		syp2het	herm	1
DLW195het	2022_02_04_DLW195het_555rad51_488gfpcosa1_dapi_herm2_01_stitched	102	45.7212	0.3079	5		syp2het	herm	0
DLW195het	2022_02_04_DLW195het_555rad51_488gfpcosa1_dapi_herm2_01_stitched	95	45.9955	0.309747	7		syp2het	herm	1
DLW195het	2022_02_04_DLW195het_555rad51_488gfpcosa1_dapi_herm2_01_stitched	109	47.1444	0.317484	4		syp2het	herm	0
DLW195het	2022_02_04_DLW195het_555rad51_488gfpcosa1_dapi_herm2_01_stitched	86	49.8812	0.335915	1		syp2het	herm	0
DLW195het	2022_02_04_DLW195het_555rad51_488gfpcosa1_dapi_herm2_01_stitched	91	49.9804	0.336583	10		syp2het	herm	2
DLW195het	2022_02_04_DLW195het_555rad51_488gfpcosa1_dapi_herm2_01_stitched	92	50.9021	0.34279	5		syp2het	herm	0
DLW195het	2022_02_04_DLW195het_555rad51_488gfpcosa1_dapi_herm2_01_stitched	88	52.5389	0.353813	5		syp2het	herm	1
DLW195het	2022_02_04_DLW195het_555rad51_488gfpcosa1_dapi_herm2_01_stitched	84	52.6664	0.354671	1		syp2het	herm	0
DLW195het	2022_02_04_DLW195het_555rad51_488gfpcosa1_dapi_herm2_01_stitched	77	56.2458	0.378776	4		syp2het	herm	1
DLW195het	2022_02_04_DLW195het_555rad51_488gfpcosa1_dapi_herm2_01_stitched	87	59.0008	0.397329	3		syp2het	herm	1
DLW195het	2022_02_04_DLW195het_555rad51_488gfpcosa1_dapi_herm2_01_stitched	93	60.3161	0.406186	2		syp2het	herm	0
DLW195het	2022_02_04_DLW195het_555rad51_488gfpcosa1_dapi_herm2_01_stitched	76	60.7837	0.409335	3		syp2het	herm	1
DLW195het	2022_02_04_DLW195het_555rad51_488gfpcosa1_dapi_herm2_01_stitched	78	61.414	0.41358	6		syp2het	herm	0
DLW195het	2022_02_04_DLW195het_555rad51_488gfpcosa1_dapi_herm2_01_stitched	79	63.4979	0.427614	6		syp2het	herm	2
DLW195het	2022_02_04_DLW195het_555rad51_488gfpcosa1_dapi_herm2_01_stitched	80	63.9107	0.430394	4		syp2het	herm	0
DLW195het	2022_02_04_DLW195het_555rad51_488gfpcosa1_dapi_herm2_01_stitched	90	66.1252	0.445307	8		syp2het	herm	0
DLW195het	2022_02_04_DLW195het_555rad51_488gfpcosa1_dapi_herm2_01_stitched	82	66.6129	0.448591	3		syp2het	herm	1
DLW195het	2022_02_04_DLW195het_555rad51_488gfpcosa1_dapi_herm2_01_stitched	83	67.0143	0.451294	8		syp2het	herm	0
DLW195het	2022_02_04_DLW195het_555rad51_488gfpcosa1_dapi_herm2_01_stitched	68	67.2494	0.452877	3		syp2het	herm	5
DLW195het	2022_02_04_DLW195het_555rad51_488gfpcosa1_dapi_herm2_01_stitched	72	67.8568	0.456968	8		syp2het	herm	1
DLW195het	2022_02_04_DLW195het_555rad51_488gfpcosa1_dapi_herm2_01_stitched	74	70.5205	0.474906	5		syp2het	herm	0
DLW195het	2022_02_04_DLW195het_555rad51_488gfpcosa1_dapi_herm2_01_stitched	85	71.3489	0.480485	4		syp2het	herm	0
DLW195het	2022_02_04_DLW195het_555rad51_488gfpcosa1_dapi_herm2_01_stitched	70	71.3809	0.4807	5		syp2het	herm	1
DLW195het	2022_02_04_DLW195het_555rad51_488gfpcosa1_dapi_herm2_01_stitched	63	73.821	0.497133	5		syp2het	herm	3
DLW195het	2022_02_04_DLW195het_555rad51_488gfpcosa1_dapi_herm2_01_stitched	75	74.173	0.499503	6		syp2het	herm	0
DLW195het	2022_02_04_DLW195het_555rad51_488gfpcosa1_dapi_herm2_01_stitched	65	74.384	0.500924	3		syp2het	herm	0
DLW195het	2022_02_04_DLW195het_555rad51_488gfpcosa1_dapi_herm2_01_stitched	67	77.6448	0.522883	5		syp2het	herm	0
DLW195het	2022_02_04_DLW195het_555rad51_488gfpcosa1_dapi_herm2_01_stitched	60	78.1476	0.526269	3		syp2het	herm	2
DLW195het	2022_02_04_DLW195het_555rad51_488gfpcosa1_dapi_herm2_01_stitched	69	78.3365	0.527541	1		syp2het	herm	4
DLW195het	2022_02_04_DLW195het_555rad51_488gfpcosa1_dapi_herm2_01_stitched	81	78.3826	0.527852	3		syp2het	herm	1
DLW195het	2022_02_04_DLW195het_555rad51_488gfpcosa1_dapi_herm2_01_stitched	52	80.7983	0.54412	9		syp2het	herm	3
DLW195het	2022_02_04_DLW195het_555rad51_488gfpcosa1_dapi_herm2_01_stitched	61	81.5432	0.549136	9		syp2het	herm	1
DLW195het	2022_02_04_DLW195het_555rad51_488gfpcosa1_dapi_herm2_01_stitched	71	82.545	0.555883	5		syp2het	herm	2
DLW195het	2022_02_04_DLW195het_555rad51_488gfpcosa1_dapi_herm2_01_stitched	66	84.1168	0.566468	6		syp2het	herm	4
DLW195het	2022_02_04_DLW195het_555rad51_488gfpcosa1_dapi_herm2_01_stitched	57	84.3089	0.567761	7		syp2het	herm	1
DLW195het	2022_02_04_DLW195het_555rad51_488gfpcosa1_dapi_herm2_01_stitched	53	85.2423	0.574047	6		syp2het	herm	5
DLW195het	2022_02_04_DLW195het_555rad51_488gfpcosa1_dapi_herm2_01_stitched	62	86.1749	0.580327	3		syp2het	herm	3
DLW195het	2022_02_04_DLW195het_555rad51_488gfpcosa1_dapi_herm2_01_stitched	73	87.4534	0.588937	9		syp2het	herm	4
DLW195het	2022_02_04_DLW195het_555rad51_488gfpcosa1_dapi_herm2_01_stitched	56	88.5549	0.596355	2		syp2het	herm	2
DLW195het	2022_02_04_DLW195het_555rad51_488gfpcosa1_dapi_herm2_01_stitched	50	90.7358	0.611042	4		syp2het	herm	5
DLW195het	2022_02_04_DLW195het_555rad51_488gfpcosa1_dapi_herm2_01_stitched	64	91.0049	0.612854	5		syp2het	herm	4
DLW195het	2022_02_04_DLW195het_555rad51_488gfpcosa1_dapi_herm2_01_stitched	51	93.08	0.626828	3		syp2het	herm	3
DLW195het	2022_02_04_DLW195het_555rad51_488gfpcosa1_dapi_herm2_01_stitched	54	94.1857	0.634275	3		syp2het	herm	4
DLW195het	2022_02_04_DLW195het_555rad51_488gfpcosa1_dapi_herm2_01_stitched	39	94.2384	0.63463	4		syp2het	herm	6
DLW195het	2022_02_04_DLW195het_555rad51_488gfpcosa1_dapi_herm2_01_stitched	49	94.8387	0.638672	5		syp2het	herm	5
DLW195het	2022_02_04_DLW195het_555rad51_488gfpcosa1_dapi_herm2_01_stitched	44	97.1794	0.654435	5		syp2het	herm	5
DLW195het	2022_02_04_DLW195het_555rad51_488gfpcosa1_dapi_herm2_01_stitched	58	98.0343	0.660192	15		syp2het	herm	3
DLW195het	2022_02_04_DLW195het_555rad51_488gfpcosa1_dapi_herm2_01_stitched	55	99.2746	0.668545	13		syp2het	herm	4
DLW195het	2022_02_04_DLW195het_555rad51_488gfpcosa1_dapi_herm2_01_stitched	40	99.7087	0.671468	9		syp2het	herm	4
DLW195het	2022_02_04_DLW195het_555rad51_488gfpcosa1_dapi_herm2_01_stitched	45	101.121	0.680981	4		syp2het	herm	5
DLW195het	2022_02_04_DLW195het_555rad51_488gfpcosa1_dapi_herm2_01_stitched	41	102.095	0.687541	9		syp2het	herm	6
DLW195het	2022_02_04_DLW195het_555rad51_488gfpcosa1_dapi_herm2_01_stitched	46	102.551	0.690609	3		syp2het	herm	6
DLW195het	2022_02_04_DLW195het_555rad51_488gfpcosa1_dapi_herm2_01_stitched	28	103.982	0.700245	8		syp2het	herm	4
DLW195het	2022_02_04_DLW195het_555rad51_488gfpcosa1_dapi_herm2_01_stitched	59	104.559	0.704129	8		syp2het	herm	5
DLW195het	2022_02_04_DLW195het_555rad51_488gfpcosa1_dapi_herm2_01_stitched	47	106.487	0.717112	7		syp2het	herm	5
DLW195het	2022_02_04_DLW195het_555rad51_488gfpcosa1_dapi_herm2_01_stitched	43	107.399	0.723257	2		syp2het	herm	5
DLW195het	2022_02_04_DLW195het_555rad51_488gfpcosa1_dapi_herm2_01_stitched	38	107.763	0.725709	3		syp2het	herm	6
DLW195het	2022_02_04_DLW195het_555rad51_488gfpcosa1_dapi_herm2_01_stitched	48	107.949	0.726964	2		syp2het	herm	6
DLW195het	2022_02_04_DLW195het_555rad51_488gfpcosa1_dapi_herm2_01_stitched	36	108.176	0.728491	5		syp2het	herm	6
DLW195het	2022_02_04_DLW195het_555rad51_488gfpcosa1_dapi_herm2_01_stitched	34	108.373	0.729816	6		syp2het	herm	6
DLW195het	2022_02_04_DLW195het_555rad51_488gfpcosa1_dapi_herm2_01_stitched	37	114.349	0.770063	4		syp2het	herm	6
DLW195het	2022_02_04_DLW195het_555rad51_488gfpcosa1_dapi_herm2_01_stitched	33	114.384	0.770295	5		syp2het	herm	6
DLW195het	2022_02_04_DLW195het_555rad51_488gfpcosa1_dapi_herm2_01_stitched	27	115.02	0.774578	7		syp2het	herm	6
DLW195het	2022_02_04_DLW195het_555rad51_488gfpcosa1_dapi_herm2_01_stitched	26	115.145	0.775421	4		syp2het	herm	6
DLW195het	2022_02_04_DLW195het_555rad51_488gfpcosa1_dapi_herm2_01_stitched	29	117.288	0.789855	0		syp2het	herm	6
DLW195het	2022_02_04_DLW195het_555rad51_488gfpcosa1_dapi_herm2_01_stitched	42	120.328	0.810325	2		syp2het	herm	5
DLW195het	2022_02_04_DLW195het_555rad51_488gfpcosa1_dapi_herm2_01_stitched	25	121.038	0.815105	5		syp2het	herm	6
DLW195het	2022_02_04_DLW195het_555rad51_488gfpcosa1_dapi_herm2_01_stitched	30	121.991	0.821527	2		syp2het	herm	6
DLW195het	2022_02_04_DLW195het_555rad51_488gfpcosa1_dapi_herm2_01_stitched	9	122.764	0.826728	2		syp2het	herm	6
DLW195het	2022_02_04_DLW195het_555rad51_488gfpcosa1_dapi_herm2_01_stitched	31	123.153	0.829349	5		syp2het	herm	6
DLW195het	2022_02_04_DLW195het_555rad51_488gfpcosa1_dapi_herm2_01_stitched	3	125.198	0.843119	1		syp2het	herm	6
DLW195het	2022_02_04_DLW195het_555rad51_488gfpcosa1_dapi_herm2_01_stitched	35	125.991	0.84846	2		syp2het	herm	6
DLW195het	2022_02_04_DLW195het_555rad51_488gfpcosa1_dapi_herm2_01_stitched	5	127.233	0.856824	0		syp2het	herm	6
DLW195het	2022_02_04_DLW195het_555rad51_488gfpcosa1_dapi_herm2_01_stitched	15	130.334	0.877706	5		syp2het	herm	6
DLW195het	2022_02_04_DLW195het_555rad51_488gfpcosa1_dapi_herm2_01_stitched	2	131.146	0.883178	0		syp2het	herm	6
DLW195het	2022_02_04_DLW195het_555rad51_488gfpcosa1_dapi_herm2_01_stitched	32	132.271	0.890753	3		syp2het	herm	6
DLW195het	2022_02_04_DLW195het_555rad51_488gfpcosa1_dapi_herm2_01_stitched	10	136.863	0.921678	1		syp2het	herm	6
DLW195het	2022_02_04_DLW195het_555rad51_488gfpcosa1_dapi_herm2_01_stitched	19	137.553	0.926325	0		syp2het	herm	6
DLW195het	2022_02_04_DLW195het_555rad51_488gfpcosa1_dapi_herm2_01_stitched	6	139.032	0.936286	1		syp2het	herm	6
DLW195het	2022_02_04_DLW195het_555rad51_488gfpcosa1_dapi_herm2_01_stitched	1	140.105	0.943505	3		syp2het	herm	6
DLW195het	2022_02_04_DLW195het_555rad51_488gfpcosa1_dapi_herm2_01_stitched	17	140.428	0.945681	1		syp2het	herm	6
DLW195het	2022_02_04_DLW195het_555rad51_488gfpcosa1_dapi_herm2_01_stitched	21	141.521	0.953042	3		syp2het	herm	6
DLW195het	2022_02_04_DLW195het_555rad51_488gfpcosa1_dapi_herm2_01_stitched	12	142.263	0.958043	0		syp2het	herm	6
DLW195het	2022_02_04_DLW195het_555rad51_488gfpcosa1_dapi_herm2_01_stitched	16	143.493	0.966321	1		syp2het	herm	6
DLW195het	2022_02_04_DLW195het_555rad51_488gfpcosa1_dapi_herm2_01_stitched	7	145.72	0.981323	1		syp2het	herm	6
DLW195het	2022_02_04_DLW195het_555rad51_488gfpcosa1_dapi_herm2_01_stitched	13	146.339	0.985494	0		syp2het	herm	6
DLW195het	2022_02_04_DLW195het_555rad51_488gfpcosa1_dapi_herm2_01_stitched	11	147.053	0.990299	0		syp2het	herm	6
DLW195het	2022_02_04_DLW195het_555rad51_488gfpcosa1_dapi_herm2_01_stitched	18	147.186	0.991191	0		syp2het	herm	6
DLW195het	2022_02_04_DLW195het_555rad51_488gfpcosa1_dapi_herm2_01_stitched	24	148.467	0.999824	1		syp2het	herm	6
DLW195het	2022_02_04_DLW195het_555rad51_488gfpcosa1_dapi_herm2_01_stitched	20	148.494	1	0		syp2het	herm	6
DLW195het	2022_02_04_DLW195het_555rad51_488gfpcosa1_dapi_herm2_01_stitched	22	148.494	1	0		syp2het	herm	6
DLW195het	2022_02_04_DLW195het_555rad51_488gfpcosa1_dapi_herm3_stitched	151	0.21885	0.00127141	9		syp2het	herm	0
DLW195het	2022_02_04_DLW195het_555rad51_488gfpcosa1_dapi_herm3_stitched	144	0.900486	0.00523137	6		syp2het	herm	1
DLW195het	2022_02_04_DLW195het_555rad51_488gfpcosa1_dapi_herm3_stitched	152	1.22183	0.00709824	3		syp2het	herm	0
DLW195het	2022_02_04_DLW195het_555rad51_488gfpcosa1_dapi_herm3_stitched	148	1.53529	0.00891928	9		syp2het	herm	0
DLW195het	2022_02_04_DLW195het_555rad51_488gfpcosa1_dapi_herm3_stitched	143	3.74926	0.0217813	5		syp2het	herm	0
DLW195het	2022_02_04_DLW195het_555rad51_488gfpcosa1_dapi_herm3_stitched	153	4.72714	0.0274623	2		syp2het	herm	0
DLW195het	2022_02_04_DLW195het_555rad51_488gfpcosa1_dapi_herm3_stitched	149	6.13459	0.0356388	8		syp2het	herm	1
DLW195het	2022_02_04_DLW195het_555rad51_488gfpcosa1_dapi_herm3_stitched	139	6.68069	0.0388114	11		syp2het	herm	0
DLW195het	2022_02_04_DLW195het_555rad51_488gfpcosa1_dapi_herm3_stitched	147	7.79789	0.0453018	3		syp2het	herm	0
DLW195het	2022_02_04_DLW195het_555rad51_488gfpcosa1_dapi_herm3_stitched	129	9.25627	0.0537743	6		syp2het	herm	1
DLW195het	2022_02_04_DLW195het_555rad51_488gfpcosa1_dapi_herm3_stitched	145	10.6306	0.0617584	7		syp2het	herm	0
DLW195het	2022_02_04_DLW195het_555rad51_488gfpcosa1_dapi_herm3_stitched	135	13.4388	0.0780724	4		syp2het	herm	0
DLW195het	2022_02_04_DLW195het_555rad51_488gfpcosa1_dapi_herm3_stitched	150	13.5514	0.0787269	9		syp2het	herm	0
DLW195het	2022_02_04_DLW195het_555rad51_488gfpcosa1_dapi_herm3_stitched	134	13.5679	0.0788229	8		syp2het	herm	0
DLW195het	2022_02_04_DLW195het_555rad51_488gfpcosa1_dapi_herm3_stitched	146	14.7337	0.0855956	6		syp2het	herm	0
DLW195het	2022_02_04_DLW195het_555rad51_488gfpcosa1_dapi_herm3_stitched	140	15.1567	0.0880527	4		syp2het	herm	0
DLW195het	2022_02_04_DLW195het_555rad51_488gfpcosa1_dapi_herm3_stitched	142	18.8277	0.109379	6		syp2het	herm	0
DLW195het	2022_02_04_DLW195het_555rad51_488gfpcosa1_dapi_herm3_stitched	141	20.5882	0.119607	2		syp2het	herm	0
DLW195het	2022_02_04_DLW195het_555rad51_488gfpcosa1_dapi_herm3_stitched	132	21.1933	0.123122	9		syp2het	herm	0
DLW195het	2022_02_04_DLW195het_555rad51_488gfpcosa1_dapi_herm3_stitched	131	21.4104	0.124383	3		syp2het	herm	0
DLW195het	2022_02_04_DLW195het_555rad51_488gfpcosa1_dapi_herm3_stitched	138	23.1348	0.134401	6		syp2het	herm	0
DLW195het	2022_02_04_DLW195het_555rad51_488gfpcosa1_dapi_herm3_stitched	136	25.6717	0.14914	9		syp2het	herm	0
DLW195het	2022_02_04_DLW195het_555rad51_488gfpcosa1_dapi_herm3_stitched	130	26.6053	0.154563	4		syp2het	herm	0
DLW195het	2022_02_04_DLW195het_555rad51_488gfpcosa1_dapi_herm3_stitched	133	27.5668	0.160149	8		syp2het	herm	0
DLW195het	2022_02_04_DLW195het_555rad51_488gfpcosa1_dapi_herm3_stitched	122	28.1586	0.163587	4		syp2het	herm	1
DLW195het	2022_02_04_DLW195het_555rad51_488gfpcosa1_dapi_herm3_stitched	127	28.8369	0.167528	4		syp2het	herm	0
DLW195het	2022_02_04_DLW195het_555rad51_488gfpcosa1_dapi_herm3_stitched	125	29.3595	0.170564	3		syp2het	herm	0
DLW195het	2022_02_04_DLW195het_555rad51_488gfpcosa1_dapi_herm3_stitched	137	30.0188	0.174394	6		syp2het	herm	0
DLW195het	2022_02_04_DLW195het_555rad51_488gfpcosa1_dapi_herm3_stitched	124	31.5898	0.183521	5		syp2het	herm	1
DLW195het	2022_02_04_DLW195het_555rad51_488gfpcosa1_dapi_herm3_stitched	126	32.1844	0.186975	1		syp2het	herm	0
DLW195het	2022_02_04_DLW195het_555rad51_488gfpcosa1_dapi_herm3_stitched	128	33.7335	0.195974	4		syp2het	herm	0
DLW195het	2022_02_04_DLW195het_555rad51_488gfpcosa1_dapi_herm3_stitched	123	34.0603	0.197873	5		syp2het	herm	0
DLW195het	2022_02_04_DLW195het_555rad51_488gfpcosa1_dapi_herm3_stitched	116	35.2726	0.204916	4		syp2het	herm	0
DLW195het	2022_02_04_DLW195het_555rad51_488gfpcosa1_dapi_herm3_stitched	113	35.7873	0.207906	2		syp2het	herm	0
DLW195het	2022_02_04_DLW195het_555rad51_488gfpcosa1_dapi_herm3_stitched	121	36.0306	0.20932	4		syp2het	herm	0
DLW195het	2022_02_04_DLW195het_555rad51_488gfpcosa1_dapi_herm3_stitched	114	39.0723	0.22699	8		syp2het	herm	0
DLW195het	2022_02_04_DLW195het_555rad51_488gfpcosa1_dapi_herm3_stitched	119	40.2598	0.233889	4		syp2het	herm	0
DLW195het	2022_02_04_DLW195het_555rad51_488gfpcosa1_dapi_herm3_stitched	118	42.3557	0.246065	2		syp2het	herm	0
DLW195het	2022_02_04_DLW195het_555rad51_488gfpcosa1_dapi_herm3_stitched	115	42.4226	0.246454	4		syp2het	herm	0
DLW195het	2022_02_04_DLW195het_555rad51_488gfpcosa1_dapi_herm3_stitched	108	42.9336	0.249423	4		syp2het	herm	0
DLW195het	2022_02_04_DLW195het_555rad51_488gfpcosa1_dapi_herm3_stitched	104	43.2205	0.251089	6		syp2het	herm	0
DLW195het	2022_02_04_DLW195het_555rad51_488gfpcosa1_dapi_herm3_stitched	120	44.1504	0.256491	5		syp2het	herm	0
DLW195het	2022_02_04_DLW195het_555rad51_488gfpcosa1_dapi_herm3_stitched	111	44.5036	0.258543	6		syp2het	herm	0
DLW195het	2022_02_04_DLW195het_555rad51_488gfpcosa1_dapi_herm3_stitched	112	47.243	0.274458	9		syp2het	herm	0
DLW195het	2022_02_04_DLW195het_555rad51_488gfpcosa1_dapi_herm3_stitched	105	49.4885	0.287503	1		syp2het	herm	0
DLW195het	2022_02_04_DLW195het_555rad51_488gfpcosa1_dapi_herm3_stitched	110	49.8103	0.289373	4		syp2het	herm	0
DLW195het	2022_02_04_DLW195het_555rad51_488gfpcosa1_dapi_herm3_stitched	117	50.2081	0.291684	2		syp2het	herm	0
DLW195het	2022_02_04_DLW195het_555rad51_488gfpcosa1_dapi_herm3_stitched	94	50.9251	0.295849	4		syp2het	herm	0
DLW195het	2022_02_04_DLW195het_555rad51_488gfpcosa1_dapi_herm3_stitched	102	51.2662	0.297831	8		syp2het	herm	0
DLW195het	2022_02_04_DLW195het_555rad51_488gfpcosa1_dapi_herm3_stitched	109	54.0188	0.313822	2		syp2het	herm	0
DLW195het	2022_02_04_DLW195het_555rad51_488gfpcosa1_dapi_herm3_stitched	93	54.6464	0.317468	8		syp2het	herm	0
DLW195het	2022_02_04_DLW195het_555rad51_488gfpcosa1_dapi_herm3_stitched	97	55.9618	0.32511	9		syp2het	herm	0
DLW195het	2022_02_04_DLW195het_555rad51_488gfpcosa1_dapi_herm3_stitched	101	56.7492	0.329684	1		syp2het	herm	0
DLW195het	2022_02_04_DLW195het_555rad51_488gfpcosa1_dapi_herm3_stitched	95	58.4646	0.33965	6		syp2het	herm	1
DLW195het	2022_02_04_DLW195het_555rad51_488gfpcosa1_dapi_herm3_stitched	107	59.0131	0.342837	2		syp2het	herm	0
DLW195het	2022_02_04_DLW195het_555rad51_488gfpcosa1_dapi_herm3_stitched	98	59.8922	0.347944	4		syp2het	herm	2
DLW195het	2022_02_04_DLW195het_555rad51_488gfpcosa1_dapi_herm3_stitched	103	60.3094	0.350367	3		syp2het	herm	0
DLW195het	2022_02_04_DLW195het_555rad51_488gfpcosa1_dapi_herm3_stitched	99	61.7067	0.358485	8		syp2het	herm	0
DLW195het	2022_02_04_DLW195het_555rad51_488gfpcosa1_dapi_herm3_stitched	88	61.9816	0.360082	4		syp2het	herm	1
DLW195het	2022_02_04_DLW195het_555rad51_488gfpcosa1_dapi_herm3_stitched	84	62.5074	0.363136	2		syp2het	herm	1
DLW195het	2022_02_04_DLW195het_555rad51_488gfpcosa1_dapi_herm3_stitched	90	65.6103	0.381163	7		syp2het	herm	0
DLW195het	2022_02_04_DLW195het_555rad51_488gfpcosa1_dapi_herm3_stitched	92	66.4753	0.386188	6		syp2het	herm	0
DLW195het	2022_02_04_DLW195het_555rad51_488gfpcosa1_dapi_herm3_stitched	106	67.3714	0.391394	4		syp2het	herm	1
DLW195het	2022_02_04_DLW195het_555rad51_488gfpcosa1_dapi_herm3_stitched	100	67.5791	0.392601	8		syp2het	herm	0
DLW195het	2022_02_04_DLW195het_555rad51_488gfpcosa1_dapi_herm3_stitched	89	69.8744	0.405935	4		syp2het	herm	4
DLW195het	2022_02_04_DLW195het_555rad51_488gfpcosa1_dapi_herm3_stitched	91	70.3166	0.408504	2		syp2het	herm	0
DLW195het	2022_02_04_DLW195het_555rad51_488gfpcosa1_dapi_herm3_stitched	83	70.4669	0.409377	2		syp2het	herm	1
DLW195het	2022_02_04_DLW195het_555rad51_488gfpcosa1_dapi_herm3_stitched	86	73.3201	0.425953	8		syp2het	herm	1
DLW195het	2022_02_04_DLW195het_555rad51_488gfpcosa1_dapi_herm3_stitched	96	75.1025	0.436307	4		syp2het	herm	0
DLW195het	2022_02_04_DLW195het_555rad51_488gfpcosa1_dapi_herm3_stitched	71	75.1049	0.436322	11		syp2het	herm	1
DLW195het	2022_02_04_DLW195het_555rad51_488gfpcosa1_dapi_herm3_stitched	75	76.8146	0.446254	8		syp2het	herm	0
DLW195het	2022_02_04_DLW195het_555rad51_488gfpcosa1_dapi_herm3_stitched	87	77.8914	0.45251	4		syp2het	herm	4
DLW195het	2022_02_04_DLW195het_555rad51_488gfpcosa1_dapi_herm3_stitched	82	79.0711	0.459363	5		syp2het	herm	0
DLW195het	2022_02_04_DLW195het_555rad51_488gfpcosa1_dapi_herm3_stitched	76	79.1656	0.459912	2		syp2het	herm	1
DLW195het	2022_02_04_DLW195het_555rad51_488gfpcosa1_dapi_herm3_stitched	69	81.9198	0.475913	3		syp2het	herm	2
DLW195het	2022_02_04_DLW195het_555rad51_488gfpcosa1_dapi_herm3_stitched	81	82.6816	0.480338	6		syp2het	herm	4
DLW195het	2022_02_04_DLW195het_555rad51_488gfpcosa1_dapi_herm3_stitched	68	85.4366	0.496343	5		syp2het	herm	2
DLW195het	2022_02_04_DLW195het_555rad51_488gfpcosa1_dapi_herm3_stitched	78	86.094	0.500163	5		syp2het	herm	1
DLW195het	2022_02_04_DLW195het_555rad51_488gfpcosa1_dapi_herm3_stitched	73	86.3888	0.501876	1		syp2het	herm	5
DLW195het	2022_02_04_DLW195het_555rad51_488gfpcosa1_dapi_herm3_stitched	72	87.0571	0.505758	3		syp2het	herm	4
DLW195het	2022_02_04_DLW195het_555rad51_488gfpcosa1_dapi_herm3_stitched	85	88.4311	0.51374	7		syp2het	herm	4
DLW195het	2022_02_04_DLW195het_555rad51_488gfpcosa1_dapi_herm3_stitched	77	89.2815	0.51868	5		syp2het	herm	5
DLW195het	2022_02_04_DLW195het_555rad51_488gfpcosa1_dapi_herm3_stitched	74	89.6304	0.520707	5		syp2het	herm	4
DLW195het	2022_02_04_DLW195het_555rad51_488gfpcosa1_dapi_herm3_stitched	79	90.658	0.526677	11		syp2het	herm	3
DLW195het	2022_02_04_DLW195het_555rad51_488gfpcosa1_dapi_herm3_stitched	56	92.9642	0.540075	1		syp2het	herm	6
DLW195het	2022_02_04_DLW195het_555rad51_488gfpcosa1_dapi_herm3_stitched	61	94.4436	0.548669	1		syp2het	herm	6
DLW195het	2022_02_04_DLW195het_555rad51_488gfpcosa1_dapi_herm3_stitched	65	94.5818	0.549472	2		syp2het	herm	2
DLW195het	2022_02_04_DLW195het_555rad51_488gfpcosa1_dapi_herm3_stitched	80	95.3951	0.554197	5		syp2het	herm	5
DLW195het	2022_02_04_DLW195het_555rad51_488gfpcosa1_dapi_herm3_stitched	63	97.0888	0.564037	7		syp2het	herm	4
DLW195het	2022_02_04_DLW195het_555rad51_488gfpcosa1_dapi_herm3_stitched	70	97.5732	0.566851	3		syp2het	herm	6
DLW195het	2022_02_04_DLW195het_555rad51_488gfpcosa1_dapi_herm3_stitched	64	98.9301	0.574734	5		syp2het	herm	2
DLW195het	2022_02_04_DLW195het_555rad51_488gfpcosa1_dapi_herm3_stitched	50	100.694	0.584979	5		syp2het	herm	4
DLW195het	2022_02_04_DLW195het_555rad51_488gfpcosa1_dapi_herm3_stitched	58	101.952	0.59229	3		syp2het	herm	6
DLW195het	2022_02_04_DLW195het_555rad51_488gfpcosa1_dapi_herm3_stitched	67	102.048	0.592848	5		syp2het	herm	6
DLW195het	2022_02_04_DLW195het_555rad51_488gfpcosa1_dapi_herm3_stitched	66	103.623	0.601996	5		syp2het	herm	6
DLW195het	2022_02_04_DLW195het_555rad51_488gfpcosa1_dapi_herm3_stitched	55	104.93	0.609591	3		syp2het	herm	6
DLW195het	2022_02_04_DLW195het_555rad51_488gfpcosa1_dapi_herm3_stitched	57	105.447	0.612591	1		syp2het	herm	6
DLW195het	2022_02_04_DLW195het_555rad51_488gfpcosa1_dapi_herm3_stitched	51	105.468	0.612713	2		syp2het	herm	6
DLW195het	2022_02_04_DLW195het_555rad51_488gfpcosa1_dapi_herm3_stitched	39	108.68	0.631375	1		syp2het	herm	6
DLW195het	2022_02_04_DLW195het_555rad51_488gfpcosa1_dapi_herm3_stitched	47	108.714	0.631574	0		syp2het	herm	6
DLW195het	2022_02_04_DLW195het_555rad51_488gfpcosa1_dapi_herm3_stitched	53	110.432	0.641552	4		syp2het	herm	6
DLW195het	2022_02_04_DLW195het_555rad51_488gfpcosa1_dapi_herm3_stitched	59	110.79	0.643635	3		syp2het	herm	6
DLW195het	2022_02_04_DLW195het_555rad51_488gfpcosa1_dapi_herm3_stitched	60	110.815	0.643779	2		syp2het	herm	5
DLW195het	2022_02_04_DLW195het_555rad51_488gfpcosa1_dapi_herm3_stitched	49	112.016	0.650754	3		syp2het	herm	6
DLW195het	2022_02_04_DLW195het_555rad51_488gfpcosa1_dapi_herm3_stitched	54	113.044	0.656729	13		syp2het	herm	0
DLW195het	2022_02_04_DLW195het_555rad51_488gfpcosa1_dapi_herm3_stitched	62	114.632	0.665953	5		syp2het	herm	6
DLW195het	2022_02_04_DLW195het_555rad51_488gfpcosa1_dapi_herm3_stitched	46	116.206	0.675099	4		syp2het	herm	6
DLW195het	2022_02_04_DLW195het_555rad51_488gfpcosa1_dapi_herm3_stitched	46	116.711	0.678032	4		syp2het	herm	6
DLW195het	2022_02_04_DLW195het_555rad51_488gfpcosa1_dapi_herm3_stitched	32	116.931	0.679312	2		syp2het	herm	6
DLW195het	2022_02_04_DLW195het_555rad51_488gfpcosa1_dapi_herm3_stitched	52	117.607	0.683234	2		syp2het	herm	6
DLW195het	2022_02_04_DLW195het_555rad51_488gfpcosa1_dapi_herm3_stitched	45	118.487	0.688353	2		syp2het	herm	6
DLW195het	2022_02_04_DLW195het_555rad51_488gfpcosa1_dapi_herm3_stitched	41	119.944	0.696813	1		syp2het	herm	6
DLW195het	2022_02_04_DLW195het_555rad51_488gfpcosa1_dapi_herm3_stitched	33	121.821	0.707719	1		syp2het	herm	6
DLW195het	2022_02_04_DLW195het_555rad51_488gfpcosa1_dapi_herm3_stitched	36	122.274	0.710351	0		syp2het	herm	6
DLW195het	2022_02_04_DLW195het_555rad51_488gfpcosa1_dapi_herm3_stitched	48	122.508	0.71171	4		syp2het	herm	6
DLW195het	2022_02_04_DLW195het_555rad51_488gfpcosa1_dapi_herm3_stitched	42	126.452	0.73462	2		syp2het	herm	5
DLW195het	2022_02_04_DLW195het_555rad51_488gfpcosa1_dapi_herm3_stitched	34	128.054	0.743931	0		syp2het	herm	6
DLW195het	2022_02_04_DLW195het_555rad51_488gfpcosa1_dapi_herm3_stitched	37	128.466	0.746322	4		syp2het	herm	6
DLW195het	2022_02_04_DLW195het_555rad51_488gfpcosa1_dapi_herm3_stitched	27	128.689	0.747619	0		syp2het	herm	6
DLW195het	2022_02_04_DLW195het_555rad51_488gfpcosa1_dapi_herm3_stitched	30	131.325	0.762931	2		syp2het	herm	6
DLW195het	2022_02_04_DLW195het_555rad51_488gfpcosa1_dapi_herm3_stitched	43	132.372	0.769013	1		syp2het	herm	6
DLW195het	2022_02_04_DLW195het_555rad51_488gfpcosa1_dapi_herm3_stitched	31	133.523	0.775704	9		syp2het	herm	5
DLW195het	2022_02_04_DLW195het_555rad51_488gfpcosa1_dapi_herm3_stitched	35	134.366	0.780597	1		syp2het	herm	6
DLW195het	2022_02_04_DLW195het_555rad51_488gfpcosa1_dapi_herm3_stitched	22	134.481	0.781266	1		syp2het	herm	6
DLW195het	2022_02_04_DLW195het_555rad51_488gfpcosa1_dapi_herm3_stitched	17	135.257	0.785773	1		syp2het	herm	6
DLW195het	2022_02_04_DLW195het_555rad51_488gfpcosa1_dapi_herm3_stitched	22	137.047	0.796176	1		syp2het	herm	6
DLW195het	2022_02_04_DLW195het_555rad51_488gfpcosa1_dapi_herm3_stitched	40	139.199	0.808675	3		syp2het	herm	6
DLW195het	2022_02_04_DLW195het_555rad51_488gfpcosa1_dapi_herm3_stitched	23	139.285	0.809175	1		syp2het	herm	6
DLW195het	2022_02_04_DLW195het_555rad51_488gfpcosa1_dapi_herm3_stitched	28	140.201	0.814497	2		syp2het	herm	6
DLW195het	2022_02_04_DLW195het_555rad51_488gfpcosa1_dapi_herm3_stitched	38	140.67	0.817221	3		syp2het	herm	6
DLW195het	2022_02_04_DLW195het_555rad51_488gfpcosa1_dapi_herm3_stitched	21	140.899	0.818555	1		syp2het	herm	6
DLW195het	2022_02_04_DLW195het_555rad51_488gfpcosa1_dapi_herm3_stitched	13	142.414	0.827353	0		syp2het	herm	6
DLW195het	2022_02_04_DLW195het_555rad51_488gfpcosa1_dapi_herm3_stitched	12	144.636	0.840261	9		syp2het	herm	6
DLW195het	2022_02_04_DLW195het_555rad51_488gfpcosa1_dapi_herm3_stitched	25	146.236	0.84956	2		syp2het	herm	6
DLW195het	2022_02_04_DLW195het_555rad51_488gfpcosa1_dapi_herm3_stitched	24	147.513	0.856977	1		syp2het	herm	6
DLW195het	2022_02_04_DLW195het_555rad51_488gfpcosa1_dapi_herm3_stitched	15	150.681	0.875378	2		syp2het	herm	6
DLW195het	2022_02_04_DLW195het_555rad51_488gfpcosa1_dapi_herm3_stitched	29	150.857	0.876404	0		syp2het	herm	6
DLW195het	2022_02_04_DLW195het_555rad51_488gfpcosa1_dapi_herm3_stitched	26	151.807	0.88192	3		syp2het	herm	6
DLW195het	2022_02_04_DLW195het_555rad51_488gfpcosa1_dapi_herm3_stitched	16	151.969	0.882861	0		syp2het	herm	5
DLW195het	2022_02_04_DLW195het_555rad51_488gfpcosa1_dapi_herm3_stitched	9	152.417	0.885467	2		syp2het	herm	6
DLW195het	2022_02_04_DLW195het_555rad51_488gfpcosa1_dapi_herm3_stitched	11	155.687	0.904464	1		syp2het	herm	6
DLW195het	2022_02_04_DLW195het_555rad51_488gfpcosa1_dapi_herm3_stitched	14	157.213	0.913331	0		syp2het	herm	6
DLW195het	2022_02_04_DLW195het_555rad51_488gfpcosa1_dapi_herm3_stitched	19	158.574	0.921235	1		syp2het	herm	6
DLW195het	2022_02_04_DLW195het_555rad51_488gfpcosa1_dapi_herm3_stitched	18	159.14	0.924522	1		syp2het	herm	6
DLW195het	2022_02_04_DLW195het_555rad51_488gfpcosa1_dapi_herm3_stitched	4	160.068	0.929916	0		syp2het	herm	6
DLW195het	2022_02_04_DLW195het_555rad51_488gfpcosa1_dapi_herm3_stitched	3	162.212	0.942372	0		syp2het	herm	6
DLW195het	2022_02_04_DLW195het_555rad51_488gfpcosa1_dapi_herm3_stitched	7	162.425	0.94361	1		syp2het	herm	6
DLW195het	2022_02_04_DLW195het_555rad51_488gfpcosa1_dapi_herm3_stitched	10	163.47	0.949678	0		syp2het	herm	6
DLW195het	2022_02_04_DLW195het_555rad51_488gfpcosa1_dapi_herm3_stitched	6	166.988	0.970118	0		syp2het	herm	6
DLW195het	2022_02_04_DLW195het_555rad51_488gfpcosa1_dapi_herm3_stitched	5	168.273	0.977583	0		syp2het	herm	6
DLW195het	2022_02_04_DLW195het_555rad51_488gfpcosa1_dapi_herm3_stitched	8	168.347	0.978009	0		syp2het	herm	6
DLW195het	2022_02_04_DLW195het_555rad51_488gfpcosa1_dapi_herm3_stitched	2	170.446	0.990204	0		syp2het	herm	6
DLW195het	2022_02_04_DLW195het_555rad51_488gfpcosa1_dapi_herm6_stitched	123	0.984166	0.00609337	1		syp2het	herm	0
DLW195het	2022_02_04_DLW195het_555rad51_488gfpcosa1_dapi_herm6_stitched	127	1.47613	0.00913931	2		syp2het	herm	0
DLW195het	2022_02_04_DLW195het_555rad51_488gfpcosa1_dapi_herm6_stitched	178	2.62126	0.0162293	2		syp2het	herm	0
DLW195het	2022_02_04_DLW195het_555rad51_488gfpcosa1_dapi_herm6_stitched	130	5.032	0.0311552	7		syp2het	herm	0
DLW195het	2022_02_04_DLW195het_555rad51_488gfpcosa1_dapi_herm6_stitched	124	5.09323	0.0315343	6		syp2het	herm	0
DLW195het	2022_02_04_DLW195het_555rad51_488gfpcosa1_dapi_herm6_stitched	125	5.90025	0.0365308	7		syp2het	herm	0
DLW195het	2022_02_04_DLW195het_555rad51_488gfpcosa1_dapi_herm6_stitched	133	9.0031	0.0557418	4		syp2het	herm	3
DLW195het	2022_02_04_DLW195het_555rad51_488gfpcosa1_dapi_herm6_stitched	129	9.94013	0.0615433	11		syp2het	herm	0
DLW195het	2022_02_04_DLW195het_555rad51_488gfpcosa1_dapi_herm6_stitched	136	10.0462	0.0621999	3		syp2het	herm	0
DLW195het	2022_02_04_DLW195het_555rad51_488gfpcosa1_dapi_herm6_stitched	126	10.2457	0.0634352	4		syp2het	herm	0
DLW195het	2022_02_04_DLW195het_555rad51_488gfpcosa1_dapi_herm6_stitched	181	11.1414	0.0689811	4		syp2het	herm	0
DLW195het	2022_02_04_DLW195het_555rad51_488gfpcosa1_dapi_herm6_stitched	134	12.478	0.0772562	4		syp2het	herm	0
DLW195het	2022_02_04_DLW195het_555rad51_488gfpcosa1_dapi_herm6_stitched	140	14.271	0.0883573	5		syp2het	herm	0
DLW195het	2022_02_04_DLW195het_555rad51_488gfpcosa1_dapi_herm6_stitched	131	14.7032	0.0910335	6		syp2het	herm	0
DLW195het	2022_02_04_DLW195het_555rad51_488gfpcosa1_dapi_herm6_stitched	128	14.8885	0.0921809	3		syp2het	herm	0
DLW195het	2022_02_04_DLW195het_555rad51_488gfpcosa1_dapi_herm6_stitched	138	16.9851	0.105162	3		syp2het	herm	0
DLW195het	2022_02_04_DLW195het_555rad51_488gfpcosa1_dapi_herm6_stitched	180	17.0523	0.105578	3		syp2het	herm	0
DLW195het	2022_02_04_DLW195het_555rad51_488gfpcosa1_dapi_herm6_stitched	132	18.8146	0.116489	9		syp2het	herm	0
DLW195het	2022_02_04_DLW195het_555rad51_488gfpcosa1_dapi_herm6_stitched	144	19.0849	0.118162	4		syp2het	herm	0
DLW195het	2022_02_04_DLW195het_555rad51_488gfpcosa1_dapi_herm6_stitched	135	19.2615	0.119256	10		syp2het	herm	0
DLW195het	2022_02_04_DLW195het_555rad51_488gfpcosa1_dapi_herm6_stitched	179	20.4691	0.126732	7		syp2het	herm	0
DLW195het	2022_02_04_DLW195het_555rad51_488gfpcosa1_dapi_herm6_stitched	142	21.2758	0.131727	8		syp2het	herm	0
DLW195het	2022_02_04_DLW195het_555rad51_488gfpcosa1_dapi_herm6_stitched	137	22.8927	0.141738	2		syp2het	herm	0
DLW195het	2022_02_04_DLW195het_555rad51_488gfpcosa1_dapi_herm6_stitched	182	23.734	0.146947	6		syp2het	herm	0
DLW195het	2022_02_04_DLW195het_555rad51_488gfpcosa1_dapi_herm6_stitched	188	24.9685	0.15459	5		syp2het	herm	0
DLW195het	2022_02_04_DLW195het_555rad51_488gfpcosa1_dapi_herm6_stitched	151	25.1448	0.155682	1		syp2het	herm	0
DLW195het	2022_02_04_DLW195het_555rad51_488gfpcosa1_dapi_herm6_stitched	185	25.285	0.15655	8		syp2het	herm	0
DLW195het	2022_02_04_DLW195het_555rad51_488gfpcosa1_dapi_herm6_stitched	147	26.4246	0.163605	6		syp2het	herm	0
DLW195het	2022_02_04_DLW195het_555rad51_488gfpcosa1_dapi_herm6_stitched	139	27.6528	0.17121	6		syp2het	herm	0
DLW195het	2022_02_04_DLW195het_555rad51_488gfpcosa1_dapi_herm6_stitched	184	27.8237	0.172268	8		syp2het	herm	0
DLW195het	2022_02_04_DLW195het_555rad51_488gfpcosa1_dapi_herm6_stitched	148	28.5319	0.176653	3		syp2het	herm	0
DLW195het	2022_02_04_DLW195het_555rad51_488gfpcosa1_dapi_herm6_stitched	187	28.8216	0.178446	6		syp2het	herm	0
DLW195het	2022_02_04_DLW195het_555rad51_488gfpcosa1_dapi_herm6_stitched	156	30.2319	0.187178	5		syp2het	herm	0
DLW195het	2022_02_04_DLW195het_555rad51_488gfpcosa1_dapi_herm6_stitched	141	30.2389	0.187221	7		syp2het	herm	0
DLW195het	2022_02_04_DLW195het_555rad51_488gfpcosa1_dapi_herm6_stitched	183	30.4471	0.188511	13		syp2het	herm	0
DLW195het	2022_02_04_DLW195het_555rad51_488gfpcosa1_dapi_herm6_stitched	146	30.9736	0.19177	5		syp2het	herm	0
DLW195het	2022_02_04_DLW195het_555rad51_488gfpcosa1_dapi_herm6_stitched	153	31.2771	0.193649	6		syp2het	herm	0
DLW195het	2022_02_04_DLW195het_555rad51_488gfpcosa1_dapi_herm6_stitched	186	32.6112	0.201909	4		syp2het	herm	0
DLW195het	2022_02_04_DLW195het_555rad51_488gfpcosa1_dapi_herm6_stitched	155	33.2611	0.205933	2		syp2het	herm	0
DLW195het	2022_02_04_DLW195het_555rad51_488gfpcosa1_dapi_herm6_stitched	143	33.4097	0.206853	4		syp2het	herm	0
DLW195het	2022_02_04_DLW195het_555rad51_488gfpcosa1_dapi_herm6_stitched	162	34.9677	0.216499	5		syp2het	herm	0
DLW195het	2022_02_04_DLW195het_555rad51_488gfpcosa1_dapi_herm6_stitched	150	35.4827	0.219688	13		syp2het	herm	0
DLW195het	2022_02_04_DLW195het_555rad51_488gfpcosa1_dapi_herm6_stitched	145	35.814	0.221739	8		syp2het	herm	0
DLW195het	2022_02_04_DLW195het_555rad51_488gfpcosa1_dapi_herm6_stitched	158	35.9937	0.222851	6		syp2het	herm	0
DLW195het	2022_02_04_DLW195het_555rad51_488gfpcosa1_dapi_herm6_stitched	190	38.2627	0.2369	5		syp2het	herm	0
DLW195het	2022_02_04_DLW195het_555rad51_488gfpcosa1_dapi_herm6_stitched	149	38.7606	0.239983	6		syp2het	herm	0
DLW195het	2022_02_04_DLW195het_555rad51_488gfpcosa1_dapi_herm6_stitched	161	38.862	0.240611	9		syp2het	herm	0
DLW195het	2022_02_04_DLW195het_555rad51_488gfpcosa1_dapi_herm6_stitched	154	38.8825	0.240737	6		syp2het	herm	0
DLW195het	2022_02_04_DLW195het_555rad51_488gfpcosa1_dapi_herm6_stitched	191	39.2261	0.242865	1		syp2het	herm	0
DLW195het	2022_02_04_DLW195het_555rad51_488gfpcosa1_dapi_herm6_stitched	164	40.5849	0.251278	9		syp2het	herm	0
DLW195het	2022_02_04_DLW195het_555rad51_488gfpcosa1_dapi_herm6_stitched	189	41.2301	0.255272	6		syp2het	herm	0
DLW195het	2022_02_04_DLW195het_555rad51_488gfpcosa1_dapi_herm6_stitched	159	41.3969	0.256305	12		syp2het	herm	0
DLW195het	2022_02_04_DLW195het_555rad51_488gfpcosa1_dapi_herm6_stitched	152	41.9748	0.259883	6		syp2het	herm	0
DLW195het	2022_02_04_DLW195het_555rad51_488gfpcosa1_dapi_herm6_stitched	194	42.519	0.263252	9		syp2het	herm	0
DLW195het	2022_02_04_DLW195het_555rad51_488gfpcosa1_dapi_herm6_stitched	165	43.4007	0.268711	7		syp2het	herm	0
DLW195het	2022_02_04_DLW195het_555rad51_488gfpcosa1_dapi_herm6_stitched	157	43.5901	0.269884	10		syp2het	herm	0
DLW195het	2022_02_04_DLW195het_555rad51_488gfpcosa1_dapi_herm6_stitched	166	46.4515	0.2876	10		syp2het	herm	0
DLW195het	2022_02_04_DLW195het_555rad51_488gfpcosa1_dapi_herm6_stitched	160	47.0324	0.291197	1		syp2het	herm	0
DLW195het	2022_02_04_DLW195het_555rad51_488gfpcosa1_dapi_herm6_stitched	192	47.9407	0.296821	4		syp2het	herm	0
DLW195het	2022_02_04_DLW195het_555rad51_488gfpcosa1_dapi_herm6_stitched	170	49.2183	0.304731	4		syp2het	herm	0
DLW195het	2022_02_04_DLW195het_555rad51_488gfpcosa1_dapi_herm6_stitched	167	49.8703	0.308768	5		syp2het	herm	0
DLW195het	2022_02_04_DLW195het_555rad51_488gfpcosa1_dapi_herm6_stitched	171	50.5544	0.313003	2		syp2het	herm	0
DLW195het	2022_02_04_DLW195het_555rad51_488gfpcosa1_dapi_herm6_stitched	196	50.8377	0.314757	6		syp2het	herm	0
DLW195het	2022_02_04_DLW195het_555rad51_488gfpcosa1_dapi_herm6_stitched	163	51.0667	0.316175	12		syp2het	herm	0
DLW195het	2022_02_04_DLW195het_555rad51_488gfpcosa1_dapi_herm6_stitched	172	52.2969	0.323791	5		syp2het	herm	0
DLW195het	2022_02_04_DLW195het_555rad51_488gfpcosa1_dapi_herm6_stitched	169	52.4141	0.324517	5		syp2het	herm	0
DLW195het	2022_02_04_DLW195het_555rad51_488gfpcosa1_dapi_herm6_stitched	193	53.2194	0.329503	12		syp2het	herm	0
DLW195het	2022_02_04_DLW195het_555rad51_488gfpcosa1_dapi_herm6_stitched	199	54.884	0.339809	4		syp2het	herm	0
DLW195het	2022_02_04_DLW195het_555rad51_488gfpcosa1_dapi_herm6_stitched	195	55.0114	0.340598	2		syp2het	herm	0
DLW195het	2022_02_04_DLW195het_555rad51_488gfpcosa1_dapi_herm6_stitched	168	55.7992	0.345476	1		syp2het	herm	0
DLW195het	2022_02_04_DLW195het_555rad51_488gfpcosa1_dapi_herm6_stitched	175	56.5487	0.350116	11		syp2het	herm	0
DLW195het	2022_02_04_DLW195het_555rad51_488gfpcosa1_dapi_herm6_stitched	198	56.6147	0.350525	1		syp2het	herm	0
DLW195het	2022_02_04_DLW195het_555rad51_488gfpcosa1_dapi_herm6_stitched	197	57.5412	0.356261	6		syp2het	herm	0
DLW195het	2022_02_04_DLW195het_555rad51_488gfpcosa1_dapi_herm6_stitched	173	57.5412	0.356261	3		syp2het	herm	0
DLW195het	2022_02_04_DLW195het_555rad51_488gfpcosa1_dapi_herm6_stitched	32	57.7966	0.357842	3		syp2het	herm	0
DLW195het	2022_02_04_DLW195het_555rad51_488gfpcosa1_dapi_herm6_stitched	4	59.1972	0.366514	6		syp2het	herm	0
DLW195het	2022_02_04_DLW195het_555rad51_488gfpcosa1_dapi_herm6_stitched	33	59.4323	0.367969	8		syp2het	herm	0
DLW195het	2022_02_04_DLW195het_555rad51_488gfpcosa1_dapi_herm6_stitched	174	60.4173	0.374068	3		syp2het	herm	0
DLW195het	2022_02_04_DLW195het_555rad51_488gfpcosa1_dapi_herm6_stitched	200	60.5367	0.374807	1		syp2het	herm	0
DLW195het	2022_02_04_DLW195het_555rad51_488gfpcosa1_dapi_herm6_stitched	176	61.2819	0.379421	7		syp2het	herm	0
DLW195het	2022_02_04_DLW195het_555rad51_488gfpcosa1_dapi_herm6_stitched	3	61.6827	0.381902	5		syp2het	herm	0
DLW195het	2022_02_04_DLW195het_555rad51_488gfpcosa1_dapi_herm6_stitched	31	62.0104	0.383932	11		syp2het	herm	0
DLW195het	2022_02_04_DLW195het_555rad51_488gfpcosa1_dapi_herm6_stitched	29	62.4551	0.386685	5		syp2het	herm	0
DLW195het	2022_02_04_DLW195het_555rad51_488gfpcosa1_dapi_herm6_stitched	177	63.6151	0.393867	4		syp2het	herm	0
DLW195het	2022_02_04_DLW195het_555rad51_488gfpcosa1_dapi_herm6_stitched	30	64.5748	0.399809	9		syp2het	herm	0
DLW195het	2022_02_04_DLW195het_555rad51_488gfpcosa1_dapi_herm6_stitched	34	65.1155	0.403156	6		syp2het	herm	0
DLW195het	2022_02_04_DLW195het_555rad51_488gfpcosa1_dapi_herm6_stitched	201	66.07	0.409066	2		syp2het	herm	0
DLW195het	2022_02_04_DLW195het_555rad51_488gfpcosa1_dapi_herm6_stitched	35	67.832	0.419975	2		syp2het	herm	0
DLW195het	2022_02_04_DLW195het_555rad51_488gfpcosa1_dapi_herm6_stitched	2	67.8791	0.420267	5		syp2het	herm	4
DLW195het	2022_02_04_DLW195het_555rad51_488gfpcosa1_dapi_herm6_stitched	36	68.6166	0.424833	3		syp2het	herm	0
DLW195het	2022_02_04_DLW195het_555rad51_488gfpcosa1_dapi_herm6_stitched	1	68.8972	0.42657	1		syp2het	herm	0
DLW195het	2022_02_04_DLW195het_555rad51_488gfpcosa1_dapi_herm6_stitched	37	70.5624	0.436881	4		syp2het	herm	1
DLW195het	2022_02_04_DLW195het_555rad51_488gfpcosa1_dapi_herm6_stitched	5	70.5972	0.437096	2		syp2het	herm	2
DLW195het	2022_02_04_DLW195het_555rad51_488gfpcosa1_dapi_herm6_stitched	40	71.8168	0.444647	3		syp2het	herm	0
DLW195het	2022_02_04_DLW195het_555rad51_488gfpcosa1_dapi_herm6_stitched	7	72.111	0.446468	3		syp2het	herm	0
DLW195het	2022_02_04_DLW195het_555rad51_488gfpcosa1_dapi_herm6_stitched	41	73.4526	0.454775	4		syp2het	herm	0
DLW195het	2022_02_04_DLW195het_555rad51_488gfpcosa1_dapi_herm6_stitched	42	73.7851	0.456834	3		syp2het	herm	0
DLW195het	2022_02_04_DLW195het_555rad51_488gfpcosa1_dapi_herm6_stitched	6	73.9117	0.457618	4		syp2het	herm	1
DLW195het	2022_02_04_DLW195het_555rad51_488gfpcosa1_dapi_herm6_stitched	39	74.462	0.461025	5		syp2het	herm	0
DLW195het	2022_02_04_DLW195het_555rad51_488gfpcosa1_dapi_herm6_stitched	42	74.6982	0.462487	3		syp2het	herm	0
DLW195het	2022_02_04_DLW195het_555rad51_488gfpcosa1_dapi_herm6_stitched	9	75.0075	0.464402	11		syp2het	herm	0
DLW195het	2022_02_04_DLW195het_555rad51_488gfpcosa1_dapi_herm6_stitched	46	76.2384	0.472023	3		syp2het	herm	2
DLW195het	2022_02_04_DLW195het_555rad51_488gfpcosa1_dapi_herm6_stitched	43	76.7345	0.475094	6		syp2het	herm	0
DLW195het	2022_02_04_DLW195het_555rad51_488gfpcosa1_dapi_herm6_stitched	8	76.9226	0.476259	6		syp2het	herm	1
DLW195het	2022_02_04_DLW195het_555rad51_488gfpcosa1_dapi_herm6_stitched	44	77.8277	0.481863	1		syp2het	herm	3
DLW195het	2022_02_04_DLW195het_555rad51_488gfpcosa1_dapi_herm6_stitched	10	78.6436	0.486915	2		syp2het	herm	2
DLW195het	2022_02_04_DLW195het_555rad51_488gfpcosa1_dapi_herm6_stitched	48	79.4707	0.492035	1		syp2het	herm	1
DLW195het	2022_02_04_DLW195het_555rad51_488gfpcosa1_dapi_herm6_stitched	50	80.1879	0.496476	4		syp2het	herm	1
DLW195het	2022_02_04_DLW195het_555rad51_488gfpcosa1_dapi_herm6_stitched	45	80.2247	0.496704	3		syp2het	herm	1
DLW195het	2022_02_04_DLW195het_555rad51_488gfpcosa1_dapi_herm6_stitched	48	81.9321	0.507275	1		syp2het	herm	1
DLW195het	2022_02_04_DLW195het_555rad51_488gfpcosa1_dapi_herm6_stitched	49	82.3776	0.510033	3		syp2het	herm	2
DLW195het	2022_02_04_DLW195het_555rad51_488gfpcosa1_dapi_herm6_stitched	51	84.8007	0.525036	5		syp2het	herm	3
DLW195het	2022_02_04_DLW195het_555rad51_488gfpcosa1_dapi_herm6_stitched	11	85.0774	0.526748	4		syp2het	herm	1
DLW195het	2022_02_04_DLW195het_555rad51_488gfpcosa1_dapi_herm6_stitched	12	85.3328	0.52833	4		syp2het	herm	3
DLW195het	2022_02_04_DLW195het_555rad51_488gfpcosa1_dapi_herm6_stitched	53	86.0123	0.532537	3		syp2het	herm	5
DLW195het	2022_02_04_DLW195het_555rad51_488gfpcosa1_dapi_herm6_stitched	55	87.4585	0.541491	3		syp2het	herm	5
DLW195het	2022_02_04_DLW195het_555rad51_488gfpcosa1_dapi_herm6_stitched	13	87.7931	0.543563	7		syp2het	herm	5
DLW195het	2022_02_04_DLW195het_555rad51_488gfpcosa1_dapi_herm6_stitched	14	88.6714	0.549	2		syp2het	herm	5
DLW195het	2022_02_04_DLW195het_555rad51_488gfpcosa1_dapi_herm6_stitched	52	89.324	0.553041	3		syp2het	herm	4
DLW195het	2022_02_04_DLW195het_555rad51_488gfpcosa1_dapi_herm6_stitched	54	89.9898	0.557164	3		syp2het	herm	5
DLW195het	2022_02_04_DLW195het_555rad51_488gfpcosa1_dapi_herm6_stitched	15	90.1054	0.557879	2		syp2het	herm	6
DLW195het	2022_02_04_DLW195het_555rad51_488gfpcosa1_dapi_herm6_stitched	58	91.1621	0.564421	3		syp2het	herm	6
DLW195het	2022_02_04_DLW195het_555rad51_488gfpcosa1_dapi_herm6_stitched	56	91.5561	0.566861	2		syp2het	herm	6
DLW195het	2022_02_04_DLW195het_555rad51_488gfpcosa1_dapi_herm6_stitched	57	93.5432	0.579164	1		syp2het	herm	5
DLW195het	2022_02_04_DLW195het_555rad51_488gfpcosa1_dapi_herm6_stitched	16	93.9201	0.581498	7		syp2het	herm	6
DLW195het	2022_02_04_DLW195het_555rad51_488gfpcosa1_dapi_herm6_stitched	59	95.5361	0.591503	6		syp2het	herm	5
DLW195het	2022_02_04_DLW195het_555rad51_488gfpcosa1_dapi_herm6_stitched	60	95.9224	0.593895	5		syp2het	herm	5
DLW195het	2022_02_04_DLW195het_555rad51_488gfpcosa1_dapi_herm6_stitched	17	96.5046	0.597499	2		syp2het	herm	6
DLW195het	2022_02_04_DLW195het_555rad51_488gfpcosa1_dapi_herm6_stitched	62	97.3319	0.602622	5		syp2het	herm	6
DLW195het	2022_02_04_DLW195het_555rad51_488gfpcosa1_dapi_herm6_stitched	61	98.0269	0.606924	1		syp2het	herm	6
DLW195het	2022_02_04_DLW195het_555rad51_488gfpcosa1_dapi_herm6_stitched	18	98.9301	0.612516	7		syp2het	herm	6
DLW195het	2022_02_04_DLW195het_555rad51_488gfpcosa1_dapi_herm6_stitched	63	99.7382	0.61752	3		syp2het	herm	6
DLW195het	2022_02_04_DLW195het_555rad51_488gfpcosa1_dapi_herm6_stitched	64	99.8904	0.618462	0		syp2het	herm	6
DLW195het	2022_02_04_DLW195het_555rad51_488gfpcosa1_dapi_herm6_stitched	65	102.187	0.632678	1		syp2het	herm	6
DLW195het	2022_02_04_DLW195het_555rad51_488gfpcosa1_dapi_herm6_stitched	19	103.652	0.641751	1		syp2het	herm	6
DLW195het	2022_02_04_DLW195het_555rad51_488gfpcosa1_dapi_herm6_stitched	66	103.846	0.642954	0		syp2het	herm	6
DLW195het	2022_02_04_DLW195het_555rad51_488gfpcosa1_dapi_herm6_stitched	69	103.906	0.643322	3		syp2het	herm	6
DLW195het	2022_02_04_DLW195het_555rad51_488gfpcosa1_dapi_herm6_stitched	20	104.526	0.647163	2		syp2het	herm	6
DLW195het	2022_02_04_DLW195het_555rad51_488gfpcosa1_dapi_herm6_stitched	67	104.56	0.647375	1		syp2het	herm	6
DLW195het	2022_02_04_DLW195het_555rad51_488gfpcosa1_dapi_herm6_stitched	68	105.599	0.653808	3		syp2het	herm	6
DLW195het	2022_02_04_DLW195het_555rad51_488gfpcosa1_dapi_herm6_stitched	70	108.675	0.672851	2		syp2het	herm	6
DLW195het	2022_02_04_DLW195het_555rad51_488gfpcosa1_dapi_herm6_stitched	74	108.945	0.674522	1		syp2het	herm	6
DLW195het	2022_02_04_DLW195het_555rad51_488gfpcosa1_dapi_herm6_stitched	73	109.606	0.678616	2		syp2het	herm	6
DLW195het	2022_02_04_DLW195het_555rad51_488gfpcosa1_dapi_herm6_stitched	21	109.703	0.679213	0		syp2het	herm	6
DLW195het	2022_02_04_DLW195het_555rad51_488gfpcosa1_dapi_herm6_stitched	71	110.1	0.681674	0		syp2het	herm	6
DLW195het	2022_02_04_DLW195het_555rad51_488gfpcosa1_dapi_herm6_stitched	72	111.113	0.687944	1		syp2het	herm	6
DLW195het	2022_02_04_DLW195het_555rad51_488gfpcosa1_dapi_herm6_stitched	24	113.804	0.704608	2		syp2het	herm	5
DLW195het	2022_02_04_DLW195het_555rad51_488gfpcosa1_dapi_herm6_stitched	75	114.2	0.707056	2		syp2het	herm	6
DLW195het	2022_02_04_DLW195het_555rad51_488gfpcosa1_dapi_herm6_stitched	22	115.38	0.714365	1		syp2het	herm	6
DLW195het	2022_02_04_DLW195het_555rad51_488gfpcosa1_dapi_herm6_stitched	82	115.413	0.714567	1		syp2het	herm	6
DLW195het	2022_02_04_DLW195het_555rad51_488gfpcosa1_dapi_herm6_stitched	78	115.595	0.715693	0		syp2het	herm	6
DLW195het	2022_02_04_DLW195het_555rad51_488gfpcosa1_dapi_herm6_stitched	77	115.634	0.715935	1		syp2het	herm	6
DLW195het	2022_02_04_DLW195het_555rad51_488gfpcosa1_dapi_herm6_stitched	25	115.671	0.716167	1		syp2het	herm	6
DLW195het	2022_02_04_DLW195het_555rad51_488gfpcosa1_dapi_herm6_stitched	23	117.73	0.728911	1		syp2het	herm	6
DLW195het	2022_02_04_DLW195het_555rad51_488gfpcosa1_dapi_herm6_stitched	76	118.058	0.730947	15		syp2het	herm	0
DLW195het	2022_02_04_DLW195het_555rad51_488gfpcosa1_dapi_herm6_stitched	79	118.158	0.731567	18		syp2het	herm	0
DLW195het	2022_02_04_DLW195het_555rad51_488gfpcosa1_dapi_herm6_stitched	84	118.611	0.734366	2		syp2het	herm	5
DLW195het	2022_02_04_DLW195het_555rad51_488gfpcosa1_dapi_herm6_stitched	81	120.204	0.744233	0		syp2het	herm	6
DLW195het	2022_02_04_DLW195het_555rad51_488gfpcosa1_dapi_herm6_stitched	26	121.869	0.754538	3		syp2het	herm	6
DLW195het	2022_02_04_DLW195het_555rad51_488gfpcosa1_dapi_herm6_stitched	85	121.989	0.755284	3		syp2het	herm	6
DLW195het	2022_02_04_DLW195het_555rad51_488gfpcosa1_dapi_herm6_stitched	83	122.043	0.755617	0		syp2het	herm	6
DLW195het	2022_02_04_DLW195het_555rad51_488gfpcosa1_dapi_herm6_stitched	94	122.46	0.758197	1		syp2het	herm	6
DLW195het	2022_02_04_DLW195het_555rad51_488gfpcosa1_dapi_herm6_stitched	94	123.934	0.767328	1		syp2het	herm	6
DLW195het	2022_02_04_DLW195het_555rad51_488gfpcosa1_dapi_herm6_stitched	86	124.599	0.771442	1		syp2het	herm	6
DLW195het	2022_02_04_DLW195het_555rad51_488gfpcosa1_dapi_herm6_stitched	28	125.135	0.77476	1		syp2het	herm	6
DLW195het	2022_02_04_DLW195het_555rad51_488gfpcosa1_dapi_herm6_stitched	87	125.582	0.777527	2		syp2het	herm	6
DLW195het	2022_02_04_DLW195het_555rad51_488gfpcosa1_dapi_herm6_stitched	115	127.468	0.789206	0		syp2het	herm	6
DLW195het	2022_02_04_DLW195het_555rad51_488gfpcosa1_dapi_herm6_stitched	92	128.361	0.794732	0		syp2het	herm	6
DLW195het	2022_02_04_DLW195het_555rad51_488gfpcosa1_dapi_herm6_stitched	27	128.969	0.798501	2		syp2het	herm	4
DLW195het	2022_02_04_DLW195het_555rad51_488gfpcosa1_dapi_herm6_stitched	116	129.278	0.800413	0		syp2het	herm	6
DLW195het	2022_02_04_DLW195het_555rad51_488gfpcosa1_dapi_herm6_stitched	113	131.537	0.814401	1		syp2het	herm	6
DLW195het	2022_02_04_DLW195het_555rad51_488gfpcosa1_dapi_herm6_stitched	88	132.07	0.817696	4		syp2het	herm	6
DLW195het	2022_02_04_DLW195het_555rad51_488gfpcosa1_dapi_herm6_stitched	91	135.291	0.837639	1		syp2het	herm	6
DLW195het	2022_02_04_DLW195het_555rad51_488gfpcosa1_dapi_herm6_stitched	93	137.065	0.848625	0		syp2het	herm	6
DLW195het	2022_02_04_DLW195het_555rad51_488gfpcosa1_dapi_herm6_stitched	114	138.366	0.856681	0		syp2het	herm	6
DLW195het	2022_02_04_DLW195het_555rad51_488gfpcosa1_dapi_herm6_stitched	110	138.776	0.859221	2		syp2het	herm	6
DLW195het	2022_02_04_DLW195het_555rad51_488gfpcosa1_dapi_herm6_stitched	97	139.913	0.866258	2		syp2het	herm	6
DLW195het	2022_02_04_DLW195het_555rad51_488gfpcosa1_dapi_herm6_stitched	102	139.924	0.866328	0		syp2het	herm	6
DLW195het	2022_02_04_DLW195het_555rad51_488gfpcosa1_dapi_herm6_stitched	95	141.112	0.873684	0		syp2het	herm	6
DLW195het	2022_02_04_DLW195het_555rad51_488gfpcosa1_dapi_herm6_stitched	112	141.413	0.875548	0		syp2het	herm	6
DLW195het	2022_02_04_DLW195het_555rad51_488gfpcosa1_dapi_herm6_stitched	90	141.978	0.879043	2		syp2het	herm	6
DLW195het	2022_02_04_DLW195het_555rad51_488gfpcosa1_dapi_herm6_stitched	117	142.258	0.880774	2		syp2het	herm	6
DLW195het	2022_02_04_DLW195het_555rad51_488gfpcosa1_dapi_herm6_stitched	98	143.033	0.885574	1		syp2het	herm	6
DLW195het	2022_02_04_DLW195het_555rad51_488gfpcosa1_dapi_herm6_stitched	100	147.006	0.910174	2		syp2het	herm	6
DLW195het	2022_02_04_DLW195het_555rad51_488gfpcosa1_dapi_herm6_stitched	105	148.171	0.917387	0		syp2het	herm	6
DLW195het	2022_02_04_DLW195het_555rad51_488gfpcosa1_dapi_herm6_stitched	111	148.777	0.921138	0		syp2het	herm	6
DLW195het	2022_02_04_DLW195het_555rad51_488gfpcosa1_dapi_herm6_stitched	119	150.286	0.93048	1		syp2het	herm	6
DLW195het	2022_02_04_DLW195het_555rad51_488gfpcosa1_dapi_herm6_stitched	96	151.954	0.940811	1		syp2het	herm	6
DLW195het	2022_02_04_DLW195het_555rad51_488gfpcosa1_dapi_herm6_stitched	118	153.377	0.94962	1		syp2het	herm	6
DLW195het	2022_02_04_DLW195het_555rad51_488gfpcosa1_dapi_herm6_stitched	103	153.49	0.950319	0		syp2het	herm	6
DLW195het	2022_02_04_DLW195het_555rad51_488gfpcosa1_dapi_herm6_stitched	106	154.239	0.954958	1		syp2het	herm	6
DLW195het	2022_02_04_DLW195het_555rad51_488gfpcosa1_dapi_herm6_stitched	99	156.281	0.967598	0		syp2het	herm	6
DLW195het	2022_02_04_DLW195het_555rad51_488gfpcosa1_dapi_herm6_stitched	121	158.018	0.978354	0		syp2het	herm	6
DLW195het	2022_02_04_DLW195het_555rad51_488gfpcosa1_dapi_herm6_stitched	107	158.098	0.978848	0		syp2het	herm	6
DLW195het	2022_02_04_DLW195het_555rad51_488gfpcosa1_dapi_herm6_stitched	104	159.882	0.989892	0		syp2het	herm	6
DLW195het	2022_02_04_DLW195het_555rad51_488gfpcosa1_dapi_herm6_stitched	109	161.326	0.998838	0		syp2het	herm	6
DLW195het	2022_02_04_DLW195het_555rad51_488gfpcosa1_dapi_herm6_stitched	101	161.514	1	0		syp2het	herm	6
DLW195het	2022_02_04_DLW195het_555rad51_488gfpcosa1_dapi_herm6_stitched	120	161.514	1	0		syp2het	herm	6
DLW195het	2022_02_04_DLW195het_555rad51_488gfpcosa1_dapi_herm6_stitched	122	161.514	1	0		syp2het	herm	6
DLW195het	2022_02_04_DLW195het_555rad51_488gfpcosa1_dapi_herm6_stitched	108	161.514	1	0		syp2het	herm	6
DLW195het	2022_02_04_DLW195het_555rad51_488gfpcosa1_dapi_herm8_stitched	65	2.00306	0.0124483	4		syp2het	herm	0
DLW195het	2022_02_04_DLW195het_555rad51_488gfpcosa1_dapi_herm8_stitched	72	2.23769	0.0139064	3		syp2het	herm	1
DLW195het	2022_02_04_DLW195het_555rad51_488gfpcosa1_dapi_herm8_stitched	70	3.50289	0.0217692	6		syp2het	herm	0
DLW195het	2022_02_04_DLW195het_555rad51_488gfpcosa1_dapi_herm8_stitched	110	6.11384	0.0379953	7		syp2het	herm	0
DLW195het	2022_02_04_DLW195het_555rad51_488gfpcosa1_dapi_herm8_stitched	64	6.2568	0.0388837	14		syp2het	herm	0
DLW195het	2022_02_04_DLW195het_555rad51_488gfpcosa1_dapi_herm8_stitched	73	6.46132	0.0401548	11		syp2het	herm	0
DLW195het	2022_02_04_DLW195het_555rad51_488gfpcosa1_dapi_herm8_stitched	57	8.97953	0.0558045	8		syp2het	herm	0
DLW195het	2022_02_04_DLW195het_555rad51_488gfpcosa1_dapi_herm8_stitched	109	9.45734	0.0587739	10		syp2het	herm	0
DLW195het	2022_02_04_DLW195het_555rad51_488gfpcosa1_dapi_herm8_stitched	105	9.58612	0.0595742	3		syp2het	herm	0
DLW195het	2022_02_04_DLW195het_555rad51_488gfpcosa1_dapi_herm8_stitched	66	10.3406	0.0642629	7		syp2het	herm	0
DLW195het	2022_02_04_DLW195het_555rad51_488gfpcosa1_dapi_herm8_stitched	69	12.6965	0.0789043	3		syp2het	herm	0
DLW195het	2022_02_04_DLW195het_555rad51_488gfpcosa1_dapi_herm8_stitched	101	13.3846	0.0831803	10		syp2het	herm	0
DLW195het	2022_02_04_DLW195het_555rad51_488gfpcosa1_dapi_herm8_stitched	106	13.6107	0.0845857	8		syp2het	herm	0
DLW195het	2022_02_04_DLW195het_555rad51_488gfpcosa1_dapi_herm8_stitched	59	13.6686	0.0849452	11		syp2het	herm	0
DLW195het	2022_02_04_DLW195het_555rad51_488gfpcosa1_dapi_herm8_stitched	68	13.7596	0.0855112	3		syp2het	herm	0
DLW195het	2022_02_04_DLW195het_555rad51_488gfpcosa1_dapi_herm8_stitched	71	14.6207	0.0908621	5		syp2het	herm	0
DLW195het	2022_02_04_DLW195het_555rad51_488gfpcosa1_dapi_herm8_stitched	103	16.4031	0.101939	4		syp2het	herm	0
DLW195het	2022_02_04_DLW195het_555rad51_488gfpcosa1_dapi_herm8_stitched	63	16.5451	0.102822	6		syp2het	herm	0
DLW195het	2022_02_04_DLW195het_555rad51_488gfpcosa1_dapi_herm8_stitched	108	18.5695	0.115403	5		syp2het	herm	0
DLW195het	2022_02_04_DLW195het_555rad51_488gfpcosa1_dapi_herm8_stitched	104	21.7043	0.134884	5		syp2het	herm	0
DLW195het	2022_02_04_DLW195het_555rad51_488gfpcosa1_dapi_herm8_stitched	54	23.5139	0.14613	6		syp2het	herm	1
DLW195het	2022_02_04_DLW195het_555rad51_488gfpcosa1_dapi_herm8_stitched	99	24.3753	0.151484	5		syp2het	herm	0
DLW195het	2022_02_04_DLW195het_555rad51_488gfpcosa1_dapi_herm8_stitched	61	25.1585	0.156351	8		syp2het	herm	0
DLW195het	2022_02_04_DLW195het_555rad51_488gfpcosa1_dapi_herm8_stitched	100	27.5464	0.171191	8		syp2het	herm	0
DLW195het	2022_02_04_DLW195het_555rad51_488gfpcosa1_dapi_herm8_stitched	47	28.7594	0.178729	5		syp2het	herm	0
DLW195het	2022_02_04_DLW195het_555rad51_488gfpcosa1_dapi_herm8_stitched	48	29.8158	0.185294	8		syp2het	herm	0
DLW195het	2022_02_04_DLW195het_555rad51_488gfpcosa1_dapi_herm8_stitched	56	33.5411	0.208446	4		syp2het	herm	0
DLW195het	2022_02_04_DLW195het_555rad51_488gfpcosa1_dapi_herm8_stitched	60	35.1863	0.21867	2		syp2het	herm	1
DLW195het	2022_02_04_DLW195het_555rad51_488gfpcosa1_dapi_herm8_stitched	107	35.3112	0.219446	5		syp2het	herm	0
DLW195het	2022_02_04_DLW195het_555rad51_488gfpcosa1_dapi_herm8_stitched	55	38.9878	0.242295	3		syp2het	herm	1
DLW195het	2022_02_04_DLW195het_555rad51_488gfpcosa1_dapi_herm8_stitched	98	39.9859	0.248498	2		syp2het	herm	0
DLW195het	2022_02_04_DLW195het_555rad51_488gfpcosa1_dapi_herm8_stitched	102	41.1022	0.255435	6		syp2het	herm	1
DLW195het	2022_02_04_DLW195het_555rad51_488gfpcosa1_dapi_herm8_stitched	45	42.8311	0.26618	4		syp2het	herm	2
DLW195het	2022_02_04_DLW195het_555rad51_488gfpcosa1_dapi_herm8_stitched	97	45.3641	0.281921	4		syp2het	herm	0
DLW195het	2022_02_04_DLW195het_555rad51_488gfpcosa1_dapi_herm8_stitched	27	48.5662	0.301821	8		syp2het	herm	0
DLW195het	2022_02_04_DLW195het_555rad51_488gfpcosa1_dapi_herm8_stitched	89	51.0256	0.317105	6		syp2het	herm	0
DLW195het	2022_02_04_DLW195het_555rad51_488gfpcosa1_dapi_herm8_stitched	52	51.6521	0.320999	3		syp2het	herm	3
DLW195het	2022_02_04_DLW195het_555rad51_488gfpcosa1_dapi_herm8_stitched	26	54.1255	0.33637	3		syp2het	herm	2
DLW195het	2022_02_04_DLW195het_555rad51_488gfpcosa1_dapi_herm8_stitched	87	54.1872	0.336754	3		syp2het	herm	1
DLW195het	2022_02_04_DLW195het_555rad51_488gfpcosa1_dapi_herm8_stitched	2	54.5296	0.338882	3		syp2het	herm	2
DLW195het	2022_02_04_DLW195het_555rad51_488gfpcosa1_dapi_herm8_stitched	50	57.6809	0.358466	4		syp2het	herm	1
DLW195het	2022_02_04_DLW195het_555rad51_488gfpcosa1_dapi_herm8_stitched	94	58.1361	0.361295	5		syp2het	herm	5
DLW195het	2022_02_04_DLW195het_555rad51_488gfpcosa1_dapi_herm8_stitched	75	59.5627	0.370161	9		syp2het	herm	1
DLW195het	2022_02_04_DLW195het_555rad51_488gfpcosa1_dapi_herm8_stitched	29	60.1513	0.373818	3		syp2het	herm	4
DLW195het	2022_02_04_DLW195het_555rad51_488gfpcosa1_dapi_herm8_stitched	44	61.2031	0.380355	4		syp2het	herm	6
DLW195het	2022_02_04_DLW195het_555rad51_488gfpcosa1_dapi_herm8_stitched	86	61.9819	0.385195	2		syp2het	herm	4
DLW195het	2022_02_04_DLW195het_555rad51_488gfpcosa1_dapi_herm8_stitched	1	62.3175	0.387281	0		syp2het	herm	4
DLW195het	2022_02_04_DLW195het_555rad51_488gfpcosa1_dapi_herm8_stitched	34	65.5535	0.407391	9		syp2het	herm	3
DLW195het	2022_02_04_DLW195het_555rad51_488gfpcosa1_dapi_herm8_stitched	92	66.9601	0.416132	2		syp2het	herm	3
DLW195het	2022_02_04_DLW195het_555rad51_488gfpcosa1_dapi_herm8_stitched	96	67.7734	0.421187	4		syp2het	herm	4
DLW195het	2022_02_04_DLW195het_555rad51_488gfpcosa1_dapi_herm8_stitched	14	67.8139	0.421439	10		syp2het	herm	5
DLW195het	2022_02_04_DLW195het_555rad51_488gfpcosa1_dapi_herm8_stitched	74	69.1906	0.429994	2		syp2het	herm	3
DLW195het	2022_02_04_DLW195het_555rad51_488gfpcosa1_dapi_herm8_stitched	41	69.2176	0.430162	0		syp2het	herm	6
DLW195het	2022_02_04_DLW195het_555rad51_488gfpcosa1_dapi_herm8_stitched	9	71.2673	0.4429	9		syp2het	herm	1
DLW195het	2022_02_04_DLW195het_555rad51_488gfpcosa1_dapi_herm8_stitched	24	72.1033	0.448095	3		syp2het	herm	6
DLW195het	2022_02_04_DLW195het_555rad51_488gfpcosa1_dapi_herm8_stitched	93	73.7945	0.458606	10		syp2het	herm	4
DLW195het	2022_02_04_DLW195het_555rad51_488gfpcosa1_dapi_herm8_stitched	3	76.0504	0.472626	9		syp2het	herm	5
DLW195het	2022_02_04_DLW195het_555rad51_488gfpcosa1_dapi_herm8_stitched	78	77.9044	0.484148	2		syp2het	herm	6
DLW195het	2022_02_04_DLW195het_555rad51_488gfpcosa1_dapi_herm8_stitched	11	78.3369	0.486835	5		syp2het	herm	6
DLW195het	2022_02_04_DLW195het_555rad51_488gfpcosa1_dapi_herm8_stitched	32	79.4333	0.493649	4		syp2het	herm	6
DLW195het	2022_02_04_DLW195het_555rad51_488gfpcosa1_dapi_herm8_stitched	85	80.6289	0.501079	9		syp2het	herm	6
DLW195het	2022_02_04_DLW195het_555rad51_488gfpcosa1_dapi_herm8_stitched	19	80.8121	0.502218	2		syp2het	herm	6
DLW195het	2022_02_04_DLW195het_555rad51_488gfpcosa1_dapi_herm8_stitched	8	82.6559	0.513676	6		syp2het	herm	6
DLW195het	2022_02_04_DLW195het_555rad51_488gfpcosa1_dapi_herm8_stitched	95	83.3115	0.517751	2		syp2het	herm	6
DLW195het	2022_02_04_DLW195het_555rad51_488gfpcosa1_dapi_herm8_stitched	31	85.9549	0.534179	3		syp2het	herm	6
DLW195het	2022_02_04_DLW195het_555rad51_488gfpcosa1_dapi_herm8_stitched	16	86.8683	0.539855	4		syp2het	herm	6
DLW195het	2022_02_04_DLW195het_555rad51_488gfpcosa1_dapi_herm8_stitched	12	89.7201	0.557578	3		syp2het	herm	6
DLW195het	2022_02_04_DLW195het_555rad51_488gfpcosa1_dapi_herm8_stitched	81	90.2057	0.560595	4		syp2het	herm	6
DLW195het	2022_02_04_DLW195het_555rad51_488gfpcosa1_dapi_herm8_stitched	23	90.9275	0.565082	1		syp2het	herm	6
DLW195het	2022_02_04_DLW195het_555rad51_488gfpcosa1_dapi_herm8_stitched	76	91.1685	0.566579	2		syp2het	herm	6
DLW195het	2022_02_04_DLW195het_555rad51_488gfpcosa1_dapi_herm8_stitched	5	93.2357	0.579426	2		syp2het	herm	6
DLW195het	2022_02_04_DLW195het_555rad51_488gfpcosa1_dapi_herm8_stitched	91	94.1404	0.585048	0		syp2het	herm	6
DLW195het	2022_02_04_DLW195het_555rad51_488gfpcosa1_dapi_herm8_stitched	79	96.7481	0.601254	2		syp2het	herm	6
DLW195het	2022_02_04_DLW195het_555rad51_488gfpcosa1_dapi_herm8_stitched	20	96.87	0.602012	3		syp2het	herm	6
DLW195het	2022_02_04_DLW195het_555rad51_488gfpcosa1_dapi_herm8_stitched	35	97.4057	0.605341	2		syp2het	herm	6
DLW195het	2022_02_04_DLW195het_555rad51_488gfpcosa1_dapi_herm8_stitched	84	97.6415	0.606806	2		syp2het	herm	6
DLW195het	2022_02_04_DLW195het_555rad51_488gfpcosa1_dapi_herm8_stitched	13	98.633	0.612968	4		syp2het	herm	6
DLW195het	2022_02_04_DLW195het_555rad51_488gfpcosa1_dapi_herm8_stitched	25	101.778	0.632512	6		syp2het	herm	6
DLW195het	2022_02_04_DLW195het_555rad51_488gfpcosa1_dapi_herm8_stitched	4	102.173	0.63497	4		syp2het	herm	7
DLW195het	2022_02_04_DLW195het_555rad51_488gfpcosa1_dapi_herm8_stitched	77	102.62	0.637743	5		syp2het	herm	6
DLW195het	2022_02_04_DLW195het_555rad51_488gfpcosa1_dapi_herm8_stitched	88	103.933	0.645903	1		syp2het	herm	6
DLW195het	2022_02_04_DLW195het_555rad51_488gfpcosa1_dapi_herm8_stitched	21	106.52	0.661983	3		syp2het	herm	6
DLW195het	2022_02_04_DLW195het_555rad51_488gfpcosa1_dapi_herm8_stitched	33	106.709	0.663155	2		syp2het	herm	6
DLW195het	2022_02_04_DLW195het_555rad51_488gfpcosa1_dapi_herm8_stitched	80	108.318	0.673155	4		syp2het	herm	6
DLW195het	2022_02_04_DLW195het_555rad51_488gfpcosa1_dapi_herm8_stitched	7	110.253	0.68518	0		syp2het	herm	6
DLW195het	2022_02_04_DLW195het_555rad51_488gfpcosa1_dapi_herm8_stitched	90	111.058	0.690184	3		syp2het	herm	5
DLW195het	2022_02_04_DLW195het_555rad51_488gfpcosa1_dapi_herm8_stitched	30	114.057	0.70882	1		syp2het	herm	6
DLW195het	2022_02_04_DLW195het_555rad51_488gfpcosa1_dapi_herm8_stitched	82	114.496	0.711554	2		syp2het	herm	6
DLW195het	2022_02_04_DLW195het_555rad51_488gfpcosa1_dapi_herm8_stitched	17	115.137	0.715532	3		syp2het	herm	6
DLW195het	2022_02_04_DLW195het_555rad51_488gfpcosa1_dapi_herm8_stitched	10	117.498	0.730209	2		syp2het	herm	6
DLW195het	2022_02_04_DLW195het_555rad51_488gfpcosa1_dapi_herm8_stitched	37	119.108	0.740212	1		syp2het	herm	6
DLW195het	2022_02_04_DLW195het_555rad51_488gfpcosa1_dapi_herm8_stitched	28	120.034	0.745967	0		syp2het	herm	6
DLW195het	2022_02_04_DLW195het_555rad51_488gfpcosa1_dapi_herm8_stitched	15	122.055	0.758525	2		syp2het	herm	6
DLW195het	2022_02_04_DLW195het_555rad51_488gfpcosa1_dapi_herm8_stitched	83	122.527	0.76146	1		syp2het	herm	6
DLW195het	2022_02_04_DLW195het_555rad51_488gfpcosa1_dapi_herm8_stitched	38	124.746	0.775253	1		syp2het	herm	6
DLW195het	2022_02_04_DLW195het_555rad51_488gfpcosa1_dapi_herm8_stitched	6	126.541	0.786405	5		syp2het	herm	6
DLW195het	2022_02_04_DLW195het_555rad51_488gfpcosa1_dapi_herm8_stitched	18	132.458	0.823179	0		syp2het	herm	6
DLW195het	2022_02_04_DLW195het_555rad51_488gfpcosa1_dapi_herm8_stitched	39	135.665	0.843108	0		syp2het	herm	6
DLW195het	2022_02_04_DLW195het_555rad51_488gfpcosa1_dapi_herm8_stitched	36	137.142	0.852289	2		syp2het	herm	6
DLW195het	2022_02_04_DLW195het_555rad51_488gfpcosa1_dapi_herm8_stitched	22	140.269	0.87172	1		syp2het	herm	6
DLW195het	2022_02_04_DLW195het_555rad51_488gfpcosa1_dapi_herm8_stitched	46	142.686	0.886744	0		syp2het	herm	6
DLW195het	2022_02_04_DLW195het_555rad51_488gfpcosa1_dapi_herm8_stitched	43	146.359	0.909565	1		syp2het	herm	6
DLW195het	2022_02_04_DLW195het_555rad51_488gfpcosa1_dapi_herm8_stitched	53	147.392	0.915985	0		syp2het	herm	6
DLW195het	2022_02_04_DLW195het_555rad51_488gfpcosa1_dapi_herm8_stitched	42	151.424	0.941044	0		syp2het	herm	6
DLW195het	2022_02_04_DLW195het_555rad51_488gfpcosa1_dapi_herm8_stitched	51	152.073	0.945075	0		syp2het	herm	6
DLW195het	2022_02_04_DLW195het_555rad51_488gfpcosa1_dapi_herm8_stitched	62	152.113	0.945327	1		syp2het	herm	6
DLW195het	2022_02_04_DLW195het_555rad51_488gfpcosa1_dapi_herm8_stitched	67	157.193	0.976897	0		syp2het	herm	6
DLW195het	2022_02_04_DLW195het_555rad51_488gfpcosa1_dapi_herm8_stitched	58	158.261	0.983534	0		syp2het	herm	6
DLW195het	2022_02_04_DLW195het_555rad51_488gfpcosa1_dapi_herm8_stitched	49	158.586	0.985555	0		syp2het	herm	6
DLW195het	2022_02_04_DLW195het_555rad51_488gfpcosa1_dapi_herm8_stitched	40	160.452	0.997153	0		syp2het	herm	6
DLW196het	2022_02_04_DLW196het_555rad51_488gfpcosa1_dapi_herm1_stitched	123	1.64863	0.0087522	7		syp3het	herm	0
DLW196het	2022_02_04_DLW196het_555rad51_488gfpcosa1_dapi_herm1_stitched	124	4.09665	0.0217482	8		syp3het	herm	0
DLW196het	2022_02_04_DLW196het_555rad51_488gfpcosa1_dapi_herm1_stitched	88	4.45289	0.0236394	8		syp3het	herm	0
DLW196het	2022_02_04_DLW196het_555rad51_488gfpcosa1_dapi_herm1_stitched	87	9.28687	0.0493018	5		syp3het	herm	0
DLW196het	2022_02_04_DLW196het_555rad51_488gfpcosa1_dapi_herm1_stitched	120	13.5747	0.0720651	9		syp3het	herm	0
DLW196het	2022_02_04_DLW196het_555rad51_488gfpcosa1_dapi_herm1_stitched	122	16.0221	0.0850576	5		syp3het	herm	0
DLW196het	2022_02_04_DLW196het_555rad51_488gfpcosa1_dapi_herm1_stitched	121	19.7553	0.104876	3		syp3het	herm	0
DLW196het	2022_02_04_DLW196het_555rad51_488gfpcosa1_dapi_herm1_stitched	117	20.3667	0.108122	6		syp3het	herm	0
DLW196het	2022_02_04_DLW196het_555rad51_488gfpcosa1_dapi_herm1_stitched	80	20.5917	0.109317	6		syp3het	herm	0
DLW196het	2022_02_04_DLW196het_555rad51_488gfpcosa1_dapi_herm1_stitched	86	20.6771	0.10977	1		syp3het	herm	0
DLW196het	2022_02_04_DLW196het_555rad51_488gfpcosa1_dapi_herm1_stitched	118	20.8106	0.110479	8		syp3het	herm	0
DLW196het	2022_02_04_DLW196het_555rad51_488gfpcosa1_dapi_herm1_stitched	112	22.6863	0.120436	7		syp3het	herm	0
DLW196het	2022_02_04_DLW196het_555rad51_488gfpcosa1_dapi_herm1_stitched	82	23.4778	0.124638	1		syp3het	herm	0
DLW196het	2022_02_04_DLW196het_555rad51_488gfpcosa1_dapi_herm1_stitched	77	25.7879	0.136902	6		syp3het	herm	0
DLW196het	2022_02_04_DLW196het_555rad51_488gfpcosa1_dapi_herm1_stitched	119	26.0713	0.138407	2		syp3het	herm	0
DLW196het	2022_02_04_DLW196het_555rad51_488gfpcosa1_dapi_herm1_stitched	113	26.1133	0.138629	3		syp3het	herm	0
DLW196het	2022_02_04_DLW196het_555rad51_488gfpcosa1_dapi_herm1_stitched	84	26.5854	0.141136	3		syp3het	herm	0
DLW196het	2022_02_04_DLW196het_555rad51_488gfpcosa1_dapi_herm1_stitched	114	29.3136	0.155619	9		syp3het	herm	0
DLW196het	2022_02_04_DLW196het_555rad51_488gfpcosa1_dapi_herm1_stitched	79	29.5382	0.156811	1		syp3het	herm	0
DLW196het	2022_02_04_DLW196het_555rad51_488gfpcosa1_dapi_herm1_stitched	85	30.2382	0.160528	2		syp3het	herm	0
DLW196het	2022_02_04_DLW196het_555rad51_488gfpcosa1_dapi_herm1_stitched	74	31.3526	0.166444	4		syp3het	herm	0
DLW196het	2022_02_04_DLW196het_555rad51_488gfpcosa1_dapi_herm1_stitched	108	31.9618	0.169678	8		syp3het	herm	0
DLW196het	2022_02_04_DLW196het_555rad51_488gfpcosa1_dapi_herm1_stitched	81	32.0637	0.170219	5		syp3het	herm	0
DLW196het	2022_02_04_DLW196het_555rad51_488gfpcosa1_dapi_herm1_stitched	116	34.6933	0.184178	9		syp3het	herm	0
DLW196het	2022_02_04_DLW196het_555rad51_488gfpcosa1_dapi_herm1_stitched	109	35.0674	0.186165	1		syp3het	herm	0
DLW196het	2022_02_04_DLW196het_555rad51_488gfpcosa1_dapi_herm1_stitched	83	35.1836	0.186782	2		syp3het	herm	0
DLW196het	2022_02_04_DLW196het_555rad51_488gfpcosa1_dapi_herm1_stitched	76	35.4738	0.188322	1		syp3het	herm	1
DLW196het	2022_02_04_DLW196het_555rad51_488gfpcosa1_dapi_herm1_stitched	72	37.2043	0.197509	8		syp3het	herm	0
DLW196het	2022_02_04_DLW196het_555rad51_488gfpcosa1_dapi_herm1_stitched	78	37.3556	0.198312	3		syp3het	herm	1
DLW196het	2022_02_04_DLW196het_555rad51_488gfpcosa1_dapi_herm1_stitched	105	38.1002	0.202265	3		syp3het	herm	0
DLW196het	2022_02_04_DLW196het_555rad51_488gfpcosa1_dapi_herm1_stitched	110	39.1293	0.207728	2		syp3het	herm	0
DLW196het	2022_02_04_DLW196het_555rad51_488gfpcosa1_dapi_herm1_stitched	115	39.1983	0.208095	4		syp3het	herm	0
DLW196het	2022_02_04_DLW196het_555rad51_488gfpcosa1_dapi_herm1_stitched	106	41.3187	0.219351	2		syp3het	herm	0
DLW196het	2022_02_04_DLW196het_555rad51_488gfpcosa1_dapi_herm1_stitched	73	41.3831	0.219693	2		syp3het	herm	0
DLW196het	2022_02_04_DLW196het_555rad51_488gfpcosa1_dapi_herm1_stitched	68	43.5274	0.231077	9		syp3het	herm	0
DLW196het	2022_02_04_DLW196het_555rad51_488gfpcosa1_dapi_herm1_stitched	107	45.4664	0.241371	2		syp3het	herm	0
DLW196het	2022_02_04_DLW196het_555rad51_488gfpcosa1_dapi_herm1_stitched	102	45.8572	0.243445	6		syp3het	herm	0
DLW196het	2022_02_04_DLW196het_555rad51_488gfpcosa1_dapi_herm1_stitched	71	47.0242	0.24964	8		syp3het	herm	0
DLW196het	2022_02_04_DLW196het_555rad51_488gfpcosa1_dapi_herm1_stitched	64	47.1681	0.250404	12		syp3het	herm	0
DLW196het	2022_02_04_DLW196het_555rad51_488gfpcosa1_dapi_herm1_stitched	111	50.1306	0.266132	9		syp3het	herm	0
DLW196het	2022_02_04_DLW196het_555rad51_488gfpcosa1_dapi_herm1_stitched	98	51.638	0.274134	1		syp3het	herm	1
DLW196het	2022_02_04_DLW196het_555rad51_488gfpcosa1_dapi_herm1_stitched	104	52.8393	0.280512	4		syp3het	herm	0
DLW196het	2022_02_04_DLW196het_555rad51_488gfpcosa1_dapi_herm1_stitched	75	56.095	0.297795	5		syp3het	herm	0
DLW196het	2022_02_04_DLW196het_555rad51_488gfpcosa1_dapi_herm1_stitched	96	57.168	0.303492	3		syp3het	herm	0
DLW196het	2022_02_04_DLW196het_555rad51_488gfpcosa1_dapi_herm1_stitched	67	58.2502	0.309237	6		syp3het	herm	0
DLW196het	2022_02_04_DLW196het_555rad51_488gfpcosa1_dapi_herm1_stitched	69	60.552	0.321456	8		syp3het	herm	0
DLW196het	2022_02_04_DLW196het_555rad51_488gfpcosa1_dapi_herm1_stitched	63	60.6056	0.321741	2		syp3het	herm	0
DLW196het	2022_02_04_DLW196het_555rad51_488gfpcosa1_dapi_herm1_stitched	97	60.7367	0.322437	5		syp3het	herm	0
DLW196het	2022_02_04_DLW196het_555rad51_488gfpcosa1_dapi_herm1_stitched	58	61.5134	0.32656	8		syp3het	herm	0
DLW196het	2022_02_04_DLW196het_555rad51_488gfpcosa1_dapi_herm1_stitched	93	62.1869	0.330136	7		syp3het	herm	0
DLW196het	2022_02_04_DLW196het_555rad51_488gfpcosa1_dapi_herm1_stitched	65	63.5658	0.337456	8		syp3het	herm	0
DLW196het	2022_02_04_DLW196het_555rad51_488gfpcosa1_dapi_herm1_stitched	99	63.9357	0.339419	1		syp3het	herm	1
DLW196het	2022_02_04_DLW196het_555rad51_488gfpcosa1_dapi_herm1_stitched	101	64.9821	0.344975	0		syp3het	herm	0
DLW196het	2022_02_04_DLW196het_555rad51_488gfpcosa1_dapi_herm1_stitched	66	65.773	0.349173	2		syp3het	herm	0
DLW196het	2022_02_04_DLW196het_555rad51_488gfpcosa1_dapi_herm1_stitched	70	67.4362	0.358003	4		syp3het	herm	0
DLW196het	2022_02_04_DLW196het_555rad51_488gfpcosa1_dapi_herm1_stitched	94	67.6	0.358873	5		syp3het	herm	0
DLW196het	2022_02_04_DLW196het_555rad51_488gfpcosa1_dapi_herm1_stitched	92	68.291	0.362541	6		syp3het	herm	0
DLW196het	2022_02_04_DLW196het_555rad51_488gfpcosa1_dapi_herm1_stitched	103	70.31	0.373259	3		syp3het	herm	4
DLW196het	2022_02_04_DLW196het_555rad51_488gfpcosa1_dapi_herm1_stitched	100	70.5387	0.374473	4		syp3het	herm	0
DLW196het	2022_02_04_DLW196het_555rad51_488gfpcosa1_dapi_herm1_stitched	95	76.5363	0.406313	4		syp3het	herm	0
DLW196het	2022_02_04_DLW196het_555rad51_488gfpcosa1_dapi_herm1_stitched	61	76.5882	0.406589	4		syp3het	herm	2
DLW196het	2022_02_04_DLW196het_555rad51_488gfpcosa1_dapi_herm1_stitched	91	79.6783	0.422994	5		syp3het	herm	2
DLW196het	2022_02_04_DLW196het_555rad51_488gfpcosa1_dapi_herm1_stitched	60	82.6994	0.439032	5		syp3het	herm	2
DLW196het	2022_02_04_DLW196het_555rad51_488gfpcosa1_dapi_herm1_stitched	62	84.5908	0.449073	3		syp3het	herm	4
DLW196het	2022_02_04_DLW196het_555rad51_488gfpcosa1_dapi_herm1_stitched	56	87.0513	0.462135	3		syp3het	herm	5
DLW196het	2022_02_04_DLW196het_555rad51_488gfpcosa1_dapi_herm1_stitched	89	87.4927	0.464478	2		syp3het	herm	4
DLW196het	2022_02_04_DLW196het_555rad51_488gfpcosa1_dapi_herm1_stitched	57	88.9218	0.472065	0		syp3het	herm	5
DLW196het	2022_02_04_DLW196het_555rad51_488gfpcosa1_dapi_herm1_stitched	90	89.6075	0.475705	0		syp3het	herm	6
DLW196het	2022_02_04_DLW196het_555rad51_488gfpcosa1_dapi_herm1_stitched	59	91.4919	0.485709	2		syp3het	herm	6
DLW196het	2022_02_04_DLW196het_555rad51_488gfpcosa1_dapi_herm1_stitched	45	98.2271	0.521465	1		syp3het	herm	6
DLW196het	2022_02_04_DLW196het_555rad51_488gfpcosa1_dapi_herm1_stitched	50	99.4883	0.52816	6		syp3het	herm	0
DLW196het	2022_02_04_DLW196het_555rad51_488gfpcosa1_dapi_herm1_stitched	42	101.772	0.540285	1		syp3het	herm	6
DLW196het	2022_02_04_DLW196het_555rad51_488gfpcosa1_dapi_herm1_stitched	54	102.094	0.541994	6		syp3het	herm	5
DLW196het	2022_02_04_DLW196het_555rad51_488gfpcosa1_dapi_herm1_stitched	49	102.709	0.54526	2		syp3het	herm	6
DLW196het	2022_02_04_DLW196het_555rad51_488gfpcosa1_dapi_herm1_stitched	44	104.445	0.554473	3		syp3het	herm	6
DLW196het	2022_02_04_DLW196het_555rad51_488gfpcosa1_dapi_herm1_stitched	53	105.013	0.557487	0		syp3het	herm	6
DLW196het	2022_02_04_DLW196het_555rad51_488gfpcosa1_dapi_herm1_stitched	46	107.144	0.568805	2		syp3het	herm	5
DLW196het	2022_02_04_DLW196het_555rad51_488gfpcosa1_dapi_herm1_stitched	51	110.391	0.586039	2		syp3het	herm	5
DLW196het	2022_02_04_DLW196het_555rad51_488gfpcosa1_dapi_herm1_stitched	55	110.724	0.587805	1		syp3het	herm	6
DLW196het	2022_02_04_DLW196het_555rad51_488gfpcosa1_dapi_herm1_stitched	41	110.751	0.587949	3		syp3het	herm	6
DLW196het	2022_02_04_DLW196het_555rad51_488gfpcosa1_dapi_herm1_stitched	38	111.328	0.591012	5		syp3het	herm	6
DLW196het	2022_02_04_DLW196het_555rad51_488gfpcosa1_dapi_herm1_stitched	40	113.261	0.601278	0		syp3het	herm	6
DLW196het	2022_02_04_DLW196het_555rad51_488gfpcosa1_dapi_herm1_stitched	43	113.985	0.605117	1		syp3het	herm	6
DLW196het	2022_02_04_DLW196het_555rad51_488gfpcosa1_dapi_herm1_stitched	33	116.43	0.618098	6		syp3het	herm	0
DLW196het	2022_02_04_DLW196het_555rad51_488gfpcosa1_dapi_herm1_stitched	48	116.862	0.620395	6		syp3het	herm	4
DLW196het	2022_02_04_DLW196het_555rad51_488gfpcosa1_dapi_herm1_stitched	37	117.192	0.622147	1		syp3het	herm	6
DLW196het	2022_02_04_DLW196het_555rad51_488gfpcosa1_dapi_herm1_stitched	52	117.249	0.622449	1		syp3het	herm	6
DLW196het	2022_02_04_DLW196het_555rad51_488gfpcosa1_dapi_herm1_stitched	39	120.935	0.642015	2		syp3het	herm	5
DLW196het	2022_02_04_DLW196het_555rad51_488gfpcosa1_dapi_herm1_stitched	35	121.011	0.642417	0		syp3het	herm	6
DLW196het	2022_02_04_DLW196het_555rad51_488gfpcosa1_dapi_herm1_stitched	29	122.631	0.651022	8		syp3het	herm	0
DLW196het	2022_02_04_DLW196het_555rad51_488gfpcosa1_dapi_herm1_stitched	47	123.27	0.654414	3		syp3het	herm	6
DLW196het	2022_02_04_DLW196het_555rad51_488gfpcosa1_dapi_herm1_stitched	32	123.572	0.656012	1		syp3het	herm	6
DLW196het	2022_02_04_DLW196het_555rad51_488gfpcosa1_dapi_herm1_stitched	34	128.031	0.679689	2		syp3het	herm	6
DLW196het	2022_02_04_DLW196het_555rad51_488gfpcosa1_dapi_herm1_stitched	25	130.448	0.692516	2		syp3het	herm	6
DLW196het	2022_02_04_DLW196het_555rad51_488gfpcosa1_dapi_herm1_stitched	36	131.407	0.697611	1		syp3het	herm	4
DLW196het	2022_02_04_DLW196het_555rad51_488gfpcosa1_dapi_herm1_stitched	24	132.329	0.702502	1		syp3het	herm	5
DLW196het	2022_02_04_DLW196het_555rad51_488gfpcosa1_dapi_herm1_stitched	28	134.848	0.715878	8		syp3het	herm	6
DLW196het	2022_02_04_DLW196het_555rad51_488gfpcosa1_dapi_herm1_stitched	27	136.865	0.726583	0		syp3het	herm	6
DLW196het	2022_02_04_DLW196het_555rad51_488gfpcosa1_dapi_herm1_stitched	21	139.113	0.73852	1		syp3het	herm	6
DLW196het	2022_02_04_DLW196het_555rad51_488gfpcosa1_dapi_herm1_stitched	31	139.394	0.740011	1		syp3het	herm	6
DLW196het	2022_02_04_DLW196het_555rad51_488gfpcosa1_dapi_herm1_stitched	26	139.658	0.741412	2		syp3het	herm	6
DLW196het	2022_02_04_DLW196het_555rad51_488gfpcosa1_dapi_herm1_stitched	22	143.676	0.76274	0		syp3het	herm	5
DLW196het	2022_02_04_DLW196het_555rad51_488gfpcosa1_dapi_herm1_stitched	30	146.47	0.777576	1		syp3het	herm	4
DLW196het	2022_02_04_DLW196het_555rad51_488gfpcosa1_dapi_herm1_stitched	16	151.053	0.801904	2		syp3het	herm	6
DLW196het	2022_02_04_DLW196het_555rad51_488gfpcosa1_dapi_herm1_stitched	20	151.319	0.803316	0		syp3het	herm	6
DLW196het	2022_02_04_DLW196het_555rad51_488gfpcosa1_dapi_herm1_stitched	23	154.305	0.819168	1		syp3het	herm	5
DLW196het	2022_02_04_DLW196het_555rad51_488gfpcosa1_dapi_herm1_stitched	18	156.16	0.829018	2		syp3het	herm	6
DLW196het	2022_02_04_DLW196het_555rad51_488gfpcosa1_dapi_herm1_stitched	15	157.645	0.836899	0		syp3het	herm	6
DLW196het	2022_02_04_DLW196het_555rad51_488gfpcosa1_dapi_herm1_stitched	17	159.57	0.84712	0		syp3het	herm	6
DLW196het	2022_02_04_DLW196het_555rad51_488gfpcosa1_dapi_herm1_stitched	19	161.172	0.855627	2		syp3het	herm	6
DLW196het	2022_02_04_DLW196het_555rad51_488gfpcosa1_dapi_herm1_stitched	12	161.317	0.856396	0		syp3het	herm	6
DLW196het	2022_02_04_DLW196het_555rad51_488gfpcosa1_dapi_herm1_stitched	13	166.182	0.88222	0		syp3het	herm	6
DLW196het	2022_02_04_DLW196het_555rad51_488gfpcosa1_dapi_herm1_stitched	10	168.467	0.894354	0		syp3het	herm	6
DLW196het	2022_02_04_DLW196het_555rad51_488gfpcosa1_dapi_herm1_stitched	8	170.211	0.90361	2		syp3het	herm	6
DLW196het	2022_02_04_DLW196het_555rad51_488gfpcosa1_dapi_herm1_stitched	14	171.465	0.910267	1		syp3het	herm	6
DLW196het	2022_02_04_DLW196het_555rad51_488gfpcosa1_dapi_herm1_stitched	11	174.211	0.924845	0		syp3het	herm	5
DLW196het	2022_02_04_DLW196het_555rad51_488gfpcosa1_dapi_herm1_stitched	6	175.252	0.930372	1		syp3het	herm	6
DLW196het	2022_02_04_DLW196het_555rad51_488gfpcosa1_dapi_herm1_stitched	7	176.906	0.939154	2		syp3het	herm	6
DLW196het	2022_02_04_DLW196het_555rad51_488gfpcosa1_dapi_herm1_stitched	3	178.095	0.945464	2		syp3het	herm	6
DLW196het	2022_02_04_DLW196het_555rad51_488gfpcosa1_dapi_herm1_stitched	9	182.161	0.967051	1		syp3het	herm	6
DLW196het	2022_02_04_DLW196het_555rad51_488gfpcosa1_dapi_herm1_stitched	4	182.45	0.968583	0		syp3het	herm	6
DLW196het	2022_02_04_DLW196het_555rad51_488gfpcosa1_dapi_herm1_stitched	2	184.24	0.978089	1		syp3het	herm	5
DLW196het	2022_02_04_DLW196het_555rad51_488gfpcosa1_dapi_herm1_stitched	5	184.351	0.978677	0		syp3het	herm	6
DLW196het	2022_02_04_DLW196het_555rad51_488gfpcosa1_dapi_herm1_stitched	1	184.559	0.979782	0		syp3het	herm	6
DLW196het	2022_02_04_DLW196het_555rad51_488gfpcosa1_dapi_herm2_stitched	30	7.34499	0.0478624	8		syp3het	herm	2
DLW196het	2022_02_04_DLW196het_555rad51_488gfpcosa1_dapi_herm2_stitched	26	8.46471	0.0551589	20		syp3het	herm	2
DLW196het	2022_02_04_DLW196het_555rad51_488gfpcosa1_dapi_herm2_stitched	53	9.31725	0.0607144	7		syp3het	herm	0
DLW196het	2022_02_04_DLW196het_555rad51_488gfpcosa1_dapi_herm2_stitched	31	11.6949	0.076208	17		syp3het	herm	1
DLW196het	2022_02_04_DLW196het_555rad51_488gfpcosa1_dapi_herm2_stitched	54	13.0072	0.084759	3		syp3het	herm	2
DLW196het	2022_02_04_DLW196het_555rad51_488gfpcosa1_dapi_herm2_stitched	25	13.552	0.0883095	5		syp3het	herm	0
DLW196het	2022_02_04_DLW196het_555rad51_488gfpcosa1_dapi_herm2_stitched	52	15.4126	0.100433	6		syp3het	herm	0
DLW196het	2022_02_04_DLW196het_555rad51_488gfpcosa1_dapi_herm2_stitched	55	17.26	0.112472	2		syp3het	herm	0
DLW196het	2022_02_04_DLW196het_555rad51_488gfpcosa1_dapi_herm2_stitched	20	18.7938	0.122467	6		syp3het	herm	1
DLW196het	2022_02_04_DLW196het_555rad51_488gfpcosa1_dapi_herm2_stitched	24	19.5362	0.127304	11		syp3het	herm	0
DLW196het	2022_02_04_DLW196het_555rad51_488gfpcosa1_dapi_herm2_stitched	50	20.1993	0.131626	3		syp3het	herm	1
DLW196het	2022_02_04_DLW196het_555rad51_488gfpcosa1_dapi_herm2_stitched	29	22.4024	0.145981	6		syp3het	herm	1
DLW196het	2022_02_04_DLW196het_555rad51_488gfpcosa1_dapi_herm2_stitched	18	23.1411	0.150796	4		syp3het	herm	1
DLW196het	2022_02_04_DLW196het_555rad51_488gfpcosa1_dapi_herm2_stitched	45	26.284	0.171276	7		syp3het	herm	1
DLW196het	2022_02_04_DLW196het_555rad51_488gfpcosa1_dapi_herm2_stitched	10	27.0146	0.176036	6		syp3het	herm	2
DLW196het	2022_02_04_DLW196het_555rad51_488gfpcosa1_dapi_herm2_stitched	28	27.7119	0.18058	11		syp3het	herm	0
DLW196het	2022_02_04_DLW196het_555rad51_488gfpcosa1_dapi_herm2_stitched	15	29.1968	0.190257	8		syp3het	herm	2
DLW196het	2022_02_04_DLW196het_555rad51_488gfpcosa1_dapi_herm2_stitched	40	30.9547	0.201711	7		syp3het	herm	3
DLW196het	2022_02_04_DLW196het_555rad51_488gfpcosa1_dapi_herm2_stitched	27	34.0959	0.22218	3		syp3het	herm	0
DLW196het	2022_02_04_DLW196het_555rad51_488gfpcosa1_dapi_herm2_stitched	14	35.1252	0.228888	1		syp3het	herm	3
DLW196het	2022_02_04_DLW196het_555rad51_488gfpcosa1_dapi_herm2_stitched	44	35.2825	0.229913	4		syp3het	herm	2
DLW196het	2022_02_04_DLW196het_555rad51_488gfpcosa1_dapi_herm2_stitched	22	37.6605	0.245408	1		syp3het	herm	0
DLW196het	2022_02_04_DLW196het_555rad51_488gfpcosa1_dapi_herm2_stitched	9	39.1863	0.255351	3		syp3het	herm	0
DLW196het	2022_02_04_DLW196het_555rad51_488gfpcosa1_dapi_herm2_stitched	48	39.448	0.257057	7		syp3het	herm	0
DLW196het	2022_02_04_DLW196het_555rad51_488gfpcosa1_dapi_herm2_stitched	17	42.3888	0.276219	4		syp3het	herm	1
DLW196het	2022_02_04_DLW196het_555rad51_488gfpcosa1_dapi_herm2_stitched	21	44.2838	0.288568	4		syp3het	herm	0
DLW196het	2022_02_04_DLW196het_555rad51_488gfpcosa1_dapi_herm2_stitched	51	45.1378	0.294133	4		syp3het	herm	0
DLW196het	2022_02_04_DLW196het_555rad51_488gfpcosa1_dapi_herm2_stitched	7	45.7613	0.298196	3		syp3het	herm	1
DLW196het	2022_02_04_DLW196het_555rad51_488gfpcosa1_dapi_herm2_stitched	47	47.2873	0.30814	4		syp3het	herm	0
DLW196het	2022_02_04_DLW196het_555rad51_488gfpcosa1_dapi_herm2_stitched	16	47.9069	0.312177	1		syp3het	herm	0
DLW196het	2022_02_04_DLW196het_555rad51_488gfpcosa1_dapi_herm2_stitched	38	49.0219	0.319444	3		syp3het	herm	0
DLW196het	2022_02_04_DLW196het_555rad51_488gfpcosa1_dapi_herm2_stitched	23	49.5568	0.322929	3		syp3het	herm	0
DLW196het	2022_02_04_DLW196het_555rad51_488gfpcosa1_dapi_herm2_stitched	8	53.1229	0.346167	3		syp3het	herm	2
DLW196het	2022_02_04_DLW196het_555rad51_488gfpcosa1_dapi_herm2_stitched	49	53.2208	0.346805	5		syp3het	herm	0
DLW196het	2022_02_04_DLW196het_555rad51_488gfpcosa1_dapi_herm2_stitched	43	54.1433	0.352816	1		syp3het	herm	0
DLW196het	2022_02_04_DLW196het_555rad51_488gfpcosa1_dapi_herm2_stitched	13	55.7938	0.363571	3		syp3het	herm	1
DLW196het	2022_02_04_DLW196het_555rad51_488gfpcosa1_dapi_herm2_stitched	37	56.0144	0.365009	8		syp3het	herm	1
DLW196het	2022_02_04_DLW196het_555rad51_488gfpcosa1_dapi_herm2_stitched	5	59.7611	0.389423	5		syp3het	herm	0
DLW196het	2022_02_04_DLW196het_555rad51_488gfpcosa1_dapi_herm2_stitched	46	60.108	0.391684	5		syp3het	herm	2
DLW196het	2022_02_04_DLW196het_555rad51_488gfpcosa1_dapi_herm2_stitched	39	62.0462	0.404314	3		syp3het	herm	0
DLW196het	2022_02_04_DLW196het_555rad51_488gfpcosa1_dapi_herm2_stitched	11	63.2263	0.412004	2		syp3het	herm	2
DLW196het	2022_02_04_DLW196het_555rad51_488gfpcosa1_dapi_herm2_stitched	3	65.7809	0.428651	1		syp3het	herm	0
DLW196het	2022_02_04_DLW196het_555rad51_488gfpcosa1_dapi_herm2_stitched	42	67.6101	0.44057	2		syp3het	herm	0
DLW196het	2022_02_04_DLW196het_555rad51_488gfpcosa1_dapi_herm2_stitched	36	68.5521	0.446709	5		syp3het	herm	1
DLW196het	2022_02_04_DLW196het_555rad51_488gfpcosa1_dapi_herm2_stitched	12	69.6221	0.453681	2		syp3het	herm	3
DLW196het	2022_02_04_DLW196het_555rad51_488gfpcosa1_dapi_herm2_stitched	4	71.4517	0.465603	4		syp3het	herm	1
DLW196het	2022_02_04_DLW196het_555rad51_488gfpcosa1_dapi_herm2_stitched	19	73.7473	0.480562	1		syp3het	herm	3
DLW196het	2022_02_04_DLW196het_555rad51_488gfpcosa1_dapi_herm2_stitched	41	74.2444	0.483801	4		syp3het	herm	6
DLW196het	2022_02_04_DLW196het_555rad51_488gfpcosa1_dapi_herm2_stitched	34	74.6842	0.486667	3		syp3het	herm	0
DLW196het	2022_02_04_DLW196het_555rad51_488gfpcosa1_dapi_herm2_stitched	1	76.547	0.498806	4		syp3het	herm	3
DLW196het	2022_02_04_DLW196het_555rad51_488gfpcosa1_dapi_herm2_stitched	35	80.0143	0.5214	0		syp3het	herm	5
DLW196het	2022_02_04_DLW196het_555rad51_488gfpcosa1_dapi_herm2_stitched	32	82.2985	0.536285	1		syp3het	herm	6
DLW196het	2022_02_04_DLW196het_555rad51_488gfpcosa1_dapi_herm2_stitched	2	82.4966	0.537576	3		syp3het	herm	5
DLW196het	2022_02_04_DLW196het_555rad51_488gfpcosa1_dapi_herm2_stitched	6	86.1544	0.561411	3		syp3het	herm	5
DLW196het	2022_02_04_DLW196het_555rad51_488gfpcosa1_dapi_herm2_stitched	33	86.2758	0.562202	2		syp3het	herm	6
DLW196het	2022_02_04_DLW196het_555rad51_488gfpcosa1_dapi_herm2_stitched	75	88.0685	0.573884	3		syp3het	herm	4
DLW196het	2022_02_04_DLW196het_555rad51_488gfpcosa1_dapi_herm2_stitched	90	92.1555	0.600517	0		syp3het	herm	6
DLW196het	2022_02_04_DLW196het_555rad51_488gfpcosa1_dapi_herm2_stitched	95	92.3264	0.60163	3		syp3het	herm	6
DLW196het	2022_02_04_DLW196het_555rad51_488gfpcosa1_dapi_herm2_stitched	79	92.6318	0.60362	4		syp3het	herm	4
DLW196het	2022_02_04_DLW196het_555rad51_488gfpcosa1_dapi_herm2_stitched	91	96.6173	0.629591	1		syp3het	herm	6
DLW196het	2022_02_04_DLW196het_555rad51_488gfpcosa1_dapi_herm2_stitched	82	99.3249	0.647235	2		syp3het	herm	6
DLW196het	2022_02_04_DLW196het_555rad51_488gfpcosa1_dapi_herm2_stitched	77	99.3751	0.647562	1		syp3het	herm	6
DLW196het	2022_02_04_DLW196het_555rad51_488gfpcosa1_dapi_herm2_stitched	94	99.941	0.65125	0		syp3het	herm	6
DLW196het	2022_02_04_DLW196het_555rad51_488gfpcosa1_dapi_herm2_stitched	64	100.454	0.654593	3		syp3het	herm	5
DLW196het	2022_02_04_DLW196het_555rad51_488gfpcosa1_dapi_herm2_stitched	89	102.479	0.667785	8		syp3het	herm	0
DLW196het	2022_02_04_DLW196het_555rad51_488gfpcosa1_dapi_herm2_stitched	88	102.589	0.668506	2		syp3het	herm	6
DLW196het	2022_02_04_DLW196het_555rad51_488gfpcosa1_dapi_herm2_stitched	72	105.668	0.688569	1		syp3het	herm	6
DLW196het	2022_02_04_DLW196het_555rad51_488gfpcosa1_dapi_herm2_stitched	70	106.358	0.693062	2		syp3het	herm	6
DLW196het	2022_02_04_DLW196het_555rad51_488gfpcosa1_dapi_herm2_stitched	92	107.431	0.700053	1		syp3het	herm	6
DLW196het	2022_02_04_DLW196het_555rad51_488gfpcosa1_dapi_herm2_stitched	84	108.9	0.709627	0		syp3het	herm	6
DLW196het	2022_02_04_DLW196het_555rad51_488gfpcosa1_dapi_herm2_stitched	80	108.985	0.710181	2		syp3het	herm	5
DLW196het	2022_02_04_DLW196het_555rad51_488gfpcosa1_dapi_herm2_stitched	93	112.235	0.73136	3		syp3het	herm	6
DLW196het	2022_02_04_DLW196het_555rad51_488gfpcosa1_dapi_herm2_stitched	61	113.965	0.742633	2		syp3het	herm	6
DLW196het	2022_02_04_DLW196het_555rad51_488gfpcosa1_dapi_herm2_stitched	69	114.38	0.745336	2		syp3het	herm	6
DLW196het	2022_02_04_DLW196het_555rad51_488gfpcosa1_dapi_herm2_stitched	86	114.61	0.746836	2		syp3het	herm	6
DLW196het	2022_02_04_DLW196het_555rad51_488gfpcosa1_dapi_herm2_stitched	81	115.668	0.753734	0		syp3het	herm	6
DLW196het	2022_02_04_DLW196het_555rad51_488gfpcosa1_dapi_herm2_stitched	66	119.019	0.775565	1		syp3het	herm	6
DLW196het	2022_02_04_DLW196het_555rad51_488gfpcosa1_dapi_herm2_stitched	71	121.073	0.788953	0		syp3het	herm	6
DLW196het	2022_02_04_DLW196het_555rad51_488gfpcosa1_dapi_herm2_stitched	83	121.754	0.79339	0		syp3het	herm	6
DLW196het	2022_02_04_DLW196het_555rad51_488gfpcosa1_dapi_herm2_stitched	74	123.154	0.802514	1		syp3het	herm	6
DLW196het	2022_02_04_DLW196het_555rad51_488gfpcosa1_dapi_herm2_stitched	87	126.518	0.824433	1		syp3het	herm	6
DLW196het	2022_02_04_DLW196het_555rad51_488gfpcosa1_dapi_herm2_stitched	73	127.685	0.832039	1		syp3het	herm	6
DLW196het	2022_02_04_DLW196het_555rad51_488gfpcosa1_dapi_herm2_stitched	63	128.115	0.834841	0		syp3het	herm	6
DLW196het	2022_02_04_DLW196het_555rad51_488gfpcosa1_dapi_herm2_stitched	85	131.615	0.857646	0		syp3het	herm	6
DLW196het	2022_02_04_DLW196het_555rad51_488gfpcosa1_dapi_herm2_stitched	65	133.807	0.871933	0		syp3het	herm	6
DLW196het	2022_02_04_DLW196het_555rad51_488gfpcosa1_dapi_herm2_stitched	58	135.251	0.881342	0		syp3het	herm	6
DLW196het	2022_02_04_DLW196het_555rad51_488gfpcosa1_dapi_herm2_stitched	68	136.004	0.886247	0		syp3het	herm	6
DLW196het	2022_02_04_DLW196het_555rad51_488gfpcosa1_dapi_herm2_stitched	76	137.807	0.897997	0		syp3het	herm	6
DLW196het	2022_02_04_DLW196het_555rad51_488gfpcosa1_dapi_herm2_stitched	59	141.098	0.919439	0		syp3het	herm	6
DLW196het	2022_02_04_DLW196het_555rad51_488gfpcosa1_dapi_herm2_stitched	78	142.065	0.925746	0		syp3het	herm	6
DLW196het	2022_02_04_DLW196het_555rad51_488gfpcosa1_dapi_herm2_stitched	67	144.79	0.943503	0		syp3het	herm	6
DLW196het	2022_02_04_DLW196het_555rad51_488gfpcosa1_dapi_herm2_stitched	60	147.581	0.961689	0		syp3het	herm	5
DLW196het	2022_02_04_DLW196het_555rad51_488gfpcosa1_dapi_herm2_stitched	62	148.058	0.964798	1		syp3het	herm	6
DLW196het	2022_02_04_DLW196het_555rad51_488gfpcosa1_dapi_herm2_stitched	56	150.552	0.981047	0		syp3het	herm	6
DLW196het	2022_02_04_DLW196het_555rad51_488gfpcosa1_dapi_herm2_stitched	57	153.46	1	0		syp3het	herm	6
DLW196het	2022_02_04_DLW196het_555rad51_488gfpcosa1_dapi_herm3_stitched	78	1.03295	0.00709637	5		syp3het	herm	0
DLW196het	2022_02_04_DLW196het_555rad51_488gfpcosa1_dapi_herm3_stitched	77	1.95924	0.01346	6		syp3het	herm	0
DLW196het	2022_02_04_DLW196het_555rad51_488gfpcosa1_dapi_herm3_stitched	75	5.29512	0.0363775	3		syp3het	herm	0
DLW196het	2022_02_04_DLW196het_555rad51_488gfpcosa1_dapi_herm3_stitched	80	7.23467	0.0497022	4		syp3het	herm	0
DLW196het	2022_02_04_DLW196het_555rad51_488gfpcosa1_dapi_herm3_stitched	74	7.52775	0.0517157	3		syp3het	herm	0
DLW196het	2022_02_04_DLW196het_555rad51_488gfpcosa1_dapi_herm3_stitched	70	12.4106	0.0852612	4		syp3het	herm	0
DLW196het	2022_02_04_DLW196het_555rad51_488gfpcosa1_dapi_herm3_stitched	69	12.4735	0.0856932	5		syp3het	herm	0
DLW196het	2022_02_04_DLW196het_555rad51_488gfpcosa1_dapi_herm3_stitched	73	12.4835	0.0857616	4		syp3het	herm	0
DLW196het	2022_02_04_DLW196het_555rad51_488gfpcosa1_dapi_herm3_stitched	79	12.6082	0.0866183	3		syp3het	herm	0
DLW196het	2022_02_04_DLW196het_555rad51_488gfpcosa1_dapi_herm3_stitched	122	12.875	0.088451	11		syp3het	herm	0
DLW196het	2022_02_04_DLW196het_555rad51_488gfpcosa1_dapi_herm3_stitched	76	13.3108	0.0914451	11		syp3het	herm	0
DLW196het	2022_02_04_DLW196het_555rad51_488gfpcosa1_dapi_herm3_stitched	72	17.3575	0.119246	9		syp3het	herm	0
DLW196het	2022_02_04_DLW196het_555rad51_488gfpcosa1_dapi_herm3_stitched	121	17.6713	0.121402	4		syp3het	herm	0
DLW196het	2022_02_04_DLW196het_555rad51_488gfpcosa1_dapi_herm3_stitched	67	18.473	0.126909	3		syp3het	herm	0
DLW196het	2022_02_04_DLW196het_555rad51_488gfpcosa1_dapi_herm3_stitched	71	23.4471	0.161082	6		syp3het	herm	0
DLW196het	2022_02_04_DLW196het_555rad51_488gfpcosa1_dapi_herm3_stitched	61	25.5679	0.175652	4		syp3het	herm	0
DLW196het	2022_02_04_DLW196het_555rad51_488gfpcosa1_dapi_herm3_stitched	120	26.0175	0.17874	14		syp3het	herm	0
DLW196het	2022_02_04_DLW196het_555rad51_488gfpcosa1_dapi_herm3_stitched	68	28.3146	0.194521	9		syp3het	herm	0
DLW196het	2022_02_04_DLW196het_555rad51_488gfpcosa1_dapi_herm3_stitched	66	28.7095	0.197235	3		syp3het	herm	0
DLW196het	2022_02_04_DLW196het_555rad51_488gfpcosa1_dapi_herm3_stitched	119	30.6568	0.210612	8		syp3het	herm	0
DLW196het	2022_02_04_DLW196het_555rad51_488gfpcosa1_dapi_herm3_stitched	59	31.1378	0.213917	4		syp3het	herm	0
DLW196het	2022_02_04_DLW196het_555rad51_488gfpcosa1_dapi_herm3_stitched	62	31.4122	0.215802	4		syp3het	herm	0
DLW196het	2022_02_04_DLW196het_555rad51_488gfpcosa1_dapi_herm3_stitched	117	33.7718	0.232012	2		syp3het	herm	0
DLW196het	2022_02_04_DLW196het_555rad51_488gfpcosa1_dapi_herm3_stitched	65	33.8958	0.232864	4		syp3het	herm	0
DLW196het	2022_02_04_DLW196het_555rad51_488gfpcosa1_dapi_herm3_stitched	63	34.7734	0.238893	8		syp3het	herm	0
DLW196het	2022_02_04_DLW196het_555rad51_488gfpcosa1_dapi_herm3_stitched	118	35.3123	0.242595	3		syp3het	herm	3
DLW196het	2022_02_04_DLW196het_555rad51_488gfpcosa1_dapi_herm3_stitched	56	36.7242	0.252295	5		syp3het	herm	0
DLW196het	2022_02_04_DLW196het_555rad51_488gfpcosa1_dapi_herm3_stitched	60	36.8505	0.253163	8		syp3het	herm	0
DLW196het	2022_02_04_DLW196het_555rad51_488gfpcosa1_dapi_herm3_stitched	113	38.2104	0.262506	8		syp3het	herm	3
DLW196het	2022_02_04_DLW196het_555rad51_488gfpcosa1_dapi_herm3_stitched	115	39.2837	0.269879	7		syp3het	herm	4
DLW196het	2022_02_04_DLW196het_555rad51_488gfpcosa1_dapi_herm3_stitched	50	39.5643	0.271807	3		syp3het	herm	1
DLW196het	2022_02_04_DLW196het_555rad51_488gfpcosa1_dapi_herm3_stitched	54	40.4711	0.278037	2		syp3het	herm	3
DLW196het	2022_02_04_DLW196het_555rad51_488gfpcosa1_dapi_herm3_stitched	64	42.642	0.29295	8		syp3het	herm	0
DLW196het	2022_02_04_DLW196het_555rad51_488gfpcosa1_dapi_herm3_stitched	58	42.7561	0.293735	1		syp3het	herm	0
DLW196het	2022_02_04_DLW196het_555rad51_488gfpcosa1_dapi_herm3_stitched	116	43.9903	0.302213	6		syp3het	herm	1
DLW196het	2022_02_04_DLW196het_555rad51_488gfpcosa1_dapi_herm3_stitched	111	44.9741	0.308972	5		syp3het	herm	2
DLW196het	2022_02_04_DLW196het_555rad51_488gfpcosa1_dapi_herm3_stitched	55	46.9497	0.322544	2		syp3het	herm	6
DLW196het	2022_02_04_DLW196het_555rad51_488gfpcosa1_dapi_herm3_stitched	51	47.9491	0.32941	4		syp3het	herm	4
DLW196het	2022_02_04_DLW196het_555rad51_488gfpcosa1_dapi_herm3_stitched	57	48.3018	0.331834	11		syp3het	herm	0
DLW196het	2022_02_04_DLW196het_555rad51_488gfpcosa1_dapi_herm3_stitched	112	48.6348	0.334121	5		syp3het	herm	0
DLW196het	2022_02_04_DLW196het_555rad51_488gfpcosa1_dapi_herm3_stitched	46	49.8923	0.342761	8		syp3het	herm	2
DLW196het	2022_02_04_DLW196het_555rad51_488gfpcosa1_dapi_herm3_stitched	114	51.2811	0.352302	11		syp3het	herm	5
DLW196het	2022_02_04_DLW196het_555rad51_488gfpcosa1_dapi_herm3_stitched	108	53.4728	0.367358	2		syp3het	herm	6
DLW196het	2022_02_04_DLW196het_555rad51_488gfpcosa1_dapi_herm3_stitched	47	54.0419	0.371268	0		syp3het	herm	6
DLW196het	2022_02_04_DLW196het_555rad51_488gfpcosa1_dapi_herm3_stitched	52	54.5518	0.374771	7		syp3het	herm	4
DLW196het	2022_02_04_DLW196het_555rad51_488gfpcosa1_dapi_herm3_stitched	43	56.0115	0.384799	6		syp3het	herm	6
DLW196het	2022_02_04_DLW196het_555rad51_488gfpcosa1_dapi_herm3_stitched	110	56.0229	0.384877	6		syp3het	herm	4
DLW196het	2022_02_04_DLW196het_555rad51_488gfpcosa1_dapi_herm3_stitched	38	57.6596	0.396122	5		syp3het	herm	6
DLW196het	2022_02_04_DLW196het_555rad51_488gfpcosa1_dapi_herm3_stitched	53	59.7758	0.41066	3		syp3het	herm	6
DLW196het	2022_02_04_DLW196het_555rad51_488gfpcosa1_dapi_herm3_stitched	49	60.3328	0.414487	1		syp3het	herm	5
DLW196het	2022_02_04_DLW196het_555rad51_488gfpcosa1_dapi_herm3_stitched	106	60.8081	0.417752	2		syp3het	herm	1
DLW196het	2022_02_04_DLW196het_555rad51_488gfpcosa1_dapi_herm3_stitched	44	60.9968	0.419048	3		syp3het	herm	5
DLW196het	2022_02_04_DLW196het_555rad51_488gfpcosa1_dapi_herm3_stitched	35	62.9152	0.432228	4		syp3het	herm	6
DLW196het	2022_02_04_DLW196het_555rad51_488gfpcosa1_dapi_herm3_stitched	109	63.241	0.434466	8		syp3het	herm	5
DLW196het	2022_02_04_DLW196het_555rad51_488gfpcosa1_dapi_herm3_stitched	48	65.6854	0.451259	3		syp3het	herm	6
DLW196het	2022_02_04_DLW196het_555rad51_488gfpcosa1_dapi_herm3_stitched	45	66.1365	0.454358	3		syp3het	herm	6
DLW196het	2022_02_04_DLW196het_555rad51_488gfpcosa1_dapi_herm3_stitched	102	66.1988	0.454786	5		syp3het	herm	6
DLW196het	2022_02_04_DLW196het_555rad51_488gfpcosa1_dapi_herm3_stitched	36	68.7805	0.472522	4		syp3het	herm	6
DLW196het	2022_02_04_DLW196het_555rad51_488gfpcosa1_dapi_herm3_stitched	104	68.848	0.472986	5		syp3het	herm	6
DLW196het	2022_02_04_DLW196het_555rad51_488gfpcosa1_dapi_herm3_stitched	42	71.2835	0.489718	14		syp3het	herm	0
DLW196het	2022_02_04_DLW196het_555rad51_488gfpcosa1_dapi_herm3_stitched	107	71.2884	0.489751	5		syp3het	herm	6
DLW196het	2022_02_04_DLW196het_555rad51_488gfpcosa1_dapi_herm3_stitched	29	71.5737	0.491711	3		syp3het	herm	6
DLW196het	2022_02_04_DLW196het_555rad51_488gfpcosa1_dapi_herm3_stitched	39	73.1425	0.50249	0		syp3het	herm	6
DLW196het	2022_02_04_DLW196het_555rad51_488gfpcosa1_dapi_herm3_stitched	84	74.1434	0.509366	3		syp3het	herm	6
DLW196het	2022_02_04_DLW196het_555rad51_488gfpcosa1_dapi_herm3_stitched	27	76.3539	0.524552	1		syp3het	herm	6
DLW196het	2022_02_04_DLW196het_555rad51_488gfpcosa1_dapi_herm3_stitched	101	76.5827	0.526123	3		syp3het	herm	6
DLW196het	2022_02_04_DLW196het_555rad51_488gfpcosa1_dapi_herm3_stitched	40	78.2587	0.537638	2		syp3het	herm	6
DLW196het	2022_02_04_DLW196het_555rad51_488gfpcosa1_dapi_herm3_stitched	21	78.9162	0.542155	4		syp3het	herm	5
DLW196het	2022_02_04_DLW196het_555rad51_488gfpcosa1_dapi_herm3_stitched	105	79.2836	0.544678	4		syp3het	herm	6
DLW196het	2022_02_04_DLW196het_555rad51_488gfpcosa1_dapi_herm3_stitched	34	79.939	0.549181	0		syp3het	herm	6
DLW196het	2022_02_04_DLW196het_555rad51_488gfpcosa1_dapi_herm3_stitched	86	81.5386	0.56017	3		syp3het	herm	6
DLW196het	2022_02_04_DLW196het_555rad51_488gfpcosa1_dapi_herm3_stitched	26	83.4897	0.573574	1		syp3het	herm	6
DLW196het	2022_02_04_DLW196het_555rad51_488gfpcosa1_dapi_herm3_stitched	81	83.6194	0.574465	3		syp3het	herm	6
DLW196het	2022_02_04_DLW196het_555rad51_488gfpcosa1_dapi_herm3_stitched	41	84.5397	0.580788	0		syp3het	herm	6
DLW196het	2022_02_04_DLW196het_555rad51_488gfpcosa1_dapi_herm3_stitched	33	84.7941	0.582536	3		syp3het	herm	6
DLW196het	2022_02_04_DLW196het_555rad51_488gfpcosa1_dapi_herm3_stitched	19	85.7675	0.589223	2		syp3het	herm	6
DLW196het	2022_02_04_DLW196het_555rad51_488gfpcosa1_dapi_herm3_stitched	103	86.469	0.594043	4		syp3het	herm	6
DLW196het	2022_02_04_DLW196het_555rad51_488gfpcosa1_dapi_herm3_stitched	14	88.206	0.605976	2		syp3het	herm	6
DLW196het	2022_02_04_DLW196het_555rad51_488gfpcosa1_dapi_herm3_stitched	87	89.772	0.616734	0		syp3het	herm	6
DLW196het	2022_02_04_DLW196het_555rad51_488gfpcosa1_dapi_herm3_stitched	23	89.9629	0.618046	6		syp3het	herm	6
DLW196het	2022_02_04_DLW196het_555rad51_488gfpcosa1_dapi_herm3_stitched	20	92.087	0.632638	4		syp3het	herm	6
DLW196het	2022_02_04_DLW196het_555rad51_488gfpcosa1_dapi_herm3_stitched	31	92.1388	0.632994	2		syp3het	herm	6
DLW196het	2022_02_04_DLW196het_555rad51_488gfpcosa1_dapi_herm3_stitched	82	92.8127	0.637624	1		syp3het	herm	6
DLW196het	2022_02_04_DLW196het_555rad51_488gfpcosa1_dapi_herm3_stitched	94	96.5738	0.663462	7		syp3het	herm	6
DLW196het	2022_02_04_DLW196het_555rad51_488gfpcosa1_dapi_herm3_stitched	24	97.5439	0.670127	3		syp3het	herm	6
DLW196het	2022_02_04_DLW196het_555rad51_488gfpcosa1_dapi_herm3_stitched	30	98.0691	0.673735	2		syp3het	herm	6
DLW196het	2022_02_04_DLW196het_555rad51_488gfpcosa1_dapi_herm3_stitched	37	98.5941	0.677342	0		syp3het	herm	6
DLW196het	2022_02_04_DLW196het_555rad51_488gfpcosa1_dapi_herm3_stitched	89	99.1023	0.680833	1		syp3het	herm	6
DLW196het	2022_02_04_DLW196het_555rad51_488gfpcosa1_dapi_herm3_stitched	15	100.889	0.693106	0		syp3het	herm	6
DLW196het	2022_02_04_DLW196het_555rad51_488gfpcosa1_dapi_herm3_stitched	8	101.067	0.694328	2		syp3het	herm	5
DLW196het	2022_02_04_DLW196het_555rad51_488gfpcosa1_dapi_herm3_stitched	83	101.352	0.696287	0		syp3het	herm	5
DLW196het	2022_02_04_DLW196het_555rad51_488gfpcosa1_dapi_herm3_stitched	18	104.133	0.715394	0		syp3het	herm	5
DLW196het	2022_02_04_DLW196het_555rad51_488gfpcosa1_dapi_herm3_stitched	96	104.27	0.716335	1		syp3het	herm	6
DLW196het	2022_02_04_DLW196het_555rad51_488gfpcosa1_dapi_herm3_stitched	3	104.423	0.717384	0		syp3het	herm	6
DLW196het	2022_02_04_DLW196het_555rad51_488gfpcosa1_dapi_herm3_stitched	25	104.705	0.719324	1		syp3het	herm	6
DLW196het	2022_02_04_DLW196het_555rad51_488gfpcosa1_dapi_herm3_stitched	91	107.491	0.738466	1		syp3het	herm	6
DLW196het	2022_02_04_DLW196het_555rad51_488gfpcosa1_dapi_herm3_stitched	32	107.675	0.739729	1		syp3het	herm	6
DLW196het	2022_02_04_DLW196het_555rad51_488gfpcosa1_dapi_herm3_stitched	2	108.445	0.745019	0		syp3het	herm	6
DLW196het	2022_02_04_DLW196het_555rad51_488gfpcosa1_dapi_herm3_stitched	85	110.44	0.758726	0		syp3het	herm	6
DLW196het	2022_02_04_DLW196het_555rad51_488gfpcosa1_dapi_herm3_stitched	22	110.916	0.761991	1		syp3het	herm	6
DLW196het	2022_02_04_DLW196het_555rad51_488gfpcosa1_dapi_herm3_stitched	17	111.603	0.766712	0		syp3het	herm	6
DLW196het	2022_02_04_DLW196het_555rad51_488gfpcosa1_dapi_herm3_stitched	98	114.972	0.78986	0		syp3het	herm	6
DLW196het	2022_02_04_DLW196het_555rad51_488gfpcosa1_dapi_herm3_stitched	7	115.051	0.790398	1		syp3het	herm	6
DLW196het	2022_02_04_DLW196het_555rad51_488gfpcosa1_dapi_herm3_stitched	92	116.322	0.799131	0		syp3het	herm	6
DLW196het	2022_02_04_DLW196het_555rad51_488gfpcosa1_dapi_herm3_stitched	1	116.411	0.799745	4		syp3het	herm	6
DLW196het	2022_02_04_DLW196het_555rad51_488gfpcosa1_dapi_herm3_stitched	88	119.139	0.818484	0		syp3het	herm	6
DLW196het	2022_02_04_DLW196het_555rad51_488gfpcosa1_dapi_herm3_stitched	28	120.875	0.830409	1		syp3het	herm	6
DLW196het	2022_02_04_DLW196het_555rad51_488gfpcosa1_dapi_herm3_stitched	5	121.287	0.833245	1		syp3het	herm	6
DLW196het	2022_02_04_DLW196het_555rad51_488gfpcosa1_dapi_herm3_stitched	11	122.276	0.840039	0		syp3het	herm	6
DLW196het	2022_02_04_DLW196het_555rad51_488gfpcosa1_dapi_herm3_stitched	90	125.427	0.861682	0		syp3het	herm	6
DLW196het	2022_02_04_DLW196het_555rad51_488gfpcosa1_dapi_herm3_stitched	97	126.085	0.866204	1		syp3het	herm	6
DLW196het	2022_02_04_DLW196het_555rad51_488gfpcosa1_dapi_herm3_stitched	99	127.42	0.875373	0		syp3het	herm	6
DLW196het	2022_02_04_DLW196het_555rad51_488gfpcosa1_dapi_herm3_stitched	6	127.633	0.876837	1		syp3het	herm	6
DLW196het	2022_02_04_DLW196het_555rad51_488gfpcosa1_dapi_herm3_stitched	93	132.504	0.910304	0		syp3het	herm	6
DLW196het	2022_02_04_DLW196het_555rad51_488gfpcosa1_dapi_herm3_stitched	9	133.303	0.915795	0		syp3het	herm	6
DLW196het	2022_02_04_DLW196het_555rad51_488gfpcosa1_dapi_herm3_stitched	16	134.155	0.921646	0		syp3het	herm	6
DLW196het	2022_02_04_DLW196het_555rad51_488gfpcosa1_dapi_herm3_stitched	4	135.635	0.931816	0		syp3het	herm	6
DLW196het	2022_02_04_DLW196het_555rad51_488gfpcosa1_dapi_herm3_stitched	12	137.24	0.942843	0		syp3het	herm	6
DLW196het	2022_02_04_DLW196het_555rad51_488gfpcosa1_dapi_herm3_stitched	100	139.925	0.961286	0		syp3het	herm	6
DLW196het	2022_02_04_DLW196het_555rad51_488gfpcosa1_dapi_herm3_stitched	95	140.211	0.963253	1		syp3het	herm	6
DLW196het	2022_02_04_DLW196het_555rad51_488gfpcosa1_dapi_herm3_stitched	10	141.233	0.970275	0		syp3het	herm	6
DLW196het	2022_02_04_DLW196het_555rad51_488gfpcosa1_dapi_herm3_stitched	13	144.804	0.994802	1		syp3het	herm	6
DLW211het	2022_02_25_DLW211het_488ollascosa1_555rad51_male2_stitched	74	0.276807	0.00135083	8		syp2het	male	0
DLW211het	2022_02_25_DLW211het_488ollascosa1_555rad51_male2_stitched	78	0.988765	0.00482522	10		syp2het	male	0
DLW211het	2022_02_25_DLW211het_488ollascosa1_555rad51_male2_stitched	82	1.94936	0.00951299	14		syp2het	male	0
DLW211het	2022_02_25_DLW211het_488ollascosa1_555rad51_male2_stitched	55	2.17168	0.0105979	13		syp2het	male	0
DLW211het	2022_02_25_DLW211het_488ollascosa1_555rad51_male2_stitched	71	2.19564	0.0107148	15		syp2het	male	1
DLW211het	2022_02_25_DLW211het_488ollascosa1_555rad51_male2_stitched	83	2.5181	0.0122885	12		syp2het	male	0
DLW211het	2022_02_25_DLW211het_488ollascosa1_555rad51_male2_stitched	73	4.64203	0.0226533	12		syp2het	male	0
DLW211het	2022_02_25_DLW211het_488ollascosa1_555rad51_male2_stitched	59	6.84615	0.0334095	21		syp2het	male	0
DLW211het	2022_02_25_DLW211het_488ollascosa1_555rad51_male2_stitched	85	7.00903	0.0342044	18		syp2het	male	0
DLW211het	2022_02_25_DLW211het_488ollascosa1_555rad51_male2_stitched	46	7.56775	0.036931	13		syp2het	male	0
DLW211het	2022_02_25_DLW211het_488ollascosa1_555rad51_male2_stitched	60	10.5132	0.0513051	17		syp2het	male	0
DLW211het	2022_02_25_DLW211het_488ollascosa1_555rad51_male2_stitched	76	10.5151	0.0513142	16		syp2het	male	0
DLW211het	2022_02_25_DLW211het_488ollascosa1_555rad51_male2_stitched	56	10.8184	0.0527945	9		syp2het	male	0
DLW211het	2022_02_25_DLW211het_488ollascosa1_555rad51_male2_stitched	75	12.1226	0.0591589	10		syp2het	male	1
DLW211het	2022_02_25_DLW211het_488ollascosa1_555rad51_male2_stitched	87	12.4212	0.060616	16		syp2het	male	1
DLW211het	2022_02_25_DLW211het_488ollascosa1_555rad51_male2_stitched	72	16.1072	0.0786039	13		syp2het	male	0
DLW211het	2022_02_25_DLW211het_488ollascosa1_555rad51_male2_stitched	77	16.6232	0.0811221	12		syp2het	male	0
DLW211het	2022_02_25_DLW211het_488ollascosa1_555rad51_male2_stitched	80	17.2512	0.0841868	8		syp2het	male	0
DLW211het	2022_02_25_DLW211het_488ollascosa1_555rad51_male2_stitched	86	17.4564	0.0851882	13		syp2het	male	0
DLW211het	2022_02_25_DLW211het_488ollascosa1_555rad51_male2_stitched	57	18.5347	0.0904504	15		syp2het	male	0
DLW211het	2022_02_25_DLW211het_488ollascosa1_555rad51_male2_stitched	57	18.8197	0.0918409	15		syp2het	male	0
DLW211het	2022_02_25_DLW211het_488ollascosa1_555rad51_male2_stitched	65	20.6335	0.100693	4		syp2het	male	0
DLW211het	2022_02_25_DLW211het_488ollascosa1_555rad51_male2_stitched	66	20.9027	0.102006	7		syp2het	male	1
DLW211het	2022_02_25_DLW211het_488ollascosa1_555rad51_male2_stitched	37	21.8811	0.106781	13		syp2het	male	0
DLW211het	2022_02_25_DLW211het_488ollascosa1_555rad51_male2_stitched	43	23.0685	0.112575	5		syp2het	male	0
DLW211het	2022_02_25_DLW211het_488ollascosa1_555rad51_male2_stitched	84	23.9233	0.116747	9		syp2het	male	0
DLW211het	2022_02_25_DLW211het_488ollascosa1_555rad51_male2_stitched	79	24.3461	0.11881	8		syp2het	male	1
DLW211het	2022_02_25_DLW211het_488ollascosa1_555rad51_male2_stitched	50	25.5737	0.124801	9		syp2het	male	0
DLW211het	2022_02_25_DLW211het_488ollascosa1_555rad51_male2_stitched	51	26.7068	0.13033	12		syp2het	male	1
DLW211het	2022_02_25_DLW211het_488ollascosa1_555rad51_male2_stitched	41	27.7979	0.135655	12		syp2het	male	1
DLW211het	2022_02_25_DLW211het_488ollascosa1_555rad51_male2_stitched	34	28.3615	0.138405	13		syp2het	male	0
DLW211het	2022_02_25_DLW211het_488ollascosa1_555rad51_male2_stitched	81	29.1375	0.142192	10		syp2het	male	2
DLW211het	2022_02_25_DLW211het_488ollascosa1_555rad51_male2_stitched	70	29.6443	0.144665	8		syp2het	male	0
DLW211het	2022_02_25_DLW211het_488ollascosa1_555rad51_male2_stitched	44	31.2593	0.152547	11		syp2het	male	0
DLW211het	2022_02_25_DLW211het_488ollascosa1_555rad51_male2_stitched	49	31.7883	0.155128	5		syp2het	male	0
DLW211het	2022_02_25_DLW211het_488ollascosa1_555rad51_male2_stitched	33	32.795	0.160041	17		syp2het	male	2
DLW211het	2022_02_25_DLW211het_488ollascosa1_555rad51_male2_stitched	32	33.0461	0.161266	9		syp2het	male	0
DLW211het	2022_02_25_DLW211het_488ollascosa1_555rad51_male2_stitched	63	33.8486	0.165183	9		syp2het	male	0
DLW211het	2022_02_25_DLW211het_488ollascosa1_555rad51_male2_stitched	64	35.2294	0.171921	11		syp2het	male	1
DLW211het	2022_02_25_DLW211het_488ollascosa1_555rad51_male2_stitched	39	36.5854	0.178538	11		syp2het	male	0
DLW211het	2022_02_25_DLW211het_488ollascosa1_555rad51_male2_stitched	40	36.9976	0.18055	11		syp2het	male	0
DLW211het	2022_02_25_DLW211het_488ollascosa1_555rad51_male2_stitched	52	38.8037	0.189364	9		syp2het	male	0
DLW211het	2022_02_25_DLW211het_488ollascosa1_555rad51_male2_stitched	69	39.0286	0.190462	4		syp2het	male	0
DLW211het	2022_02_25_DLW211het_488ollascosa1_555rad51_male2_stitched	45	40.0154	0.195277	12		syp2het	male	0
DLW211het	2022_02_25_DLW211het_488ollascosa1_555rad51_male2_stitched	25	40.7672	0.198946	8		syp2het	male	0
DLW211het	2022_02_25_DLW211het_488ollascosa1_555rad51_male2_stitched	62	41.6661	0.203332	8		syp2het	male	0
DLW211het	2022_02_25_DLW211het_488ollascosa1_555rad51_male2_stitched	61	43.4375	0.211977	7		syp2het	male	1
DLW211het	2022_02_25_DLW211het_488ollascosa1_555rad51_male2_stitched	22	43.4973	0.212269	9		syp2het	male	2
DLW211het	2022_02_25_DLW211het_488ollascosa1_555rad51_male2_stitched	28	43.5245	0.212402	6		syp2het	male	0
DLW211het	2022_02_25_DLW211het_488ollascosa1_555rad51_male2_stitched	31	45.2148	0.22065	10		syp2het	male	0
DLW211het	2022_02_25_DLW211het_488ollascosa1_555rad51_male2_stitched	42	46.4853	0.226851	6		syp2het	male	0
DLW211het	2022_02_25_DLW211het_488ollascosa1_555rad51_male2_stitched	54	47.9258	0.23388	8		syp2het	male	0
DLW211het	2022_02_25_DLW211het_488ollascosa1_555rad51_male2_stitched	30	48.443	0.236404	7		syp2het	male	0
DLW211het	2022_02_25_DLW211het_488ollascosa1_555rad51_male2_stitched	15	49.5303	0.24171	14		syp2het	male	2
DLW211het	2022_02_25_DLW211het_488ollascosa1_555rad51_male2_stitched	20	51.2401	0.250054	7		syp2het	male	1
DLW211het	2022_02_25_DLW211het_488ollascosa1_555rad51_male2_stitched	23	51.7864	0.25272	8		syp2het	male	0
DLW211het	2022_02_25_DLW211het_488ollascosa1_555rad51_male2_stitched	48	52.1641	0.254563	3		syp2het	male	0
DLW211het	2022_02_25_DLW211het_488ollascosa1_555rad51_male2_stitched	38	52.8686	0.258001	4		syp2het	male	0
DLW211het	2022_02_25_DLW211het_488ollascosa1_555rad51_male2_stitched	29	53.8933	0.263002	9		syp2het	male	0
DLW211het	2022_02_25_DLW211het_488ollascosa1_555rad51_male2_stitched	7	56.145	0.27399	7		syp2het	male	2
DLW211het	2022_02_25_DLW211het_488ollascosa1_555rad51_male2_stitched	3	57.2859	0.279558	5		syp2het	male	0
DLW211het	2022_02_25_DLW211het_488ollascosa1_555rad51_male2_stitched	36	57.3355	0.2798	8		syp2het	male	0
DLW211het	2022_02_25_DLW211het_488ollascosa1_555rad51_male2_stitched	16	57.6629	0.281398	3		syp2het	male	0
DLW211het	2022_02_25_DLW211het_488ollascosa1_555rad51_male2_stitched	24	60.3616	0.294568	4		syp2het	male	0
DLW211het	2022_02_25_DLW211het_488ollascosa1_555rad51_male2_stitched	35	61.3516	0.299399	0		syp2het	male	0
DLW211het	2022_02_25_DLW211het_488ollascosa1_555rad51_male2_stitched	9	61.7209	0.301201	0		syp2het	male	0
DLW211het	2022_02_25_DLW211het_488ollascosa1_555rad51_male2_stitched	27	64.1149	0.312884	2		syp2het	male	0
DLW211het	2022_02_25_DLW211het_488ollascosa1_555rad51_male2_stitched	8	65.5069	0.319677	5		syp2het	male	0
DLW211het	2022_02_25_DLW211het_488ollascosa1_555rad51_male2_stitched	13	69.2151	0.337773	3		syp2het	male	0
DLW211het	2022_02_25_DLW211het_488ollascosa1_555rad51_male2_stitched	14	69.2313	0.337852	2		syp2het	male	0
DLW211het	2022_02_25_DLW211het_488ollascosa1_555rad51_male2_stitched	5	69.7867	0.340562	1		syp2het	male	0
DLW211het	2022_02_25_DLW211het_488ollascosa1_555rad51_male2_stitched	26	71.6377	0.349595	5		syp2het	male	0
DLW211het	2022_02_25_DLW211het_488ollascosa1_555rad51_male2_stitched	12	72.4059	0.353344	5		syp2het	male	0
DLW211het	2022_02_25_DLW211het_488ollascosa1_555rad51_male2_stitched	10	72.4729	0.353671	8		syp2het	male	0
DLW211het	2022_02_25_DLW211het_488ollascosa1_555rad51_male2_stitched	19	73.9036	0.360653	4		syp2het	male	0
DLW211het	2022_02_25_DLW211het_488ollascosa1_555rad51_male2_stitched	172	74.93	0.365662	2		syp2het	male	0
DLW211het	2022_02_25_DLW211het_488ollascosa1_555rad51_male2_stitched	165	76.9286	0.375415	8		syp2het	male	0
DLW211het	2022_02_25_DLW211het_488ollascosa1_555rad51_male2_stitched	184	77.1479	0.376485	3		syp2het	male	2
DLW211het	2022_02_25_DLW211het_488ollascosa1_555rad51_male2_stitched	181	78.549	0.383323	5		syp2het	male	0
DLW211het	2022_02_25_DLW211het_488ollascosa1_555rad51_male2_stitched	177	79.2382	0.386686	7		syp2het	male	0
DLW211het	2022_02_25_DLW211het_488ollascosa1_555rad51_male2_stitched	174	80.2523	0.391635	5		syp2het	male	0
DLW211het	2022_02_25_DLW211het_488ollascosa1_555rad51_male2_stitched	186	81.9161	0.399754	5		syp2het	male	1
DLW211het	2022_02_25_DLW211het_488ollascosa1_555rad51_male2_stitched	185	83.0126	0.405105	3		syp2het	male	0
DLW211het	2022_02_25_DLW211het_488ollascosa1_555rad51_male2_stitched	154	84.247	0.411129	6		syp2het	male	0
DLW211het	2022_02_25_DLW211het_488ollascosa1_555rad51_male2_stitched	180	84.3302	0.411535	3		syp2het	male	0
DLW211het	2022_02_25_DLW211het_488ollascosa1_555rad51_male2_stitched	179	84.9832	0.414722	6		syp2het	male	0
DLW211het	2022_02_25_DLW211het_488ollascosa1_555rad51_male2_stitched	163	86.5853	0.42254	7		syp2het	male	1
DLW211het	2022_02_25_DLW211het_488ollascosa1_555rad51_male2_stitched	187	86.7346	0.423269	1		syp2het	male	0
DLW211het	2022_02_25_DLW211het_488ollascosa1_555rad51_male2_stitched	175	89.3414	0.43599	3		syp2het	male	0
DLW211het	2022_02_25_DLW211het_488ollascosa1_555rad51_male2_stitched	182	90.3152	0.440742	5		syp2het	male	0
DLW211het	2022_02_25_DLW211het_488ollascosa1_555rad51_male2_stitched	148	90.9275	0.443731	8		syp2het	male	0
DLW211het	2022_02_25_DLW211het_488ollascosa1_555rad51_male2_stitched	164	91.439	0.446226	4		syp2het	male	0
DLW211het	2022_02_25_DLW211het_488ollascosa1_555rad51_male2_stitched	183	92.8073	0.452904	5		syp2het	male	0
DLW211het	2022_02_25_DLW211het_488ollascosa1_555rad51_male2_stitched	151	95.0007	0.463608	3		syp2het	male	0
DLW211het	2022_02_25_DLW211het_488ollascosa1_555rad51_male2_stitched	176	95.5132	0.466109	7		syp2het	male	0
DLW211het	2022_02_25_DLW211het_488ollascosa1_555rad51_male2_stitched	170	96.8017	0.472397	8		syp2het	male	0
DLW211het	2022_02_25_DLW211het_488ollascosa1_555rad51_male2_stitched	137	98.7481	0.481895	3		syp2het	male	0
DLW211het	2022_02_25_DLW211het_488ollascosa1_555rad51_male2_stitched	153	99.7925	0.486992	8		syp2het	male	0
DLW211het	2022_02_25_DLW211het_488ollascosa1_555rad51_male2_stitched	152	100.257	0.489256	5		syp2het	male	0
DLW211het	2022_02_25_DLW211het_488ollascosa1_555rad51_male2_stitched	173	102.202	0.498749	5		syp2het	male	0
DLW211het	2022_02_25_DLW211het_488ollascosa1_555rad51_male2_stitched	159	105.462	0.514657	3		syp2het	male	2
DLW211het	2022_02_25_DLW211het_488ollascosa1_555rad51_male2_stitched	138	105.704	0.515842	5		syp2het	male	3
DLW211het	2022_02_25_DLW211het_488ollascosa1_555rad51_male2_stitched	156	107.691	0.525539	1		syp2het	male	1
DLW211het	2022_02_25_DLW211het_488ollascosa1_555rad51_male2_stitched	169	109.664	0.535166	5		syp2het	male	1
DLW211het	2022_02_25_DLW211het_488ollascosa1_555rad51_male2_stitched	127	111.017	0.54177	4		syp2het	male	1
DLW211het	2022_02_25_DLW211het_488ollascosa1_555rad51_male2_stitched	178	113.552	0.554139	2		syp2het	male	2
DLW211het	2022_02_25_DLW211het_488ollascosa1_555rad51_male2_stitched	130	114.717	0.559823	2		syp2het	male	4
DLW211het	2022_02_25_DLW211het_488ollascosa1_555rad51_male2_stitched	143	114.95	0.560959	5		syp2het	male	0
DLW211het	2022_02_25_DLW211het_488ollascosa1_555rad51_male2_stitched	125	118.84	0.579945	0		syp2het	male	4
DLW211het	2022_02_25_DLW211het_488ollascosa1_555rad51_male2_stitched	167	119.957	0.585398	1		syp2het	male	6
DLW211het	2022_02_25_DLW211het_488ollascosa1_555rad51_male2_stitched	171	121.161	0.591273	1		syp2het	male	3
DLW211het	2022_02_25_DLW211het_488ollascosa1_555rad51_male2_stitched	122	121.95	0.595123	0		syp2het	male	3
DLW211het	2022_02_25_DLW211het_488ollascosa1_555rad51_male2_stitched	140	122.6	0.598293	1		syp2het	male	6
DLW211het	2022_02_25_DLW211het_488ollascosa1_555rad51_male2_stitched	136	123.406	0.602227	1		syp2het	male	4
DLW211het	2022_02_25_DLW211het_488ollascosa1_555rad51_male2_stitched	121	124.858	0.609315	1		syp2het	male	5
DLW211het	2022_02_25_DLW211het_488ollascosa1_555rad51_male2_stitched	162	126.043	0.615096	2		syp2het	male	5
DLW211het	2022_02_25_DLW211het_488ollascosa1_555rad51_male2_stitched	124	127.906	0.624187	1		syp2het	male	4
DLW211het	2022_02_25_DLW211het_488ollascosa1_555rad51_male2_stitched	166	129.417	0.631563	1		syp2het	male	6
DLW211het	2022_02_25_DLW211het_488ollascosa1_555rad51_male2_stitched	132	130.5	0.636848	2		syp2het	male	5
DLW211het	2022_02_25_DLW211het_488ollascosa1_555rad51_male2_stitched	115	133.382	0.650911	1		syp2het	male	5
DLW211het	2022_02_25_DLW211het_488ollascosa1_555rad51_male2_stitched	131	133.995	0.653904	0		syp2het	male	5
DLW211het	2022_02_25_DLW211het_488ollascosa1_555rad51_male2_stitched	149	134.174	0.654774	0		syp2het	male	8
DLW211het	2022_02_25_DLW211het_488ollascosa1_555rad51_male2_stitched	142	136.37	0.665493	0		syp2het	male	5
DLW211het	2022_02_25_DLW211het_488ollascosa1_555rad51_male2_stitched	112	137.494	0.670975	1		syp2het	male	4
DLW211het	2022_02_25_DLW211het_488ollascosa1_555rad51_male2_stitched	168	138.199	0.674416	2		syp2het	male	5
DLW211het	2022_02_25_DLW211het_488ollascosa1_555rad51_male2_stitched	120	142.993	0.697811	3		syp2het	male	5
DLW211het	2022_02_25_DLW211het_488ollascosa1_555rad51_male2_stitched	139	145.003	0.707623	0		syp2het	male	6
DLW211het	2022_02_25_DLW211het_488ollascosa1_555rad51_male2_stitched	160	145.711	0.711074	1		syp2het	male	5
DLW211het	2022_02_25_DLW211het_488ollascosa1_555rad51_male2_stitched	128	146.481	0.714835	0		syp2het	male	6
DLW211het	2022_02_25_DLW211het_488ollascosa1_555rad51_male2_stitched	91	150.684	0.735347	0		syp2het	male	4
DLW211het	2022_02_25_DLW211het_488ollascosa1_555rad51_male2_stitched	113	152.748	0.745418	1		syp2het	male	4
DLW211het	2022_02_25_DLW211het_488ollascosa1_555rad51_male2_stitched	158	152.922	0.746269	0		syp2het	male	6
DLW211het	2022_02_25_DLW211het_488ollascosa1_555rad51_male2_stitched	133	154.106	0.752044	1		syp2het	male	7
DLW211het	2022_02_25_DLW211het_488ollascosa1_555rad51_male2_stitched	126	154.223	0.752613	2		syp2het	male	4
DLW211het	2022_02_25_DLW211het_488ollascosa1_555rad51_male2_stitched	161	154.847	0.75566	0		syp2het	male	5
DLW211het	2022_02_25_DLW211het_488ollascosa1_555rad51_male2_stitched	111	155.942	0.761002	0		syp2het	male	5
DLW211het	2022_02_25_DLW211het_488ollascosa1_555rad51_male2_stitched	101	156.918	0.765766	1		syp2het	male	5
DLW211het	2022_02_25_DLW211het_488ollascosa1_555rad51_male2_stitched	94	156.921	0.765781	2		syp2het	male	5
DLW211het	2022_02_25_DLW211het_488ollascosa1_555rad51_male2_stitched	105	157.33	0.767778	1		syp2het	male	6
DLW211het	2022_02_25_DLW211het_488ollascosa1_555rad51_male2_stitched	123	161.291	0.787105	0		syp2het	male	5
DLW211het	2022_02_25_DLW211het_488ollascosa1_555rad51_male2_stitched	146	162.615	0.793569	0		syp2het	male	4
DLW211het	2022_02_25_DLW211het_488ollascosa1_555rad51_male2_stitched	98	163.033	0.795608	1		syp2het	male	5
DLW211het	2022_02_25_DLW211het_488ollascosa1_555rad51_male2_stitched	155	163.865	0.799668	0		syp2het	male	5
DLW211het	2022_02_25_DLW211het_488ollascosa1_555rad51_male2_stitched	103	164.513	0.802833	3		syp2het	male	5
DLW211het	2022_02_25_DLW211het_488ollascosa1_555rad51_male2_stitched	119	165.409	0.807206	0		syp2het	male	5
DLW211het	2022_02_25_DLW211het_488ollascosa1_555rad51_male2_stitched	109	166.807	0.814025	0		syp2het	male	6
DLW211het	2022_02_25_DLW211het_488ollascosa1_555rad51_male2_stitched	107	167.119	0.815547	1		syp2het	male	5
DLW211het	2022_02_25_DLW211het_488ollascosa1_555rad51_male2_stitched	102	170.032	0.829764	4		syp2het	male	5
DLW211het	2022_02_25_DLW211het_488ollascosa1_555rad51_male2_stitched	145	170.715	0.833097	0		syp2het	male	5
DLW211het	2022_02_25_DLW211het_488ollascosa1_555rad51_male2_stitched	92	170.885	0.833927	0		syp2het	male	5
DLW211het	2022_02_25_DLW211het_488ollascosa1_555rad51_male2_stitched	116	172.664	0.842607	0		syp2het	male	6
DLW211het	2022_02_25_DLW211het_488ollascosa1_555rad51_male2_stitched	106	174.067	0.849453	2		syp2het	male	5
DLW211het	2022_02_25_DLW211het_488ollascosa1_555rad51_male2_stitched	108	174.894	0.853489	0		syp2het	male	5
DLW211het	2022_02_25_DLW211het_488ollascosa1_555rad51_male2_stitched	99	175.26	0.855278	0		syp2het	male	5
DLW211het	2022_02_25_DLW211het_488ollascosa1_555rad51_male2_stitched	129	175.834	0.858079	1		syp2het	male	5
DLW211het	2022_02_25_DLW211het_488ollascosa1_555rad51_male2_stitched	144	177.629	0.86684	0		syp2het	male	5
DLW211het	2022_02_25_DLW211het_488ollascosa1_555rad51_male2_stitched	88	177.67	0.867037	0		syp2het	male	5
DLW211het	2022_02_25_DLW211het_488ollascosa1_555rad51_male2_stitched	93	179.105	0.87404	0		syp2het	male	6
DLW211het	2022_02_25_DLW211het_488ollascosa1_555rad51_male2_stitched	100	180.702	0.881835	0		syp2het	male	4
DLW211het	2022_02_25_DLW211het_488ollascosa1_555rad51_male2_stitched	134	182.961	0.892858	0		syp2het	male	5
DLW211het	2022_02_25_DLW211het_488ollascosa1_555rad51_male2_stitched	114	184.186	0.898835	0		syp2het	male	5
DLW211het	2022_02_25_DLW211het_488ollascosa1_555rad51_male2_stitched	141	185.632	0.905892	1		syp2het	male	5
DLW211het	2022_02_25_DLW211het_488ollascosa1_555rad51_male2_stitched	97	186.569	0.910466	0		syp2het	male	5
DLW211het	2022_02_25_DLW211het_488ollascosa1_555rad51_male2_stitched	104	187.846	0.916699	1		syp2het	male	6
DLW211het	2022_02_25_DLW211het_488ollascosa1_555rad51_male2_stitched	118	188.621	0.92048	0		syp2het	male	6
DLW211het	2022_02_25_DLW211het_488ollascosa1_555rad51_male2_stitched	90	191.065	0.932404	0		syp2het	male	5
DLW211het	2022_02_25_DLW211het_488ollascosa1_555rad51_male2_stitched	95	192.153	0.937715	0		syp2het	male	5
DLW211het	2022_02_25_DLW211het_488ollascosa1_555rad51_male2_stitched	135	192.799	0.94087	0		syp2het	male	5
DLW211het	2022_02_25_DLW211het_488ollascosa1_555rad51_male2_stitched	117	194.121	0.947319	0		syp2het	male	4
DLW211het	2022_02_25_DLW211het_488ollascosa1_555rad51_male2_stitched	110	197.425	0.963445	0		syp2het	male	5
DLW211het	2022_02_25_DLW211het_488ollascosa1_555rad51_male2_stitched	96	199.285	0.972518	0		syp2het	male	5
DLW211het	2022_02_25_DLW211het_488ollascosa1_555rad51_male2_stitched	89	204.916	1	1		syp2het	male	5
DLW212het	2022_02_25_DLW212het_488ollascosa1_555rad51_male1_stitched	46	2.27334	0.0160612	16		syp3het	male	0
DLW212het	2022_02_25_DLW212het_488ollascosa1_555rad51_male1_stitched	47	5.57251	0.03937	14		syp3het	male	0
DLW212het	2022_02_25_DLW212het_488ollascosa1_555rad51_male1_stitched	39	8.08986	0.0571551	13		syp3het	male	0
DLW212het	2022_02_25_DLW212het_488ollascosa1_555rad51_male1_stitched	45	9.38785	0.0663255	9		syp3het	male	0
DLW212het	2022_02_25_DLW212het_488ollascosa1_555rad51_male1_stitched	44	9.63296	0.0680572	5		syp3het	male	0
DLW212het	2022_02_25_DLW212het_488ollascosa1_555rad51_male1_stitched	40	10.365	0.0732294	16		syp3het	male	0
DLW212het	2022_02_25_DLW212het_488ollascosa1_555rad51_male1_stitched	43	11.7036	0.0826866	10		syp3het	male	0
DLW212het	2022_02_25_DLW212het_488ollascosa1_555rad51_male1_stitched	36	13.0155	0.0919553	12		syp3het	male	0
DLW212het	2022_02_25_DLW212het_488ollascosa1_555rad51_male1_stitched	41	13.4383	0.094942	7		syp3het	male	0
DLW212het	2022_02_25_DLW212het_488ollascosa1_555rad51_male1_stitched	42	13.8611	0.0979292	6		syp3het	male	0
DLW212het	2022_02_25_DLW212het_488ollascosa1_555rad51_male1_stitched	33	16.3815	0.115736	13		syp3het	male	0
DLW212het	2022_02_25_DLW212het_488ollascosa1_555rad51_male1_stitched	38	16.4787	0.116423	13		syp3het	male	0
DLW212het	2022_02_25_DLW212het_488ollascosa1_555rad51_male1_stitched	37	18.4189	0.13013	5		syp3het	male	0
DLW212het	2022_02_25_DLW212het_488ollascosa1_555rad51_male1_stitched	34	19.5144	0.13787	8		syp3het	male	0
DLW212het	2022_02_25_DLW212het_488ollascosa1_555rad51_male1_stitched	29	20.8419	0.147249	4		syp3het	male	0
DLW212het	2022_02_25_DLW212het_488ollascosa1_555rad51_male1_stitched	35	21.623	0.152767	11		syp3het	male	0
DLW212het	2022_02_25_DLW212het_488ollascosa1_555rad51_male1_stitched	31	24.1947	0.170937	8		syp3het	male	0
DLW212het	2022_02_25_DLW212het_488ollascosa1_555rad51_male1_stitched	32	24.2276	0.171169	8		syp3het	male	0
DLW212het	2022_02_25_DLW212het_488ollascosa1_555rad51_male1_stitched	25	25.5587	0.180573	9		syp3het	male	0
DLW212het	2022_02_25_DLW212het_488ollascosa1_555rad51_male1_stitched	27	25.6539	0.181246	5		syp3het	male	0
DLW212het	2022_02_25_DLW212het_488ollascosa1_555rad51_male1_stitched	30	27.2387	0.192442	6		syp3het	male	0
DLW212het	2022_02_25_DLW212het_488ollascosa1_555rad51_male1_stitched	26	29.6804	0.209693	10		syp3het	male	0
DLW212het	2022_02_25_DLW212het_488ollascosa1_555rad51_male1_stitched	23	30.2965	0.214046	5		syp3het	male	0
DLW212het	2022_02_25_DLW212het_488ollascosa1_555rad51_male1_stitched	28	30.9802	0.218877	6		syp3het	male	0
DLW212het	2022_02_25_DLW212het_488ollascosa1_555rad51_male1_stitched	22	32.8327	0.231964	9		syp3het	male	0
DLW212het	2022_02_25_DLW212het_488ollascosa1_555rad51_male1_stitched	24	34.037	0.240472	3		syp3het	male	0
DLW212het	2022_02_25_DLW212het_488ollascosa1_555rad51_male1_stitched	21	35.5593	0.251228	3		syp3het	male	0
DLW212het	2022_02_25_DLW212het_488ollascosa1_555rad51_male1_stitched	19	38.1057	0.269218	3		syp3het	male	0
DLW212het	2022_02_25_DLW212het_488ollascosa1_555rad51_male1_stitched	16	39.8294	0.281396	0		syp3het	male	0
DLW212het	2022_02_25_DLW212het_488ollascosa1_555rad51_male1_stitched	15	40.1654	0.28377	6		syp3het	male	0
DLW212het	2022_02_25_DLW212het_488ollascosa1_555rad51_male1_stitched	20	44.1898	0.312203	10		syp3het	male	0
DLW212het	2022_02_25_DLW212het_488ollascosa1_555rad51_male1_stitched	17	45.7859	0.323479	3		syp3het	male	1
DLW212het	2022_02_25_DLW212het_488ollascosa1_555rad51_male1_stitched	18	48.9495	0.34583	3		syp3het	male	0
DLW212het	2022_02_25_DLW212het_488ollascosa1_555rad51_male1_stitched	13	49.1659	0.347359	2		syp3het	male	0
DLW212het	2022_02_25_DLW212het_488ollascosa1_555rad51_male1_stitched	14	50.8002	0.358905	7		syp3het	male	2
DLW212het	2022_02_25_DLW212het_488ollascosa1_555rad51_male1_stitched	11	51.2607	0.362159	4		syp3het	male	0
DLW212het	2022_02_25_DLW212het_488ollascosa1_555rad51_male1_stitched	10	54.066	0.381978	4		syp3het	male	0
DLW212het	2022_02_25_DLW212het_488ollascosa1_555rad51_male1_stitched	12	58.024	0.409942	7		syp3het	male	2
DLW212het	2022_02_25_DLW212het_488ollascosa1_555rad51_male1_stitched	7	61.5648	0.434957	7		syp3het	male	2
DLW212het	2022_02_25_DLW212het_488ollascosa1_555rad51_male1_stitched	8	63.7762	0.450581	8		syp3het	male	5
DLW212het	2022_02_25_DLW212het_488ollascosa1_555rad51_male1_stitched	9	67.4541	0.476566	4		syp3het	male	5
DLW212het	2022_02_25_DLW212het_488ollascosa1_555rad51_male1_stitched	3	68.1583	0.481541	4		syp3het	male	3
DLW212het	2022_02_25_DLW212het_488ollascosa1_555rad51_male1_stitched	2	71.0138	0.501715	3		syp3het	male	5
DLW212het	2022_02_25_DLW212het_488ollascosa1_555rad51_male1_stitched	4	73.7967	0.521377	6		syp3het	male	5
DLW212het	2022_02_25_DLW212het_488ollascosa1_555rad51_male1_stitched	6	74.3632	0.525378	3		syp3het	male	5
DLW212het	2022_02_25_DLW212het_488ollascosa1_555rad51_male1_stitched	1	76.1399	0.537931	1		syp3het	male	5
DLW212het	2022_02_25_DLW212het_488ollascosa1_555rad51_male1_stitched	92	82.1309	0.580258	1		syp3het	male	6
DLW212het	2022_02_25_DLW212het_488ollascosa1_555rad51_male1_stitched	96	83.9533	0.593133	4		syp3het	male	6
DLW212het	2022_02_25_DLW212het_488ollascosa1_555rad51_male1_stitched	89	83.9736	0.593276	0		syp3het	male	4
DLW212het	2022_02_25_DLW212het_488ollascosa1_555rad51_male1_stitched	94	86.0171	0.607714	3		syp3het	male	6
DLW212het	2022_02_25_DLW212het_488ollascosa1_555rad51_male1_stitched	84	89.0129	0.62888	2		syp3het	male	5
DLW212het	2022_02_25_DLW212het_488ollascosa1_555rad51_male1_stitched	95	89.4276	0.631809	1		syp3het	male	6
DLW212het	2022_02_25_DLW212het_488ollascosa1_555rad51_male1_stitched	88	91.049	0.643264	1		syp3het	male	5
DLW212het	2022_02_25_DLW212het_488ollascosa1_555rad51_male1_stitched	93	92.5552	0.653906	2		syp3het	male	6
DLW212het	2022_02_25_DLW212het_488ollascosa1_555rad51_male1_stitched	87	93.4463	0.660201	2		syp3het	male	5
DLW212het	2022_02_25_DLW212het_488ollascosa1_555rad51_male1_stitched	80	94.7389	0.669333	0		syp3het	male	5
DLW212het	2022_02_25_DLW212het_488ollascosa1_555rad51_male1_stitched	90	95.9627	0.67798	0		syp3het	male	5
DLW212het	2022_02_25_DLW212het_488ollascosa1_555rad51_male1_stitched	91	96.8667	0.684366	0		syp3het	male	6
DLW212het	2022_02_25_DLW212het_488ollascosa1_555rad51_male1_stitched	82	98.1316	0.693303	2		syp3het	male	6
DLW212het	2022_02_25_DLW212het_488ollascosa1_555rad51_male1_stitched	77	102.576	0.7247	0		syp3het	male	5
DLW212het	2022_02_25_DLW212het_488ollascosa1_555rad51_male1_stitched	79	102.964	0.727448	0		syp3het	male	5
DLW212het	2022_02_25_DLW212het_488ollascosa1_555rad51_male1_stitched	86	103.857	0.733753	1		syp3het	male	5
DLW212het	2022_02_25_DLW212het_488ollascosa1_555rad51_male1_stitched	81	109.555	0.774012	1		syp3het	male	5
DLW212het	2022_02_25_DLW212het_488ollascosa1_555rad51_male1_stitched	74	109.829	0.775948	0		syp3het	male	5
DLW212het	2022_02_25_DLW212het_488ollascosa1_555rad51_male1_stitched	78	111.913	0.790671	2		syp3het	male	5
DLW212het	2022_02_25_DLW212het_488ollascosa1_555rad51_male1_stitched	85	112.179	0.792551	1		syp3het	male	5
DLW212het	2022_02_25_DLW212het_488ollascosa1_555rad51_male1_stitched	71	113.211	0.799837	0		syp3het	male	5
DLW212het	2022_02_25_DLW212het_488ollascosa1_555rad51_male1_stitched	83	114.135	0.806366	0		syp3het	male	5
DLW212het	2022_02_25_DLW212het_488ollascosa1_555rad51_male1_stitched	70	117.906	0.83301	0		syp3het	male	6
DLW212het	2022_02_25_DLW212het_488ollascosa1_555rad51_male1_stitched	73	118.453	0.836875	0		syp3het	male	5
DLW212het	2022_02_25_DLW212het_488ollascosa1_555rad51_male1_stitched	75	121.47	0.858191	1		syp3het	male	5
DLW212het	2022_02_25_DLW212het_488ollascosa1_555rad51_male1_stitched	76	122.057	0.862334	2		syp3het	male	5
DLW212het	2022_02_25_DLW212het_488ollascosa1_555rad51_male1_stitched	64	123.521	0.872681	2		syp3het	male	5
DLW212het	2022_02_25_DLW212het_488ollascosa1_555rad51_male1_stitched	68	124.617	0.880424	3		syp3het	male	6
DLW212het	2022_02_25_DLW212het_488ollascosa1_555rad51_male1_stitched	72	127.461	0.900517	3		syp3het	male	7
DLW212het	2022_02_25_DLW212het_488ollascosa1_555rad51_male1_stitched	59	128.228	0.905937	0		syp3het	male	5
DLW212het	2022_02_25_DLW212het_488ollascosa1_555rad51_male1_stitched	67	128.672	0.909073	0		syp3het	male	5
DLW212het	2022_02_25_DLW212het_488ollascosa1_555rad51_male1_stitched	66	130.618	0.92282	0		syp3het	male	5
DLW212het	2022_02_25_DLW212het_488ollascosa1_555rad51_male1_stitched	69	133.8	0.945302	2		syp3het	male	5
DLW212het	2022_02_25_DLW212het_488ollascosa1_555rad51_male1_stitched	60	133.93	0.946218	0		syp3het	male	5
DLW212het	2022_02_25_DLW212het_488ollascosa1_555rad51_male1_stitched	58	133.935	0.946257	0		syp3het	male	5
DLW212het	2022_02_25_DLW212het_488ollascosa1_555rad51_male1_stitched	62	137.248	0.969659	0		syp3het	male	5
DLW212het	2022_02_25_DLW212het_488ollascosa1_555rad51_male1_stitched	52	138.098	0.97567	0		syp3het	male	5
DLW212het	2022_02_25_DLW212het_488ollascosa1_555rad51_male1_stitched	65	138.479	0.978356	1		syp3het	male	5
DLW212het	2022_02_25_DLW212het_488ollascosa1_555rad51_male1_stitched	61	139.846	0.988017	0		syp3het	male	5
DLW212het	2022_02_25_DLW212het_488ollascosa1_555rad51_male4_stitched	84	0.166232	0.000673222	7		syp3het	male	0
DLW212het	2022_02_25_DLW212het_488ollascosa1_555rad51_male4_stitched	87	0.304057	0.0012314	2		syp3het	male	0
DLW212het	2022_02_25_DLW212het_488ollascosa1_555rad51_male4_stitched	4	1.53713	0.0062252	19		syp3het	male	0
DLW212het	2022_02_25_DLW212het_488ollascosa1_555rad51_male4_stitched	6	1.80293	0.00730168	11		syp3het	male	0
DLW212het	2022_02_25_DLW212het_488ollascosa1_555rad51_male4_stitched	3	5.61384	0.0227354	16		syp3het	male	0
DLW212het	2022_02_25_DLW212het_488ollascosa1_555rad51_male4_stitched	5	7.65829	0.0310152	13		syp3het	male	0
DLW212het	2022_02_25_DLW212het_488ollascosa1_555rad51_male4_stitched	1	8.43608	0.0341652	19		syp3het	male	0
DLW212het	2022_02_25_DLW212het_488ollascosa1_555rad51_male4_stitched	68	10.4715	0.0424084	1		syp3het	male	0
DLW212het	2022_02_25_DLW212het_488ollascosa1_555rad51_male4_stitched	2	11.6593	0.0472188	8		syp3het	male	0
DLW212het	2022_02_25_DLW212het_488ollascosa1_555rad51_male4_stitched	9	12.1295	0.0491229	11		syp3het	male	0
DLW212het	2022_02_25_DLW212het_488ollascosa1_555rad51_male4_stitched	10	13.8215	0.0559756	15		syp3het	male	0
DLW212het	2022_02_25_DLW212het_488ollascosa1_555rad51_male4_stitched	7	17.8452	0.0722709	15		syp3het	male	0
DLW212het	2022_02_25_DLW212het_488ollascosa1_555rad51_male4_stitched	14	18.0216	0.0729853	18		syp3het	male	0
DLW212het	2022_02_25_DLW212het_488ollascosa1_555rad51_male4_stitched	13	18.6641	0.0755875	19		syp3het	male	0
DLW212het	2022_02_25_DLW212het_488ollascosa1_555rad51_male4_stitched	14	19.0676	0.0772216	18		syp3het	male	0
DLW212het	2022_02_25_DLW212het_488ollascosa1_555rad51_male4_stitched	15	20.3524	0.0824249	12		syp3het	male	0
DLW212het	2022_02_25_DLW212het_488ollascosa1_555rad51_male4_stitched	82	22.0459	0.0892833	1		syp3het	male	0
DLW212het	2022_02_25_DLW212het_488ollascosa1_555rad51_male4_stitched	11	22.642	0.0916976	14		syp3het	male	0
DLW212het	2022_02_25_DLW212het_488ollascosa1_555rad51_male4_stitched	12	23.6187	0.095653	12		syp3het	male	0
DLW212het	2022_02_25_DLW212het_488ollascosa1_555rad51_male4_stitched	24	24.782	0.100364	11		syp3het	male	0
DLW212het	2022_02_25_DLW212het_488ollascosa1_555rad51_male4_stitched	30	26.5809	0.10765	13		syp3het	male	0
DLW212het	2022_02_25_DLW212het_488ollascosa1_555rad51_male4_stitched	25	26.5809	0.10765	10		syp3het	male	0
DLW212het	2022_02_25_DLW212het_488ollascosa1_555rad51_male4_stitched	20	28.1854	0.114148	8		syp3het	male	0
DLW212het	2022_02_25_DLW212het_488ollascosa1_555rad51_male4_stitched	19	30.2653	0.122571	8		syp3het	male	0
DLW212het	2022_02_25_DLW212het_488ollascosa1_555rad51_male4_stitched	17	32.4554	0.131441	10		syp3het	male	0
DLW212het	2022_02_25_DLW212het_488ollascosa1_555rad51_male4_stitched	36	33.1142	0.134109	13		syp3het	male	0
DLW212het	2022_02_25_DLW212het_488ollascosa1_555rad51_male4_stitched	40	34.5505	0.139926	11		syp3het	male	0
DLW212het	2022_02_25_DLW212het_488ollascosa1_555rad51_male4_stitched	57	35.6951	0.144561	10		syp3het	male	0
DLW212het	2022_02_25_DLW212het_488ollascosa1_555rad51_male4_stitched	27	37.7237	0.152777	5		syp3het	male	0
DLW212het	2022_02_25_DLW212het_488ollascosa1_555rad51_male4_stitched	23	38.2364	0.154853	7		syp3het	male	0
DLW212het	2022_02_25_DLW212het_488ollascosa1_555rad51_male4_stitched	57	40.3548	0.163432	10		syp3het	male	0
DLW212het	2022_02_25_DLW212het_488ollascosa1_555rad51_male4_stitched	41	41.8854	0.169631	4		syp3het	male	0
DLW212het	2022_02_25_DLW212het_488ollascosa1_555rad51_male4_stitched	58	43.7633	0.177236	16		syp3het	male	0
DLW212het	2022_02_25_DLW212het_488ollascosa1_555rad51_male4_stitched	58	44.3147	0.17947	16		syp3het	male	0
DLW212het	2022_02_25_DLW212het_488ollascosa1_555rad51_male4_stitched	28	45.5504	0.184474	10		syp3het	male	0
DLW212het	2022_02_25_DLW212het_488ollascosa1_555rad51_male4_stitched	61	47.8416	0.193753	5		syp3het	male	0
DLW212het	2022_02_25_DLW212het_488ollascosa1_555rad51_male4_stitched	37	48.0763	0.194703	5		syp3het	male	0
DLW212het	2022_02_25_DLW212het_488ollascosa1_555rad51_male4_stitched	50	49.6432	0.201049	13		syp3het	male	0
DLW212het	2022_02_25_DLW212het_488ollascosa1_555rad51_male4_stitched	45	50.6436	0.205101	11		syp3het	male	0
DLW212het	2022_02_25_DLW212het_488ollascosa1_555rad51_male4_stitched	32	53.6042	0.217091	8		syp3het	male	0
DLW212het	2022_02_25_DLW212het_488ollascosa1_555rad51_male4_stitched	43	55.9876	0.226743	8		syp3het	male	0
DLW212het	2022_02_25_DLW212het_488ollascosa1_555rad51_male4_stitched	33	56.7608	0.229875	9		syp3het	male	0
DLW212het	2022_02_25_DLW212het_488ollascosa1_555rad51_male4_stitched	26	58.7041	0.237745	5		syp3het	male	0
DLW212het	2022_02_25_DLW212het_488ollascosa1_555rad51_male4_stitched	44	59.0365	0.239091	6		syp3het	male	0
DLW212het	2022_02_25_DLW212het_488ollascosa1_555rad51_male4_stitched	59	61.5282	0.249182	6		syp3het	male	0
DLW212het	2022_02_25_DLW212het_488ollascosa1_555rad51_male4_stitched	34	63.1021	0.255556	11		syp3het	male	1
DLW212het	2022_02_25_DLW212het_488ollascosa1_555rad51_male4_stitched	31	66.0234	0.267387	4		syp3het	male	0
DLW212het	2022_02_25_DLW212het_488ollascosa1_555rad51_male4_stitched	48	66.461	0.26916	8		syp3het	male	0
DLW212het	2022_02_25_DLW212het_488ollascosa1_555rad51_male4_stitched	38	67.9791	0.275308	4		syp3het	male	0
DLW212het	2022_02_25_DLW212het_488ollascosa1_555rad51_male4_stitched	18	70.9772	0.28745	6		syp3het	male	0
DLW212het	2022_02_25_DLW212het_488ollascosa1_555rad51_male4_stitched	51	72.6093	0.294059	6		syp3het	male	0
DLW212het	2022_02_25_DLW212het_488ollascosa1_555rad51_male4_stitched	22	73.5519	0.297877	6		syp3het	male	0
DLW212het	2022_02_25_DLW212het_488ollascosa1_555rad51_male4_stitched	42	74.6034	0.302135	8		syp3het	male	1
DLW212het	2022_02_25_DLW212het_488ollascosa1_555rad51_male4_stitched	42	76.1282	0.308311	8		syp3het	male	1
DLW212het	2022_02_25_DLW212het_488ollascosa1_555rad51_male4_stitched	62	79.8709	0.323468	3		syp3het	male	0
DLW212het	2022_02_25_DLW212het_488ollascosa1_555rad51_male4_stitched	55	81.0912	0.32841	5		syp3het	male	1
DLW212het	2022_02_25_DLW212het_488ollascosa1_555rad51_male4_stitched	52	82.7559	0.335152	2		syp3het	male	0
DLW212het	2022_02_25_DLW212het_488ollascosa1_555rad51_male4_stitched	29	83.1594	0.336786	6		syp3het	male	0
DLW212het	2022_02_25_DLW212het_488ollascosa1_555rad51_male4_stitched	16	85.0706	0.344526	5		syp3het	male	0
DLW212het	2022_02_25_DLW212het_488ollascosa1_555rad51_male4_stitched	64	85.9861	0.348234	3		syp3het	male	0
DLW212het	2022_02_25_DLW212het_488ollascosa1_555rad51_male4_stitched	53	88.9599	0.360277	3		syp3het	male	0
DLW212het	2022_02_25_DLW212het_488ollascosa1_555rad51_male4_stitched	46	90.9022	0.368144	5		syp3het	male	0
DLW212het	2022_02_25_DLW212het_488ollascosa1_555rad51_male4_stitched	21	92.8409	0.375995	0		syp3het	male	0
DLW212het	2022_02_25_DLW212het_488ollascosa1_555rad51_male4_stitched	60	94.3442	0.382083	2		syp3het	male	0
DLW212het	2022_02_25_DLW212het_488ollascosa1_555rad51_male4_stitched	49	97.5553	0.395088	6		syp3het	male	0
DLW212het	2022_02_25_DLW212het_488ollascosa1_555rad51_male4_stitched	39	98.4042	0.398526	3		syp3het	male	0
DLW212het	2022_02_25_DLW212het_488ollascosa1_555rad51_male4_stitched	65	101.094	0.40942	2		syp3het	male	0
DLW212het	2022_02_25_DLW212het_488ollascosa1_555rad51_male4_stitched	54	104.875	0.424732	4		syp3het	male	0
DLW212het	2022_02_25_DLW212het_488ollascosa1_555rad51_male4_stitched	71	106.257	0.430329	1		syp3het	male	0
DLW212het	2022_02_25_DLW212het_488ollascosa1_555rad51_male4_stitched	63	106.709	0.43216	6		syp3het	male	1
DLW212het	2022_02_25_DLW212het_488ollascosa1_555rad51_male4_stitched	66	108.712	0.440272	11		syp3het	male	2
DLW212het	2022_02_25_DLW212het_488ollascosa1_555rad51_male4_stitched	110	116.193	0.470567	3		syp3het	male	0
DLW212het	2022_02_25_DLW212het_488ollascosa1_555rad51_male4_stitched	101	116.921	0.473515	7		syp3het	male	2
DLW212het	2022_02_25_DLW212het_488ollascosa1_555rad51_male4_stitched	92	116.989	0.473791	4		syp3het	male	5
DLW212het	2022_02_25_DLW212het_488ollascosa1_555rad51_male4_stitched	73	119.709	0.484809	5		syp3het	male	5
DLW212het	2022_02_25_DLW212het_488ollascosa1_555rad51_male4_stitched	113	122.609	0.496555	3		syp3het	male	1
DLW212het	2022_02_25_DLW212het_488ollascosa1_555rad51_male4_stitched	99	123.001	0.498139	6		syp3het	male	1
DLW212het	2022_02_25_DLW212het_488ollascosa1_555rad51_male4_stitched	83	123.183	0.498876	10		syp3het	male	2
DLW212het	2022_02_25_DLW212het_488ollascosa1_555rad51_male4_stitched	74	126.177	0.511001	7		syp3het	male	6
DLW212het	2022_02_25_DLW212het_488ollascosa1_555rad51_male4_stitched	70	128.767	0.52149	5		syp3het	male	4
DLW212het	2022_02_25_DLW212het_488ollascosa1_555rad51_male4_stitched	95	128.816	0.52169	3		syp3het	male	2
DLW212het	2022_02_25_DLW212het_488ollascosa1_555rad51_male4_stitched	81	129.863	0.525932	5		syp3het	male	3
DLW212het	2022_02_25_DLW212het_488ollascosa1_555rad51_male4_stitched	105	131.417	0.532224	9		syp3het	male	4
DLW212het	2022_02_25_DLW212het_488ollascosa1_555rad51_male4_stitched	78	134.906	0.546354	3		syp3het	male	6
DLW212het	2022_02_25_DLW212het_488ollascosa1_555rad51_male4_stitched	98	137.062	0.555087	0		syp3het	male	3
DLW212het	2022_02_25_DLW212het_488ollascosa1_555rad51_male4_stitched	76	139.12	0.563422	1		syp3het	male	3
DLW212het	2022_02_25_DLW212het_488ollascosa1_555rad51_male4_stitched	89	140.278	0.568112	3		syp3het	male	2
DLW212het	2022_02_25_DLW212het_488ollascosa1_555rad51_male4_stitched	72	145.146	0.587825	0		syp3het	male	0
DLW212het	2022_02_25_DLW212het_488ollascosa1_555rad51_male4_stitched	86	145.789	0.590428	0		syp3het	male	1
DLW212het	2022_02_25_DLW212het_488ollascosa1_555rad51_male4_stitched	90	149.745	0.606451	1		syp3het	male	4
DLW212het	2022_02_25_DLW212het_488ollascosa1_555rad51_male4_stitched	79	149.959	0.607317	2		syp3het	male	2
DLW212het	2022_02_25_DLW212het_488ollascosa1_555rad51_male4_stitched	94	150.828	0.610837	0		syp3het	male	3
DLW212het	2022_02_25_DLW212het_488ollascosa1_555rad51_male4_stitched	77	151.377	0.61306	0		syp3het	male	4
DLW212het	2022_02_25_DLW212het_488ollascosa1_555rad51_male4_stitched	91	153.728	0.622582	0		syp3het	male	5
DLW212het	2022_02_25_DLW212het_488ollascosa1_555rad51_male4_stitched	88	153.819	0.622948	0		syp3het	male	4
DLW212het	2022_02_25_DLW212het_488ollascosa1_555rad51_male4_stitched	75	154.7	0.626516	0		syp3het	male	4
DLW212het	2022_02_25_DLW212het_488ollascosa1_555rad51_male4_stitched	96	158.566	0.642175	0		syp3het	male	3
DLW212het	2022_02_25_DLW212het_488ollascosa1_555rad51_male4_stitched	69	159.413	0.645605	0		syp3het	male	5
DLW212het	2022_02_25_DLW212het_488ollascosa1_555rad51_male4_stitched	80	159.416	0.645617	1		syp3het	male	5
DLW212het	2022_02_25_DLW212het_488ollascosa1_555rad51_male4_stitched	97	160.437	0.649753	0		syp3het	male	2
DLW212het	2022_02_25_DLW212het_488ollascosa1_555rad51_male4_stitched	85	160.999	0.652027	0		syp3het	male	5
DLW212het	2022_02_25_DLW212het_488ollascosa1_555rad51_male4_stitched	67	165.434	0.669989	1		syp3het	male	4
DLW212het	2022_02_25_DLW212het_488ollascosa1_555rad51_male4_stitched	93	165.583	0.670591	1		syp3het	male	5
DLW212het	2022_02_25_DLW212het_488ollascosa1_555rad51_male4_stitched	100	166.383	0.673831	1		syp3het	male	5
DLW212het	2022_02_25_DLW212het_488ollascosa1_555rad51_male4_stitched	103	167.858	0.679808	2		syp3het	male	6
DLW212het	2022_02_25_DLW212het_488ollascosa1_555rad51_male4_stitched	104	171	0.692529	1		syp3het	male	5
DLW212het	2022_02_25_DLW212het_488ollascosa1_555rad51_male4_stitched	102	172.116	0.69705	1		syp3het	male	4
DLW212het	2022_02_25_DLW212het_488ollascosa1_555rad51_male4_stitched	109	172.238	0.697545	1		syp3het	male	5
DLW212het	2022_02_25_DLW212het_488ollascosa1_555rad51_male4_stitched	106	174.968	0.708601	0		syp3het	male	3
DLW212het	2022_02_25_DLW212het_488ollascosa1_555rad51_male4_stitched	107	175.302	0.709954	1		syp3het	male	4
DLW212het	2022_02_25_DLW212het_488ollascosa1_555rad51_male4_stitched	111	177.055	0.717053	0		syp3het	male	5
DLW212het	2022_02_25_DLW212het_488ollascosa1_555rad51_male4_stitched	116	177.729	0.719783	1		syp3het	male	5
DLW212het	2022_02_25_DLW212het_488ollascosa1_555rad51_male4_stitched	117	179.916	0.72864	1		syp3het	male	6
DLW212het	2022_02_25_DLW212het_488ollascosa1_555rad51_male4_stitched	108	180.318	0.73027	0		syp3het	male	5
DLW212het	2022_02_25_DLW212het_488ollascosa1_555rad51_male4_stitched	115	181.017	0.733098	1		syp3het	male	6
DLW212het	2022_02_25_DLW212het_488ollascosa1_555rad51_male4_stitched	114	182.5	0.739103	0		syp3het	male	3
DLW212het	2022_02_25_DLW212het_488ollascosa1_555rad51_male4_stitched	112	185.833	0.752604	1		syp3het	male	1
DLW212het	2022_02_25_DLW212het_488ollascosa1_555rad51_male4_stitched	118	186.443	0.755074	0		syp3het	male	5
DLW212het	2022_02_25_DLW212het_488ollascosa1_555rad51_male4_stitched	120	187.228	0.758254	0		syp3het	male	5
DLW212het	2022_02_25_DLW212het_488ollascosa1_555rad51_male4_stitched	121	187.249	0.758338	0		syp3het	male	5
DLW212het	2022_02_25_DLW212het_488ollascosa1_555rad51_male4_stitched	122	191.276	0.774648	11		syp3het	male	5
DLW212het	2022_02_25_DLW212het_488ollascosa1_555rad51_male4_stitched	126	195.774	0.792865	1		syp3het	male	5
DLW212het	2022_02_25_DLW212het_488ollascosa1_555rad51_male4_stitched	127	196.236	0.794734	0		syp3het	male	7
DLW212het	2022_02_25_DLW212het_488ollascosa1_555rad51_male4_stitched	125	199.932	0.809701	0		syp3het	male	6
DLW212het	2022_02_25_DLW212het_488ollascosa1_555rad51_male4_stitched	128	201.332	0.815372	0		syp3het	male	4
DLW212het	2022_02_25_DLW212het_488ollascosa1_555rad51_male4_stitched	124	202.012	0.818127	1		syp3het	male	6
DLW212het	2022_02_25_DLW212het_488ollascosa1_555rad51_male4_stitched	129	202.737	0.821061	1		syp3het	male	5
DLW212het	2022_02_25_DLW212het_488ollascosa1_555rad51_male4_stitched	132	205.243	0.831212	0		syp3het	male	5
DLW212het	2022_02_25_DLW212het_488ollascosa1_555rad51_male4_stitched	137	208.509	0.84444	0		syp3het	male	6
DLW212het	2022_02_25_DLW212het_488ollascosa1_555rad51_male4_stitched	130	209.534	0.848588	1		syp3het	male	5
DLW212het	2022_02_25_DLW212het_488ollascosa1_555rad51_male4_stitched	135	211.143	0.855107	2		syp3het	male	5
DLW212het	2022_02_25_DLW212het_488ollascosa1_555rad51_male4_stitched	131	212.606	0.861032	0		syp3het	male	5
DLW212het	2022_02_25_DLW212het_488ollascosa1_555rad51_male4_stitched	136	214.014	0.866734	0		syp3het	male	5
DLW212het	2022_02_25_DLW212het_488ollascosa1_555rad51_male4_stitched	133	215.234	0.871674	1		syp3het	male	6
DLW212het	2022_02_25_DLW212het_488ollascosa1_555rad51_male4_stitched	143	217.787	0.882014	0		syp3het	male	5
DLW212het	2022_02_25_DLW212het_488ollascosa1_555rad51_male4_stitched	142	220.503	0.893014	0		syp3het	male	6
DLW212het	2022_02_25_DLW212het_488ollascosa1_555rad51_male4_stitched	138	220.917	0.89469	0		syp3het	male	8
DLW212het	2022_02_25_DLW212het_488ollascosa1_555rad51_male4_stitched	134	223.409	0.90478	0		syp3het	male	5
DLW212het	2022_02_25_DLW212het_488ollascosa1_555rad51_male4_stitched	147	223.464	0.905004	0		syp3het	male	6
DLW212het	2022_02_25_DLW212het_488ollascosa1_555rad51_male4_stitched	139	223.724	0.906057	0		syp3het	male	5
DLW212het	2022_02_25_DLW212het_488ollascosa1_555rad51_male4_stitched	140	226.6	0.917704	2		syp3het	male	6
DLW212het	2022_02_25_DLW212het_488ollascosa1_555rad51_male4_stitched	149	228.009	0.923412	1		syp3het	male	6
DLW212het	2022_02_25_DLW212het_488ollascosa1_555rad51_male4_stitched	146	230.841	0.93488	0		syp3het	male	5
DLW212het	2022_02_25_DLW212het_488ollascosa1_555rad51_male4_stitched	141	231.302	0.936746	0		syp3het	male	5
DLW212het	2022_02_25_DLW212het_488ollascosa1_555rad51_male4_stitched	145	231.712	0.938409	0		syp3het	male	5
DLW212het	2022_02_25_DLW212het_488ollascosa1_555rad51_male4_stitched	148	233.056	0.943851	1		syp3het	male	5
DLW212het	2022_02_25_DLW212het_488ollascosa1_555rad51_male4_stitched	150	233.554	0.945866	0		syp3het	male	5
DLW212het	2022_02_25_DLW212het_488ollascosa1_555rad51_male4_stitched	144	235.163	0.952384	0		syp3het	male	6
DLW212het	2022_02_25_DLW212het_488ollascosa1_555rad51_male4_stitched	152	236.9	0.959419	0		syp3het	male	5
DLW212het	2022_02_25_DLW212het_488ollascosa1_555rad51_male4_stitched	151	240.247	0.972975	0		syp3het	male	5
DLW212het	2022_02_25_DLW212het_488ollascosa1_555rad51_male4_stitched	153	244.35	0.98959	0		syp3het	male	5
NSV97	2022_02_25_NSV97_488ollascosa1_555rad51_male1_01_stitched	3	3.53328	0.0300759	9		WT	male	0
NSV97	2022_02_25_NSV97_488ollascosa1_555rad51_male1_01_stitched	11	5.7656	0.0490778	6		WT	male	0
NSV97	2022_02_25_NSV97_488ollascosa1_555rad51_male1_01_stitched	9	5.95445	0.0506853	8		WT	male	0
NSV97	2022_02_25_NSV97_488ollascosa1_555rad51_male1_01_stitched	2	7.39728	0.0629669	10		WT	male	0
NSV97	2022_02_25_NSV97_488ollascosa1_555rad51_male1_01_stitched	8	8.9504	0.0761873	5		WT	male	0
NSV97	2022_02_25_NSV97_488ollascosa1_555rad51_male1_01_stitched	1	9.79997	0.0834191	4		WT	male	0
NSV97	2022_02_25_NSV97_488ollascosa1_555rad51_male1_01_stitched	16	9.86301	0.0839556	4		WT	male	0
NSV97	2022_02_25_NSV97_488ollascosa1_555rad51_male1_01_stitched	20	12.4794	0.106227	9		WT	male	0
NSV97	2022_02_25_NSV97_488ollascosa1_555rad51_male1_01_stitched	10	14.6892	0.125037	6		WT	male	0
NSV97	2022_02_25_NSV97_488ollascosa1_555rad51_male1_01_stitched	7	17.567	0.149533	7		WT	male	0
NSV97	2022_02_25_NSV97_488ollascosa1_555rad51_male1_01_stitched	7	18.3381	0.156097	7		WT	male	0
NSV97	2022_02_25_NSV97_488ollascosa1_555rad51_male1_01_stitched	4	22.7125	0.193333	7		WT	male	0
NSV97	2022_02_25_NSV97_488ollascosa1_555rad51_male1_01_stitched	23	23.3239	0.198537	7		WT	male	1
NSV97	2022_02_25_NSV97_488ollascosa1_555rad51_male1_01_stitched	17	23.3995	0.19918	6		WT	male	0
NSV97	2022_02_25_NSV97_488ollascosa1_555rad51_male1_01_stitched	29	25.6454	0.218298	7		WT	male	2
NSV97	2022_02_25_NSV97_488ollascosa1_555rad51_male1_01_stitched	12	29.0819	0.247551	6		WT	male	0
NSV97	2022_02_25_NSV97_488ollascosa1_555rad51_male1_01_stitched	13	29.1623	0.248234	5		WT	male	0
NSV97	2022_02_25_NSV97_488ollascosa1_555rad51_male1_01_stitched	22	32.5523	0.277091	3		WT	male	0
NSV97	2022_02_25_NSV97_488ollascosa1_555rad51_male1_01_stitched	24	36.7573	0.312884	2		WT	male	0
NSV97	2022_02_25_NSV97_488ollascosa1_555rad51_male1_01_stitched	15	38.3255	0.326233	2		WT	male	0
NSV97	2022_02_25_NSV97_488ollascosa1_555rad51_male1_01_stitched	19	39.7357	0.338237	4		WT	male	0
NSV97	2022_02_25_NSV97_488ollascosa1_555rad51_male1_01_stitched	6	42.9723	0.365788	3		WT	male	1
NSV97	2022_02_25_NSV97_488ollascosa1_555rad51_male1_01_stitched	25	43.7945	0.372787	6		WT	male	3
NSV97	2022_02_25_NSV97_488ollascosa1_555rad51_male1_01_stitched	33	46.6515	0.397106	5		WT	male	0
NSV97	2022_02_25_NSV97_488ollascosa1_555rad51_male1_01_stitched	14	48.4219	0.412176	6		WT	male	1
NSV97	2022_02_25_NSV97_488ollascosa1_555rad51_male1_01_stitched	21	51.8022	0.44095	1		WT	male	0
NSV97	2022_02_25_NSV97_488ollascosa1_555rad51_male1_01_stitched	30	52.7536	0.449048	5		WT	male	0
NSV97	2022_02_25_NSV97_488ollascosa1_555rad51_male1_01_stitched	35	54.0266	0.459884	7		WT	male	0
NSV97	2022_02_25_NSV97_488ollascosa1_555rad51_male1_01_stitched	26	57.1316	0.486314	6		WT	male	2
NSV97	2022_02_25_NSV97_488ollascosa1_555rad51_male1_01_stitched	31	58.2098	0.495492	6		WT	male	0
NSV97	2022_02_25_NSV97_488ollascosa1_555rad51_male1_01_stitched	27	64.5088	0.54911	2		WT	male	5
NSV97	2022_02_25_NSV97_488ollascosa1_555rad51_male1_01_stitched	18	67.4543	0.574183	7		WT	male	5
NSV97	2022_02_25_NSV97_488ollascosa1_555rad51_male1_01_stitched	32	67.5137	0.574688	3		WT	male	4
NSV97	2022_02_25_NSV97_488ollascosa1_555rad51_male1_01_stitched	62	69.528	0.591834	8		WT	male	4
NSV97	2022_02_25_NSV97_488ollascosa1_555rad51_male1_01_stitched	52	70.5854	0.600836	4		WT	male	1
NSV97	2022_02_25_NSV97_488ollascosa1_555rad51_male1_01_stitched	28	71.548	0.609029	5		WT	male	4
NSV97	2022_02_25_NSV97_488ollascosa1_555rad51_male1_01_stitched	56	74.3351	0.632753	3		WT	male	3
NSV97	2022_02_25_NSV97_488ollascosa1_555rad51_male1_01_stitched	65	77.3823	0.658692	2		WT	male	4
NSV97	2022_02_25_NSV97_488ollascosa1_555rad51_male1_01_stitched	51	78.1356	0.665104	1		WT	male	4
NSV97	2022_02_25_NSV97_488ollascosa1_555rad51_male1_01_stitched	58	80.6879	0.68683	1		WT	male	4
NSV97	2022_02_25_NSV97_488ollascosa1_555rad51_male1_01_stitched	68	85.3729	0.726709	1		WT	male	6
NSV97	2022_02_25_NSV97_488ollascosa1_555rad51_male1_01_stitched	46	86.4468	0.73585	0		WT	male	4
NSV97	2022_02_25_NSV97_488ollascosa1_555rad51_male1_01_stitched	59	86.6964	0.737975	2		WT	male	5
NSV97	2022_02_25_NSV97_488ollascosa1_555rad51_male1_01_stitched	69	88.6819	0.754876	0		WT	male	3
NSV97	2022_02_25_NSV97_488ollascosa1_555rad51_male1_01_stitched	66	90.5629	0.770887	0		WT	male	2
NSV97	2022_02_25_NSV97_488ollascosa1_555rad51_male1_01_stitched	49	91.9407	0.782615	2		WT	male	4
NSV97	2022_02_25_NSV97_488ollascosa1_555rad51_male1_01_stitched	61	95.4185	0.812219	1		WT	male	6
NSV97	2022_02_25_NSV97_488ollascosa1_555rad51_male1_01_stitched	44	95.7609	0.815134	0		WT	male	5
NSV97	2022_02_25_NSV97_488ollascosa1_555rad51_male1_01_stitched	70	97.6814	0.831481	0		WT	male	5
NSV97	2022_02_25_NSV97_488ollascosa1_555rad51_male1_01_stitched	67	98.5989	0.839291	1		WT	male	6
NSV97	2022_02_25_NSV97_488ollascosa1_555rad51_male1_01_stitched	53	101.579	0.864659	1		WT	male	8
NSV97	2022_02_25_NSV97_488ollascosa1_555rad51_male1_01_stitched	63	104.588	0.890275	0		WT	male	6
NSV97	2022_02_25_NSV97_488ollascosa1_555rad51_male1_01_stitched	48	110.322	0.939076	0		WT	male	3
NSV97	2022_02_25_NSV97_488ollascosa1_555rad51_male1_01_stitched	43	112.094	0.954166	0		WT	male	4
NSV97	2022_02_25_NSV97_488ollascosa1_555rad51_male1_01_stitched	57	113.267	0.964148	0		WT	male	5
NSV97	2022_02_25_NSV97_488ollascosa1_555rad51_male1_01_stitched	41	113.296	0.964397	2		WT	male	4
NSV97	2022_02_25_NSV97_488ollascosa1_555rad51_male3_stitched	14	5.09259	0.030358	7		WT	male	1
NSV97	2022_02_25_NSV97_488ollascosa1_555rad51_male3_stitched	7	6.17899	0.0368343	18		WT	male	0
NSV97	2022_02_25_NSV97_488ollascosa1_555rad51_male3_stitched	1	6.91584	0.0412268	7		WT	male	1
NSV97	2022_02_25_NSV97_488ollascosa1_555rad51_male3_stitched	21	10.2807	0.0612856	7		WT	male	0
NSV97	2022_02_25_NSV97_488ollascosa1_555rad51_male3_stitched	2	10.6191	0.0633027	2		WT	male	0
NSV97	2022_02_25_NSV97_488ollascosa1_555rad51_male3_stitched	4	10.8508	0.0646842	7		WT	male	0
NSV97	2022_02_25_NSV97_488ollascosa1_555rad51_male3_stitched	19	11.8753	0.0707915	10		WT	male	0
NSV97	2022_02_25_NSV97_488ollascosa1_555rad51_male3_stitched	20	13.1411	0.0783367	5		WT	male	0
NSV97	2022_02_25_NSV97_488ollascosa1_555rad51_male3_stitched	10	19.1096	0.113917	10		WT	male	0
NSV97	2022_02_25_NSV97_488ollascosa1_555rad51_male3_stitched	6	19.4052	0.115678	6		WT	male	2
NSV97	2022_02_25_NSV97_488ollascosa1_555rad51_male3_stitched	22	19.4498	0.115944	8		WT	male	0
NSV97	2022_02_25_NSV97_488ollascosa1_555rad51_male3_stitched	3	23.2218	0.13843	8		WT	male	0
NSV97	2022_02_25_NSV97_488ollascosa1_555rad51_male3_stitched	24	25.9156	0.154488	11		WT	male	0
NSV97	2022_02_25_NSV97_488ollascosa1_555rad51_male3_stitched	12	25.9734	0.154833	4		WT	male	0
NSV97	2022_02_25_NSV97_488ollascosa1_555rad51_male3_stitched	30	28.458	0.169644	7		WT	male	0
NSV97	2022_02_25_NSV97_488ollascosa1_555rad51_male3_stitched	16	28.8131	0.171761	11		WT	male	0
NSV97	2022_02_25_NSV97_488ollascosa1_555rad51_male3_stitched	27	30.0777	0.1793	8		WT	male	0
NSV97	2022_02_25_NSV97_488ollascosa1_555rad51_male3_stitched	11	31.7327	0.189166	5		WT	male	0
NSV97	2022_02_25_NSV97_488ollascosa1_555rad51_male3_stitched	18	32.1296	0.191532	4		WT	male	0
NSV97	2022_02_25_NSV97_488ollascosa1_555rad51_male3_stitched	9	33.3767	0.198965	7		WT	male	0
NSV97	2022_02_25_NSV97_488ollascosa1_555rad51_male3_stitched	25	35.0716	0.209069	6		WT	male	0
NSV97	2022_02_25_NSV97_488ollascosa1_555rad51_male3_stitched	32	36.2083	0.215846	5		WT	male	0
NSV97	2022_02_25_NSV97_488ollascosa1_555rad51_male3_stitched	5	37.2532	0.222074	6		WT	male	0
NSV97	2022_02_25_NSV97_488ollascosa1_555rad51_male3_stitched	15	37.6841	0.224643	3		WT	male	0
NSV97	2022_02_25_NSV97_488ollascosa1_555rad51_male3_stitched	13	40.4394	0.241068	5		WT	male	0
NSV97	2022_02_25_NSV97_488ollascosa1_555rad51_male3_stitched	29	41.2394	0.245837	6		WT	male	0
NSV97	2022_02_25_NSV97_488ollascosa1_555rad51_male3_stitched	31	41.4684	0.247202	9		WT	male	0
NSV97	2022_02_25_NSV97_488ollascosa1_555rad51_male3_stitched	26	43.2424	0.257777	8		WT	male	0
NSV97	2022_02_25_NSV97_488ollascosa1_555rad51_male3_stitched	33	46.2068	0.275449	3		WT	male	0
NSV97	2022_02_25_NSV97_488ollascosa1_555rad51_male3_stitched	17	47.3114	0.282033	3		WT	male	0
NSV97	2022_02_25_NSV97_488ollascosa1_555rad51_male3_stitched	8	48.1002	0.286736	4		WT	male	0
NSV97	2022_02_25_NSV97_488ollascosa1_555rad51_male3_stitched	28	48.4838	0.289022	8		WT	male	0
NSV97	2022_02_25_NSV97_488ollascosa1_555rad51_male3_stitched	23	55.1542	0.328786	0		WT	male	0
NSV97	2022_02_25_NSV97_488ollascosa1_555rad51_male3_stitched	65	59.5435	0.354952	0		WT	male	0
NSV97	2022_02_25_NSV97_488ollascosa1_555rad51_male3_stitched	78	60.6641	0.361632	2		WT	male	0
NSV97	2022_02_25_NSV97_488ollascosa1_555rad51_male3_stitched	51	61.0197	0.363751	0		WT	male	0
NSV97	2022_02_25_NSV97_488ollascosa1_555rad51_male3_stitched	73	63.8252	0.380476	1		WT	male	1
NSV97	2022_02_25_NSV97_488ollascosa1_555rad51_male3_stitched	76	63.8759	0.380778	1		WT	male	1
NSV97	2022_02_25_NSV97_488ollascosa1_555rad51_male3_stitched	87	64.2148	0.382798	2		WT	male	0
NSV97	2022_02_25_NSV97_488ollascosa1_555rad51_male3_stitched	37	69.4035	0.413729	4		WT	male	3
NSV97	2022_02_25_NSV97_488ollascosa1_555rad51_male3_stitched	43	69.8555	0.416423	3		WT	male	1
NSV97	2022_02_25_NSV97_488ollascosa1_555rad51_male3_stitched	57	70.0068	0.417325	1		WT	male	1
NSV97	2022_02_25_NSV97_488ollascosa1_555rad51_male3_stitched	70	74.0408	0.441373	1		WT	male	0
NSV97	2022_02_25_NSV97_488ollascosa1_555rad51_male3_stitched	91	74.1282	0.441894	8		WT	male	2
NSV97	2022_02_25_NSV97_488ollascosa1_555rad51_male3_stitched	49	75.6792	0.45114	5		WT	male	2
NSV97	2022_02_25_NSV97_488ollascosa1_555rad51_male3_stitched	47	77.2899	0.460741	2		WT	male	5
NSV97	2022_02_25_NSV97_488ollascosa1_555rad51_male3_stitched	68	81.1722	0.483885	1		WT	male	4
NSV97	2022_02_25_NSV97_488ollascosa1_555rad51_male3_stitched	48	82.5834	0.492297	1		WT	male	4
NSV97	2022_02_25_NSV97_488ollascosa1_555rad51_male3_stitched	34	83.1593	0.49573	2		WT	male	5
NSV97	2022_02_25_NSV97_488ollascosa1_555rad51_male3_stitched	44	88.8897	0.529891	1		WT	male	5
NSV97	2022_02_25_NSV97_488ollascosa1_555rad51_male3_stitched	62	89.3167	0.532436	3		WT	male	5
NSV97	2022_02_25_NSV97_488ollascosa1_555rad51_male3_stitched	46	91.1887	0.543595	1		WT	male	4
NSV97	2022_02_25_NSV97_488ollascosa1_555rad51_male3_stitched	83	93.2074	0.555629	3		WT	male	7
NSV97	2022_02_25_NSV97_488ollascosa1_555rad51_male3_stitched	66	94.216	0.561642	0		WT	male	5
NSV97	2022_02_25_NSV97_488ollascosa1_555rad51_male3_stitched	59	96.5985	0.575844	0		WT	male	5
NSV97	2022_02_25_NSV97_488ollascosa1_555rad51_male3_stitched	41	97.6627	0.582188	1		WT	male	5
NSV97	2022_02_25_NSV97_488ollascosa1_555rad51_male3_stitched	42	97.9239	0.583745	0		WT	male	6
NSV97	2022_02_25_NSV97_488ollascosa1_555rad51_male3_stitched	82	99.9321	0.595716	4		WT	male	6
NSV97	2022_02_25_NSV97_488ollascosa1_555rad51_male3_stitched	90	101.241	0.603522	0		WT	male	5
NSV97	2022_02_25_NSV97_488ollascosa1_555rad51_male3_stitched	61	102.132	0.608831	6		WT	male	7
NSV97	2022_02_25_NSV97_488ollascosa1_555rad51_male3_stitched	56	105.421	0.628437	1		WT	male	5
NSV97	2022_02_25_NSV97_488ollascosa1_555rad51_male3_stitched	81	106.037	0.632112	0		WT	male	6
NSV97	2022_02_25_NSV97_488ollascosa1_555rad51_male3_stitched	63	107.454	0.640557	0		WT	male	3
NSV97	2022_02_25_NSV97_488ollascosa1_555rad51_male3_stitched	40	107.78	0.6425	3		WT	male	5
NSV97	2022_02_25_NSV97_488ollascosa1_555rad51_male3_stitched	79	109.24	0.6512	0		WT	male	6
NSV97	2022_02_25_NSV97_488ollascosa1_555rad51_male3_stitched	74	109.87	0.654961	0		WT	male	5
NSV97	2022_02_25_NSV97_488ollascosa1_555rad51_male3_stitched	93	110.688	0.659836	1		WT	male	8
NSV97	2022_02_25_NSV97_488ollascosa1_555rad51_male3_stitched	45	113.308	0.675451	1		WT	male	5
NSV97	2022_02_25_NSV97_488ollascosa1_555rad51_male3_stitched	80	113.909	0.679037	0		WT	male	5
NSV97	2022_02_25_NSV97_488ollascosa1_555rad51_male3_stitched	92	115.353	0.687641	0		WT	male	5
NSV97	2022_02_25_NSV97_488ollascosa1_555rad51_male3_stitched	55	115.655	0.689443	1		WT	male	6
NSV97	2022_02_25_NSV97_488ollascosa1_555rad51_male3_stitched	89	115.796	0.690286	1		WT	male	5
NSV97	2022_02_25_NSV97_488ollascosa1_555rad51_male3_stitched	58	118.644	0.70726	1		WT	male	7
NSV97	2022_02_25_NSV97_488ollascosa1_555rad51_male3_stitched	39	119.515	0.712456	0		WT	male	5
NSV97	2022_02_25_NSV97_488ollascosa1_555rad51_male3_stitched	77	120.441	0.717974	2		WT	male	4
NSV97	2022_02_25_NSV97_488ollascosa1_555rad51_male3_stitched	35	123.525	0.736356	0		WT	male	5
NSV97	2022_02_25_NSV97_488ollascosa1_555rad51_male3_stitched	60	124.367	0.741378	0		WT	male	5
NSV97	2022_02_25_NSV97_488ollascosa1_555rad51_male3_stitched	67	125.399	0.747528	0		WT	male	6
NSV97	2022_02_25_NSV97_488ollascosa1_555rad51_male3_stitched	75	127.48	0.759936	0		WT	male	6
NSV97	2022_02_25_NSV97_488ollascosa1_555rad51_male3_stitched	101	130.254	0.776473	0		WT	male	4
NSV97	2022_02_25_NSV97_488ollascosa1_555rad51_male3_stitched	99	131.607	0.784538	0		WT	male	5
NSV97	2022_02_25_NSV97_488ollascosa1_555rad51_male3_stitched	86	133.133	0.793633	4		WT	male	5
NSV97	2022_02_25_NSV97_488ollascosa1_555rad51_male3_stitched	88	133.152	0.793749	4		WT	male	5
NSV97	2022_02_25_NSV97_488ollascosa1_555rad51_male3_stitched	71	133.507	0.795862	0		WT	male	5
NSV97	2022_02_25_NSV97_488ollascosa1_555rad51_male3_stitched	100	135.509	0.807796	1		WT	male	5
NSV97	2022_02_25_NSV97_488ollascosa1_555rad51_male3_stitched	94	140.658	0.838493	1		WT	male	6
NSV97	2022_02_25_NSV97_488ollascosa1_555rad51_male3_stitched	50	141.054	0.84085	1		WT	male	5
NSV97	2022_02_25_NSV97_488ollascosa1_555rad51_male3_stitched	69	141.343	0.842577	0		WT	male	6
NSV97	2022_02_25_NSV97_488ollascosa1_555rad51_male3_stitched	102	141.813	0.845379	0		WT	male	5
NSV97	2022_02_25_NSV97_488ollascosa1_555rad51_male3_stitched	38	144.982	0.864267	0		WT	male	5
NSV97	2022_02_25_NSV97_488ollascosa1_555rad51_male3_stitched	53	145.722	0.868682	1		WT	male	5
NSV97	2022_02_25_NSV97_488ollascosa1_555rad51_male3_stitched	95	148.176	0.883307	0		WT	male	5
NSV97	2022_02_25_NSV97_488ollascosa1_555rad51_male3_stitched	98	148.638	0.886061	0		WT	male	6
NSV97	2022_02_25_NSV97_488ollascosa1_555rad51_male3_stitched	54	148.703	0.886453	0		WT	male	6
NSV97	2022_02_25_NSV97_488ollascosa1_555rad51_male3_stitched	84	150.414	0.896647	0		WT	male	6
NSV97	2022_02_25_NSV97_488ollascosa1_555rad51_male3_stitched	103	151.995	0.906076	1		WT	male	5
NSV97	2022_02_25_NSV97_488ollascosa1_555rad51_male3_stitched	85	156.106	0.930583	0		WT	male	5
NSV97	2022_02_25_NSV97_488ollascosa1_555rad51_male3_stitched	97	156.672	0.933957	2		WT	male	6
NSV97	2022_02_25_NSV97_488ollascosa1_555rad51_male3_stitched	52	158.453	0.944569	0		WT	male	6
NSV97	2022_02_25_NSV97_488ollascosa1_555rad51_male3_stitched	72	158.516	0.944949	0		WT	male	4
NSV97	2022_02_25_NSV97_488ollascosa1_555rad51_male3_stitched	96	160.368	0.955987	2		WT	male	6
NSV97	2022_02_25_NSV97_488ollascosa1_555rad51_male3_stitched	64	164.032	0.977831	0		WT	male	6
NSV97	2022_02_25_NSV97_488ollascosa1_555rad51_male5_stitched	1	3.81572	0.0227223	13		WT	male	0
NSV97	2022_02_25_NSV97_488ollascosa1_555rad51_male5_stitched	4	4.15967	0.0247705	11		WT	male	0
NSV97	2022_02_25_NSV97_488ollascosa1_555rad51_male5_stitched	2	4.43216	0.0263932	13		WT	male	0
NSV97	2022_02_25_NSV97_488ollascosa1_555rad51_male5_stitched	7	9.10356	0.054211	12		WT	male	0
NSV97	2022_02_25_NSV97_488ollascosa1_555rad51_male5_stitched	7	9.65237	0.0574791	12		WT	male	0
NSV97	2022_02_25_NSV97_488ollascosa1_555rad51_male5_stitched	9	9.68154	0.0576528	11		WT	male	0
NSV97	2022_02_25_NSV97_488ollascosa1_555rad51_male5_stitched	6	10.8623	0.0646841	15		WT	male	0
NSV97	2022_02_25_NSV97_488ollascosa1_555rad51_male5_stitched	11	13.8083	0.0822271	11		WT	male	0
NSV97	2022_02_25_NSV97_488ollascosa1_555rad51_male5_stitched	11	14.5012	0.0863532	11		WT	male	0
NSV97	2022_02_25_NSV97_488ollascosa1_555rad51_male5_stitched	10	15.8983	0.0946731	11		WT	male	0
NSV97	2022_02_25_NSV97_488ollascosa1_555rad51_male5_stitched	8	19.0688	0.113553	6		WT	male	0
NSV97	2022_02_25_NSV97_488ollascosa1_555rad51_male5_stitched	14	20.0705	0.119518	17		WT	male	0
NSV97	2022_02_25_NSV97_488ollascosa1_555rad51_male5_stitched	13	20.7734	0.123704	6		WT	male	0
NSV97	2022_02_25_NSV97_488ollascosa1_555rad51_male5_stitched	15	22.5044	0.134012	16		WT	male	0
NSV97	2022_02_25_NSV97_488ollascosa1_555rad51_male5_stitched	16	23.0607	0.137325	5		WT	male	0
NSV97	2022_02_25_NSV97_488ollascosa1_555rad51_male5_stitched	12	24.6337	0.146692	5		WT	male	0
NSV97	2022_02_25_NSV97_488ollascosa1_555rad51_male5_stitched	19	26.8009	0.159597	0		WT	male	0
NSV97	2022_02_25_NSV97_488ollascosa1_555rad51_male5_stitched	17	29.5824	0.176161	2		WT	male	0
NSV97	2022_02_25_NSV97_488ollascosa1_555rad51_male5_stitched	18	30.6276	0.182385	8		WT	male	0
NSV97	2022_02_25_NSV97_488ollascosa1_555rad51_male5_stitched	22	35.0163	0.20852	10		WT	male	0
NSV97	2022_02_25_NSV97_488ollascosa1_555rad51_male5_stitched	23	35.864	0.213567	5		WT	male	0
NSV97	2022_02_25_NSV97_488ollascosa1_555rad51_male5_stitched	21	38.6521	0.23017	7		WT	male	0
NSV97	2022_02_25_NSV97_488ollascosa1_555rad51_male5_stitched	20	39.1706	0.233258	11		WT	male	0
[truncated: 13,478 more rows]
