# Supplementary material for: Sexual dimorphic regulation of recombination by the synaptonemal complex in C. elegans
Source: eLife. 2023 Oct 5;12:e84538. doi: 10.7554/eLife.84538 (PMC10611432; doi:10.7554/eLife.84538)
Supplement: Figure 7—source data 1. [file elife-84538-fig7-data1.xlsx]

## Sheet: Sheet1
nucleus_x_position	normalized_nucleus_position	meiosis_stage	Sex	Strain_number	image_name	Volume	Genotype	Protein	sum_intensity	sum_intensity_normalized_vol
0.0616971	-0.0606586	TZ	Herm	DLW118	2021_07_22_DLW118_20C_herm_01001_Statistics	18.3706	WT	SYP2GFP	2090000	113769
0.0749241	-0.0457068	TZ	Herm	DLW118	2021_07_22_DLW118_20C_herm_01001_Statistics	16.6051	WT	SYP2GFP	2080000	125263
0.102889	-0.0140957	TZ	Herm	DLW118	2021_07_22_DLW118_20C_herm_01001_Statistics	17.1555	WT	SYP2GFP	2270000	132319
0.0524799	-0.0710777	TZ	Herm	DLW118	2021_07_22_DLW118_20C_herm_01001_Statistics	15.9892	WT	SYP2GFP	1930000	120706
0.0868587	-0.0322159	TZ	Herm	DLW118	2021_07_22_DLW118_20C_herm_01001_Statistics	17.2951	WT	SYP2GFP	2270000	131251
0.0981681	-0.0194318	TZ	Herm	DLW118	2021_07_22_DLW118_20C_herm_01001_Statistics	17.3455	WT	SYP2GFP	2270000	130870
0.0600177	-0.062557	TZ	Herm	DLW118	2021_07_22_DLW118_20C_herm_01001_Statistics	15.1189	WT	SYP2GFP	2020000	133608
0.075832	-0.0446805	TZ	Herm	DLW118	2021_07_22_DLW118_20C_herm_01001_Statistics	19.709	WT	SYP2GFP	2590000	131412
0.096497	-0.0213208	TZ	Herm	DLW118	2021_07_22_DLW118_20C_herm_01001_Statistics	17.4608	WT	SYP2GFP	2440000	139742
0.106274	-0.0102688	TZ	Herm	DLW118	2021_07_22_DLW118_20C_herm_01001_Statistics	24.7386	WT	SYP2GFP	3420000	138245
0.0922571	-0.0261136	TZ	Herm	DLW118	2021_07_22_DLW118_20C_herm_01001_Statistics	21.164	WT	SYP2GFP	2860000	135135
0.0934821	-0.0247288	TZ	Herm	DLW118	2021_07_22_DLW118_20C_herm_01001_Statistics	20.984	WT	SYP2GFP	3020000	143919
0.0693468	-0.0520113	TZ	Herm	DLW118	2021_07_22_DLW118_20C_herm_01001_Statistics	17.9028	WT	SYP2GFP	2260000	126237
0.0483061	-0.0757958	TZ	Herm	DLW118	2021_07_22_DLW118_20C_herm_01001_Statistics	20.0858	WT	SYP2GFP	2490000	123968
0.111247	-0.00464733	TZ	Herm	DLW118	2021_07_22_DLW118_20C_herm_01001_Statistics	24.3707	WT	SYP2GFP	3390000	139101
0.127041	0.0132063	EP	Herm	DLW118	2021_07_22_DLW118_20C_herm_01001_Statistics	22.5303	WT	SYP2GFP	3120000	138480
0.189321	0.0836073	EP	Herm	DLW118	2021_07_22_DLW118_20C_herm_01001_Statistics	20.8687	WT	SYP2GFP	2550000	122193
0.142934	0.0311715	EP	Herm	DLW118	2021_07_22_DLW118_20C_herm_01001_Statistics	25.4706	WT	SYP2GFP	3590000	140947
0.121047	0.00643007	EP	Herm	DLW118	2021_07_22_DLW118_20C_herm_01001_Statistics	18.3271	WT	SYP2GFP	2390000	130408
0.13645	0.0238424	EP	Herm	DLW118	2021_07_22_DLW118_20C_herm_01001_Statistics	21.3611	WT	SYP2GFP	3360000	157295
0.148894	0.0379093	EP	Herm	DLW118	2021_07_22_DLW118_20C_herm_01001_Statistics	22.7053	WT	SYP2GFP	3590000	158113
0.166165	0.0574316	EP	Herm	DLW118	2021_07_22_DLW118_20C_herm_01001_Statistics	13.062	WT	SYP2GFP	1680000	128617
0.266926	0.171333	EP	Herm	DLW118	2021_07_22_DLW118_20C_herm_01001_Statistics	19.851	WT	SYP2GFP	2560000	128961
0.173153	0.0653312	EP	Herm	DLW118	2021_07_22_DLW118_20C_herm_01001_Statistics	25.8017	WT	SYP2GFP	3530000	136813
0.22856	0.127963	EP	Herm	DLW118	2021_07_22_DLW118_20C_herm_01001_Statistics	12.6527	WT	SYP2GFP	1710000	135149
0.13736	0.0248703	EP	Herm	DLW118	2021_07_22_DLW118_20C_herm_01001_Statistics	22.1406	WT	SYP2GFP	3110000	140466
0.23944	0.140263	EP	Herm	DLW118	2021_07_22_DLW118_20C_herm_01001_Statistics	29.7624	WT	SYP2GFP	4220000	141790
0.258531	0.161843	EP	Herm	DLW118	2021_07_22_DLW118_20C_herm_01001_Statistics	29.2991	WT	SYP2GFP	4560000	155636
0.217913	0.115928	EP	Herm	DLW118	2021_07_22_DLW118_20C_herm_01001_Statistics	33.7791	WT	SYP2GFP	4910000	145356
0.205053	0.101391	EP	Herm	DLW118	2021_07_22_DLW118_20C_herm_01001_Statistics	27.1071	WT	SYP2GFP	3950000	145718
0.232222	0.132103	EP	Herm	DLW118	2021_07_22_DLW118_20C_herm_01001_Statistics	31.9456	WT	SYP2GFP	4520000	141491
0.212088	0.109343	EP	Herm	DLW118	2021_07_22_DLW118_20C_herm_01001_Statistics	22.922	WT	SYP2GFP	3310000	144403
0.2665	0.170851	EP	Herm	DLW118	2021_07_22_DLW118_20C_herm_01001_Statistics	18.9284	WT	SYP2GFP	2520000	133133
0.197365	0.0927007	EP	Herm	DLW118	2021_07_22_DLW118_20C_herm_01001_Statistics	21.8222	WT	SYP2GFP	3120000	142974
0.18361	0.0771523	EP	Herm	DLW118	2021_07_22_DLW118_20C_herm_01001_Statistics	20.8452	WT	SYP2GFP	2830000	135763
0.246651	0.148414	EP	Herm	DLW118	2021_07_22_DLW118_20C_herm_01001_Statistics	16.5634	WT	SYP2GFP	2300000	138860
0.159804	0.0502418	EP	Herm	DLW118	2021_07_22_DLW118_20C_herm_01001_Statistics	27.2379	WT	SYP2GFP	3880000	142449
0.255347	0.158244	EP	Herm	DLW118	2021_07_22_DLW118_20C_herm_01001_Statistics	26.8703	WT	SYP2GFP	3620000	134721
0.300118	0.208853	EP	Herm	DLW118	2021_07_22_DLW118_20C_herm_01001_Statistics	33.6346	WT	SYP2GFP	4540000	134980
0.313556	0.224043	EP	Herm	DLW118	2021_07_22_DLW118_20C_herm_01001_Statistics	27.0029	WT	SYP2GFP	3810000	141096
0.298085	0.206554	EP	Herm	DLW118	2021_07_22_DLW118_20C_herm_01001_Statistics	32.4599	WT	SYP2GFP	4730000	145718
0.291617	0.199244	EP	Herm	DLW118	2021_07_22_DLW118_20C_herm_01001_Statistics	29.0273	WT	SYP2GFP	3920000	135045
0.316963	0.227894	EP	Herm	DLW118	2021_07_22_DLW118_20C_herm_01001_Statistics	30.4187	WT	SYP2GFP	4400000	144648
0.335765	0.249148	EP	Herm	DLW118	2021_07_22_DLW118_20C_herm_01001_Statistics	27.0354	WT	SYP2GFP	3830000	141666
0.35742	0.273627	EP	Herm	DLW118	2021_07_22_DLW118_20C_herm_01001_Statistics	31.4992	WT	SYP2GFP	4800000	152385
0.38638	0.306363	EP	Herm	DLW118	2021_07_22_DLW118_20C_herm_01001_Statistics	33.1565	WT	SYP2GFP	4720000	142355
0.364811	0.281981	EP	Herm	DLW118	2021_07_22_DLW118_20C_herm_01001_Statistics	27.0855	WT	SYP2GFP	4020000	148419
0.33355	0.246644	EP	Herm	DLW118	2021_07_22_DLW118_20C_herm_01001_Statistics	25.8311	WT	SYP2GFP	3980000	154078
0.396571	0.317883	EP	Herm	DLW118	2021_07_22_DLW118_20C_herm_01001_Statistics	23.9718	WT	SYP2GFP	3270000	136410
0.316783	0.22769	EP	Herm	DLW118	2021_07_22_DLW118_20C_herm_01001_Statistics	24.0497	WT	SYP2GFP	3290000	136800
0.337059	0.250611	EP	Herm	DLW118	2021_07_22_DLW118_20C_herm_01001_Statistics	35.4908	WT	SYP2GFP	5320000	149898
0.316646	0.227535	EP	Herm	DLW118	2021_07_22_DLW118_20C_herm_01001_Statistics	22.1622	WT	SYP2GFP	3150000	142134
0.399912	0.32166	EP	Herm	DLW118	2021_07_22_DLW118_20C_herm_01001_Statistics	33.4452	WT	SYP2GFP	5070000	151591
0.413602	0.337135	MP	Herm	DLW118	2021_07_22_DLW118_20C_herm_01001_Statistics	38.8466	WT	SYP2GFP	6570000	169127
0.381862	0.301256	EP	Herm	DLW118	2021_07_22_DLW118_20C_herm_01001_Statistics	34.8096	WT	SYP2GFP	5170000	148522
0.432691	0.358713	MP	Herm	DLW118	2021_07_22_DLW118_20C_herm_01001_Statistics	32.851	WT	SYP2GFP	5010000	152507
0.389143	0.309487	EP	Herm	DLW118	2021_07_22_DLW118_20C_herm_01001_Statistics	35.273	WT	SYP2GFP	5880000	166700
0.410478	0.333603	MP	Herm	DLW118	2021_07_22_DLW118_20C_herm_01001_Statistics	31.8573	WT	SYP2GFP	4210000	132152
0.418345	0.342497	MP	Herm	DLW118	2021_07_22_DLW118_20C_herm_01001_Statistics	31.9913	WT	SYP2GFP	4650000	145352
0.427449	0.352788	MP	Herm	DLW118	2021_07_22_DLW118_20C_herm_01001_Statistics	36.4002	WT	SYP2GFP	5990000	164560
0.395636	0.316826	EP	Herm	DLW118	2021_07_22_DLW118_20C_herm_01001_Statistics	37.5459	WT	SYP2GFP	5990000	159538
0.474277	0.405722	MP	Herm	DLW118	2021_07_22_DLW118_20C_herm_01001_Statistics	38.4682	WT	SYP2GFP	6240000	162212
0.493734	0.427717	MP	Herm	DLW118	2021_07_22_DLW118_20C_herm_01001_Statistics	40.0821	WT	SYP2GFP	6410000	159922
0.45071	0.379082	MP	Herm	DLW118	2021_07_22_DLW118_20C_herm_01001_Statistics	31.387	WT	SYP2GFP	4600000	146557
0.45064	0.379003	MP	Herm	DLW118	2021_07_22_DLW118_20C_herm_01001_Statistics	26.9791	WT	SYP2GFP	4110000	152340
0.462708	0.392645	MP	Herm	DLW118	2021_07_22_DLW118_20C_herm_01001_Statistics	39.7641	WT	SYP2GFP	6480000	162961
0.481232	0.413584	MP	Herm	DLW118	2021_07_22_DLW118_20C_herm_01001_Statistics	32.1686	WT	SYP2GFP	4930000	153255
0.495488	0.429699	MP	Herm	DLW118	2021_07_22_DLW118_20C_herm_01001_Statistics	40.4499	WT	SYP2GFP	6490000	160445
0.441365	0.368518	MP	Herm	DLW118	2021_07_22_DLW118_20C_herm_01001_Statistics	36.7185	WT	SYP2GFP	6070000	165312
0.457421	0.386668	MP	Herm	DLW118	2021_07_22_DLW118_20C_herm_01001_Statistics	32.1841	WT	SYP2GFP	5200000	161570
0.440232	0.367238	MP	Herm	DLW118	2021_07_22_DLW118_20C_herm_01001_Statistics	35.8908	WT	SYP2GFP	5680000	158258
0.459026	0.388483	MP	Herm	DLW118	2021_07_22_DLW118_20C_herm_01001_Statistics	28.7855	WT	SYP2GFP	4070000	141391
0.530003	0.468715	MP	Herm	DLW118	2021_07_22_DLW118_20C_herm_01001_Statistics	46.5894	WT	SYP2GFP	7770000	166776
0.472958	0.404231	MP	Herm	DLW118	2021_07_22_DLW118_20C_herm_01001_Statistics	29.7584	WT	SYP2GFP	4130000	138784
0.491268	0.424929	MP	Herm	DLW118	2021_07_22_DLW118_20C_herm_01001_Statistics	39.3269	WT	SYP2GFP	6270000	159433
0.553961	0.495797	MP	Herm	DLW118	2021_07_22_DLW118_20C_herm_01001_Statistics	27.7085	WT	SYP2GFP	3940000	142195
0.582292	0.527822	MP	Herm	DLW118	2021_07_22_DLW118_20C_herm_01001_Statistics	29.7582	WT	SYP2GFP	4140000	139121
0.599956	0.547789	MP	Herm	DLW118	2021_07_22_DLW118_20C_herm_01001_Statistics	31.5416	WT	SYP2GFP	4410000	139815
0.52456	0.462562	MP	Herm	DLW118	2021_07_22_DLW118_20C_herm_01001_Statistics	50.198	WT	SYP2GFP	8950000	178294
0.547161	0.48811	MP	Herm	DLW118	2021_07_22_DLW118_20C_herm_01001_Statistics	24.3691	WT	SYP2GFP	3440000	141162
0.552035	0.49362	MP	Herm	DLW118	2021_07_22_DLW118_20C_herm_01001_Statistics	32.6631	WT	SYP2GFP	4810000	147261
0.573877	0.51831	MP	Herm	DLW118	2021_07_22_DLW118_20C_herm_01001_Statistics	32.2696	WT	SYP2GFP	4650000	144098
0.607497	0.556315	MP	Herm	DLW118	2021_07_22_DLW118_20C_herm_01001_Statistics	31.059	WT	SYP2GFP	4380000	141022
0.593256	0.540216	MP	Herm	DLW118	2021_07_22_DLW118_20C_herm_01001_Statistics	31.8069	WT	SYP2GFP	4530000	142422
0.621519	0.572165	MP	Herm	DLW118	2021_07_22_DLW118_20C_herm_01001_Statistics	36.5869	WT	SYP2GFP	5340000	145954
0.643876	0.597437	MP	Herm	DLW118	2021_07_22_DLW118_20C_herm_01001_Statistics	30.1124	WT	SYP2GFP	4280000	142134
0.666048	0.6225	MP	Herm	DLW118	2021_07_22_DLW118_20C_herm_01001_Statistics	25.4338	WT	SYP2GFP	3540000	139185
0.623159	0.574018	MP	Herm	DLW118	2021_07_22_DLW118_20C_herm_01001_Statistics	29.5651	WT	SYP2GFP	4450000	150515
0.735873	0.70143	LP	Herm	DLW118	2021_07_22_DLW118_20C_herm_01001_Statistics	34.3116	WT	SYP2GFP	4510000	131442
0.690124	0.649715	MP	Herm	DLW118	2021_07_22_DLW118_20C_herm_01001_Statistics	32.196	WT	SYP2GFP	4710000	146291
0.649978	0.604335	MP	Herm	DLW118	2021_07_22_DLW118_20C_herm_01001_Statistics	32.7116	WT	SYP2GFP	4530000	138483
0.64393	0.597499	MP	Herm	DLW118	2021_07_22_DLW118_20C_herm_01001_Statistics	36.9433	WT	SYP2GFP	5280000	142922
0.634566	0.586913	MP	Herm	DLW118	2021_07_22_DLW118_20C_herm_01001_Statistics	40.118	WT	SYP2GFP	5730000	142829
0.659634	0.61525	MP	Herm	DLW118	2021_07_22_DLW118_20C_herm_01001_Statistics	31.2618	WT	SYP2GFP	4430000	141706
0.717654	0.680836	LP	Herm	DLW118	2021_07_22_DLW118_20C_herm_01001_Statistics	35.575	WT	SYP2GFP	4960000	139424
0.673349	0.630754	MP	Herm	DLW118	2021_07_22_DLW118_20C_herm_01001_Statistics	35.8741	WT	SYP2GFP	5360000	149411
0.685453	0.644436	MP	Herm	DLW118	2021_07_22_DLW118_20C_herm_01001_Statistics	33.9289	WT	SYP2GFP	4930000	145304
0.743998	0.710615	LP	Herm	DLW118	2021_07_22_DLW118_20C_herm_01001_Statistics	29.5789	WT	SYP2GFP	4140000	139965
0.729253	0.693947	LP	Herm	DLW118	2021_07_22_DLW118_20C_herm_01001_Statistics	38.8612	WT	SYP2GFP	5820000	149764
0.671912	0.629129	MP	Herm	DLW118	2021_07_22_DLW118_20C_herm_01001_Statistics	31.9786	WT	SYP2GFP	4660000	145722
0.712864	0.675421	LP	Herm	DLW118	2021_07_22_DLW118_20C_herm_01001_Statistics	33.735	WT	SYP2GFP	4930000	146139
0.742046	0.708409	LP	Herm	DLW118	2021_07_22_DLW118_20C_herm_01001_Statistics	38.4948	WT	SYP2GFP	5900000	153267
0.754209	0.722157	LP	Herm	DLW118	2021_07_22_DLW118_20C_herm_01001_Statistics	36.3068	WT	SYP2GFP	5020000	138266
0.754209	0.722157	LP	Herm	DLW118	2021_07_22_DLW118_20C_herm_01001_Statistics	40.9064	WT	SYP2GFP	5640000	137876
0.816673	0.792767	LP	Herm	DLW118	2021_07_22_DLW118_20C_herm_01001_Statistics	36.4887	WT	SYP2GFP	4890000	134014
0.80121	0.775287	LP	Herm	DLW118	2021_07_22_DLW118_20C_herm_01001_Statistics	35.6158	WT	SYP2GFP	4800000	134772
0.778506	0.749623	LP	Herm	DLW118	2021_07_22_DLW118_20C_herm_01001_Statistics	33.0905	WT	SYP2GFP	4400000	132969
0.814047	0.789799	LP	Herm	DLW118	2021_07_22_DLW118_20C_herm_01001_Statistics	34.7356	WT	SYP2GFP	4620000	133005
0.878229	0.86235	LP	Herm	DLW118	2021_07_22_DLW118_20C_herm_01001_Statistics	34.4075	WT	SYP2GFP	4420000	128460
0.832529	0.810691	LP	Herm	DLW118	2021_07_22_DLW118_20C_herm_01001_Statistics	32.9026	WT	SYP2GFP	4400000	133728
0.844586	0.82432	LP	Herm	DLW118	2021_07_22_DLW118_20C_herm_01001_Statistics	34.491	WT	SYP2GFP	4510000	130759
0.900368	0.887376	LP	Herm	DLW118	2021_07_22_DLW118_20C_herm_01001_Statistics	31.5218	WT	SYP2GFP	4090000	129751
0.861738	0.843709	LP	Herm	DLW118	2021_07_22_DLW118_20C_herm_01001_Statistics	31.9075	WT	SYP2GFP	4260000	133511
0.787834	0.760167	LP	Herm	DLW118	2021_07_22_DLW118_20C_herm_01001_Statistics	38.7817	WT	SYP2GFP	5350000	137952
0.767625	0.737323	LP	Herm	DLW118	2021_07_22_DLW118_20C_herm_01001_Statistics	36.9387	WT	SYP2GFP	5280000	142940
0.842723	0.822214	LP	Herm	DLW118	2021_07_22_DLW118_20C_herm_01001_Statistics	37.1902	WT	SYP2GFP	4980000	133906
0.883368	0.868159	LP	Herm	DLW118	2021_07_22_DLW118_20C_herm_01001_Statistics	35.9795	WT	SYP2GFP	4790000	133131
0.972957	0.969431	LP	Herm	DLW118	2021_07_22_DLW118_20C_herm_01001_Statistics	31.4127	WT	SYP2GFP	3820000	121607
0.937278	0.929099	LP	Herm	DLW118	2021_07_22_DLW118_20C_herm_01001_Statistics	42.9103	WT	SYP2GFP	5340000	124446
0.941453	0.933818	LP	Herm	DLW118	2021_07_22_DLW118_20C_herm_01001_Statistics	15.4952	WT	SYP2GFP	2000000	129072
0.907523	0.895464	LP	Herm	DLW118	2021_07_22_DLW118_20C_herm_01001_Statistics	37.404	WT	SYP2GFP	4940000	132071
0.917338	0.906559	LP	Herm	DLW118	2021_07_22_DLW118_20C_herm_01001_Statistics	36.5228	WT	SYP2GFP	5150000	141008
0.953652	0.947609	LP	Herm	DLW118	2021_07_22_DLW118_20C_herm_01001_Statistics	18.7621	WT	SYP2GFP	2460000	131115
0.928789	0.919503	LP	Herm	DLW118	2021_07_22_DLW118_20C_herm_01001_Statistics	30.5726	WT	SYP2GFP	3930000	128546
1	1	LP	Herm	DLW118	2021_07_22_DLW118_20C_herm_01001_Statistics	27.4584	WT	SYP2GFP	3450000	125645
0.0467752	-0.0813345	TZ	Herm	DLW118	2021_07_22_DLW118_20C_herm_01002_Statistics	18.0465	WT	SYP2GFP	2260000	125232
0.110131	-0.00946398	TZ	Herm	DLW118	2021_07_22_DLW118_20C_herm_01002_Statistics	15.2985	WT	SYP2GFP	1960000	128117
0.070013	-0.0549736	TZ	Herm	DLW118	2021_07_22_DLW118_20C_herm_01002_Statistics	15.3411	WT	SYP2GFP	2000000	130369
0.111474	-0.00794078	TZ	Herm	DLW118	2021_07_22_DLW118_20C_herm_01002_Statistics	16.885	WT	SYP2GFP	2140000	126740
0.0469564	-0.0811289	TZ	Herm	DLW118	2021_07_22_DLW118_20C_herm_01002_Statistics	20.1834	WT	SYP2GFP	2410000	119405
0.0723877	-0.0522798	TZ	Herm	DLW118	2021_07_22_DLW118_20C_herm_01002_Statistics	16.0109	WT	SYP2GFP	2100000	131161
0.089161	-0.0332522	TZ	Herm	DLW118	2021_07_22_DLW118_20C_herm_01002_Statistics	19.2016	WT	SYP2GFP	2820000	146863
0.0429352	-0.0856906	TZ	Herm	DLW118	2021_07_22_DLW118_20C_herm_01002_Statistics	20.6594	WT	SYP2GFP	2430000	117622
0.110552	-0.00898603	TZ	Herm	DLW118	2021_07_22_DLW118_20C_herm_01002_Statistics	31.9887	WT	SYP2GFP	4260000	133172
0.0666054	-0.0588392	TZ	Herm	DLW118	2021_07_22_DLW118_20C_herm_01002_Statistics	16.9984	WT	SYP2GFP	2180000	128247
0.0874976	-0.0351391	TZ	Herm	DLW118	2021_07_22_DLW118_20C_herm_01002_Statistics	20.7492	WT	SYP2GFP	2840000	136873
0.0596758	-0.0667	TZ	Herm	DLW118	2021_07_22_DLW118_20C_herm_01002_Statistics	24.4563	WT	SYP2GFP	3350000	136979
0.108861	-0.0109046	TZ	Herm	DLW118	2021_07_22_DLW118_20C_herm_01002_Statistics	22.9981	WT	SYP2GFP	2950000	128271
0.255678	0.155644	EP	Herm	DLW118	2021_07_22_DLW118_20C_herm_01002_Statistics	26.8494	WT	SYP2GFP	3300000	122908
0.268351	0.17002	EP	Herm	DLW118	2021_07_22_DLW118_20C_herm_01002_Statistics	21.0632	WT	SYP2GFP	2820000	133883
0.195174	0.0870082	EP	Herm	DLW118	2021_07_22_DLW118_20C_herm_01002_Statistics	29.3498	WT	SYP2GFP	3730000	127088
0.170783	0.059339	EP	Herm	DLW118	2021_07_22_DLW118_20C_herm_01002_Statistics	9.22454	WT	SYP2GFP	1220000	132256
0.150479	0.0363062	EP	Herm	DLW118	2021_07_22_DLW118_20C_herm_01002_Statistics	24.9875	WT	SYP2GFP	3840000	153677
0.234078	0.131141	EP	Herm	DLW118	2021_07_22_DLW118_20C_herm_01002_Statistics	19.0864	WT	SYP2GFP	2740000	143558
0.255315	0.155233	EP	Herm	DLW118	2021_07_22_DLW118_20C_herm_01002_Statistics	30.0875	WT	SYP2GFP	4720000	156876
0.207493	0.100984	EP	Herm	DLW118	2021_07_22_DLW118_20C_herm_01002_Statistics	30.9556	WT	SYP2GFP	4340000	140201
0.186138	0.0767583	EP	Herm	DLW118	2021_07_22_DLW118_20C_herm_01002_Statistics	30.9575	WT	SYP2GFP	4110000	132763
0.158342	0.045226	EP	Herm	DLW118	2021_07_22_DLW118_20C_herm_01002_Statistics	26.2112	WT	SYP2GFP	3700000	141161
0.128827	0.0117445	EP	Herm	DLW118	2021_07_22_DLW118_20C_herm_01002_Statistics	27.2406	WT	SYP2GFP	3660000	134358
0.242693	0.140913	EP	Herm	DLW118	2021_07_22_DLW118_20C_herm_01002_Statistics	30.1039	WT	SYP2GFP	4180000	138852
0.217825	0.112704	EP	Herm	DLW118	2021_07_22_DLW118_20C_herm_01002_Statistics	21.2227	WT	SYP2GFP	2840000	133819
0.170294	0.0587849	EP	Herm	DLW118	2021_07_22_DLW118_20C_herm_01002_Statistics	29.1837	WT	SYP2GFP	4080000	139804
0.200977	0.0935915	EP	Herm	DLW118	2021_07_22_DLW118_20C_herm_01002_Statistics	9.93353	WT	SYP2GFP	1460000	146977
0.22473	0.120537	EP	Herm	DLW118	2021_07_22_DLW118_20C_herm_01002_Statistics	34.8353	WT	SYP2GFP	4870000	139801
0.25243	0.15196	EP	Herm	DLW118	2021_07_22_DLW118_20C_herm_01002_Statistics	31.048	WT	SYP2GFP	4650000	149768
0.134551	0.0182385	EP	Herm	DLW118	2021_07_22_DLW118_20C_herm_01002_Statistics	30.6114	WT	SYP2GFP	4110000	134264
0.199327	0.0917199	EP	Herm	DLW118	2021_07_22_DLW118_20C_herm_01002_Statistics	18.6443	WT	SYP2GFP	2620000	140526
0.208115	0.101688	EP	Herm	DLW118	2021_07_22_DLW118_20C_herm_01002_Statistics	31.7882	WT	SYP2GFP	4640000	145966
0.266226	0.167609	EP	Herm	DLW118	2021_07_22_DLW118_20C_herm_01002_Statistics	35.8769	WT	SYP2GFP	5390000	150236
0.120293	0.00206411	EP	Herm	DLW118	2021_07_22_DLW118_20C_herm_01002_Statistics	24.2179	WT	SYP2GFP	3470000	143282
0.136738	0.0207192	EP	Herm	DLW118	2021_07_22_DLW118_20C_herm_01002_Statistics	20.9107	WT	SYP2GFP	2720000	130077
0.388075	0.305835	EP	Herm	DLW118	2021_07_22_DLW118_20C_herm_01002_Statistics	30.0012	WT	SYP2GFP	4840000	161327
0.333445	0.243862	EP	Herm	DLW118	2021_07_22_DLW118_20C_herm_01002_Statistics	14.6141	WT	SYP2GFP	2150000	147118
0.30557	0.212242	EP	Herm	DLW118	2021_07_22_DLW118_20C_herm_01002_Statistics	29.8927	WT	SYP2GFP	4240000	141841
0.276115	0.178828	EP	Herm	DLW118	2021_07_22_DLW118_20C_herm_01002_Statistics	31.7873	WT	SYP2GFP	4390000	138105
0.405174	0.325231	EP	Herm	DLW118	2021_07_22_DLW118_20C_herm_01002_Statistics	34.5922	WT	SYP2GFP	5600000	161886
0.381221	0.29806	EP	Herm	DLW118	2021_07_22_DLW118_20C_herm_01002_Statistics	27.7951	WT	SYP2GFP	4540000	163338
0.324489	0.233703	EP	Herm	DLW118	2021_07_22_DLW118_20C_herm_01002_Statistics	35.1057	WT	SYP2GFP	5200000	148124
0.352332	0.265288	EP	Herm	DLW118	2021_07_22_DLW118_20C_herm_01002_Statistics	25.8243	WT	SYP2GFP	3530000	136693
0.292373	0.197271	EP	Herm	DLW118	2021_07_22_DLW118_20C_herm_01002_Statistics	22.5607	WT	SYP2GFP	3130000	138737
0.443767	0.369012	MP	Herm	DLW118	2021_07_22_DLW118_20C_herm_01002_Statistics	41.295	WT	SYP2GFP	6150000	148928
0.391571	0.309801	EP	Herm	DLW118	2021_07_22_DLW118_20C_herm_01002_Statistics	30.4473	WT	SYP2GFP	5350000	175713
0.415066	0.336453	MP	Herm	DLW118	2021_07_22_DLW118_20C_herm_01002_Statistics	32.4835	WT	SYP2GFP	5570000	171472
0.282126	0.185647	EP	Herm	DLW118	2021_07_22_DLW118_20C_herm_01002_Statistics	30.1022	WT	SYP2GFP	4350000	144508
0.339214	0.250407	EP	Herm	DLW118	2021_07_22_DLW118_20C_herm_01002_Statistics	33.0443	WT	SYP2GFP	5000000	151312
0.309168	0.216322	EP	Herm	DLW118	2021_07_22_DLW118_20C_herm_01002_Statistics	29.995	WT	SYP2GFP	4410000	147025
0.368854	0.284031	EP	Herm	DLW118	2021_07_22_DLW118_20C_herm_01002_Statistics	37.0845	WT	SYP2GFP	6090000	164220
0.395435	0.314184	EP	Herm	DLW118	2021_07_22_DLW118_20C_herm_01002_Statistics	41.2201	WT	SYP2GFP	6960000	168850
0.427378	0.350419	MP	Herm	DLW118	2021_07_22_DLW118_20C_herm_01002_Statistics	38.6164	WT	SYP2GFP	6080000	157446
0.351404	0.264235	EP	Herm	DLW118	2021_07_22_DLW118_20C_herm_01002_Statistics	37.2817	WT	SYP2GFP	5860000	157182
0.3232	0.23224	EP	Herm	DLW118	2021_07_22_DLW118_20C_herm_01002_Statistics	36.549	WT	SYP2GFP	5950000	162795
0.272834	0.175106	EP	Herm	DLW118	2021_07_22_DLW118_20C_herm_01002_Statistics	34.336	WT	SYP2GFP	5200000	151445
0.374592	0.29054	EP	Herm	DLW118	2021_07_22_DLW118_20C_herm_01002_Statistics	39.8394	WT	SYP2GFP	6840000	171689
0.418121	0.339918	MP	Herm	DLW118	2021_07_22_DLW118_20C_herm_01002_Statistics	46.4145	WT	SYP2GFP	7520000	162018
0.286771	0.190915	EP	Herm	DLW118	2021_07_22_DLW118_20C_herm_01002_Statistics	19.4005	WT	SYP2GFP	3060000	157728
0.310069	0.217345	EP	Herm	DLW118	2021_07_22_DLW118_20C_herm_01002_Statistics	31.8695	WT	SYP2GFP	5420000	170069
0.446698	0.372336	MP	Herm	DLW118	2021_07_22_DLW118_20C_herm_01002_Statistics	45.7069	WT	SYP2GFP	7350000	160807
0.392122	0.310426	EP	Herm	DLW118	2021_07_22_DLW118_20C_herm_01002_Statistics	31.1198	WT	SYP2GFP	6300000	202443
0.336338	0.247144	EP	Herm	DLW118	2021_07_22_DLW118_20C_herm_01002_Statistics	38.505	WT	SYP2GFP	6120000	158940
0.316351	0.224472	EP	Herm	DLW118	2021_07_22_DLW118_20C_herm_01002_Statistics	31.0878	WT	SYP2GFP	4750000	152793
0.298696	0.204443	EP	Herm	DLW118	2021_07_22_DLW118_20C_herm_01002_Statistics	17.7958	WT	SYP2GFP	2480000	139359
0.439641	0.364331	MP	Herm	DLW118	2021_07_22_DLW118_20C_herm_01002_Statistics	43.2277	WT	SYP2GFP	7370000	170493
0.669614	0.625211	MP	Herm	DLW118	2021_07_22_DLW118_20C_herm_01002_Statistics	37.9789	WT	SYP2GFP	5430000	142974
0.697958	0.657365	MP	Herm	DLW118	2021_07_22_DLW118_20C_herm_01002_Statistics	39.4285	WT	SYP2GFP	5540000	140508
0.651668	0.604854	MP	Herm	DLW118	2021_07_22_DLW118_20C_herm_01002_Statistics	33.1334	WT	SYP2GFP	4730000	142756
0.680448	0.637502	MP	Herm	DLW118	2021_07_22_DLW118_20C_herm_01002_Statistics	36.5431	WT	SYP2GFP	4960000	135730
0.651212	0.604336	MP	Herm	DLW118	2021_07_22_DLW118_20C_herm_01002_Statistics	42.1235	WT	SYP2GFP	5930000	140777
0.619926	0.568846	MP	Herm	DLW118	2021_07_22_DLW118_20C_herm_01002_Statistics	41.5989	WT	SYP2GFP	5950000	143033
0.685741	0.643506	MP	Herm	DLW118	2021_07_22_DLW118_20C_herm_01002_Statistics	46.5197	WT	SYP2GFP	6670000	143380
0.655765	0.609501	MP	Herm	DLW118	2021_07_22_DLW118_20C_herm_01002_Statistics	43.4337	WT	SYP2GFP	6210000	142977
0.612951	0.560934	MP	Herm	DLW118	2021_07_22_DLW118_20C_herm_01002_Statistics	55.303	WT	SYP2GFP	8320000	150444
0.692957	0.651692	MP	Herm	DLW118	2021_07_22_DLW118_20C_herm_01002_Statistics	27.0856	WT	SYP2GFP	4110000	151741
0.641453	0.593265	MP	Herm	DLW118	2021_07_22_DLW118_20C_herm_01002_Statistics	23.3408	WT	SYP2GFP	3650000	156379
0.629848	0.580101	MP	Herm	DLW118	2021_07_22_DLW118_20C_herm_01002_Statistics	23.126	WT	SYP2GFP	3500000	151345
0.674068	0.630264	MP	Herm	DLW118	2021_07_22_DLW118_20C_herm_01002_Statistics	48.1038	WT	SYP2GFP	7240000	150508
0.482514	0.412966	MP	Herm	DLW118	2021_07_22_DLW118_20C_herm_01002_Statistics	33.9827	WT	SYP2GFP	4490000	132126
0.457272	0.384331	MP	Herm	DLW118	2021_07_22_DLW118_20C_herm_01002_Statistics	34.3179	WT	SYP2GFP	5010000	145988
0.512203	0.446644	MP	Herm	DLW118	2021_07_22_DLW118_20C_herm_01002_Statistics	27.8315	WT	SYP2GFP	3720000	133661
0.53793	0.475829	MP	Herm	DLW118	2021_07_22_DLW118_20C_herm_01002_Statistics	33.0963	WT	SYP2GFP	4550000	137478
0.566156	0.507849	MP	Herm	DLW118	2021_07_22_DLW118_20C_herm_01002_Statistics	30.4778	WT	SYP2GFP	4230000	138790
0.471057	0.399969	MP	Herm	DLW118	2021_07_22_DLW118_20C_herm_01002_Statistics	23.3184	WT	SYP2GFP	3120000	133800
0.610488	0.55814	MP	Herm	DLW118	2021_07_22_DLW118_20C_herm_01002_Statistics	29.9655	WT	SYP2GFP	4270000	142497
0.525102	0.461278	MP	Herm	DLW118	2021_07_22_DLW118_20C_herm_01002_Statistics	29.6786	WT	SYP2GFP	3850000	129723
0.552498	0.492355	MP	Herm	DLW118	2021_07_22_DLW118_20C_herm_01002_Statistics	36.5641	WT	SYP2GFP	5050000	138114
0.579367	0.522835	MP	Herm	DLW118	2021_07_22_DLW118_20C_herm_01002_Statistics	35.0374	WT	SYP2GFP	4820000	137567
0.476313	0.405932	MP	Herm	DLW118	2021_07_22_DLW118_20C_herm_01002_Statistics	23.4344	WT	SYP2GFP	3150000	134418
0.45313	0.379632	MP	Herm	DLW118	2021_07_22_DLW118_20C_herm_01002_Statistics	21.1095	WT	SYP2GFP	3000000	142116
0.516319	0.451314	MP	Herm	DLW118	2021_07_22_DLW118_20C_herm_01002_Statistics	25.8179	WT	SYP2GFP	3550000	137502
0.491947	0.423666	MP	Herm	DLW118	2021_07_22_DLW118_20C_herm_01002_Statistics	27.4427	WT	SYP2GFP	3860000	140657
0.471956	0.400989	MP	Herm	DLW118	2021_07_22_DLW118_20C_herm_01002_Statistics	27.4437	WT	SYP2GFP	3900000	142109
0.541401	0.479767	MP	Herm	DLW118	2021_07_22_DLW118_20C_herm_01002_Statistics	43.8722	WT	SYP2GFP	6430000	146562
0.570006	0.512216	MP	Herm	DLW118	2021_07_22_DLW118_20C_herm_01002_Statistics	31.8712	WT	SYP2GFP	4370000	137114
0.527572	0.46408	MP	Herm	DLW118	2021_07_22_DLW118_20C_herm_01002_Statistics	37.893	WT	SYP2GFP	5920000	156229
0.4988	0.431441	MP	Herm	DLW118	2021_07_22_DLW118_20C_herm_01002_Statistics	37.7542	WT	SYP2GFP	5590000	148063
0.56091	0.501898	MP	Herm	DLW118	2021_07_22_DLW118_20C_herm_01002_Statistics	14.258	WT	SYP2GFP	2190000	153598
0.588738	0.533466	MP	Herm	DLW118	2021_07_22_DLW118_20C_herm_01002_Statistics	40.7986	WT	SYP2GFP	6090000	149270
0.557136	0.497617	MP	Herm	DLW118	2021_07_22_DLW118_20C_herm_01002_Statistics	24.8186	WT	SYP2GFP	3420000	137800
0.637347	0.588607	MP	Herm	DLW118	2021_07_22_DLW118_20C_herm_01002_Statistics	35.2076	WT	SYP2GFP	4770000	135482
0.625316	0.57496	MP	Herm	DLW118	2021_07_22_DLW118_20C_herm_01002_Statistics	33.5892	WT	SYP2GFP	4730000	140819
0.598992	0.545099	MP	Herm	DLW118	2021_07_22_DLW118_20C_herm_01002_Statistics	39.9396	WT	SYP2GFP	5340000	133702
0.541305	0.479659	MP	Herm	DLW118	2021_07_22_DLW118_20C_herm_01002_Statistics	52.7427	WT	SYP2GFP	7920000	150163
0.707873	0.668612	LP	Herm	DLW118	2021_07_22_DLW118_20C_herm_01002_Statistics	37.4481	WT	SYP2GFP	5050000	134853
0.867489	0.84968	LP	Herm	DLW118	2021_07_22_DLW118_20C_herm_01002_Statistics	52.3813	WT	SYP2GFP	7020000	134017
0.739087	0.704021	LP	Herm	DLW118	2021_07_22_DLW118_20C_herm_01002_Statistics	43.5325	WT	SYP2GFP	5810000	133464
0.777547	0.74765	LP	Herm	DLW118	2021_07_22_DLW118_20C_herm_01002_Statistics	42.7845	WT	SYP2GFP	5930000	138602
0.936107	0.92752	LP	Herm	DLW118	2021_07_22_DLW118_20C_herm_01002_Statistics	52.6434	WT	SYP2GFP	7210000	136959
0.999123	0.999005	LP	Herm	DLW118	2021_07_22_DLW118_20C_herm_01002_Statistics	21.1375	WT	SYP2GFP	2660000	125843
0.991392	0.990236	LP	Herm	DLW118	2021_07_22_DLW118_20C_herm_01002_Statistics	26.3299	WT	SYP2GFP	3550000	134828
0.814166	0.789191	LP	Herm	DLW118	2021_07_22_DLW118_20C_herm_01002_Statistics	47.5035	WT	SYP2GFP	6570000	138306
0.851169	0.831166	LP	Herm	DLW118	2021_07_22_DLW118_20C_herm_01002_Statistics	38.4125	WT	SYP2GFP	4950000	128864
0.727074	0.690393	LP	Herm	DLW118	2021_07_22_DLW118_20C_herm_01002_Statistics	39.6731	WT	SYP2GFP	5340000	134600
0.766483	0.735099	LP	Herm	DLW118	2021_07_22_DLW118_20C_herm_01002_Statistics	48.911	WT	SYP2GFP	6670000	136370
0.923002	0.912654	LP	Herm	DLW118	2021_07_22_DLW118_20C_herm_01002_Statistics	39.3793	WT	SYP2GFP	5250000	133319
0.960234	0.95489	LP	Herm	DLW118	2021_07_22_DLW118_20C_herm_01002_Statistics	43.4277	WT	SYP2GFP	5730000	131943
0.800837	0.77407	LP	Herm	DLW118	2021_07_22_DLW118_20C_herm_01002_Statistics	47.8062	WT	SYP2GFP	6760000	141404
0.719377	0.681662	LP	Herm	DLW118	2021_07_22_DLW118_20C_herm_01002_Statistics	19.8158	WT	SYP2GFP	3070000	154927
0.997558	0.997229	LP	Herm	DLW118	2021_07_22_DLW118_20C_herm_01002_Statistics	20.8511	WT	SYP2GFP	2830000	135724
0.837859	0.816067	LP	Herm	DLW118	2021_07_22_DLW118_20C_herm_01002_Statistics	49.3728	WT	SYP2GFP	6840000	138538
0.770239	0.73936	LP	Herm	DLW118	2021_07_22_DLW118_20C_herm_01002_Statistics	50.4706	WT	SYP2GFP	7310000	144837
0.878012	0.861618	LP	Herm	DLW118	2021_07_22_DLW118_20C_herm_01002_Statistics	47.7114	WT	SYP2GFP	6540000	137074
0.814289	0.78933	LP	Herm	DLW118	2021_07_22_DLW118_20C_herm_01002_Statistics	49.1079	WT	SYP2GFP	7190000	146412
0.98086	0.978287	LP	Herm	DLW118	2021_07_22_DLW118_20C_herm_01002_Statistics	39.8961	WT	SYP2GFP	5670000	142119
0.949535	0.942753	LP	Herm	DLW118	2021_07_22_DLW118_20C_herm_01002_Statistics	43.8956	WT	SYP2GFP	6120000	139422
0.911273	0.899349	LP	Herm	DLW118	2021_07_22_DLW118_20C_herm_01002_Statistics	41.4184	WT	SYP2GFP	5570000	134481
0.822188	0.798291	LP	Herm	DLW118	2021_07_22_DLW118_20C_herm_01002_Statistics	51.2489	WT	SYP2GFP	6960000	135808
0.897585	0.883821	LP	Herm	DLW118	2021_07_22_DLW118_20C_herm_01002_Statistics	51.7643	WT	SYP2GFP	7290000	140831
0.925412	0.915388	LP	Herm	DLW118	2021_07_22_DLW118_20C_herm_01002_Statistics	50.0882	WT	SYP2GFP	7180000	143347
0.973236	0.969639	LP	Herm	DLW118	2021_07_22_DLW118_20C_herm_01002_Statistics	54.1499	WT	SYP2GFP	8170000	150877
0.959722	0.954309	LP	Herm	DLW118	2021_07_22_DLW118_20C_herm_01002_Statistics	47.8554	WT	SYP2GFP	7060000	147528
1	1	LP	Herm	DLW118	2021_07_22_DLW118_20C_herm_01002_Statistics	29.4015	WT	SYP2GFP	4540000	154414
1	1	LP	Herm	DLW118	2021_07_22_DLW118_20C_herm_01002_Statistics	20.3083	WT	SYP2GFP	2680000	131966
1	1	Dip/Diak	Herm	DLW118	2021_07_22_DLW118_20C_herm_01002_Statistics	13.5988	WT	SYP2GFP	2290000	168397
0.0175757	-0.0845382	TZ	Herm	DLW118	2021_07_22_DLW118_20C_herm_01003_Statistics	12.7111	WT	SYP2GFP	1650000	129808
0.066063	-0.031011	TZ	Herm	DLW118	2021_07_22_DLW118_20C_herm_01003_Statistics	12.693	WT	SYP2GFP	1700000	133932
0.0736613	-0.022623	TZ	Herm	DLW118	2021_07_22_DLW118_20C_herm_01003_Statistics	11.2384	WT	SYP2GFP	1600000	142369
0.0634927	-0.0338485	TZ	Herm	DLW118	2021_07_22_DLW118_20C_herm_01003_Statistics	18.8116	WT	SYP2GFP	2620000	139276
0.0394257	-0.060417	TZ	Herm	DLW118	2021_07_22_DLW118_20C_herm_01003_Statistics	15.5275	WT	SYP2GFP	2070000	133312
0.0575977	-0.0403562	TZ	Herm	DLW118	2021_07_22_DLW118_20C_herm_01003_Statistics	14.6882	WT	SYP2GFP	2150000	146376
0.0354276	-0.0648307	TZ	Herm	DLW118	2021_07_22_DLW118_20C_herm_01003_Statistics	13.1217	WT	SYP2GFP	1780000	135653
0.0367752	-0.0633431	TZ	Herm	DLW118	2021_07_22_DLW118_20C_herm_01003_Statistics	13.9623	WT	SYP2GFP	1950000	139662
0.0554467	-0.0427308	TZ	Herm	DLW118	2021_07_22_DLW118_20C_herm_01003_Statistics	20.2389	WT	SYP2GFP	2660000	131430
0.0380587	-0.0619261	TZ	Herm	DLW118	2021_07_22_DLW118_20C_herm_01003_Statistics	12.4557	WT	SYP2GFP	1720000	138089
0.0180145	-0.0840538	TZ	Herm	DLW118	2021_07_22_DLW118_20C_herm_01003_Statistics	15.3146	WT	SYP2GFP	1940000	126677
0.0517699	-0.0467898	TZ	Herm	DLW118	2021_07_22_DLW118_20C_herm_01003_Statistics	15.5855	WT	SYP2GFP	1970000	126400
0.0150434	-0.0873337	TZ	Herm	DLW118	2021_07_22_DLW118_20C_herm_01003_Statistics	15.3354	WT	SYP2GFP	1950000	127157
0.053152	-0.0452641	TZ	Herm	DLW118	2021_07_22_DLW118_20C_herm_01003_Statistics	20.0253	WT	SYP2GFP	2820000	140822
0.0306114	-0.0701475	TZ	Herm	DLW118	2021_07_22_DLW118_20C_herm_01003_Statistics	16.4429	WT	SYP2GFP	2230000	135621
0.016346	-0.0858957	TZ	Herm	DLW118	2021_07_22_DLW118_20C_herm_01003_Statistics	14.6518	WT	SYP2GFP	1860000	126947
0.0618985	-0.0356085	TZ	Herm	DLW118	2021_07_22_DLW118_20C_herm_01003_Statistics	18.4505	WT	SYP2GFP	2760000	149589
0.0865173	-0.00843079	TZ	Herm	DLW118	2021_07_22_DLW118_20C_herm_01003_Statistics	12.8749	WT	SYP2GFP	1830000	142137
0.0543141	-0.0439812	TZ	Herm	DLW118	2021_07_22_DLW118_20C_herm_01003_Statistics	14.4338	WT	SYP2GFP	2110000	146185
0.0546046	-0.0436605	TZ	Herm	DLW118	2021_07_22_DLW118_20C_herm_01003_Statistics	18.5938	WT	SYP2GFP	2640000	141983
0.113082	0.020895	EP	Herm	DLW118	2021_07_22_DLW118_20C_herm_01003_Statistics	21.4763	WT	SYP2GFP	3130000	145742
0.0946151	0.000508772	EP	Herm	DLW118	2021_07_22_DLW118_20C_herm_01003_Statistics	14.0453	WT	SYP2GFP	2020000	143820
0.101885	0.00853431	EP	Herm	DLW118	2021_07_22_DLW118_20C_herm_01003_Statistics	20.0937	WT	SYP2GFP	3130000	155770
0.139559	0.0501247	EP	Herm	DLW118	2021_07_22_DLW118_20C_herm_01003_Statistics	24.1189	WT	SYP2GFP	3520000	145944
0.124869	0.0339067	EP	Herm	DLW118	2021_07_22_DLW118_20C_herm_01003_Statistics	19.166	WT	SYP2GFP	3010000	157049
0.12702	0.0362818	EP	Herm	DLW118	2021_07_22_DLW118_20C_herm_01003_Statistics	24.7214	WT	SYP2GFP	3820000	154522
0.109661	0.0171187	EP	Herm	DLW118	2021_07_22_DLW118_20C_herm_01003_Statistics	18.662	WT	SYP2GFP	2710000	145215
0.144515	0.0555949	EP	Herm	DLW118	2021_07_22_DLW118_20C_herm_01003_Statistics	23.5961	WT	SYP2GFP	3810000	161467
0.161085	0.0738874	EP	Herm	DLW118	2021_07_22_DLW118_20C_herm_01003_Statistics	20.8365	WT	SYP2GFP	3100000	148777
0.167903	0.0814143	EP	Herm	DLW118	2021_07_22_DLW118_20C_herm_01003_Statistics	32.3062	WT	SYP2GFP	4520000	139911
0.192832	0.108934	EP	Herm	DLW118	2021_07_22_DLW118_20C_herm_01003_Statistics	13.8032	WT	SYP2GFP	1780000	128956
0.172463	0.0864487	EP	Herm	DLW118	2021_07_22_DLW118_20C_herm_01003_Statistics	30.3881	WT	SYP2GFP	4690000	154337
0.18241	0.0974286	EP	Herm	DLW118	2021_07_22_DLW118_20C_herm_01003_Statistics	27.6125	WT	SYP2GFP	4210000	152467
0.192816	0.108916	EP	Herm	DLW118	2021_07_22_DLW118_20C_herm_01003_Statistics	29.171	WT	SYP2GFP	4280000	146721
0.219597	0.138481	EP	Herm	DLW118	2021_07_22_DLW118_20C_herm_01003_Statistics	28.2199	WT	SYP2GFP	3920000	138909
0.201598	0.118611	EP	Herm	DLW118	2021_07_22_DLW118_20C_herm_01003_Statistics	18.2205	WT	SYP2GFP	2500000	137208
0.167251	0.0806942	EP	Herm	DLW118	2021_07_22_DLW118_20C_herm_01003_Statistics	21.8907	WT	SYP2GFP	3380000	154403
0.199814	0.116643	EP	Herm	DLW118	2021_07_22_DLW118_20C_herm_01003_Statistics	26.6114	WT	SYP2GFP	4130000	155197
0.20946	0.127291	EP	Herm	DLW118	2021_07_22_DLW118_20C_herm_01003_Statistics	29.4963	WT	SYP2GFP	4340000	147137
0.222677	0.141882	EP	Herm	DLW118	2021_07_22_DLW118_20C_herm_01003_Statistics	28.4724	WT	SYP2GFP	4180000	146809
0.19424	0.110489	EP	Herm	DLW118	2021_07_22_DLW118_20C_herm_01003_Statistics	30.7051	WT	SYP2GFP	4800000	156326
0.229655	0.149585	EP	Herm	DLW118	2021_07_22_DLW118_20C_herm_01003_Statistics	25.84	WT	SYP2GFP	3740000	144737
0.1809	0.0957624	EP	Herm	DLW118	2021_07_22_DLW118_20C_herm_01003_Statistics	24.1553	WT	SYP2GFP	3710000	153589
0.252531	0.174838	EP	Herm	DLW118	2021_07_22_DLW118_20C_herm_01003_Statistics	27.9545	WT	SYP2GFP	4090000	146309
0.236223	0.156836	EP	Herm	DLW118	2021_07_22_DLW118_20C_herm_01003_Statistics	25.1092	WT	SYP2GFP	3780000	150542
0.222847	0.142069	EP	Herm	DLW118	2021_07_22_DLW118_20C_herm_01003_Statistics	30.4114	WT	SYP2GFP	4720000	155205
0.259156	0.182152	EP	Herm	DLW118	2021_07_22_DLW118_20C_herm_01003_Statistics	25.7278	WT	SYP2GFP	3870000	150421
0.263184	0.186599	EP	Herm	DLW118	2021_07_22_DLW118_20C_herm_01003_Statistics	21.4065	WT	SYP2GFP	3320000	155093
0.249179	0.171138	EP	Herm	DLW118	2021_07_22_DLW118_20C_herm_01003_Statistics	29.2696	WT	SYP2GFP	4380000	149643
0.270399	0.194563	EP	Herm	DLW118	2021_07_22_DLW118_20C_herm_01003_Statistics	24.0454	WT	SYP2GFP	3480000	144726
0.279401	0.204501	EP	Herm	DLW118	2021_07_22_DLW118_20C_herm_01003_Statistics	23.4001	WT	SYP2GFP	3380000	144444
0.286296	0.212113	EP	Herm	DLW118	2021_07_22_DLW118_20C_herm_01003_Statistics	28.6098	WT	SYP2GFP	4370000	152745
0.281408	0.206717	EP	Herm	DLW118	2021_07_22_DLW118_20C_herm_01003_Statistics	22.6294	WT	SYP2GFP	3460000	152898
0.278567	0.203581	EP	Herm	DLW118	2021_07_22_DLW118_20C_herm_01003_Statistics	28.3745	WT	SYP2GFP	4360000	153659
0.299483	0.22667	EP	Herm	DLW118	2021_07_22_DLW118_20C_herm_01003_Statistics	24.193	WT	SYP2GFP	3600000	148803
0.307111	0.235092	EP	Herm	DLW118	2021_07_22_DLW118_20C_herm_01003_Statistics	24.1038	WT	SYP2GFP	3550000	147280
0.275318	0.199994	EP	Herm	DLW118	2021_07_22_DLW118_20C_herm_01003_Statistics	28.2295	WT	SYP2GFP	4310000	152677
0.357315	0.290514	EP	Herm	DLW118	2021_07_22_DLW118_20C_herm_01003_Statistics	33.5469	WT	SYP2GFP	5080000	151430
0.33682	0.267888	EP	Herm	DLW118	2021_07_22_DLW118_20C_herm_01003_Statistics	31.4812	WT	SYP2GFP	4760000	151201
0.354208	0.287084	EP	Herm	DLW118	2021_07_22_DLW118_20C_herm_01003_Statistics	34.2274	WT	SYP2GFP	5540000	161859
0.427746	0.368266	MP	Herm	DLW118	2021_07_22_DLW118_20C_herm_01003_Statistics	23.6821	WT	SYP2GFP	3430000	144835
0.392463	0.329316	EP	Herm	DLW118	2021_07_22_DLW118_20C_herm_01003_Statistics	24.8648	WT	SYP2GFP	3780000	152022
0.3617	0.295355	EP	Herm	DLW118	2021_07_22_DLW118_20C_herm_01003_Statistics	33.8067	WT	SYP2GFP	5140000	152041
0.407207	0.345591	MP	Herm	DLW118	2021_07_22_DLW118_20C_herm_01003_Statistics	36.9856	WT	SYP2GFP	5570000	150599
0.373707	0.308609	EP	Herm	DLW118	2021_07_22_DLW118_20C_herm_01003_Statistics	31.2806	WT	SYP2GFP	4640000	148335
0.33462	0.26546	EP	Herm	DLW118	2021_07_22_DLW118_20C_herm_01003_Statistics	33.0394	WT	SYP2GFP	5290000	160112
0.374875	0.309899	EP	Herm	DLW118	2021_07_22_DLW118_20C_herm_01003_Statistics	47.4912	WT	SYP2GFP	6780000	142763
0.435137	0.376425	MP	Herm	DLW118	2021_07_22_DLW118_20C_herm_01003_Statistics	33.2964	WT	SYP2GFP	5950000	178698
0.367229	0.301458	EP	Herm	DLW118	2021_07_22_DLW118_20C_herm_01003_Statistics	16.4414	WT	SYP2GFP	2560000	155705
0.355871	0.28892	EP	Herm	DLW118	2021_07_22_DLW118_20C_herm_01003_Statistics	15.8928	WT	SYP2GFP	2470000	155416
0.395819	0.33302	EP	Herm	DLW118	2021_07_22_DLW118_20C_herm_01003_Statistics	28.9073	WT	SYP2GFP	4450000	153940
0.407471	0.345883	MP	Herm	DLW118	2021_07_22_DLW118_20C_herm_01003_Statistics	38.8537	WT	SYP2GFP	6090000	156742
0.383272	0.319169	EP	Herm	DLW118	2021_07_22_DLW118_20C_herm_01003_Statistics	33.5248	WT	SYP2GFP	5280000	157495
0.419194	0.358825	MP	Herm	DLW118	2021_07_22_DLW118_20C_herm_01003_Statistics	36.4006	WT	SYP2GFP	6160000	169228
0.435674	0.377017	MP	Herm	DLW118	2021_07_22_DLW118_20C_herm_01003_Statistics	35.0215	WT	SYP2GFP	5950000	169896
0.427951	0.368492	MP	Herm	DLW118	2021_07_22_DLW118_20C_herm_01003_Statistics	35.4811	WT	SYP2GFP	5590000	157549
0.412243	0.351151	MP	Herm	DLW118	2021_07_22_DLW118_20C_herm_01003_Statistics	30.8312	WT	SYP2GFP	4570000	148226
0.450685	0.393589	MP	Herm	DLW118	2021_07_22_DLW118_20C_herm_01003_Statistics	28.7339	WT	SYP2GFP	3970000	138164
0.443843	0.386035	MP	Herm	DLW118	2021_07_22_DLW118_20C_herm_01003_Statistics	40.788	WT	SYP2GFP	6720000	164754
0.448481	0.391155	MP	Herm	DLW118	2021_07_22_DLW118_20C_herm_01003_Statistics	28.3552	WT	SYP2GFP	3810000	134367
0.458535	0.402254	MP	Herm	DLW118	2021_07_22_DLW118_20C_herm_01003_Statistics	33.9361	WT	SYP2GFP	5100000	150282
0.467563	0.412221	MP	Herm	DLW118	2021_07_22_DLW118_20C_herm_01003_Statistics	20.5295	WT	SYP2GFP	2830000	137850
0.479001	0.424848	MP	Herm	DLW118	2021_07_22_DLW118_20C_herm_01003_Statistics	15.1718	WT	SYP2GFP	2130000	140392
0.49163	0.43879	MP	Herm	DLW118	2021_07_22_DLW118_20C_herm_01003_Statistics	14.5153	WT	SYP2GFP	2040000	140541
0.494648	0.442122	MP	Herm	DLW118	2021_07_22_DLW118_20C_herm_01003_Statistics	26.801	WT	SYP2GFP	3750000	139920
0.521822	0.47212	MP	Herm	DLW118	2021_07_22_DLW118_20C_herm_01003_Statistics	22.2046	WT	SYP2GFP	2920000	131504
0.504329	0.452808	MP	Herm	DLW118	2021_07_22_DLW118_20C_herm_01003_Statistics	29.718	WT	SYP2GFP	4180000	140655
0.528905	0.479939	MP	Herm	DLW118	2021_07_22_DLW118_20C_herm_01003_Statistics	23.627	WT	SYP2GFP	3150000	133322
0.520353	0.470498	MP	Herm	DLW118	2021_07_22_DLW118_20C_herm_01003_Statistics	27.6622	WT	SYP2GFP	3850000	139179
0.55267	0.506175	MP	Herm	DLW118	2021_07_22_DLW118_20C_herm_01003_Statistics	25.2755	WT	SYP2GFP	3470000	137287
0.537047	0.488927	MP	Herm	DLW118	2021_07_22_DLW118_20C_herm_01003_Statistics	23.7623	WT	SYP2GFP	3320000	139717
0.572418	0.527975	MP	Herm	DLW118	2021_07_22_DLW118_20C_herm_01003_Statistics	28.5041	WT	SYP2GFP	3880000	136121
0.590444	0.547874	MP	Herm	DLW118	2021_07_22_DLW118_20C_herm_01003_Statistics	22.0379	WT	SYP2GFP	3030000	137490
0.608358	0.567651	MP	Herm	DLW118	2021_07_22_DLW118_20C_herm_01003_Statistics	29.7099	WT	SYP2GFP	3990000	134299
0.6201	0.580613	MP	Herm	DLW118	2021_07_22_DLW118_20C_herm_01003_Statistics	26.9361	WT	SYP2GFP	3790000	140703
0.657535	0.621939	MP	Herm	DLW118	2021_07_22_DLW118_20C_herm_01003_Statistics	28.9962	WT	SYP2GFP	3860000	133121
0.604062	0.562908	MP	Herm	DLW118	2021_07_22_DLW118_20C_herm_01003_Statistics	33.4323	WT	SYP2GFP	4720000	141181
0.639166	0.60166	MP	Herm	DLW118	2021_07_22_DLW118_20C_herm_01003_Statistics	32.6094	WT	SYP2GFP	4530000	138917
0.652704	0.616605	MP	Herm	DLW118	2021_07_22_DLW118_20C_herm_01003_Statistics	33.6737	WT	SYP2GFP	4810000	142841
0.6284	0.589775	MP	Herm	DLW118	2021_07_22_DLW118_20C_herm_01003_Statistics	35.6713	WT	SYP2GFP	5020000	140729
0.655057	0.619204	MP	Herm	DLW118	2021_07_22_DLW118_20C_herm_01003_Statistics	36.1981	WT	SYP2GFP	5190000	143378
0.641999	0.604788	MP	Herm	DLW118	2021_07_22_DLW118_20C_herm_01003_Statistics	16.2188	WT	SYP2GFP	2290000	141194
0.628579	0.589973	MP	Herm	DLW118	2021_07_22_DLW118_20C_herm_01003_Statistics	12.7668	WT	SYP2GFP	1780000	139424
0.673268	0.639307	MP	Herm	DLW118	2021_07_22_DLW118_20C_herm_01003_Statistics	36.7718	WT	SYP2GFP	5340000	145220
0.7703	0.746425	LP	Herm	DLW118	2021_07_22_DLW118_20C_herm_01003_Statistics	25.6359	WT	SYP2GFP	3520000	137307
0.692556	0.6606	MP	Herm	DLW118	2021_07_22_DLW118_20C_herm_01003_Statistics	12.4689	WT	SYP2GFP	1700000	136339
0.740234	0.713233	LP	Herm	DLW118	2021_07_22_DLW118_20C_herm_01003_Statistics	35.1187	WT	SYP2GFP	4720000	134401
0.751744	0.72594	LP	Herm	DLW118	2021_07_22_DLW118_20C_herm_01003_Statistics	29.7317	WT	SYP2GFP	4110000	138236
0.698482	0.667142	LP	Herm	DLW118	2021_07_22_DLW118_20C_herm_01003_Statistics	18.9606	WT	SYP2GFP	2630000	138709
0.786283	0.764069	LP	Herm	DLW118	2021_07_22_DLW118_20C_herm_01003_Statistics	32.0543	WT	SYP2GFP	4520000	141011
0.706262	0.67573	LP	Herm	DLW118	2021_07_22_DLW118_20C_herm_01003_Statistics	44.019	WT	SYP2GFP	6650000	151071
0.729616	0.701513	LP	Herm	DLW118	2021_07_22_DLW118_20C_herm_01003_Statistics	36.7802	WT	SYP2GFP	5130000	139477
0.769477	0.745516	LP	Herm	DLW118	2021_07_22_DLW118_20C_herm_01003_Statistics	39.4015	WT	SYP2GFP	5530000	140350
0.719303	0.690127	LP	Herm	DLW118	2021_07_22_DLW118_20C_herm_01003_Statistics	37.6946	WT	SYP2GFP	5330000	141400
0.789178	0.767265	LP	Herm	DLW118	2021_07_22_DLW118_20C_herm_01003_Statistics	43.3637	WT	SYP2GFP	6190000	142746
0.804271	0.783927	LP	Herm	DLW118	2021_07_22_DLW118_20C_herm_01003_Statistics	34.7892	WT	SYP2GFP	5020000	144298
0.865733	0.851777	LP	Herm	DLW118	2021_07_22_DLW118_20C_herm_01003_Statistics	33.8416	WT	SYP2GFP	4970000	146861
0.826895	0.808903	LP	Herm	DLW118	2021_07_22_DLW118_20C_herm_01003_Statistics	12.7107	WT	SYP2GFP	1730000	136106
0.814172	0.794857	LP	Herm	DLW118	2021_07_22_DLW118_20C_herm_01003_Statistics	18.5648	WT	SYP2GFP	2620000	141127
0.860175	0.845642	LP	Herm	DLW118	2021_07_22_DLW118_20C_herm_01003_Statistics	16.9382	WT	SYP2GFP	2420000	142872
0.800404	0.779657	LP	Herm	DLW118	2021_07_22_DLW118_20C_herm_01003_Statistics	18.1861	WT	SYP2GFP	2590000	142416
0.847925	0.832118	LP	Herm	DLW118	2021_07_22_DLW118_20C_herm_01003_Statistics	15.434	WT	SYP2GFP	2160000	139951
0.892009	0.880784	LP	Herm	DLW118	2021_07_22_DLW118_20C_herm_01003_Statistics	31.7429	WT	SYP2GFP	4440000	139874
0.813847	0.794498	LP	Herm	DLW118	2021_07_22_DLW118_20C_herm_01003_Statistics	22.7585	WT	SYP2GFP	3240000	142364
0.884046	0.871994	LP	Herm	DLW118	2021_07_22_DLW118_20C_herm_01003_Statistics	29.8363	WT	SYP2GFP	4030000	135070
0.802126	0.781559	LP	Herm	DLW118	2021_07_22_DLW118_20C_herm_01003_Statistics	38.3954	WT	SYP2GFP	5420000	141163
0.936553	0.929958	LP	Herm	DLW118	2021_07_22_DLW118_20C_herm_01003_Statistics	31.9288	WT	SYP2GFP	4170000	130603
0.960237	0.956104	LP	Herm	DLW118	2021_07_22_DLW118_20C_herm_01003_Statistics	38.1604	WT	SYP2GFP	5400000	141508
0.89592	0.885102	LP	Herm	DLW118	2021_07_22_DLW118_20C_herm_01003_Statistics	46.8125	WT	SYP2GFP	6300000	134579
0.918174	0.909669	LP	Herm	DLW118	2021_07_22_DLW118_20C_herm_01003_Statistics	38.9104	WT	SYP2GFP	5550000	142635
0.841228	0.824725	LP	Herm	DLW118	2021_07_22_DLW118_20C_herm_01003_Statistics	37.1977	WT	SYP2GFP	4940000	132804
0.944388	0.938607	LP	Herm	DLW118	2021_07_22_DLW118_20C_herm_01003_Statistics	32.5138	WT	SYP2GFP	4260000	131021
0.881883	0.869606	LP	Herm	DLW118	2021_07_22_DLW118_20C_herm_01003_Statistics	41.5823	WT	SYP2GFP	5460000	131306
0.97067	0.967621	LP	Herm	DLW118	2021_07_22_DLW118_20C_herm_01003_Statistics	37.1489	WT	SYP2GFP	4920000	132440
0.986438	0.985029	LP	Herm	DLW118	2021_07_22_DLW118_20C_herm_01003_Statistics	36.961	WT	SYP2GFP	5100000	137983
0.161233	-0.0134924	TZ	Herm	DLW118	2021_07_22_DLW118_20C_herm_01004_Statistics	17.7702	WT	SYP2GFP	2440000	137309
0.124714	-0.0576191	TZ	Herm	DLW118	2021_07_22_DLW118_20C_herm_01004_Statistics	24.0288	WT	SYP2GFP	3050000	126931
0.15659	-0.019103	TZ	Herm	DLW118	2021_07_22_DLW118_20C_herm_01004_Statistics	18.075	WT	SYP2GFP	2670000	147718
0.130447	-0.0506917	TZ	Herm	DLW118	2021_07_22_DLW118_20C_herm_01004_Statistics	19.2796	WT	SYP2GFP	2600000	134858
0.100633	-0.0867161	TZ	Herm	DLW118	2021_07_22_DLW118_20C_herm_01004_Statistics	23.028	WT	SYP2GFP	3010000	130710
0.13206	-0.0487426	TZ	Herm	DLW118	2021_07_22_DLW118_20C_herm_01004_Statistics	27.4163	WT	SYP2GFP	3860000	140792
0.131844	-0.0490045	TZ	Herm	DLW118	2021_07_22_DLW118_20C_herm_01004_Statistics	28.3145	WT	SYP2GFP	3910000	138092
0.144025	-0.0342848	TZ	Herm	DLW118	2021_07_22_DLW118_20C_herm_01004_Statistics	30.15	WT	SYP2GFP	4030000	133665
0.105828	-0.0804399	TZ	Herm	DLW118	2021_07_22_DLW118_20C_herm_01004_Statistics	24.7138	WT	SYP2GFP	3470000	140407
0.128937	-0.052516	TZ	Herm	DLW118	2021_07_22_DLW118_20C_herm_01004_Statistics	16.6601	WT	SYP2GFP	2240000	134453
0.160565	-0.0143003	TZ	Herm	DLW118	2021_07_22_DLW118_20C_herm_01004_Statistics	28.4075	WT	SYP2GFP	4030000	141864
0.0576486	-0.138655	TZ	Herm	DLW118	2021_07_22_DLW118_20C_herm_01004_Statistics	24.4923	WT	SYP2GFP	3340000	136369
0.0978677	-0.0900579	TZ	Herm	DLW118	2021_07_22_DLW118_20C_herm_01004_Statistics	26.9189	WT	SYP2GFP	3710000	137821
0.0770401	-0.115224	TZ	Herm	DLW118	2021_07_22_DLW118_20C_herm_01004_Statistics	22.0572	WT	SYP2GFP	3190000	144624
0.0576889	-0.138606	TZ	Herm	DLW118	2021_07_22_DLW118_20C_herm_01004_Statistics	22.4738	WT	SYP2GFP	2620000	116580
0.0769634	-0.115317	TZ	Herm	DLW118	2021_07_22_DLW118_20C_herm_01004_Statistics	25.8514	WT	SYP2GFP	3680000	142352
0.0687954	-0.125186	TZ	Herm	DLW118	2021_07_22_DLW118_20C_herm_01004_Statistics	18.5996	WT	SYP2GFP	2560000	137637
0.0501423	-0.147725	TZ	Herm	DLW118	2021_07_22_DLW118_20C_herm_01004_Statistics	18.2546	WT	SYP2GFP	2650000	145169
0.0837637	-0.1071	TZ	Herm	DLW118	2021_07_22_DLW118_20C_herm_01004_Statistics	29.1373	WT	SYP2GFP	3970000	136251
0.072234	-0.121031	TZ	Herm	DLW118	2021_07_22_DLW118_20C_herm_01004_Statistics	18.5511	WT	SYP2GFP	2420000	130450
0.0726558	-0.120522	TZ	Herm	DLW118	2021_07_22_DLW118_20C_herm_01004_Statistics	19.4324	WT	SYP2GFP	2790000	143575
0.0478876	-0.15045	TZ	Herm	DLW118	2021_07_22_DLW118_20C_herm_01004_Statistics	16.736	WT	SYP2GFP	2170000	129661
0.027838	-0.174676	TZ	Herm	DLW118	2021_07_22_DLW118_20C_herm_01004_Statistics	19.4818	WT	SYP2GFP	2790000	143211
0.0429089	-0.156465	TZ	Herm	DLW118	2021_07_22_DLW118_20C_herm_01004_Statistics	17.4421	WT	SYP2GFP	2250000	128998
0.0175026	-0.187164	TZ	Herm	DLW118	2021_07_22_DLW118_20C_herm_01004_Statistics	20.6071	WT	SYP2GFP	2700000	131023
0.365619	0.233469	EP	Herm	DLW118	2021_07_22_DLW118_20C_herm_01004_Statistics	30.5017	WT	SYP2GFP	4650000	152451
0.321172	0.179764	EP	Herm	DLW118	2021_07_22_DLW118_20C_herm_01004_Statistics	32.7382	WT	SYP2GFP	5470000	167083
0.343807	0.207114	EP	Herm	DLW118	2021_07_22_DLW118_20C_herm_01004_Statistics	39.416	WT	SYP2GFP	6450000	163639
0.357594	0.223773	EP	Herm	DLW118	2021_07_22_DLW118_20C_herm_01004_Statistics	30.9116	WT	SYP2GFP	5100000	164987
0.336082	0.197779	EP	Herm	DLW118	2021_07_22_DLW118_20C_herm_01004_Statistics	35.4384	WT	SYP2GFP	5420000	152941
0.326393	0.186073	EP	Herm	DLW118	2021_07_22_DLW118_20C_herm_01004_Statistics	31.1931	WT	SYP2GFP	4670000	149713
0.274642	0.123541	EP	Herm	DLW118	2021_07_22_DLW118_20C_herm_01004_Statistics	36.3937	WT	SYP2GFP	5440000	149476
0.309656	0.165848	EP	Herm	DLW118	2021_07_22_DLW118_20C_herm_01004_Statistics	33.9372	WT	SYP2GFP	5280000	155581
0.343279	0.206476	EP	Herm	DLW118	2021_07_22_DLW118_20C_herm_01004_Statistics	31.5835	WT	SYP2GFP	4590000	145329
0.360172	0.226888	EP	Herm	DLW118	2021_07_22_DLW118_20C_herm_01004_Statistics	29.2076	WT	SYP2GFP	4190000	143456
0.321933	0.180683	EP	Herm	DLW118	2021_07_22_DLW118_20C_herm_01004_Statistics	35.0479	WT	SYP2GFP	5770000	164632
0.309338	0.165465	EP	Herm	DLW118	2021_07_22_DLW118_20C_herm_01004_Statistics	31.7572	WT	SYP2GFP	4850000	152721
0.339203	0.20155	EP	Herm	DLW118	2021_07_22_DLW118_20C_herm_01004_Statistics	25.3088	WT	SYP2GFP	4160000	164370
0.351051	0.215866	EP	Herm	DLW118	2021_07_22_DLW118_20C_herm_01004_Statistics	31.7996	WT	SYP2GFP	5300000	166669
0.252172	0.0963896	EP	Herm	DLW118	2021_07_22_DLW118_20C_herm_01004_Statistics	34.5909	WT	SYP2GFP	5290000	152930
0.27151	0.119757	EP	Herm	DLW118	2021_07_22_DLW118_20C_herm_01004_Statistics	33.1944	WT	SYP2GFP	5060000	152435
0.287737	0.139364	EP	Herm	DLW118	2021_07_22_DLW118_20C_herm_01004_Statistics	31.2902	WT	SYP2GFP	4570000	146052
0.238473	0.0798374	EP	Herm	DLW118	2021_07_22_DLW118_20C_herm_01004_Statistics	36.5064	WT	SYP2GFP	5740000	157233
0.259305	0.105008	EP	Herm	DLW118	2021_07_22_DLW118_20C_herm_01004_Statistics	33.1841	WT	SYP2GFP	5400000	162729
0.297971	0.151729	EP	Herm	DLW118	2021_07_22_DLW118_20C_herm_01004_Statistics	23.8314	WT	SYP2GFP	3220000	135116
0.280612	0.130754	EP	Herm	DLW118	2021_07_22_DLW118_20C_herm_01004_Statistics	37.0054	WT	SYP2GFP	5730000	154842
0.312708	0.169537	EP	Herm	DLW118	2021_07_22_DLW118_20C_herm_01004_Statistics	29.1234	WT	SYP2GFP	4410000	151425
0.30317	0.158011	EP	Herm	DLW118	2021_07_22_DLW118_20C_herm_01004_Statistics	34.3881	WT	SYP2GFP	5270000	153251
0.28965	0.141676	EP	Herm	DLW118	2021_07_22_DLW118_20C_herm_01004_Statistics	34.1662	WT	SYP2GFP	5280000	154539
0.226308	0.0651386	EP	Herm	DLW118	2021_07_22_DLW118_20C_herm_01004_Statistics	21.1023	WT	SYP2GFP	3050000	144534
0.214421	0.0507747	EP	Herm	DLW118	2021_07_22_DLW118_20C_herm_01004_Statistics	16.5364	WT	SYP2GFP	2640000	159648
0.241285	0.0832347	EP	Herm	DLW118	2021_07_22_DLW118_20C_herm_01004_Statistics	31.93	WT	SYP2GFP	4350000	136236
0.202616	0.0365106	EP	Herm	DLW118	2021_07_22_DLW118_20C_herm_01004_Statistics	32.686	WT	SYP2GFP	5110000	156336
0.179724	0.00885042	EP	Herm	DLW118	2021_07_22_DLW118_20C_herm_01004_Statistics	26.6314	WT	SYP2GFP	3360000	126167
0.224503	0.0629576	EP	Herm	DLW118	2021_07_22_DLW118_20C_herm_01004_Statistics	23.3652	WT	SYP2GFP	3560000	152363
0.243575	0.0860019	EP	Herm	DLW118	2021_07_22_DLW118_20C_herm_01004_Statistics	22.2703	WT	SYP2GFP	3230000	145036
0.257043	0.102276	EP	Herm	DLW118	2021_07_22_DLW118_20C_herm_01004_Statistics	22.3492	WT	SYP2GFP	2970000	132891
0.271154	0.119326	EP	Herm	DLW118	2021_07_22_DLW118_20C_herm_01004_Statistics	31.0759	WT	SYP2GFP	4400000	141589
0.231068	0.0708894	EP	Herm	DLW118	2021_07_22_DLW118_20C_herm_01004_Statistics	33.6151	WT	SYP2GFP	5580000	165997
0.186003	0.0164375	EP	Herm	DLW118	2021_07_22_DLW118_20C_herm_01004_Statistics	20.0167	WT	SYP2GFP	2870000	143380
0.211585	0.0473483	EP	Herm	DLW118	2021_07_22_DLW118_20C_herm_01004_Statistics	16.9679	WT	SYP2GFP	2320000	136729
0.197377	0.0301801	EP	Herm	DLW118	2021_07_22_DLW118_20C_herm_01004_Statistics	27.9978	WT	SYP2GFP	4130000	147512
0.181188	0.0106188	EP	Herm	DLW118	2021_07_22_DLW118_20C_herm_01004_Statistics	30.2308	WT	SYP2GFP	4240000	140254
0.178174	0.00697738	EP	Herm	DLW118	2021_07_22_DLW118_20C_herm_01004_Statistics	29.0986	WT	SYP2GFP	3900000	134027
0.19807	0.0310172	EP	Herm	DLW118	2021_07_22_DLW118_20C_herm_01004_Statistics	27.2703	WT	SYP2GFP	3730000	136779
0.172884	0.000584871	EP	Herm	DLW118	2021_07_22_DLW118_20C_herm_01004_Statistics	22.1891	WT	SYP2GFP	3320000	149623
0.194581	0.026802	EP	Herm	DLW118	2021_07_22_DLW118_20C_herm_01004_Statistics	21.1337	WT	SYP2GFP	2870000	135802
0.473013	0.363235	MP	Herm	DLW118	2021_07_22_DLW118_20C_herm_01004_Statistics	38.1677	WT	SYP2GFP	5690000	149079
0.466376	0.355216	MP	Herm	DLW118	2021_07_22_DLW118_20C_herm_01004_Statistics	28.6757	WT	SYP2GFP	4360000	152045
0.501335	0.397457	MP	Herm	DLW118	2021_07_22_DLW118_20C_herm_01004_Statistics	30.6323	WT	SYP2GFP	4270000	139395
0.501858	0.398089	MP	Herm	DLW118	2021_07_22_DLW118_20C_herm_01004_Statistics	22.0956	WT	SYP2GFP	2980000	134868
0.498477	0.394004	MP	Herm	DLW118	2021_07_22_DLW118_20C_herm_01004_Statistics	47.2629	WT	SYP2GFP	8030000	169901
0.4082	0.28492	EP	Herm	DLW118	2021_07_22_DLW118_20C_herm_01004_Statistics	27.0627	WT	SYP2GFP	4380000	161846
0.445328	0.329782	EP	Herm	DLW118	2021_07_22_DLW118_20C_herm_01004_Statistics	28.6307	WT	SYP2GFP	4110000	143552
0.475746	0.366537	MP	Herm	DLW118	2021_07_22_DLW118_20C_herm_01004_Statistics	23.3786	WT	SYP2GFP	2990000	127895
0.474618	0.365175	MP	Herm	DLW118	2021_07_22_DLW118_20C_herm_01004_Statistics	34.1358	WT	SYP2GFP	4740000	138857
0.403677	0.279455	EP	Herm	DLW118	2021_07_22_DLW118_20C_herm_01004_Statistics	34.0292	WT	SYP2GFP	5300000	155749
0.383085	0.254574	EP	Herm	DLW118	2021_07_22_DLW118_20C_herm_01004_Statistics	35.0621	WT	SYP2GFP	5830000	166276
0.420662	0.299979	EP	Herm	DLW118	2021_07_22_DLW118_20C_herm_01004_Statistics	47.6287	WT	SYP2GFP	8440000	177204
0.406893	0.283342	EP	Herm	DLW118	2021_07_22_DLW118_20C_herm_01004_Statistics	26.4511	WT	SYP2GFP	4240000	160296
0.416959	0.295504	EP	Herm	DLW118	2021_07_22_DLW118_20C_herm_01004_Statistics	36.4914	WT	SYP2GFP	5700000	156201
0.375601	0.245531	EP	Herm	DLW118	2021_07_22_DLW118_20C_herm_01004_Statistics	29.2243	WT	SYP2GFP	4370000	149533
0.439858	0.323173	EP	Herm	DLW118	2021_07_22_DLW118_20C_herm_01004_Statistics	22.9222	WT	SYP2GFP	2990000	130441
0.416308	0.294718	EP	Herm	DLW118	2021_07_22_DLW118_20C_herm_01004_Statistics	38.8967	WT	SYP2GFP	6370000	163767
0.37291	0.242279	EP	Herm	DLW118	2021_07_22_DLW118_20C_herm_01004_Statistics	36.5085	WT	SYP2GFP	6360000	174206
0.383695	0.255311	EP	Herm	DLW118	2021_07_22_DLW118_20C_herm_01004_Statistics	32.84	WT	SYP2GFP	5020000	152862
0.371129	0.240128	EP	Herm	DLW118	2021_07_22_DLW118_20C_herm_01004_Statistics	31.2453	WT	SYP2GFP	5290000	169305
0.392138	0.265513	EP	Herm	DLW118	2021_07_22_DLW118_20C_herm_01004_Statistics	31.5797	WT	SYP2GFP	4910000	155480
0.38244	0.253794	EP	Herm	DLW118	2021_07_22_DLW118_20C_herm_01004_Statistics	19.8993	WT	SYP2GFP	2910000	146236
0.495522	0.390433	MP	Herm	DLW118	2021_07_22_DLW118_20C_herm_01004_Statistics	25.5413	WT	SYP2GFP	3360000	131552
0.633917	0.557658	MP	Herm	DLW118	2021_07_22_DLW118_20C_herm_01004_Statistics	40.0352	WT	SYP2GFP	6180000	154364
0.635176	0.559178	MP	Herm	DLW118	2021_07_22_DLW118_20C_herm_01004_Statistics	39.2196	WT	SYP2GFP	5520000	140746
0.616021	0.536034	MP	Herm	DLW118	2021_07_22_DLW118_20C_herm_01004_Statistics	39.4596	WT	SYP2GFP	5780000	146479
0.596639	0.512614	MP	Herm	DLW118	2021_07_22_DLW118_20C_herm_01004_Statistics	34.6808	WT	SYP2GFP	5110000	147344
0.604936	0.52264	MP	Herm	DLW118	2021_07_22_DLW118_20C_herm_01004_Statistics	34.0317	WT	SYP2GFP	4740000	139282
0.634537	0.558406	MP	Herm	DLW118	2021_07_22_DLW118_20C_herm_01004_Statistics	30.4341	WT	SYP2GFP	4090000	134389
0.560077	0.468436	MP	Herm	DLW118	2021_07_22_DLW118_20C_herm_01004_Statistics	29.6103	WT	SYP2GFP	4460000	150623
0.617888	0.538289	MP	Herm	DLW118	2021_07_22_DLW118_20C_herm_01004_Statistics	31.4054	WT	SYP2GFP	4170000	132780
0.583752	0.497042	MP	Herm	DLW118	2021_07_22_DLW118_20C_herm_01004_Statistics	54.7849	WT	SYP2GFP	10700000	195309
0.551791	0.458423	MP	Herm	DLW118	2021_07_22_DLW118_20C_herm_01004_Statistics	23.6764	WT	SYP2GFP	3340000	141069
0.599469	0.516033	MP	Herm	DLW118	2021_07_22_DLW118_20C_herm_01004_Statistics	35.3902	WT	SYP2GFP	4760000	134501
0.571635	0.482401	MP	Herm	DLW118	2021_07_22_DLW118_20C_herm_01004_Statistics	34.531	WT	SYP2GFP	5130000	148562
0.560933	0.469469	MP	Herm	DLW118	2021_07_22_DLW118_20C_herm_01004_Statistics	29.6643	WT	SYP2GFP	3940000	132820
0.535379	0.438592	MP	Herm	DLW118	2021_07_22_DLW118_20C_herm_01004_Statistics	27.9704	WT	SYP2GFP	3860000	138003
0.535538	0.438784	MP	Herm	DLW118	2021_07_22_DLW118_20C_herm_01004_Statistics	28.099	WT	SYP2GFP	3920000	139507
0.523326	0.424029	MP	Herm	DLW118	2021_07_22_DLW118_20C_herm_01004_Statistics	25.9607	WT	SYP2GFP	3490000	134434
0.526452	0.427806	MP	Herm	DLW118	2021_07_22_DLW118_20C_herm_01004_Statistics	32.575	WT	SYP2GFP	4450000	136608
0.857672	0.828024	LP	Herm	DLW118	2021_07_22_DLW118_20C_herm_01004_Statistics	45.4427	WT	SYP2GFP	6600000	145238
0.839657	0.806256	LP	Herm	DLW118	2021_07_22_DLW118_20C_herm_01004_Statistics	41.2116	WT	SYP2GFP	5580000	135399
0.867588	0.840005	LP	Herm	DLW118	2021_07_22_DLW118_20C_herm_01004_Statistics	34.0545	WT	SYP2GFP	4410000	129498
0.83439	0.799892	LP	Herm	DLW118	2021_07_22_DLW118_20C_herm_01004_Statistics	33.4607	WT	SYP2GFP	4440000	132693
0.817542	0.779534	LP	Herm	DLW118	2021_07_22_DLW118_20C_herm_01004_Statistics	43.0919	WT	SYP2GFP	6030000	139933
0.818559	0.780762	LP	Herm	DLW118	2021_07_22_DLW118_20C_herm_01004_Statistics	42.0057	WT	SYP2GFP	5590000	133077
0.801428	0.760063	LP	Herm	DLW118	2021_07_22_DLW118_20C_herm_01004_Statistics	44.7622	WT	SYP2GFP	6360000	142084
0.771976	0.724476	LP	Herm	DLW118	2021_07_22_DLW118_20C_herm_01004_Statistics	44.3297	WT	SYP2GFP	6690000	150915
0.797624	0.755466	LP	Herm	DLW118	2021_07_22_DLW118_20C_herm_01004_Statistics	47.1192	WT	SYP2GFP	6550000	139009
0.758774	0.708523	LP	Herm	DLW118	2021_07_22_DLW118_20C_herm_01004_Statistics	54.8407	WT	SYP2GFP	8290000	151165
0.730097	0.673873	LP	Herm	DLW118	2021_07_22_DLW118_20C_herm_01004_Statistics	45.0507	WT	SYP2GFP	6660000	147833
0.769259	0.721192	LP	Herm	DLW118	2021_07_22_DLW118_20C_herm_01004_Statistics	47.1726	WT	SYP2GFP	6150000	130372
0.743739	0.690357	LP	Herm	DLW118	2021_07_22_DLW118_20C_herm_01004_Statistics	39.4983	WT	SYP2GFP	5340000	135196
0.735435	0.680323	LP	Herm	DLW118	2021_07_22_DLW118_20C_herm_01004_Statistics	42.3431	WT	SYP2GFP	5850000	138157
0.714633	0.655187	MP	Herm	DLW118	2021_07_22_DLW118_20C_herm_01004_Statistics	43.7237	WT	SYP2GFP	6260000	143172
0.673492	0.605476	MP	Herm	DLW118	2021_07_22_DLW118_20C_herm_01004_Statistics	44.2631	WT	SYP2GFP	6650000	150238
0.686645	0.621369	MP	Herm	DLW118	2021_07_22_DLW118_20C_herm_01004_Statistics	40.974	WT	SYP2GFP	5950000	145214
0.703435	0.641657	MP	Herm	DLW118	2021_07_22_DLW118_20C_herm_01004_Statistics	39.395	WT	SYP2GFP	5570000	141389
0.706088	0.644862	MP	Herm	DLW118	2021_07_22_DLW118_20C_herm_01004_Statistics	36.4396	WT	SYP2GFP	4880000	133920
0.679888	0.613204	MP	Herm	DLW118	2021_07_22_DLW118_20C_herm_01004_Statistics	33.5052	WT	SYP2GFP	4740000	141471
0.670352	0.601682	MP	Herm	DLW118	2021_07_22_DLW118_20C_herm_01004_Statistics	39.174	WT	SYP2GFP	5250000	134017
0.659552	0.588632	MP	Herm	DLW118	2021_07_22_DLW118_20C_herm_01004_Statistics	37.899	WT	SYP2GFP	5230000	137998
0.644126	0.569993	MP	Herm	DLW118	2021_07_22_DLW118_20C_herm_01004_Statistics	34.5003	WT	SYP2GFP	4880000	141448
0.986216	0.983345	LP	Herm	DLW118	2021_07_22_DLW118_20C_herm_01004_Statistics	28.4529	WT	SYP2GFP	4460000	156750
0.975189	0.970021	LP	Herm	DLW118	2021_07_22_DLW118_20C_herm_01004_Statistics	31.6486	WT	SYP2GFP	4830000	152613
0.967043	0.960178	LP	Herm	DLW118	2021_07_22_DLW118_20C_herm_01004_Statistics	44.9433	WT	SYP2GFP	6650000	147964
0.979728	0.975505	LP	Herm	DLW118	2021_07_22_DLW118_20C_herm_01004_Statistics	40.1384	WT	SYP2GFP	5810000	144749
0.932534	0.918481	LP	Herm	DLW118	2021_07_22_DLW118_20C_herm_01004_Statistics	40.0373	WT	SYP2GFP	5790000	144615
0.945507	0.934155	LP	Herm	DLW118	2021_07_22_DLW118_20C_herm_01004_Statistics	38.1266	WT	SYP2GFP	5410000	141896
0.913869	0.895927	LP	Herm	DLW118	2021_07_22_DLW118_20C_herm_01004_Statistics	44.3299	WT	SYP2GFP	6360000	143470
0.925683	0.910202	LP	Herm	DLW118	2021_07_22_DLW118_20C_herm_01004_Statistics	35.332	WT	SYP2GFP	4720000	133590
0.915394	0.897769	LP	Herm	DLW118	2021_07_22_DLW118_20C_herm_01004_Statistics	37.4703	WT	SYP2GFP	5060000	135040
0.90128	0.880716	LP	Herm	DLW118	2021_07_22_DLW118_20C_herm_01004_Statistics	39.6815	WT	SYP2GFP	5520000	139108
0.882321	0.857807	LP	Herm	DLW118	2021_07_22_DLW118_20C_herm_01004_Statistics	36.1049	WT	SYP2GFP	4880000	135162
0.894556	0.872591	LP	Herm	DLW118	2021_07_22_DLW118_20C_herm_01004_Statistics	32.6312	WT	SYP2GFP	4200000	128711
0.88283	0.858422	LP	Herm	DLW118	2021_07_22_DLW118_20C_herm_01004_Statistics	42.0501	WT	SYP2GFP	5610000	133412
0.0233948	-0.324478	TZ	Herm	DLW118	2021_07_22_DLW118_20C_herm_01006_Statistics	16.3096	WT	SYP2GFP	1840000	112817
0.00851727	-0.344655	TZ	Herm	DLW118	2021_07_22_DLW118_20C_herm_01006_Statistics	12.1412	WT	SYP2GFP	1270000	104603
0.0487347	-0.290112	TZ	Herm	DLW118	2021_07_22_DLW118_20C_herm_01006_Statistics	12.1482	WT	SYP2GFP	1440000	118536
0.0723876	-0.258033	TZ	Herm	DLW118	2021_07_22_DLW118_20C_herm_01006_Statistics	13.6697	WT	SYP2GFP	1480000	108269
0.0734211	-0.256632	TZ	Herm	DLW118	2021_07_22_DLW118_20C_herm_01006_Statistics	11.2706	WT	SYP2GFP	1220000	108246
0.0916894	-0.231856	TZ	Herm	DLW118	2021_07_22_DLW118_20C_herm_01006_Statistics	16.2763	WT	SYP2GFP	1900000	116734
0.0971458	-0.224456	TZ	Herm	DLW118	2021_07_22_DLW118_20C_herm_01006_Statistics	18.9788	WT	SYP2GFP	2400000	126457
0.11244	-0.203715	TZ	Herm	DLW118	2021_07_22_DLW118_20C_herm_01006_Statistics	13.4694	WT	SYP2GFP	1580000	117303
0.0997846	-0.220878	TZ	Herm	DLW118	2021_07_22_DLW118_20C_herm_01006_Statistics	22.0222	WT	SYP2GFP	2920000	132593
0.122767	-0.189709	TZ	Herm	DLW118	2021_07_22_DLW118_20C_herm_01006_Statistics	17.2573	WT	SYP2GFP	2160000	125164
0.0779976	-0.250425	TZ	Herm	DLW118	2021_07_22_DLW118_20C_herm_01006_Statistics	22.5267	WT	SYP2GFP	2740000	121633
0.103908	-0.215285	TZ	Herm	DLW118	2021_07_22_DLW118_20C_herm_01006_Statistics	15.6826	WT	SYP2GFP	1880000	119878
0.0774746	-0.251134	TZ	Herm	DLW118	2021_07_22_DLW118_20C_herm_01006_Statistics	19.4373	WT	SYP2GFP	2410000	123988
0.129409	-0.1807	TZ	Herm	DLW118	2021_07_22_DLW118_20C_herm_01006_Statistics	18.5618	WT	SYP2GFP	2280000	122833
0.144761	-0.15988	TZ	Herm	DLW118	2021_07_22_DLW118_20C_herm_01006_Statistics	14.6248	WT	SYP2GFP	1830000	125130
0.125244	-0.186349	TZ	Herm	DLW118	2021_07_22_DLW118_20C_herm_01006_Statistics	11.4903	WT	SYP2GFP	1380000	120101
0.143978	-0.160943	TZ	Herm	DLW118	2021_07_22_DLW118_20C_herm_01006_Statistics	16.523	WT	SYP2GFP	2110000	127701
0.120645	-0.192586	TZ	Herm	DLW118	2021_07_22_DLW118_20C_herm_01006_Statistics	18.5968	WT	SYP2GFP	2340000	125828
0.138521	-0.168343	TZ	Herm	DLW118	2021_07_22_DLW118_20C_herm_01006_Statistics	19.7531	WT	SYP2GFP	2800000	141750
0.185284	-0.104922	TZ	Herm	DLW118	2021_07_22_DLW118_20C_herm_01006_Statistics	18.8643	WT	SYP2GFP	2420000	128285
0.1673	-0.129313	TZ	Herm	DLW118	2021_07_22_DLW118_20C_herm_01006_Statistics	22.9627	WT	SYP2GFP	2840000	123679
0.150781	-0.151716	TZ	Herm	DLW118	2021_07_22_DLW118_20C_herm_01006_Statistics	20.3509	WT	SYP2GFP	2630000	129233
0.186221	-0.103652	TZ	Herm	DLW118	2021_07_22_DLW118_20C_herm_01006_Statistics	16.2767	WT	SYP2GFP	2050000	125947
0.156868	-0.143461	TZ	Herm	DLW118	2021_07_22_DLW118_20C_herm_01006_Statistics	23.1042	WT	SYP2GFP	2980000	128981
0.174963	-0.11892	TZ	Herm	DLW118	2021_07_22_DLW118_20C_herm_01006_Statistics	16.7318	WT	SYP2GFP	2170000	129693
0.167889	-0.128515	TZ	Herm	DLW118	2021_07_22_DLW118_20C_herm_01006_Statistics	18.9002	WT	SYP2GFP	2280000	120634
0.19776	-0.0880023	TZ	Herm	DLW118	2021_07_22_DLW118_20C_herm_01006_Statistics	15.9375	WT	SYP2GFP	2040000	128000
0.212536	-0.0679628	TZ	Herm	DLW118	2021_07_22_DLW118_20C_herm_01006_Statistics	13.1474	WT	SYP2GFP	1560000	118655
0.190497	-0.0978528	TZ	Herm	DLW118	2021_07_22_DLW118_20C_herm_01006_Statistics	18.1348	WT	SYP2GFP	2360000	130137
0.215954	-0.0633274	TZ	Herm	DLW118	2021_07_22_DLW118_20C_herm_01006_Statistics	25.6246	WT	SYP2GFP	3330000	129953
0.189555	-0.0991303	TZ	Herm	DLW118	2021_07_22_DLW118_20C_herm_01006_Statistics	21.3155	WT	SYP2GFP	2830000	132767
0.212319	-0.0682577	TZ	Herm	DLW118	2021_07_22_DLW118_20C_herm_01006_Statistics	26.5879	WT	SYP2GFP	3210000	120732
0.243095	-0.0265184	TZ	Herm	DLW118	2021_07_22_DLW118_20C_herm_01006_Statistics	23.2494	WT	SYP2GFP	3250000	139789
0.212272	-0.0683216	TZ	Herm	DLW118	2021_07_22_DLW118_20C_herm_01006_Statistics	23.8138	WT	SYP2GFP	2970000	124718
0.23504	-0.0374436	TZ	Herm	DLW118	2021_07_22_DLW118_20C_herm_01006_Statistics	18.8878	WT	SYP2GFP	2580000	136596
0.241568	-0.0285903	TZ	Herm	DLW118	2021_07_22_DLW118_20C_herm_01006_Statistics	25.8727	WT	SYP2GFP	3780000	146100
0.24524	-0.0236103	TZ	Herm	DLW118	2021_07_22_DLW118_20C_herm_01006_Statistics	22.4664	WT	SYP2GFP	2960000	131752
0.255483	-0.00971802	TZ	Herm	DLW118	2021_07_22_DLW118_20C_herm_01006_Statistics	21.1326	WT	SYP2GFP	3010000	142434
0.276072	0.0182049	EP	Herm	DLW118	2021_07_22_DLW118_20C_herm_01006_Statistics	30.7651	WT	SYP2GFP	4410000	143344
0.266059	0.00462484	EP	Herm	DLW118	2021_07_22_DLW118_20C_herm_01006_Statistics	32.9132	WT	SYP2GFP	4670000	141888
0.301651	0.0528951	EP	Herm	DLW118	2021_07_22_DLW118_20C_herm_01006_Statistics	32.2106	WT	SYP2GFP	4710000	146225
0.278079	0.0209259	EP	Herm	DLW118	2021_07_22_DLW118_20C_herm_01006_Statistics	31.1277	WT	SYP2GFP	4440000	142638
0.297577	0.0473697	EP	Herm	DLW118	2021_07_22_DLW118_20C_herm_01006_Statistics	33.3338	WT	SYP2GFP	4850000	145498
0.324018	0.0832287	EP	Herm	DLW118	2021_07_22_DLW118_20C_herm_01006_Statistics	30.8381	WT	SYP2GFP	4680000	151760
0.298042	0.048	EP	Herm	DLW118	2021_07_22_DLW118_20C_herm_01006_Statistics	30.777	WT	SYP2GFP	4300000	139715
0.273871	0.0152194	EP	Herm	DLW118	2021_07_22_DLW118_20C_herm_01006_Statistics	30.9682	WT	SYP2GFP	4140000	133686
0.306166	0.0590179	EP	Herm	DLW118	2021_07_22_DLW118_20C_herm_01006_Statistics	25.5305	WT	SYP2GFP	3350000	131216
0.325951	0.0858503	EP	Herm	DLW118	2021_07_22_DLW118_20C_herm_01006_Statistics	33.5126	WT	SYP2GFP	5170000	154270
0.32653	0.0866353	EP	Herm	DLW118	2021_07_22_DLW118_20C_herm_01006_Statistics	28.2288	WT	SYP2GFP	3810000	134969
0.323659	0.0827423	EP	Herm	DLW118	2021_07_22_DLW118_20C_herm_01006_Statistics	34.0154	WT	SYP2GFP	4990000	146698
0.339418	0.104115	EP	Herm	DLW118	2021_07_22_DLW118_20C_herm_01006_Statistics	30.2317	WT	SYP2GFP	4290000	141904
0.353531	0.123255	EP	Herm	DLW118	2021_07_22_DLW118_20C_herm_01006_Statistics	32.8581	WT	SYP2GFP	4890000	148822
0.430931	0.228225	EP	Herm	DLW118	2021_07_22_DLW118_20C_herm_01006_Statistics	35.5686	WT	SYP2GFP	5470000	153787
0.419858	0.213208	EP	Herm	DLW118	2021_07_22_DLW118_20C_herm_01006_Statistics	33.3353	WT	SYP2GFP	4780000	143392
0.359851	0.131826	EP	Herm	DLW118	2021_07_22_DLW118_20C_herm_01006_Statistics	32.1724	WT	SYP2GFP	4550000	141426
0.356866	0.127778	EP	Herm	DLW118	2021_07_22_DLW118_20C_herm_01006_Statistics	35.5283	WT	SYP2GFP	5280000	148614
0.404179	0.191944	EP	Herm	DLW118	2021_07_22_DLW118_20C_herm_01006_Statistics	39.6057	WT	SYP2GFP	6130000	154776
0.38297	0.16318	EP	Herm	DLW118	2021_07_22_DLW118_20C_herm_01006_Statistics	29.3412	WT	SYP2GFP	4170000	142121
0.378151	0.156644	EP	Herm	DLW118	2021_07_22_DLW118_20C_herm_01006_Statistics	34.0447	WT	SYP2GFP	5010000	147159
0.43831	0.238233	EP	Herm	DLW118	2021_07_22_DLW118_20C_herm_01006_Statistics	33.5334	WT	SYP2GFP	5450000	162525
0.423467	0.218103	EP	Herm	DLW118	2021_07_22_DLW118_20C_herm_01006_Statistics	31.7022	WT	SYP2GFP	4790000	151094
0.401017	0.187655	EP	Herm	DLW118	2021_07_22_DLW118_20C_herm_01006_Statistics	37.5506	WT	SYP2GFP	5690000	151529
0.448619	0.252214	EP	Herm	DLW118	2021_07_22_DLW118_20C_herm_01006_Statistics	37.698	WT	SYP2GFP	6210000	164730
0.428556	0.225005	EP	Herm	DLW118	2021_07_22_DLW118_20C_herm_01006_Statistics	28.7762	WT	SYP2GFP	4200000	145954
0.408006	0.197134	EP	Herm	DLW118	2021_07_22_DLW118_20C_herm_01006_Statistics	27.4537	WT	SYP2GFP	3960000	144243
0.492768	0.312088	EP	Herm	DLW118	2021_07_22_DLW118_20C_herm_01006_Statistics	33.8764	WT	SYP2GFP	4960000	146415
0.460041	0.267704	EP	Herm	DLW118	2021_07_22_DLW118_20C_herm_01006_Statistics	42.9726	WT	SYP2GFP	6810000	158473
0.454123	0.259678	EP	Herm	DLW118	2021_07_22_DLW118_20C_herm_01006_Statistics	37.5893	WT	SYP2GFP	5610000	149245
0.524827	0.355568	MP	Herm	DLW118	2021_07_22_DLW118_20C_herm_01006_Statistics	40.5261	WT	SYP2GFP	6050000	149287
0.516797	0.344677	MP	Herm	DLW118	2021_07_22_DLW118_20C_herm_01006_Statistics	33.7564	WT	SYP2GFP	4930000	146046
0.462103	0.2705	EP	Herm	DLW118	2021_07_22_DLW118_20C_herm_01006_Statistics	36.2225	WT	SYP2GFP	5530000	152668
0.510379	0.335974	MP	Herm	DLW118	2021_07_22_DLW118_20C_herm_01006_Statistics	33.8437	WT	SYP2GFP	4980000	147147
0.477372	0.291209	EP	Herm	DLW118	2021_07_22_DLW118_20C_herm_01006_Statistics	39.216	WT	SYP2GFP	6040000	154019
0.552058	0.392498	MP	Herm	DLW118	2021_07_22_DLW118_20C_herm_01006_Statistics	22.4361	WT	SYP2GFP	3030000	135050
0.545824	0.384044	MP	Herm	DLW118	2021_07_22_DLW118_20C_herm_01006_Statistics	24.5606	WT	SYP2GFP	3400000	138433
0.574342	0.42272	MP	Herm	DLW118	2021_07_22_DLW118_20C_herm_01006_Statistics	44.0345	WT	SYP2GFP	6500000	147612
0.59557	0.451509	MP	Herm	DLW118	2021_07_22_DLW118_20C_herm_01006_Statistics	22.2909	WT	SYP2GFP	2890000	129649
0.623208	0.488993	MP	Herm	DLW118	2021_07_22_DLW118_20C_herm_01006_Statistics	29.3969	WT	SYP2GFP	4120000	140151
0.603908	0.462818	MP	Herm	DLW118	2021_07_22_DLW118_20C_herm_01006_Statistics	51.7371	WT	SYP2GFP	7890000	152502
0.630295	0.498604	MP	Herm	DLW118	2021_07_22_DLW118_20C_herm_01006_Statistics	27.9652	WT	SYP2GFP	3640000	130162
0.631984	0.500894	MP	Herm	DLW118	2021_07_22_DLW118_20C_herm_01006_Statistics	34.5373	WT	SYP2GFP	5100000	147666
0.645557	0.519303	MP	Herm	DLW118	2021_07_22_DLW118_20C_herm_01006_Statistics	27.9727	WT	SYP2GFP	3820000	136562
0.658911	0.537412	MP	Herm	DLW118	2021_07_22_DLW118_20C_herm_01006_Statistics	36.1302	WT	SYP2GFP	5510000	152504
0.670883	0.553649	MP	Herm	DLW118	2021_07_22_DLW118_20C_herm_01006_Statistics	26.8401	WT	SYP2GFP	3640000	135618
0.669681	0.552019	MP	Herm	DLW118	2021_07_22_DLW118_20C_herm_01006_Statistics	35.9597	WT	SYP2GFP	5420000	150724
0.683313	0.570507	MP	Herm	DLW118	2021_07_22_DLW118_20C_herm_01006_Statistics	47.7779	WT	SYP2GFP	7890000	165139
0.679971	0.565975	MP	Herm	DLW118	2021_07_22_DLW118_20C_herm_01006_Statistics	25.6881	WT	SYP2GFP	3330000	129632
0.693873	0.584829	MP	Herm	DLW118	2021_07_22_DLW118_20C_herm_01006_Statistics	38.9914	WT	SYP2GFP	6040000	154906
0.698546	0.591167	MP	Herm	DLW118	2021_07_22_DLW118_20C_herm_01006_Statistics	35.2407	WT	SYP2GFP	4890000	138760
0.708125	0.604157	MP	Herm	DLW118	2021_07_22_DLW118_20C_herm_01006_Statistics	26.4171	WT	SYP2GFP	3750000	141954
0.719222	0.619207	MP	Herm	DLW118	2021_07_22_DLW118_20C_herm_01006_Statistics	33.3022	WT	SYP2GFP	4630000	139030
0.724931	0.62695	MP	Herm	DLW118	2021_07_22_DLW118_20C_herm_01006_Statistics	36.8032	WT	SYP2GFP	5100000	138575
0.732742	0.637543	MP	Herm	DLW118	2021_07_22_DLW118_20C_herm_01006_Statistics	28.4916	WT	SYP2GFP	3610000	126704
0.7344	0.639792	MP	Herm	DLW118	2021_07_22_DLW118_20C_herm_01006_Statistics	34.1594	WT	SYP2GFP	4790000	140225
0.752448	0.664268	MP	Herm	DLW118	2021_07_22_DLW118_20C_herm_01006_Statistics	36.6887	WT	SYP2GFP	5240000	142823
0.770215	0.688365	LP	Herm	DLW118	2021_07_22_DLW118_20C_herm_01006_Statistics	39.0156	WT	SYP2GFP	5480000	140457
0.748482	0.65889	MP	Herm	DLW118	2021_07_22_DLW118_20C_herm_01006_Statistics	33.9873	WT	SYP2GFP	4690000	137993
0.779974	0.7016	LP	Herm	DLW118	2021_07_22_DLW118_20C_herm_01006_Statistics	39.9217	WT	SYP2GFP	6060000	151797
0.76331	0.678999	LP	Herm	DLW118	2021_07_22_DLW118_20C_herm_01006_Statistics	40.8584	WT	SYP2GFP	5780000	141464
0.792065	0.717997	LP	Herm	DLW118	2021_07_22_DLW118_20C_herm_01006_Statistics	41.1402	WT	SYP2GFP	6170000	149975
0.800167	0.728986	LP	Herm	DLW118	2021_07_22_DLW118_20C_herm_01006_Statistics	16.5963	WT	SYP2GFP	2530000	152444
0.794636	0.721484	LP	Herm	DLW118	2021_07_22_DLW118_20C_herm_01006_Statistics	20.2107	WT	SYP2GFP	3040000	150415
0.801999	0.73147	LP	Herm	DLW118	2021_07_22_DLW118_20C_herm_01006_Statistics	38.6593	WT	SYP2GFP	5310000	137354
0.856642	0.805577	LP	Herm	DLW118	2021_07_22_DLW118_20C_herm_01006_Statistics	44.3805	WT	SYP2GFP	6630000	149390
0.835018	0.776251	LP	Herm	DLW118	2021_07_22_DLW118_20C_herm_01006_Statistics	42.903	WT	SYP2GFP	6280000	146377
0.812496	0.745706	LP	Herm	DLW118	2021_07_22_DLW118_20C_herm_01006_Statistics	36.2932	WT	SYP2GFP	5260000	144931
0.86412	0.815719	LP	Herm	DLW118	2021_07_22_DLW118_20C_herm_01006_Statistics	46.1854	WT	SYP2GFP	6740000	145934
0.842558	0.786476	LP	Herm	DLW118	2021_07_22_DLW118_20C_herm_01006_Statistics	40.2451	WT	SYP2GFP	6050000	150329
0.815123	0.749269	LP	Herm	DLW118	2021_07_22_DLW118_20C_herm_01006_Statistics	38.3117	WT	SYP2GFP	5530000	144342
0.895175	0.857836	LP	Herm	DLW118	2021_07_22_DLW118_20C_herm_01006_Statistics	49.2492	WT	SYP2GFP	6540000	132794
0.84841	0.794413	LP	Herm	DLW118	2021_07_22_DLW118_20C_herm_01006_Statistics	35.9759	WT	SYP2GFP	4960000	137870
0.869861	0.823505	LP	Herm	DLW118	2021_07_22_DLW118_20C_herm_01006_Statistics	49.6213	WT	SYP2GFP	7720000	155578
0.846336	0.7916	LP	Herm	DLW118	2021_07_22_DLW118_20C_herm_01006_Statistics	35.1471	WT	SYP2GFP	4750000	135146
0.833158	0.773728	LP	Herm	DLW118	2021_07_22_DLW118_20C_herm_01006_Statistics	34.8747	WT	SYP2GFP	4810000	137922
0.905431	0.871745	LP	Herm	DLW118	2021_07_22_DLW118_20C_herm_01006_Statistics	42.4755	WT	SYP2GFP	5550000	130664
0.883401	0.841867	LP	Herm	DLW118	2021_07_22_DLW118_20C_herm_01006_Statistics	37.1433	WT	SYP2GFP	5060000	136229
0.902974	0.868412	LP	Herm	DLW118	2021_07_22_DLW118_20C_herm_01006_Statistics	49.5454	WT	SYP2GFP	7180000	144918
0.972776	0.963078	LP	Herm	DLW118	2021_07_22_DLW118_20C_herm_01006_Statistics	39.3328	WT	SYP2GFP	5350000	136019
0.989011	0.985096	LP	Herm	DLW118	2021_07_22_DLW118_20C_herm_01006_Statistics	40.68	WT	SYP2GFP	5370000	132006
0.938948	0.917201	LP	Herm	DLW118	2021_07_22_DLW118_20C_herm_01006_Statistics	51.2481	WT	SYP2GFP	6960000	135810
0.974275	0.965112	LP	Herm	DLW118	2021_07_22_DLW118_20C_herm_01006_Statistics	28.7218	WT	SYP2GFP	4320000	150408
0.940616	0.919463	LP	Herm	DLW118	2021_07_22_DLW118_20C_herm_01006_Statistics	42.7182	WT	SYP2GFP	5460000	127814
0.984656	0.979191	LP	Herm	DLW118	2021_07_22_DLW118_20C_herm_01006_Statistics	18.1477	WT	SYP2GFP	2430000	133901
0.916144	0.886274	LP	Herm	DLW118	2021_07_22_DLW118_20C_herm_01006_Statistics	39.8291	WT	SYP2GFP	5100000	128047
0.94844	0.930074	LP	Herm	DLW118	2021_07_22_DLW118_20C_herm_01006_Statistics	36.7643	WT	SYP2GFP	4890000	133009
0.922595	0.895023	LP	Herm	DLW118	2021_07_22_DLW118_20C_herm_01006_Statistics	31.8417	WT	SYP2GFP	4050000	127192
0.972298	0.962431	LP	Herm	DLW118	2021_07_22_DLW118_20C_herm_01006_Statistics	39.9041	WT	SYP2GFP	5220000	130814
0.939404	0.917819	LP	Herm	DLW118	2021_07_22_DLW118_20C_herm_01006_Statistics	29.0795	WT	SYP2GFP	3800000	130676
0.976657	0.968342	LP	Herm	DLW118	2021_07_22_DLW118_20C_herm_01006_Statistics	32.1205	WT	SYP2GFP	4170000	129824
0.910355	0.878422	LP	Herm	DLW118	2021_07_22_DLW118_20C_herm_01006_Statistics	29.8566	WT	SYP2GFP	3930000	131629
0.0892464	-0.154492	TZ	Male	DLW118	2021_07_22_DLW118_20C_male_01_Statistics	6.76661	WT	SYP2GFP	783414	115776
0.0591	-0.192706	TZ	Male	DLW118	2021_07_22_DLW118_20C_male_01_Statistics	4.08846	WT	SYP2GFP	503221	123083
0.0397004	-0.217298	TZ	Male	DLW118	2021_07_22_DLW118_20C_male_01_Statistics	3.88548	WT	SYP2GFP	498898	128401
0.130194	-0.102585	TZ	Male	DLW118	2021_07_22_DLW118_20C_male_01_Statistics	3.92936	WT	SYP2GFP	502996	128010
0.106314	-0.132856	TZ	Male	DLW118	2021_07_22_DLW118_20C_male_01_Statistics	2.0533	WT	SYP2GFP	220206	107245
0.15102	-0.0761868	TZ	Male	DLW118	2021_07_22_DLW118_20C_male_01_Statistics	3.9279	WT	SYP2GFP	435172	110790
0.200417	-0.0135692	TZ	Male	DLW118	2021_07_22_DLW118_20C_male_01_Statistics	2.88247	WT	SYP2GFP	330199	114554
0.197542	-0.0172145	TZ	Male	DLW118	2021_07_22_DLW118_20C_male_01_Statistics	6.85745	WT	SYP2GFP	830119	121054
0.199774	-0.014385	TZ	Male	DLW118	2021_07_22_DLW118_20C_male_01_Statistics	7.36228	WT	SYP2GFP	868317	117941
0.212648	0.00193425	EP	Male	DLW118	2021_07_22_DLW118_20C_male_01_Statistics	7.3766	WT	SYP2GFP	892725	121021
0.252094	0.0519374	EP	Male	DLW118	2021_07_22_DLW118_20C_male_01_Statistics	11.7684	WT	SYP2GFP	1490000	126610
0.231476	0.0258015	EP	Male	DLW118	2021_07_22_DLW118_20C_male_01_Statistics	6.8183	WT	SYP2GFP	860870	126259
0.245564	0.0436596	EP	Male	DLW118	2021_07_22_DLW118_20C_male_01_Statistics	6.60716	WT	SYP2GFP	768308	116284
0.218254	0.00904086	EP	Male	DLW118	2021_07_22_DLW118_20C_male_01_Statistics	3.70347	WT	SYP2GFP	379689	102522
0.357179	0.185146	EP	Male	DLW118	2021_07_22_DLW118_20C_male_01_Statistics	15.2048	WT	SYP2GFP	2080000	136799
0.341472	0.165235	EP	Male	DLW118	2021_07_22_DLW118_20C_male_01_Statistics	13.5445	WT	SYP2GFP	1660000	122559
0.284279	0.0927362	EP	Male	DLW118	2021_07_22_DLW118_20C_male_01_Statistics	10.2685	WT	SYP2GFP	1360000	132444
0.269549	0.0740643	EP	Male	DLW118	2021_07_22_DLW118_20C_male_01_Statistics	9.87908	WT	SYP2GFP	1210000	122481
0.402477	0.242566	EP	Male	DLW118	2021_07_22_DLW118_20C_male_01_Statistics	18.6413	WT	SYP2GFP	2530000	135720
0.410401	0.252611	EP	Male	DLW118	2021_07_22_DLW118_20C_male_01_Statistics	14.4668	WT	SYP2GFP	1820000	125805
0.454422	0.308413	EP	Male	DLW118	2021_07_22_DLW118_20C_male_01_Statistics	15.171	WT	SYP2GFP	1880000	123921
0.374861	0.207559	EP	Male	DLW118	2021_07_22_DLW118_20C_male_01_Statistics	13.8103	WT	SYP2GFP	1730000	125269
0.474345	0.333668	MP	Male	DLW118	2021_07_22_DLW118_20C_male_01_Statistics	21.0514	WT	SYP2GFP	2860000	135858
0.435611	0.284568	EP	Male	DLW118	2021_07_22_DLW118_20C_male_01_Statistics	19.3218	WT	SYP2GFP	2600000	134563
0.589441	0.479566	MP	Male	DLW118	2021_07_22_DLW118_20C_male_01_Statistics	28.4311	WT	SYP2GFP	4340000	152650
0.553338	0.433801	MP	Male	DLW118	2021_07_22_DLW118_20C_male_01_Statistics	20.4367	WT	SYP2GFP	2830000	138476
0.515741	0.386142	MP	Male	DLW118	2021_07_22_DLW118_20C_male_01_Statistics	18.7835	WT	SYP2GFP	2520000	134160
0.57693	0.463707	MP	Male	DLW118	2021_07_22_DLW118_20C_male_01_Statistics	25.8622	WT	SYP2GFP	3500000	135333
0.495791	0.360854	MP	Male	DLW118	2021_07_22_DLW118_20C_male_01_Statistics	18.9497	WT	SYP2GFP	2360000	124540
0.533586	0.408763	MP	Male	DLW118	2021_07_22_DLW118_20C_male_01_Statistics	18.0654	WT	SYP2GFP	2160000	119566
0.733721	0.662459	MP	Male	DLW118	2021_07_22_DLW118_20C_male_01_Statistics	37.6598	WT	SYP2GFP	6720000	178440
0.699433	0.618995	MP	Male	DLW118	2021_07_22_DLW118_20C_male_01_Statistics	36.0295	WT	SYP2GFP	6430000	178465
0.719925	0.644971	MP	Male	DLW118	2021_07_22_DLW118_20C_male_01_Statistics	30.9737	WT	SYP2GFP	4710000	152064
0.665796	0.576356	MP	Male	DLW118	2021_07_22_DLW118_20C_male_01_Statistics	28.537	WT	SYP2GFP	4400000	154186
0.631649	0.53307	MP	Male	DLW118	2021_07_22_DLW118_20C_male_01_Statistics	29.004	WT	SYP2GFP	4290000	147911
0.678761	0.59279	MP	Male	DLW118	2021_07_22_DLW118_20C_male_01_Statistics	28.4955	WT	SYP2GFP	4130000	144935
0.645918	0.551158	MP	Male	DLW118	2021_07_22_DLW118_20C_male_01_Statistics	21.0087	WT	SYP2GFP	2700000	128518
0.61049	0.506248	MP	Male	DLW118	2021_07_22_DLW118_20C_male_01_Statistics	21.7245	WT	SYP2GFP	3010000	138553
0.814775	0.765204	LP	Male	DLW118	2021_07_22_DLW118_20C_male_01_Statistics	37.2735	WT	SYP2GFP	6640000	178143
0.771262	0.710047	LP	Male	DLW118	2021_07_22_DLW118_20C_male_01_Statistics	34.5366	WT	SYP2GFP	5830000	168806
0.82897	0.783198	LP	Male	DLW118	2021_07_22_DLW118_20C_male_01_Statistics	35.2884	WT	SYP2GFP	6280000	177962
0.785643	0.728277	LP	Male	DLW118	2021_07_22_DLW118_20C_male_01_Statistics	32.4589	WT	SYP2GFP	5320000	163900
0.763682	0.700437	LP	Male	DLW118	2021_07_22_DLW118_20C_male_01_Statistics	34.2337	WT	SYP2GFP	5720000	167087
0.981015	0.975934	LP	Male	DLW118	2021_07_22_DLW118_20C_male_01_Statistics	29.9825	WT	SYP2GFP	4830000	161094
0.974415	0.967568	LP	Male	DLW118	2021_07_22_DLW118_20C_male_01_Statistics	26.8843	WT	SYP2GFP	3970000	147670
0.886681	0.856354	LP	Male	DLW118	2021_07_22_DLW118_20C_male_01_Statistics	34.9708	WT	SYP2GFP	6170000	176433
0.876172	0.843033	LP	Male	DLW118	2021_07_22_DLW118_20C_male_01_Statistics	33.2891	WT	SYP2GFP	5510000	165520
0.877387	0.844573	LP	Male	DLW118	2021_07_22_DLW118_20C_male_01_Statistics	29.1537	WT	SYP2GFP	5010000	171848
0.908886	0.884502	LP	Male	DLW118	2021_07_22_DLW118_20C_male_01_Statistics	33.0811	WT	SYP2GFP	5380000	162631
0.916726	0.89444	LP	Male	DLW118	2021_07_22_DLW118_20C_male_01_Statistics	33.2572	WT	SYP2GFP	5690000	171091
0.904272	0.878653	LP	Male	DLW118	2021_07_22_DLW118_20C_male_01_Statistics	29.2794	WT	SYP2GFP	4480000	153009
0.940072	0.924034	LP	Male	DLW118	2021_07_22_DLW118_20C_male_01_Statistics	34.0322	WT	SYP2GFP	5380000	158086
0.943247	0.928058	LP	Male	DLW118	2021_07_22_DLW118_20C_male_01_Statistics	24.6287	WT	SYP2GFP	3510000	142517
0.84709	0.806167	LP	Male	DLW118	2021_07_22_DLW118_20C_male_01_Statistics	35.5067	WT	SYP2GFP	6250000	176023
0.866316	0.830539	LP	Male	DLW118	2021_07_22_DLW118_20C_male_01_Statistics	31.3071	WT	SYP2GFP	5920000	189094
1	1	LP	Male	DLW118	2021_07_22_DLW118_20C_male_01_Statistics	25.355	WT	SYP2GFP	4060000	160126
0.858123	0.820154	LP	Male	DLW118	2021_07_22_DLW118_20C_male_01_Statistics	31.5671	WT	SYP2GFP	5280000	167263
0.861181	0.82403	LP	Male	DLW118	2021_07_22_DLW118_20C_male_01_Statistics	34.1457	WT	SYP2GFP	5570000	163124
0.052269	-0.442432	TZ	Male	DLW118	2021_07_22_DLW118_20C_male_01001_Statistics	10.1893	WT	SYP2GFP	1440000	141325
0.0475799	-0.449568	TZ	Male	DLW118	2021_07_22_DLW118_20C_male_01001_Statistics	17.3608	WT	SYP2GFP	2700000	155523
0.0936825	-0.379401	TZ	Male	DLW118	2021_07_22_DLW118_20C_male_01001_Statistics	15.7508	WT	SYP2GFP	2390000	151738
0.117894	-0.342551	TZ	Male	DLW118	2021_07_22_DLW118_20C_male_01001_Statistics	13.0878	WT	SYP2GFP	1840000	140589
0.162715	-0.274335	TZ	Male	DLW118	2021_07_22_DLW118_20C_male_01001_Statistics	14.6721	WT	SYP2GFP	2390000	162894
0.139798	-0.309214	TZ	Male	DLW118	2021_07_22_DLW118_20C_male_01001_Statistics	14.1659	WT	SYP2GFP	2060000	145420
0.104247	-0.363322	TZ	Male	DLW118	2021_07_22_DLW118_20C_male_01001_Statistics	16.5194	WT	SYP2GFP	2600000	157391
0.16749	-0.267068	TZ	Male	DLW118	2021_07_22_DLW118_20C_male_01001_Statistics	17.5457	WT	SYP2GFP	2810000	160153
0.199777	-0.217927	TZ	Male	DLW118	2021_07_22_DLW118_20C_male_01001_Statistics	35.3799	WT	SYP2GFP	6030000	170436
0.226548	-0.177182	TZ	Male	DLW118	2021_07_22_DLW118_20C_male_01001_Statistics	15.058	WT	SYP2GFP	2050000	136140
0.195512	-0.224419	TZ	Male	DLW118	2021_07_22_DLW118_20C_male_01001_Statistics	20.1121	WT	SYP2GFP	2970000	147672
0.279419	-0.0967133	TZ	Male	DLW118	2021_07_22_DLW118_20C_male_01001_Statistics	15.7612	WT	SYP2GFP	2290000	145294
0.310208	-0.0498532	TZ	Male	DLW118	2021_07_22_DLW118_20C_male_01001_Statistics	12.5906	WT	SYP2GFP	1890000	150112
0.319577	-0.0355938	TZ	Male	DLW118	2021_07_22_DLW118_20C_male_01001_Statistics	19.8888	WT	SYP2GFP	2980000	149833
0.301911	-0.0624798	TZ	Male	DLW118	2021_07_22_DLW118_20C_male_01001_Statistics	12.9705	WT	SYP2GFP	1790000	138005
0.342963	0	EP	Male	DLW118	2021_07_22_DLW118_20C_male_01001_Statistics	15.7284	WT	SYP2GFP	2600000	165306
0.374326	0.0477339	EP	Male	DLW118	2021_07_22_DLW118_20C_male_01001_Statistics	16.2204	WT	SYP2GFP	2610000	160908
0.409087	0.100639	EP	Male	DLW118	2021_07_22_DLW118_20C_male_01001_Statistics	22.3393	WT	SYP2GFP	3740000	167418
0.405249	0.0947977	EP	Male	DLW118	2021_07_22_DLW118_20C_male_01001_Statistics	13.9805	WT	SYP2GFP	2110000	150925
0.357616	0.022301	EP	Male	DLW118	2021_07_22_DLW118_20C_male_01001_Statistics	18.0279	WT	SYP2GFP	2670000	148104
0.378944	0.0547619	EP	Male	DLW118	2021_07_22_DLW118_20C_male_01001_Statistics	19.664	WT	SYP2GFP	2910000	147986
0.463903	0.184069	EP	Male	DLW118	2021_07_22_DLW118_20C_male_01001_Statistics	22.684	WT	SYP2GFP	3820000	168401
0.501727	0.241637	EP	Male	DLW118	2021_07_22_DLW118_20C_male_01001_Statistics	25.1987	WT	SYP2GFP	4190000	166278
0.444862	0.155089	EP	Male	DLW118	2021_07_22_DLW118_20C_male_01001_Statistics	21.8865	WT	SYP2GFP	3720000	169968
0.477822	0.205253	EP	Male	DLW118	2021_07_22_DLW118_20C_male_01001_Statistics	16.8287	WT	SYP2GFP	2680000	159252
0.439858	0.147473	EP	Male	DLW118	2021_07_22_DLW118_20C_male_01001_Statistics	19.4595	WT	SYP2GFP	2890000	148514
0.55877	0.328456	EP	Male	DLW118	2021_07_22_DLW118_20C_male_01001_Statistics	29.0142	WT	SYP2GFP	5220000	179912
0.546331	0.309523	EP	Male	DLW118	2021_07_22_DLW118_20C_male_01001_Statistics	28.6864	WT	SYP2GFP	5190000	180922
0.513973	0.260275	EP	Male	DLW118	2021_07_22_DLW118_20C_male_01001_Statistics	26.4384	WT	SYP2GFP	4520000	170963
0.517025	0.264919	EP	Male	DLW118	2021_07_22_DLW118_20C_male_01001_Statistics	24.9196	WT	SYP2GFP	3960000	158911
0.663319	0.487577	MP	Male	DLW118	2021_07_22_DLW118_20C_male_01001_Statistics	34.578	WT	SYP2GFP	6430000	185956
0.626284	0.431211	MP	Male	DLW118	2021_07_22_DLW118_20C_male_01001_Statistics	32.8945	WT	SYP2GFP	5880000	178753
0.608163	0.403629	MP	Male	DLW118	2021_07_22_DLW118_20C_male_01001_Statistics	31.3669	WT	SYP2GFP	5230000	166736
0.79453	0.687278	LP	Male	DLW118	2021_07_22_DLW118_20C_male_01001_Statistics	38.2896	WT	SYP2GFP	6580000	171848
0.764739	0.641936	MP	Male	DLW118	2021_07_22_DLW118_20C_male_01001_Statistics	39.4397	WT	SYP2GFP	7010000	177740
0.733992	0.595139	MP	Male	DLW118	2021_07_22_DLW118_20C_male_01001_Statistics	34.3629	WT	SYP2GFP	5320000	154818
0.724166	0.580184	MP	Male	DLW118	2021_07_22_DLW118_20C_male_01001_Statistics	36.3798	WT	SYP2GFP	6870000	188841
0.813592	0.71629	LP	Male	DLW118	2021_07_22_DLW118_20C_male_01001_Statistics	40.9616	WT	SYP2GFP	7250000	176995
0.966295	0.948702	LP	Male	DLW118	2021_07_22_DLW118_20C_male_01001_Statistics	27.5748	WT	SYP2GFP	4130000	149774
0.920602	0.879157	LP	Male	DLW118	2021_07_22_DLW118_20C_male_01001_Statistics	32.7955	WT	SYP2GFP	5100000	155509
0.968434	0.951957	LP	Male	DLW118	2021_07_22_DLW118_20C_male_01001_Statistics	31.0694	WT	SYP2GFP	4740000	152562
0.930358	0.894006	LP	Male	DLW118	2021_07_22_DLW118_20C_male_01001_Statistics	30.6917	WT	SYP2GFP	5100000	166169
0.875137	0.809961	LP	Male	DLW118	2021_07_22_DLW118_20C_male_01001_Statistics	32.401	WT	SYP2GFP	5200000	160489
0.840544	0.75731	LP	Male	DLW118	2021_07_22_DLW118_20C_male_01001_Statistics	30.7318	WT	SYP2GFP	5000000	162698
1	1	LP	Male	DLW118	2021_07_22_DLW118_20C_male_01001_Statistics	24.857	WT	SYP2GFP	3360000	135173
0.0664783	-0.24449	TZ	Male	DLW118	2021_07_22_DLW118_20C_male_01004_Statistics	41.9498	WT	SYP2GFP	4870000	116091
0.076066	-0.231709	TZ	Male	DLW118	2021_07_22_DLW118_20C_male_01004_Statistics	13.3196	WT	SYP2GFP	1240000	93095.9
0.0156843	-0.312204	TZ	Male	DLW118	2021_07_22_DLW118_20C_male_01004_Statistics	9.77137	WT	SYP2GFP	832911	85239.9
0.0916595	-0.210921	TZ	Male	DLW118	2021_07_22_DLW118_20C_male_01004_Statistics	7.11117	WT	SYP2GFP	596606	83897
0.0638463	-0.247999	TZ	Male	DLW118	2021_07_22_DLW118_20C_male_01004_Statistics	4.47398	WT	SYP2GFP	382681	85534.8
0.0400716	-0.279693	TZ	Male	DLW118	2021_07_22_DLW118_20C_male_01004_Statistics	6.5297	WT	SYP2GFP	583624	89379.9
0.00550186	-0.325779	TZ	Male	DLW118	2021_07_22_DLW118_20C_male_01004_Statistics	15.0518	WT	SYP2GFP	1610000	106964
0.132127	-0.156973	TZ	Male	DLW118	2021_07_22_DLW118_20C_male_01004_Statistics	10.9978	WT	SYP2GFP	946091	86025.5
0.104205	-0.194196	TZ	Male	DLW118	2021_07_22_DLW118_20C_male_01004_Statistics	10.4303	WT	SYP2GFP	987661	94691.5
0.167	-0.110483	TZ	Male	DLW118	2021_07_22_DLW118_20C_male_01004_Statistics	10.824	WT	SYP2GFP	1030000	95158.9
0.179887	-0.0933032	TZ	Male	DLW118	2021_07_22_DLW118_20C_male_01004_Statistics	10.2874	WT	SYP2GFP	945236	91882.9
0.196716	-0.0708687	TZ	Male	DLW118	2021_07_22_DLW118_20C_male_01004_Statistics	10.9092	WT	SYP2GFP	1120000	102666
0.21837	-0.0420011	TZ	Male	DLW118	2021_07_22_DLW118_20C_male_01004_Statistics	11.3584	WT	SYP2GFP	1070000	94203.4
0.290831	0.0545974	EP	Male	DLW118	2021_07_22_DLW118_20C_male_01004_Statistics	7.77044	WT	SYP2GFP	643243	82780.8
0.27773	0.0371321	EP	Male	DLW118	2021_07_22_DLW118_20C_male_01004_Statistics	14.8055	WT	SYP2GFP	1370000	92533.2
0.252689	0.00375013	EP	Male	DLW118	2021_07_22_DLW118_20C_male_01004_Statistics	17.4174	WT	SYP2GFP	1840000	105641
0.273555	0.031567	EP	Male	DLW118	2021_07_22_DLW118_20C_male_01004_Statistics	15.5047	WT	SYP2GFP	1800000	116094
0.293256	0.0578307	EP	Male	DLW118	2021_07_22_DLW118_20C_male_01004_Statistics	14.4751	WT	SYP2GFP	1580000	109153
0.359068	0.145565	EP	Male	DLW118	2021_07_22_DLW118_20C_male_01004_Statistics	18.569	WT	SYP2GFP	1730000	93166
0.333647	0.111676	EP	Male	DLW118	2021_07_22_DLW118_20C_male_01004_Statistics	16.6794	WT	SYP2GFP	1850000	110915
0.337943	0.117403	EP	Male	DLW118	2021_07_22_DLW118_20C_male_01004_Statistics	17.9186	WT	SYP2GFP	1820000	101570
0.377325	0.169903	EP	Male	DLW118	2021_07_22_DLW118_20C_male_01004_Statistics	19.1437	WT	SYP2GFP	2130000	111264
0.366329	0.155245	EP	Male	DLW118	2021_07_22_DLW118_20C_male_01004_Statistics	17.7733	WT	SYP2GFP	2000000	112528
0.425246	0.233787	EP	Male	DLW118	2021_07_22_DLW118_20C_male_01004_Statistics	18.8078	WT	SYP2GFP	1970000	104744
0.405712	0.207747	EP	Male	DLW118	2021_07_22_DLW118_20C_male_01004_Statistics	22.6974	WT	SYP2GFP	2580000	113669
0.40802	0.210824	EP	Male	DLW118	2021_07_22_DLW118_20C_male_01004_Statistics	18.5363	WT	SYP2GFP	1880000	101423
0.456904	0.275991	EP	Male	DLW118	2021_07_22_DLW118_20C_male_01004_Statistics	23.3714	WT	SYP2GFP	2440000	104401
0.44197	0.256083	EP	Male	DLW118	2021_07_22_DLW118_20C_male_01004_Statistics	19.904	WT	SYP2GFP	2420000	121584
0.471897	0.295979	EP	Male	DLW118	2021_07_22_DLW118_20C_male_01004_Statistics	29.5352	WT	SYP2GFP	3530000	119518
0.472727	0.297086	EP	Male	DLW118	2021_07_22_DLW118_20C_male_01004_Statistics	18.2292	WT	SYP2GFP	2090000	114651
0.512548	0.350172	MP	Male	DLW118	2021_07_22_DLW118_20C_male_01004_Statistics	35.8639	WT	SYP2GFP	4160000	115994
0.497643	0.330301	EP	Male	DLW118	2021_07_22_DLW118_20C_male_01004_Statistics	28.7864	WT	SYP2GFP	3140000	109079
0.559202	0.412367	MP	Male	DLW118	2021_07_22_DLW118_20C_male_01004_Statistics	31.6496	WT	SYP2GFP	3700000	116905
0.539923	0.386665	MP	Male	DLW118	2021_07_22_DLW118_20C_male_01004_Statistics	28.7448	WT	SYP2GFP	2880000	100192
0.588812	0.451839	MP	Male	DLW118	2021_07_22_DLW118_20C_male_01004_Statistics	30.4436	WT	SYP2GFP	3300000	108397
0.583258	0.444435	MP	Male	DLW118	2021_07_22_DLW118_20C_male_01004_Statistics	36.8639	WT	SYP2GFP	4850000	131565
0.631961	0.509363	MP	Male	DLW118	2021_07_22_DLW118_20C_male_01004_Statistics	24.2691	WT	SYP2GFP	2540000	104660
0.632471	0.510042	MP	Male	DLW118	2021_07_22_DLW118_20C_male_01004_Statistics	38.7784	WT	SYP2GFP	5260000	135643
0.612419	0.483311	MP	Male	DLW118	2021_07_22_DLW118_20C_male_01004_Statistics	33.3807	WT	SYP2GFP	4220000	126420
0.663468	0.551364	MP	Male	DLW118	2021_07_22_DLW118_20C_male_01004_Statistics	40.4743	WT	SYP2GFP	5320000	131441
0.754491	0.672709	LP	Male	DLW118	2021_07_22_DLW118_20C_male_01004_Statistics	42.4362	WT	SYP2GFP	6220000	146573
0.728988	0.63871	MP	Male	DLW118	2021_07_22_DLW118_20C_male_01004_Statistics	41.3673	WT	SYP2GFP	5740000	138757
0.68131	0.57515	MP	Male	DLW118	2021_07_22_DLW118_20C_male_01004_Statistics	33.5857	WT	SYP2GFP	3850000	114632
0.711391	0.615251	MP	Male	DLW118	2021_07_22_DLW118_20C_male_01004_Statistics	43.9977	WT	SYP2GFP	6080000	138189
0.71835	0.624529	MP	Male	DLW118	2021_07_22_DLW118_20C_male_01004_Statistics	32.8474	WT	SYP2GFP	3790000	115382
0.748962	0.665338	MP	Male	DLW118	2021_07_22_DLW118_20C_male_01004_Statistics	40.6668	WT	SYP2GFP	6010000	147786
0.683812	0.578485	MP	Male	DLW118	2021_07_22_DLW118_20C_male_01004_Statistics	41.0163	WT	SYP2GFP	5620000	137019
0.844485	0.792681	LP	Male	DLW118	2021_07_22_DLW118_20C_male_01004_Statistics	44.0688	WT	SYP2GFP	6660000	151127
0.824516	0.76606	LP	Male	DLW118	2021_07_22_DLW118_20C_male_01004_Statistics	48.2631	WT	SYP2GFP	7390000	153119
0.808138	0.744226	LP	Male	DLW118	2021_07_22_DLW118_20C_male_01004_Statistics	46.5044	WT	SYP2GFP	7500000	161275
0.778524	0.704747	LP	Male	DLW118	2021_07_22_DLW118_20C_male_01004_Statistics	45.3939	WT	SYP2GFP	6940000	152884
0.857902	0.810567	LP	Male	DLW118	2021_07_22_DLW118_20C_male_01004_Statistics	43.8179	WT	SYP2GFP	6280000	143320
0.785249	0.713713	LP	Male	DLW118	2021_07_22_DLW118_20C_male_01004_Statistics	40.2309	WT	SYP2GFP	5770000	143422
0.859681	0.812939	LP	Male	DLW118	2021_07_22_DLW118_20C_male_01004_Statistics	46.1353	WT	SYP2GFP	6730000	145875
0.930183	0.906926	LP	Male	DLW118	2021_07_22_DLW118_20C_male_01004_Statistics	42.7629	WT	SYP2GFP	5900000	137970
0.975628	0.967509	LP	Male	DLW118	2021_07_22_DLW118_20C_male_01004_Statistics	35.5368	WT	SYP2GFP	3870000	108901
0.929114	0.905501	LP	Male	DLW118	2021_07_22_DLW118_20C_male_01004_Statistics	43.7598	WT	SYP2GFP	5950000	135970
0.910948	0.881283	LP	Male	DLW118	2021_07_22_DLW118_20C_male_01004_Statistics	46.1497	WT	SYP2GFP	6130000	132829
0.955488	0.940661	LP	Male	DLW118	2021_07_22_DLW118_20C_male_01004_Statistics	43.1636	WT	SYP2GFP	5300000	122789
0.990129	0.98684	LP	Male	DLW118	2021_07_22_DLW118_20C_male_01004_Statistics	40.9718	WT	SYP2GFP	5490000	133995
0.0862102	-0.0906001	TZ	Male	DLW118	2021_07_22_DLW118_20C_male_01005_Statistics	11.26	WT	SYP2GFP	911117	80916.3
0.032761	-0.154391	TZ	Male	DLW118	2021_07_22_DLW118_20C_male_01005_Statistics	9.53	WT	SYP2GFP	606580	63649.5
0.103759	-0.0696558	TZ	Male	DLW118	2021_07_22_DLW118_20C_male_01005_Statistics	21.95	WT	SYP2GFP	2162820	98533.9
0.147284	-0.0177096	TZ	Male	DLW118	2021_07_22_DLW118_20C_male_01005_Statistics	36.16	WT	SYP2GFP	3880380	107311
0.0530005	-0.130236	TZ	Male	DLW118	2021_07_22_DLW118_20C_male_01005_Statistics	23.18	WT	SYP2GFP	2102680	90711
0.0882243	-0.0881963	TZ	Male	DLW118	2021_07_22_DLW118_20C_male_01005_Statistics	18.77	WT	SYP2GFP	1543110	82211.5
0.0106518	-0.180778	TZ	Male	DLW118	2021_07_22_DLW118_20C_male_01005_Statistics	17.29	WT	SYP2GFP	1255080	72589.9
0.290018	0.152643	EP	Male	DLW118	2021_07_22_DLW118_20C_male_01005_Statistics	33.1	WT	SYP2GFP	3031730	91593.1
0.270184	0.128971	EP	Male	DLW118	2021_07_22_DLW118_20C_male_01005_Statistics	40.52	WT	SYP2GFP	4641530	114549
0.310774	0.177415	EP	Male	DLW118	2021_07_22_DLW118_20C_male_01005_Statistics	39.05	WT	SYP2GFP	4597330	117729
0.177115	0.0178939	EP	Male	DLW118	2021_07_22_DLW118_20C_male_01005_Statistics	29.28	WT	SYP2GFP	3105520	106063
0.244206	0.0979667	EP	Male	DLW118	2021_07_22_DLW118_20C_male_01005_Statistics	45.91	WT	SYP2GFP	5051960	110041
0.287085	0.149142	EP	Male	DLW118	2021_07_22_DLW118_20C_male_01005_Statistics	45.01	WT	SYP2GFP	5090850	113105
0.216886	0.0653608	EP	Male	DLW118	2021_07_22_DLW118_20C_male_01005_Statistics	38.97	WT	SYP2GFP	4309460	110584
0.182613	0.024456	EP	Male	DLW118	2021_07_22_DLW118_20C_male_01005_Statistics	23.41	WT	SYP2GFP	2349890	100380
0.511948	0.417514	MP	Male	DLW118	2021_07_22_DLW118_20C_male_01005_Statistics	47.62	WT	SYP2GFP	5958550	125127
0.56718	0.483433	MP	Male	DLW118	2021_07_22_DLW118_20C_male_01005_Statistics	52.28	WT	SYP2GFP	6974370	133404
0.401502	0.285697	EP	Male	DLW118	2021_07_22_DLW118_20C_male_01005_Statistics	38.04	WT	SYP2GFP	3801120	99924.3
0.505818	0.410198	MP	Male	DLW118	2021_07_22_DLW118_20C_male_01005_Statistics	50.49	WT	SYP2GFP	6678530	132274
0.458591	0.353833	MP	Male	DLW118	2021_07_22_DLW118_20C_male_01005_Statistics	50.86	WT	SYP2GFP	6369560	125237
0.446294	0.339157	MP	Male	DLW118	2021_07_22_DLW118_20C_male_01005_Statistics	49.7	WT	SYP2GFP	6047950	121689
0.347466	0.221207	EP	Male	DLW118	2021_07_22_DLW118_20C_male_01005_Statistics	37.21	WT	SYP2GFP	3436570	92356.1
0.387012	0.268404	EP	Male	DLW118	2021_07_22_DLW118_20C_male_01005_Statistics	45.68	WT	SYP2GFP	4906180	107403
0.364165	0.241137	EP	Male	DLW118	2021_07_22_DLW118_20C_male_01005_Statistics	44.1	WT	SYP2GFP	4970200	112703
0.410417	0.296338	EP	Male	DLW118	2021_07_22_DLW118_20C_male_01005_Statistics	42.63	WT	SYP2GFP	5667570	132948
0.335993	0.207514	EP	Male	DLW118	2021_07_22_DLW118_20C_male_01005_Statistics	41.76	WT	SYP2GFP	4789050	114680
0.72728	0.674511	LP	Male	DLW118	2021_07_22_DLW118_20C_male_01005_Statistics	66.24	WT	SYP2GFP	10749800	162286
0.744942	0.69559	LP	Male	DLW118	2021_07_22_DLW118_20C_male_01005_Statistics	72.84	WT	SYP2GFP	10073600	138298
0.668979	0.604929	MP	Male	DLW118	2021_07_22_DLW118_20C_male_01005_Statistics	61.22	WT	SYP2GFP	9072270	148191
0.606141	0.529933	MP	Male	DLW118	2021_07_22_DLW118_20C_male_01005_Statistics	57.32	WT	SYP2GFP	7822350	136468
0.677423	0.615008	MP	Male	DLW118	2021_07_22_DLW118_20C_male_01005_Statistics	63.93	WT	SYP2GFP	9383020	146770
0.613472	0.538682	MP	Male	DLW118	2021_07_22_DLW118_20C_male_01005_Statistics	60.37	WT	SYP2GFP	8357060	138431
0.97783	0.97354	LP	Male	DLW118	2021_07_22_DLW118_20C_male_01005_Statistics	74.59	WT	SYP2GFP	9005530	120734
0.886215	0.864199	LP	Male	DLW118	2021_07_22_DLW118_20C_male_01005_Statistics	62.69	WT	SYP2GFP	9944870	158636
0.924231	0.909571	LP	Male	DLW118	2021_07_22_DLW118_20C_male_01005_Statistics	65.14	WT	SYP2GFP	8825080	135479
0.835242	0.803363	LP	Male	DLW118	2021_07_22_DLW118_20C_male_01005_Statistics	60.44	WT	SYP2GFP	8952270	148118
0.79098	0.750537	LP	Male	DLW118	2021_07_22_DLW118_20C_male_01005_Statistics	50.97	WT	SYP2GFP	7304990	143319
0.783783	0.741947	LP	Male	DLW118	2021_07_22_DLW118_20C_male_01005_Statistics	59.08	WT	SYP2GFP	8675400	146842
0.868066	0.842538	LP	Male	DLW118	2021_07_22_DLW118_20C_male_01005_Statistics	69.8	WT	SYP2GFP	11150700	159752
0.808899	0.771923	LP	Male	DLW118	2021_07_22_DLW118_20C_male_01005_Statistics	64.53	WT	SYP2GFP	8999700	139465
0.0444163	-0.0557138	TZ	Male	DLW118	2021_10_22_DLW118_20C_male_01_Statistics	17.16	WT	SYP2GFP	1706330	99436.5
0.00285689	-0.101628	TZ	Male	DLW118	2021_10_22_DLW118_20C_male_01_Statistics	18.16	WT	SYP2GFP	1841420	101400
0.0752233	-0.0216787	TZ	Male	DLW118	2021_10_22_DLW118_20C_male_01_Statistics	19.55	WT	SYP2GFP	2137200	109320
0.0658046	-0.0320844	TZ	Male	DLW118	2021_10_22_DLW118_20C_male_01_Statistics	16.65	WT	SYP2GFP	1728300	103802
0.0948459	0	EP	Male	DLW118	2021_10_22_DLW118_20C_male_01_Statistics	18.11	WT	SYP2GFP	1699990	93870.2
0.117595	0.025133	EP	Male	DLW118	2021_10_22_DLW118_20C_male_01_Statistics	14.58	WT	SYP2GFP	1420150	97404
0.0976438	0.00309112	EP	Male	DLW118	2021_10_22_DLW118_20C_male_01_Statistics	27.13	WT	SYP2GFP	3084110	113679
0.116426	0.0238411	EP	Male	DLW118	2021_10_22_DLW118_20C_male_01_Statistics	21.72	WT	SYP2GFP	2221160	102263
0.137668	0.0473095	EP	Male	DLW118	2021_10_22_DLW118_20C_male_01_Statistics	24.26	WT	SYP2GFP	2689450	110859
0.172115	0.0853659	EP	Male	DLW118	2021_10_22_DLW118_20C_male_01_Statistics	19.71	WT	SYP2GFP	2058450	104437
0.152543	0.0637427	EP	Male	DLW118	2021_10_22_DLW118_20C_male_01_Statistics	20.73	WT	SYP2GFP	2212770	106742
0.190221	0.105368	EP	Male	DLW118	2021_10_22_DLW118_20C_male_01_Statistics	24.19	WT	SYP2GFP	2753370	113823
0.239366	0.159664	EP	Male	DLW118	2021_10_22_DLW118_20C_male_01_Statistics	22.58	WT	SYP2GFP	2805930	124266
0.22116	0.13955	EP	Male	DLW118	2021_10_22_DLW118_20C_male_01_Statistics	25.88	WT	SYP2GFP	2999910	115916
0.26285	0.185608	EP	Male	DLW118	2021_10_22_DLW118_20C_male_01_Statistics	27.42	WT	SYP2GFP	3217320	117335
0.247952	0.169149	EP	Male	DLW118	2021_10_22_DLW118_20C_male_01_Statistics	32.4	WT	SYP2GFP	3720860	114841
0.290323	0.21596	EP	Male	DLW118	2021_10_22_DLW118_20C_male_01_Statistics	24.83	WT	SYP2GFP	2565470	103321
0.295479	0.221656	EP	Male	DLW118	2021_10_22_DLW118_20C_male_01_Statistics	28.44	WT	SYP2GFP	3446930	121200
0.333676	0.263856	EP	Male	DLW118	2021_10_22_DLW118_20C_male_01_Statistics	26.66	WT	SYP2GFP	2936280	110138
0.339165	0.26992	EP	Male	DLW118	2021_10_22_DLW118_20C_male_01_Statistics	38.22	WT	SYP2GFP	4654320	121777
0.297195	0.223552	EP	Male	DLW118	2021_10_22_DLW118_20C_male_01_Statistics	29.36	WT	SYP2GFP	3363830	114572
0.368187	0.301983	EP	Male	DLW118	2021_10_22_DLW118_20C_male_01_Statistics	37.39	WT	SYP2GFP	4481400	119856
0.328998	0.258687	EP	Male	DLW118	2021_10_22_DLW118_20C_male_01_Statistics	35.52	WT	SYP2GFP	3939680	110914
0.36689	0.30055	EP	Male	DLW118	2021_10_22_DLW118_20C_male_01_Statistics	36.6	WT	SYP2GFP	4199250	114734
0.388209	0.324103	EP	Male	DLW118	2021_10_22_DLW118_20C_male_01_Statistics	41.72	WT	SYP2GFP	5194690	124513
0.286847	0.21212	EP	Male	DLW118	2021_10_22_DLW118_20C_male_01_Statistics	19.14	WT	SYP2GFP	1850640	96689.7
0.418037	0.357057	MP	Male	DLW118	2021_10_22_DLW118_20C_male_01_Statistics	37.25	WT	SYP2GFP	4613290	123847
0.463637	0.407434	MP	Male	DLW118	2021_10_22_DLW118_20C_male_01_Statistics	46.55	WT	SYP2GFP	5562740	119500
0.440994	0.382419	MP	Male	DLW118	2021_10_22_DLW118_20C_male_01_Statistics	43.46	WT	SYP2GFP	5897360	135696
0.522762	0.472755	MP	Male	DLW118	2021_10_22_DLW118_20C_male_01_Statistics	47.09	WT	SYP2GFP	6094920	129431
0.410362	0.348577	MP	Male	DLW118	2021_10_22_DLW118_20C_male_01_Statistics	39.52	WT	SYP2GFP	4781560	120991
0.485958	0.432094	MP	Male	DLW118	2021_10_22_DLW118_20C_male_01_Statistics	39.8	WT	SYP2GFP	4990250	125383
0.507407	0.455791	MP	Male	DLW118	2021_10_22_DLW118_20C_male_01_Statistics	48.61	WT	SYP2GFP	6945460	142881
0.544421	0.496684	MP	Male	DLW118	2021_10_22_DLW118_20C_male_01_Statistics	53.22	WT	SYP2GFP	7722300	145101
0.590122	0.547173	MP	Male	DLW118	2021_10_22_DLW118_20C_male_01_Statistics	54.34	WT	SYP2GFP	7561980	139160
0.645105	0.607917	MP	Male	DLW118	2021_10_22_DLW118_20C_male_01_Statistics	55.98	WT	SYP2GFP	7770810	138814
0.695215	0.663279	MP	Male	DLW118	2021_10_22_DLW118_20C_male_01_Statistics	56.21	WT	SYP2GFP	8617510	153309
0.619024	0.579104	MP	Male	DLW118	2021_10_22_DLW118_20C_male_01_Statistics	56.7	WT	SYP2GFP	7956050	140318
0.568639	0.523439	MP	Male	DLW118	2021_10_22_DLW118_20C_male_01_Statistics	50	WT	SYP2GFP	6560270	131205
0.668383	0.633635	MP	Male	DLW118	2021_10_22_DLW118_20C_male_01_Statistics	60.59	WT	SYP2GFP	9053180	149417
0.844537	0.828247	LP	Male	DLW118	2021_10_22_DLW118_20C_male_01_Statistics	58.55	WT	SYP2GFP	8283580	141479
0.897246	0.886479	LP	Male	DLW118	2021_10_22_DLW118_20C_male_01_Statistics	53.38	WT	SYP2GFP	7233620	135512
0.748529	0.722179	LP	Male	DLW118	2021_10_22_DLW118_20C_male_01_Statistics	61.52	WT	SYP2GFP	8917990	144961
0.793104	0.771424	LP	Male	DLW118	2021_10_22_DLW118_20C_male_01_Statistics	56.89	WT	SYP2GFP	7731880	135909
0.835883	0.818686	LP	Male	DLW118	2021_10_22_DLW118_20C_male_01_Statistics	63.76	WT	SYP2GFP	8334090	130710
0.742393	0.7154	LP	Male	DLW118	2021_10_22_DLW118_20C_male_01_Statistics	61.8	WT	SYP2GFP	9473600	153294
0.904238	0.894203	LP	Male	DLW118	2021_10_22_DLW118_20C_male_01_Statistics	64.71	WT	SYP2GFP	8367240	129304
0.991666	0.990793	LP	Male	DLW118	2021_10_22_DLW118_20C_male_01_Statistics	50.31	WT	SYP2GFP	5726840	113831
0.982705	0.980893	LP	Male	DLW118	2021_10_22_DLW118_20C_male_01_Statistics	53.8	WT	SYP2GFP	6936980	128940
0.0941245	-0.0155026	TZ	Male	DLW118	2021_10_22_DLW118_20C_male_01001_Statistics	23.76	WT	SYP2GFP	1982500	83438.6
0.090059	-0.02006	TZ	Male	DLW118	2021_10_22_DLW118_20C_male_01001_Statistics	17.13	WT	SYP2GFP	1708720	99750.1
0.0828104	-0.0281858	TZ	Male	DLW118	2021_10_22_DLW118_20C_male_01001_Statistics	19.77	WT	SYP2GFP	1840530	93097.1
0.0336102	-0.0833401	TZ	Male	DLW118	2021_10_22_DLW118_20C_male_01001_Statistics	12.13	WT	SYP2GFP	975749	80441
0.0530853	-0.0615082	TZ	Male	DLW118	2021_10_22_DLW118_20C_male_01001_Statistics	24.65	WT	SYP2GFP	2201160	89296.6
0.0518478	-0.0628954	TZ	Male	DLW118	2021_10_22_DLW118_20C_male_01001_Statistics	16.99	WT	SYP2GFP	1545070	90940
0.00945407	-0.11042	TZ	Male	DLW118	2021_10_22_DLW118_20C_male_01001_Statistics	13.69	WT	SYP2GFP	1127200	82337.5
0.0207574	-0.0977483	TZ	Male	DLW118	2021_10_22_DLW118_20C_male_01001_Statistics	19.48	WT	SYP2GFP	1651860	84797.7
0.0114895	-0.108138	TZ	Male	DLW118	2021_10_22_DLW118_20C_male_01001_Statistics	14.17	WT	SYP2GFP	1231660	86920.3
0.205057	0.108855	EP	Male	DLW118	2021_10_22_DLW118_20C_male_01001_Statistics	23.71	WT	SYP2GFP	2543580	107279
0.185028	0.0864019	EP	Male	DLW118	2021_10_22_DLW118_20C_male_01001_Statistics	22.94	WT	SYP2GFP	2343950	102177
0.168534	0.0679123	EP	Male	DLW118	2021_10_22_DLW118_20C_male_01001_Statistics	22.13	WT	SYP2GFP	2038340	92107.5
0.188142	0.0898923	EP	Male	DLW118	2021_10_22_DLW118_20C_male_01001_Statistics	20.89	WT	SYP2GFP	1857650	88925.3
0.148654	0.0456262	EP	Male	DLW118	2021_10_22_DLW118_20C_male_01001_Statistics	20.37	WT	SYP2GFP	1732340	85043.7
0.146958	0.043725	EP	Male	DLW118	2021_10_22_DLW118_20C_male_01001_Statistics	22.32	WT	SYP2GFP	2173090	97360.7
0.129513	0.0241691	EP	Male	DLW118	2021_10_22_DLW118_20C_male_01001_Statistics	22.39	WT	SYP2GFP	2139400	95551.6
0.108386	0.000484363	EP	Male	DLW118	2021_10_22_DLW118_20C_male_01001_Statistics	18.58	WT	SYP2GFP	1647980	88696.4
0.300761	0.216141	EP	Male	DLW118	2021_10_22_DLW118_20C_male_01001_Statistics	30.37	WT	SYP2GFP	2914220	95957.2
0.284357	0.197752	EP	Male	DLW118	2021_10_22_DLW118_20C_male_01001_Statistics	27.02	WT	SYP2GFP	2780800	102916
0.297002	0.211926	EP	Male	DLW118	2021_10_22_DLW118_20C_male_01001_Statistics	25.17	WT	SYP2GFP	2435690	96769.6
0.246223	0.155003	EP	Male	DLW118	2021_10_22_DLW118_20C_male_01001_Statistics	27.45	WT	SYP2GFP	2897210	105545
0.262329	0.173057	EP	Male	DLW118	2021_10_22_DLW118_20C_male_01001_Statistics	22.66	WT	SYP2GFP	2140310	94453.2
0.258524	0.168792	EP	Male	DLW118	2021_10_22_DLW118_20C_male_01001_Statistics	28.12	WT	SYP2GFP	2755450	97989
0.222305	0.12819	EP	Male	DLW118	2021_10_22_DLW118_20C_male_01001_Statistics	24.28	WT	SYP2GFP	2243240	92390.4
0.223174	0.129165	EP	Male	DLW118	2021_10_22_DLW118_20C_male_01001_Statistics	24.94	WT	SYP2GFP	2585300	103661
0.493854	0.432601	MP	Male	DLW118	2021_10_22_DLW118_20C_male_01001_Statistics	49.67	WT	SYP2GFP	5640840	113566
0.441494	0.373905	MP	Male	DLW118	2021_10_22_DLW118_20C_male_01001_Statistics	36.45	WT	SYP2GFP	4184010	114788
0.506731	0.447037	MP	Male	DLW118	2021_10_22_DLW118_20C_male_01001_Statistics	47.3	WT	SYP2GFP	5634490	119122
0.480124	0.41721	MP	Male	DLW118	2021_10_22_DLW118_20C_male_01001_Statistics	41.96	WT	SYP2GFP	4292130	102291
0.463541	0.39862	MP	Male	DLW118	2021_10_22_DLW118_20C_male_01001_Statistics	42.84	WT	SYP2GFP	4932960	115148
0.41896	0.348644	MP	Male	DLW118	2021_10_22_DLW118_20C_male_01001_Statistics	45.03	WT	SYP2GFP	5022770	111543
0.394594	0.321329	EP	Male	DLW118	2021_10_22_DLW118_20C_male_01001_Statistics	40.2	WT	SYP2GFP	4406030	109603
0.343562	0.264121	EP	Male	DLW118	2021_10_22_DLW118_20C_male_01001_Statistics	36.79	WT	SYP2GFP	3710510	100856
0.440409	0.372689	MP	Male	DLW118	2021_10_22_DLW118_20C_male_01001_Statistics	40.65	WT	SYP2GFP	4053420	99715.1
0.348914	0.270121	EP	Male	DLW118	2021_10_22_DLW118_20C_male_01001_Statistics	28.57	WT	SYP2GFP	2832800	99153
0.32635	0.244826	EP	Male	DLW118	2021_10_22_DLW118_20C_male_01001_Statistics	26.93	WT	SYP2GFP	2805210	104167
0.364482	0.287573	EP	Male	DLW118	2021_10_22_DLW118_20C_male_01001_Statistics	30.75	WT	SYP2GFP	3019380	98191.2
0.391541	0.317906	EP	Male	DLW118	2021_10_22_DLW118_20C_male_01001_Statistics	41.2	WT	SYP2GFP	4047500	98240.3
0.588799	0.539036	MP	Male	DLW118	2021_10_22_DLW118_20C_male_01001_Statistics	56.71	WT	SYP2GFP	7042860	124191
0.608768	0.561422	MP	Male	DLW118	2021_10_22_DLW118_20C_male_01001_Statistics	53.38	WT	SYP2GFP	6785730	127121
0.561083	0.507967	MP	Male	DLW118	2021_10_22_DLW118_20C_male_01001_Statistics	53.3	WT	SYP2GFP	6589250	123626
0.625042	0.579666	MP	Male	DLW118	2021_10_22_DLW118_20C_male_01001_Statistics	51.38	WT	SYP2GFP	5774460	112387
0.536358	0.480249	MP	Male	DLW118	2021_10_22_DLW118_20C_male_01001_Statistics	53.25	WT	SYP2GFP	6130300	115123
0.576473	0.525219	MP	Male	DLW118	2021_10_22_DLW118_20C_male_01001_Statistics	47	WT	SYP2GFP	5144270	109453
0.531939	0.475295	MP	Male	DLW118	2021_10_22_DLW118_20C_male_01001_Statistics	45.97	WT	SYP2GFP	5147810	111982
0.643956	0.600868	MP	Male	DLW118	2021_10_22_DLW118_20C_male_01001_Statistics	57.86	WT	SYP2GFP	7675500	132656
0.6897	0.652148	MP	Male	DLW118	2021_10_22_DLW118_20C_male_01001_Statistics	59.91	WT	SYP2GFP	8455180	141131
0.740599	0.709206	LP	Male	DLW118	2021_10_22_DLW118_20C_male_01001_Statistics	64.99	WT	SYP2GFP	9506730	146280
0.705897	0.670305	LP	Male	DLW118	2021_10_22_DLW118_20C_male_01001_Statistics	60.48	WT	SYP2GFP	9331950	154298
0.724852	0.691554	LP	Male	DLW118	2021_10_22_DLW118_20C_male_01001_Statistics	55.99	WT	SYP2GFP	6962560	124354
0.657378	0.615915	MP	Male	DLW118	2021_10_22_DLW118_20C_male_01001_Statistics	49.34	WT	SYP2GFP	7262600	147195
0.683022	0.644662	MP	Male	DLW118	2021_10_22_DLW118_20C_male_01001_Statistics	54.07	WT	SYP2GFP	7203990	133235
0.76292	0.734229	LP	Male	DLW118	2021_10_22_DLW118_20C_male_01001_Statistics	63.73	WT	SYP2GFP	10120600	158804
0.802438	0.778529	LP	Male	DLW118	2021_10_22_DLW118_20C_male_01001_Statistics	61.06	WT	SYP2GFP	9659590	158198
0.846488	0.827911	LP	Male	DLW118	2021_10_22_DLW118_20C_male_01001_Statistics	58.14	WT	SYP2GFP	8995470	154721
0.777447	0.750515	LP	Male	DLW118	2021_10_22_DLW118_20C_male_01001_Statistics	66.87	WT	SYP2GFP	11527800	172391
0.81819	0.796187	LP	Male	DLW118	2021_10_22_DLW118_20C_male_01001_Statistics	62.21	WT	SYP2GFP	9673580	155499
0.781186	0.754705	LP	Male	DLW118	2021_10_22_DLW118_20C_male_01001_Statistics	60.4	WT	SYP2GFP	7463020	123560
0.985214	0.983424	LP	Male	DLW118	2021_10_22_DLW118_20C_male_01001_Statistics	65.82	WT	SYP2GFP	9673180	146964
0.937334	0.929751	LP	Male	DLW118	2021_10_22_DLW118_20C_male_01001_Statistics	61.18	WT	SYP2GFP	8959560	146446
0.886555	0.872827	LP	Male	DLW118	2021_10_22_DLW118_20C_male_01001_Statistics	61.78	WT	SYP2GFP	9099010	147281
0.856464	0.839094	LP	Male	DLW118	2021_10_22_DLW118_20C_male_01001_Statistics	62.24	WT	SYP2GFP	9543660	153336
0.927002	0.918168	LP	Male	DLW118	2021_10_22_DLW118_20C_male_01001_Statistics	62.48	WT	SYP2GFP	8047230	128797
0.979513	0.977034	LP	Male	DLW118	2021_10_22_DLW118_20C_male_01001_Statistics	63.09	WT	SYP2GFP	9044940	143366
0.933298	0.925226	LP	Male	DLW118	2021_10_22_DLW118_20C_male_01001_Statistics	59.59	WT	SYP2GFP	6888300	115595
0.86143	0.84466	LP	Male	DLW118	2021_10_22_DLW118_20C_male_01001_Statistics	58.02	WT	SYP2GFP	7855040	135385
0.197506	-0.0361752	TZ	Male	DLW118	2021_10_22_DLW118_20C_male_01002_Statistics	22.33	WT	SYP2GFP	2100770	94078.4
0.221619	-0.00504033	TZ	Male	DLW118	2021_10_22_DLW118_20C_male_01002_Statistics	27.76	WT	SYP2GFP	2790430	100520
0.166165	-0.0766428	TZ	Male	DLW118	2021_10_22_DLW118_20C_male_01002_Statistics	22.79	WT	SYP2GFP	2117250	92902.6
0.185671	-0.0514571	TZ	Male	DLW118	2021_10_22_DLW118_20C_male_01002_Statistics	24.94	WT	SYP2GFP	2409320	96604.7
0.19007	-0.0457763	TZ	Male	DLW118	2021_10_22_DLW118_20C_male_01002_Statistics	25.13	WT	SYP2GFP	2501160	99528.8
0.153337	-0.0932063	TZ	Male	DLW118	2021_10_22_DLW118_20C_male_01002_Statistics	24.3	WT	SYP2GFP	2421690	99658
0.133613	-0.118674	TZ	Male	DLW118	2021_10_22_DLW118_20C_male_01002_Statistics	12.93	WT	SYP2GFP	1077110	83303.2
0.120426	-0.135701	TZ	Male	DLW118	2021_10_22_DLW118_20C_male_01002_Statistics	17.1	WT	SYP2GFP	1634630	95592.4
0.0927061	-0.171492	TZ	Male	DLW118	2021_10_22_DLW118_20C_male_01002_Statistics	19.89	WT	SYP2GFP	1718510	86400.7
0.115218	-0.142425	TZ	Male	DLW118	2021_10_22_DLW118_20C_male_01002_Statistics	22.75	WT	SYP2GFP	2079400	91402.2
0.0792945	-0.188809	TZ	Male	DLW118	2021_10_22_DLW118_20C_male_01002_Statistics	19.45	WT	SYP2GFP	1781160	91576.3
0.0198175	-0.265606	TZ	Male	DLW118	2021_10_22_DLW118_20C_male_01002_Statistics	19.69	WT	SYP2GFP	1734170	88073.6
0.425583	0.258316	EP	Male	DLW118	2021_10_22_DLW118_20C_male_01002_Statistics	38.9	WT	SYP2GFP	4203600	108062
0.410318	0.238607	EP	Male	DLW118	2021_10_22_DLW118_20C_male_01002_Statistics	41.53	WT	SYP2GFP	4840940	116565
0.363391	0.178014	EP	Male	DLW118	2021_10_22_DLW118_20C_male_01002_Statistics	35.92	WT	SYP2GFP	3809170	106046
0.382901	0.203205	EP	Male	DLW118	2021_10_22_DLW118_20C_male_01002_Statistics	30.34	WT	SYP2GFP	2884030	95057
0.394839	0.21862	EP	Male	DLW118	2021_10_22_DLW118_20C_male_01002_Statistics	44.48	WT	SYP2GFP	4961970	111555
0.315884	0.116673	EP	Male	DLW118	2021_10_22_DLW118_20C_male_01002_Statistics	29.96	WT	SYP2GFP	2959230	98772.7
0.334402	0.140584	EP	Male	DLW118	2021_10_22_DLW118_20C_male_01002_Statistics	39.71	WT	SYP2GFP	4072390	102553
0.338393	0.145737	EP	Male	DLW118	2021_10_22_DLW118_20C_male_01002_Statistics	23.01	WT	SYP2GFP	2107800	91603.7
0.253019	0.0355032	EP	Male	DLW118	2021_10_22_DLW118_20C_male_01002_Statistics	24.46	WT	SYP2GFP	2619010	107073
0.267038	0.0536038	EP	Male	DLW118	2021_10_22_DLW118_20C_male_01002_Statistics	28.73	WT	SYP2GFP	2961000	103063
0.284209	0.0757751	EP	Male	DLW118	2021_10_22_DLW118_20C_male_01002_Statistics	30.64	WT	SYP2GFP	3098700	101133
0.294716	0.0893419	EP	Male	DLW118	2021_10_22_DLW118_20C_male_01002_Statistics	28.51	WT	SYP2GFP	2617090	91795.5
0.225533	1.26713e-05	EP	Male	DLW118	2021_10_22_DLW118_20C_male_01002_Statistics	28.44	WT	SYP2GFP	2926900	102915
0.43729	0.273432	EP	Male	DLW118	2021_10_22_DLW118_20C_male_01002_Statistics	46.16	WT	SYP2GFP	5512390	119419
0.562414	0.434991	MP	Male	DLW118	2021_10_22_DLW118_20C_male_01002_Statistics	46.58	WT	SYP2GFP	6116360	131309
0.548942	0.417596	MP	Male	DLW118	2021_10_22_DLW118_20C_male_01002_Statistics	48.98	WT	SYP2GFP	6548740	133702
0.580841	0.458784	MP	Male	DLW118	2021_10_22_DLW118_20C_male_01002_Statistics	44.2	WT	SYP2GFP	5020010	113575
0.605282	0.490343	MP	Male	DLW118	2021_10_22_DLW118_20C_male_01002_Statistics	51.58	WT	SYP2GFP	7124580	138127
0.494163	0.346866	MP	Male	DLW118	2021_10_22_DLW118_20C_male_01002_Statistics	44.29	WT	SYP2GFP	4813540	108682
0.488482	0.339531	MP	Male	DLW118	2021_10_22_DLW118_20C_male_01002_Statistics	51.71	WT	SYP2GFP	6431720	124381
0.521266	0.381862	MP	Male	DLW118	2021_10_22_DLW118_20C_male_01002_Statistics	46.42	WT	SYP2GFP	5959340	128379
0.541669	0.408206	MP	Male	DLW118	2021_10_22_DLW118_20C_male_01002_Statistics	39.41	WT	SYP2GFP	4330940	109894
0.468266	0.313428	EP	Male	DLW118	2021_10_22_DLW118_20C_male_01002_Statistics	44.87	WT	SYP2GFP	5537460	123411
0.828601	0.778691	LP	Male	DLW118	2021_10_22_DLW118_20C_male_01002_Statistics	53.59	WT	SYP2GFP	8213940	153274
0.868151	0.829757	LP	Male	DLW118	2021_10_22_DLW118_20C_male_01002_Statistics	52.42	WT	SYP2GFP	6363190	121389
0.80641	0.750037	LP	Male	DLW118	2021_10_22_DLW118_20C_male_01002_Statistics	59.67	WT	SYP2GFP	9978080	167221
0.865564	0.826418	LP	Male	DLW118	2021_10_22_DLW118_20C_male_01002_Statistics	52.92	WT	SYP2GFP	8315160	157127
0.846347	0.801604	LP	Male	DLW118	2021_10_22_DLW118_20C_male_01002_Statistics	56.17	WT	SYP2GFP	8344670	148561
0.804346	0.747373	LP	Male	DLW118	2021_10_22_DLW118_20C_male_01002_Statistics	49.89	WT	SYP2GFP	6368510	127651
0.78934	0.727996	LP	Male	DLW118	2021_10_22_DLW118_20C_male_01002_Statistics	51.39	WT	SYP2GFP	7267200	141413
0.839739	0.793071	LP	Male	DLW118	2021_10_22_DLW118_20C_male_01002_Statistics	45.48	WT	SYP2GFP	5358210	117815
0.767672	0.700019	LP	Male	DLW118	2021_10_22_DLW118_20C_male_01002_Statistics	54.35	WT	SYP2GFP	7437810	136850
0.745365	0.671217	LP	Male	DLW118	2021_10_22_DLW118_20C_male_01002_Statistics	61.43	WT	SYP2GFP	9942360	161849
0.723428	0.642892	MP	Male	DLW118	2021_10_22_DLW118_20C_male_01002_Statistics	57.88	WT	SYP2GFP	8752900	151225
0.684514	0.592646	MP	Male	DLW118	2021_10_22_DLW118_20C_male_01002_Statistics	53.65	WT	SYP2GFP	6966890	129858
0.653916	0.553139	MP	Male	DLW118	2021_10_22_DLW118_20C_male_01002_Statistics	57.1	WT	SYP2GFP	8256870	144604
0.629044	0.521024	MP	Male	DLW118	2021_10_22_DLW118_20C_male_01002_Statistics	56.24	WT	SYP2GFP	7717190	137219
0.70218	0.615457	MP	Male	DLW118	2021_10_22_DLW118_20C_male_01002_Statistics	57.53	WT	SYP2GFP	8702420	151268
0.621724	0.511573	MP	Male	DLW118	2021_10_22_DLW118_20C_male_01002_Statistics	44.18	WT	SYP2GFP	5920430	134007
0.641702	0.537367	MP	Male	DLW118	2021_10_22_DLW118_20C_male_01002_Statistics	46.78	WT	SYP2GFP	5335880	114063
0.985203	0.980894	LP	Male	DLW118	2021_10_22_DLW118_20C_male_01002_Statistics	52.19	WT	SYP2GFP	7276070	139415
0.939508	0.921894	LP	Male	DLW118	2021_10_22_DLW118_20C_male_01002_Statistics	48.49	WT	SYP2GFP	7100010	146422
0.927606	0.906525	LP	Male	DLW118	2021_10_22_DLW118_20C_male_01002_Statistics	55.89	WT	SYP2GFP	9075000	162373
0.900109	0.871022	LP	Male	DLW118	2021_10_22_DLW118_20C_male_01002_Statistics	50.58	WT	SYP2GFP	8055680	159266
0.971009	0.962567	LP	Male	DLW118	2021_10_22_DLW118_20C_male_01002_Statistics	51.36	WT	SYP2GFP	6283380	122340
0.885931	0.852715	LP	Male	DLW118	2021_10_22_DLW118_20C_male_01002_Statistics	52.2	WT	SYP2GFP	7206260	138051
0.920728	0.897645	LP	Male	DLW118	2021_10_22_DLW118_20C_male_01002_Statistics	47.12	WT	SYP2GFP	6297050	133639
0.0261811	-0.202833	TZ	Male	DLW118	2021_10_22_DLW118_20C_male_01003_Statistics	8.67	WT	SYP2GFP	665287	76734.4
0.00131085	-0.233552	TZ	Male	DLW118	2021_10_22_DLW118_20C_male_01003_Statistics	8.63	WT	SYP2GFP	715664	82927.5
0.0321797	-0.195423	TZ	Male	DLW118	2021_10_22_DLW118_20C_male_01003_Statistics	9.85	WT	SYP2GFP	812323	82469.3
0.00730912	-0.226143	TZ	Male	DLW118	2021_10_22_DLW118_20C_male_01003_Statistics	13	WT	SYP2GFP	1018830	78371.5
0.0433727	-0.181598	TZ	Male	DLW118	2021_10_22_DLW118_20C_male_01003_Statistics	12.14	WT	SYP2GFP	988325	81410.6
0.0788342	-0.137797	TZ	Male	DLW118	2021_10_22_DLW118_20C_male_01003_Statistics	25.17	WT	SYP2GFP	2089210	83004
0.0735208	-0.14436	TZ	Male	DLW118	2021_10_22_DLW118_20C_male_01003_Statistics	13.55	WT	SYP2GFP	1261030	93064.9
0.0568223	-0.164986	TZ	Male	DLW118	2021_10_22_DLW118_20C_male_01003_Statistics	10.96	WT	SYP2GFP	899251	82048.4
0.0987769	-0.113164	TZ	Male	DLW118	2021_10_22_DLW118_20C_male_01003_Statistics	13.02	WT	SYP2GFP	980179	75282.6
0.129505	-0.07521	TZ	Male	DLW118	2021_10_22_DLW118_20C_male_01003_Statistics	12.53	WT	SYP2GFP	897756	71648.5
0.18042	-0.0123218	TZ	Male	DLW118	2021_10_22_DLW118_20C_male_01003_Statistics	13.91	WT	SYP2GFP	1157450	83209.9
0.149985	-0.0499138	TZ	Male	DLW118	2021_10_22_DLW118_20C_male_01003_Statistics	13.58	WT	SYP2GFP	991534	73014.3
0.181107	-0.0114721	TZ	Male	DLW118	2021_10_22_DLW118_20C_male_01003_Statistics	16.24	WT	SYP2GFP	1291310	79514.2
0.298781	0.133875	EP	Male	DLW118	2021_10_22_DLW118_20C_male_01003_Statistics	19.95	WT	SYP2GFP	1705850	85506.3
0.288387	0.121037	EP	Male	DLW118	2021_10_22_DLW118_20C_male_01003_Statistics	20.93	WT	SYP2GFP	1741470	83204.5
0.230094	0.0490343	EP	Male	DLW118	2021_10_22_DLW118_20C_male_01003_Statistics	18.45	WT	SYP2GFP	1461880	79234.7
0.253113	0.0774671	EP	Male	DLW118	2021_10_22_DLW118_20C_male_01003_Statistics	21.76	WT	SYP2GFP	2118830	97372.7
0.270466	0.0989006	EP	Male	DLW118	2021_10_22_DLW118_20C_male_01003_Statistics	20.54	WT	SYP2GFP	1639240	79807.2
0.23864	0.0595906	EP	Male	DLW118	2021_10_22_DLW118_20C_male_01003_Statistics	15.65	WT	SYP2GFP	1284170	82055.6
0.218549	0.0347745	EP	Male	DLW118	2021_10_22_DLW118_20C_male_01003_Statistics	24.62	WT	SYP2GFP	2110130	85708
0.205289	0.0183962	EP	Male	DLW118	2021_10_22_DLW118_20C_male_01003_Statistics	16.66	WT	SYP2GFP	1406110	84400.4
0.386512	0.242237	EP	Male	DLW118	2021_10_22_DLW118_20C_male_01003_Statistics	36.96	WT	SYP2GFP	3710450	100391
0.369095	0.220725	EP	Male	DLW118	2021_10_22_DLW118_20C_male_01003_Statistics	35.54	WT	SYP2GFP	3279170	92267
0.35632	0.204946	EP	Male	DLW118	2021_10_22_DLW118_20C_male_01003_Statistics	28.61	WT	SYP2GFP	2941720	102821
0.330766	0.173382	EP	Male	DLW118	2021_10_22_DLW118_20C_male_01003_Statistics	23.39	WT	SYP2GFP	1934520	82707.1
0.350767	0.198086	EP	Male	DLW118	2021_10_22_DLW118_20C_male_01003_Statistics	32.43	WT	SYP2GFP	3310360	102077
0.330195	0.172677	EP	Male	DLW118	2021_10_22_DLW118_20C_male_01003_Statistics	21.75	WT	SYP2GFP	1942820	89325.1
0.493568	0.37447	MP	Male	DLW118	2021_10_22_DLW118_20C_male_01003_Statistics	38.75	WT	SYP2GFP	3400510	87755.1
0.50031	0.382798	MP	Male	DLW118	2021_10_22_DLW118_20C_male_01003_Statistics	41.26	WT	SYP2GFP	4401800	106684
0.461257	0.33456	MP	Male	DLW118	2021_10_22_DLW118_20C_male_01003_Statistics	33.6	WT	SYP2GFP	3116210	92744.3
0.401874	0.261212	EP	Male	DLW118	2021_10_22_DLW118_20C_male_01003_Statistics	31.22	WT	SYP2GFP	2860140	91612.4
0.429205	0.294971	EP	Male	DLW118	2021_10_22_DLW118_20C_male_01003_Statistics	36.77	WT	SYP2GFP	3627070	98642.1
0.461235	0.334534	MP	Male	DLW118	2021_10_22_DLW118_20C_male_01003_Statistics	38.28	WT	SYP2GFP	3678320	96089.9
0.469235	0.344415	MP	Male	DLW118	2021_10_22_DLW118_20C_male_01003_Statistics	39.96	WT	SYP2GFP	4156550	104018
0.415256	0.277742	EP	Male	DLW118	2021_10_22_DLW118_20C_male_01003_Statistics	37.55	WT	SYP2GFP	3748090	99816
0.566855	0.464992	MP	Male	DLW118	2021_10_22_DLW118_20C_male_01003_Statistics	38.72	WT	SYP2GFP	3491400	90170.5
0.522759	0.410526	MP	Male	DLW118	2021_10_22_DLW118_20C_male_01003_Statistics	42.73	WT	SYP2GFP	4295920	100536
0.544053	0.436827	MP	Male	DLW118	2021_10_22_DLW118_20C_male_01003_Statistics	42.47	WT	SYP2GFP	4559760	107364
0.585656	0.488214	MP	Male	DLW118	2021_10_22_DLW118_20C_male_01003_Statistics	43.88	WT	SYP2GFP	4777910	108886
0.662597	0.58325	MP	Male	DLW118	2021_10_22_DLW118_20C_male_01003_Statistics	45.06	WT	SYP2GFP	5209000	115601
0.599306	0.505075	MP	Male	DLW118	2021_10_22_DLW118_20C_male_01003_Statistics	43.85	WT	SYP2GFP	4443280	101329
0.630624	0.543758	MP	Male	DLW118	2021_10_22_DLW118_20C_male_01003_Statistics	42.85	WT	SYP2GFP	4528030	105672
0.664268	0.585313	MP	Male	DLW118	2021_10_22_DLW118_20C_male_01003_Statistics	51.6	WT	SYP2GFP	6439340	124793
0.627617	0.540044	MP	Male	DLW118	2021_10_22_DLW118_20C_male_01003_Statistics	47.43	WT	SYP2GFP	5344120	112674
0.77144	0.71769	LP	Male	DLW118	2021_10_22_DLW118_20C_male_01003_Statistics	57.38	WT	SYP2GFP	7719060	134525
0.728814	0.665039	MP	Male	DLW118	2021_10_22_DLW118_20C_male_01003_Statistics	50.62	WT	SYP2GFP	5429070	107251
0.768017	0.713462	LP	Male	DLW118	2021_10_22_DLW118_20C_male_01003_Statistics	52.81	WT	SYP2GFP	7916430	149904
0.698261	0.6273	MP	Male	DLW118	2021_10_22_DLW118_20C_male_01003_Statistics	55.1	WT	SYP2GFP	6475040	117514
0.728393	0.664519	MP	Male	DLW118	2021_10_22_DLW118_20C_male_01003_Statistics	58.37	WT	SYP2GFP	7986100	136819
0.749111	0.690109	LP	Male	DLW118	2021_10_22_DLW118_20C_male_01003_Statistics	53.39	WT	SYP2GFP	6553970	122757
0.700798	0.630434	MP	Male	DLW118	2021_10_22_DLW118_20C_male_01003_Statistics	59.58	WT	SYP2GFP	7649040	128383
0.818964	0.77639	LP	Male	DLW118	2021_10_22_DLW118_20C_male_01003_Statistics	55.75	WT	SYP2GFP	7667400	137532
0.8555	0.821518	LP	Male	DLW118	2021_10_22_DLW118_20C_male_01003_Statistics	49.88	WT	SYP2GFP	6479470	129901
0.830728	0.79092	LP	Male	DLW118	2021_10_22_DLW118_20C_male_01003_Statistics	52.75	WT	SYP2GFP	7397070	140229
0.800941	0.754128	LP	Male	DLW118	2021_10_22_DLW118_20C_male_01003_Statistics	52.26	WT	SYP2GFP	7996940	153022
0.831993	0.792483	LP	Male	DLW118	2021_10_22_DLW118_20C_male_01003_Statistics	51.4	WT	SYP2GFP	5652950	109980
0.782189	0.730967	LP	Male	DLW118	2021_10_22_DLW118_20C_male_01003_Statistics	59.69	WT	SYP2GFP	9300810	155819
0.873375	0.843596	LP	Male	DLW118	2021_10_22_DLW118_20C_male_01003_Statistics	58.27	WT	SYP2GFP	7738800	132809
0.912249	0.891612	LP	Male	DLW118	2021_10_22_DLW118_20C_male_01003_Statistics	57.6	WT	SYP2GFP	7287890	126526
0.962242	0.953363	LP	Male	DLW118	2021_10_22_DLW118_20C_male_01003_Statistics	55.75	WT	SYP2GFP	6717400	120491
0.866339	0.834905	LP	Male	DLW118	2021_10_22_DLW118_20C_male_01003_Statistics	49.8	WT	SYP2GFP	6512520	130773
0.890707	0.865004	LP	Male	DLW118	2021_10_22_DLW118_20C_male_01003_Statistics	53.89	WT	SYP2GFP	7681240	142536
0.932924	0.91715	LP	Male	DLW118	2021_10_22_DLW118_20C_male_01003_Statistics	51.98	WT	SYP2GFP	6719810	129277
0.976562	0.97105	LP	Male	DLW118	2021_10_22_DLW118_20C_male_01003_Statistics	49.5	WT	SYP2GFP	6201480	125282
0.931992	0.915998	LP	Male	DLW118	2021_10_22_DLW118_20C_male_01003_Statistics	48.93	WT	SYP2GFP	5457060	111528
0.898509	0.874642	LP	Male	DLW118	2021_10_22_DLW118_20C_male_01003_Statistics	50.86	WT	SYP2GFP	6059190	119135
0.968388	0.960954	LP	Male	DLW118	2021_10_22_DLW118_20C_male_01003_Statistics	51.55	WT	SYP2GFP	5579680	108238
0.096919	-0.00188595	TZ	Herm	DLW118	2022_01_17_DLW118_herm_01_Statistics	19.15	WT	SYP2GFP	2728290	142469
0.0812994	-0.0192145	TZ	Herm	DLW118	2022_01_17_DLW118_herm_01_Statistics	13.96	WT	SYP2GFP	1822090	130522
0.0836974	-0.0165542	TZ	Herm	DLW118	2022_01_17_DLW118_herm_01_Statistics	14.9	WT	SYP2GFP	2121400	142376
0.0596927	-0.0431852	TZ	Herm	DLW118	2022_01_17_DLW118_herm_01_Statistics	16.28	WT	SYP2GFP	2261960	138941
0.0337856	-0.0719268	TZ	Herm	DLW118	2022_01_17_DLW118_herm_01_Statistics	10.35	WT	SYP2GFP	1397760	135049
0.0100652	-0.0982423	TZ	Herm	DLW118	2022_01_17_DLW118_herm_01_Statistics	12.58	WT	SYP2GFP	1513100	120278
0.0232125	-0.0836567	TZ	Herm	DLW118	2022_01_17_DLW118_herm_01_Statistics	12.62	WT	SYP2GFP	1583020	125437
0.00331687	-0.105729	TZ	Herm	DLW118	2022_01_17_DLW118_herm_01_Statistics	12.9	WT	SYP2GFP	1627140	126135
0.194435	0.1063	EP	Herm	DLW118	2022_01_17_DLW118_herm_01_Statistics	26.02	WT	SYP2GFP	4169270	160233
0.178854	0.089013	EP	Herm	DLW118	2022_01_17_DLW118_herm_01_Statistics	22.96	WT	SYP2GFP	3364520	146538
0.186004	0.0969455	EP	Herm	DLW118	2022_01_17_DLW118_herm_01_Statistics	26.84	WT	SYP2GFP	4601640	171447
0.171761	0.0811449	EP	Herm	DLW118	2022_01_17_DLW118_herm_01_Statistics	14.08	WT	SYP2GFP	1981620	140740
0.182969	0.0935787	EP	Herm	DLW118	2022_01_17_DLW118_herm_01_Statistics	22.44	WT	SYP2GFP	3545660	158006
0.168056	0.077034	EP	Herm	DLW118	2022_01_17_DLW118_herm_01_Statistics	23.9	WT	SYP2GFP	3811220	159465
0.153055	0.0603922	EP	Herm	DLW118	2022_01_17_DLW118_herm_01_Statistics	24.45	WT	SYP2GFP	3574190	146184
0.156794	0.0645404	EP	Herm	DLW118	2022_01_17_DLW118_herm_01_Statistics	28.38	WT	SYP2GFP	4253520	149877
0.157985	0.0658609	EP	Herm	DLW118	2022_01_17_DLW118_herm_01_Statistics	22.5	WT	SYP2GFP	3446540	153180
0.142549	0.048736	EP	Herm	DLW118	2022_01_17_DLW118_herm_01_Statistics	20.47	WT	SYP2GFP	3026940	147872
0.1415	0.0475731	EP	Herm	DLW118	2022_01_17_DLW118_herm_01_Statistics	13.88	WT	SYP2GFP	2046620	147451
0.138503	0.0442475	EP	Herm	DLW118	2022_01_17_DLW118_herm_01_Statistics	22.12	WT	SYP2GFP	3125900	141316
0.131449	0.0364217	EP	Herm	DLW118	2022_01_17_DLW118_herm_01_Statistics	17.81	WT	SYP2GFP	2667310	149765
0.120598	0.0243838	EP	Herm	DLW118	2022_01_17_DLW118_herm_01_Statistics	21.27	WT	SYP2GFP	3337220	156898
0.130851	0.0357588	EP	Herm	DLW118	2022_01_17_DLW118_herm_01_Statistics	17.37	WT	SYP2GFP	2678850	154223
0.116828	0.0202013	EP	Herm	DLW118	2022_01_17_DLW118_herm_01_Statistics	20.99	WT	SYP2GFP	3034030	144546
0.108277	0.0107144	EP	Herm	DLW118	2022_01_17_DLW118_herm_01_Statistics	34.73	WT	SYP2GFP	4830040	139074
0.107068	0.00937345	EP	Herm	DLW118	2022_01_17_DLW118_herm_01_Statistics	18.34	WT	SYP2GFP	2752860	150101
0.0998818	0.00140096	EP	Herm	DLW118	2022_01_17_DLW118_herm_01_Statistics	17.65	WT	SYP2GFP	2443580	138446
0.314405	0.239394	EP	Herm	DLW118	2022_01_17_DLW118_herm_01_Statistics	38.58	WT	SYP2GFP	6425800	166558
0.299345	0.222688	EP	Herm	DLW118	2022_01_17_DLW118_herm_01_Statistics	22.9	WT	SYP2GFP	3784290	165253
0.304914	0.228865	EP	Herm	DLW118	2022_01_17_DLW118_herm_01_Statistics	22.96	WT	SYP2GFP	4171140	181670
0.314569	0.239577	EP	Herm	DLW118	2022_01_17_DLW118_herm_01_Statistics	34.44	WT	SYP2GFP	6082110	176600
0.307517	0.231753	EP	Herm	DLW118	2022_01_17_DLW118_herm_01_Statistics	35.28	WT	SYP2GFP	5727960	162357
0.284791	0.20654	EP	Herm	DLW118	2022_01_17_DLW118_herm_01_Statistics	24.09	WT	SYP2GFP	3818870	158525
0.275365	0.196084	EP	Herm	DLW118	2022_01_17_DLW118_herm_01_Statistics	26.96	WT	SYP2GFP	4699150	174301
0.295169	0.218054	EP	Herm	DLW118	2022_01_17_DLW118_herm_01_Statistics	23.73	WT	SYP2GFP	4168370	175658
0.285935	0.20781	EP	Herm	DLW118	2022_01_17_DLW118_herm_01_Statistics	19.09	WT	SYP2GFP	2962090	155164
0.296951	0.220031	EP	Herm	DLW118	2022_01_17_DLW118_herm_01_Statistics	27.72	WT	SYP2GFP	4563280	164620
0.280952	0.202282	EP	Herm	DLW118	2022_01_17_DLW118_herm_01_Statistics	25.84	WT	SYP2GFP	4291760	166090
0.275959	0.196743	EP	Herm	DLW118	2022_01_17_DLW118_herm_01_Statistics	28.69	WT	SYP2GFP	4445430	154947
0.270766	0.190982	EP	Herm	DLW118	2022_01_17_DLW118_herm_01_Statistics	32.49	WT	SYP2GFP	5558510	171084
0.256301	0.174934	EP	Herm	DLW118	2022_01_17_DLW118_herm_01_Statistics	27.55	WT	SYP2GFP	4237050	153795
0.262025	0.181285	EP	Herm	DLW118	2022_01_17_DLW118_herm_01_Statistics	24.88	WT	SYP2GFP	4284860	172221
0.242729	0.159876	EP	Herm	DLW118	2022_01_17_DLW118_herm_01_Statistics	27.29	WT	SYP2GFP	4439460	162677
0.24663	0.164204	EP	Herm	DLW118	2022_01_17_DLW118_herm_01_Statistics	25.57	WT	SYP2GFP	4300000	168166
0.240071	0.156928	EP	Herm	DLW118	2022_01_17_DLW118_herm_01_Statistics	29.66	WT	SYP2GFP	4854910	163685
0.254341	0.17276	EP	Herm	DLW118	2022_01_17_DLW118_herm_01_Statistics	29.71	WT	SYP2GFP	4968860	167245
0.252281	0.170474	EP	Herm	DLW118	2022_01_17_DLW118_herm_01_Statistics	34.35	WT	SYP2GFP	5780210	168274
0.260016	0.179055	EP	Herm	DLW118	2022_01_17_DLW118_herm_01_Statistics	30.19	WT	SYP2GFP	5019440	166262
0.232387	0.148403	EP	Herm	DLW118	2022_01_17_DLW118_herm_01_Statistics	24.9	WT	SYP2GFP	3963410	159173
0.234373	0.150607	EP	Herm	DLW118	2022_01_17_DLW118_herm_01_Statistics	27.65	WT	SYP2GFP	4332820	156702
0.224934	0.140135	EP	Herm	DLW118	2022_01_17_DLW118_herm_01_Statistics	29.45	WT	SYP2GFP	4947690	168003
0.216539	0.130822	EP	Herm	DLW118	2022_01_17_DLW118_herm_01_Statistics	22.62	WT	SYP2GFP	3488890	154239
0.207917	0.121256	EP	Herm	DLW118	2022_01_17_DLW118_herm_01_Statistics	28.95	WT	SYP2GFP	4466740	154292
0.217351	0.131722	EP	Herm	DLW118	2022_01_17_DLW118_herm_01_Statistics	28.83	WT	SYP2GFP	4737270	164317
0.205363	0.118423	EP	Herm	DLW118	2022_01_17_DLW118_herm_01_Statistics	30.84	WT	SYP2GFP	5285050	171370
0.206928	0.120159	EP	Herm	DLW118	2022_01_17_DLW118_herm_01_Statistics	27.98	WT	SYP2GFP	4667040	166799
0.403806	0.338577	MP	Herm	DLW118	2022_01_17_DLW118_herm_01_Statistics	31.31	WT	SYP2GFP	5441850	173805
0.407303	0.342456	MP	Herm	DLW118	2022_01_17_DLW118_herm_01_Statistics	27.83	WT	SYP2GFP	4838270	173851
0.406616	0.341695	MP	Herm	DLW118	2022_01_17_DLW118_herm_01_Statistics	30.65	WT	SYP2GFP	5342400	174303
0.391251	0.324648	EP	Herm	DLW118	2022_01_17_DLW118_herm_01_Statistics	36.32	WT	SYP2GFP	6371020	175414
0.369514	0.300533	EP	Herm	DLW118	2022_01_17_DLW118_herm_01_Statistics	32.13	WT	SYP2GFP	5910390	183952
0.38139	0.313708	EP	Herm	DLW118	2022_01_17_DLW118_herm_01_Statistics	33.97	WT	SYP2GFP	5640660	166048
0.375441	0.307109	EP	Herm	DLW118	2022_01_17_DLW118_herm_01_Statistics	35.29	WT	SYP2GFP	5835960	165371
0.390269	0.323559	EP	Herm	DLW118	2022_01_17_DLW118_herm_01_Statistics	37.1	WT	SYP2GFP	6719460	181118
0.388186	0.321249	EP	Herm	DLW118	2022_01_17_DLW118_herm_01_Statistics	37.98	WT	SYP2GFP	6849720	180351
0.365008	0.295535	EP	Herm	DLW118	2022_01_17_DLW118_herm_01_Statistics	35.64	WT	SYP2GFP	6406020	179742
0.353204	0.282439	EP	Herm	DLW118	2022_01_17_DLW118_herm_01_Statistics	30.45	WT	SYP2GFP	5126100	168345
0.366235	0.296896	EP	Herm	DLW118	2022_01_17_DLW118_herm_01_Statistics	30.48	WT	SYP2GFP	5171400	169665
0.355701	0.285209	EP	Herm	DLW118	2022_01_17_DLW118_herm_01_Statistics	33.23	WT	SYP2GFP	5821740	175195
0.344323	0.272586	EP	Herm	DLW118	2022_01_17_DLW118_herm_01_Statistics	33.82	WT	SYP2GFP	5643920	166881
0.339419	0.267146	EP	Herm	DLW118	2022_01_17_DLW118_herm_01_Statistics	34.04	WT	SYP2GFP	6256060	183786
0.331897	0.2588	EP	Herm	DLW118	2022_01_17_DLW118_herm_01_Statistics	16.53	WT	SYP2GFP	2763570	167185
0.319605	0.245164	EP	Herm	DLW118	2022_01_17_DLW118_herm_01_Statistics	35.04	WT	SYP2GFP	5891720	168143
0.328654	0.255202	EP	Herm	DLW118	2022_01_17_DLW118_herm_01_Statistics	33.73	WT	SYP2GFP	5754230	170597
0.323828	0.249849	EP	Herm	DLW118	2022_01_17_DLW118_herm_01_Statistics	32.43	WT	SYP2GFP	5755850	177485
0.60523	0.562039	MP	Herm	DLW118	2022_01_17_DLW118_herm_01_Statistics	33.61	WT	SYP2GFP	5247820	156139
0.594875	0.550551	MP	Herm	DLW118	2022_01_17_DLW118_herm_01_Statistics	31.92	WT	SYP2GFP	5276720	165311
0.583067	0.537451	MP	Herm	DLW118	2022_01_17_DLW118_herm_01_Statistics	36.96	WT	SYP2GFP	6125650	165737
0.578601	0.532496	MP	Herm	DLW118	2022_01_17_DLW118_herm_01_Statistics	40.85	WT	SYP2GFP	7506400	183755
0.55885	0.510585	MP	Herm	DLW118	2022_01_17_DLW118_herm_01_Statistics	39.68	WT	SYP2GFP	7204100	181555
0.559373	0.511165	MP	Herm	DLW118	2022_01_17_DLW118_herm_01_Statistics	25.69	WT	SYP2GFP	4061610	158101
0.537981	0.487433	MP	Herm	DLW118	2022_01_17_DLW118_herm_01_Statistics	30.49	WT	SYP2GFP	5222840	171297
0.537944	0.487391	MP	Herm	DLW118	2022_01_17_DLW118_herm_01_Statistics	23.53	WT	SYP2GFP	3514030	149343
0.519348	0.466761	MP	Herm	DLW118	2022_01_17_DLW118_herm_01_Statistics	20.46	WT	SYP2GFP	3023880	147795
0.514262	0.461118	MP	Herm	DLW118	2022_01_17_DLW118_herm_01_Statistics	21.31	WT	SYP2GFP	3265960	153260
0.483856	0.427385	MP	Herm	DLW118	2022_01_17_DLW118_herm_01_Statistics	35.28	WT	SYP2GFP	6021700	170683
0.489263	0.433384	MP	Herm	DLW118	2022_01_17_DLW118_herm_01_Statistics	29.31	WT	SYP2GFP	4600710	156967
0.492656	0.437148	MP	Herm	DLW118	2022_01_17_DLW118_herm_01_Statistics	50.84	WT	SYP2GFP	9701630	190827
0.469186	0.41111	MP	Herm	DLW118	2022_01_17_DLW118_herm_01_Statistics	18.53	WT	SYP2GFP	2762610	149089
0.473964	0.416411	MP	Herm	DLW118	2022_01_17_DLW118_herm_01_Statistics	38.7	WT	SYP2GFP	7382340	190758
0.450484	0.390363	MP	Herm	DLW118	2022_01_17_DLW118_herm_01_Statistics	40.83	WT	SYP2GFP	7916690	193894
0.445082	0.384369	MP	Herm	DLW118	2022_01_17_DLW118_herm_01_Statistics	16.78	WT	SYP2GFP	2540950	151427
0.441213	0.380077	MP	Herm	DLW118	2022_01_17_DLW118_herm_01_Statistics	31.65	WT	SYP2GFP	5914780	186881
0.427437	0.364794	MP	Herm	DLW118	2022_01_17_DLW118_herm_01_Statistics	26.45	WT	SYP2GFP	4661610	176242
0.427134	0.364457	MP	Herm	DLW118	2022_01_17_DLW118_herm_01_Statistics	31.21	WT	SYP2GFP	5961850	191024
0.426914	0.364213	MP	Herm	DLW118	2022_01_17_DLW118_herm_01_Statistics	32.49	WT	SYP2GFP	5401280	166244
0.740615	0.712236	LP	Herm	DLW118	2022_01_17_DLW118_herm_01_Statistics	44.34	WT	SYP2GFP	7055260	159117
0.729381	0.699773	LP	Herm	DLW118	2022_01_17_DLW118_herm_01_Statistics	42.16	WT	SYP2GFP	7050360	167229
0.726617	0.696706	LP	Herm	DLW118	2022_01_17_DLW118_herm_01_Statistics	40.29	WT	SYP2GFP	6519320	161810
0.71269	0.681256	LP	Herm	DLW118	2022_01_17_DLW118_herm_01_Statistics	41.87	WT	SYP2GFP	6694330	159884
0.685629	0.651234	MP	Herm	DLW118	2022_01_17_DLW118_herm_01_Statistics	35	WT	SYP2GFP	5430440	155155
0.692858	0.659254	MP	Herm	DLW118	2022_01_17_DLW118_herm_01_Statistics	34.32	WT	SYP2GFP	5239090	152654
0.665001	0.628349	MP	Herm	DLW118	2022_01_17_DLW118_herm_01_Statistics	32.95	WT	SYP2GFP	5085520	154341
0.657512	0.620041	MP	Herm	DLW118	2022_01_17_DLW118_herm_01_Statistics	39.33	WT	SYP2GFP	6223710	158243
0.641521	0.6023	MP	Herm	DLW118	2022_01_17_DLW118_herm_01_Statistics	33.85	WT	SYP2GFP	5026770	148501
0.995911	0.995464	LP	Herm	DLW118	2022_01_17_DLW118_herm_01_Statistics	43.01	WT	SYP2GFP	6935940	161263
0.977588	0.975136	LP	Herm	DLW118	2022_01_17_DLW118_herm_01_Statistics	44.21	WT	SYP2GFP	7318120	165531
0.97128	0.968137	LP	Herm	DLW118	2022_01_17_DLW118_herm_01_Statistics	40.61	WT	SYP2GFP	6304930	155256
0.953547	0.948464	LP	Herm	DLW118	2022_01_17_DLW118_herm_01_Statistics	47.14	WT	SYP2GFP	7467070	158402
0.945721	0.939783	LP	Herm	DLW118	2022_01_17_DLW118_herm_01_Statistics	47.7	WT	SYP2GFP	7649790	160373
0.932733	0.925374	LP	Herm	DLW118	2022_01_17_DLW118_herm_01_Statistics	44.67	WT	SYP2GFP	7156910	160217
0.918912	0.91004	LP	Herm	DLW118	2022_01_17_DLW118_herm_01_Statistics	40.45	WT	SYP2GFP	6440470	159221
0.893886	0.882276	LP	Herm	DLW118	2022_01_17_DLW118_herm_01_Statistics	49.45	WT	SYP2GFP	7721110	156140
0.907966	0.897896	LP	Herm	DLW118	2022_01_17_DLW118_herm_01_Statistics	36.95	WT	SYP2GFP	5742100	155402
0.878886	0.865635	LP	Herm	DLW118	2022_01_17_DLW118_herm_01_Statistics	42.34	WT	SYP2GFP	6853060	161858
0.869276	0.854974	LP	Herm	DLW118	2022_01_17_DLW118_herm_01_Statistics	43.49	WT	SYP2GFP	6807480	156530
0.883048	0.870252	LP	Herm	DLW118	2022_01_17_DLW118_herm_01_Statistics	43.09	WT	SYP2GFP	6629410	153850
0.851936	0.835737	LP	Herm	DLW118	2022_01_17_DLW118_herm_01_Statistics	46.49	WT	SYP2GFP	7700040	165628
0.839705	0.822168	LP	Herm	DLW118	2022_01_17_DLW118_herm_01_Statistics	47.37	WT	SYP2GFP	8292790	175064
0.826169	0.80715	LP	Herm	DLW118	2022_01_17_DLW118_herm_01_Statistics	45.54	WT	SYP2GFP	7902150	173521
0.853479	0.837449	LP	Herm	DLW118	2022_01_17_DLW118_herm_01_Statistics	41.9	WT	SYP2GFP	6636430	158387
0.802236	0.780599	LP	Herm	DLW118	2022_01_17_DLW118_herm_01_Statistics	46.86	WT	SYP2GFP	7603690	162264
0.833022	0.814753	LP	Herm	DLW118	2022_01_17_DLW118_herm_01_Statistics	38.79	WT	SYP2GFP	6205840	159986
0.815037	0.7948	LP	Herm	DLW118	2022_01_17_DLW118_herm_01_Statistics	44.9	WT	SYP2GFP	7503660	167119
0.777857	0.753552	LP	Herm	DLW118	2022_01_17_DLW118_herm_01_Statistics	43.34	WT	SYP2GFP	7122240	164334
0.808708	0.787779	LP	Herm	DLW118	2022_01_17_DLW118_herm_01_Statistics	40.82	WT	SYP2GFP	6529650	159962
0.791598	0.768797	LP	Herm	DLW118	2022_01_17_DLW118_herm_01_Statistics	44.43	WT	SYP2GFP	7494220	168675
0.784519	0.760944	LP	Herm	DLW118	2022_01_17_DLW118_herm_01_Statistics	37.11	WT	SYP2GFP	6189280	166782
0.767014	0.741523	LP	Herm	DLW118	2022_01_17_DLW118_herm_01_Statistics	42.96	WT	SYP2GFP	7063100	164411
0.175691	-0.0206415	TZ	Herm	DLW118	2022_01_17_DLW118_herm_01002_Statistics	31.21	WT	SYP2GFP	4588550	147022
0.191681	-0.000843132	TZ	Herm	DLW118	2022_01_17_DLW118_herm_01002_Statistics	32.31	WT	SYP2GFP	4894330	151480
0.16154	-0.0381627	TZ	Herm	DLW118	2022_01_17_DLW118_herm_01002_Statistics	27.2	WT	SYP2GFP	3857210	141809
0.161661	-0.0380129	TZ	Herm	DLW118	2022_01_17_DLW118_herm_01002_Statistics	24.35	WT	SYP2GFP	3462050	142179
0.106451	-0.106372	TZ	Herm	DLW118	2022_01_17_DLW118_herm_01002_Statistics	25.91	WT	SYP2GFP	3946800	152327
0.0979082	-0.11695	TZ	Herm	DLW118	2022_01_17_DLW118_herm_01002_Statistics	24.46	WT	SYP2GFP	3855180	157612
0.0788543	-0.140543	TZ	Herm	DLW118	2022_01_17_DLW118_herm_01002_Statistics	28.07	WT	SYP2GFP	4206870	149871
0.0791217	-0.140211	TZ	Herm	DLW118	2022_01_17_DLW118_herm_01002_Statistics	18.47	WT	SYP2GFP	2785840	150831
0.0522042	-0.17354	TZ	Herm	DLW118	2022_01_17_DLW118_herm_01002_Statistics	18.96	WT	SYP2GFP	2642730	139384
0.0663582	-0.156015	TZ	Herm	DLW118	2022_01_17_DLW118_herm_01002_Statistics	17.89	WT	SYP2GFP	2628550	146928
0.0276081	-0.203995	TZ	Herm	DLW118	2022_01_17_DLW118_herm_01002_Statistics	14.78	WT	SYP2GFP	1865720	126233
0.0278849	-0.203652	TZ	Herm	DLW118	2022_01_17_DLW118_herm_01002_Statistics	16.97	WT	SYP2GFP	2141240	126178
0.00481338	-0.232218	TZ	Herm	DLW118	2022_01_17_DLW118_herm_01002_Statistics	10.79	WT	SYP2GFP	1321230	122449
0.327536	0.16737	EP	Herm	DLW118	2022_01_17_DLW118_herm_01002_Statistics	35.51	WT	SYP2GFP	6062780	170734
0.34486	0.18882	EP	Herm	DLW118	2022_01_17_DLW118_herm_01002_Statistics	32.16	WT	SYP2GFP	5584960	173662
0.345835	0.190028	EP	Herm	DLW118	2022_01_17_DLW118_herm_01002_Statistics	32.39	WT	SYP2GFP	5353600	165286
0.31063	0.146437	EP	Herm	DLW118	2022_01_17_DLW118_herm_01002_Statistics	40.76	WT	SYP2GFP	7315880	179487
0.304484	0.138828	EP	Herm	DLW118	2022_01_17_DLW118_herm_01002_Statistics	37.69	WT	SYP2GFP	6537050	173443
0.287689	0.118032	EP	Herm	DLW118	2022_01_17_DLW118_herm_01002_Statistics	26.54	WT	SYP2GFP	4214680	158805
0.316406	0.153588	EP	Herm	DLW118	2022_01_17_DLW118_herm_01002_Statistics	38.52	WT	SYP2GFP	6606470	171508
0.277199	0.105043	EP	Herm	DLW118	2022_01_17_DLW118_herm_01002_Statistics	30.66	WT	SYP2GFP	5172840	168716
0.297536	0.130225	EP	Herm	DLW118	2022_01_17_DLW118_herm_01002_Statistics	23.69	WT	SYP2GFP	4024130	169866
0.324117	0.163136	EP	Herm	DLW118	2022_01_17_DLW118_herm_01002_Statistics	32.27	WT	SYP2GFP	5384380	166854
0.279043	0.107327	EP	Herm	DLW118	2022_01_17_DLW118_herm_01002_Statistics	22.56	WT	SYP2GFP	3455990	153191
0.2625	0.0868432	EP	Herm	DLW118	2022_01_17_DLW118_herm_01002_Statistics	24.27	WT	SYP2GFP	3871380	159513
0.248522	0.0695365	EP	Herm	DLW118	2022_01_17_DLW118_herm_01002_Statistics	36.29	WT	SYP2GFP	5545670	152815
0.294801	0.126838	EP	Herm	DLW118	2022_01_17_DLW118_herm_01002_Statistics	32.68	WT	SYP2GFP	5243140	160439
0.253509	0.0757108	EP	Herm	DLW118	2022_01_17_DLW118_herm_01002_Statistics	25.46	WT	SYP2GFP	3797130	149141
0.203665	0.0139954	EP	Herm	DLW118	2022_01_17_DLW118_herm_01002_Statistics	33.02	WT	SYP2GFP	5283160	159999
0.218969	0.0329445	EP	Herm	DLW118	2022_01_17_DLW118_herm_01002_Statistics	24.51	WT	SYP2GFP	3697060	150839
0.236756	0.0549675	EP	Herm	DLW118	2022_01_17_DLW118_herm_01002_Statistics	19.67	WT	SYP2GFP	3443350	175056
0.211243	0.0233779	EP	Herm	DLW118	2022_01_17_DLW118_herm_01002_Statistics	28.1	WT	SYP2GFP	4142920	147435
0.482317	0.359016	MP	Herm	DLW118	2022_01_17_DLW118_herm_01002_Statistics	27.24	WT	SYP2GFP	4059220	149017
0.460563	0.33208	EP	Herm	DLW118	2022_01_17_DLW118_herm_01002_Statistics	28.05	WT	SYP2GFP	4153670	148081
0.435541	0.301099	EP	Herm	DLW118	2022_01_17_DLW118_herm_01002_Statistics	44.27	WT	SYP2GFP	8418470	190162
0.464144	0.336514	MP	Herm	DLW118	2022_01_17_DLW118_herm_01002_Statistics	40.36	WT	SYP2GFP	6410340	158829
0.465945	0.338745	MP	Herm	DLW118	2022_01_17_DLW118_herm_01002_Statistics	23.43	WT	SYP2GFP	3250450	138730
0.420438	0.282399	EP	Herm	DLW118	2022_01_17_DLW118_herm_01002_Statistics	30.31	WT	SYP2GFP	5650990	186440
0.396568	0.252843	EP	Herm	DLW118	2022_01_17_DLW118_herm_01002_Statistics	30.85	WT	SYP2GFP	5438330	176283
0.44555	0.313492	EP	Herm	DLW118	2022_01_17_DLW118_herm_01002_Statistics	28.12	WT	SYP2GFP	4271060	151887
0.400946	0.258264	EP	Herm	DLW118	2022_01_17_DLW118_herm_01002_Statistics	34.33	WT	SYP2GFP	6879270	200387
0.423873	0.286652	EP	Herm	DLW118	2022_01_17_DLW118_herm_01002_Statistics	38.59	WT	SYP2GFP	6635370	171945
0.424847	0.287859	EP	Herm	DLW118	2022_01_17_DLW118_herm_01002_Statistics	23.32	WT	SYP2GFP	3596530	154225
0.37493	0.226052	EP	Herm	DLW118	2022_01_17_DLW118_herm_01002_Statistics	35.85	WT	SYP2GFP	7084590	197618
0.401423	0.258855	EP	Herm	DLW118	2022_01_17_DLW118_herm_01002_Statistics	25.34	WT	SYP2GFP	4301920	169768
0.380227	0.23261	EP	Herm	DLW118	2022_01_17_DLW118_herm_01002_Statistics	34.87	WT	SYP2GFP	6404540	183669
0.35826	0.205412	EP	Herm	DLW118	2022_01_17_DLW118_herm_01002_Statistics	40.02	WT	SYP2GFP	7196710	179828
0.382168	0.235014	EP	Herm	DLW118	2022_01_17_DLW118_herm_01002_Statistics	32.07	WT	SYP2GFP	5433020	169411
0.404307	0.262426	EP	Herm	DLW118	2022_01_17_DLW118_herm_01002_Statistics	30.11	WT	SYP2GFP	4861800	161468
0.362484	0.210642	EP	Herm	DLW118	2022_01_17_DLW118_herm_01002_Statistics	29.46	WT	SYP2GFP	5004420	169872
0.38279	0.235784	EP	Herm	DLW118	2022_01_17_DLW118_herm_01002_Statistics	35.83	WT	SYP2GFP	6274240	175111
0.361862	0.209872	EP	Herm	DLW118	2022_01_17_DLW118_herm_01002_Statistics	22.55	WT	SYP2GFP	3622490	160643
0.6345	0.547446	MP	Herm	DLW118	2022_01_17_DLW118_herm_01002_Statistics	42.82	WT	SYP2GFP	6841460	159773
0.602024	0.507235	MP	Herm	DLW118	2022_01_17_DLW118_herm_01002_Statistics	43.02	WT	SYP2GFP	6944490	161425
0.614045	0.522119	MP	Herm	DLW118	2022_01_17_DLW118_herm_01002_Statistics	32.63	WT	SYP2GFP	4913260	150575
0.5833	0.484051	MP	Herm	DLW118	2022_01_17_DLW118_herm_01002_Statistics	38.95	WT	SYP2GFP	6358660	163252
0.571438	0.469364	MP	Herm	DLW118	2022_01_17_DLW118_herm_01002_Statistics	39.31	WT	SYP2GFP	6018790	153111
0.614007	0.522072	MP	Herm	DLW118	2022_01_17_DLW118_herm_01002_Statistics	33.47	WT	SYP2GFP	4900890	146426
0.604729	0.510584	MP	Herm	DLW118	2022_01_17_DLW118_herm_01002_Statistics	32.76	WT	SYP2GFP	5105060	155832
0.538178	0.428182	MP	Herm	DLW118	2022_01_17_DLW118_herm_01002_Statistics	33.26	WT	SYP2GFP	4932780	148310
0.584384	0.485393	MP	Herm	DLW118	2022_01_17_DLW118_herm_01002_Statistics	31.77	WT	SYP2GFP	4871000	153321
0.574088	0.472646	MP	Herm	DLW118	2022_01_17_DLW118_herm_01002_Statistics	35.31	WT	SYP2GFP	5326080	150838
0.560816	0.456212	MP	Herm	DLW118	2022_01_17_DLW118_herm_01002_Statistics	31.67	WT	SYP2GFP	4631520	146243
0.5435	0.434772	MP	Herm	DLW118	2022_01_17_DLW118_herm_01002_Statistics	28.71	WT	SYP2GFP	4023840	140155
0.515959	0.400671	MP	Herm	DLW118	2022_01_17_DLW118_herm_01002_Statistics	24.3	WT	SYP2GFP	3299050	135763
0.506497	0.388955	MP	Herm	DLW118	2022_01_17_DLW118_herm_01002_Statistics	24.02	WT	SYP2GFP	3431510	142861
0.489419	0.36781	MP	Herm	DLW118	2022_01_17_DLW118_herm_01002_Statistics	22.31	WT	SYP2GFP	3214450	144081
0.491046	0.369824	MP	Herm	DLW118	2022_01_17_DLW118_herm_01002_Statistics	32.82	WT	SYP2GFP	4494680	136949
0.963845	0.955234	LP	Herm	DLW118	2022_01_17_DLW118_herm_01002_Statistics	48.77	WT	SYP2GFP	6940710	142315
0.991394	0.989344	LP	Herm	DLW118	2022_01_17_DLW118_herm_01002_Statistics	47.14	WT	SYP2GFP	6898460	146340
0.961659	0.952527	LP	Herm	DLW118	2022_01_17_DLW118_herm_01002_Statistics	45.01	WT	SYP2GFP	6449560	143292
0.927592	0.910346	LP	Herm	DLW118	2022_01_17_DLW118_herm_01002_Statistics	47.23	WT	SYP2GFP	6733690	142572
0.896536	0.871893	LP	Herm	DLW118	2022_01_17_DLW118_herm_01002_Statistics	41.83	WT	SYP2GFP	5727440	136922
0.912932	0.892195	LP	Herm	DLW118	2022_01_17_DLW118_herm_01002_Statistics	42.42	WT	SYP2GFP	5934850	139907
0.843334	0.80602	LP	Herm	DLW118	2022_01_17_DLW118_herm_01002_Statistics	49.32	WT	SYP2GFP	6904590	139996
0.870068	0.83912	LP	Herm	DLW118	2022_01_17_DLW118_herm_01002_Statistics	37.61	WT	SYP2GFP	5233170	139143
0.828947	0.788206	LP	Herm	DLW118	2022_01_17_DLW118_herm_01002_Statistics	32.4	WT	SYP2GFP	4521310	139547
0.839921	0.801793	LP	Herm	DLW118	2022_01_17_DLW118_herm_01002_Statistics	40.02	WT	SYP2GFP	5886680	147093
0.81235	0.767656	LP	Herm	DLW118	2022_01_17_DLW118_herm_01002_Statistics	45.3	WT	SYP2GFP	6555230	144707
0.806578	0.760509	LP	Herm	DLW118	2022_01_17_DLW118_herm_01002_Statistics	37.33	WT	SYP2GFP	5277410	141372
0.776353	0.723085	LP	Herm	DLW118	2022_01_17_DLW118_herm_01002_Statistics	38.64	WT	SYP2GFP	5577340	144341
0.759489	0.702204	LP	Herm	DLW118	2022_01_17_DLW118_herm_01002_Statistics	41.65	WT	SYP2GFP	6281220	150810
0.743449	0.682345	LP	Herm	DLW118	2022_01_17_DLW118_herm_01002_Statistics	40.78	WT	SYP2GFP	6187060	151718
0.728089	0.663326	MP	Herm	DLW118	2022_01_17_DLW118_herm_01002_Statistics	42.31	WT	SYP2GFP	6625950	156605
0.740885	0.679169	LP	Herm	DLW118	2022_01_17_DLW118_herm_01002_Statistics	40.32	WT	SYP2GFP	6065170	150426
0.687934	0.613606	MP	Herm	DLW118	2022_01_17_DLW118_herm_01002_Statistics	42.04	WT	SYP2GFP	6437710	153133
0.716707	0.649233	MP	Herm	DLW118	2022_01_17_DLW118_herm_01002_Statistics	35.84	WT	SYP2GFP	5581060	155722
0.689105	0.615057	MP	Herm	DLW118	2022_01_17_DLW118_herm_01002_Statistics	40.16	WT	SYP2GFP	6042990	150473
0.664076	0.584067	MP	Herm	DLW118	2022_01_17_DLW118_herm_01002_Statistics	40.33	WT	SYP2GFP	6061600	150300
0.695704	0.623227	MP	Herm	DLW118	2022_01_17_DLW118_herm_01002_Statistics	44.2	WT	SYP2GFP	7105190	160751
0.711704	0.643038	MP	Herm	DLW118	2022_01_17_DLW118_herm_01002_Statistics	37.96	WT	SYP2GFP	5603420	147614
0.664616	0.584734	MP	Herm	DLW118	2022_01_17_DLW118_herm_01002_Statistics	36.23	WT	SYP2GFP	5678550	156736
0.66772	0.588578	MP	Herm	DLW118	2022_01_17_DLW118_herm_01002_Statistics	38.6	WT	SYP2GFP	5726810	148363
0.637187	0.550772	MP	Herm	DLW118	2022_01_17_DLW118_herm_01002_Statistics	40.68	WT	SYP2GFP	6064020	149066
1	1	LP	Herm	DLW118	2022_01_17_DLW118_herm_01002_Statistics	48.02	WT	SYP2GFP	7387840	153849
0.0353285	-0.099501	TZ	Herm	DLW118	2022_01_17_DLW118_herm_01003_Statistics	18.13	WT	SYP2GFP	2363870	130384
0.0281042	-0.107735	TZ	Herm	DLW118	2022_01_17_DLW118_herm_01003_Statistics	20.85	WT	SYP2GFP	2733490	131103
0.0596801	-0.0717458	TZ	Herm	DLW118	2022_01_17_DLW118_herm_01003_Statistics	16.33	WT	SYP2GFP	2120400	129847
0.0412022	-0.0928064	TZ	Herm	DLW118	2022_01_17_DLW118_herm_01003_Statistics	19.65	WT	SYP2GFP	2703690	137592
0.0661378	-0.0643855	TZ	Herm	DLW118	2022_01_17_DLW118_herm_01003_Statistics	19.16	WT	SYP2GFP	2849390	148716
0.0896473	-0.0375902	TZ	Herm	DLW118	2022_01_17_DLW118_herm_01003_Statistics	17.05	WT	SYP2GFP	2353630	138043
0.0922449	-0.0346296	TZ	Herm	DLW118	2022_01_17_DLW118_herm_01003_Statistics	14.27	WT	SYP2GFP	1901630	133261
0.110124	-0.0142515	TZ	Herm	DLW118	2022_01_17_DLW118_herm_01003_Statistics	14.62	WT	SYP2GFP	2126010	145418
0.116335	-0.00717265	TZ	Herm	DLW118	2022_01_17_DLW118_herm_01003_Statistics	16.11	WT	SYP2GFP	2320300	144029
0.098149	-0.0279003	TZ	Herm	DLW118	2022_01_17_DLW118_herm_01003_Statistics	20.49	WT	SYP2GFP	2985500	145705
0.124249	0.00184774	EP	Herm	DLW118	2022_01_17_DLW118_herm_01003_Statistics	22.9	WT	SYP2GFP	3430350	149797
0.134821	0.0138971	EP	Herm	DLW118	2022_01_17_DLW118_herm_01003_Statistics	17.03	WT	SYP2GFP	2493250	146403
0.144511	0.0249415	EP	Herm	DLW118	2022_01_17_DLW118_herm_01003_Statistics	20.71	WT	SYP2GFP	2955700	142718
0.128092	0.00622804	EP	Herm	DLW118	2022_01_17_DLW118_herm_01003_Statistics	21.91	WT	SYP2GFP	3281290	149762
0.160224	0.0428513	EP	Herm	DLW118	2022_01_17_DLW118_herm_01003_Statistics	19.23	WT	SYP2GFP	2755770	143306
0.167791	0.0514756	EP	Herm	DLW118	2022_01_17_DLW118_herm_01003_Statistics	19.66	WT	SYP2GFP	3006390	152919
0.178858	0.0640895	EP	Herm	DLW118	2022_01_17_DLW118_herm_01003_Statistics	19.66	WT	SYP2GFP	2983440	151752
0.193362	0.0806199	EP	Herm	DLW118	2022_01_17_DLW118_herm_01003_Statistics	21	WT	SYP2GFP	3213310	153015
0.180753	0.0662486	EP	Herm	DLW118	2022_01_17_DLW118_herm_01003_Statistics	22.81	WT	SYP2GFP	3414890	149710
0.201613	0.0900246	EP	Herm	DLW118	2022_01_17_DLW118_herm_01003_Statistics	23.5	WT	SYP2GFP	3411440	145168
0.216168	0.106613	EP	Herm	DLW118	2022_01_17_DLW118_herm_01003_Statistics	17.82	WT	SYP2GFP	2638260	148051
0.209028	0.0984765	EP	Herm	DLW118	2022_01_17_DLW118_herm_01003_Statistics	15.63	WT	SYP2GFP	2465690	157754
0.223016	0.114419	EP	Herm	DLW118	2022_01_17_DLW118_herm_01003_Statistics	19.84	WT	SYP2GFP	2939820	148176
0.228272	0.120409	EP	Herm	DLW118	2022_01_17_DLW118_herm_01003_Statistics	20.21	WT	SYP2GFP	3034790	150163
0.235026	0.128108	EP	Herm	DLW118	2022_01_17_DLW118_herm_01003_Statistics	9.46	WT	SYP2GFP	1461060	154446
0.262469	0.159386	EP	Herm	DLW118	2022_01_17_DLW118_herm_01003_Statistics	28.42	WT	SYP2GFP	5112300	179884
0.256367	0.152432	EP	Herm	DLW118	2022_01_17_DLW118_herm_01003_Statistics	30.53	WT	SYP2GFP	4936340	161688
0.288491	0.189045	EP	Herm	DLW118	2022_01_17_DLW118_herm_01003_Statistics	31.49	WT	SYP2GFP	4937970	156811
0.255489	0.151431	EP	Herm	DLW118	2022_01_17_DLW118_herm_01003_Statistics	18.68	WT	SYP2GFP	3060710	163850
0.310162	0.213745	EP	Herm	DLW118	2022_01_17_DLW118_herm_01003_Statistics	26.85	WT	SYP2GFP	4296330	160012
0.284586	0.184594	EP	Herm	DLW118	2022_01_17_DLW118_herm_01003_Statistics	27.98	WT	SYP2GFP	4170450	149051
0.309816	0.213351	EP	Herm	DLW118	2022_01_17_DLW118_herm_01003_Statistics	29.3	WT	SYP2GFP	4778710	163096
0.278338	0.177473	EP	Herm	DLW118	2022_01_17_DLW118_herm_01003_Statistics	28.79	WT	SYP2GFP	4440290	154230
0.334702	0.241715	EP	Herm	DLW118	2022_01_17_DLW118_herm_01003_Statistics	26.49	WT	SYP2GFP	4371180	165012
0.283886	0.183797	EP	Herm	DLW118	2022_01_17_DLW118_herm_01003_Statistics	20.67	WT	SYP2GFP	3697690	178892
0.306503	0.209574	EP	Herm	DLW118	2022_01_17_DLW118_herm_01003_Statistics	34.18	WT	SYP2GFP	5521480	161541
0.302858	0.20542	EP	Herm	DLW118	2022_01_17_DLW118_herm_01003_Statistics	20.3	WT	SYP2GFP	3302220	162671
0.360854	0.271523	EP	Herm	DLW118	2022_01_17_DLW118_herm_01003_Statistics	30.02	WT	SYP2GFP	5125170	170725
0.331034	0.237535	EP	Herm	DLW118	2022_01_17_DLW118_herm_01003_Statistics	35.53	WT	SYP2GFP	5816380	163703
0.312369	0.21626	EP	Herm	DLW118	2022_01_17_DLW118_herm_01003_Statistics	28.11	WT	SYP2GFP	5324060	189401
0.357763	0.268	EP	Herm	DLW118	2022_01_17_DLW118_herm_01003_Statistics	21.11	WT	SYP2GFP	3765020	178352
0.332466	0.239166	EP	Herm	DLW118	2022_01_17_DLW118_herm_01003_Statistics	31.18	WT	SYP2GFP	5323040	170720
0.376063	0.288857	EP	Herm	DLW118	2022_01_17_DLW118_herm_01003_Statistics	28.75	WT	SYP2GFP	5078730	176651
0.361037	0.271731	EP	Herm	DLW118	2022_01_17_DLW118_herm_01003_Statistics	31.96	WT	SYP2GFP	5435010	170057
0.390738	0.305584	EP	Herm	DLW118	2022_01_17_DLW118_herm_01003_Statistics	20.48	WT	SYP2GFP	3606240	176086
0.383685	0.297545	EP	Herm	DLW118	2022_01_17_DLW118_herm_01003_Statistics	30.98	WT	SYP2GFP	5893960	190250
0.406023	0.323005	EP	Herm	DLW118	2022_01_17_DLW118_herm_01003_Statistics	24.7	WT	SYP2GFP	4276730	173147
0.431728	0.352302	MP	Herm	DLW118	2022_01_17_DLW118_herm_01003_Statistics	26.3	WT	SYP2GFP	4281710	162803
0.417072	0.335597	MP	Herm	DLW118	2022_01_17_DLW118_herm_01003_Statistics	29.72	WT	SYP2GFP	5935420	199711
0.407829	0.325063	EP	Herm	DLW118	2022_01_17_DLW118_herm_01003_Statistics	19.58	WT	SYP2GFP	3662050	187030
0.45815	0.382417	MP	Herm	DLW118	2022_01_17_DLW118_herm_01003_Statistics	26.28	WT	SYP2GFP	3983660	151585
0.445038	0.367473	MP	Herm	DLW118	2022_01_17_DLW118_herm_01003_Statistics	28.78	WT	SYP2GFP	5520950	191833
0.432857	0.353589	MP	Herm	DLW118	2022_01_17_DLW118_herm_01003_Statistics	33.46	WT	SYP2GFP	5661530	169203
0.520021	0.452935	MP	Herm	DLW118	2022_01_17_DLW118_herm_01003_Statistics	43	WT	SYP2GFP	7809930	181626
0.416053	0.334436	MP	Herm	DLW118	2022_01_17_DLW118_herm_01003_Statistics	25.65	WT	SYP2GFP	4774840	186154
0.483901	0.411767	MP	Herm	DLW118	2022_01_17_DLW118_herm_01003_Statistics	20.14	WT	SYP2GFP	2898650	143925
0.508922	0.440286	MP	Herm	DLW118	2022_01_17_DLW118_herm_01003_Statistics	21.54	WT	SYP2GFP	3192350	148206
0.464531	0.38969	MP	Herm	DLW118	2022_01_17_DLW118_herm_01003_Statistics	32.7	WT	SYP2GFP	4993230	152698
0.435385	0.356471	MP	Herm	DLW118	2022_01_17_DLW118_herm_01003_Statistics	33.8	WT	SYP2GFP	5801480	171641
0.45269	0.376194	MP	Herm	DLW118	2022_01_17_DLW118_herm_01003_Statistics	26.55	WT	SYP2GFP	4011880	151107
0.498262	0.428135	MP	Herm	DLW118	2022_01_17_DLW118_herm_01003_Statistics	22.21	WT	SYP2GFP	3307110	148902
0.526484	0.460302	MP	Herm	DLW118	2022_01_17_DLW118_herm_01003_Statistics	51.14	WT	SYP2GFP	9593480	187592
0.517807	0.450412	MP	Herm	DLW118	2022_01_17_DLW118_herm_01003_Statistics	23.95	WT	SYP2GFP	3507120	146435
0.534423	0.46935	MP	Herm	DLW118	2022_01_17_DLW118_herm_01003_Statistics	55.78	WT	SYP2GFP	9595410	172022
0.544323	0.480634	MP	Herm	DLW118	2022_01_17_DLW118_herm_01003_Statistics	25.27	WT	SYP2GFP	3793400	150115
0.557002	0.495086	MP	Herm	DLW118	2022_01_17_DLW118_herm_01003_Statistics	22.08	WT	SYP2GFP	3363710	152342
0.59483	0.5382	MP	Herm	DLW118	2022_01_17_DLW118_herm_01003_Statistics	29.52	WT	SYP2GFP	4348100	147293
0.537979	0.473403	MP	Herm	DLW118	2022_01_17_DLW118_herm_01003_Statistics	29.21	WT	SYP2GFP	4427500	151575
0.580888	0.52231	MP	Herm	DLW118	2022_01_17_DLW118_herm_01003_Statistics	26.9	WT	SYP2GFP	3904880	145163
0.639533	0.589151	MP	Herm	DLW118	2022_01_17_DLW118_herm_01003_Statistics	33.93	WT	SYP2GFP	4922290	145072
0.559143	0.497526	MP	Herm	DLW118	2022_01_17_DLW118_herm_01003_Statistics	31.03	WT	SYP2GFP	4630340	149221
0.587133	0.529428	MP	Herm	DLW118	2022_01_17_DLW118_herm_01003_Statistics	30.51	WT	SYP2GFP	4524090	148282
0.543105	0.479246	MP	Herm	DLW118	2022_01_17_DLW118_herm_01003_Statistics	30.86	WT	SYP2GFP	4761440	154292
0.667133	0.620609	MP	Herm	DLW118	2022_01_17_DLW118_herm_01003_Statistics	34.46	WT	SYP2GFP	5157410	149664
0.640401	0.590141	MP	Herm	DLW118	2022_01_17_DLW118_herm_01003_Statistics	40	WT	SYP2GFP	6344200	158605
0.572522	0.512775	MP	Herm	DLW118	2022_01_17_DLW118_herm_01003_Statistics	31.67	WT	SYP2GFP	4604250	145382
0.717876	0.678445	LP	Herm	DLW118	2022_01_17_DLW118_herm_01003_Statistics	30.18	WT	SYP2GFP	4589700	152078
0.602723	0.547197	MP	Herm	DLW118	2022_01_17_DLW118_herm_01003_Statistics	34.45	WT	SYP2GFP	5145040	149348
0.634236	0.583114	MP	Herm	DLW118	2022_01_17_DLW118_herm_01003_Statistics	41.77	WT	SYP2GFP	7035020	168423
0.696784	0.654404	MP	Herm	DLW118	2022_01_17_DLW118_herm_01003_Statistics	34.29	WT	SYP2GFP	5043830	147093
0.557854	0.496056	MP	Herm	DLW118	2022_01_17_DLW118_herm_01003_Statistics	34.16	WT	SYP2GFP	5190600	151950
0.667002	0.620459	MP	Herm	DLW118	2022_01_17_DLW118_herm_01003_Statistics	38.64	WT	SYP2GFP	5800300	150111
0.586384	0.528574	MP	Herm	DLW118	2022_01_17_DLW118_herm_01003_Statistics	35.94	WT	SYP2GFP	5310560	147762
0.746747	0.711351	LP	Herm	DLW118	2022_01_17_DLW118_herm_01003_Statistics	42.18	WT	SYP2GFP	6509730	154332
0.623533	0.570915	MP	Herm	DLW118	2022_01_17_DLW118_herm_01003_Statistics	37.62	WT	SYP2GFP	5844290	155351
0.72153	0.682609	LP	Herm	DLW118	2022_01_17_DLW118_herm_01003_Statistics	39.05	WT	SYP2GFP	5980640	153153
0.689922	0.646583	MP	Herm	DLW118	2022_01_17_DLW118_herm_01003_Statistics	33.23	WT	SYP2GFP	4938780	148624
0.653527	0.605101	MP	Herm	DLW118	2022_01_17_DLW118_herm_01003_Statistics	21.26	WT	SYP2GFP	3288600	154685
0.643171	0.593298	MP	Herm	DLW118	2022_01_17_DLW118_herm_01003_Statistics	17.7	WT	SYP2GFP	2689230	151934
0.684697	0.640628	MP	Herm	DLW118	2022_01_17_DLW118_herm_01003_Statistics	36.93	WT	SYP2GFP	5747810	155641
0.721943	0.68308	LP	Herm	DLW118	2022_01_17_DLW118_herm_01003_Statistics	41.03	WT	SYP2GFP	6209510	151341
0.753882	0.719483	LP	Herm	DLW118	2022_01_17_DLW118_herm_01003_Statistics	40.76	WT	SYP2GFP	6248710	153305
0.710781	0.670358	LP	Herm	DLW118	2022_01_17_DLW118_herm_01003_Statistics	23.45	WT	SYP2GFP	3421370	145901
0.709957	0.669419	LP	Herm	DLW118	2022_01_17_DLW118_herm_01003_Statistics	13.36	WT	SYP2GFP	1942010	145360
0.700075	0.658155	MP	Herm	DLW118	2022_01_17_DLW118_herm_01003_Statistics	41.51	WT	SYP2GFP	6838080	164733
0.750198	0.715284	LP	Herm	DLW118	2022_01_17_DLW118_herm_01003_Statistics	37.16	WT	SYP2GFP	5627890	151450
0.741332	0.705179	LP	Herm	DLW118	2022_01_17_DLW118_herm_01003_Statistics	42.1	WT	SYP2GFP	6806200	161667
0.818557	0.793198	LP	Herm	DLW118	2022_01_17_DLW118_herm_01003_Statistics	70.45	WT	SYP2GFP	10647700	151138
0.787079	0.757319	LP	Herm	DLW118	2022_01_17_DLW118_herm_01003_Statistics	38.07	WT	SYP2GFP	5827550	153075
0.845019	0.823358	LP	Herm	DLW118	2022_01_17_DLW118_herm_01003_Statistics	40.1	WT	SYP2GFP	6045990	150773
0.815558	0.789779	LP	Herm	DLW118	2022_01_17_DLW118_herm_01003_Statistics	45.52	WT	SYP2GFP	6695670	147093
0.781482	0.75094	LP	Herm	DLW118	2022_01_17_DLW118_herm_01003_Statistics	38.81	WT	SYP2GFP	5815640	149849
0.951811	0.945076	LP	Herm	DLW118	2022_01_17_DLW118_herm_01003_Statistics	37.51	WT	SYP2GFP	5667080	151082
0.859015	0.83931	LP	Herm	DLW118	2022_01_17_DLW118_herm_01003_Statistics	16.89	WT	SYP2GFP	2467250	146078
0.983155	0.9808	LP	Herm	DLW118	2022_01_17_DLW118_herm_01003_Statistics	37.8	WT	SYP2GFP	5452820	144254
0.778354	0.747375	LP	Herm	DLW118	2022_01_17_DLW118_herm_01003_Statistics	46.32	WT	SYP2GFP	7042530	152041
0.889286	0.873812	LP	Herm	DLW118	2022_01_17_DLW118_herm_01003_Statistics	45.68	WT	SYP2GFP	6605100	144595
0.848327	0.827129	LP	Herm	DLW118	2022_01_17_DLW118_herm_01003_Statistics	27.01	WT	SYP2GFP	3959640	146599
0.812477	0.786267	LP	Herm	DLW118	2022_01_17_DLW118_herm_01003_Statistics	47.24	WT	SYP2GFP	7276800	154039
0.962685	0.95747	LP	Herm	DLW118	2022_01_17_DLW118_herm_01003_Statistics	42.38	WT	SYP2GFP	6240390	147248
0.773338	0.741659	LP	Herm	DLW118	2022_01_17_DLW118_herm_01003_Statistics	39.39	WT	SYP2GFP	6293640	159778
0.928771	0.918815	LP	Herm	DLW118	2022_01_17_DLW118_herm_01003_Statistics	42	WT	SYP2GFP	6145980	146333
0.809298	0.782644	LP	Herm	DLW118	2022_01_17_DLW118_herm_01003_Statistics	48.44	WT	SYP2GFP	8052630	166239
0.848098	0.826867	LP	Herm	DLW118	2022_01_17_DLW118_herm_01003_Statistics	46.5	WT	SYP2GFP	6903470	148462
0.985971	0.98401	LP	Herm	DLW118	2022_01_17_DLW118_herm_01003_Statistics	43.1	WT	SYP2GFP	6572220	152488
0.953042	0.946479	LP	Herm	DLW118	2022_01_17_DLW118_herm_01003_Statistics	47.57	WT	SYP2GFP	7127360	149829
0.921435	0.910455	LP	Herm	DLW118	2022_01_17_DLW118_herm_01003_Statistics	48.11	WT	SYP2GFP	7539200	156708
0.98676	0.98491	LP	Herm	DLW118	2022_01_17_DLW118_herm_01003_Statistics	40.88	WT	SYP2GFP	6241050	152668
1	1	LP	Herm	DLW118	2022_01_17_DLW118_herm_01003_Statistics	39.97	WT	SYP2GFP	6129790	153360
1	1	LP	Herm	DLW118	2022_01_17_DLW118_herm_01003_Statistics	42.96	WT	SYP2GFP	6445830	150043
0.117238	-0.0140514	TZ	Herm	DLW118	2022_01_17_DLW118_herm_01006_Statistics	13	WT	SYP2GFP	1590020	122309
0.091945	-0.0431061	TZ	Herm	DLW118	2022_01_17_DLW118_herm_01006_Statistics	12.8	WT	SYP2GFP	1519150	118684
0.0633914	-0.0759064	TZ	Herm	DLW118	2022_01_17_DLW118_herm_01006_Statistics	8.16	WT	SYP2GFP	918482	112559
0.0706307	-0.0675904	TZ	Herm	DLW118	2022_01_17_DLW118_herm_01006_Statistics	20.69	WT	SYP2GFP	2351670	113662
0.106992	-0.0258218	TZ	Herm	DLW118	2022_01_17_DLW118_herm_01006_Statistics	11.9	WT	SYP2GFP	1403820	117968
0.0874207	-0.0483033	TZ	Herm	DLW118	2022_01_17_DLW118_herm_01006_Statistics	16.46	WT	SYP2GFP	1955460	118801
0.0711157	-0.0670333	TZ	Herm	DLW118	2022_01_17_DLW118_herm_01006_Statistics	17.85	WT	SYP2GFP	1995460	111790
0.0465176	-0.0952898	TZ	Herm	DLW118	2022_01_17_DLW118_herm_01006_Statistics	20.64	WT	SYP2GFP	2467640	119556
0.0213168	-0.124239	TZ	Herm	DLW118	2022_01_17_DLW118_herm_01006_Statistics	16.28	WT	SYP2GFP	1825880	112155
0.0123107	-0.134584	TZ	Herm	DLW118	2022_01_17_DLW118_herm_01006_Statistics	18.08	WT	SYP2GFP	2091150	115661
0.0425285	-0.0998722	TZ	Herm	DLW118	2022_01_17_DLW118_herm_01006_Statistics	20.63	WT	SYP2GFP	2266430	109861
0.016754	-0.12948	TZ	Herm	DLW118	2022_01_17_DLW118_herm_01006_Statistics	18.63	WT	SYP2GFP	2129550	114308
0.303278	0.199657	EP	Herm	DLW118	2022_01_17_DLW118_herm_01006_Statistics	35.53	WT	SYP2GFP	5357420	150786
0.279708	0.172582	EP	Herm	DLW118	2022_01_17_DLW118_herm_01006_Statistics	29.98	WT	SYP2GFP	4255520	141945
0.287751	0.181821	EP	Herm	DLW118	2022_01_17_DLW118_herm_01006_Statistics	31.11	WT	SYP2GFP	4547900	146188
0.299881	0.195755	EP	Herm	DLW118	2022_01_17_DLW118_herm_01006_Statistics	40.88	WT	SYP2GFP	6011870	147061
0.26153	0.151701	EP	Herm	DLW118	2022_01_17_DLW118_herm_01006_Statistics	35.49	WT	SYP2GFP	5065860	142740
0.313446	0.211338	EP	Herm	DLW118	2022_01_17_DLW118_herm_01006_Statistics	25.09	WT	SYP2GFP	3497300	139390
0.269844	0.161251	EP	Herm	DLW118	2022_01_17_DLW118_herm_01006_Statistics	37.9	WT	SYP2GFP	5490700	144873
0.243805	0.13134	EP	Herm	DLW118	2022_01_17_DLW118_herm_01006_Statistics	19.57	WT	SYP2GFP	2853650	145818
0.29712	0.192584	EP	Herm	DLW118	2022_01_17_DLW118_herm_01006_Statistics	36.79	WT	SYP2GFP	5188480	141030
0.256693	0.146144	EP	Herm	DLW118	2022_01_17_DLW118_herm_01006_Statistics	30.57	WT	SYP2GFP	4817150	157578
0.271544	0.163204	EP	Herm	DLW118	2022_01_17_DLW118_herm_01006_Statistics	28.06	WT	SYP2GFP	3640300	129733
0.219167	0.103037	EP	Herm	DLW118	2022_01_17_DLW118_herm_01006_Statistics	24.15	WT	SYP2GFP	3433480	142173
0.199046	0.0799231	EP	Herm	DLW118	2022_01_17_DLW118_herm_01006_Statistics	25.75	WT	SYP2GFP	3810280	147972
0.230003	0.115485	EP	Herm	DLW118	2022_01_17_DLW118_herm_01006_Statistics	29.18	WT	SYP2GFP	4037390	138362
0.21617	0.0995945	EP	Herm	DLW118	2022_01_17_DLW118_herm_01006_Statistics	25.86	WT	SYP2GFP	3548740	137229
0.17109	0.0478102	EP	Herm	DLW118	2022_01_17_DLW118_herm_01006_Statistics	33.04	WT	SYP2GFP	4569800	138311
0.194359	0.0745392	EP	Herm	DLW118	2022_01_17_DLW118_herm_01006_Statistics	23.55	WT	SYP2GFP	3081100	130832
0.224138	0.108747	EP	Herm	DLW118	2022_01_17_DLW118_herm_01006_Statistics	27.5	WT	SYP2GFP	3717420	135179
0.203391	0.0849153	EP	Herm	DLW118	2022_01_17_DLW118_herm_01006_Statistics	23.92	WT	SYP2GFP	2967400	124055
0.202034	0.0833554	EP	Herm	DLW118	2022_01_17_DLW118_herm_01006_Statistics	26.53	WT	SYP2GFP	3937770	148427
0.170875	0.0475622	EP	Herm	DLW118	2022_01_17_DLW118_herm_01006_Statistics	33.24	WT	SYP2GFP	4582680	137866
0.174375	0.0515828	EP	Herm	DLW118	2022_01_17_DLW118_herm_01006_Statistics	29.45	WT	SYP2GFP	3777360	128263
0.180475	0.0585903	EP	Herm	DLW118	2022_01_17_DLW118_herm_01006_Statistics	27.94	WT	SYP2GFP	3646740	130520
0.150532	0.0241944	EP	Herm	DLW118	2022_01_17_DLW118_herm_01006_Statistics	25.21	WT	SYP2GFP	3362930	133397
0.155573	0.0299849	EP	Herm	DLW118	2022_01_17_DLW118_herm_01006_Statistics	25.03	WT	SYP2GFP	3155550	126071
0.130843	0.00157658	EP	Herm	DLW118	2022_01_17_DLW118_herm_01006_Statistics	27.99	WT	SYP2GFP	3567840	127468
0.461843	0.381805	MP	Herm	DLW118	2022_01_17_DLW118_herm_01006_Statistics	20.64	WT	SYP2GFP	2945750	142720
0.478062	0.400436	MP	Herm	DLW118	2022_01_17_DLW118_herm_01006_Statistics	28.98	WT	SYP2GFP	4050010	139752
0.45336	0.37206	MP	Herm	DLW118	2022_01_17_DLW118_herm_01006_Statistics	21.24	WT	SYP2GFP	2909060	136961
0.438463	0.354948	MP	Herm	DLW118	2022_01_17_DLW118_herm_01006_Statistics	36.49	WT	SYP2GFP	6240780	171027
0.429869	0.345076	MP	Herm	DLW118	2022_01_17_DLW118_herm_01006_Statistics	19.17	WT	SYP2GFP	2614540	136387
0.421972	0.336005	MP	Herm	DLW118	2022_01_17_DLW118_herm_01006_Statistics	40.39	WT	SYP2GFP	6815370	168739
0.416733	0.329986	EP	Herm	DLW118	2022_01_17_DLW118_herm_01006_Statistics	36	WT	SYP2GFP	6616400	183789
0.438724	0.355247	MP	Herm	DLW118	2022_01_17_DLW118_herm_01006_Statistics	26.18	WT	SYP2GFP	3461750	132229
0.390253	0.299568	EP	Herm	DLW118	2022_01_17_DLW118_herm_01006_Statistics	46.02	WT	SYP2GFP	7252440	157593
0.39852	0.309065	EP	Herm	DLW118	2022_01_17_DLW118_herm_01006_Statistics	25.67	WT	SYP2GFP	3637060	141685
0.36659	0.272385	EP	Herm	DLW118	2022_01_17_DLW118_herm_01006_Statistics	32.45	WT	SYP2GFP	4999490	154067
0.372909	0.279645	EP	Herm	DLW118	2022_01_17_DLW118_herm_01006_Statistics	30.98	WT	SYP2GFP	4600820	148509
0.389551	0.298762	EP	Herm	DLW118	2022_01_17_DLW118_herm_01006_Statistics	38.32	WT	SYP2GFP	5502400	143591
0.379108	0.286765	EP	Herm	DLW118	2022_01_17_DLW118_herm_01006_Statistics	30.21	WT	SYP2GFP	4359380	144303
0.345627	0.248305	EP	Herm	DLW118	2022_01_17_DLW118_herm_01006_Statistics	38.07	WT	SYP2GFP	6024920	158259
0.348603	0.251723	EP	Herm	DLW118	2022_01_17_DLW118_herm_01006_Statistics	32.6	WT	SYP2GFP	4961230	152185
0.355721	0.2599	EP	Herm	DLW118	2022_01_17_DLW118_herm_01006_Statistics	30.93	WT	SYP2GFP	4571220	147792
0.364804	0.270334	EP	Herm	DLW118	2022_01_17_DLW118_herm_01006_Statistics	32.37	WT	SYP2GFP	4659860	143956
0.326759	0.226631	EP	Herm	DLW118	2022_01_17_DLW118_herm_01006_Statistics	31.61	WT	SYP2GFP	5036600	159336
0.338547	0.240172	EP	Herm	DLW118	2022_01_17_DLW118_herm_01006_Statistics	22.94	WT	SYP2GFP	3521250	153498
0.331236	0.231773	EP	Herm	DLW118	2022_01_17_DLW118_herm_01006_Statistics	32.85	WT	SYP2GFP	4854880	147789
0.344317	0.246801	EP	Herm	DLW118	2022_01_17_DLW118_herm_01006_Statistics	25.66	WT	SYP2GFP	3672150	143108
0.68067	0.633177	MP	Herm	DLW118	2022_01_17_DLW118_herm_01006_Statistics	37.43	WT	SYP2GFP	5325570	142281
0.675087	0.626764	MP	Herm	DLW118	2022_01_17_DLW118_herm_01006_Statistics	34.22	WT	SYP2GFP	4846370	141624
0.645456	0.592726	MP	Herm	DLW118	2022_01_17_DLW118_herm_01006_Statistics	40.75	WT	SYP2GFP	5761710	141392
0.649802	0.597719	MP	Herm	DLW118	2022_01_17_DLW118_herm_01006_Statistics	36.57	WT	SYP2GFP	5159390	141083
0.63914	0.585471	MP	Herm	DLW118	2022_01_17_DLW118_herm_01006_Statistics	37.64	WT	SYP2GFP	5121470	136065
0.613572	0.5561	MP	Herm	DLW118	2022_01_17_DLW118_herm_01006_Statistics	39.02	WT	SYP2GFP	5373360	137708
0.619358	0.562747	MP	Herm	DLW118	2022_01_17_DLW118_herm_01006_Statistics	36.31	WT	SYP2GFP	4938290	136004
0.585015	0.523296	MP	Herm	DLW118	2022_01_17_DLW118_herm_01006_Statistics	31.38	WT	SYP2GFP	4507280	143635
0.592729	0.532157	MP	Herm	DLW118	2022_01_17_DLW118_herm_01006_Statistics	28.76	WT	SYP2GFP	4137440	143861
0.571131	0.507348	MP	Herm	DLW118	2022_01_17_DLW118_herm_01006_Statistics	33.59	WT	SYP2GFP	5067600	150866
0.561228	0.495972	MP	Herm	DLW118	2022_01_17_DLW118_herm_01006_Statistics	22.5	WT	SYP2GFP	3142750	139678
0.569175	0.5051	MP	Herm	DLW118	2022_01_17_DLW118_herm_01006_Statistics	26.24	WT	SYP2GFP	3669510	139844
0.543255	0.475326	MP	Herm	DLW118	2022_01_17_DLW118_herm_01006_Statistics	38.5	WT	SYP2GFP	5550890	144179
0.519158	0.447644	MP	Herm	DLW118	2022_01_17_DLW118_herm_01006_Statistics	28.17	WT	SYP2GFP	3788310	134480
0.543033	0.47507	MP	Herm	DLW118	2022_01_17_DLW118_herm_01006_Statistics	20.16	WT	SYP2GFP	2701500	134003
0.531271	0.461559	MP	Herm	DLW118	2022_01_17_DLW118_herm_01006_Statistics	24.44	WT	SYP2GFP	3198930	130889
0.503804	0.430007	MP	Herm	DLW118	2022_01_17_DLW118_herm_01006_Statistics	25.94	WT	SYP2GFP	3535090	136279
0.515411	0.44334	MP	Herm	DLW118	2022_01_17_DLW118_herm_01006_Statistics	24.31	WT	SYP2GFP	3221650	132524
0.491798	0.416215	MP	Herm	DLW118	2022_01_17_DLW118_herm_01006_Statistics	24.82	WT	SYP2GFP	3242710	130649
0.99571	0.995072	LP	Herm	DLW118	2022_01_17_DLW118_herm_01006_Statistics	43.13	WT	SYP2GFP	5966970	138348
0.965819	0.960736	LP	Herm	DLW118	2022_01_17_DLW118_herm_01006_Statistics	51.11	WT	SYP2GFP	6679410	130687
0.995435	0.994756	LP	Herm	DLW118	2022_01_17_DLW118_herm_01006_Statistics	32.77	WT	SYP2GFP	4370480	133368
0.938644	0.929519	LP	Herm	DLW118	2022_01_17_DLW118_herm_01006_Statistics	46.59	WT	SYP2GFP	5996770	128714
0.968157	0.963421	LP	Herm	DLW118	2022_01_17_DLW118_herm_01006_Statistics	40.25	WT	SYP2GFP	5058630	125680
0.91742	0.905139	LP	Herm	DLW118	2022_01_17_DLW118_herm_01006_Statistics	44.35	WT	SYP2GFP	6003200	135360
0.898196	0.883055	LP	Herm	DLW118	2022_01_17_DLW118_herm_01006_Statistics	41.25	WT	SYP2GFP	5435860	131778
0.883756	0.866468	LP	Herm	DLW118	2022_01_17_DLW118_herm_01006_Statistics	41.67	WT	SYP2GFP	5490650	131765
0.841123	0.817494	LP	Herm	DLW118	2022_01_17_DLW118_herm_01006_Statistics	45.72	WT	SYP2GFP	6100030	133421
0.862138	0.841634	LP	Herm	DLW118	2022_01_17_DLW118_herm_01006_Statistics	40.2	WT	SYP2GFP	5296220	131747
0.790332	0.759149	LP	Herm	DLW118	2022_01_17_DLW118_herm_01006_Statistics	47.99	WT	SYP2GFP	6693510	139477
0.806862	0.778137	LP	Herm	DLW118	2022_01_17_DLW118_herm_01006_Statistics	35.01	WT	SYP2GFP	4804890	137243
0.770399	0.736251	LP	Herm	DLW118	2022_01_17_DLW118_herm_01006_Statistics	46.09	WT	SYP2GFP	6641470	144098
0.792139	0.761224	LP	Herm	DLW118	2022_01_17_DLW118_herm_01006_Statistics	40.12	WT	SYP2GFP	5547690	138277
0.751193	0.714188	LP	Herm	DLW118	2022_01_17_DLW118_herm_01006_Statistics	52.49	WT	SYP2GFP	7505430	142988
0.717471	0.675452	LP	Herm	DLW118	2022_01_17_DLW118_herm_01006_Statistics	48.51	WT	SYP2GFP	7482580	154248
0.738523	0.699635	LP	Herm	DLW118	2022_01_17_DLW118_herm_01006_Statistics	39.26	WT	SYP2GFP	5664720	144287
0.75766	0.721618	LP	Herm	DLW118	2022_01_17_DLW118_herm_01006_Statistics	37.54	WT	SYP2GFP	5221690	139097
0.727036	0.686439	LP	Herm	DLW118	2022_01_17_DLW118_herm_01006_Statistics	37.07	WT	SYP2GFP	5178400	139692
0.702658	0.658435	MP	Herm	DLW118	2022_01_17_DLW118_herm_01006_Statistics	43.66	WT	SYP2GFP	6296560	144218
0.699474	0.654778	MP	Herm	DLW118	2022_01_17_DLW118_herm_01006_Statistics	37.15	WT	SYP2GFP	5142510	138426
0.117171	-0.138696	TZ	Male	DLW118	2022_01_17_DLW118_male_01_Statistics	7.97	WT	SYP2GFP	862650	108237
0.0832966	-0.182388	TZ	Male	DLW118	2022_01_17_DLW118_male_01_Statistics	5.99	WT	SYP2GFP	618799	103305
0.0474242	-0.228657	TZ	Male	DLW118	2022_01_17_DLW118_male_01_Statistics	6.77	WT	SYP2GFP	752284	111120
0.158422	-0.0854887	TZ	Male	DLW118	2022_01_17_DLW118_male_01_Statistics	8.11	WT	SYP2GFP	813505	100309
0.129494	-0.122802	TZ	Male	DLW118	2022_01_17_DLW118_male_01_Statistics	5.61	WT	SYP2GFP	558892	99624.2
0.206376	-0.0236374	TZ	Male	DLW118	2022_01_17_DLW118_male_01_Statistics	6.26	WT	SYP2GFP	612159	97789
0.139523	-0.109865	TZ	Male	DLW118	2022_01_17_DLW118_male_01_Statistics	7.02	WT	SYP2GFP	774643	110348
0.174472	-0.0647879	TZ	Male	DLW118	2022_01_17_DLW118_male_01_Statistics	4.67	WT	SYP2GFP	481257	103053
0.279046	0.0700955	EP	Male	DLW118	2022_01_17_DLW118_male_01_Statistics	7.28	WT	SYP2GFP	788688	108336
0.288924	0.0828355	EP	Male	DLW118	2022_01_17_DLW118_male_01_Statistics	5.67	WT	SYP2GFP	578676	102059
0.308695	0.108337	EP	Male	DLW118	2022_01_17_DLW118_male_01_Statistics	8.32	WT	SYP2GFP	930344	111820
0.312987	0.113873	EP	Male	DLW118	2022_01_17_DLW118_male_01_Statistics	11.18	WT	SYP2GFP	1214870	108665
0.328177	0.133465	EP	Male	DLW118	2022_01_17_DLW118_male_01_Statistics	5.47	WT	SYP2GFP	557222	101869
0.33173	0.138047	EP	Male	DLW118	2022_01_17_DLW118_male_01_Statistics	11.48	WT	SYP2GFP	1345810	117231
0.349224	0.160612	EP	Male	DLW118	2022_01_17_DLW118_male_01_Statistics	16.33	WT	SYP2GFP	2064740	126438
0.352384	0.164688	EP	Male	DLW118	2022_01_17_DLW118_male_01_Statistics	7.77	WT	SYP2GFP	785279	101066
0.35952	0.173892	EP	Male	DLW118	2022_01_17_DLW118_male_01_Statistics	13.3	WT	SYP2GFP	1481520	111392
0.38508	0.20686	EP	Male	DLW118	2022_01_17_DLW118_male_01_Statistics	14.93	WT	SYP2GFP	1612540	108007
0.4058	0.233586	EP	Male	DLW118	2022_01_17_DLW118_male_01_Statistics	8.93	WT	SYP2GFP	909517	101850
0.416407	0.247267	EP	Male	DLW118	2022_01_17_DLW118_male_01_Statistics	15.35	WT	SYP2GFP	1728240	112589
0.438789	0.276135	EP	Male	DLW118	2022_01_17_DLW118_male_01_Statistics	34.09	WT	SYP2GFP	4524260	132715
0.450563	0.291322	EP	Male	DLW118	2022_01_17_DLW118_male_01_Statistics	13.73	WT	SYP2GFP	1515840	110403
0.451854	0.292986	EP	Male	DLW118	2022_01_17_DLW118_male_01_Statistics	25.01	WT	SYP2GFP	3575280	142954
0.485252	0.336064	MP	Male	DLW118	2022_01_17_DLW118_male_01_Statistics	35.37	WT	SYP2GFP	4728050	133674
0.499123	0.353956	MP	Male	DLW118	2022_01_17_DLW118_male_01_Statistics	20.33	WT	SYP2GFP	2295590	112916
0.526036	0.388669	MP	Male	DLW118	2022_01_17_DLW118_male_01_Statistics	40.29	WT	SYP2GFP	5403980	134127
0.567885	0.442647	MP	Male	DLW118	2022_01_17_DLW118_male_01_Statistics	40.68	WT	SYP2GFP	5773490	141925
0.603005	0.487945	MP	Male	DLW118	2022_01_17_DLW118_male_01_Statistics	25.42	WT	SYP2GFP	2930480	115282
0.646661	0.544254	MP	Male	DLW118	2022_01_17_DLW118_male_01_Statistics	34.84	WT	SYP2GFP	5105420	146539
0.668583	0.57253	MP	Male	DLW118	2022_01_17_DLW118_male_01_Statistics	47.67	WT	SYP2GFP	7421920	155694
0.692973	0.603988	MP	Male	DLW118	2022_01_17_DLW118_male_01_Statistics	42.26	WT	SYP2GFP	5662220	133985
0.705255	0.619831	MP	Male	DLW118	2022_01_17_DLW118_male_01_Statistics	39.28	WT	SYP2GFP	6041440	153804
0.749697	0.677153	LP	Male	DLW118	2022_01_17_DLW118_male_01_Statistics	42.42	WT	SYP2GFP	6714940	158297
0.737121	0.660932	MP	Male	DLW118	2022_01_17_DLW118_male_01_Statistics	36.58	WT	SYP2GFP	4856860	132774
0.77672	0.712007	LP	Male	DLW118	2022_01_17_DLW118_male_01_Statistics	30.01	WT	SYP2GFP	3659850	121954
0.812842	0.758599	LP	Male	DLW118	2022_01_17_DLW118_male_01_Statistics	42.98	WT	SYP2GFP	6373320	148286
0.788902	0.72772	LP	Male	DLW118	2022_01_17_DLW118_male_01_Statistics	44.08	WT	SYP2GFP	7371780	167236
0.829279	0.7798	LP	Male	DLW118	2022_01_17_DLW118_male_01_Statistics	44.79	WT	SYP2GFP	6867810	153334
0.814259	0.760426	LP	Male	DLW118	2022_01_17_DLW118_male_01_Statistics	34.49	WT	SYP2GFP	4707240	136481
0.850084	0.806635	LP	Male	DLW118	2022_01_17_DLW118_male_01_Statistics	37.99	WT	SYP2GFP	5593600	147239
0.855416	0.813512	LP	Male	DLW118	2022_01_17_DLW118_male_01_Statistics	47.07	WT	SYP2GFP	7307480	155247
0.867297	0.828836	LP	Male	DLW118	2022_01_17_DLW118_male_01_Statistics	47.68	WT	SYP2GFP	8582240	179997
0.888889	0.856686	LP	Male	DLW118	2022_01_17_DLW118_male_01_Statistics	42.47	WT	SYP2GFP	6847150	161223
0.904188	0.876419	LP	Male	DLW118	2022_01_17_DLW118_male_01_Statistics	44.06	WT	SYP2GFP	6737840	152924
0.926988	0.905827	LP	Male	DLW118	2022_01_17_DLW118_male_01_Statistics	43.33	WT	SYP2GFP	6983470	161169
0.886938	0.85417	LP	Male	DLW118	2022_01_17_DLW118_male_01_Statistics	32.12	WT	SYP2GFP	4243870	132125
0.961237	0.950002	LP	Male	DLW118	2022_01_17_DLW118_male_01_Statistics	35.43	WT	SYP2GFP	5065460	142971
0.950983	0.936776	LP	Male	DLW118	2022_01_17_DLW118_male_01_Statistics	42.94	WT	SYP2GFP	6338940	147623
0.932609	0.913077	LP	Male	DLW118	2022_01_17_DLW118_male_01_Statistics	39.55	WT	SYP2GFP	5225720	132129
0.994919	0.993446	LP	Male	DLW118	2022_01_17_DLW118_male_01_Statistics	41.58	WT	SYP2GFP	6861460	165018
0.976946	0.970264	LP	Male	DLW118	2022_01_17_DLW118_male_01_Statistics	37.97	WT	SYP2GFP	5485180	144461
0.99438	0.992751	LP	Male	DLW118	2022_01_17_DLW118_male_01_Statistics	39.29	WT	SYP2GFP	5432870	138276
0.123539	-0.0532804	TZ	Male	DLW118	2022_01_17_DLW118_male_01002_Statistics	8.88	WT	SYP2GFP	1247630	140499
0.160434	-0.0089424	TZ	Male	DLW118	2022_01_17_DLW118_male_01002_Statistics	8.42	WT	SYP2GFP	1114080	132314
0.0736686	-0.113212	TZ	Male	DLW118	2022_01_17_DLW118_male_01002_Statistics	8.27	WT	SYP2GFP	1033330	124949
0.096925	-0.0852636	TZ	Male	DLW118	2022_01_17_DLW118_male_01002_Statistics	8.91	WT	SYP2GFP	1175400	131919
0.162244	-0.0067669	TZ	Male	DLW118	2022_01_17_DLW118_male_01002_Statistics	8.23	WT	SYP2GFP	1047810	127316
0.128959	-0.0467671	TZ	Male	DLW118	2022_01_17_DLW118_male_01002_Statistics	9.22	WT	SYP2GFP	1333770	144661
0.178417	0.0126692	EP	Male	DLW118	2022_01_17_DLW118_male_01002_Statistics	10.52	WT	SYP2GFP	1457960	138589
0.236182	0.0820875	EP	Male	DLW118	2022_01_17_DLW118_male_01002_Statistics	17.28	WT	SYP2GFP	2541780	147094
0.211438	0.0523517	EP	Male	DLW118	2022_01_17_DLW118_male_01002_Statistics	12.77	WT	SYP2GFP	1956000	153171
0.183805	0.0191435	EP	Male	DLW118	2022_01_17_DLW118_male_01002_Statistics	8.64	WT	SYP2GFP	1130210	130811
0.183275	0.0185073	EP	Male	DLW118	2022_01_17_DLW118_male_01002_Statistics	11.79	WT	SYP2GFP	1634150	138605
0.221684	0.0646646	EP	Male	DLW118	2022_01_17_DLW118_male_01002_Statistics	12.68	WT	SYP2GFP	1934650	152575
0.243567	0.0909622	EP	Male	DLW118	2022_01_17_DLW118_male_01002_Statistics	11.74	WT	SYP2GFP	1848630	157464
0.282674	0.137959	EP	Male	DLW118	2022_01_17_DLW118_male_01002_Statistics	18.52	WT	SYP2GFP	2876160	155300
0.254538	0.104147	EP	Male	DLW118	2022_01_17_DLW118_male_01002_Statistics	9.38	WT	SYP2GFP	1416740	151038
0.301252	0.160285	EP	Male	DLW118	2022_01_17_DLW118_male_01002_Statistics	14.81	WT	SYP2GFP	2253400	152154
0.315956	0.177956	EP	Male	DLW118	2022_01_17_DLW118_male_01002_Statistics	22.55	WT	SYP2GFP	3595930	159465
0.298735	0.15726	EP	Male	DLW118	2022_01_17_DLW118_male_01002_Statistics	12.7	WT	SYP2GFP	1783340	140420
0.36517	0.237098	EP	Male	DLW118	2022_01_17_DLW118_male_01002_Statistics	27.24	WT	SYP2GFP	4052400	148767
0.342298	0.209612	EP	Male	DLW118	2022_01_17_DLW118_male_01002_Statistics	19.48	WT	SYP2GFP	2769830	142188
0.405455	0.28551	EP	Male	DLW118	2022_01_17_DLW118_male_01002_Statistics	30.7	WT	SYP2GFP	4820680	157025
0.421043	0.304243	EP	Male	DLW118	2022_01_17_DLW118_male_01002_Statistics	29.91	WT	SYP2GFP	4495900	150314
0.45353	0.343284	MP	Male	DLW118	2022_01_17_DLW118_male_01002_Statistics	35.01	WT	SYP2GFP	5850110	167098
0.436282	0.322556	EP	Male	DLW118	2022_01_17_DLW118_male_01002_Statistics	30.99	WT	SYP2GFP	4959220	160026
0.465651	0.357851	MP	Male	DLW118	2022_01_17_DLW118_male_01002_Statistics	27.33	WT	SYP2GFP	4417640	161641
0.508667	0.409544	MP	Male	DLW118	2022_01_17_DLW118_male_01002_Statistics	36.29	WT	SYP2GFP	6303550	173699
0.482483	0.378078	MP	Male	DLW118	2022_01_17_DLW118_male_01002_Statistics	33.56	WT	SYP2GFP	5923130	176494
0.50453	0.404572	MP	Male	DLW118	2022_01_17_DLW118_male_01002_Statistics	30.96	WT	SYP2GFP	4960260	160215
0.532732	0.438465	MP	Male	DLW118	2022_01_17_DLW118_male_01002_Statistics	35.04	WT	SYP2GFP	6567800	187437
0.560288	0.471579	MP	Male	DLW118	2022_01_17_DLW118_male_01002_Statistics	35.59	WT	SYP2GFP	5894580	165625
0.578432	0.493383	MP	Male	DLW118	2022_01_17_DLW118_male_01002_Statistics	42.8	WT	SYP2GFP	8046690	188007
0.605404	0.525797	MP	Male	DLW118	2022_01_17_DLW118_male_01002_Statistics	42	WT	SYP2GFP	7741300	184317
0.631742	0.557449	MP	Male	DLW118	2022_01_17_DLW118_male_01002_Statistics	46.81	WT	SYP2GFP	8673380	185289
0.648472	0.577554	MP	Male	DLW118	2022_01_17_DLW118_male_01002_Statistics	35.75	WT	SYP2GFP	7034070	196757
0.668742	0.601913	MP	Male	DLW118	2022_01_17_DLW118_male_01002_Statistics	37.86	WT	SYP2GFP	6994770	184754
0.679266	0.61456	MP	Male	DLW118	2022_01_17_DLW118_male_01002_Statistics	43.97	WT	SYP2GFP	8687660	197582
0.6892	0.626499	MP	Male	DLW118	2022_01_17_DLW118_male_01002_Statistics	40.95	WT	SYP2GFP	7577830	185051
0.742095	0.690064	LP	Male	DLW118	2022_01_17_DLW118_male_01002_Statistics	42.38	WT	SYP2GFP	7732450	182455
0.778746	0.734109	LP	Male	DLW118	2022_01_17_DLW118_male_01002_Statistics	30.02	WT	SYP2GFP	4487080	149470
0.712955	0.655046	MP	Male	DLW118	2022_01_17_DLW118_male_01002_Statistics	39.78	WT	SYP2GFP	6886110	173105
0.805681	0.766478	LP	Male	DLW118	2022_01_17_DLW118_male_01002_Statistics	34.93	WT	SYP2GFP	5615920	160776
0.751446	0.701302	LP	Male	DLW118	2022_01_17_DLW118_male_01002_Statistics	40.33	WT	SYP2GFP	6824590	169219
0.818589	0.781991	LP	Male	DLW118	2022_01_17_DLW118_male_01002_Statistics	43.08	WT	SYP2GFP	8071880	187370
0.771046	0.724856	LP	Male	DLW118	2022_01_17_DLW118_male_01002_Statistics	41.62	WT	SYP2GFP	8371620	201144
0.793159	0.75143	LP	Male	DLW118	2022_01_17_DLW118_male_01002_Statistics	32.47	WT	SYP2GFP	5489220	169055
0.851779	0.821876	LP	Male	DLW118	2022_01_17_DLW118_male_01002_Statistics	37.63	WT	SYP2GFP	5999300	159429
0.833501	0.799911	LP	Male	DLW118	2022_01_17_DLW118_male_01002_Statistics	37.23	WT	SYP2GFP	5964750	160214
0.88173	0.85787	LP	Male	DLW118	2022_01_17_DLW118_male_01002_Statistics	35.03	WT	SYP2GFP	5360380	153023
0.875728	0.850657	LP	Male	DLW118	2022_01_17_DLW118_male_01002_Statistics	32.83	WT	SYP2GFP	5058220	154073
0.920094	0.903973	LP	Male	DLW118	2022_01_17_DLW118_male_01002_Statistics	38.03	WT	SYP2GFP	6277470	165066
0.987666	0.985178	LP	Male	DLW118	2022_01_17_DLW118_male_01002_Statistics	35.07	WT	SYP2GFP	5552540	158327
0.0931349	-0.157387	TZ	Male	DLW118	2022_01_17_DLW118_male_01003_Statistics	7.63	WT	SYP2GFP	919800	120550
0.0839114	-0.169158	TZ	Male	DLW118	2022_01_17_DLW118_male_01003_Statistics	9.69	WT	SYP2GFP	1235170	127469
0.196991	-0.0248398	TZ	Male	DLW118	2022_01_17_DLW118_male_01003_Statistics	13.96	WT	SYP2GFP	1922290	137700
0.202832	-0.0173854	TZ	Male	DLW118	2022_01_17_DLW118_male_01003_Statistics	10.51	WT	SYP2GFP	1330110	126557
0.162613	-0.0687151	TZ	Male	DLW118	2022_01_17_DLW118_male_01003_Statistics	12.78	WT	SYP2GFP	1630750	127602
0.174697	-0.0532937	TZ	Male	DLW118	2022_01_17_DLW118_male_01003_Statistics	10.92	WT	SYP2GFP	1340140	122723
0.171212	-0.0577412	TZ	Male	DLW118	2022_01_17_DLW118_male_01003_Statistics	15.56	WT	SYP2GFP	2175290	139800
0.146531	-0.0892404	TZ	Male	DLW118	2022_01_17_DLW118_male_01003_Statistics	11.25	WT	SYP2GFP	1433880	127456
0.138099	-0.100001	TZ	Male	DLW118	2022_01_17_DLW118_male_01003_Statistics	9.31	WT	SYP2GFP	1205310	129464
0.111468	-0.133989	TZ	Male	DLW118	2022_01_17_DLW118_male_01003_Statistics	10.79	WT	SYP2GFP	1371700	127127
0.320907	0.133308	EP	Male	DLW118	2022_01_17_DLW118_male_01003_Statistics	23.38	WT	SYP2GFP	3156160	134994
0.284178	0.0864325	EP	Male	DLW118	2022_01_17_DLW118_male_01003_Statistics	13.94	WT	SYP2GFP	1854720	133050
0.315635	0.126579	EP	Male	DLW118	2022_01_17_DLW118_male_01003_Statistics	17.74	WT	SYP2GFP	2214330	124821
0.297315	0.103198	EP	Male	DLW118	2022_01_17_DLW118_male_01003_Statistics	18.11	WT	SYP2GFP	2453370	135470
0.24711	0.0391244	EP	Male	DLW118	2022_01_17_DLW118_male_01003_Statistics	17.61	WT	SYP2GFP	2300960	130662
0.271555	0.0703218	EP	Male	DLW118	2022_01_17_DLW118_male_01003_Statistics	12.02	WT	SYP2GFP	1529380	127236
0.25727	0.0520904	EP	Male	DLW118	2022_01_17_DLW118_male_01003_Statistics	19.05	WT	SYP2GFP	2563700	134577
0.238639	0.0283128	EP	Male	DLW118	2022_01_17_DLW118_male_01003_Statistics	10.15	WT	SYP2GFP	1256750	123818
0.227148	0.0136469	EP	Male	DLW118	2022_01_17_DLW118_male_01003_Statistics	16.93	WT	SYP2GFP	2264960	133784
0.31883	0.130657	EP	Male	DLW118	2022_01_17_DLW118_male_01003_Statistics	7.1	WT	SYP2GFP	755685	106435
0.417017	0.255967	EP	Male	DLW118	2022_01_17_DLW118_male_01003_Statistics	29.74	WT	SYP2GFP	4410710	148309
0.394226	0.22688	EP	Male	DLW118	2022_01_17_DLW118_male_01003_Statistics	23.08	WT	SYP2GFP	3118780	135129
0.439023	0.284053	EP	Male	DLW118	2022_01_17_DLW118_male_01003_Statistics	27.41	WT	SYP2GFP	3825030	139549
0.380363	0.209188	EP	Male	DLW118	2022_01_17_DLW118_male_01003_Statistics	25.52	WT	SYP2GFP	3529670	138310
0.368637	0.194223	EP	Male	DLW118	2022_01_17_DLW118_male_01003_Statistics	21.08	WT	SYP2GFP	2877910	136523
0.334605	0.15079	EP	Male	DLW118	2022_01_17_DLW118_male_01003_Statistics	21.03	WT	SYP2GFP	2844550	135262
0.479956	0.336293	MP	Male	DLW118	2022_01_17_DLW118_male_01003_Statistics	24.38	WT	SYP2GFP	3155430	129427
0.51641	0.382818	MP	Male	DLW118	2022_01_17_DLW118_male_01003_Statistics	27.1	WT	SYP2GFP	3568970	131696
0.558015	0.435917	MP	Male	DLW118	2022_01_17_DLW118_male_01003_Statistics	27.19	WT	SYP2GFP	3602050	132477
0.506045	0.36959	MP	Male	DLW118	2022_01_17_DLW118_male_01003_Statistics	29.77	WT	SYP2GFP	4675610	157058
0.546975	0.421827	MP	Male	DLW118	2022_01_17_DLW118_male_01003_Statistics	34.5	WT	SYP2GFP	5211520	151059
0.583663	0.468649	MP	Male	DLW118	2022_01_17_DLW118_male_01003_Statistics	32.23	WT	SYP2GFP	5252110	162957
0.540985	0.414182	MP	Male	DLW118	2022_01_17_DLW118_male_01003_Statistics	40.08	WT	SYP2GFP	5852110	146011
0.588321	0.474594	MP	Male	DLW118	2022_01_17_DLW118_male_01003_Statistics	38.68	WT	SYP2GFP	6035920	156048
0.470761	0.324559	EP	Male	DLW118	2022_01_17_DLW118_male_01003_Statistics	27.9	WT	SYP2GFP	4137710	148305
0.677448	0.588343	MP	Male	DLW118	2022_01_17_DLW118_male_01003_Statistics	37.17	WT	SYP2GFP	5797440	155971
0.708798	0.628354	MP	Male	DLW118	2022_01_17_DLW118_male_01003_Statistics	43.61	WT	SYP2GFP	7401900	169729
0.614139	0.507544	MP	Male	DLW118	2022_01_17_DLW118_male_01003_Statistics	32.56	WT	SYP2GFP	5072910	155802
0.640358	0.541006	MP	Male	DLW118	2022_01_17_DLW118_male_01003_Statistics	38.88	WT	SYP2GFP	5973420	153637
0.739674	0.667758	LP	Male	DLW118	2022_01_17_DLW118_male_01003_Statistics	46.03	WT	SYP2GFP	7905660	171750
0.685549	0.598681	MP	Male	DLW118	2022_01_17_DLW118_male_01003_Statistics	44.44	WT	SYP2GFP	7484700	168423
0.622948	0.518787	MP	Male	DLW118	2022_01_17_DLW118_male_01003_Statistics	41.3	WT	SYP2GFP	6633050	160607
0.915509	0.892169	LP	Male	DLW118	2022_01_17_DLW118_male_01003_Statistics	38.63	WT	SYP2GFP	6252700	161861
0.816918	0.766341	LP	Male	DLW118	2022_01_17_DLW118_male_01003_Statistics	26.79	WT	SYP2GFP	3734740	139408
0.874745	0.840144	LP	Male	DLW118	2022_01_17_DLW118_male_01003_Statistics	43.39	WT	SYP2GFP	7002060	161375
0.763249	0.697847	LP	Male	DLW118	2022_01_17_DLW118_male_01003_Statistics	37.92	WT	SYP2GFP	5769140	152140
0.828605	0.781258	LP	Male	DLW118	2022_01_17_DLW118_male_01003_Statistics	46.48	WT	SYP2GFP	8638240	185849
0.783263	0.72339	LP	Male	DLW118	2022_01_17_DLW118_male_01003_Statistics	39.71	WT	SYP2GFP	6515260	164071
0.855928	0.816128	LP	Male	DLW118	2022_01_17_DLW118_male_01003_Statistics	33.92	WT	SYP2GFP	4899200	144434
0.958304	0.946785	LP	Male	DLW118	2022_01_17_DLW118_male_01003_Statistics	37.77	WT	SYP2GFP	6046040	160075
0.891296	0.861267	LP	Male	DLW118	2022_01_17_DLW118_male_01003_Statistics	32.84	WT	SYP2GFP	4509400	137314
0.999993	0.999991	LP	Male	DLW118	2022_01_17_DLW118_male_01003_Statistics	38.73	WT	SYP2GFP	6336460	163606
0.93193	0.913125	LP	Male	DLW118	2022_01_17_DLW118_male_01003_Statistics	41.02	WT	SYP2GFP	6105260	148836
0.184493	-0.0191546	TZ	Male	DLW118	2022_01_17_DLW118_male_01004_Statistics	13.88	WT	SYP2GFP	1828880	131764
0.160791	-0.0487751	TZ	Male	DLW118	2022_01_17_DLW118_male_01004_Statistics	10.28	WT	SYP2GFP	1181270	114910
0.159782	-0.0500364	TZ	Male	DLW118	2022_01_17_DLW118_male_01004_Statistics	11.44	WT	SYP2GFP	1275590	111503
0.19982	0	EP	Male	DLW118	2022_01_17_DLW118_male_01004_Statistics	12.5	WT	SYP2GFP	1493440	119475
0.263827	0.0799904	EP	Male	DLW118	2022_01_17_DLW118_male_01004_Statistics	16.56	WT	SYP2GFP	2210080	133459
0.238881	0.0488149	EP	Male	DLW118	2022_01_17_DLW118_male_01004_Statistics	21.26	WT	SYP2GFP	2986790	140489
0.234891	0.0438286	EP	Male	DLW118	2022_01_17_DLW118_male_01004_Statistics	16.34	WT	SYP2GFP	2130140	130364
0.201963	0.00267822	EP	Male	DLW118	2022_01_17_DLW118_male_01004_Statistics	16.52	WT	SYP2GFP	2051690	124194
0.256013	0.070225	EP	Male	DLW118	2022_01_17_DLW118_male_01004_Statistics	14.58	WT	SYP2GFP	1751060	120100
0.201889	0.0025853	EP	Male	DLW118	2022_01_17_DLW118_male_01004_Statistics	15	WT	SYP2GFP	1965580	131039
0.379425	0.224455	EP	Male	DLW118	2022_01_17_DLW118_male_01004_Statistics	15.26	WT	SYP2GFP	1822280	119415
0.417785	0.272395	EP	Male	DLW118	2022_01_17_DLW118_male_01004_Statistics	20.05	WT	SYP2GFP	2343860	116901
0.336362	0.170639	EP	Male	DLW118	2022_01_17_DLW118_male_01004_Statistics	20.81	WT	SYP2GFP	2826030	135802
0.371307	0.214311	EP	Male	DLW118	2022_01_17_DLW118_male_01004_Statistics	19.73	WT	SYP2GFP	2924970	148250
0.401711	0.252307	EP	Male	DLW118	2022_01_17_DLW118_male_01004_Statistics	24.71	WT	SYP2GFP	3181150	128739
0.279819	0.0999759	EP	Male	DLW118	2022_01_17_DLW118_male_01004_Statistics	18.06	WT	SYP2GFP	2337780	129445
0.441595	0.30215	EP	Male	DLW118	2022_01_17_DLW118_male_01004_Statistics	32.28	WT	SYP2GFP	4357990	135006
0.313295	0.141812	EP	Male	DLW118	2022_01_17_DLW118_male_01004_Statistics	21.6	WT	SYP2GFP	2723100	126069
0.346538	0.183356	EP	Male	DLW118	2022_01_17_DLW118_male_01004_Statistics	25.87	WT	SYP2GFP	3565110	137809
0.384953	0.231364	EP	Male	DLW118	2022_01_17_DLW118_male_01004_Statistics	26.2	WT	SYP2GFP	3565460	136086
0.426062	0.282739	EP	Male	DLW118	2022_01_17_DLW118_male_01004_Statistics	31.58	WT	SYP2GFP	4473440	141654
0.289071	0.111539	EP	Male	DLW118	2022_01_17_DLW118_male_01004_Statistics	17.21	WT	SYP2GFP	2324300	135055
0.349327	0.186842	EP	Male	DLW118	2022_01_17_DLW118_male_01004_Statistics	16.19	WT	SYP2GFP	2054230	126883
0.513824	0.392417	MP	Male	DLW118	2022_01_17_DLW118_male_01004_Statistics	35.99	WT	SYP2GFP	5043180	140127
0.553075	0.441469	MP	Male	DLW118	2022_01_17_DLW118_male_01004_Statistics	36.64	WT	SYP2GFP	5291540	144420
0.466255	0.332969	EP	Male	DLW118	2022_01_17_DLW118_male_01004_Statistics	29.54	WT	SYP2GFP	3910420	132377
0.582705	0.478499	MP	Male	DLW118	2022_01_17_DLW118_male_01004_Statistics	41.92	WT	SYP2GFP	6510240	155302
0.486737	0.358566	MP	Male	DLW118	2022_01_17_DLW118_male_01004_Statistics	35.59	WT	SYP2GFP	5377380	151092
0.53793	0.422542	MP	Male	DLW118	2022_01_17_DLW118_male_01004_Statistics	32.82	WT	SYP2GFP	4662280	142056
0.58243	0.478155	MP	Male	DLW118	2022_01_17_DLW118_male_01004_Statistics	46.86	WT	SYP2GFP	7603070	162251
0.500837	0.376187	MP	Male	DLW118	2022_01_17_DLW118_male_01004_Statistics	34.95	WT	SYP2GFP	5196350	148680
0.591047	0.488923	MP	Male	DLW118	2022_01_17_DLW118_male_01004_Statistics	32.7	WT	SYP2GFP	4439530	135765
0.745546	0.682004	LP	Male	DLW118	2022_01_17_DLW118_male_01004_Statistics	44.34	WT	SYP2GFP	7154300	161351
0.635745	0.544784	MP	Male	DLW118	2022_01_17_DLW118_male_01004_Statistics	47.31	WT	SYP2GFP	7875450	166465
0.70264	0.628384	MP	Male	DLW118	2022_01_17_DLW118_male_01004_Statistics	45.8	WT	SYP2GFP	7694300	167998
0.618715	0.5235	MP	Male	DLW118	2022_01_17_DLW118_male_01004_Statistics	45.8	WT	SYP2GFP	7098800	154996
0.678995	0.598834	MP	Male	DLW118	2022_01_17_DLW118_male_01004_Statistics	38.64	WT	SYP2GFP	5907660	152890
0.651988	0.565083	MP	Male	DLW118	2022_01_17_DLW118_male_01004_Statistics	35.16	WT	SYP2GFP	4605510	130987
0.723567	0.654536	MP	Male	DLW118	2022_01_17_DLW118_male_01004_Statistics	43.1	WT	SYP2GFP	6565270	152326
0.693956	0.617531	MP	Male	DLW118	2022_01_17_DLW118_male_01004_Statistics	36.22	WT	SYP2GFP	5224180	144235
0.76503	0.706354	LP	Male	DLW118	2022_01_17_DLW118_male_01004_Statistics	45.14	WT	SYP2GFP	7098550	157256
0.835983	0.795025	LP	Male	DLW118	2022_01_17_DLW118_male_01004_Statistics	43.65	WT	SYP2GFP	6641550	152155
0.806608	0.758315	LP	Male	DLW118	2022_01_17_DLW118_male_01004_Statistics	41.25	WT	SYP2GFP	6363020	154255
0.875141	0.843961	LP	Male	DLW118	2022_01_17_DLW118_male_01004_Statistics	46.98	WT	SYP2GFP	7230290	153901
0.83867	0.798383	LP	Male	DLW118	2022_01_17_DLW118_male_01004_Statistics	37.72	WT	SYP2GFP	5324480	141158
0.910191	0.887764	LP	Male	DLW118	2022_01_17_DLW118_male_01004_Statistics	40.98	WT	SYP2GFP	6193080	151124
0.868644	0.835841	LP	Male	DLW118	2022_01_17_DLW118_male_01004_Statistics	29.09	WT	SYP2GFP	3731110	128261
0.948931	0.936179	LP	Male	DLW118	2022_01_17_DLW118_male_01004_Statistics	41.25	WT	SYP2GFP	6269770	151994
0.89985	0.874841	LP	Male	DLW118	2022_01_17_DLW118_male_01004_Statistics	32.25	WT	SYP2GFP	4190850	129949
0.931411	0.914283	LP	Male	DLW118	2022_01_17_DLW118_male_01004_Statistics	27.83	WT	SYP2GFP	3649970	131152
0.988995	0.986246	LP	Male	DLW118	2022_01_17_DLW118_male_01004_Statistics	33.98	WT	SYP2GFP	5003770	147256
0.967821	0.959786	LP	Male	DLW118	2022_01_17_DLW118_male_01004_Statistics	35.43	WT	SYP2GFP	4791190	135230
0.775823	0.719842	LP	Male	DLW118	2022_01_17_DLW118_male_01004_Statistics	49.49	WT	SYP2GFP	7672540	155032
0.119871	-0.0259183	TZ	Male	DLW118	2022_01_17_DLW118_male_01005_Statistics	10.46	WT	SYP2GFP	1165810	111454
0.13035	-0.0137034	TZ	Male	DLW118	2022_01_17_DLW118_male_01005_Statistics	11.65	WT	SYP2GFP	1375480	118067
0.252	0.128097	EP	Male	DLW118	2022_01_17_DLW118_male_01005_Statistics	15.03	WT	SYP2GFP	1748320	116322
0.228202	0.100358	EP	Male	DLW118	2022_01_17_DLW118_male_01005_Statistics	16.3	WT	SYP2GFP	2215230	135904
0.256728	0.133609	EP	Male	DLW118	2022_01_17_DLW118_male_01005_Statistics	15.6	WT	SYP2GFP	1946950	124804
0.235595	0.108975	EP	Male	DLW118	2022_01_17_DLW118_male_01005_Statistics	15.56	WT	SYP2GFP	1951920	125445
0.183578	0.0483412	EP	Male	DLW118	2022_01_17_DLW118_male_01005_Statistics	14.44	WT	SYP2GFP	1713780	118683
0.199718	0.0671554	EP	Male	DLW118	2022_01_17_DLW118_male_01005_Statistics	17.29	WT	SYP2GFP	2137840	123646
0.149384	0.00848365	EP	Male	DLW118	2022_01_17_DLW118_male_01005_Statistics	14.96	WT	SYP2GFP	1833200	122540
0.372731	0.268827	EP	Male	DLW118	2022_01_17_DLW118_male_01005_Statistics	14	WT	SYP2GFP	1678700	119907
0.337435	0.227684	EP	Male	DLW118	2022_01_17_DLW118_male_01005_Statistics	17.49	WT	SYP2GFP	2082080	119044
0.383565	0.281456	EP	Male	DLW118	2022_01_17_DLW118_male_01005_Statistics	23.37	WT	SYP2GFP	2810010	120240
0.360441	0.254501	EP	Male	DLW118	2022_01_17_DLW118_male_01005_Statistics	21.96	WT	SYP2GFP	2738150	124688
0.298859	0.182718	EP	Male	DLW118	2022_01_17_DLW118_male_01005_Statistics	12.69	WT	SYP2GFP	1460380	115081
0.347697	0.239647	EP	Male	DLW118	2022_01_17_DLW118_male_01005_Statistics	19.81	WT	SYP2GFP	2328830	117558
0.321573	0.209195	EP	Male	DLW118	2022_01_17_DLW118_male_01005_Statistics	20.35	WT	SYP2GFP	2505360	123114
0.290901	0.173443	EP	Male	DLW118	2022_01_17_DLW118_male_01005_Statistics	18.58	WT	SYP2GFP	2347650	126354
0.304248	0.189	EP	Male	DLW118	2022_01_17_DLW118_male_01005_Statistics	18.6	WT	SYP2GFP	2247130	120813
0.271112	0.150375	EP	Male	DLW118	2022_01_17_DLW118_male_01005_Statistics	13.64	WT	SYP2GFP	1593300	116811
0.495518	0.411952	MP	Male	DLW118	2022_01_17_DLW118_male_01005_Statistics	28.39	WT	SYP2GFP	3512410	123720
0.516491	0.436401	MP	Male	DLW118	2022_01_17_DLW118_male_01005_Statistics	42.85	WT	SYP2GFP	6321930	147536
0.485933	0.40078	MP	Male	DLW118	2022_01_17_DLW118_male_01005_Statistics	36.83	WT	SYP2GFP	4966640	134853
0.458624	0.368947	MP	Male	DLW118	2022_01_17_DLW118_male_01005_Statistics	19.84	WT	SYP2GFP	2325870	117231
0.460778	0.371459	MP	Male	DLW118	2022_01_17_DLW118_male_01005_Statistics	33.15	WT	SYP2GFP	4987010	150438
0.416088	0.319365	EP	Male	DLW118	2022_01_17_DLW118_male_01005_Statistics	17.9	WT	SYP2GFP	2151410	120191
0.435845	0.342395	MP	Male	DLW118	2022_01_17_DLW118_male_01005_Statistics	28.3	WT	SYP2GFP	3891560	137511
0.415251	0.31839	EP	Male	DLW118	2022_01_17_DLW118_male_01005_Statistics	25.33	WT	SYP2GFP	3126290	123422
0.397875	0.298136	EP	Male	DLW118	2022_01_17_DLW118_male_01005_Statistics	23.63	WT	SYP2GFP	2986730	126396
0.771896	0.734111	LP	Male	DLW118	2022_01_17_DLW118_male_01005_Statistics	46.39	WT	SYP2GFP	7116060	153396
0.753408	0.712561	LP	Male	DLW118	2022_01_17_DLW118_male_01005_Statistics	51.93	WT	SYP2GFP	9368390	180404
0.712962	0.665415	MP	Male	DLW118	2022_01_17_DLW118_male_01005_Statistics	45.79	WT	SYP2GFP	8113120	177181
0.731006	0.686449	LP	Male	DLW118	2022_01_17_DLW118_male_01005_Statistics	42.15	WT	SYP2GFP	6654770	157883
0.683516	0.631092	MP	Male	DLW118	2022_01_17_DLW118_male_01005_Statistics	44.54	WT	SYP2GFP	7033120	157906
0.658843	0.602332	MP	Male	DLW118	2022_01_17_DLW118_male_01005_Statistics	27.46	WT	SYP2GFP	3346240	121859
0.666008	0.610683	MP	Male	DLW118	2022_01_17_DLW118_male_01005_Statistics	44.41	WT	SYP2GFP	7319120	164808
0.645392	0.586653	MP	Male	DLW118	2022_01_17_DLW118_male_01005_Statistics	37.25	WT	SYP2GFP	6117530	164229
0.621563	0.558877	MP	Male	DLW118	2022_01_17_DLW118_male_01005_Statistics	33.56	WT	SYP2GFP	4309260	128405
0.60433	0.538789	MP	Male	DLW118	2022_01_17_DLW118_male_01005_Statistics	43.61	WT	SYP2GFP	7216850	165486
0.585896	0.517301	MP	Male	DLW118	2022_01_17_DLW118_male_01005_Statistics	32.39	WT	SYP2GFP	4543650	140279
0.566735	0.494966	MP	Male	DLW118	2022_01_17_DLW118_male_01005_Statistics	42.51	WT	SYP2GFP	6956220	163637
0.558772	0.485685	MP	Male	DLW118	2022_01_17_DLW118_male_01005_Statistics	34.72	WT	SYP2GFP	4891390	140881
0.535595	0.458669	MP	Male	DLW118	2022_01_17_DLW118_male_01005_Statistics	37.83	WT	SYP2GFP	5513120	145734
0.9675	0.962117	LP	Male	DLW118	2022_01_17_DLW118_male_01005_Statistics	39.62	WT	SYP2GFP	5512280	139129
0.98493	0.982433	LP	Male	DLW118	2022_01_17_DLW118_male_01005_Statistics	36.26	WT	SYP2GFP	5158500	142264
0.943008	0.933568	LP	Male	DLW118	2022_01_17_DLW118_male_01005_Statistics	40.31	WT	SYP2GFP	5900030	146366
0.927487	0.915476	LP	Male	DLW118	2022_01_17_DLW118_male_01005_Statistics	40.19	WT	SYP2GFP	6240970	155287
0.889294	0.870956	LP	Male	DLW118	2022_01_17_DLW118_male_01005_Statistics	40.36	WT	SYP2GFP	5764010	142815
0.948822	0.940345	LP	Male	DLW118	2022_01_17_DLW118_male_01005_Statistics	30.52	WT	SYP2GFP	3708060	121496
0.906524	0.89104	LP	Male	DLW118	2022_01_17_DLW118_male_01005_Statistics	37.09	WT	SYP2GFP	5561840	149955
0.848714	0.823655	LP	Male	DLW118	2022_01_17_DLW118_male_01005_Statistics	44.19	WT	SYP2GFP	7486160	169408
0.91642	0.902576	LP	Male	DLW118	2022_01_17_DLW118_male_01005_Statistics	27.19	WT	SYP2GFP	3505910	128941
0.853509	0.829244	LP	Male	DLW118	2022_01_17_DLW118_male_01005_Statistics	33.32	WT	SYP2GFP	4326120	129836
0.83721	0.810245	LP	Male	DLW118	2022_01_17_DLW118_male_01005_Statistics	41.36	WT	SYP2GFP	6285370	151967
0.806429	0.774365	LP	Male	DLW118	2022_01_17_DLW118_male_01005_Statistics	39.66	WT	SYP2GFP	5911580	149056
1	1	LP	Male	DLW118	2022_01_17_DLW118_male_01005_Statistics	37.79	WT	SYP2GFP	5550820	146886
0.04288	-0.141511	TZ	Male	DLW118	2022_01_17_DLW118_male_01007_Statistics	6.61	WT	SYP2GFP	750846	113592
0.0201221	-0.168653	TZ	Male	DLW118	2022_01_17_DLW118_male_01007_Statistics	9.79	WT	SYP2GFP	1131910	115619
0.00218759	-0.190043	TZ	Male	DLW118	2022_01_17_DLW118_male_01007_Statistics	5.69	WT	SYP2GFP	637193	111985
0.0509036	-0.131942	TZ	Male	DLW118	2022_01_17_DLW118_male_01007_Statistics	7.9	WT	SYP2GFP	911596	115392
0.0310388	-0.155634	TZ	Male	DLW118	2022_01_17_DLW118_male_01007_Statistics	6.04	WT	SYP2GFP	697121	115417
0.0714437	-0.107445	TZ	Male	DLW118	2022_01_17_DLW118_male_01007_Statistics	5.38	WT	SYP2GFP	601488	111801
0.117897	-0.0520415	TZ	Male	DLW118	2022_01_17_DLW118_male_01007_Statistics	4.22	WT	SYP2GFP	470949	111599
0.140951	-0.0245461	TZ	Male	DLW118	2022_01_17_DLW118_male_01007_Statistics	8.36	WT	SYP2GFP	982253	117494
0.135337	-0.0312422	TZ	Male	DLW118	2022_01_17_DLW118_male_01007_Statistics	7.42	WT	SYP2GFP	862365	116222
0.0877837	-0.0879567	TZ	Male	DLW118	2022_01_17_DLW118_male_01007_Statistics	6.07	WT	SYP2GFP	661027	108901
0.161533	0	EP	Male	DLW118	2022_01_17_DLW118_male_01007_Statistics	9.75	WT	SYP2GFP	1148890	117835
0.207037	0.0542706	EP	Male	DLW118	2022_01_17_DLW118_male_01007_Statistics	10.04	WT	SYP2GFP	1265250	126021
0.20428	0.0509833	EP	Male	DLW118	2022_01_17_DLW118_male_01007_Statistics	12.27	WT	SYP2GFP	1585560	129222
0.16975	0.00980079	EP	Male	DLW118	2022_01_17_DLW118_male_01007_Statistics	9.34	WT	SYP2GFP	1207050	129234
0.412772	0.299642	EP	Male	DLW118	2022_01_17_DLW118_male_01007_Statistics	29.17	WT	SYP2GFP	4131370	141631
0.369555	0.248098	EP	Male	DLW118	2022_01_17_DLW118_male_01007_Statistics	24.11	WT	SYP2GFP	3332240	138210
0.391254	0.273977	EP	Male	DLW118	2022_01_17_DLW118_male_01007_Statistics	22.77	WT	SYP2GFP	3579950	157222
0.349221	0.223847	EP	Male	DLW118	2022_01_17_DLW118_male_01007_Statistics	23.83	WT	SYP2GFP	3268120	137143
0.40345	0.288523	EP	Male	DLW118	2022_01_17_DLW118_male_01007_Statistics	18.03	WT	SYP2GFP	2256010	125125
0.296963	0.161522	EP	Male	DLW118	2022_01_17_DLW118_male_01007_Statistics	18.26	WT	SYP2GFP	2522510	138144
0.321619	0.190928	EP	Male	DLW118	2022_01_17_DLW118_male_01007_Statistics	23.1	WT	SYP2GFP	3156040	136625
0.318413	0.187104	EP	Male	DLW118	2022_01_17_DLW118_male_01007_Statistics	14.17	WT	SYP2GFP	1653250	116673
0.270099	0.129482	EP	Male	DLW118	2022_01_17_DLW118_male_01007_Statistics	18.41	WT	SYP2GFP	2534210	137654
0.282469	0.144235	EP	Male	DLW118	2022_01_17_DLW118_male_01007_Statistics	11.39	WT	SYP2GFP	1386770	121753
0.251219	0.106965	EP	Male	DLW118	2022_01_17_DLW118_male_01007_Statistics	14.33	WT	SYP2GFP	1867100	130293
0.518686	0.42596	MP	Male	DLW118	2022_01_17_DLW118_male_01007_Statistics	31.49	WT	SYP2GFP	4838060	153638
0.474496	0.373257	MP	Male	DLW118	2022_01_17_DLW118_male_01007_Statistics	28.1	WT	SYP2GFP	4342270	154529
0.528836	0.438065	MP	Male	DLW118	2022_01_17_DLW118_male_01007_Statistics	30.53	WT	SYP2GFP	4758840	155874
0.485963	0.386932	MP	Male	DLW118	2022_01_17_DLW118_male_01007_Statistics	27.82	WT	SYP2GFP	4143590	148943
0.539496	0.450779	MP	Male	DLW118	2022_01_17_DLW118_male_01007_Statistics	23.02	WT	SYP2GFP	3028300	131551
0.439564	0.331594	EP	Male	DLW118	2022_01_17_DLW118_male_01007_Statistics	27	WT	SYP2GFP	3842220	142304
0.504275	0.408772	MP	Male	DLW118	2022_01_17_DLW118_male_01007_Statistics	12.36	WT	SYP2GFP	1506440	121880
0.454953	0.349948	MP	Male	DLW118	2022_01_17_DLW118_male_01007_Statistics	21	WT	SYP2GFP	2564810	122134
0.56387	0.479849	MP	Male	DLW118	2022_01_17_DLW118_male_01007_Statistics	37.8	WT	SYP2GFP	6178120	163442
0.61478	0.540566	MP	Male	DLW118	2022_01_17_DLW118_male_01007_Statistics	41.64	WT	SYP2GFP	7315700	175689
0.666951	0.602788	MP	Male	DLW118	2022_01_17_DLW118_male_01007_Statistics	41.96	WT	SYP2GFP	7555850	180073
0.589977	0.510985	MP	Male	DLW118	2022_01_17_DLW118_male_01007_Statistics	28.87	WT	SYP2GFP	4193280	145247
0.636735	0.566752	MP	Male	DLW118	2022_01_17_DLW118_male_01007_Statistics	34.84	WT	SYP2GFP	4923640	141321
0.718496	0.664263	MP	Male	DLW118	2022_01_17_DLW118_male_01007_Statistics	42.35	WT	SYP2GFP	7474280	176488
0.77067	0.726489	LP	Male	DLW118	2022_01_17_DLW118_male_01007_Statistics	48.06	WT	SYP2GFP	8530570	177498
0.688529	0.628523	MP	Male	DLW118	2022_01_17_DLW118_male_01007_Statistics	35.76	WT	SYP2GFP	5325080	148912
0.738184	0.687745	LP	Male	DLW118	2022_01_17_DLW118_male_01007_Statistics	39.58	WT	SYP2GFP	6041060	152629
0.788793	0.748103	LP	Male	DLW118	2022_01_17_DLW118_male_01007_Statistics	40.93	WT	SYP2GFP	6451320	157618
0.819052	0.784192	LP	Male	DLW118	2022_01_17_DLW118_male_01007_Statistics	44.01	WT	SYP2GFP	7132310	162061
0.870717	0.84581	LP	Male	DLW118	2022_01_17_DLW118_male_01007_Statistics	43.2	WT	SYP2GFP	7463430	172765
0.849241	0.820196	LP	Male	DLW118	2022_01_17_DLW118_male_01007_Statistics	32.19	WT	SYP2GFP	4690030	145698
0.93013	0.916669	LP	Male	DLW118	2022_01_17_DLW118_male_01007_Statistics	44.04	WT	SYP2GFP	7058200	160268
0.894657	0.874363	LP	Male	DLW118	2022_01_17_DLW118_male_01007_Statistics	32.65	WT	SYP2GFP	4823350	147729
0.918804	0.903161	LP	Male	DLW118	2022_01_17_DLW118_male_01007_Statistics	15.93	WT	SYP2GFP	1909610	119875
0.982633	0.979287	LP	Male	DLW118	2022_01_17_DLW118_male_01007_Statistics	38.12	WT	SYP2GFP	6259440	164204
0.955133	0.946489	LP	Male	DLW118	2022_01_17_DLW118_male_01007_Statistics	27.08	WT	SYP2GFP	3650770	134814
0.991339	0.989671	LP	Male	DLW118	2022_01_17_DLW118_male_01007_Statistics	27.62	WT	SYP2GFP	3695230	133788
0.0201776	-0.296559	TZ	Herm	DLW197	2022_01_19_DLW197_gfpsyp2_herm_01010_Statistics	11.19	syp-2het	SYP2GFP	1027810	91850.8
0.119302	-0.165392	TZ	Herm	DLW197	2022_01_19_DLW197_gfpsyp2_herm_01010_Statistics	10.95	syp-2het	SYP2GFP	1032100	94255.7
0.107513	-0.180992	TZ	Herm	DLW197	2022_01_19_DLW197_gfpsyp2_herm_01010_Statistics	11.37	syp-2het	SYP2GFP	1129330	99325.4
0.101102	-0.189475	TZ	Herm	DLW197	2022_01_19_DLW197_gfpsyp2_herm_01010_Statistics	8.1	syp-2het	SYP2GFP	810521	100064
0.144009	-0.132698	TZ	Herm	DLW197	2022_01_19_DLW197_gfpsyp2_herm_01010_Statistics	11.75	syp-2het	SYP2GFP	1171220	99678.3
0.130433	-0.150662	TZ	Herm	DLW197	2022_01_19_DLW197_gfpsyp2_herm_01010_Statistics	12.81	syp-2het	SYP2GFP	1323010	103279
0.119631	-0.164957	TZ	Herm	DLW197	2022_01_19_DLW197_gfpsyp2_herm_01010_Statistics	9.79	syp-2het	SYP2GFP	1019380	104125
0.20272	-0.0550081	TZ	Herm	DLW197	2022_01_19_DLW197_gfpsyp2_herm_01010_Statistics	18.48	syp-2het	SYP2GFP	1915150	103634
0.171274	-0.096619	TZ	Herm	DLW197	2022_01_19_DLW197_gfpsyp2_herm_01010_Statistics	16.54	syp-2het	SYP2GFP	1659030	100304
0.228412	-0.0210114	TZ	Herm	DLW197	2022_01_19_DLW197_gfpsyp2_herm_01010_Statistics	20.4	syp-2het	SYP2GFP	2013150	98683.8
0.16121	-0.109937	TZ	Herm	DLW197	2022_01_19_DLW197_gfpsyp2_herm_01010_Statistics	15.19	syp-2het	SYP2GFP	1651260	108707
0.195772	-0.0642016	TZ	Herm	DLW197	2022_01_19_DLW197_gfpsyp2_herm_01010_Statistics	18.33	syp-2het	SYP2GFP	1895450	103407
0.149184	-0.12585	TZ	Herm	DLW197	2022_01_19_DLW197_gfpsyp2_herm_01010_Statistics	9.95	syp-2het	SYP2GFP	997223	100223
0.22047	-0.0315207	TZ	Herm	DLW197	2022_01_19_DLW197_gfpsyp2_herm_01010_Statistics	17.03	syp-2het	SYP2GFP	1878090	110281
0.18727	-0.0754527	TZ	Herm	DLW197	2022_01_19_DLW197_gfpsyp2_herm_01010_Statistics	14.83	syp-2het	SYP2GFP	1484250	100084
0.213273	-0.0410433	TZ	Herm	DLW197	2022_01_19_DLW197_gfpsyp2_herm_01010_Statistics	16.76	syp-2het	SYP2GFP	1950970	116406
0.171283	-0.0966075	TZ	Herm	DLW197	2022_01_19_DLW197_gfpsyp2_herm_01010_Statistics	13.04	syp-2het	SYP2GFP	1308940	100379
0.232606	-0.0154616	TZ	Herm	DLW197	2022_01_19_DLW197_gfpsyp2_herm_01010_Statistics	12.96	syp-2het	SYP2GFP	1305860	100761
0.177245	-0.088718	TZ	Herm	DLW197	2022_01_19_DLW197_gfpsyp2_herm_01010_Statistics	13.81	syp-2het	SYP2GFP	1426720	103311
0.203101	-0.0545036	TZ	Herm	DLW197	2022_01_19_DLW197_gfpsyp2_herm_01010_Statistics	15.1	syp-2het	SYP2GFP	1818340	120420
0.225726	-0.0245656	TZ	Herm	DLW197	2022_01_19_DLW197_gfpsyp2_herm_01010_Statistics	13.76	syp-2het	SYP2GFP	1434800	104273
0.221112	-0.0306707	TZ	Herm	DLW197	2022_01_19_DLW197_gfpsyp2_herm_01010_Statistics	13.07	syp-2het	SYP2GFP	1228010	93956.4
0.249531	0.00693498	EP	Herm	DLW197	2022_01_19_DLW197_gfpsyp2_herm_01010_Statistics	19.81	syp-2het	SYP2GFP	2227760	112456
0.271239	0.0356604	EP	Herm	DLW197	2022_01_19_DLW197_gfpsyp2_herm_01010_Statistics	21.83	syp-2het	SYP2GFP	2623760	120191
0.25552	0.0148595	EP	Herm	DLW197	2022_01_19_DLW197_gfpsyp2_herm_01010_Statistics	22.38	syp-2het	SYP2GFP	2478980	110768
0.297031	0.0697894	EP	Herm	DLW197	2022_01_19_DLW197_gfpsyp2_herm_01010_Statistics	18.5	syp-2het	SYP2GFP	2111490	114135
0.245087	0.00105396	EP	Herm	DLW197	2022_01_19_DLW197_gfpsyp2_herm_01010_Statistics	15.58	syp-2het	SYP2GFP	1642170	105402
0.28782	0.0576007	EP	Herm	DLW197	2022_01_19_DLW197_gfpsyp2_herm_01010_Statistics	23.75	syp-2het	SYP2GFP	2691490	113326
0.259703	0.0203947	EP	Herm	DLW197	2022_01_19_DLW197_gfpsyp2_herm_01010_Statistics	18.5	syp-2het	SYP2GFP	2127460	114998
0.272903	0.0378623	EP	Herm	DLW197	2022_01_19_DLW197_gfpsyp2_herm_01010_Statistics	22.06	syp-2het	SYP2GFP	2564210	116238
0.338669	0.124887	EP	Herm	DLW197	2022_01_19_DLW197_gfpsyp2_herm_01010_Statistics	24.09	syp-2het	SYP2GFP	2352780	97666.3
0.317542	0.0969306	EP	Herm	DLW197	2022_01_19_DLW197_gfpsyp2_herm_01010_Statistics	24.61	syp-2het	SYP2GFP	2483690	100922
0.299326	0.0728271	EP	Herm	DLW197	2022_01_19_DLW197_gfpsyp2_herm_01010_Statistics	22.78	syp-2het	SYP2GFP	2525890	110882
0.263035	0.0248048	EP	Herm	DLW197	2022_01_19_DLW197_gfpsyp2_herm_01010_Statistics	9.81	syp-2het	SYP2GFP	953402	97186.7
0.28478	0.053578	EP	Herm	DLW197	2022_01_19_DLW197_gfpsyp2_herm_01010_Statistics	19.33	syp-2het	SYP2GFP	2119430	109645
0.308176	0.0845369	EP	Herm	DLW197	2022_01_19_DLW197_gfpsyp2_herm_01010_Statistics	19.31	syp-2het	SYP2GFP	2213690	114640
0.34446	0.132551	EP	Herm	DLW197	2022_01_19_DLW197_gfpsyp2_herm_01010_Statistics	21.62	syp-2het	SYP2GFP	2230820	103183
0.287212	0.0567972	EP	Herm	DLW197	2022_01_19_DLW197_gfpsyp2_herm_01010_Statistics	21.75	syp-2het	SYP2GFP	2201790	101232
0.316988	0.0961983	EP	Herm	DLW197	2022_01_19_DLW197_gfpsyp2_herm_01010_Statistics	24.25	syp-2het	SYP2GFP	2739070	112951
0.330742	0.114399	EP	Herm	DLW197	2022_01_19_DLW197_gfpsyp2_herm_01010_Statistics	17.31	syp-2het	SYP2GFP	1992750	115121
0.363372	0.157576	EP	Herm	DLW197	2022_01_19_DLW197_gfpsyp2_herm_01010_Statistics	16.73	syp-2het	SYP2GFP	1740290	104022
0.309621	0.0864503	EP	Herm	DLW197	2022_01_19_DLW197_gfpsyp2_herm_01010_Statistics	19.06	syp-2het	SYP2GFP	2040490	107056
0.36625	0.161384	EP	Herm	DLW197	2022_01_19_DLW197_gfpsyp2_herm_01010_Statistics	18.4	syp-2het	SYP2GFP	2041240	110937
0.319901	0.100053	EP	Herm	DLW197	2022_01_19_DLW197_gfpsyp2_herm_01010_Statistics	18.45	syp-2het	SYP2GFP	2078430	112652
0.346507	0.13526	EP	Herm	DLW197	2022_01_19_DLW197_gfpsyp2_herm_01010_Statistics	24.65	syp-2het	SYP2GFP	2898220	117575
0.358625	0.151295	EP	Herm	DLW197	2022_01_19_DLW197_gfpsyp2_herm_01010_Statistics	21.85	syp-2het	SYP2GFP	2504850	114638
0.388248	0.190494	EP	Herm	DLW197	2022_01_19_DLW197_gfpsyp2_herm_01010_Statistics	21.22	syp-2het	SYP2GFP	2857900	134680
0.378804	0.177997	EP	Herm	DLW197	2022_01_19_DLW197_gfpsyp2_herm_01010_Statistics	27.35	syp-2het	SYP2GFP	3543110	129547
0.335391	0.12055	EP	Herm	DLW197	2022_01_19_DLW197_gfpsyp2_herm_01010_Statistics	21.95	syp-2het	SYP2GFP	2250930	102548
0.417577	0.229303	EP	Herm	DLW197	2022_01_19_DLW197_gfpsyp2_herm_01010_Statistics	32.93	syp-2het	SYP2GFP	4106550	124705
0.364474	0.159034	EP	Herm	DLW197	2022_01_19_DLW197_gfpsyp2_herm_01010_Statistics	24.22	syp-2het	SYP2GFP	3135420	129456
0.395607	0.200232	EP	Herm	DLW197	2022_01_19_DLW197_gfpsyp2_herm_01010_Statistics	30.56	syp-2het	SYP2GFP	3695150	120915
0.387856	0.189974	EP	Herm	DLW197	2022_01_19_DLW197_gfpsyp2_herm_01010_Statistics	24.03	syp-2het	SYP2GFP	2877470	119745
0.3903	0.193208	EP	Herm	DLW197	2022_01_19_DLW197_gfpsyp2_herm_01010_Statistics	26.53	syp-2het	SYP2GFP	3463460	130549
0.407844	0.216425	EP	Herm	DLW197	2022_01_19_DLW197_gfpsyp2_herm_01010_Statistics	29.69	syp-2het	SYP2GFP	3687170	124189
0.413534	0.223954	EP	Herm	DLW197	2022_01_19_DLW197_gfpsyp2_herm_01010_Statistics	26.99	syp-2het	SYP2GFP	3437900	127377
0.389712	0.192431	EP	Herm	DLW197	2022_01_19_DLW197_gfpsyp2_herm_01010_Statistics	20.21	syp-2het	SYP2GFP	2439990	120732
0.250765	0.00856752	EP	Herm	DLW197	2022_01_19_DLW197_gfpsyp2_herm_01010_Statistics	17.37	syp-2het	SYP2GFP	1677450	96571.7
0.43342	0.250268	EP	Herm	DLW197	2022_01_19_DLW197_gfpsyp2_herm_01010_Statistics	33.5	syp-2het	SYP2GFP	4226220	126156
0.419257	0.231527	EP	Herm	DLW197	2022_01_19_DLW197_gfpsyp2_herm_01010_Statistics	31.62	syp-2het	SYP2GFP	4343720	137373
0.425117	0.23928	EP	Herm	DLW197	2022_01_19_DLW197_gfpsyp2_herm_01010_Statistics	28.96	syp-2het	SYP2GFP	3660440	126396
0.435285	0.252735	EP	Herm	DLW197	2022_01_19_DLW197_gfpsyp2_herm_01010_Statistics	33.56	syp-2het	SYP2GFP	4178560	124510
0.45427	0.277858	EP	Herm	DLW197	2022_01_19_DLW197_gfpsyp2_herm_01010_Statistics	40.27	syp-2het	SYP2GFP	4940120	122675
0.445472	0.266216	EP	Herm	DLW197	2022_01_19_DLW197_gfpsyp2_herm_01010_Statistics	23.67	syp-2het	SYP2GFP	3125090	132027
0.469489	0.297996	EP	Herm	DLW197	2022_01_19_DLW197_gfpsyp2_herm_01010_Statistics	34.77	syp-2het	SYP2GFP	4553720	130967
0.432544	0.249108	EP	Herm	DLW197	2022_01_19_DLW197_gfpsyp2_herm_01010_Statistics	27	syp-2het	SYP2GFP	3353850	124217
0.454779	0.278531	EP	Herm	DLW197	2022_01_19_DLW197_gfpsyp2_herm_01010_Statistics	35.11	syp-2het	SYP2GFP	4479370	127581
0.482821	0.315638	EP	Herm	DLW197	2022_01_19_DLW197_gfpsyp2_herm_01010_Statistics	25.64	syp-2het	SYP2GFP	3651160	142401
0.450412	0.272752	EP	Herm	DLW197	2022_01_19_DLW197_gfpsyp2_herm_01010_Statistics	21.8	syp-2het	SYP2GFP	2542930	116648
0.482141	0.314739	EP	Herm	DLW197	2022_01_19_DLW197_gfpsyp2_herm_01010_Statistics	36.97	syp-2het	SYP2GFP	4836600	130825
0.464752	0.291728	EP	Herm	DLW197	2022_01_19_DLW197_gfpsyp2_herm_01010_Statistics	33.06	syp-2het	SYP2GFP	4420500	133711
0.497878	0.335563	MP	Herm	DLW197	2022_01_19_DLW197_gfpsyp2_herm_01010_Statistics	35	syp-2het	SYP2GFP	4565010	130429
0.470717	0.299621	EP	Herm	DLW197	2022_01_19_DLW197_gfpsyp2_herm_01010_Statistics	31.76	syp-2het	SYP2GFP	4338090	136590
0.474282	0.304339	EP	Herm	DLW197	2022_01_19_DLW197_gfpsyp2_herm_01010_Statistics	29.7	syp-2het	SYP2GFP	4117270	138629
0.493862	0.330248	EP	Herm	DLW197	2022_01_19_DLW197_gfpsyp2_herm_01010_Statistics	32.96	syp-2het	SYP2GFP	4643890	140895
0.482257	0.314892	EP	Herm	DLW197	2022_01_19_DLW197_gfpsyp2_herm_01010_Statistics	25.69	syp-2het	SYP2GFP	2960890	115255
0.508319	0.349378	MP	Herm	DLW197	2022_01_19_DLW197_gfpsyp2_herm_01010_Statistics	36	syp-2het	SYP2GFP	4816260	133785
0.499207	0.337321	MP	Herm	DLW197	2022_01_19_DLW197_gfpsyp2_herm_01010_Statistics	38.29	syp-2het	SYP2GFP	5229760	136583
0.5306	0.378863	MP	Herm	DLW197	2022_01_19_DLW197_gfpsyp2_herm_01010_Statistics	34.06	syp-2het	SYP2GFP	4634230	136061
0.492943	0.329032	EP	Herm	DLW197	2022_01_19_DLW197_gfpsyp2_herm_01010_Statistics	22.21	syp-2het	SYP2GFP	2909320	130991
0.538305	0.389058	MP	Herm	DLW197	2022_01_19_DLW197_gfpsyp2_herm_01010_Statistics	36.38	syp-2het	SYP2GFP	5128530	140971
0.523549	0.369532	MP	Herm	DLW197	2022_01_19_DLW197_gfpsyp2_herm_01010_Statistics	39.22	syp-2het	SYP2GFP	5660480	144326
0.516426	0.360107	MP	Herm	DLW197	2022_01_19_DLW197_gfpsyp2_herm_01010_Statistics	41.07	syp-2het	SYP2GFP	5128960	124883
0.53745	0.387927	MP	Herm	DLW197	2022_01_19_DLW197_gfpsyp2_herm_01010_Statistics	42.41	syp-2het	SYP2GFP	5715890	134777
0.547542	0.401281	MP	Herm	DLW197	2022_01_19_DLW197_gfpsyp2_herm_01010_Statistics	37.24	syp-2het	SYP2GFP	4675270	125544
0.561841	0.420202	MP	Herm	DLW197	2022_01_19_DLW197_gfpsyp2_herm_01010_Statistics	48.48	syp-2het	SYP2GFP	6382440	131651
0.592666	0.460991	MP	Herm	DLW197	2022_01_19_DLW197_gfpsyp2_herm_01010_Statistics	40.64	syp-2het	SYP2GFP	5781510	142262
0.564793	0.424108	MP	Herm	DLW197	2022_01_19_DLW197_gfpsyp2_herm_01010_Statistics	42.59	syp-2het	SYP2GFP	5803750	136270
0.553763	0.409513	MP	Herm	DLW197	2022_01_19_DLW197_gfpsyp2_herm_01010_Statistics	37.54	syp-2het	SYP2GFP	4996570	133100
0.580118	0.444388	MP	Herm	DLW197	2022_01_19_DLW197_gfpsyp2_herm_01010_Statistics	34.52	syp-2het	SYP2GFP	5366240	155453
0.583919	0.449417	MP	Herm	DLW197	2022_01_19_DLW197_gfpsyp2_herm_01010_Statistics	41.52	syp-2het	SYP2GFP	5611800	135159
0.571419	0.432876	MP	Herm	DLW197	2022_01_19_DLW197_gfpsyp2_herm_01010_Statistics	45.87	syp-2het	SYP2GFP	5916830	128991
0.625348	0.504238	MP	Herm	DLW197	2022_01_19_DLW197_gfpsyp2_herm_01010_Statistics	44.14	syp-2het	SYP2GFP	5799030	131378
0.603573	0.475424	MP	Herm	DLW197	2022_01_19_DLW197_gfpsyp2_herm_01010_Statistics	40.46	syp-2het	SYP2GFP	5658840	139863
0.596728	0.466366	MP	Herm	DLW197	2022_01_19_DLW197_gfpsyp2_herm_01010_Statistics	43.9	syp-2het	SYP2GFP	5979030	136197
0.598975	0.46934	MP	Herm	DLW197	2022_01_19_DLW197_gfpsyp2_herm_01010_Statistics	42.53	syp-2het	SYP2GFP	5667140	133250
0.610847	0.48505	MP	Herm	DLW197	2022_01_19_DLW197_gfpsyp2_herm_01010_Statistics	38.39	syp-2het	SYP2GFP	5768350	150257
0.630192	0.510648	MP	Herm	DLW197	2022_01_19_DLW197_gfpsyp2_herm_01010_Statistics	44.92	syp-2het	SYP2GFP	6305710	140376
0.65663	0.545632	MP	Herm	DLW197	2022_01_19_DLW197_gfpsyp2_herm_01010_Statistics	34.07	syp-2het	SYP2GFP	5351720	157080
0.634032	0.515729	MP	Herm	DLW197	2022_01_19_DLW197_gfpsyp2_herm_01010_Statistics	42.82	syp-2het	SYP2GFP	6373460	148843
0.659141	0.548955	MP	Herm	DLW197	2022_01_19_DLW197_gfpsyp2_herm_01010_Statistics	44.75	syp-2het	SYP2GFP	6093530	136168
0.626086	0.505215	MP	Herm	DLW197	2022_01_19_DLW197_gfpsyp2_herm_01010_Statistics	41.56	syp-2het	SYP2GFP	5555020	133663
0.664503	0.556051	MP	Herm	DLW197	2022_01_19_DLW197_gfpsyp2_herm_01010_Statistics	47.92	syp-2het	SYP2GFP	6852290	142994
0.650863	0.538001	MP	Herm	DLW197	2022_01_19_DLW197_gfpsyp2_herm_01010_Statistics	47.79	syp-2het	SYP2GFP	6672260	139616
0.662953	0.553999	MP	Herm	DLW197	2022_01_19_DLW197_gfpsyp2_herm_01010_Statistics	43.57	syp-2het	SYP2GFP	5652480	129733
0.657368	0.546609	MP	Herm	DLW197	2022_01_19_DLW197_gfpsyp2_herm_01010_Statistics	42.31	syp-2het	SYP2GFP	5675320	134137
0.676981	0.572562	MP	Herm	DLW197	2022_01_19_DLW197_gfpsyp2_herm_01010_Statistics	50.03	syp-2het	SYP2GFP	7006950	140055
0.686908	0.585698	MP	Herm	DLW197	2022_01_19_DLW197_gfpsyp2_herm_01010_Statistics	34.76	syp-2het	SYP2GFP	5416590	155828
0.708751	0.614602	MP	Herm	DLW197	2022_01_19_DLW197_gfpsyp2_herm_01010_Statistics	49.58	syp-2het	SYP2GFP	6258660	126234
0.690248	0.590118	MP	Herm	DLW197	2022_01_19_DLW197_gfpsyp2_herm_01010_Statistics	51.49	syp-2het	SYP2GFP	7728940	150106
0.706344	0.611417	MP	Herm	DLW197	2022_01_19_DLW197_gfpsyp2_herm_01010_Statistics	38.68	syp-2het	SYP2GFP	6263740	161937
0.697982	0.600352	MP	Herm	DLW197	2022_01_19_DLW197_gfpsyp2_herm_01010_Statistics	54.24	syp-2het	SYP2GFP	7494720	138177
0.714739	0.622526	MP	Herm	DLW197	2022_01_19_DLW197_gfpsyp2_herm_01010_Statistics	36.31	syp-2het	SYP2GFP	5088360	140137
0.719731	0.629131	MP	Herm	DLW197	2022_01_19_DLW197_gfpsyp2_herm_01010_Statistics	58.62	syp-2het	SYP2GFP	8320060	141932
0.730251	0.643052	MP	Herm	DLW197	2022_01_19_DLW197_gfpsyp2_herm_01010_Statistics	49.36	syp-2het	SYP2GFP	7103380	143910
0.743309	0.660331	MP	Herm	DLW197	2022_01_19_DLW197_gfpsyp2_herm_01010_Statistics	58.91	syp-2het	SYP2GFP	8515400	144549
0.75932	0.681518	LP	Herm	DLW197	2022_01_19_DLW197_gfpsyp2_herm_01010_Statistics	50.28	syp-2het	SYP2GFP	8190260	162893
0.777322	0.705339	LP	Herm	DLW197	2022_01_19_DLW197_gfpsyp2_herm_01010_Statistics	53.66	syp-2het	SYP2GFP	8986640	167474
0.754998	0.675798	LP	Herm	DLW197	2022_01_19_DLW197_gfpsyp2_herm_01010_Statistics	41.68	syp-2het	SYP2GFP	7099120	170324
0.808585	0.746708	LP	Herm	DLW197	2022_01_19_DLW197_gfpsyp2_herm_01010_Statistics	36.51	syp-2het	SYP2GFP	7106630	194649
0.76192	0.684959	LP	Herm	DLW197	2022_01_19_DLW197_gfpsyp2_herm_01010_Statistics	49.73	syp-2het	SYP2GFP	6764060	136016
0.786665	0.717702	LP	Herm	DLW197	2022_01_19_DLW197_gfpsyp2_herm_01010_Statistics	52.94	syp-2het	SYP2GFP	7736410	146135
0.793295	0.726476	LP	Herm	DLW197	2022_01_19_DLW197_gfpsyp2_herm_01010_Statistics	65.71	syp-2het	SYP2GFP	9380030	142749
0.820066	0.7619	LP	Herm	DLW197	2022_01_19_DLW197_gfpsyp2_herm_01010_Statistics	58.92	syp-2het	SYP2GFP	7738110	131332
0.805105	0.742104	LP	Herm	DLW197	2022_01_19_DLW197_gfpsyp2_herm_01010_Statistics	57.5	syp-2het	SYP2GFP	8123440	141277
[truncated: 7,562 more rows]
