# Supplementary material for: Sexual dimorphic regulation of recombination by the synaptonemal complex in C. elegans
Source: eLife. 2023 Oct 5;12:e84538. doi: 10.7554/eLife.84538 (PMC10611432; doi:10.7554/eLife.84538)
Supplement: Figure 8—source data 1. [file elife-84538-fig8-data1.xlsx]

## Sheet: Sheet1
nucleus_x_position	normalized_nucleus_position	meiosis_stage	Sex	Strain_number	image_name	Volume	Genotype	Protein	sum_intensity	sum_intensity_normalized_vol
0.0265714	-0.017892	TZ	Herm	DLW241	2023_04_05_DLW241_herm_01_Statistics	10.9	WT	SYP5GFP	793137	72764.9
0.181751	0.144376	EP	Herm	DLW241	2023_04_05_DLW241_herm_01_Statistics	17.56	WT	SYP5GFP	1294800	73735.8
0.168889	0.130927	EP	Herm	DLW241	2023_04_05_DLW241_herm_01_Statistics	11.63	WT	SYP5GFP	869145	74733
0.185963	0.14878	EP	Herm	DLW241	2023_04_05_DLW241_herm_01_Statistics	11.04	WT	SYP5GFP	862841	78155.9
0.0712183	0.0287943	EP	Herm	DLW241	2023_04_05_DLW241_herm_01_Statistics	11.4	WT	SYP5GFP	838089	73516.6
0.14061	0.101356	EP	Herm	DLW241	2023_04_05_DLW241_herm_01_Statistics	11.13	WT	SYP5GFP	870297	78193.8
0.167784	0.12977	EP	Herm	DLW241	2023_04_05_DLW241_herm_01_Statistics	12.38	WT	SYP5GFP	967775	78172.5
0.061259	0.0183801	EP	Herm	DLW241	2023_04_05_DLW241_herm_01_Statistics	11.09	WT	SYP5GFP	834424	75241.1
0.177669	0.140108	EP	Herm	DLW241	2023_04_05_DLW241_herm_01_Statistics	12.4	WT	SYP5GFP	969289	78168.5
0.102966	0.0619926	EP	Herm	DLW241	2023_04_05_DLW241_herm_01_Statistics	10.02	WT	SYP5GFP	715602	71417.4
0.0499445	0.00654881	EP	Herm	DLW241	2023_04_05_DLW241_herm_01_Statistics	10.92	WT	SYP5GFP	789879	72333.2
0.313306	0.28194	EP	Herm	DLW241	2023_04_05_DLW241_herm_01_Statistics	13.31	WT	SYP5GFP	1089790	81877.5
0.335618	0.305271	EP	Herm	DLW241	2023_04_05_DLW241_herm_01_Statistics	14.28	WT	SYP5GFP	1233440	86375.4
0.252346	0.218195	EP	Herm	DLW241	2023_04_05_DLW241_herm_01_Statistics	19.11	WT	SYP5GFP	1525090	79805.9
0.276891	0.243862	EP	Herm	DLW241	2023_04_05_DLW241_herm_01_Statistics	12.73	WT	SYP5GFP	1019630	80096.6
0.28755	0.255007	EP	Herm	DLW241	2023_04_05_DLW241_herm_01_Statistics	13.41	WT	SYP5GFP	1102820	82238.6
0.332808	0.302333	EP	Herm	DLW241	2023_04_05_DLW241_herm_01_Statistics	23.84	WT	SYP5GFP	2105230	88306.6
0.341992	0.311936	EP	Herm	DLW241	2023_04_05_DLW241_herm_01_Statistics	16.7	WT	SYP5GFP	1564490	93682
0.299806	0.267823	EP	Herm	DLW241	2023_04_05_DLW241_herm_01_Statistics	20.86	WT	SYP5GFP	1833100	87876.3
0.209862	0.173771	EP	Herm	DLW241	2023_04_05_DLW241_herm_01_Statistics	14.46	WT	SYP5GFP	1173040	81123.1
0.265774	0.232237	EP	Herm	DLW241	2023_04_05_DLW241_herm_01_Statistics	19.03	WT	SYP5GFP	1611000	84655.8
0.278791	0.245849	EP	Herm	DLW241	2023_04_05_DLW241_herm_01_Statistics	13.97	WT	SYP5GFP	1163980	83320
0.242992	0.208415	EP	Herm	DLW241	2023_04_05_DLW241_herm_01_Statistics	20.42	WT	SYP5GFP	1667090	81640.1
0.225528	0.190153	EP	Herm	DLW241	2023_04_05_DLW241_herm_01_Statistics	15.02	WT	SYP5GFP	1250540	83258.3
0.259553	0.225731	EP	Herm	DLW241	2023_04_05_DLW241_herm_01_Statistics	21.86	WT	SYP5GFP	1825540	83510.5
0.205414	0.16912	EP	Herm	DLW241	2023_04_05_DLW241_herm_01_Statistics	11.31	WT	SYP5GFP	862198	76233.2
0.295948	0.263789	EP	Herm	DLW241	2023_04_05_DLW241_herm_01_Statistics	20.91	WT	SYP5GFP	1780770	85163.6
0.219752	0.184112	EP	Herm	DLW241	2023_04_05_DLW241_herm_01_Statistics	12.34	WT	SYP5GFP	981939	79573.7
0.266772	0.23328	EP	Herm	DLW241	2023_04_05_DLW241_herm_01_Statistics	10.27	WT	SYP5GFP	811742	79040.1
0.193872	0.15705	EP	Herm	DLW241	2023_04_05_DLW241_herm_01_Statistics	11.97	WT	SYP5GFP	931907	77853.6
0.420702	0.394241	MP	Herm	DLW241	2023_04_05_DLW241_herm_01_Statistics	23.9	WT	SYP5GFP	2205670	92287.4
0.464142	0.439665	MP	Herm	DLW241	2023_04_05_DLW241_herm_01_Statistics	28.58	WT	SYP5GFP	2796790	97858.3
0.390096	0.362237	MP	Herm	DLW241	2023_04_05_DLW241_herm_01_Statistics	28.88	WT	SYP5GFP	2512760	87006.9
0.439653	0.414058	MP	Herm	DLW241	2023_04_05_DLW241_herm_01_Statistics	22.03	WT	SYP5GFP	2136460	96979.6
0.451655	0.426609	MP	Herm	DLW241	2023_04_05_DLW241_herm_01_Statistics	21.92	WT	SYP5GFP	2026720	92459.9
0.367065	0.338154	MP	Herm	DLW241	2023_04_05_DLW241_herm_01_Statistics	26.39	WT	SYP5GFP	2345230	88868.1
0.424325	0.398029	MP	Herm	DLW241	2023_04_05_DLW241_herm_01_Statistics	26.17	WT	SYP5GFP	2369470	90541.5
0.400809	0.37344	MP	Herm	DLW241	2023_04_05_DLW241_herm_01_Statistics	21.94	WT	SYP5GFP	1908810	87001.4
0.349934	0.320241	EP	Herm	DLW241	2023_04_05_DLW241_herm_01_Statistics	16.99	WT	SYP5GFP	1466000	86286.1
0.376465	0.347984	MP	Herm	DLW241	2023_04_05_DLW241_herm_01_Statistics	21.87	WT	SYP5GFP	1968870	90026.1
0.456391	0.431561	MP	Herm	DLW241	2023_04_05_DLW241_herm_01_Statistics	18.85	WT	SYP5GFP	1860330	98691.2
0.408158	0.381124	MP	Herm	DLW241	2023_04_05_DLW241_herm_01_Statistics	23.54	WT	SYP5GFP	2228030	94648.7
0.358591	0.329294	EP	Herm	DLW241	2023_04_05_DLW241_herm_01_Statistics	25.33	WT	SYP5GFP	2263250	89350.6
0.383331	0.355164	MP	Herm	DLW241	2023_04_05_DLW241_herm_01_Statistics	19.63	WT	SYP5GFP	1779910	90672.9
0.41606	0.389387	MP	Herm	DLW241	2023_04_05_DLW241_herm_01_Statistics	20.13	WT	SYP5GFP	1856400	92220.6
0.463976	0.439492	MP	Herm	DLW241	2023_04_05_DLW241_herm_01_Statistics	27.99	WT	SYP5GFP	2582160	92252.9
0.394994	0.367359	MP	Herm	DLW241	2023_04_05_DLW241_herm_01_Statistics	15.52	WT	SYP5GFP	1408650	90763.5
0.469859	0.445644	MP	Herm	DLW241	2023_04_05_DLW241_herm_01_Statistics	32.11	WT	SYP5GFP	2897500	90236.7
0.369566	0.34077	MP	Herm	DLW241	2023_04_05_DLW241_herm_01_Statistics	23.39	WT	SYP5GFP	2188770	93577.2
0.422685	0.396315	MP	Herm	DLW241	2023_04_05_DLW241_herm_01_Statistics	21.87	WT	SYP5GFP	2260990	103383
0.403139	0.375876	MP	Herm	DLW241	2023_04_05_DLW241_herm_01_Statistics	26.26	WT	SYP5GFP	2396150	91247.1
0.479339	0.455557	MP	Herm	DLW241	2023_04_05_DLW241_herm_01_Statistics	26.01	WT	SYP5GFP	2478540	95291.8
0.693655	0.679662	LP	Herm	DLW241	2023_04_05_DLW241_herm_01_Statistics	54.66	WT	SYP5GFP	6666370	121961
0.665981	0.650724	MP	Herm	DLW241	2023_04_05_DLW241_herm_01_Statistics	25.78	WT	SYP5GFP	3186770	123614
0.643866	0.627599	MP	Herm	DLW241	2023_04_05_DLW241_herm_01_Statistics	34.89	WT	SYP5GFP	3982540	114146
0.67324	0.658315	MP	Herm	DLW241	2023_04_05_DLW241_herm_01_Statistics	51.27	WT	SYP5GFP	6339950	123658
0.651016	0.635075	MP	Herm	DLW241	2023_04_05_DLW241_herm_01_Statistics	43.72	WT	SYP5GFP	4955040	113336
0.617819	0.600362	MP	Herm	DLW241	2023_04_05_DLW241_herm_01_Statistics	42.81	WT	SYP5GFP	4567570	106694
0.659238	0.643673	MP	Herm	DLW241	2023_04_05_DLW241_herm_01_Statistics	37.33	WT	SYP5GFP	4246250	113749
0.62833	0.611353	MP	Herm	DLW241	2023_04_05_DLW241_herm_01_Statistics	41.85	WT	SYP5GFP	4699070	112284
0.552554	0.532116	MP	Herm	DLW241	2023_04_05_DLW241_herm_01_Statistics	39.5	WT	SYP5GFP	4165940	105467
0.563675	0.543745	MP	Herm	DLW241	2023_04_05_DLW241_herm_01_Statistics	34.88	WT	SYP5GFP	3790550	108674
0.637979	0.621443	MP	Herm	DLW241	2023_04_05_DLW241_herm_01_Statistics	40.92	WT	SYP5GFP	4624130	113004
0.654219	0.638425	MP	Herm	DLW241	2023_04_05_DLW241_herm_01_Statistics	41.8	WT	SYP5GFP	4662700	111548
0.602056	0.583879	MP	Herm	DLW241	2023_04_05_DLW241_herm_01_Statistics	32.88	WT	SYP5GFP	3436730	104523
0.542403	0.521501	MP	Herm	DLW241	2023_04_05_DLW241_herm_01_Statistics	37.09	WT	SYP5GFP	3856400	103974
0.508034	0.485562	MP	Herm	DLW241	2023_04_05_DLW241_herm_01_Statistics	23	WT	SYP5GFP	2253230	97966.5
0.574279	0.554834	MP	Herm	DLW241	2023_04_05_DLW241_herm_01_Statistics	32.39	WT	SYP5GFP	3165610	97734.2
0.5234	0.50163	MP	Herm	DLW241	2023_04_05_DLW241_herm_01_Statistics	27.55	WT	SYP5GFP	2651870	96256.6
0.553947	0.533572	MP	Herm	DLW241	2023_04_05_DLW241_herm_01_Statistics	35.22	WT	SYP5GFP	3693600	104872
0.539686	0.518661	MP	Herm	DLW241	2023_04_05_DLW241_herm_01_Statistics	22.22	WT	SYP5GFP	2516190	113240
0.486097	0.462624	MP	Herm	DLW241	2023_04_05_DLW241_herm_01_Statistics	27.83	WT	SYP5GFP	2975490	106917
0.502309	0.479576	MP	Herm	DLW241	2023_04_05_DLW241_herm_01_Statistics	28.39	WT	SYP5GFP	3301000	116273
0.540581	0.519596	MP	Herm	DLW241	2023_04_05_DLW241_herm_01_Statistics	29.88	WT	SYP5GFP	2976810	99625.5
0.586173	0.567271	MP	Herm	DLW241	2023_04_05_DLW241_herm_01_Statistics	34.3	WT	SYP5GFP	3442540	100366
0.523748	0.501994	MP	Herm	DLW241	2023_04_05_DLW241_herm_01_Statistics	32.27	WT	SYP5GFP	3224990	99937.7
0.567087	0.547313	MP	Herm	DLW241	2023_04_05_DLW241_herm_01_Statistics	31.37	WT	SYP5GFP	3169140	101025
0.518782	0.496801	MP	Herm	DLW241	2023_04_05_DLW241_herm_01_Statistics	17.5	WT	SYP5GFP	1726140	98636.6
0.547347	0.526671	MP	Herm	DLW241	2023_04_05_DLW241_herm_01_Statistics	36.7	WT	SYP5GFP	3689340	100527
0.525973	0.504321	MP	Herm	DLW241	2023_04_05_DLW241_herm_01_Statistics	29.28	WT	SYP5GFP	2816640	96196.7
0.481682	0.458007	MP	Herm	DLW241	2023_04_05_DLW241_herm_01_Statistics	26.83	WT	SYP5GFP	2484790	92612.4
0.503007	0.480306	MP	Herm	DLW241	2023_04_05_DLW241_herm_01_Statistics	30.5	WT	SYP5GFP	3021030	99050.2
0.773552	0.763208	LP	Herm	DLW241	2023_04_05_DLW241_herm_01_Statistics	55.58	WT	SYP5GFP	7536860	135604
0.748942	0.737474	LP	Herm	DLW241	2023_04_05_DLW241_herm_01_Statistics	53.13	WT	SYP5GFP	7396660	139218
0.728012	0.715589	LP	Herm	DLW241	2023_04_05_DLW241_herm_01_Statistics	55.79	WT	SYP5GFP	7484350	134152
0.784159	0.7743	LP	Herm	DLW241	2023_04_05_DLW241_herm_01_Statistics	58.94	WT	SYP5GFP	8383150	142232
0.759791	0.748819	LP	Herm	DLW241	2023_04_05_DLW241_herm_01_Statistics	26.54	WT	SYP5GFP	3367840	126897
0.718493	0.705634	LP	Herm	DLW241	2023_04_05_DLW241_herm_01_Statistics	46.34	WT	SYP5GFP	5994770	129365
0.736221	0.724172	LP	Herm	DLW241	2023_04_05_DLW241_herm_01_Statistics	51.9	WT	SYP5GFP	6929430	133515
0.770149	0.75965	LP	Herm	DLW241	2023_04_05_DLW241_herm_01_Statistics	59.93	WT	SYP5GFP	8176940	136442
0.746308	0.73472	LP	Herm	DLW241	2023_04_05_DLW241_herm_01_Statistics	49.67	WT	SYP5GFP	6388110	128611
0.697363	0.68354	LP	Herm	DLW241	2023_04_05_DLW241_herm_01_Statistics	49.42	WT	SYP5GFP	6201130	125478
0.70094	0.687279	LP	Herm	DLW241	2023_04_05_DLW241_herm_01_Statistics	44.34	WT	SYP5GFP	5188930	117026
0.885055	0.879805	LP	Herm	DLW241	2023_04_05_DLW241_herm_01_Statistics	62.37	WT	SYP5GFP	8901960	142728
0.900411	0.895862	LP	Herm	DLW241	2023_04_05_DLW241_herm_01_Statistics	59.05	WT	SYP5GFP	8502350	143986
0.864546	0.858359	LP	Herm	DLW241	2023_04_05_DLW241_herm_01_Statistics	34.29	WT	SYP5GFP	5506080	160574
0.874904	0.86919	LP	Herm	DLW241	2023_04_05_DLW241_herm_01_Statistics	62.34	WT	SYP5GFP	8884250	142513
0.845094	0.838018	LP	Herm	DLW241	2023_04_05_DLW241_herm_01_Statistics	57.75	WT	SYP5GFP	8408950	145610
0.852674	0.845945	LP	Herm	DLW241	2023_04_05_DLW241_herm_01_Statistics	59.28	WT	SYP5GFP	8732550	147310
0.890883	0.885899	LP	Herm	DLW241	2023_04_05_DLW241_herm_01_Statistics	59.26	WT	SYP5GFP	8455600	142686
0.826312	0.818379	LP	Herm	DLW241	2023_04_05_DLW241_herm_01_Statistics	55.11	WT	SYP5GFP	8122720	147391
0.798841	0.789653	LP	Herm	DLW241	2023_04_05_DLW241_herm_01_Statistics	60.9	WT	SYP5GFP	8560310	140563
0.861663	0.855344	LP	Herm	DLW241	2023_04_05_DLW241_herm_01_Statistics	74.6	WT	SYP5GFP	13061200	175083
0.838658	0.831288	LP	Herm	DLW241	2023_04_05_DLW241_herm_01_Statistics	52.99	WT	SYP5GFP	7846430	148074
0.901699	0.897208	LP	Herm	DLW241	2023_04_05_DLW241_herm_01_Statistics	68.1	WT	SYP5GFP	8782810	128969
0.878508	0.872959	LP	Herm	DLW241	2023_04_05_DLW241_herm_01_Statistics	59.5	WT	SYP5GFP	8620570	144884
0.808784	0.800049	LP	Herm	DLW241	2023_04_05_DLW241_herm_01_Statistics	54.81	WT	SYP5GFP	8162380	148921
0.838656	0.831287	LP	Herm	DLW241	2023_04_05_DLW241_herm_01_Statistics	58.92	WT	SYP5GFP	8556120	145216
0.992396	0.992049	LP	Herm	DLW241	2023_04_05_DLW241_herm_01_Statistics	58.99	WT	SYP5GFP	8298870	140683
0.96805	0.96659	LP	Herm	DLW241	2023_04_05_DLW241_herm_01_Statistics	55.08	WT	SYP5GFP	7941280	144177
0.943425	0.94084	LP	Herm	DLW241	2023_04_05_DLW241_herm_01_Statistics	56.35	WT	SYP5GFP	8676390	153973
0.975382	0.974257	LP	Herm	DLW241	2023_04_05_DLW241_herm_01_Statistics	56.01	WT	SYP5GFP	7953280	141998
0.915111	0.911234	LP	Herm	DLW241	2023_04_05_DLW241_herm_01_Statistics	60.89	WT	SYP5GFP	8875530	145763
0.950446	0.948183	LP	Herm	DLW241	2023_04_05_DLW241_herm_01_Statistics	59.01	WT	SYP5GFP	8709100	147587
0.995785	0.995593	LP	Herm	DLW241	2023_04_05_DLW241_herm_01_Statistics	49.93	WT	SYP5GFP	7093140	142062
0.926316	0.92295	LP	Herm	DLW241	2023_04_05_DLW241_herm_01_Statistics	57.39	WT	SYP5GFP	8288990	144433
0.961126	0.959351	LP	Herm	DLW241	2023_04_05_DLW241_herm_01_Statistics	53.42	WT	SYP5GFP	7828080	146538
0.938363	0.935548	LP	Herm	DLW241	2023_04_05_DLW241_herm_01_Statistics	61.93	WT	SYP5GFP	7809460	126101
0.978667	0.977693	LP	Herm	DLW241	2023_04_05_DLW241_herm_01_Statistics	60.03	WT	SYP5GFP	8186130	136367
0.913777	0.909839	LP	Herm	DLW241	2023_04_05_DLW241_herm_01_Statistics	63.38	WT	SYP5GFP	8389350	132366
0.95336	0.951229	LP	Herm	DLW241	2023_04_05_DLW241_herm_01_Statistics	56.84	WT	SYP5GFP	7653120	134643
1	1	Dip/Diak	Herm	DLW241	2023_04_05_DLW241_herm_01_Statistics	51.51	WT	SYP5GFP	7480080	145216
1	1	LP	Herm	DLW241	2023_04_05_DLW241_herm_01_Statistics	57.13	WT	SYP5GFP	8046680	140849
1	1	LP	Herm	DLW241	2023_04_05_DLW241_herm_01_Statistics	59.79	WT	SYP5GFP	8537090	142785
0.149985	-0.0475986	TZ	Herm	DLW241	2023_04_05_DLW241_herm_01001_Statistics	10.85	WT	SYP5GFP	870314	80213.3
0.128062	-0.0746176	TZ	Herm	DLW241	2023_04_05_DLW241_herm_01001_Statistics	11.22	WT	SYP5GFP	902675	80452.3
0.203101	0.0178632	EP	Herm	DLW241	2023_04_05_DLW241_herm_01001_Statistics	11.47	WT	SYP5GFP	939007	81866.3
0.226908	0.0472051	EP	Herm	DLW241	2023_04_05_DLW241_herm_01001_Statistics	12.91	WT	SYP5GFP	1054810	81704.9
0.234316	0.0563343	EP	Herm	DLW241	2023_04_05_DLW241_herm_01001_Statistics	12.47	WT	SYP5GFP	1050680	84256.6
0.25772	0.085179	EP	Herm	DLW241	2023_04_05_DLW241_herm_01001_Statistics	10.65	WT	SYP5GFP	853898	80178.2
0.28031	0.11302	EP	Herm	DLW241	2023_04_05_DLW241_herm_01001_Statistics	13.64	WT	SYP5GFP	1184420	86834.3
0.276665	0.108528	EP	Herm	DLW241	2023_04_05_DLW241_herm_01001_Statistics	11.28	WT	SYP5GFP	918602	81436.3
0.327456	0.171125	EP	Herm	DLW241	2023_04_05_DLW241_herm_01001_Statistics	12.51	WT	SYP5GFP	1061960	84888.9
0.347347	0.195639	EP	Herm	DLW241	2023_04_05_DLW241_herm_01001_Statistics	17.8	WT	SYP5GFP	1612890	90611.8
0.297328	0.133994	EP	Herm	DLW241	2023_04_05_DLW241_herm_01001_Statistics	17.14	WT	SYP5GFP	1413420	82463.2
0.331789	0.176465	EP	Herm	DLW241	2023_04_05_DLW241_herm_01001_Statistics	16.17	WT	SYP5GFP	1425240	88141
0.322146	0.164581	EP	Herm	DLW241	2023_04_05_DLW241_herm_01001_Statistics	10.52	WT	SYP5GFP	867704	82481.4
0.33879	0.185093	EP	Herm	DLW241	2023_04_05_DLW241_herm_01001_Statistics	13.43	WT	SYP5GFP	1111620	82771.4
0.348649	0.197244	EP	Herm	DLW241	2023_04_05_DLW241_herm_01001_Statistics	16.43	WT	SYP5GFP	1427160	86863.1
0.38907	0.247061	EP	Herm	DLW241	2023_04_05_DLW241_herm_01001_Statistics	16.71	WT	SYP5GFP	1505230	90079.6
0.356748	0.207226	EP	Herm	DLW241	2023_04_05_DLW241_herm_01001_Statistics	17.4	WT	SYP5GFP	1510400	86804.6
0.381158	0.23731	EP	Herm	DLW241	2023_04_05_DLW241_herm_01001_Statistics	17.6	WT	SYP5GFP	1538110	87392.6
0.414087	0.277893	EP	Herm	DLW241	2023_04_05_DLW241_herm_01001_Statistics	17.42	WT	SYP5GFP	1615920	92762.3
0.434926	0.303576	EP	Herm	DLW241	2023_04_05_DLW241_herm_01001_Statistics	20.38	WT	SYP5GFP	1811030	88863.1
0.367223	0.220136	EP	Herm	DLW241	2023_04_05_DLW241_herm_01001_Statistics	20.68	WT	SYP5GFP	1868870	90370.9
0.429026	0.296305	EP	Herm	DLW241	2023_04_05_DLW241_herm_01001_Statistics	21.95	WT	SYP5GFP	2015820	91836.9
0.351584	0.200861	EP	Herm	DLW241	2023_04_05_DLW241_herm_01001_Statistics	17.81	WT	SYP5GFP	1585610	89029.2
0.449457	0.321485	EP	Herm	DLW241	2023_04_05_DLW241_herm_01001_Statistics	12.66	WT	SYP5GFP	1177820	93034.8
0.399276	0.259639	EP	Herm	DLW241	2023_04_05_DLW241_herm_01001_Statistics	18.66	WT	SYP5GFP	1765490	94613.6
0.481966	0.36155	MP	Herm	DLW241	2023_04_05_DLW241_herm_01001_Statistics	24.57	WT	SYP5GFP	2226950	90637
0.374097	0.228607	EP	Herm	DLW241	2023_04_05_DLW241_herm_01001_Statistics	17.07	WT	SYP5GFP	1560900	91441.1
0.445445	0.31654	EP	Herm	DLW241	2023_04_05_DLW241_herm_01001_Statistics	14.66	WT	SYP5GFP	1401850	95624.1
0.48547	0.365868	MP	Herm	DLW241	2023_04_05_DLW241_herm_01001_Statistics	11.21	WT	SYP5GFP	1033280	92174.8
0.418913	0.283841	EP	Herm	DLW241	2023_04_05_DLW241_herm_01001_Statistics	20.68	WT	SYP5GFP	2069290	100062
0.367744	0.220778	EP	Herm	DLW241	2023_04_05_DLW241_herm_01001_Statistics	12.29	WT	SYP5GFP	1101470	89623.3
0.437703	0.306998	EP	Herm	DLW241	2023_04_05_DLW241_herm_01001_Statistics	16.85	WT	SYP5GFP	1584030	94007.7
0.394075	0.253229	EP	Herm	DLW241	2023_04_05_DLW241_herm_01001_Statistics	17.78	WT	SYP5GFP	1624250	91352.6
0.458728	0.332911	EP	Herm	DLW241	2023_04_05_DLW241_herm_01001_Statistics	18.9	WT	SYP5GFP	1852280	98004.2
0.365896	0.2185	EP	Herm	DLW241	2023_04_05_DLW241_herm_01001_Statistics	16.93	WT	SYP5GFP	1427660	84327.2
0.447825	0.319473	EP	Herm	DLW241	2023_04_05_DLW241_herm_01001_Statistics	13.74	WT	SYP5GFP	1293550	94144.8
0.476612	0.354952	MP	Herm	DLW241	2023_04_05_DLW241_herm_01001_Statistics	18.24	WT	SYP5GFP	1796360	98484.6
0.462333	0.337354	MP	Herm	DLW241	2023_04_05_DLW241_herm_01001_Statistics	18.13	WT	SYP5GFP	1745330	96267.5
0.453541	0.326518	EP	Herm	DLW241	2023_04_05_DLW241_herm_01001_Statistics	12.91	WT	SYP5GFP	1196260	92661.5
0.47583	0.353988	MP	Herm	DLW241	2023_04_05_DLW241_herm_01001_Statistics	18.59	WT	SYP5GFP	1709870	91977.9
0.504611	0.389459	MP	Herm	DLW241	2023_04_05_DLW241_herm_01001_Statistics	15.25	WT	SYP5GFP	1354380	88811.8
0.522767	0.411835	MP	Herm	DLW241	2023_04_05_DLW241_herm_01001_Statistics	22.76	WT	SYP5GFP	2225700	97790
0.543884	0.43786	MP	Herm	DLW241	2023_04_05_DLW241_herm_01001_Statistics	26.05	WT	SYP5GFP	2461660	94497.5
0.508922	0.394772	MP	Herm	DLW241	2023_04_05_DLW241_herm_01001_Statistics	20.55	WT	SYP5GFP	1952480	95011.2
0.597772	0.504276	MP	Herm	DLW241	2023_04_05_DLW241_herm_01001_Statistics	30.11	WT	SYP5GFP	2980860	98999
0.536801	0.429132	MP	Herm	DLW241	2023_04_05_DLW241_herm_01001_Statistics	23.45	WT	SYP5GFP	2509370	107009
0.556459	0.453358	MP	Herm	DLW241	2023_04_05_DLW241_herm_01001_Statistics	25.3	WT	SYP5GFP	2712910	107230
0.596745	0.503009	MP	Herm	DLW241	2023_04_05_DLW241_herm_01001_Statistics	30.16	WT	SYP5GFP	3385130	112239
0.511608	0.398083	MP	Herm	DLW241	2023_04_05_DLW241_herm_01001_Statistics	40.56	WT	SYP5GFP	4028640	99325.4
0.552857	0.44892	MP	Herm	DLW241	2023_04_05_DLW241_herm_01001_Statistics	23.88	WT	SYP5GFP	2329620	97555.3
0.531401	0.422477	MP	Herm	DLW241	2023_04_05_DLW241_herm_01001_Statistics	49.08	WT	SYP5GFP	5215240	106260
0.49658	0.379561	MP	Herm	DLW241	2023_04_05_DLW241_herm_01001_Statistics	13.45	WT	SYP5GFP	1296600	96401.5
0.614644	0.525068	MP	Herm	DLW241	2023_04_05_DLW241_herm_01001_Statistics	63.29	WT	SYP5GFP	7315290	115584
0.597401	0.503817	MP	Herm	DLW241	2023_04_05_DLW241_herm_01001_Statistics	25.26	WT	SYP5GFP	2935020	116192
0.535601	0.427653	MP	Herm	DLW241	2023_04_05_DLW241_herm_01001_Statistics	21.87	WT	SYP5GFP	2363810	108085
0.516584	0.404215	MP	Herm	DLW241	2023_04_05_DLW241_herm_01001_Statistics	21.51	WT	SYP5GFP	2055590	95564.4
0.556922	0.453929	MP	Herm	DLW241	2023_04_05_DLW241_herm_01001_Statistics	21.24	WT	SYP5GFP	2180610	102665
0.492177	0.374135	MP	Herm	DLW241	2023_04_05_DLW241_herm_01001_Statistics	16.27	WT	SYP5GFP	1576530	96898
0.635359	0.550599	MP	Herm	DLW241	2023_04_05_DLW241_herm_01001_Statistics	34.67	WT	SYP5GFP	3876410	111809
0.59585	0.501907	MP	Herm	DLW241	2023_04_05_DLW241_herm_01001_Statistics	28.05	WT	SYP5GFP	3293820	117427
0.615898	0.526615	MP	Herm	DLW241	2023_04_05_DLW241_herm_01001_Statistics	30.05	WT	SYP5GFP	3345820	111342
0.576535	0.478102	MP	Herm	DLW241	2023_04_05_DLW241_herm_01001_Statistics	23.92	WT	SYP5GFP	2582250	107954
0.503312	0.387858	MP	Herm	DLW241	2023_04_05_DLW241_herm_01001_Statistics	14.65	WT	SYP5GFP	1396180	95302.4
0.538474	0.431193	MP	Herm	DLW241	2023_04_05_DLW241_herm_01001_Statistics	20.33	WT	SYP5GFP	2115210	104044
0.521256	0.409973	MP	Herm	DLW241	2023_04_05_DLW241_herm_01001_Statistics	23.15	WT	SYP5GFP	2337840	100987
0.555774	0.452514	MP	Herm	DLW241	2023_04_05_DLW241_herm_01001_Statistics	21	WT	SYP5GFP	2135190	101676
0.505223	0.390213	MP	Herm	DLW241	2023_04_05_DLW241_herm_01001_Statistics	22.8	WT	SYP5GFP	2214380	97121.9
0.634187	0.549155	MP	Herm	DLW241	2023_04_05_DLW241_herm_01001_Statistics	33.37	WT	SYP5GFP	3620300	108490
0.539774	0.432796	MP	Herm	DLW241	2023_04_05_DLW241_herm_01001_Statistics	23.87	WT	SYP5GFP	2511870	105231
0.555562	0.452253	MP	Herm	DLW241	2023_04_05_DLW241_herm_01001_Statistics	22.74	WT	SYP5GFP	2416870	106283
0.55743	0.454555	MP	Herm	DLW241	2023_04_05_DLW241_herm_01001_Statistics	15.84	WT	SYP5GFP	1553850	98096.6
0.630347	0.544422	MP	Herm	DLW241	2023_04_05_DLW241_herm_01001_Statistics	20.55	WT	SYP5GFP	2181000	106131
0.57364	0.474533	MP	Herm	DLW241	2023_04_05_DLW241_herm_01001_Statistics	18.86	WT	SYP5GFP	1895410	100499
0.543456	0.437333	MP	Herm	DLW241	2023_04_05_DLW241_herm_01001_Statistics	23.92	WT	SYP5GFP	2323710	97145.1
0.6204	0.532163	MP	Herm	DLW241	2023_04_05_DLW241_herm_01001_Statistics	30.7	WT	SYP5GFP	3285230	107011
0.638548	0.55453	MP	Herm	DLW241	2023_04_05_DLW241_herm_01001_Statistics	33.7	WT	SYP5GFP	3738620	110938
0.592601	0.497902	MP	Herm	DLW241	2023_04_05_DLW241_herm_01001_Statistics	23.78	WT	SYP5GFP	2226830	93643
0.625349	0.538262	MP	Herm	DLW241	2023_04_05_DLW241_herm_01001_Statistics	32.95	WT	SYP5GFP	3465130	105163
0.593814	0.499398	MP	Herm	DLW241	2023_04_05_DLW241_herm_01001_Statistics	29.02	WT	SYP5GFP	3075140	105966
0.605527	0.513833	MP	Herm	DLW241	2023_04_05_DLW241_herm_01001_Statistics	21.02	WT	SYP5GFP	2152200	102388
0.575038	0.476256	MP	Herm	DLW241	2023_04_05_DLW241_herm_01001_Statistics	25.56	WT	SYP5GFP	2991370	117033
0.574531	0.475631	MP	Herm	DLW241	2023_04_05_DLW241_herm_01001_Statistics	30.46	WT	SYP5GFP	3309180	108640
0.647219	0.565216	MP	Herm	DLW241	2023_04_05_DLW241_herm_01001_Statistics	25.95	WT	SYP5GFP	2795930	107743
0.675762	0.600393	MP	Herm	DLW241	2023_04_05_DLW241_herm_01001_Statistics	34.74	WT	SYP5GFP	4025650	115879
0.7013	0.631868	MP	Herm	DLW241	2023_04_05_DLW241_herm_01001_Statistics	39.56	WT	SYP5GFP	4916030	124268
0.765961	0.711559	LP	Herm	DLW241	2023_04_05_DLW241_herm_01001_Statistics	43.94	WT	SYP5GFP	5654330	128683
0.691224	0.61945	MP	Herm	DLW241	2023_04_05_DLW241_herm_01001_Statistics	37.31	WT	SYP5GFP	4617720	123766
0.753799	0.69657	LP	Herm	DLW241	2023_04_05_DLW241_herm_01001_Statistics	58.09	WT	SYP5GFP	8240480	141857
0.733497	0.67155	LP	Herm	DLW241	2023_04_05_DLW241_herm_01001_Statistics	30.73	WT	SYP5GFP	3960440	128879
0.713717	0.647171	MP	Herm	DLW241	2023_04_05_DLW241_herm_01001_Statistics	41.28	WT	SYP5GFP	5291340	128182
0.682974	0.609283	MP	Herm	DLW241	2023_04_05_DLW241_herm_01001_Statistics	31.53	WT	SYP5GFP	3724600	118129
0.770226	0.716815	LP	Herm	DLW241	2023_04_05_DLW241_herm_01001_Statistics	24.4	WT	SYP5GFP	3068120	125743
0.744535	0.685153	LP	Herm	DLW241	2023_04_05_DLW241_herm_01001_Statistics	24.84	WT	SYP5GFP	3251590	130901
0.724893	0.660945	MP	Herm	DLW241	2023_04_05_DLW241_herm_01001_Statistics	47.51	WT	SYP5GFP	6517010	137171
0.662762	0.584372	MP	Herm	DLW241	2023_04_05_DLW241_herm_01001_Statistics	25.16	WT	SYP5GFP	3144650	124986
0.703287	0.634316	MP	Herm	DLW241	2023_04_05_DLW241_herm_01001_Statistics	35.66	WT	SYP5GFP	4625360	129707
0.685816	0.612785	MP	Herm	DLW241	2023_04_05_DLW241_herm_01001_Statistics	39.49	WT	SYP5GFP	4707520	119208
0.706793	0.638637	MP	Herm	DLW241	2023_04_05_DLW241_herm_01001_Statistics	40.76	WT	SYP5GFP	4997370	122605
0.741745	0.681714	LP	Herm	DLW241	2023_04_05_DLW241_herm_01001_Statistics	34.71	WT	SYP5GFP	4612440	132885
0.672286	0.596109	MP	Herm	DLW241	2023_04_05_DLW241_herm_01001_Statistics	27.2	WT	SYP5GFP	3008470	110606
0.649073	0.567501	MP	Herm	DLW241	2023_04_05_DLW241_herm_01001_Statistics	37.19	WT	SYP5GFP	4181870	112446
0.763948	0.709078	LP	Herm	DLW241	2023_04_05_DLW241_herm_01001_Statistics	36.98	WT	SYP5GFP	4936500	133491
0.693004	0.621644	MP	Herm	DLW241	2023_04_05_DLW241_herm_01001_Statistics	20.65	WT	SYP5GFP	2488100	120489
0.714154	0.647709	MP	Herm	DLW241	2023_04_05_DLW241_herm_01001_Statistics	35.63	WT	SYP5GFP	4296710	120592
0.740027	0.679597	LP	Herm	DLW241	2023_04_05_DLW241_herm_01001_Statistics	24.92	WT	SYP5GFP	3460070	138847
0.679364	0.604833	MP	Herm	DLW241	2023_04_05_DLW241_herm_01001_Statistics	28.19	WT	SYP5GFP	3426320	121544
0.654642	0.574364	MP	Herm	DLW241	2023_04_05_DLW241_herm_01001_Statistics	20.56	WT	SYP5GFP	2448620	119096
0.727758	0.664476	MP	Herm	DLW241	2023_04_05_DLW241_herm_01001_Statistics	48.38	WT	SYP5GFP	6445170	133220
0.75532	0.698444	LP	Herm	DLW241	2023_04_05_DLW241_herm_01001_Statistics	48.84	WT	SYP5GFP	6553310	134179
0.707216	0.639159	MP	Herm	DLW241	2023_04_05_DLW241_herm_01001_Statistics	39.8	WT	SYP5GFP	4897160	123044
0.772825	0.720018	LP	Herm	DLW241	2023_04_05_DLW241_herm_01001_Statistics	33.49	WT	SYP5GFP	4748780	141797
0.684428	0.611074	MP	Herm	DLW241	2023_04_05_DLW241_herm_01001_Statistics	35.73	WT	SYP5GFP	4251900	119001
0.744929	0.685638	LP	Herm	DLW241	2023_04_05_DLW241_herm_01001_Statistics	28.84	WT	SYP5GFP	3391420	117594
0.655641	0.575596	MP	Herm	DLW241	2023_04_05_DLW241_herm_01001_Statistics	31.83	WT	SYP5GFP	3469950	109015
0.832074	0.79304	LP	Herm	DLW241	2023_04_05_DLW241_herm_01001_Statistics	54.26	WT	SYP5GFP	7578660	139673
0.882256	0.854886	LP	Herm	DLW241	2023_04_05_DLW241_herm_01001_Statistics	34.62	WT	SYP5GFP	6029900	174174
0.902168	0.879428	LP	Herm	DLW241	2023_04_05_DLW241_herm_01001_Statistics	30.79	WT	SYP5GFP	5660250	183834
0.856052	0.822591	LP	Herm	DLW241	2023_04_05_DLW241_herm_01001_Statistics	67.76	WT	SYP5GFP	9961680	147014
0.781304	0.730469	LP	Herm	DLW241	2023_04_05_DLW241_herm_01001_Statistics	42.31	WT	SYP5GFP	5923340	139999
0.827948	0.787955	LP	Herm	DLW241	2023_04_05_DLW241_herm_01001_Statistics	55.49	WT	SYP5GFP	8332390	150160
0.955927	0.945682	LP	Herm	DLW241	2023_04_05_DLW241_herm_01001_Statistics	60.96	WT	SYP5GFP	8990560	147483
0.987947	0.985145	LP	Herm	DLW241	2023_04_05_DLW241_herm_01001_Statistics	60.44	WT	SYP5GFP	8273070	136881
0.924488	0.906935	LP	Herm	DLW241	2023_04_05_DLW241_herm_01001_Statistics	57.42	WT	SYP5GFP	8475940	147613
0.898261	0.874612	LP	Herm	DLW241	2023_04_05_DLW241_herm_01001_Statistics	55.98	WT	SYP5GFP	7856950	140353
0.871905	0.84213	LP	Herm	DLW241	2023_04_05_DLW241_herm_01001_Statistics	57.69	WT	SYP5GFP	8697040	150755
0.79389	0.745981	LP	Herm	DLW241	2023_04_05_DLW241_herm_01001_Statistics	48.74	WT	SYP5GFP	7572700	155369
0.939189	0.925054	LP	Herm	DLW241	2023_04_05_DLW241_herm_01001_Statistics	56.52	WT	SYP5GFP	8813780	155941
0.91289	0.892642	LP	Herm	DLW241	2023_04_05_DLW241_herm_01001_Statistics	51.77	WT	SYP5GFP	7676260	148276
0.810534	0.766493	LP	Herm	DLW241	2023_04_05_DLW241_herm_01001_Statistics	54.22	WT	SYP5GFP	7891190	145540
0.849758	0.814835	LP	Herm	DLW241	2023_04_05_DLW241_herm_01001_Statistics	62.55	WT	SYP5GFP	9456470	151183
0.7875	0.738105	LP	Herm	DLW241	2023_04_05_DLW241_herm_01001_Statistics	51.46	WT	SYP5GFP	7406280	143923
0.827897	0.787892	LP	Herm	DLW241	2023_04_05_DLW241_herm_01001_Statistics	56.06	WT	SYP5GFP	8717670	155506
0.985638	0.982299	LP	Herm	DLW241	2023_04_05_DLW241_herm_01001_Statistics	52.67	WT	SYP5GFP	7160520	135951
0.961607	0.952683	LP	Herm	DLW241	2023_04_05_DLW241_herm_01001_Statistics	54.49	WT	SYP5GFP	7864610	144331
0.887871	0.861807	LP	Herm	DLW241	2023_04_05_DLW241_herm_01001_Statistics	54.97	WT	SYP5GFP	8447150	153668
0.942056	0.928588	LP	Herm	DLW241	2023_04_05_DLW241_herm_01001_Statistics	50.74	WT	SYP5GFP	8002560	157717
0.864428	0.832915	LP	Herm	DLW241	2023_04_05_DLW241_herm_01001_Statistics	58.11	WT	SYP5GFP	8696240	149651
0.920639	0.902192	LP	Herm	DLW241	2023_04_05_DLW241_herm_01001_Statistics	58.31	WT	SYP5GFP	8874560	152196
0.974002	0.967959	LP	Herm	DLW241	2023_04_05_DLW241_herm_01001_Statistics	46.8	WT	SYP5GFP	6576630	140526
0.837475	0.799696	LP	Herm	DLW241	2023_04_05_DLW241_herm_01001_Statistics	36.19	WT	SYP5GFP	5667290	156598
0.80424	0.758736	LP	Herm	DLW241	2023_04_05_DLW241_herm_01001_Statistics	51.87	WT	SYP5GFP	7467680	143969
0.954293	0.943668	LP	Herm	DLW241	2023_04_05_DLW241_herm_01001_Statistics	52.85	WT	SYP5GFP	7754390	146725
0.899115	0.875665	LP	Herm	DLW241	2023_04_05_DLW241_herm_01001_Statistics	53.33	WT	SYP5GFP	8207250	153896
0.816754	0.774159	LP	Herm	DLW241	2023_04_05_DLW241_herm_01001_Statistics	51.44	WT	SYP5GFP	7245920	140862
0.876378	0.847642	LP	Herm	DLW241	2023_04_05_DLW241_herm_01001_Statistics	54.95	WT	SYP5GFP	8278250	150651
0.827123	0.786938	LP	Herm	DLW241	2023_04_05_DLW241_herm_01001_Statistics	51.42	WT	SYP5GFP	7590890	147625
0.853225	0.819107	LP	Herm	DLW241	2023_04_05_DLW241_herm_01001_Statistics	58.63	WT	SYP5GFP	8763440	149470
0.886065	0.859581	LP	Herm	DLW241	2023_04_05_DLW241_herm_01001_Statistics	50.53	WT	SYP5GFP	7897680	156297
1	1	LP	Herm	DLW241	2023_04_05_DLW241_herm_01001_Statistics	46.45	WT	SYP5GFP	6716910	144605
0.3272	0.241187	EP	Herm	DLW241	2023_04_05_DLW241_herm_01002_Statistics	17.73	WT	SYP5GFP	1364120	76938.5
0.273206	0.180291	EP	Herm	DLW241	2023_04_05_DLW241_herm_01002_Statistics	11.39	WT	SYP5GFP	892196	78331.5
0.375326	0.295466	EP	Herm	DLW241	2023_04_05_DLW241_herm_01002_Statistics	8.4	WT	SYP5GFP	705925	84038.7
0.304572	0.215666	EP	Herm	DLW241	2023_04_05_DLW241_herm_01002_Statistics	17.2	WT	SYP5GFP	1348000	78372.1
0.256416	0.161353	EP	Herm	DLW241	2023_04_05_DLW241_herm_01002_Statistics	11.37	WT	SYP5GFP	822875	72372.5
0.391902	0.314161	EP	Herm	DLW241	2023_04_05_DLW241_herm_01002_Statistics	20.44	WT	SYP5GFP	1741750	85212.8
0.319798	0.232839	EP	Herm	DLW241	2023_04_05_DLW241_herm_01002_Statistics	19.63	WT	SYP5GFP	1568820	79919.5
0.200451	0.0982338	EP	Herm	DLW241	2023_04_05_DLW241_herm_01002_Statistics	13.47	WT	SYP5GFP	921413	68404.8
0.375577	0.295749	EP	Herm	DLW241	2023_04_05_DLW241_herm_01002_Statistics	24.73	WT	SYP5GFP	2151600	87003.6
0.225879	0.126913	EP	Herm	DLW241	2023_04_05_DLW241_herm_01002_Statistics	16.96	WT	SYP5GFP	1265640	74625
0.245322	0.148841	EP	Herm	DLW241	2023_04_05_DLW241_herm_01002_Statistics	11.03	WT	SYP5GFP	886295	80353.1
0.393484	0.315945	EP	Herm	DLW241	2023_04_05_DLW241_herm_01002_Statistics	26.54	WT	SYP5GFP	2104620	79299.9
0.298964	0.209341	EP	Herm	DLW241	2023_04_05_DLW241_herm_01002_Statistics	18.09	WT	SYP5GFP	1493470	82557.8
0.35657	0.274312	EP	Herm	DLW241	2023_04_05_DLW241_herm_01002_Statistics	26.01	WT	SYP5GFP	2305300	88631.3
0.280382	0.188384	EP	Herm	DLW241	2023_04_05_DLW241_herm_01002_Statistics	9.17	WT	SYP5GFP	701352	76483.3
0.371463	0.291108	EP	Herm	DLW241	2023_04_05_DLW241_herm_01002_Statistics	23.08	WT	SYP5GFP	2017740	87423.7
0.332479	0.24714	EP	Herm	DLW241	2023_04_05_DLW241_herm_01002_Statistics	18.31	WT	SYP5GFP	1405390	76755.3
0.189668	0.0860726	EP	Herm	DLW241	2023_04_05_DLW241_herm_01002_Statistics	10.51	WT	SYP5GFP	775565	73793.1
0.230344	0.131949	EP	Herm	DLW241	2023_04_05_DLW241_herm_01002_Statistics	18.96	WT	SYP5GFP	1448060	76374.5
0.393994	0.31652	EP	Herm	DLW241	2023_04_05_DLW241_herm_01002_Statistics	27.94	WT	SYP5GFP	2430560	86992.1
0.308625	0.220237	EP	Herm	DLW241	2023_04_05_DLW241_herm_01002_Statistics	14.94	WT	SYP5GFP	1277540	85511.4
0.208908	0.107772	EP	Herm	DLW241	2023_04_05_DLW241_herm_01002_Statistics	10.21	WT	SYP5GFP	790426	77416.8
0.287208	0.196082	EP	Herm	DLW241	2023_04_05_DLW241_herm_01002_Statistics	11.45	WT	SYP5GFP	912401	79685.7
0.352181	0.269361	EP	Herm	DLW241	2023_04_05_DLW241_herm_01002_Statistics	27.94	WT	SYP5GFP	2268620	81196.1
0.263861	0.169751	EP	Herm	DLW241	2023_04_05_DLW241_herm_01002_Statistics	9.62	WT	SYP5GFP	720073	74851.7
0.189759	0.086175	EP	Herm	DLW241	2023_04_05_DLW241_herm_01002_Statistics	11.31	WT	SYP5GFP	845516	74758.3
0.253593	0.158169	EP	Herm	DLW241	2023_04_05_DLW241_herm_01002_Statistics	15.28	WT	SYP5GFP	1141320	74693.7
0.189212	0.0855584	EP	Herm	DLW241	2023_04_05_DLW241_herm_01002_Statistics	9.4	WT	SYP5GFP	692714	73693
0.154173	0.0460399	EP	Herm	DLW241	2023_04_05_DLW241_herm_01002_Statistics	10.18	WT	SYP5GFP	745666	73248.1
0.689774	0.650114	MP	Herm	DLW241	2023_04_05_DLW241_herm_01002_Statistics	22.73	WT	SYP5GFP	2434640	107111
0.668332	0.62593	MP	Herm	DLW241	2023_04_05_DLW241_herm_01002_Statistics	40.4	WT	SYP5GFP	4824830	119426
0.703557	0.665659	MP	Herm	DLW241	2023_04_05_DLW241_herm_01002_Statistics	37.32	WT	SYP5GFP	4526790	121297
0.589481	0.536999	MP	Herm	DLW241	2023_04_05_DLW241_herm_01002_Statistics	31.99	WT	SYP5GFP	2979720	93145.4
0.543728	0.485397	MP	Herm	DLW241	2023_04_05_DLW241_herm_01002_Statistics	31.23	WT	SYP5GFP	2966650	94993.6
0.568182	0.512977	MP	Herm	DLW241	2023_04_05_DLW241_herm_01002_Statistics	29.24	WT	SYP5GFP	2724660	93182.6
0.520185	0.458843	MP	Herm	DLW241	2023_04_05_DLW241_herm_01002_Statistics	24.13	WT	SYP5GFP	2145960	88933.3
0.578269	0.524354	MP	Herm	DLW241	2023_04_05_DLW241_herm_01002_Statistics	20.45	WT	SYP5GFP	2111840	103268
0.62724	0.579585	MP	Herm	DLW241	2023_04_05_DLW241_herm_01002_Statistics	38.78	WT	SYP5GFP	4221360	108854
0.68859	0.648778	MP	Herm	DLW241	2023_04_05_DLW241_herm_01002_Statistics	55.65	WT	SYP5GFP	7244960	130188
0.457081	0.387672	MP	Herm	DLW241	2023_04_05_DLW241_herm_01002_Statistics	26.62	WT	SYP5GFP	2196210	82502.3
0.661566	0.6183	MP	Herm	DLW241	2023_04_05_DLW241_herm_01002_Statistics	37.44	WT	SYP5GFP	4146790	110758
0.43485	0.3626	MP	Herm	DLW241	2023_04_05_DLW241_herm_01002_Statistics	24.38	WT	SYP5GFP	1836270	75318.7
0.601328	0.550361	MP	Herm	DLW241	2023_04_05_DLW241_herm_01002_Statistics	44.99	WT	SYP5GFP	4804290	106786
0.502106	0.438453	MP	Herm	DLW241	2023_04_05_DLW241_herm_01002_Statistics	25.42	WT	SYP5GFP	2213410	87073.6
0.555938	0.499167	MP	Herm	DLW241	2023_04_05_DLW241_herm_01002_Statistics	30.41	WT	SYP5GFP	2951890	97069.7
0.69447	0.65541	MP	Herm	DLW241	2023_04_05_DLW241_herm_01002_Statistics	25.11	WT	SYP5GFP	3034100	120832
0.635776	0.589213	MP	Herm	DLW241	2023_04_05_DLW241_herm_01002_Statistics	46.4	WT	SYP5GFP	5317500	114601
0.535278	0.475867	MP	Herm	DLW241	2023_04_05_DLW241_herm_01002_Statistics	33.74	WT	SYP5GFP	3350670	99308.5
0.570319	0.515387	MP	Herm	DLW241	2023_04_05_DLW241_herm_01002_Statistics	22.24	WT	SYP5GFP	2123690	95489.7
0.472967	0.405589	MP	Herm	DLW241	2023_04_05_DLW241_herm_01002_Statistics	20.63	WT	SYP5GFP	1901180	92156.1
0.407777	0.332065	EP	Herm	DLW241	2023_04_05_DLW241_herm_01002_Statistics	20.69	WT	SYP5GFP	1662240	80340.3
0.447882	0.377297	MP	Herm	DLW241	2023_04_05_DLW241_herm_01002_Statistics	31.1	WT	SYP5GFP	2655990	85401.6
0.58819	0.535543	MP	Herm	DLW241	2023_04_05_DLW241_herm_01002_Statistics	21.74	WT	SYP5GFP	2135480	98228.2
0.670934	0.628865	MP	Herm	DLW241	2023_04_05_DLW241_herm_01002_Statistics	51.69	WT	SYP5GFP	6556530	126843
0.644558	0.599117	MP	Herm	DLW241	2023_04_05_DLW241_herm_01002_Statistics	52.74	WT	SYP5GFP	6369750	120776
0.687478	0.647524	MP	Herm	DLW241	2023_04_05_DLW241_herm_01002_Statistics	47.74	WT	SYP5GFP	5513640	115493
0.548097	0.490324	MP	Herm	DLW241	2023_04_05_DLW241_herm_01002_Statistics	33.75	WT	SYP5GFP	3194590	94654.5
0.428209	0.355109	MP	Herm	DLW241	2023_04_05_DLW241_herm_01002_Statistics	17.84	WT	SYP5GFP	1532420	85898
0.660499	0.617096	MP	Herm	DLW241	2023_04_05_DLW241_herm_01002_Statistics	59.26	WT	SYP5GFP	6460940	109027
0.566054	0.510577	MP	Herm	DLW241	2023_04_05_DLW241_herm_01002_Statistics	15.93	WT	SYP5GFP	1404500	88167
0.524822	0.464074	MP	Herm	DLW241	2023_04_05_DLW241_herm_01002_Statistics	36.46	WT	SYP5GFP	3803380	104317
0.61788	0.569028	MP	Herm	DLW241	2023_04_05_DLW241_herm_01002_Statistics	52.89	WT	SYP5GFP	5929470	112109
0.592001	0.539841	MP	Herm	DLW241	2023_04_05_DLW241_herm_01002_Statistics	49.18	WT	SYP5GFP	4818070	97968.1
0.406184	0.330268	EP	Herm	DLW241	2023_04_05_DLW241_herm_01002_Statistics	14.22	WT	SYP5GFP	1209730	85072.4
0.455301	0.385665	MP	Herm	DLW241	2023_04_05_DLW241_herm_01002_Statistics	34.01	WT	SYP5GFP	3421430	100601
0.501441	0.437704	MP	Herm	DLW241	2023_04_05_DLW241_herm_01002_Statistics	37.66	WT	SYP5GFP	3601310	95626.9
0.630532	0.583297	MP	Herm	DLW241	2023_04_05_DLW241_herm_01002_Statistics	24.46	WT	SYP5GFP	2498820	102159
0.425262	0.351785	MP	Herm	DLW241	2023_04_05_DLW241_herm_01002_Statistics	23.87	WT	SYP5GFP	2116780	88679.5
0.536758	0.477536	MP	Herm	DLW241	2023_04_05_DLW241_herm_01002_Statistics	26.17	WT	SYP5GFP	2755640	105298
0.602663	0.551866	MP	Herm	DLW241	2023_04_05_DLW241_herm_01002_Statistics	30.05	WT	SYP5GFP	2877420	95754.4
0.513819	0.451664	MP	Herm	DLW241	2023_04_05_DLW241_herm_01002_Statistics	21.57	WT	SYP5GFP	2152080	99771.9
0.436985	0.365007	MP	Herm	DLW241	2023_04_05_DLW241_herm_01002_Statistics	23.06	WT	SYP5GFP	2094800	90841.3
0.491032	0.425964	MP	Herm	DLW241	2023_04_05_DLW241_herm_01002_Statistics	17.83	WT	SYP5GFP	1633450	91612.5
0.470113	0.40237	MP	Herm	DLW241	2023_04_05_DLW241_herm_01002_Statistics	28.25	WT	SYP5GFP	2692230	95300.2
0.498535	0.434426	MP	Herm	DLW241	2023_04_05_DLW241_herm_01002_Statistics	23.99	WT	SYP5GFP	2193330	91426.8
0.409942	0.334507	MP	Herm	DLW241	2023_04_05_DLW241_herm_01002_Statistics	25.68	WT	SYP5GFP	2245930	87458.3
0.478938	0.412324	MP	Herm	DLW241	2023_04_05_DLW241_herm_01002_Statistics	14.98	WT	SYP5GFP	1232920	82304.4
0.454906	0.385219	MP	Herm	DLW241	2023_04_05_DLW241_herm_01002_Statistics	23.59	WT	SYP5GFP	2037760	86382.4
0.417289	0.342793	MP	Herm	DLW241	2023_04_05_DLW241_herm_01002_Statistics	24.83	WT	SYP5GFP	2032480	81855.8
0.434757	0.362495	MP	Herm	DLW241	2023_04_05_DLW241_herm_01002_Statistics	25.14	WT	SYP5GFP	2006780	79824.2
0.415026	0.340241	MP	Herm	DLW241	2023_04_05_DLW241_herm_01002_Statistics	22.2	WT	SYP5GFP	1911570	86106.8
0.452101	0.382056	MP	Herm	DLW241	2023_04_05_DLW241_herm_01002_Statistics	26.94	WT	SYP5GFP	2390900	88749.1
0.491538	0.426534	MP	Herm	DLW241	2023_04_05_DLW241_herm_01002_Statistics	27.97	WT	SYP5GFP	2666420	95331.4
0.476996	0.410133	MP	Herm	DLW241	2023_04_05_DLW241_herm_01002_Statistics	24.54	WT	SYP5GFP	2305610	93953.1
0.513103	0.450857	MP	Herm	DLW241	2023_04_05_DLW241_herm_01002_Statistics	23.18	WT	SYP5GFP	2162310	93283.4
0.982937	0.980756	LP	Herm	DLW241	2023_04_05_DLW241_herm_01002_Statistics	64.06	WT	SYP5GFP	8911220	139107
0.933126	0.924576	LP	Herm	DLW241	2023_04_05_DLW241_herm_01002_Statistics	66.74	WT	SYP5GFP	9394330	140760
0.903098	0.89071	LP	Herm	DLW241	2023_04_05_DLW241_herm_01002_Statistics	65	WT	SYP5GFP	10017700	154118
0.857383	0.839151	LP	Herm	DLW241	2023_04_05_DLW241_herm_01002_Statistics	61.83	WT	SYP5GFP	9552570	154497
0.832745	0.811362	LP	Herm	DLW241	2023_04_05_DLW241_herm_01002_Statistics	61.75	WT	SYP5GFP	8580010	138948
0.948305	0.941696	LP	Herm	DLW241	2023_04_05_DLW241_herm_01002_Statistics	61.99	WT	SYP5GFP	8657080	139653
0.851533	0.832552	LP	Herm	DLW241	2023_04_05_DLW241_herm_01002_Statistics	59.31	WT	SYP5GFP	10081600	169981
0.766468	0.736613	LP	Herm	DLW241	2023_04_05_DLW241_herm_01002_Statistics	48.1	WT	SYP5GFP	6262770	130203
0.810304	0.786052	LP	Herm	DLW241	2023_04_05_DLW241_herm_01002_Statistics	61.78	WT	SYP5GFP	8544140	138299
0.921103	0.911016	LP	Herm	DLW241	2023_04_05_DLW241_herm_01002_Statistics	71.15	WT	SYP5GFP	10963600	154091
0.968081	0.964001	LP	Herm	DLW241	2023_04_05_DLW241_herm_01002_Statistics	61.42	WT	SYP5GFP	10094400	164350
0.870943	0.854443	LP	Herm	DLW241	2023_04_05_DLW241_herm_01002_Statistics	59.4	WT	SYP5GFP	8495700	143025
0.894963	0.881534	LP	Herm	DLW241	2023_04_05_DLW241_herm_01002_Statistics	61.97	WT	SYP5GFP	9258630	149405
0.737736	0.704208	LP	Herm	DLW241	2023_04_05_DLW241_herm_01002_Statistics	53.72	WT	SYP5GFP	6546380	121861
0.757581	0.726589	LP	Herm	DLW241	2023_04_05_DLW241_herm_01002_Statistics	43.65	WT	SYP5GFP	5989790	137223
0.990401	0.989174	LP	Herm	DLW241	2023_04_05_DLW241_herm_01002_Statistics	61.17	WT	SYP5GFP	9447410	154445
0.784159	0.756565	LP	Herm	DLW241	2023_04_05_DLW241_herm_01002_Statistics	60.1	WT	SYP5GFP	9292400	154616
0.829167	0.807328	LP	Herm	DLW241	2023_04_05_DLW241_herm_01002_Statistics	62.17	WT	SYP5GFP	9564240	153840
0.935768	0.927556	LP	Herm	DLW241	2023_04_05_DLW241_herm_01002_Statistics	68.8	WT	SYP5GFP	10697400	155485
0.880777	0.865535	LP	Herm	DLW241	2023_04_05_DLW241_herm_01002_Statistics	75.46	WT	SYP5GFP	12100800	160360
0.907107	0.895231	LP	Herm	DLW241	2023_04_05_DLW241_herm_01002_Statistics	69.93	WT	SYP5GFP	10853200	155201
0.852099	0.833191	LP	Herm	DLW241	2023_04_05_DLW241_herm_01002_Statistics	70.26	WT	SYP5GFP	10892200	155027
0.728717	0.694036	LP	Herm	DLW241	2023_04_05_DLW241_herm_01002_Statistics	58.2	WT	SYP5GFP	7809430	134183
0.964881	0.960391	LP	Herm	DLW241	2023_04_05_DLW241_herm_01002_Statistics	70.29	WT	SYP5GFP	12025600	171086
0.983523	0.981417	LP	Herm	DLW241	2023_04_05_DLW241_herm_01002_Statistics	63.71	WT	SYP5GFP	10508500	164943
0.767488	0.737763	LP	Herm	DLW241	2023_04_05_DLW241_herm_01002_Statistics	53.95	WT	SYP5GFP	8446390	156560
0.808036	0.783495	LP	Herm	DLW241	2023_04_05_DLW241_herm_01002_Statistics	62.94	WT	SYP5GFP	9415190	149590
0.828654	0.806749	LP	Herm	DLW241	2023_04_05_DLW241_herm_01002_Statistics	71.91	WT	SYP5GFP	11630400	161736
0.743471	0.710676	LP	Herm	DLW241	2023_04_05_DLW241_herm_01002_Statistics	39.22	WT	SYP5GFP	5045060	128635
0.785029	0.757547	LP	Herm	DLW241	2023_04_05_DLW241_herm_01002_Statistics	65.46	WT	SYP5GFP	8806400	134531
0.94774	0.941058	LP	Herm	DLW241	2023_04_05_DLW241_herm_01002_Statistics	73.19	WT	SYP5GFP	13010400	177762
0.973394	0.969993	LP	Herm	DLW241	2023_04_05_DLW241_herm_01002_Statistics	68.75	WT	SYP5GFP	10804300	157153
0.717846	0.681774	LP	Herm	DLW241	2023_04_05_DLW241_herm_01002_Statistics	55.12	WT	SYP5GFP	7214130	130880
0.90242	0.889946	LP	Herm	DLW241	2023_04_05_DLW241_herm_01002_Statistics	78.28	WT	SYP5GFP	11844900	151315
0.784718	0.757196	LP	Herm	DLW241	2023_04_05_DLW241_herm_01002_Statistics	33.51	WT	SYP5GFP	5411130	161478
0.806484	0.781744	LP	Herm	DLW241	2023_04_05_DLW241_herm_01002_Statistics	70.94	WT	SYP5GFP	10167800	143330
0.737152	0.703549	LP	Herm	DLW241	2023_04_05_DLW241_herm_01002_Statistics	29.22	WT	SYP5GFP	3677310	125849
0.936464	0.928341	LP	Herm	DLW241	2023_04_05_DLW241_herm_01002_Statistics	74.8	WT	SYP5GFP	11230900	150146
0.8318	0.810297	LP	Herm	DLW241	2023_04_05_DLW241_herm_01002_Statistics	71.26	WT	SYP5GFP	9736630	136635
0.874814	0.85881	LP	Herm	DLW241	2023_04_05_DLW241_herm_01002_Statistics	79.3	WT	SYP5GFP	12582400	158668
0.76225	0.731855	LP	Herm	DLW241	2023_04_05_DLW241_herm_01002_Statistics	23.84	WT	SYP5GFP	3198440	134163
0.787825	0.760699	LP	Herm	DLW241	2023_04_05_DLW241_herm_01002_Statistics	43.3	WT	SYP5GFP	5309370	122618
0.71637	0.68011	LP	Herm	DLW241	2023_04_05_DLW241_herm_01002_Statistics	48.21	WT	SYP5GFP	5761250	119503
0.740892	0.707767	LP	Herm	DLW241	2023_04_05_DLW241_herm_01002_Statistics	63.17	WT	SYP5GFP	7814560	123707
0.814598	0.790896	LP	Herm	DLW241	2023_04_05_DLW241_herm_01002_Statistics	74.31	WT	SYP5GFP	9822740	132186
0.76537	0.735374	LP	Herm	DLW241	2023_04_05_DLW241_herm_01002_Statistics	63.73	WT	SYP5GFP	8647550	135690
0.714122	0.677574	LP	Herm	DLW241	2023_04_05_DLW241_herm_01002_Statistics	52.62	WT	SYP5GFP	6862230	130411
0.101399	-0.0448986	TZ	Herm	DLW241	2023_04_05_DLW241_herm_01003_Statistics	5.71	WT	SYP5GFP	450228	78849
0.0337497	-0.123562	TZ	Herm	DLW241	2023_04_05_DLW241_herm_01003_Statistics	6.01	WT	SYP5GFP	460809	76673.7
0.229799	0.104405	EP	Herm	DLW241	2023_04_05_DLW241_herm_01003_Statistics	11.56	WT	SYP5GFP	1018230	88082.2
0.213107	0.0849961	EP	Herm	DLW241	2023_04_05_DLW241_herm_01003_Statistics	14.26	WT	SYP5GFP	1300540	91202
0.204064	0.0744803	EP	Herm	DLW241	2023_04_05_DLW241_herm_01003_Statistics	9.91	WT	SYP5GFP	842036	84968.3
0.214519	0.086638	EP	Herm	DLW241	2023_04_05_DLW241_herm_01003_Statistics	13.38	WT	SYP5GFP	1174610	87788.5
0.188834	0.0567717	EP	Herm	DLW241	2023_04_05_DLW241_herm_01003_Statistics	11.54	WT	SYP5GFP	990229	85808.4
0.16055	0.0238822	EP	Herm	DLW241	2023_04_05_DLW241_herm_01003_Statistics	11.31	WT	SYP5GFP	971414	85889.8
0.164625	0.0286212	EP	Herm	DLW241	2023_04_05_DLW241_herm_01003_Statistics	11.69	WT	SYP5GFP	945998	80923.7
0.402652	0.305401	EP	Herm	DLW241	2023_04_05_DLW241_herm_01003_Statistics	23.83	WT	SYP5GFP	2439760	102382
0.413503	0.318018	EP	Herm	DLW241	2023_04_05_DLW241_herm_01003_Statistics	23.2	WT	SYP5GFP	2321380	100059
0.364016	0.260474	EP	Herm	DLW241	2023_04_05_DLW241_herm_01003_Statistics	16.95	WT	SYP5GFP	1601220	94467.3
0.384616	0.284428	EP	Herm	DLW241	2023_04_05_DLW241_herm_01003_Statistics	19.42	WT	SYP5GFP	1878200	96714.7
0.397118	0.298965	EP	Herm	DLW241	2023_04_05_DLW241_herm_01003_Statistics	17.81	WT	SYP5GFP	1796730	100883
0.317394	0.206262	EP	Herm	DLW241	2023_04_05_DLW241_herm_01003_Statistics	19.29	WT	SYP5GFP	1792210	92908.8
0.355481	0.250549	EP	Herm	DLW241	2023_04_05_DLW241_herm_01003_Statistics	18.4	WT	SYP5GFP	1724300	93712
0.296339	0.181778	EP	Herm	DLW241	2023_04_05_DLW241_herm_01003_Statistics	11.48	WT	SYP5GFP	1012980	88238.7
0.270937	0.152241	EP	Herm	DLW241	2023_04_05_DLW241_herm_01003_Statistics	13.35	WT	SYP5GFP	1151710	86270.4
0.416035	0.320962	EP	Herm	DLW241	2023_04_05_DLW241_herm_01003_Statistics	27.06	WT	SYP5GFP	2727820	100806
0.302433	0.188865	EP	Herm	DLW241	2023_04_05_DLW241_herm_01003_Statistics	17.68	WT	SYP5GFP	1676320	94814.5
0.339413	0.231865	EP	Herm	DLW241	2023_04_05_DLW241_herm_01003_Statistics	30.97	WT	SYP5GFP	3059030	98774
0.312897	0.201032	EP	Herm	DLW241	2023_04_05_DLW241_herm_01003_Statistics	17.67	WT	SYP5GFP	1652600	93525.7
0.363033	0.259331	EP	Herm	DLW241	2023_04_05_DLW241_herm_01003_Statistics	23.93	WT	SYP5GFP	2315030	96741.7
0.324297	0.214288	EP	Herm	DLW241	2023_04_05_DLW241_herm_01003_Statistics	20.66	WT	SYP5GFP	1982450	95956
0.263122	0.143154	EP	Herm	DLW241	2023_04_05_DLW241_herm_01003_Statistics	11.97	WT	SYP5GFP	1084830	90629.1
0.354814	0.249774	EP	Herm	DLW241	2023_04_05_DLW241_herm_01003_Statistics	22.34	WT	SYP5GFP	2020630	90449
0.336274	0.228216	EP	Herm	DLW241	2023_04_05_DLW241_herm_01003_Statistics	22.81	WT	SYP5GFP	2251000	98684.8
0.379217	0.278149	EP	Herm	DLW241	2023_04_05_DLW241_herm_01003_Statistics	19.69	WT	SYP5GFP	1864690	94702.4
0.390236	0.290963	EP	Herm	DLW241	2023_04_05_DLW241_herm_01003_Statistics	25.86	WT	SYP5GFP	2582630	99869.7
0.299625	0.1856	EP	Herm	DLW241	2023_04_05_DLW241_herm_01003_Statistics	20.53	WT	SYP5GFP	1909880	93028.7
0.582157	0.514129	MP	Herm	DLW241	2023_04_05_DLW241_herm_01003_Statistics	18.55	WT	SYP5GFP	2103730	113409
0.572992	0.503473	MP	Herm	DLW241	2023_04_05_DLW241_herm_01003_Statistics	31.19	WT	SYP5GFP	3601610	115473
0.592705	0.526395	MP	Herm	DLW241	2023_04_05_DLW241_herm_01003_Statistics	27.57	WT	SYP5GFP	3275300	118799
0.532394	0.456265	MP	Herm	DLW241	2023_04_05_DLW241_herm_01003_Statistics	31.95	WT	SYP5GFP	3573200	111837
0.507049	0.426794	MP	Herm	DLW241	2023_04_05_DLW241_herm_01003_Statistics	20.53	WT	SYP5GFP	2260710	110117
0.548247	0.474699	MP	Herm	DLW241	2023_04_05_DLW241_herm_01003_Statistics	30.51	WT	SYP5GFP	3641950	119369
0.584331	0.516657	MP	Herm	DLW241	2023_04_05_DLW241_herm_01003_Statistics	47.01	WT	SYP5GFP	5996550	127559
0.5635	0.492435	MP	Herm	DLW241	2023_04_05_DLW241_herm_01003_Statistics	20.51	WT	SYP5GFP	2256250	110007
0.520384	0.4423	MP	Herm	DLW241	2023_04_05_DLW241_herm_01003_Statistics	39.6	WT	SYP5GFP	4585760	115802
0.538433	0.463287	MP	Herm	DLW241	2023_04_05_DLW241_herm_01003_Statistics	37.85	WT	SYP5GFP	4427160	116966
0.457372	0.369029	MP	Herm	DLW241	2023_04_05_DLW241_herm_01003_Statistics	32.14	WT	SYP5GFP	3208250	99821.1
0.557553	0.48552	MP	Herm	DLW241	2023_04_05_DLW241_herm_01003_Statistics	41.94	WT	SYP5GFP	5343160	127400
0.492785	0.410207	MP	Herm	DLW241	2023_04_05_DLW241_herm_01003_Statistics	27.69	WT	SYP5GFP	3013310	108823
0.431177	0.338569	MP	Herm	DLW241	2023_04_05_DLW241_herm_01003_Statistics	25.12	WT	SYP5GFP	2470850	98361.9
0.501488	0.420327	MP	Herm	DLW241	2023_04_05_DLW241_herm_01003_Statistics	24.88	WT	SYP5GFP	2817470	113242
0.58039	0.512075	MP	Herm	DLW241	2023_04_05_DLW241_herm_01003_Statistics	46.35	WT	SYP5GFP	5623280	121322
0.477474	0.392403	MP	Herm	DLW241	2023_04_05_DLW241_herm_01003_Statistics	30.58	WT	SYP5GFP	3340630	109242
0.44066	0.349596	MP	Herm	DLW241	2023_04_05_DLW241_herm_01003_Statistics	19.45	WT	SYP5GFP	1992980	102467
0.555565	0.483208	MP	Herm	DLW241	2023_04_05_DLW241_herm_01003_Statistics	26.43	WT	SYP5GFP	2827230	106970
0.533658	0.457734	MP	Herm	DLW241	2023_04_05_DLW241_herm_01003_Statistics	34.02	WT	SYP5GFP	4128370	121351
0.514415	0.435359	MP	Herm	DLW241	2023_04_05_DLW241_herm_01003_Statistics	33.57	WT	SYP5GFP	3832920	114177
0.488584	0.405322	MP	Herm	DLW241	2023_04_05_DLW241_herm_01003_Statistics	29.01	WT	SYP5GFP	3311230	114141
0.453197	0.364174	MP	Herm	DLW241	2023_04_05_DLW241_herm_01003_Statistics	25.92	WT	SYP5GFP	2775400	107076
0.466339	0.379456	MP	Herm	DLW241	2023_04_05_DLW241_herm_01003_Statistics	24.73	WT	SYP5GFP	2692000	108856
0.428965	0.335997	MP	Herm	DLW241	2023_04_05_DLW241_herm_01003_Statistics	19.58	WT	SYP5GFP	2099490	107226
0.524949	0.447608	MP	Herm	DLW241	2023_04_05_DLW241_herm_01003_Statistics	38.82	WT	SYP5GFP	4382490	112893
0.505035	0.424451	MP	Herm	DLW241	2023_04_05_DLW241_herm_01003_Statistics	36.26	WT	SYP5GFP	4179840	115274
0.454178	0.365315	MP	Herm	DLW241	2023_04_05_DLW241_herm_01003_Statistics	25.36	WT	SYP5GFP	2710210	106869
0.440691	0.349633	MP	Herm	DLW241	2023_04_05_DLW241_herm_01003_Statistics	24.79	WT	SYP5GFP	2598130	104806
0.480352	0.39575	MP	Herm	DLW241	2023_04_05_DLW241_herm_01003_Statistics	30.82	WT	SYP5GFP	3439050	111585
0.497045	0.415161	MP	Herm	DLW241	2023_04_05_DLW241_herm_01003_Statistics	32.53	WT	SYP5GFP	3727960	114601
0.470987	0.38486	MP	Herm	DLW241	2023_04_05_DLW241_herm_01003_Statistics	33.4	WT	SYP5GFP	3679710	110171
0.432029	0.33956	MP	Herm	DLW241	2023_04_05_DLW241_herm_01003_Statistics	20.69	WT	SYP5GFP	2154070	104112
0.966967	0.961589	LP	Herm	DLW241	2023_04_05_DLW241_herm_01003_Statistics	60.34	WT	SYP5GFP	10358700	171672
0.930566	0.919261	LP	Herm	DLW241	2023_04_05_DLW241_herm_01003_Statistics	58.46	WT	SYP5GFP	9745550	166705
0.993644	0.992609	LP	Herm	DLW241	2023_04_05_DLW241_herm_01003_Statistics	52.54	WT	SYP5GFP	9170760	174548
0.96019	0.953709	LP	Herm	DLW241	2023_04_05_DLW241_herm_01003_Statistics	54.78	WT	SYP5GFP	10009600	182724
0.985013	0.982573	LP	Herm	DLW241	2023_04_05_DLW241_herm_01003_Statistics	55.96	WT	SYP5GFP	10275900	183629
0.942913	0.933619	LP	Herm	DLW241	2023_04_05_DLW241_herm_01003_Statistics	59.39	WT	SYP5GFP	11315900	190535
0.960226	0.95375	LP	Herm	DLW241	2023_04_05_DLW241_herm_01003_Statistics	65.19	WT	SYP5GFP	10358300	158894
0.891156	0.873436	LP	Herm	DLW241	2023_04_05_DLW241_herm_01003_Statistics	59	WT	SYP5GFP	11127900	188608
0.999503	0.999422	LP	Herm	DLW241	2023_04_05_DLW241_herm_01003_Statistics	67.51	WT	SYP5GFP	11288800	167217
0.862813	0.840478	LP	Herm	DLW241	2023_04_05_DLW241_herm_01003_Statistics	64.65	WT	SYP5GFP	12375500	191423
0.912963	0.898793	LP	Herm	DLW241	2023_04_05_DLW241_herm_01003_Statistics	61.14	WT	SYP5GFP	11280400	184501
0.925022	0.912815	LP	Herm	DLW241	2023_04_05_DLW241_herm_01003_Statistics	70.98	WT	SYP5GFP	12244800	172511
0.984327	0.981775	LP	Herm	DLW241	2023_04_05_DLW241_herm_01003_Statistics	55.87	WT	SYP5GFP	12083500	216279
0.824666	0.79612	LP	Herm	DLW241	2023_04_05_DLW241_herm_01003_Statistics	55.68	WT	SYP5GFP	10820600	194335
0.88806	0.869836	LP	Herm	DLW241	2023_04_05_DLW241_herm_01003_Statistics	60.04	WT	SYP5GFP	10726600	178658
0.838695	0.812434	LP	Herm	DLW241	2023_04_05_DLW241_herm_01003_Statistics	57.7	WT	SYP5GFP	10170500	176265
0.898343	0.881792	LP	Herm	DLW241	2023_04_05_DLW241_herm_01003_Statistics	69.74	WT	SYP5GFP	12469100	178794
0.860521	0.837813	LP	Herm	DLW241	2023_04_05_DLW241_herm_01003_Statistics	64.64	WT	SYP5GFP	11212100	173455
0.947564	0.939027	LP	Herm	DLW241	2023_04_05_DLW241_herm_01003_Statistics	62.67	WT	SYP5GFP	10973100	175093
0.964754	0.959016	LP	Herm	DLW241	2023_04_05_DLW241_herm_01003_Statistics	69.12	WT	SYP5GFP	12223100	176839
0.813344	0.782955	LP	Herm	DLW241	2023_04_05_DLW241_herm_01003_Statistics	60.52	WT	SYP5GFP	10586600	174927
0.86548	0.843579	LP	Herm	DLW241	2023_04_05_DLW241_herm_01003_Statistics	66.47	WT	SYP5GFP	11864800	178499
0.911643	0.897257	LP	Herm	DLW241	2023_04_05_DLW241_herm_01003_Statistics	72.72	WT	SYP5GFP	13369500	183849
0.801664	0.769374	LP	Herm	DLW241	2023_04_05_DLW241_herm_01003_Statistics	58.09	WT	SYP5GFP	10341000	178017
0.879213	0.859549	LP	Herm	DLW241	2023_04_05_DLW241_herm_01003_Statistics	68.43	WT	SYP5GFP	12653900	184917
0.830593	0.803013	LP	Herm	DLW241	2023_04_05_DLW241_herm_01003_Statistics	65.55	WT	SYP5GFP	11226100	171260
0.928868	0.917287	LP	Herm	DLW241	2023_04_05_DLW241_herm_01003_Statistics	70.55	WT	SYP5GFP	12277000	174018
0.773255	0.73634	LP	Herm	DLW241	2023_04_05_DLW241_herm_01003_Statistics	61.8	WT	SYP5GFP	10544000	170615
0.88937	0.871359	LP	Herm	DLW241	2023_04_05_DLW241_herm_01003_Statistics	74.03	WT	SYP5GFP	13200200	178309
0.805172	0.773452	LP	Herm	DLW241	2023_04_05_DLW241_herm_01003_Statistics	42.44	WT	SYP5GFP	9048020	213196
0.846797	0.821855	LP	Herm	DLW241	2023_04_05_DLW241_herm_01003_Statistics	61.42	WT	SYP5GFP	11708100	190624
0.744332	0.702708	LP	Herm	DLW241	2023_04_05_DLW241_herm_01003_Statistics	58.22	WT	SYP5GFP	9682700	166312
0.786765	0.752048	LP	Herm	DLW241	2023_04_05_DLW241_herm_01003_Statistics	52.15	WT	SYP5GFP	9299590	178324
0.758933	0.719685	LP	Herm	DLW241	2023_04_05_DLW241_herm_01003_Statistics	63.32	WT	SYP5GFP	10904300	172209
0.821194	0.792084	LP	Herm	DLW241	2023_04_05_DLW241_herm_01003_Statistics	32.89	WT	SYP5GFP	7160100	217698
0.713325	0.666653	MP	Herm	DLW241	2023_04_05_DLW241_herm_01003_Statistics	58.36	WT	SYP5GFP	9415950	161343
0.731307	0.687562	LP	Herm	DLW241	2023_04_05_DLW241_herm_01003_Statistics	59.96	WT	SYP5GFP	9822870	163824
0.800895	0.76848	LP	Herm	DLW241	2023_04_05_DLW241_herm_01003_Statistics	66.42	WT	SYP5GFP	11998100	180640
0.824703	0.796164	LP	Herm	DLW241	2023_04_05_DLW241_herm_01003_Statistics	51.33	WT	SYP5GFP	10420700	203014
0.684985	0.633699	MP	Herm	DLW241	2023_04_05_DLW241_herm_01003_Statistics	54.1	WT	SYP5GFP	7758940	143418
0.776905	0.740584	LP	Herm	DLW241	2023_04_05_DLW241_herm_01003_Statistics	69.71	WT	SYP5GFP	12264800	175940
0.6586	0.603019	MP	Herm	DLW241	2023_04_05_DLW241_herm_01003_Statistics	41.85	WT	SYP5GFP	5913620	141305
0.775009	0.738379	LP	Herm	DLW241	2023_04_05_DLW241_herm_01003_Statistics	51.73	WT	SYP5GFP	9637280	186300
0.720051	0.674473	LP	Herm	DLW241	2023_04_05_DLW241_herm_01003_Statistics	56.22	WT	SYP5GFP	9508560	169131
0.700924	0.652233	MP	Herm	DLW241	2023_04_05_DLW241_herm_01003_Statistics	53.99	WT	SYP5GFP	8656370	160333
0.74727	0.706124	LP	Herm	DLW241	2023_04_05_DLW241_herm_01003_Statistics	61.93	WT	SYP5GFP	10189000	164524
0.794704	0.761281	LP	Herm	DLW241	2023_04_05_DLW241_herm_01003_Statistics	53.36	WT	SYP5GFP	9952490	186516
0.633553	0.573893	MP	Herm	DLW241	2023_04_05_DLW241_herm_01003_Statistics	51.55	WT	SYP5GFP	7298940	141590
0.747397	0.706272	LP	Herm	DLW241	2023_04_05_DLW241_herm_01003_Statistics	58.58	WT	SYP5GFP	9913710	169234
0.675388	0.62254	MP	Herm	DLW241	2023_04_05_DLW241_herm_01003_Statistics	50.44	WT	SYP5GFP	7376060	146234
0.648188	0.590911	MP	Herm	DLW241	2023_04_05_DLW241_herm_01003_Statistics	48.51	WT	SYP5GFP	6585900	135764
0.716831	0.670729	LP	Herm	DLW241	2023_04_05_DLW241_herm_01003_Statistics	52.29	WT	SYP5GFP	8734430	167038
0.607406	0.54349	MP	Herm	DLW241	2023_04_05_DLW241_herm_01003_Statistics	43.63	WT	SYP5GFP	5866500	134460
0.692632	0.642591	MP	Herm	DLW241	2023_04_05_DLW241_herm_01003_Statistics	53.62	WT	SYP5GFP	8768130	163523
0.684298	0.6329	MP	Herm	DLW241	2023_04_05_DLW241_herm_01003_Statistics	50.25	WT	SYP5GFP	8302350	165221
0.734261	0.690997	LP	Herm	DLW241	2023_04_05_DLW241_herm_01003_Statistics	60.17	WT	SYP5GFP	10168100	168990
0.666009	0.611634	MP	Herm	DLW241	2023_04_05_DLW241_herm_01003_Statistics	53.5	WT	SYP5GFP	8131880	151998
0.694158	0.644365	MP	Herm	DLW241	2023_04_05_DLW241_herm_01003_Statistics	30.62	WT	SYP5GFP	4787180	156342
0.62177	0.560191	MP	Herm	DLW241	2023_04_05_DLW241_herm_01003_Statistics	48.76	WT	SYP5GFP	6053190	124143
0.595829	0.530028	MP	Herm	DLW241	2023_04_05_DLW241_herm_01003_Statistics	46.65	WT	SYP5GFP	5990560	128415
0.658282	0.602648	MP	Herm	DLW241	2023_04_05_DLW241_herm_01003_Statistics	60.65	WT	SYP5GFP	9205680	151784
0.631904	0.571976	MP	Herm	DLW241	2023_04_05_DLW241_herm_01003_Statistics	45.2	WT	SYP5GFP	6578650	145545
0.612755	0.549709	MP	Herm	DLW241	2023_04_05_DLW241_herm_01003_Statistics	45.24	WT	SYP5GFP	5881790	130013
0.672152	0.618777	MP	Herm	DLW241	2023_04_05_DLW241_herm_01003_Statistics	60.29	WT	SYP5GFP	8557940	141946
0.607493	0.54359	MP	Herm	DLW241	2023_04_05_DLW241_herm_01003_Statistics	47.84	WT	SYP5GFP	6220290	130023
0.636177	0.576945	MP	Herm	DLW241	2023_04_05_DLW241_herm_01003_Statistics	56.17	WT	SYP5GFP	7582560	134993
0.0994865	-0.00209931	TZ	Herm	DLW241	2023_04_05_DLW241_herm_01004_Statistics	7.23	WT	SYP5GFP	527471	72955.9
0.0932465	-0.00904332	TZ	Herm	DLW241	2023_04_05_DLW241_herm_01004_Statistics	7.33	WT	SYP5GFP	525181	71648.2
0.161046	0.0664049	EP	Herm	DLW241	2023_04_05_DLW241_herm_01004_Statistics	6.77	WT	SYP5GFP	463458	68457.6
0.133691	0.035964	EP	Herm	DLW241	2023_04_05_DLW241_herm_01004_Statistics	7.94	WT	SYP5GFP	598112	75329
0.238975	0.153125	EP	Herm	DLW241	2023_04_05_DLW241_herm_01004_Statistics	14.69	WT	SYP5GFP	1087840	74053.1
0.126455	0.0279112	EP	Herm	DLW241	2023_04_05_DLW241_herm_01004_Statistics	4.61	WT	SYP5GFP	321893	69824.9
0.140151	0.043152	EP	Herm	DLW241	2023_04_05_DLW241_herm_01004_Statistics	6.54	WT	SYP5GFP	499967	76447.6
0.140568	0.043616	EP	Herm	DLW241	2023_04_05_DLW241_herm_01004_Statistics	11.87	WT	SYP5GFP	854676	72003
0.177122	0.0842946	EP	Herm	DLW241	2023_04_05_DLW241_herm_01004_Statistics	14.98	WT	SYP5GFP	1109550	74068.8
0.230506	0.1437	EP	Herm	DLW241	2023_04_05_DLW241_herm_01004_Statistics	17.32	WT	SYP5GFP	1359660	78502.3
0.251069	0.166583	EP	Herm	DLW241	2023_04_05_DLW241_herm_01004_Statistics	13.69	WT	SYP5GFP	1102900	80562.5
0.267197	0.18453	EP	Herm	DLW241	2023_04_05_DLW241_herm_01004_Statistics	16.51	WT	SYP5GFP	1306040	79106
0.313623	0.236193	EP	Herm	DLW241	2023_04_05_DLW241_herm_01004_Statistics	14.46	WT	SYP5GFP	1125160	77811.9
0.258354	0.174689	EP	Herm	DLW241	2023_04_05_DLW241_herm_01004_Statistics	18.8	WT	SYP5GFP	1524430	81086.7
0.334204	0.259097	EP	Herm	DLW241	2023_04_05_DLW241_herm_01004_Statistics	16.48	WT	SYP5GFP	1303140	79074
0.348276	0.274756	EP	Herm	DLW241	2023_04_05_DLW241_herm_01004_Statistics	23.4	WT	SYP5GFP	1865310	79714.1
0.302385	0.223688	EP	Herm	DLW241	2023_04_05_DLW241_herm_01004_Statistics	17.21	WT	SYP5GFP	1397810	81220.8
0.288661	0.208416	EP	Herm	DLW241	2023_04_05_DLW241_herm_01004_Statistics	18.13	WT	SYP5GFP	1427080	78713.7
0.320095	0.243396	EP	Herm	DLW241	2023_04_05_DLW241_herm_01004_Statistics	17.58	WT	SYP5GFP	1438280	81813.4
0.358168	0.285764	EP	Herm	DLW241	2023_04_05_DLW241_herm_01004_Statistics	20.01	WT	SYP5GFP	1707200	85317.3
0.318365	0.241471	EP	Herm	DLW241	2023_04_05_DLW241_herm_01004_Statistics	17.38	WT	SYP5GFP	1358540	78166.9
0.372941	0.302203	EP	Herm	DLW241	2023_04_05_DLW241_herm_01004_Statistics	26.27	WT	SYP5GFP	2167420	82505.5
0.320303	0.243628	EP	Herm	DLW241	2023_04_05_DLW241_herm_01004_Statistics	18.38	WT	SYP5GFP	1497940	81498.4
0.33087	0.255386	EP	Herm	DLW241	2023_04_05_DLW241_herm_01004_Statistics	11.28	WT	SYP5GFP	923179	81842.1
0.382627	0.312982	EP	Herm	DLW241	2023_04_05_DLW241_herm_01004_Statistics	19.85	WT	SYP5GFP	1744050	87861.5
0.350788	0.277551	EP	Herm	DLW241	2023_04_05_DLW241_herm_01004_Statistics	18.93	WT	SYP5GFP	1623460	85761.2
0.344983	0.271092	EP	Herm	DLW241	2023_04_05_DLW241_herm_01004_Statistics	8.24	WT	SYP5GFP	675903	82027.1
0.369164	0.298	EP	Herm	DLW241	2023_04_05_DLW241_herm_01004_Statistics	21.6	WT	SYP5GFP	1893690	87670.8
0.389165	0.320258	EP	Herm	DLW241	2023_04_05_DLW241_herm_01004_Statistics	21.3	WT	SYP5GFP	1878100	88173.7
0.362465	0.290545	EP	Herm	DLW241	2023_04_05_DLW241_herm_01004_Statistics	10.22	WT	SYP5GFP	786140	76921.7
0.416164	0.350303	MP	Herm	DLW241	2023_04_05_DLW241_herm_01004_Statistics	18.18	WT	SYP5GFP	1463740	80513.8
0.404088	0.336863	MP	Herm	DLW241	2023_04_05_DLW241_herm_01004_Statistics	14.65	WT	SYP5GFP	1237810	84492.2
0.433685	0.369799	MP	Herm	DLW241	2023_04_05_DLW241_herm_01004_Statistics	15.09	WT	SYP5GFP	1328170	88016.6
0.425438	0.360622	MP	Herm	DLW241	2023_04_05_DLW241_herm_01004_Statistics	28.01	WT	SYP5GFP	2365600	84455.6
0.456278	0.394941	MP	Herm	DLW241	2023_04_05_DLW241_herm_01004_Statistics	29.03	WT	SYP5GFP	2576080	88738.5
0.413787	0.347657	MP	Herm	DLW241	2023_04_05_DLW241_herm_01004_Statistics	11.87	WT	SYP5GFP	980149	82573.6
0.436648	0.373097	MP	Herm	DLW241	2023_04_05_DLW241_herm_01004_Statistics	17.71	WT	SYP5GFP	1558000	87972.9
0.407049	0.340158	MP	Herm	DLW241	2023_04_05_DLW241_herm_01004_Statistics	29.48	WT	SYP5GFP	2550200	86506.1
0.482146	0.423727	MP	Herm	DLW241	2023_04_05_DLW241_herm_01004_Statistics	26.14	WT	SYP5GFP	2511880	96093.3
0.458938	0.397902	MP	Herm	DLW241	2023_04_05_DLW241_herm_01004_Statistics	21.66	WT	SYP5GFP	2075330	95813.9
0.466784	0.406633	MP	Herm	DLW241	2023_04_05_DLW241_herm_01004_Statistics	28.96	WT	SYP5GFP	2570850	88772.4
0.420504	0.355132	MP	Herm	DLW241	2023_04_05_DLW241_herm_01004_Statistics	29.41	WT	SYP5GFP	2641420	89813.7
0.447022	0.384641	MP	Herm	DLW241	2023_04_05_DLW241_herm_01004_Statistics	24.75	WT	SYP5GFP	2226700	89967.7
0.432232	0.368183	MP	Herm	DLW241	2023_04_05_DLW241_herm_01004_Statistics	25.54	WT	SYP5GFP	2270170	88886.8
0.457537	0.396342	MP	Herm	DLW241	2023_04_05_DLW241_herm_01004_Statistics	23.52	WT	SYP5GFP	2242020	95324
0.443727	0.380975	MP	Herm	DLW241	2023_04_05_DLW241_herm_01004_Statistics	23.08	WT	SYP5GFP	2187120	94762.6
0.482033	0.423602	MP	Herm	DLW241	2023_04_05_DLW241_herm_01004_Statistics	24.7	WT	SYP5GFP	2455590	99416.6
0.527901	0.474644	MP	Herm	DLW241	2023_04_05_DLW241_herm_01004_Statistics	26.38	WT	SYP5GFP	2482630	94110.3
0.463679	0.403177	MP	Herm	DLW241	2023_04_05_DLW241_herm_01004_Statistics	24.8	WT	SYP5GFP	2686120	108311
0.504424	0.448519	MP	Herm	DLW241	2023_04_05_DLW241_herm_01004_Statistics	32.83	WT	SYP5GFP	3153900	96067.6
0.524931	0.471339	MP	Herm	DLW241	2023_04_05_DLW241_herm_01004_Statistics	21.78	WT	SYP5GFP	2052390	94232.8
0.481777	0.423316	MP	Herm	DLW241	2023_04_05_DLW241_herm_01004_Statistics	12.97	WT	SYP5GFP	1103170	85055.5
0.506408	0.450727	MP	Herm	DLW241	2023_04_05_DLW241_herm_01004_Statistics	22.29	WT	SYP5GFP	2061880	92502.5
0.500482	0.444132	MP	Herm	DLW241	2023_04_05_DLW241_herm_01004_Statistics	29.91	WT	SYP5GFP	2832490	94700.4
0.507662	0.452122	MP	Herm	DLW241	2023_04_05_DLW241_herm_01004_Statistics	37.72	WT	SYP5GFP	3746000	99310.7
0.545431	0.494151	MP	Herm	DLW241	2023_04_05_DLW241_herm_01004_Statistics	34.94	WT	SYP5GFP	3775380	108053
0.551049	0.500403	MP	Herm	DLW241	2023_04_05_DLW241_herm_01004_Statistics	44.02	WT	SYP5GFP	4658520	105827
0.526286	0.472847	MP	Herm	DLW241	2023_04_05_DLW241_herm_01004_Statistics	21.31	WT	SYP5GFP	2143490	100586
0.581882	0.534714	MP	Herm	DLW241	2023_04_05_DLW241_herm_01004_Statistics	51.19	WT	SYP5GFP	5461350	106688
0.522687	0.468842	MP	Herm	DLW241	2023_04_05_DLW241_herm_01004_Statistics	32.68	WT	SYP5GFP	3246130	99330.8
0.554715	0.504483	MP	Herm	DLW241	2023_04_05_DLW241_herm_01004_Statistics	32.27	WT	SYP5GFP	3419480	105965
0.570929	0.522526	MP	Herm	DLW241	2023_04_05_DLW241_herm_01004_Statistics	30.74	WT	SYP5GFP	3357730	109230
0.535224	0.482793	MP	Herm	DLW241	2023_04_05_DLW241_herm_01004_Statistics	36.27	WT	SYP5GFP	3665620	101065
0.577591	0.52994	MP	Herm	DLW241	2023_04_05_DLW241_herm_01004_Statistics	43.65	WT	SYP5GFP	4767480	109221
0.559621	0.509942	MP	Herm	DLW241	2023_04_05_DLW241_herm_01004_Statistics	28.4	WT	SYP5GFP	3227460	113643
0.584014	0.537087	MP	Herm	DLW241	2023_04_05_DLW241_herm_01004_Statistics	49.52	WT	SYP5GFP	5630890	113709
0.591774	0.545722	MP	Herm	DLW241	2023_04_05_DLW241_herm_01004_Statistics	27.57	WT	SYP5GFP	3135910	113744
0.618425	0.57538	MP	Herm	DLW241	2023_04_05_DLW241_herm_01004_Statistics	31.5	WT	SYP5GFP	3476010	110350
0.602408	0.557556	MP	Herm	DLW241	2023_04_05_DLW241_herm_01004_Statistics	46.38	WT	SYP5GFP	5405600	116550
0.603837	0.559146	MP	Herm	DLW241	2023_04_05_DLW241_herm_01004_Statistics	30.51	WT	SYP5GFP	3589040	117635
0.652428	0.613219	MP	Herm	DLW241	2023_04_05_DLW241_herm_01004_Statistics	37.52	WT	SYP5GFP	4828800	128699
0.624402	0.582031	MP	Herm	DLW241	2023_04_05_DLW241_herm_01004_Statistics	35.3	WT	SYP5GFP	4323410	122476
0.663084	0.625077	MP	Herm	DLW241	2023_04_05_DLW241_herm_01004_Statistics	54.71	WT	SYP5GFP	7197760	131562
0.645864	0.605914	MP	Herm	DLW241	2023_04_05_DLW241_herm_01004_Statistics	31.76	WT	SYP5GFP	4201600	132292
0.636277	0.595246	MP	Herm	DLW241	2023_04_05_DLW241_herm_01004_Statistics	47.35	WT	SYP5GFP	5960270	125877
0.648605	0.608964	MP	Herm	DLW241	2023_04_05_DLW241_herm_01004_Statistics	40.63	WT	SYP5GFP	5545890	136497
0.688005	0.652809	MP	Herm	DLW241	2023_04_05_DLW241_herm_01004_Statistics	53.24	WT	SYP5GFP	7377830	138577
0.678611	0.642356	MP	Herm	DLW241	2023_04_05_DLW241_herm_01004_Statistics	52.23	WT	SYP5GFP	7445960	142561
0.6693	0.631994	MP	Herm	DLW241	2023_04_05_DLW241_herm_01004_Statistics	51.86	WT	SYP5GFP	6962790	134261
0.661571	0.623394	MP	Herm	DLW241	2023_04_05_DLW241_herm_01004_Statistics	50	WT	SYP5GFP	6538890	130778
0.67393	0.637147	MP	Herm	DLW241	2023_04_05_DLW241_herm_01004_Statistics	27.96	WT	SYP5GFP	3663870	131040
0.681897	0.646012	MP	Herm	DLW241	2023_04_05_DLW241_herm_01004_Statistics	28.88	WT	SYP5GFP	4178670	144691
0.696604	0.662378	MP	Herm	DLW241	2023_04_05_DLW241_herm_01004_Statistics	43.69	WT	SYP5GFP	5633880	128951
0.731981	0.701746	LP	Herm	DLW241	2023_04_05_DLW241_herm_01004_Statistics	35.63	WT	SYP5GFP	6364020	178614
0.707537	0.674545	LP	Herm	DLW241	2023_04_05_DLW241_herm_01004_Statistics	54.21	WT	SYP5GFP	7889330	145533
0.719173	0.687493	LP	Herm	DLW241	2023_04_05_DLW241_herm_01004_Statistics	44.59	WT	SYP5GFP	6446700	144577
0.742498	0.71345	LP	Herm	DLW241	2023_04_05_DLW241_herm_01004_Statistics	61.07	WT	SYP5GFP	9852950	161339
0.749649	0.721407	LP	Herm	DLW241	2023_04_05_DLW241_herm_01004_Statistics	61.98	WT	SYP5GFP	10343400	166883
0.76284	0.736087	LP	Herm	DLW241	2023_04_05_DLW241_herm_01004_Statistics	53.95	WT	SYP5GFP	9119260	169032
0.759373	0.732228	LP	Herm	DLW241	2023_04_05_DLW241_herm_01004_Statistics	35.01	WT	SYP5GFP	5814800	166090
0.774466	0.749024	LP	Herm	DLW241	2023_04_05_DLW241_herm_01004_Statistics	62.39	WT	SYP5GFP	11082200	177628
0.798068	0.775288	LP	Herm	DLW241	2023_04_05_DLW241_herm_01004_Statistics	57.82	WT	SYP5GFP	9868990	170685
0.786278	0.762168	LP	Herm	DLW241	2023_04_05_DLW241_herm_01004_Statistics	66.41	WT	SYP5GFP	10624000	159976
0.786036	0.761899	LP	Herm	DLW241	2023_04_05_DLW241_herm_01004_Statistics	42.13	WT	SYP5GFP	7207790	171085
0.83007	0.8109	LP	Herm	DLW241	2023_04_05_DLW241_herm_01004_Statistics	57.63	WT	SYP5GFP	10012700	173741
0.818141	0.797625	LP	Herm	DLW241	2023_04_05_DLW241_herm_01004_Statistics	37.45	WT	SYP5GFP	6984230	186495
0.819576	0.799223	LP	Herm	DLW241	2023_04_05_DLW241_herm_01004_Statistics	59.52	WT	SYP5GFP	10115200	169946
0.807529	0.785817	LP	Herm	DLW241	2023_04_05_DLW241_herm_01004_Statistics	42.53	WT	SYP5GFP	7583550	178311
0.808853	0.78729	LP	Herm	DLW241	2023_04_05_DLW241_herm_01004_Statistics	55.41	WT	SYP5GFP	9529750	171986
0.832171	0.813239	LP	Herm	DLW241	2023_04_05_DLW241_herm_01004_Statistics	61.97	WT	SYP5GFP	10769500	173786
0.846902	0.829631	LP	Herm	DLW241	2023_04_05_DLW241_herm_01004_Statistics	61.73	WT	SYP5GFP	10467400	169567
0.840303	0.822288	LP	Herm	DLW241	2023_04_05_DLW241_herm_01004_Statistics	42.61	WT	SYP5GFP	8098020	190050
0.876495	0.862562	LP	Herm	DLW241	2023_04_05_DLW241_herm_01004_Statistics	59.21	WT	SYP5GFP	10290100	173790
0.859708	0.843881	LP	Herm	DLW241	2023_04_05_DLW241_herm_01004_Statistics	67.47	WT	SYP5GFP	11699600	173404
0.878645	0.864955	LP	Herm	DLW241	2023_04_05_DLW241_herm_01004_Statistics	55.87	WT	SYP5GFP	10238400	183254
0.902706	0.89173	LP	Herm	DLW241	2023_04_05_DLW241_herm_01004_Statistics	64.56	WT	SYP5GFP	11313200	175235
0.896761	0.885115	LP	Herm	DLW241	2023_04_05_DLW241_herm_01004_Statistics	58.07	WT	SYP5GFP	10182800	175354
0.936654	0.929508	LP	Herm	DLW241	2023_04_05_DLW241_herm_01004_Statistics	61.79	WT	SYP5GFP	10452200	169157
0.943645	0.937288	LP	Herm	DLW241	2023_04_05_DLW241_herm_01004_Statistics	60.18	WT	SYP5GFP	10429700	173308
0.94204	0.935502	LP	Herm	DLW241	2023_04_05_DLW241_herm_01004_Statistics	62.47	WT	SYP5GFP	11103000	177733
0.919266	0.910159	LP	Herm	DLW241	2023_04_05_DLW241_herm_01004_Statistics	65.27	WT	SYP5GFP	10998800	168512
0.91568	0.906168	LP	Herm	DLW241	2023_04_05_DLW241_herm_01004_Statistics	65.3	WT	SYP5GFP	11830600	181173
0.917952	0.908697	LP	Herm	DLW241	2023_04_05_DLW241_herm_01004_Statistics	60.87	WT	SYP5GFP	9935640	163227
0.962177	0.95791	LP	Herm	DLW241	2023_04_05_DLW241_herm_01004_Statistics	63.69	WT	SYP5GFP	11336500	177995
0.940523	0.933813	LP	Herm	DLW241	2023_04_05_DLW241_herm_01004_Statistics	56.65	WT	SYP5GFP	9950170	175643
0.989699	0.988537	LP	Herm	DLW241	2023_04_05_DLW241_herm_01004_Statistics	60.19	WT	SYP5GFP	9554800	158744
0.966569	0.962798	LP	Herm	DLW241	2023_04_05_DLW241_herm_01004_Statistics	64.23	WT	SYP5GFP	10322700	160715
0.964444	0.960433	LP	Herm	DLW241	2023_04_05_DLW241_herm_01004_Statistics	68.3	WT	SYP5GFP	11611100	170001
0.962877	0.95869	LP	Herm	DLW241	2023_04_05_DLW241_herm_01004_Statistics	61.18	WT	SYP5GFP	9830800	160686
0.987141	0.98569	LP	Herm	DLW241	2023_04_05_DLW241_herm_01004_Statistics	57.99	WT	SYP5GFP	10731600	185059
0.988773	0.987507	LP	Herm	DLW241	2023_04_05_DLW241_herm_01004_Statistics	63.51	WT	SYP5GFP	9779620	153986
0.998762	0.998622	LP	Herm	DLW241	2023_04_05_DLW241_herm_01004_Statistics	62.81	WT	SYP5GFP	10753800	171212
0.181678	-0.00440289	TZ	Herm	DLW241	2023_04_05_DLW241_herm_01005_Statistics	15.62	WT	SYP5GFP	900106	57625.2
0.164472	-0.0255212	TZ	Herm	DLW241	2023_04_05_DLW241_herm_01005_Statistics	20.8	WT	SYP5GFP	1120350	53863
0.170956	-0.0175623	TZ	Herm	DLW241	2023_04_05_DLW241_herm_01005_Statistics	18.5	WT	SYP5GFP	1048940	56699.5
0.113266	-0.0883712	TZ	Herm	DLW241	2023_04_05_DLW241_herm_01005_Statistics	16.32	WT	SYP5GFP	904288	55409.8
0.134018	-0.0628999	TZ	Herm	DLW241	2023_04_05_DLW241_herm_01005_Statistics	14	WT	SYP5GFP	814581	58184.4
0.168056	-0.0211219	TZ	Herm	DLW241	2023_04_05_DLW241_herm_01005_Statistics	17.36	WT	SYP5GFP	1001940	57715.4
0.150778	-0.0423282	TZ	Herm	DLW241	2023_04_05_DLW241_herm_01005_Statistics	19.27	WT	SYP5GFP	1087090	56413.6
0.182316	-0.0036189	TZ	Herm	DLW241	2023_04_05_DLW241_herm_01005_Statistics	16.62	WT	SYP5GFP	925891	55709.4
0.123375	-0.0759635	TZ	Herm	DLW241	2023_04_05_DLW241_herm_01005_Statistics	16.21	WT	SYP5GFP	883661	54513.3
0.158799	-0.0324836	TZ	Herm	DLW241	2023_04_05_DLW241_herm_01005_Statistics	21.19	WT	SYP5GFP	1190150	56165.6
0.139158	-0.0565909	TZ	Herm	DLW241	2023_04_05_DLW241_herm_01005_Statistics	19.05	WT	SYP5GFP	1052460	55247.2
0.101403	-0.102932	TZ	Herm	DLW241	2023_04_05_DLW241_herm_01005_Statistics	14.25	WT	SYP5GFP	775170	54397.9
0.182047	-0.00395003	TZ	Herm	DLW241	2023_04_05_DLW241_herm_01005_Statistics	16.08	WT	SYP5GFP	906775	56391.5
0.305822	0.147971	EP	Herm	DLW241	2023_04_05_DLW241_herm_01005_Statistics	25.35	WT	SYP5GFP	1522810	60071.4
0.198121	0.0157791	EP	Herm	DLW241	2023_04_05_DLW241_herm_01005_Statistics	17.94	WT	SYP5GFP	1059560	59061.3
0.262056	0.0942533	EP	Herm	DLW241	2023_04_05_DLW241_herm_01005_Statistics	13.82	WT	SYP5GFP	762120	55146.2
0.335587	0.184504	EP	Herm	DLW241	2023_04_05_DLW241_herm_01005_Statistics	34.28	WT	SYP5GFP	2184020	63711.2
0.298903	0.139479	EP	Herm	DLW241	2023_04_05_DLW241_herm_01005_Statistics	21.1	WT	SYP5GFP	1294090	61331.3
0.317344	0.162114	EP	Herm	DLW241	2023_04_05_DLW241_herm_01005_Statistics	17.97	WT	SYP5GFP	1130060	62885.9
0.193356	0.00993127	EP	Herm	DLW241	2023_04_05_DLW241_herm_01005_Statistics	16.89	WT	SYP5GFP	971073	57494
0.35806	0.212088	EP	Herm	DLW241	2023_04_05_DLW241_herm_01005_Statistics	27.38	WT	SYP5GFP	1807110	66001.1
0.381522	0.240885	EP	Herm	DLW241	2023_04_05_DLW241_herm_01005_Statistics	37.64	WT	SYP5GFP	2465210	65494.4
0.407472	0.272736	EP	Herm	DLW241	2023_04_05_DLW241_herm_01005_Statistics	35.08	WT	SYP5GFP	2449590	69828.7
0.20874	0.0288134	EP	Herm	DLW241	2023_04_05_DLW241_herm_01005_Statistics	15.37	WT	SYP5GFP	875226	56943.8
0.3165	0.161077	EP	Herm	DLW241	2023_04_05_DLW241_herm_01005_Statistics	23.87	WT	SYP5GFP	1533450	64241.7
0.465746	0.344261	MP	Herm	DLW241	2023_04_05_DLW241_herm_01005_Statistics	50.56	WT	SYP5GFP	3671350	72613.7
0.273361	0.108129	EP	Herm	DLW241	2023_04_05_DLW241_herm_01005_Statistics	15.22	WT	SYP5GFP	901193	59211.1
0.484701	0.367526	MP	Herm	DLW241	2023_04_05_DLW241_herm_01005_Statistics	40.73	WT	SYP5GFP	3098560	76075.6
0.456905	0.333409	MP	Herm	DLW241	2023_04_05_DLW241_herm_01005_Statistics	40.51	WT	SYP5GFP	3010600	74317.5
0.332088	0.18021	EP	Herm	DLW241	2023_04_05_DLW241_herm_01005_Statistics	36.15	WT	SYP5GFP	2400500	66403.9
0.242986	0.0708462	EP	Herm	DLW241	2023_04_05_DLW241_herm_01005_Statistics	29.91	WT	SYP5GFP	1809670	60503.8
0.357584	0.211504	EP	Herm	DLW241	2023_04_05_DLW241_herm_01005_Statistics	37.93	WT	SYP5GFP	2576660	67932
0.325785	0.172473	EP	Herm	DLW241	2023_04_05_DLW241_herm_01005_Statistics	39.39	WT	SYP5GFP	2516380	63883.7
0.350542	0.20286	EP	Herm	DLW241	2023_04_05_DLW241_herm_01005_Statistics	42.11	WT	SYP5GFP	2759480	65530.3
0.364577	0.220087	EP	Herm	DLW241	2023_04_05_DLW241_herm_01005_Statistics	24.45	WT	SYP5GFP	1648150	67409
0.29051	0.129177	EP	Herm	DLW241	2023_04_05_DLW241_herm_01005_Statistics	25.91	WT	SYP5GFP	1570650	60619.5
0.272745	0.107372	EP	Herm	DLW241	2023_04_05_DLW241_herm_01005_Statistics	10.91	WT	SYP5GFP	715230	65557.3
0.490243	0.374328	MP	Herm	DLW241	2023_04_05_DLW241_herm_01005_Statistics	42.23	WT	SYP5GFP	3051870	72267.8
0.647171	0.566941	MP	Herm	DLW241	2023_04_05_DLW241_herm_01005_Statistics	6.1	WT	SYP5GFP	526519	86314.6
0.624697	0.539356	MP	Herm	DLW241	2023_04_05_DLW241_herm_01005_Statistics	8.03	WT	SYP5GFP	616200	76737.2
0.633074	0.549638	MP	Herm	DLW241	2023_04_05_DLW241_herm_01005_Statistics	8.07	WT	SYP5GFP	692382	85797
0.631468	0.547667	MP	Herm	DLW241	2023_04_05_DLW241_herm_01005_Statistics	44.67	WT	SYP5GFP	3877660	86806.8
0.627172	0.542394	MP	Herm	DLW241	2023_04_05_DLW241_herm_01005_Statistics	49.86	WT	SYP5GFP	3830200	76819.1
0.552719	0.451011	MP	Herm	DLW241	2023_04_05_DLW241_herm_01005_Statistics	40.52	WT	SYP5GFP	3468510	85600
0.607327	0.518037	MP	Herm	DLW241	2023_04_05_DLW241_herm_01005_Statistics	22.35	WT	SYP5GFP	1613670	72200
0.647645	0.567521	MP	Herm	DLW241	2023_04_05_DLW241_herm_01005_Statistics	36.65	WT	SYP5GFP	2919220	79651.3
0.530385	0.423598	MP	Herm	DLW241	2023_04_05_DLW241_herm_01005_Statistics	35.94	WT	SYP5GFP	2863760	79681.7
0.502831	0.389778	MP	Herm	DLW241	2023_04_05_DLW241_herm_01005_Statistics	48.04	WT	SYP5GFP	3572910	74373.6
0.624495	0.539108	MP	Herm	DLW241	2023_04_05_DLW241_herm_01005_Statistics	42.05	WT	SYP5GFP	3591180	85402.6
0.586304	0.492233	MP	Herm	DLW241	2023_04_05_DLW241_herm_01005_Statistics	34.46	WT	SYP5GFP	2474070	71795.4
0.663629	0.58714	MP	Herm	DLW241	2023_04_05_DLW241_herm_01005_Statistics	63.2	WT	SYP5GFP	5648200	89370.3
0.559446	0.459268	MP	Herm	DLW241	2023_04_05_DLW241_herm_01005_Statistics	46.55	WT	SYP5GFP	3439680	73892.2
0.602841	0.51253	MP	Herm	DLW241	2023_04_05_DLW241_herm_01005_Statistics	37.5	WT	SYP5GFP	2715320	72408.5
0.638161	0.555882	MP	Herm	DLW241	2023_04_05_DLW241_herm_01005_Statistics	29.03	WT	SYP5GFP	2368950	81603.5
0.536116	0.430632	MP	Herm	DLW241	2023_04_05_DLW241_herm_01005_Statistics	43.91	WT	SYP5GFP	3247940	73968.1
0.509155	0.39754	MP	Herm	DLW241	2023_04_05_DLW241_herm_01005_Statistics	45.85	WT	SYP5GFP	3374350	73595.4
0.577797	0.481792	MP	Herm	DLW241	2023_04_05_DLW241_herm_01005_Statistics	35.19	WT	SYP5GFP	2828800	80386.5
0.617602	0.530647	MP	Herm	DLW241	2023_04_05_DLW241_herm_01005_Statistics	32.8	WT	SYP5GFP	2496530	76113.7
0.552488	0.450728	MP	Herm	DLW241	2023_04_05_DLW241_herm_01005_Statistics	36.87	WT	SYP5GFP	2923740	79298.6
0.678001	0.604781	MP	Herm	DLW241	2023_04_05_DLW241_herm_01005_Statistics	58.52	WT	SYP5GFP	5412710	92493.3
0.517805	0.408157	MP	Herm	DLW241	2023_04_05_DLW241_herm_01005_Statistics	50.21	WT	SYP5GFP	3660360	72901
0.632017	0.54834	MP	Herm	DLW241	2023_04_05_DLW241_herm_01005_Statistics	45.81	WT	SYP5GFP	3462310	75579.8
0.5917	0.498855	MP	Herm	DLW241	2023_04_05_DLW241_herm_01005_Statistics	49.25	WT	SYP5GFP	3865980	78497.1
0.538322	0.43334	MP	Herm	DLW241	2023_04_05_DLW241_herm_01005_Statistics	35.4	WT	SYP5GFP	2812790	79457.3
0.652842	0.573901	MP	Herm	DLW241	2023_04_05_DLW241_herm_01005_Statistics	54.3	WT	SYP5GFP	4707500	86694.3
0.792577	0.745411	LP	Herm	DLW241	2023_04_05_DLW241_herm_01005_Statistics	66.95	WT	SYP5GFP	7102810	106091
0.821449	0.780848	LP	Herm	DLW241	2023_04_05_DLW241_herm_01005_Statistics	68.59	WT	SYP5GFP	7805330	113797
0.728787	0.667115	LP	Herm	DLW241	2023_04_05_DLW241_herm_01005_Statistics	49.27	WT	SYP5GFP	4374830	88793
0.806597	0.762619	LP	Herm	DLW241	2023_04_05_DLW241_herm_01005_Statistics	63.41	WT	SYP5GFP	7041860	111053
0.82746	0.788225	LP	Herm	DLW241	2023_04_05_DLW241_herm_01005_Statistics	37.39	WT	SYP5GFP	4466470	119456
0.783678	0.734488	LP	Herm	DLW241	2023_04_05_DLW241_herm_01005_Statistics	54.44	WT	SYP5GFP	5637340	103551
0.705359	0.63836	MP	Herm	DLW241	2023_04_05_DLW241_herm_01005_Statistics	34.63	WT	SYP5GFP	3440980	99364.1
0.867262	0.837079	LP	Herm	DLW241	2023_04_05_DLW241_herm_01005_Statistics	57.83	WT	SYP5GFP	7307220	126357
0.803547	0.758875	LP	Herm	DLW241	2023_04_05_DLW241_herm_01005_Statistics	51.25	WT	SYP5GFP	5698280	111186
0.883881	0.857476	LP	Herm	DLW241	2023_04_05_DLW241_herm_01005_Statistics	58.91	WT	SYP5GFP	6775090	115007
0.723956	0.661185	MP	Herm	DLW241	2023_04_05_DLW241_herm_01005_Statistics	66.01	WT	SYP5GFP	6221620	94252.7
0.691608	0.621482	MP	Herm	DLW241	2023_04_05_DLW241_herm_01005_Statistics	51.84	WT	SYP5GFP	4774460	92099.9
0.800093	0.754635	LP	Herm	DLW241	2023_04_05_DLW241_herm_01005_Statistics	65.16	WT	SYP5GFP	7347120	112755
0.744259	0.686106	LP	Herm	DLW241	2023_04_05_DLW241_herm_01005_Statistics	58.96	WT	SYP5GFP	5779510	98024.3
0.872246	0.843195	LP	Herm	DLW241	2023_04_05_DLW241_herm_01005_Statistics	58.64	WT	SYP5GFP	6600610	112562
0.823972	0.783945	LP	Herm	DLW241	2023_04_05_DLW241_herm_01005_Statistics	39.98	WT	SYP5GFP	4429320	110788
0.842547	0.806743	LP	Herm	DLW241	2023_04_05_DLW241_herm_01005_Statistics	59.2	WT	SYP5GFP	7188530	121428
0.838464	0.801732	LP	Herm	DLW241	2023_04_05_DLW241_herm_01005_Statistics	57.06	WT	SYP5GFP	6523450	114326
0.860323	0.828562	LP	Herm	DLW241	2023_04_05_DLW241_herm_01005_Statistics	64.73	WT	SYP5GFP	7843810	121177
0.704696	0.637546	MP	Herm	DLW241	2023_04_05_DLW241_herm_01005_Statistics	58.82	WT	SYP5GFP	5475670	93092
0.722783	0.659746	MP	Herm	DLW241	2023_04_05_DLW241_herm_01005_Statistics	58.59	WT	SYP5GFP	5847670	99806.6
0.748013	0.690713	LP	Herm	DLW241	2023_04_05_DLW241_herm_01005_Statistics	42.87	WT	SYP5GFP	4188190	97695.1
0.764874	0.711408	LP	Herm	DLW241	2023_04_05_DLW241_herm_01005_Statistics	60.06	WT	SYP5GFP	6289920	104727
0.95955	0.950351	LP	Herm	DLW241	2023_04_05_DLW241_herm_01005_Statistics	72.91	WT	SYP5GFP	8669380	118905
0.979965	0.975409	LP	Herm	DLW241	2023_04_05_DLW241_herm_01005_Statistics	73.91	WT	SYP5GFP	8758360	118500
0.997396	0.996803	LP	Herm	DLW241	2023_04_05_DLW241_herm_01005_Statistics	67.69	WT	SYP5GFP	8289020	122456
0.968179	0.960944	LP	Herm	DLW241	2023_04_05_DLW241_herm_01005_Statistics	70.23	WT	SYP5GFP	8307410	118289
0.932391	0.917017	LP	Herm	DLW241	2023_04_05_DLW241_herm_01005_Statistics	74.44	WT	SYP5GFP	8948370	120209
0.905942	0.884554	LP	Herm	DLW241	2023_04_05_DLW241_herm_01005_Statistics	61.93	WT	SYP5GFP	7234770	116822
0.979406	0.974723	LP	Herm	DLW241	2023_04_05_DLW241_herm_01005_Statistics	69.59	WT	SYP5GFP	8364270	120194
0.953608	0.943059	LP	Herm	DLW241	2023_04_05_DLW241_herm_01005_Statistics	74.34	WT	SYP5GFP	7969020	107197
1	1	LP	Herm	DLW241	2023_04_05_DLW241_herm_01005_Statistics	75.32	WT	SYP5GFP	8190740	108746
1	1	LP	Herm	DLW241	2023_04_05_DLW241_herm_01005_Statistics	67.71	WT	SYP5GFP	8296560	122531
0.144329	-0.0645962	TZ	Herm	DLW241	2023_04_05_DLW241_herm_01006_Statistics	7.27	WT	SYP5GFP	510636	70238.8
0.174129	-0.0275205	TZ	Herm	DLW241	2023_04_05_DLW241_herm_01006_Statistics	6.27	WT	SYP5GFP	433852	69194.9
0.108632	-0.10901	TZ	Herm	DLW241	2023_04_05_DLW241_herm_01006_Statistics	8.29	WT	SYP5GFP	586966	70804.1
0.18486	-0.0141687	TZ	Herm	DLW241	2023_04_05_DLW241_herm_01006_Statistics	7.74	WT	SYP5GFP	550952	71182.4
0.157041	-0.0487807	TZ	Herm	DLW241	2023_04_05_DLW241_herm_01006_Statistics	10.3	WT	SYP5GFP	723346	70227.8
0.066063	-0.161972	TZ	Herm	DLW241	2023_04_05_DLW241_herm_01006_Statistics	6.14	WT	SYP5GFP	430443	70104.7
0.0319982	-0.204354	TZ	Herm	DLW241	2023_04_05_DLW241_herm_01006_Statistics	4.46	WT	SYP5GFP	295644	66287.9
0.118572	-0.0966417	TZ	Herm	DLW241	2023_04_05_DLW241_herm_01006_Statistics	6.45	WT	SYP5GFP	457650	70953.5
0.193215	-0.0037738	TZ	Herm	DLW241	2023_04_05_DLW241_herm_01006_Statistics	2.93	WT	SYP5GFP	212192	72420.5
0.144573	-0.0642926	TZ	Herm	DLW241	2023_04_05_DLW241_herm_01006_Statistics	9.53	WT	SYP5GFP	688059	72199.3
0.162689	-0.041753	TZ	Herm	DLW241	2023_04_05_DLW241_herm_01006_Statistics	4.33	WT	SYP5GFP	300269	69346.2
0.122462	-0.0918029	TZ	Herm	DLW241	2023_04_05_DLW241_herm_01006_Statistics	7.87	WT	SYP5GFP	539773	68586.1
0.0183569	-0.221326	TZ	Herm	DLW241	2023_04_05_DLW241_herm_01006_Statistics	4.55	WT	SYP5GFP	294728	64775.4
0.182483	-0.0171258	TZ	Herm	DLW241	2023_04_05_DLW241_herm_01006_Statistics	7.47	WT	SYP5GFP	525319	70323.8
0.0680781	-0.159465	TZ	Herm	DLW241	2023_04_05_DLW241_herm_01006_Statistics	4.2	WT	SYP5GFP	279658	66585.2
0.0404898	-0.193789	TZ	Herm	DLW241	2023_04_05_DLW241_herm_01006_Statistics	4.98	WT	SYP5GFP	316158	63485.5
0.199043	0.00347673	EP	Herm	DLW241	2023_04_05_DLW241_herm_01006_Statistics	7.96	WT	SYP5GFP	553668	69556.3
0.310846	0.142578	EP	Herm	DLW241	2023_04_05_DLW241_herm_01006_Statistics	8.98	WT	SYP5GFP	645863	71922.4
0.209671	0.0166997	EP	Herm	DLW241	2023_04_05_DLW241_herm_01006_Statistics	9.77	WT	SYP5GFP	699930	71640.7
0.198762	0.00312736	EP	Herm	DLW241	2023_04_05_DLW241_herm_01006_Statistics	3.96	WT	SYP5GFP	328094	82852
0.284833	0.110214	EP	Herm	DLW241	2023_04_05_DLW241_herm_01006_Statistics	14.04	WT	SYP5GFP	1043630	74332.6
0.23534	0.0486365	EP	Herm	DLW241	2023_04_05_DLW241_herm_01006_Statistics	6.56	WT	SYP5GFP	473530	72184.5
0.213519	0.021488	EP	Herm	DLW241	2023_04_05_DLW241_herm_01006_Statistics	5.98	WT	SYP5GFP	419680	70180.6
0.285331	0.110834	EP	Herm	DLW241	2023_04_05_DLW241_herm_01006_Statistics	14.07	WT	SYP5GFP	1032630	73392.3
0.253905	0.0717347	EP	Herm	DLW241	2023_04_05_DLW241_herm_01006_Statistics	9.97	WT	SYP5GFP	741863	74409.5
0.329618	0.165934	EP	Herm	DLW241	2023_04_05_DLW241_herm_01006_Statistics	21.42	WT	SYP5GFP	1774580	82846.9
0.206395	0.0126244	EP	Herm	DLW241	2023_04_05_DLW241_herm_01006_Statistics	6.16	WT	SYP5GFP	427655	69424.5
0.237623	0.0514773	EP	Herm	DLW241	2023_04_05_DLW241_herm_01006_Statistics	6.32	WT	SYP5GFP	422467	66846
0.271007	0.0930128	EP	Herm	DLW241	2023_04_05_DLW241_herm_01006_Statistics	12.57	WT	SYP5GFP	932882	74215
0.322559	0.157152	EP	Herm	DLW241	2023_04_05_DLW241_herm_01006_Statistics	18.81	WT	SYP5GFP	1478720	78613.5
0.313041	0.14531	EP	Herm	DLW241	2023_04_05_DLW241_herm_01006_Statistics	16.26	WT	SYP5GFP	1262930	77671
0.331937	0.168819	EP	Herm	DLW241	2023_04_05_DLW241_herm_01006_Statistics	15.54	WT	SYP5GFP	1216890	78306.9
0.293377	0.120845	EP	Herm	DLW241	2023_04_05_DLW241_herm_01006_Statistics	14.74	WT	SYP5GFP	1129020	76595.7
0.317931	0.151394	EP	Herm	DLW241	2023_04_05_DLW241_herm_01006_Statistics	17.14	WT	SYP5GFP	1327730	77463.8
0.33772	0.176014	EP	Herm	DLW241	2023_04_05_DLW241_herm_01006_Statistics	18.78	WT	SYP5GFP	1504900	80133.1
0.389187	0.240047	EP	Herm	DLW241	2023_04_05_DLW241_herm_01006_Statistics	16.44	WT	SYP5GFP	1325240	80610.7
0.408563	0.264154	EP	Herm	DLW241	2023_04_05_DLW241_herm_01006_Statistics	13.94	WT	SYP5GFP	1115070	79990.7
0.378081	0.22623	EP	Herm	DLW241	2023_04_05_DLW241_herm_01006_Statistics	16.07	WT	SYP5GFP	1279540	79622.9
0.455345	0.322359	EP	Herm	DLW241	2023_04_05_DLW241_herm_01006_Statistics	16.67	WT	SYP5GFP	1378960	82721.1
0.393488	0.245399	EP	Herm	DLW241	2023_04_05_DLW241_herm_01006_Statistics	21.7	WT	SYP5GFP	1818610	83806.9
0.419178	0.277361	EP	Herm	DLW241	2023_04_05_DLW241_herm_01006_Statistics	19.13	WT	SYP5GFP	1649600	86231.1
0.341271	0.180432	EP	Herm	DLW241	2023_04_05_DLW241_herm_01006_Statistics	16.45	WT	SYP5GFP	1307660	79493
0.515356	0.397023	MP	Herm	DLW241	2023_04_05_DLW241_herm_01006_Statistics	28.58	WT	SYP5GFP	2605600	91168.6
0.385393	0.235327	EP	Herm	DLW241	2023_04_05_DLW241_herm_01006_Statistics	8.35	WT	SYP5GFP	716749	85838.2
0.441079	0.30461	EP	Herm	DLW241	2023_04_05_DLW241_herm_01006_Statistics	26.49	WT	SYP5GFP	2172770	82022.3
0.502295	0.380772	MP	Herm	DLW241	2023_04_05_DLW241_herm_01006_Statistics	29.01	WT	SYP5GFP	2683280	92495
0.40793	0.263367	EP	Herm	DLW241	2023_04_05_DLW241_herm_01006_Statistics	21.09	WT	SYP5GFP	1710900	81123.8
0.426898	0.286966	EP	Herm	DLW241	2023_04_05_DLW241_herm_01006_Statistics	13.35	WT	SYP5GFP	1072100	80307.1
0.353894	0.196137	EP	Herm	DLW241	2023_04_05_DLW241_herm_01006_Statistics	19.73	WT	SYP5GFP	1572760	79714.1
0.488448	0.363545	MP	Herm	DLW241	2023_04_05_DLW241_herm_01006_Statistics	24.82	WT	SYP5GFP	2272820	91572.1
0.525106	0.409154	MP	Herm	DLW241	2023_04_05_DLW241_herm_01006_Statistics	23.44	WT	SYP5GFP	2076440	88585.3
0.393677	0.245634	EP	Herm	DLW241	2023_04_05_DLW241_herm_01006_Statistics	18.07	WT	SYP5GFP	1398930	77417.3
0.466676	0.336456	MP	Herm	DLW241	2023_04_05_DLW241_herm_01006_Statistics	39.93	WT	SYP5GFP	3250090	81394.7
0.45256	0.318895	EP	Herm	DLW241	2023_04_05_DLW241_herm_01006_Statistics	22.73	WT	SYP5GFP	1951450	85853.5
0.368935	0.214851	EP	Herm	DLW241	2023_04_05_DLW241_herm_01006_Statistics	19.29	WT	SYP5GFP	1546480	80170
0.415123	0.272316	EP	Herm	DLW241	2023_04_05_DLW241_herm_01006_Statistics	21.2	WT	SYP5GFP	1674030	78963.7
0.399172	0.252471	EP	Herm	DLW241	2023_04_05_DLW241_herm_01006_Statistics	15.67	WT	SYP5GFP	1225600	78213.1
0.471985	0.343062	MP	Herm	DLW241	2023_04_05_DLW241_herm_01006_Statistics	26.79	WT	SYP5GFP	2327880	86893.6
0.43683	0.299324	EP	Herm	DLW241	2023_04_05_DLW241_herm_01006_Statistics	17.4	WT	SYP5GFP	1429710	82167.2
0.489648	0.365038	MP	Herm	DLW241	2023_04_05_DLW241_herm_01006_Statistics	24.96	WT	SYP5GFP	2179460	87318.1
0.420934	0.279546	EP	Herm	DLW241	2023_04_05_DLW241_herm_01006_Statistics	22.86	WT	SYP5GFP	1915600	83797
0.456215	0.323442	EP	Herm	DLW241	2023_04_05_DLW241_herm_01006_Statistics	22.39	WT	SYP5GFP	1877450	83852.2
0.5093	0.389488	MP	Herm	DLW241	2023_04_05_DLW241_herm_01006_Statistics	31.77	WT	SYP5GFP	2819440	88745.4
0.481006	0.354285	MP	Herm	DLW241	2023_04_05_DLW241_herm_01006_Statistics	23.95	WT	SYP5GFP	1995840	83333.6
0.441249	0.304822	EP	Herm	DLW241	2023_04_05_DLW241_herm_01006_Statistics	19.3	WT	SYP5GFP	1668220	86436.3
0.495289	0.372056	MP	Herm	DLW241	2023_04_05_DLW241_herm_01006_Statistics	25.18	WT	SYP5GFP	2249320	89329.6
0.519512	0.402193	MP	Herm	DLW241	2023_04_05_DLW241_herm_01006_Statistics	25.2	WT	SYP5GFP	2546210	101040
0.462421	0.331163	EP	Herm	DLW241	2023_04_05_DLW241_herm_01006_Statistics	27.82	WT	SYP5GFP	2262780	81336.4
0.511667	0.392433	MP	Herm	DLW241	2023_04_05_DLW241_herm_01006_Statistics	18.63	WT	SYP5GFP	1570760	84313.5
0.491636	0.367511	MP	Herm	DLW241	2023_04_05_DLW241_herm_01006_Statistics	27.57	WT	SYP5GFP	2311240	83831.7
0.348885	0.189906	EP	Herm	DLW241	2023_04_05_DLW241_herm_01006_Statistics	12.79	WT	SYP5GFP	1004560	78542.6
0.534026	0.420251	MP	Herm	DLW241	2023_04_05_DLW241_herm_01006_Statistics	27.19	WT	SYP5GFP	2527070	92941.2
0.552049	0.442675	MP	Herm	DLW241	2023_04_05_DLW241_herm_01006_Statistics	23.85	WT	SYP5GFP	2196800	92109
0.545273	0.434244	MP	Herm	DLW241	2023_04_05_DLW241_herm_01006_Statistics	24.88	WT	SYP5GFP	2446030	98313.1
0.534733	0.421131	MP	Herm	DLW241	2023_04_05_DLW241_herm_01006_Statistics	25.72	WT	SYP5GFP	2366390	92005.8
0.59217	0.492592	MP	Herm	DLW241	2023_04_05_DLW241_herm_01006_Statistics	19.05	WT	SYP5GFP	1876550	98506.6
0.558103	0.450207	MP	Herm	DLW241	2023_04_05_DLW241_herm_01006_Statistics	19.01	WT	SYP5GFP	1622930	85372.4
0.556888	0.448695	MP	Herm	DLW241	2023_04_05_DLW241_herm_01006_Statistics	22.97	WT	SYP5GFP	2144760	93372.2
0.533368	0.419433	MP	Herm	DLW241	2023_04_05_DLW241_herm_01006_Statistics	29.38	WT	SYP5GFP	2628780	89475.2
0.577683	0.474568	MP	Herm	DLW241	2023_04_05_DLW241_herm_01006_Statistics	16.29	WT	SYP5GFP	1490530	91499.7
0.634787	0.545615	MP	Herm	DLW241	2023_04_05_DLW241_herm_01006_Statistics	38.06	WT	SYP5GFP	4291230	112749
0.685724	0.608988	MP	Herm	DLW241	2023_04_05_DLW241_herm_01006_Statistics	29.29	WT	SYP5GFP	3322550	113436
0.712202	0.641932	MP	Herm	DLW241	2023_04_05_DLW241_herm_01006_Statistics	56.96	WT	SYP5GFP	6322110	110992
0.596824	0.498383	MP	Herm	DLW241	2023_04_05_DLW241_herm_01006_Statistics	18.97	WT	SYP5GFP	1760240	92790.7
0.575328	0.471638	MP	Herm	DLW241	2023_04_05_DLW241_herm_01006_Statistics	24.58	WT	SYP5GFP	2218990	90276.2
0.613103	0.518636	MP	Herm	DLW241	2023_04_05_DLW241_herm_01006_Statistics	29.86	WT	SYP5GFP	3185630	106686
0.629337	0.538833	MP	Herm	DLW241	2023_04_05_DLW241_herm_01006_Statistics	25.78	WT	SYP5GFP	2758540	107003
0.593641	0.494422	MP	Herm	DLW241	2023_04_05_DLW241_herm_01006_Statistics	16.1	WT	SYP5GFP	1503510	93385.7
0.635533	0.546543	MP	Herm	DLW241	2023_04_05_DLW241_herm_01006_Statistics	47.88	WT	SYP5GFP	5840400	121980
0.673984	0.594382	MP	Herm	DLW241	2023_04_05_DLW241_herm_01006_Statistics	40.75	WT	SYP5GFP	4448510	109166
0.550024	0.440155	MP	Herm	DLW241	2023_04_05_DLW241_herm_01006_Statistics	28.11	WT	SYP5GFP	2619590	93190.7
0.650206	0.564799	MP	Herm	DLW241	2023_04_05_DLW241_herm_01006_Statistics	42.84	WT	SYP5GFP	4839390	112964
0.702321	0.629638	MP	Herm	DLW241	2023_04_05_DLW241_herm_01006_Statistics	41.72	WT	SYP5GFP	4702980	112727
0.658612	0.575256	MP	Herm	DLW241	2023_04_05_DLW241_herm_01006_Statistics	38.46	WT	SYP5GFP	4299360	111788
0.640184	0.552329	MP	Herm	DLW241	2023_04_05_DLW241_herm_01006_Statistics	33.12	WT	SYP5GFP	3455850	104343
0.559306	0.451704	MP	Herm	DLW241	2023_04_05_DLW241_herm_01006_Statistics	16.66	WT	SYP5GFP	1490830	89485.6
0.576505	0.473103	MP	Herm	DLW241	2023_04_05_DLW241_herm_01006_Statistics	15.8	WT	SYP5GFP	1398920	88539.2
0.660841	0.57803	MP	Herm	DLW241	2023_04_05_DLW241_herm_01006_Statistics	48.63	WT	SYP5GFP	5513110	113368
0.592918	0.493522	MP	Herm	DLW241	2023_04_05_DLW241_herm_01006_Statistics	32.83	WT	SYP5GFP	3081580	93864.8
0.597991	0.499834	MP	Herm	DLW241	2023_04_05_DLW241_herm_01006_Statistics	18.67	WT	SYP5GFP	1693420	90702.7
0.612606	0.518018	MP	Herm	DLW241	2023_04_05_DLW241_herm_01006_Statistics	35.84	WT	SYP5GFP	3556460	99231.6
0.646408	0.560073	MP	Herm	DLW241	2023_04_05_DLW241_herm_01006_Statistics	20.7	WT	SYP5GFP	2172220	104938
0.684227	0.607126	MP	Herm	DLW241	2023_04_05_DLW241_herm_01006_Statistics	44.25	WT	SYP5GFP	5260460	118880
0.708614	0.637468	MP	Herm	DLW241	2023_04_05_DLW241_herm_01006_Statistics	30.69	WT	SYP5GFP	3442890	112183
0.735895	0.671409	LP	Herm	DLW241	2023_04_05_DLW241_herm_01006_Statistics	46.87	WT	SYP5GFP	5694040	121486
0.698235	0.624554	MP	Herm	DLW241	2023_04_05_DLW241_herm_01006_Statistics	23.22	WT	SYP5GFP	2683910	115586
0.66651	0.585084	MP	Herm	DLW241	2023_04_05_DLW241_herm_01006_Statistics	24.53	WT	SYP5GFP	2768130	112847
0.683483	0.6062	MP	Herm	DLW241	2023_04_05_DLW241_herm_01006_Statistics	36.65	WT	SYP5GFP	4275430	116656
0.719144	0.650569	MP	Herm	DLW241	2023_04_05_DLW241_herm_01006_Statistics	40.79	WT	SYP5GFP	4890100	119885
0.700258	0.627071	MP	Herm	DLW241	2023_04_05_DLW241_herm_01006_Statistics	41.61	WT	SYP5GFP	4854170	116659
0.739517	0.675916	LP	Herm	DLW241	2023_04_05_DLW241_herm_01006_Statistics	58.45	WT	SYP5GFP	7492070	128179
0.730443	0.664627	MP	Herm	DLW241	2023_04_05_DLW241_herm_01006_Statistics	42.17	WT	SYP5GFP	5215520	123678
0.761999	0.703887	LP	Herm	DLW241	2023_04_05_DLW241_herm_01006_Statistics	49.26	WT	SYP5GFP	6270380	127292
0.7906	0.739471	LP	Herm	DLW241	2023_04_05_DLW241_herm_01006_Statistics	34.58	WT	SYP5GFP	4778220	138179
0.774504	0.719445	LP	Herm	DLW241	2023_04_05_DLW241_herm_01006_Statistics	53.54	WT	SYP5GFP	6687660	124910
0.841157	0.802373	LP	Herm	DLW241	2023_04_05_DLW241_herm_01006_Statistics	53.43	WT	SYP5GFP	6988380	130795
0.797773	0.748397	LP	Herm	DLW241	2023_04_05_DLW241_herm_01006_Statistics	52.12	WT	SYP5GFP	6934120	133041
0.771654	0.7159	LP	Herm	DLW241	2023_04_05_DLW241_herm_01006_Statistics	49.93	WT	SYP5GFP	6483500	129852
0.816014	0.771091	LP	Herm	DLW241	2023_04_05_DLW241_herm_01006_Statistics	51.52	WT	SYP5GFP	6865560	133260
0.826506	0.784145	LP	Herm	DLW241	2023_04_05_DLW241_herm_01006_Statistics	56.74	WT	SYP5GFP	7737730	136372
0.884849	0.856734	LP	Herm	DLW241	2023_04_05_DLW241_herm_01006_Statistics	50.76	WT	SYP5GFP	7413060	146041
0.855839	0.820639	LP	Herm	DLW241	2023_04_05_DLW241_herm_01006_Statistics	61.36	WT	SYP5GFP	7587640	123658
0.813099	0.767464	LP	Herm	DLW241	2023_04_05_DLW241_herm_01006_Statistics	55.22	WT	SYP5GFP	7347900	133066
0.759389	0.70064	LP	Herm	DLW241	2023_04_05_DLW241_herm_01006_Statistics	44.76	WT	SYP5GFP	5944820	132815
0.910607	0.88878	LP	Herm	DLW241	2023_04_05_DLW241_herm_01006_Statistics	53.3	WT	SYP5GFP	6750460	126650
0.781084	0.727633	LP	Herm	DLW241	2023_04_05_DLW241_herm_01006_Statistics	50.87	WT	SYP5GFP	6834700	134356
0.864979	0.832012	LP	Herm	DLW241	2023_04_05_DLW241_herm_01006_Statistics	57.09	WT	SYP5GFP	7147200	125192
0.837892	0.798311	LP	Herm	DLW241	2023_04_05_DLW241_herm_01006_Statistics	56.03	WT	SYP5GFP	7358310	131328
0.798848	0.749734	LP	Herm	DLW241	2023_04_05_DLW241_herm_01006_Statistics	43.39	WT	SYP5GFP	5913400	136285
0.943037	0.929128	LP	Herm	DLW241	2023_04_05_DLW241_herm_01006_Statistics	59.26	WT	SYP5GFP	8010070	135168
0.848174	0.811104	LP	Herm	DLW241	2023_04_05_DLW241_herm_01006_Statistics	55.5	WT	SYP5GFP	7267390	130944
0.89123	0.864673	LP	Herm	DLW241	2023_04_05_DLW241_herm_01006_Statistics	55.16	WT	SYP5GFP	6943070	125871
0.823708	0.780663	LP	Herm	DLW241	2023_04_05_DLW241_herm_01006_Statistics	52.61	WT	SYP5GFP	7236820	137556
0.923315	0.904592	LP	Herm	DLW241	2023_04_05_DLW241_herm_01006_Statistics	57.34	WT	SYP5GFP	6741500	117571
0.989742	0.987238	LP	Herm	DLW241	2023_04_05_DLW241_herm_01006_Statistics	54.07	WT	SYP5GFP	7059400	130560
0.807756	0.760817	LP	Herm	DLW241	2023_04_05_DLW241_herm_01006_Statistics	57.39	WT	SYP5GFP	7684440	133899
0.962662	0.953546	LP	Herm	DLW241	2023_04_05_DLW241_herm_01006_Statistics	56.4	WT	SYP5GFP	6835630	121199
0.833567	0.79293	LP	Herm	DLW241	2023_04_05_DLW241_herm_01006_Statistics	55.65	WT	SYP5GFP	7629640	137100
0.873343	0.842417	LP	Herm	DLW241	2023_04_05_DLW241_herm_01006_Statistics	56.87	WT	SYP5GFP	7272160	127873
0.949823	0.937572	LP	Herm	DLW241	2023_04_05_DLW241_herm_01006_Statistics	58.61	WT	SYP5GFP	6938760	118389
0.990573	0.988271	LP	Herm	DLW241	2023_04_05_DLW241_herm_01006_Statistics	56.56	WT	SYP5GFP	7059800	124820
0.921743	0.902635	LP	Herm	DLW241	2023_04_05_DLW241_herm_01006_Statistics	55.69	WT	SYP5GFP	7175840	128853
0.858064	0.823408	LP	Herm	DLW241	2023_04_05_DLW241_herm_01006_Statistics	51.42	WT	SYP5GFP	6839710	133017
0.971161	0.964119	LP	Herm	DLW241	2023_04_05_DLW241_herm_01006_Statistics	58.85	WT	SYP5GFP	7219220	122672
0.985324	0.981741	LP	Herm	DLW241	2023_04_05_DLW241_herm_01006_Statistics	53.98	WT	SYP5GFP	6698540	124093
0.996866	0.996101	LP	Herm	DLW241	2023_04_05_DLW241_herm_01006_Statistics	58.23	WT	SYP5GFP	7481640	128484
0.763515	0.705774	LP	Herm	DLW241	2023_04_05_DLW241_herm_01006_Statistics	51.42	WT	SYP5GFP	6521410	126826
0.752914	0.692585	LP	Herm	DLW241	2023_04_05_DLW241_herm_01006_Statistics	47.8	WT	SYP5GFP	6056230	126699
0.791691	0.74083	LP	Herm	DLW241	2023_04_05_DLW241_herm_01006_Statistics	40.19	WT	SYP5GFP	5375590	133754
0.774757	0.71976	LP	Herm	DLW241	2023_04_05_DLW241_herm_01006_Statistics	46.66	WT	SYP5GFP	6212290	133140
0.897552	0.872538	LP	Herm	DLW241	2023_04_05_DLW241_herm_01006_Statistics	53.79	WT	SYP5GFP	6847060	127292
0.152963	-0.0593842	TZ	Herm	DLW241	2023_04_05_DLW241_herm_01007_Statistics	13.44	WT	SYP5GFP	868628	64630.1
0.13553	-0.081187	TZ	Herm	DLW241	2023_04_05_DLW241_herm_01007_Statistics	11.64	WT	SYP5GFP	730006	62715.3
0.117772	-0.103397	TZ	Herm	DLW241	2023_04_05_DLW241_herm_01007_Statistics	6.47	WT	SYP5GFP	401110	61995.4
0.0822415	-0.147835	TZ	Herm	DLW241	2023_04_05_DLW241_herm_01007_Statistics	8.22	WT	SYP5GFP	491886	59840.1
0.127478	-0.0912585	TZ	Herm	DLW241	2023_04_05_DLW241_herm_01007_Statistics	7.79	WT	SYP5GFP	488366	62691.4
0.160657	-0.0497605	TZ	Herm	DLW241	2023_04_05_DLW241_herm_01007_Statistics	13.24	WT	SYP5GFP	839200	63383.7
0.193255	-0.00899153	TZ	Herm	DLW241	2023_04_05_DLW241_herm_01007_Statistics	11.21	WT	SYP5GFP	747475	66679.3
0.0695614	-0.163694	TZ	Herm	DLW241	2023_04_05_DLW241_herm_01007_Statistics	10.43	WT	SYP5GFP	614361	58903.3
0.0549305	-0.181993	TZ	Herm	DLW241	2023_04_05_DLW241_herm_01007_Statistics	7.42	WT	SYP5GFP	465357	62716.6
0.139407	-0.0763378	TZ	Herm	DLW241	2023_04_05_DLW241_herm_01007_Statistics	14.28	WT	SYP5GFP	914028	64007.6
0.176464	-0.0299913	TZ	Herm	DLW241	2023_04_05_DLW241_herm_01007_Statistics	12.18	WT	SYP5GFP	799290	65623.2
0.0362633	-0.20534	TZ	Herm	DLW241	2023_04_05_DLW241_herm_01007_Statistics	7.77	WT	SYP5GFP	450535	57983.9
0.0958117	-0.130863	TZ	Herm	DLW241	2023_04_05_DLW241_herm_01007_Statistics	8.68	WT	SYP5GFP	553764	63797.7
0.119103	-0.101732	TZ	Herm	DLW241	2023_04_05_DLW241_herm_01007_Statistics	9.69	WT	SYP5GFP	642109	66265.1
0.15643	-0.0550478	TZ	Herm	DLW241	2023_04_05_DLW241_herm_01007_Statistics	12.4	WT	SYP5GFP	782727	63123.1
0.0751021	-0.156764	TZ	Herm	DLW241	2023_04_05_DLW241_herm_01007_Statistics	9.03	WT	SYP5GFP	544222	60268.2
0.184201	-0.020315	TZ	Herm	DLW241	2023_04_05_DLW241_herm_01007_Statistics	13.84	WT	SYP5GFP	900556	65069.1
0.138898	-0.0769751	TZ	Herm	DLW241	2023_04_05_DLW241_herm_01007_Statistics	8.64	WT	SYP5GFP	554195	64142.9
0.1984	-0.00255614	TZ	Herm	DLW241	2023_04_05_DLW241_herm_01007_Statistics	10.28	WT	SYP5GFP	690415	67161
0.168926	-0.0394189	TZ	Herm	DLW241	2023_04_05_DLW241_herm_01007_Statistics	7.49	WT	SYP5GFP	499392	66674.5
0.150705	-0.0622085	TZ	Herm	DLW241	2023_04_05_DLW241_herm_01007_Statistics	11.31	WT	SYP5GFP	722884	63915.5
0.181238	-0.0240209	TZ	Herm	DLW241	2023_04_05_DLW241_herm_01007_Statistics	13.99	WT	SYP5GFP	889769	63600.4
0.101272	-0.124034	TZ	Herm	DLW241	2023_04_05_DLW241_herm_01007_Statistics	5.54	WT	SYP5GFP	359438	64880.5
0.130435	-0.0875597	TZ	Herm	DLW241	2023_04_05_DLW241_herm_01007_Statistics	5.87	WT	SYP5GFP	371663	63315.7
0.162459	-0.0475073	TZ	Herm	DLW241	2023_04_05_DLW241_herm_01007_Statistics	10.37	WT	SYP5GFP	667717	64389.3
0.116325	-0.105207	TZ	Herm	DLW241	2023_04_05_DLW241_herm_01007_Statistics	5.35	WT	SYP5GFP	343158	64141.7
0.413389	0.26633	EP	Herm	DLW241	2023_04_05_DLW241_herm_01007_Statistics	19.51	WT	SYP5GFP	1453650	74507.9
0.383452	0.228888	EP	Herm	DLW241	2023_04_05_DLW241_herm_01007_Statistics	16.21	WT	SYP5GFP	1201260	74106.1
0.359561	0.199007	EP	Herm	DLW241	2023_04_05_DLW241_herm_01007_Statistics	27.06	WT	SYP5GFP	1917350	70855.5
0.401514	0.251477	EP	Herm	DLW241	2023_04_05_DLW241_herm_01007_Statistics	15.11	WT	SYP5GFP	1109200	73408.3
0.443033	0.303405	EP	Herm	DLW241	2023_04_05_DLW241_herm_01007_Statistics	31.58	WT	SYP5GFP	2729990	86446.8
0.339905	0.174424	EP	Herm	DLW241	2023_04_05_DLW241_herm_01007_Statistics	21.36	WT	SYP5GFP	1544850	72324.4
0.417868	0.271931	EP	Herm	DLW241	2023_04_05_DLW241_herm_01007_Statistics	26.03	WT	SYP5GFP	2063500	79273.9
0.360586	0.200289	EP	Herm	DLW241	2023_04_05_DLW241_herm_01007_Statistics	16.1	WT	SYP5GFP	1221370	75861.5
0.39198	0.239554	EP	Herm	DLW241	2023_04_05_DLW241_herm_01007_Statistics	29.69	WT	SYP5GFP	2222700	74863.6
0.321655	0.151598	EP	Herm	DLW241	2023_04_05_DLW241_herm_01007_Statistics	19.1	WT	SYP5GFP	1385160	72521.5
0.340598	0.17529	EP	Herm	DLW241	2023_04_05_DLW241_herm_01007_Statistics	22.37	WT	SYP5GFP	1637180	73186.4
0.362784	0.203038	EP	Herm	DLW241	2023_04_05_DLW241_herm_01007_Statistics	19.41	WT	SYP5GFP	1542190	79453.4
0.39506	0.243405	EP	Herm	DLW241	2023_04_05_DLW241_herm_01007_Statistics	19.95	WT	SYP5GFP	1533580	76871.2
0.237094	0.0458387	EP	Herm	DLW241	2023_04_05_DLW241_herm_01007_Statistics	24.55	WT	SYP5GFP	1708370	69587.4
0.447656	0.309187	EP	Herm	DLW241	2023_04_05_DLW241_herm_01007_Statistics	31.43	WT	SYP5GFP	2530600	80515.4
0.276619	0.0952712	EP	Herm	DLW241	2023_04_05_DLW241_herm_01007_Statistics	19.9	WT	SYP5GFP	1404170	70561.3
0.256659	0.0703085	EP	Herm	DLW241	2023_04_05_DLW241_herm_01007_Statistics	19.3	WT	SYP5GFP	1355620	70239.4
0.429697	0.286725	EP	Herm	DLW241	2023_04_05_DLW241_herm_01007_Statistics	30.11	WT	SYP5GFP	2442850	81130.9
0.315534	0.143943	EP	Herm	DLW241	2023_04_05_DLW241_herm_01007_Statistics	22.12	WT	SYP5GFP	1656510	74887.4
0.211122	0.0133546	EP	Herm	DLW241	2023_04_05_DLW241_herm_01007_Statistics	22.98	WT	SYP5GFP	1574630	68521.8
0.402586	0.252818	EP	Herm	DLW241	2023_04_05_DLW241_herm_01007_Statistics	14.45	WT	SYP5GFP	1139240	78840.1
0.293004	0.115765	EP	Herm	DLW241	2023_04_05_DLW241_herm_01007_Statistics	16.1	WT	SYP5GFP	1138290	70701.2
0.384924	0.230729	EP	Herm	DLW241	2023_04_05_DLW241_herm_01007_Statistics	22.85	WT	SYP5GFP	1696700	74253.8
0.362023	0.202086	EP	Herm	DLW241	2023_04_05_DLW241_herm_01007_Statistics	21.91	WT	SYP5GFP	1643840	75026.9
0.231625	0.0389981	EP	Herm	DLW241	2023_04_05_DLW241_herm_01007_Statistics	21.45	WT	SYP5GFP	1470030	68532.9
0.261534	0.0764057	EP	Herm	DLW241	2023_04_05_DLW241_herm_01007_Statistics	20.98	WT	SYP5GFP	1468640	70001.9
0.302425	0.127547	EP	Herm	DLW241	2023_04_05_DLW241_herm_01007_Statistics	20.07	WT	SYP5GFP	1451960	72344.8
0.322097	0.152151	EP	Herm	DLW241	2023_04_05_DLW241_herm_01007_Statistics	18.92	WT	SYP5GFP	1426020	75371
0.245068	0.0558113	EP	Herm	DLW241	2023_04_05_DLW241_herm_01007_Statistics	16.59	WT	SYP5GFP	1144260	68972.9
0.439706	0.299244	EP	Herm	DLW241	2023_04_05_DLW241_herm_01007_Statistics	25.96	WT	SYP5GFP	2055370	79174.5
0.3668	0.208061	EP	Herm	DLW241	2023_04_05_DLW241_herm_01007_Statistics	21.63	WT	SYP5GFP	1582530	73163.7
0.280388	0.0999859	EP	Herm	DLW241	2023_04_05_DLW241_herm_01007_Statistics	21.72	WT	SYP5GFP	1660250	76438.8
0.413406	0.266351	EP	Herm	DLW241	2023_04_05_DLW241_herm_01007_Statistics	28.67	WT	SYP5GFP	2289910	79871.3
0.337732	0.171706	EP	Herm	DLW241	2023_04_05_DLW241_herm_01007_Statistics	27.18	WT	SYP5GFP	1956790	71993.7
0.209749	0.0116381	EP	Herm	DLW241	2023_04_05_DLW241_herm_01007_Statistics	21.65	WT	SYP5GFP	1462550	67554.3
0.247647	0.0590369	EP	Herm	DLW241	2023_04_05_DLW241_herm_01007_Statistics	6.15	WT	SYP5GFP	450458	73245.2
0.289536	0.111427	EP	Herm	DLW241	2023_04_05_DLW241_herm_01007_Statistics	15.21	WT	SYP5GFP	1078220	70888.9
0.229091	0.0358293	EP	Herm	DLW241	2023_04_05_DLW241_herm_01007_Statistics	18.03	WT	SYP5GFP	1214660	67368.8
0.312747	0.140457	EP	Herm	DLW241	2023_04_05_DLW241_herm_01007_Statistics	21.28	WT	SYP5GFP	1552130	72938.4
0.349804	0.186804	EP	Herm	DLW241	2023_04_05_DLW241_herm_01007_Statistics	20.39	WT	SYP5GFP	1486470	72901.9
0.374058	0.217138	EP	Herm	DLW241	2023_04_05_DLW241_herm_01007_Statistics	19.56	WT	SYP5GFP	1359260	69491.8
0.327176	0.158503	EP	Herm	DLW241	2023_04_05_DLW241_herm_01007_Statistics	20.13	WT	SYP5GFP	1455390	72299.6
0.234733	0.0428848	EP	Herm	DLW241	2023_04_05_DLW241_herm_01007_Statistics	13.81	WT	SYP5GFP	892479	64625.6
0.290758	0.112955	EP	Herm	DLW241	2023_04_05_DLW241_herm_01007_Statistics	22.12	WT	SYP5GFP	1563090	70664.1
0.256269	0.0698203	EP	Herm	DLW241	2023_04_05_DLW241_herm_01007_Statistics	24.31	WT	SYP5GFP	1617130	66521.2
0.312837	0.140569	EP	Herm	DLW241	2023_04_05_DLW241_herm_01007_Statistics	19.08	WT	SYP5GFP	1374750	72051.9
0.43357	0.29157	EP	Herm	DLW241	2023_04_05_DLW241_herm_01007_Statistics	13.19	WT	SYP5GFP	959309	72730
0.359525	0.198962	EP	Herm	DLW241	2023_04_05_DLW241_herm_01007_Statistics	21.92	WT	SYP5GFP	1554660	70924.3
0.238551	0.0476609	EP	Herm	DLW241	2023_04_05_DLW241_herm_01007_Statistics	17.35	WT	SYP5GFP	1107870	63854.2
0.317398	0.146274	EP	Herm	DLW241	2023_04_05_DLW241_herm_01007_Statistics	21.13	WT	SYP5GFP	1394790	66009.9
0.271029	0.0882809	EP	Herm	DLW241	2023_04_05_DLW241_herm_01007_Statistics	22.12	WT	SYP5GFP	1543600	69783
0.293	0.11576	EP	Herm	DLW241	2023_04_05_DLW241_herm_01007_Statistics	16.07	WT	SYP5GFP	1060030	65963.3
0.203919	0.00434595	EP	Herm	DLW241	2023_04_05_DLW241_herm_01007_Statistics	10.9	WT	SYP5GFP	691004	63394.9
0.455758	0.31932	EP	Herm	DLW241	2023_04_05_DLW241_herm_01007_Statistics	30.04	WT	SYP5GFP	2456510	81774.6
0.455758	0.31932	EP	Herm	DLW241	2023_04_05_DLW241_herm_01007_Statistics	34.22	WT	SYP5GFP	2667510	77951.8
0.503775	0.379374	MP	Herm	DLW241	2023_04_05_DLW241_herm_01007_Statistics	30.48	WT	SYP5GFP	2656680	87161.4
0.555506	0.444074	MP	Herm	DLW241	2023_04_05_DLW241_herm_01007_Statistics	35.35	WT	SYP5GFP	3346950	94680.3
0.52865	0.410485	MP	Herm	DLW241	2023_04_05_DLW241_herm_01007_Statistics	43.97	WT	SYP5GFP	3656630	83161.9
0.496523	0.370305	MP	Herm	DLW241	2023_04_05_DLW241_herm_01007_Statistics	37.01	WT	SYP5GFP	2976750	80431
0.471156	0.338578	MP	Herm	DLW241	2023_04_05_DLW241_herm_01007_Statistics	16.57	WT	SYP5GFP	1250690	75479.2
0.599498	0.499095	MP	Herm	DLW241	2023_04_05_DLW241_herm_01007_Statistics	40.45	WT	SYP5GFP	3442870	85114.2
0.521867	0.402002	MP	Herm	DLW241	2023_04_05_DLW241_herm_01007_Statistics	41.77	WT	SYP5GFP	3530640	84525.7
0.547041	0.433487	MP	Herm	DLW241	2023_04_05_DLW241_herm_01007_Statistics	47.14	WT	SYP5GFP	4109500	87176.5
0.484932	0.355807	MP	Herm	DLW241	2023_04_05_DLW241_herm_01007_Statistics	19.74	WT	SYP5GFP	1608510	81484.8
0.510621	0.387936	MP	Herm	DLW241	2023_04_05_DLW241_herm_01007_Statistics	22.2	WT	SYP5GFP	1786050	80452.7
0.596499	0.495344	MP	Herm	DLW241	2023_04_05_DLW241_herm_01007_Statistics	29.11	WT	SYP5GFP	2654220	91179
0.466429	0.332666	EP	Herm	DLW241	2023_04_05_DLW241_herm_01007_Statistics	26.22	WT	SYP5GFP	2105150	80287.9
0.488597	0.360392	MP	Herm	DLW241	2023_04_05_DLW241_herm_01007_Statistics	30.63	WT	SYP5GFP	2649080	86486.5
0.583922	0.479614	MP	Herm	DLW241	2023_04_05_DLW241_herm_01007_Statistics	30.33	WT	SYP5GFP	2948410	97211
0.530523	0.412829	MP	Herm	DLW241	2023_04_05_DLW241_herm_01007_Statistics	27.78	WT	SYP5GFP	2288320	82372.9
0.571917	0.464599	MP	Herm	DLW241	2023_04_05_DLW241_herm_01007_Statistics	34.1	WT	SYP5GFP	2756790	80844.3
0.469174	0.3361	MP	Herm	DLW241	2023_04_05_DLW241_herm_01007_Statistics	37.67	WT	SYP5GFP	2892660	76789.5
0.491561	0.364098	MP	Herm	DLW241	2023_04_05_DLW241_herm_01007_Statistics	24.81	WT	SYP5GFP	1923110	77513.5
0.550505	0.43782	MP	Herm	DLW241	2023_04_05_DLW241_herm_01007_Statistics	25.57	WT	SYP5GFP	2349380	91880.3
0.528432	0.410212	MP	Herm	DLW241	2023_04_05_DLW241_herm_01007_Statistics	26.66	WT	SYP5GFP	2195600	82355.6
0.567684	0.459306	MP	Herm	DLW241	2023_04_05_DLW241_herm_01007_Statistics	38.79	WT	SYP5GFP	3170530	81735.8
0.545011	0.430948	MP	Herm	DLW241	2023_04_05_DLW241_herm_01007_Statistics	30.55	WT	SYP5GFP	2513490	82274.6
0.58726	0.483789	MP	Herm	DLW241	2023_04_05_DLW241_herm_01007_Statistics	29.65	WT	SYP5GFP	2621130	88402.4
0.480225	0.349921	MP	Herm	DLW241	2023_04_05_DLW241_herm_01007_Statistics	19.51	WT	SYP5GFP	1443290	73976.9
0.508698	0.385532	MP	Herm	DLW241	2023_04_05_DLW241_herm_01007_Statistics	29.52	WT	SYP5GFP	2399300	81277.1
0.569649	0.461763	MP	Herm	DLW241	2023_04_05_DLW241_herm_01007_Statistics	29.7	WT	SYP5GFP	2587620	87125.3
0.571288	0.463812	MP	Herm	DLW241	2023_04_05_DLW241_herm_01007_Statistics	40.05	WT	SYP5GFP	3521020	87915.6
0.62096	0.525937	MP	Herm	DLW241	2023_04_05_DLW241_herm_01007_Statistics	27.88	WT	SYP5GFP	2525490	90584.3
0.669485	0.586627	MP	Herm	DLW241	2023_04_05_DLW241_herm_01007_Statistics	51.12	WT	SYP5GFP	5392170	105481
0.715761	0.644505	MP	Herm	DLW241	2023_04_05_DLW241_herm_01007_Statistics	47.58	WT	SYP5GFP	5259790	110546
0.647528	0.559165	MP	Herm	DLW241	2023_04_05_DLW241_herm_01007_Statistics	48.68	WT	SYP5GFP	4598980	94473.7
0.685261	0.606358	MP	Herm	DLW241	2023_04_05_DLW241_herm_01007_Statistics	35.91	WT	SYP5GFP	3606660	100436
0.733093	0.666181	MP	Herm	DLW241	2023_04_05_DLW241_herm_01007_Statistics	51.9	WT	SYP5GFP	5793240	111623
0.704877	0.630892	MP	Herm	DLW241	2023_04_05_DLW241_herm_01007_Statistics	43.39	WT	SYP5GFP	4922940	113458
0.664032	0.579806	MP	Herm	DLW241	2023_04_05_DLW241_herm_01007_Statistics	46.07	WT	SYP5GFP	4772940	103602
0.612806	0.515739	MP	Herm	DLW241	2023_04_05_DLW241_herm_01007_Statistics	39.27	WT	SYP5GFP	3528030	89840.3
0.679033	0.598568	MP	Herm	DLW241	2023_04_05_DLW241_herm_01007_Statistics	33.46	WT	SYP5GFP	3525530	105366
0.700157	0.624988	MP	Herm	DLW241	2023_04_05_DLW241_herm_01007_Statistics	40.92	WT	SYP5GFP	4052880	99044
0.747484	0.68418	LP	Herm	DLW241	2023_04_05_DLW241_herm_01007_Statistics	32.71	WT	SYP5GFP	3814130	116604
0.615937	0.519655	MP	Herm	DLW241	2023_04_05_DLW241_herm_01007_Statistics	43.08	WT	SYP5GFP	3986830	92544.8
0.688303	0.610163	MP	Herm	DLW241	2023_04_05_DLW241_herm_01007_Statistics	31.02	WT	SYP5GFP	3102810	100026
0.736191	0.670055	LP	Herm	DLW241	2023_04_05_DLW241_herm_01007_Statistics	57.88	WT	SYP5GFP	6250170	107985
0.62957	0.536705	MP	Herm	DLW241	2023_04_05_DLW241_herm_01007_Statistics	32.1	WT	SYP5GFP	2843180	88572.6
0.650452	0.562823	MP	Herm	DLW241	2023_04_05_DLW241_herm_01007_Statistics	30.38	WT	SYP5GFP	2941100	96810.4
0.67169	0.589384	MP	Herm	DLW241	2023_04_05_DLW241_herm_01007_Statistics	51.45	WT	SYP5GFP	5160030	100292
0.656112	0.569901	MP	Herm	DLW241	2023_04_05_DLW241_herm_01007_Statistics	20.11	WT	SYP5GFP	1996990	99303.3
0.71837	0.647767	MP	Herm	DLW241	2023_04_05_DLW241_herm_01007_Statistics	36.76	WT	SYP5GFP	3998940	108785
0.680183	0.600007	MP	Herm	DLW241	2023_04_05_DLW241_herm_01007_Statistics	26.49	WT	SYP5GFP	2390140	90228
0.71235	0.640238	MP	Herm	DLW241	2023_04_05_DLW241_herm_01007_Statistics	42.85	WT	SYP5GFP	4380390	102226
0.724075	0.654902	MP	Herm	DLW241	2023_04_05_DLW241_herm_01007_Statistics	57.87	WT	SYP5GFP	6102490	105452
0.992407	0.990503	LP	Herm	DLW241	2023_04_05_DLW241_herm_01007_Statistics	73.91	WT	SYP5GFP	8268220	111869
0.960285	0.950329	LP	Herm	DLW241	2023_04_05_DLW241_herm_01007_Statistics	71.31	WT	SYP5GFP	7863900	110278
0.930373	0.912918	LP	Herm	DLW241	2023_04_05_DLW241_herm_01007_Statistics	66.23	WT	SYP5GFP	7751480	117039
0.903094	0.878801	LP	Herm	DLW241	2023_04_05_DLW241_herm_01007_Statistics	62.95	WT	SYP5GFP	7789440	123740
0.991333	0.98916	LP	Herm	DLW241	2023_04_05_DLW241_herm_01007_Statistics	60.18	WT	SYP5GFP	6939230	115308
0.965244	0.956531	LP	Herm	DLW241	2023_04_05_DLW241_herm_01007_Statistics	64.52	WT	SYP5GFP	7276470	112779
0.936693	0.920823	LP	Herm	DLW241	2023_04_05_DLW241_herm_01007_Statistics	67.14	WT	SYP5GFP	7441980	110843
0.974684	0.968338	LP	Herm	DLW241	2023_04_05_DLW241_herm_01007_Statistics	62.45	WT	SYP5GFP	7003040	112138
0.948441	0.935515	LP	Herm	DLW241	2023_04_05_DLW241_herm_01007_Statistics	63.09	WT	SYP5GFP	7250810	114928
0.882551	0.853107	LP	Herm	DLW241	2023_04_05_DLW241_herm_01007_Statistics	62.95	WT	SYP5GFP	7544020	119841
0.904152	0.880124	LP	Herm	DLW241	2023_04_05_DLW241_herm_01007_Statistics	66.01	WT	SYP5GFP	7454130	112924
0.803745	0.754546	LP	Herm	DLW241	2023_04_05_DLW241_herm_01007_Statistics	33.95	WT	SYP5GFP	4296550	126555
0.841867	0.802224	LP	Herm	DLW241	2023_04_05_DLW241_herm_01007_Statistics	57.85	WT	SYP5GFP	7043420	121753
0.815638	0.769419	LP	Herm	DLW241	2023_04_05_DLW241_herm_01007_Statistics	29.67	WT	SYP5GFP	3529720	118966
0.980477	0.975582	LP	Herm	DLW241	2023_04_05_DLW241_herm_01007_Statistics	67.52	WT	SYP5GFP	7349180	108844
0.85932	0.824052	LP	Herm	DLW241	2023_04_05_DLW241_herm_01007_Statistics	54.52	WT	SYP5GFP	6795310	124639
0.768794	0.710832	LP	Herm	DLW241	2023_04_05_DLW241_herm_01007_Statistics	55.7	WT	SYP5GFP	6444340	115697
0.914916	0.893586	LP	Herm	DLW241	2023_04_05_DLW241_herm_01007_Statistics	63.88	WT	SYP5GFP	7327800	114712
0.953602	0.94197	LP	Herm	DLW241	2023_04_05_DLW241_herm_01007_Statistics	62.69	WT	SYP5GFP	7273220	116019
0.877972	0.84738	LP	Herm	DLW241	2023_04_05_DLW241_herm_01007_Statistics	62.96	WT	SYP5GFP	7576870	120344
0.78973	0.737016	LP	Herm	DLW241	2023_04_05_DLW241_herm_01007_Statistics	62.22	WT	SYP5GFP	7119810	114430
0.836782	0.795864	LP	Herm	DLW241	2023_04_05_DLW241_herm_01007_Statistics	31.65	WT	SYP5GFP	4531460	143174
0.928849	0.911012	LP	Herm	DLW241	2023_04_05_DLW241_herm_01007_Statistics	59.98	WT	SYP5GFP	7331560	122233
0.820162	0.775077	LP	Herm	DLW241	2023_04_05_DLW241_herm_01007_Statistics	39.33	WT	SYP5GFP	5277760	134192
0.842844	0.803445	LP	Herm	DLW241	2023_04_05_DLW241_herm_01007_Statistics	28.13	WT	SYP5GFP	3964110	140921
0.855584	0.81938	LP	Herm	DLW241	2023_04_05_DLW241_herm_01007_Statistics	63.56	WT	SYP5GFP	7405140	116506
0.886624	0.858201	LP	Herm	DLW241	2023_04_05_DLW241_herm_01007_Statistics	64.78	WT	SYP5GFP	7379050	113909
0.904779	0.880907	LP	Herm	DLW241	2023_04_05_DLW241_herm_01007_Statistics	53.15	WT	SYP5GFP	6524220	122751
0.77367	0.71693	LP	Herm	DLW241	2023_04_05_DLW241_herm_01007_Statistics	33.3	WT	SYP5GFP	4060720	121944
0.776595	0.720589	LP	Herm	DLW241	2023_04_05_DLW241_herm_01007_Statistics	57.08	WT	SYP5GFP	6571420	115126
0.757696	0.696952	LP	Herm	DLW241	2023_04_05_DLW241_herm_01007_Statistics	52.43	WT	SYP5GFP	6080040	115965
0.801605	0.751869	LP	Herm	DLW241	2023_04_05_DLW241_herm_01007_Statistics	35.22	WT	SYP5GFP	4103550	116512
0.797595	0.746854	LP	Herm	DLW241	2023_04_05_DLW241_herm_01007_Statistics	35.32	WT	SYP5GFP	4447310	125915
0.755196	0.693825	LP	Herm	DLW241	2023_04_05_DLW241_herm_01007_Statistics	47.14	WT	SYP5GFP	5268650	111766
1	1	LP	Herm	DLW241	2023_04_05_DLW241_herm_01007_Statistics	61.3	WT	SYP5GFP	6934400	113122
1	1	LP	Herm	DLW241	2023_04_05_DLW241_herm_01007_Statistics	45.88	WT	SYP5GFP	5307200	115676
0.145196	-0.00303569	TZ	Male	DLW241	2023_04_05_DLW241_male_01_Statistics	2.95	WT	SYP5GFP	164088	55623.1
0.141238	-0.00767964	TZ	Male	DLW241	2023_04_05_DLW241_male_01_Statistics	7.47	WT	SYP5GFP	421598	56438.8
0.120323	-0.0322217	TZ	Male	DLW241	2023_04_05_DLW241_male_01_Statistics	1.54	WT	SYP5GFP	85286	55380.5
0.127553	-0.0237383	TZ	Male	DLW241	2023_04_05_DLW241_male_01_Statistics	6	WT	SYP5GFP	323075	53845.8
0.119426	-0.0332746	TZ	Male	DLW241	2023_04_05_DLW241_male_01_Statistics	6.67	WT	SYP5GFP	355065	53233.1
0.0989271	-0.0573278	TZ	Male	DLW241	2023_04_05_DLW241_male_01_Statistics	2.86	WT	SYP5GFP	165238	57775.5
0.107991	-0.0466922	TZ	Male	DLW241	2023_04_05_DLW241_male_01_Statistics	5.41	WT	SYP5GFP	285876	52842.1
0.102022	-0.0536963	TZ	Male	DLW241	2023_04_05_DLW241_male_01_Statistics	6.18	WT	SYP5GFP	321708	52056.3
0.0889258	-0.0690635	TZ	Male	DLW241	2023_04_05_DLW241_male_01_Statistics	2.79	WT	SYP5GFP	155447	55715.8
0.17654	0.0337439	EP	Male	DLW241	2023_04_05_DLW241_male_01_Statistics	6.53	WT	SYP5GFP	379425	58104.9
0.156266	0.00995475	EP	Male	DLW241	2023_04_05_DLW241_male_01_Statistics	4.98	WT	SYP5GFP	282166	56659.8
0.174707	0.0315934	EP	Male	DLW241	2023_04_05_DLW241_male_01_Statistics	11.87	WT	SYP5GFP	644513	54297.6
0.151759	0.00466589	EP	Male	DLW241	2023_04_05_DLW241_male_01_Statistics	6.61	WT	SYP5GFP	361670	54715.6
0.23944	0.107551	EP	Male	DLW241	2023_04_05_DLW241_male_01_Statistics	7	WT	SYP5GFP	386679	55239.9
0.203706	0.0656213	EP	Male	DLW241	2023_04_05_DLW241_male_01_Statistics	6.57	WT	SYP5GFP	372328	56670.9
0.217273	0.0815407	EP	Male	DLW241	2023_04_05_DLW241_male_01_Statistics	8.75	WT	SYP5GFP	496045	56690.9
0.194083	0.0543287	EP	Male	DLW241	2023_04_05_DLW241_male_01_Statistics	6.77	WT	SYP5GFP	367697	54312.7
0.228051	0.0941869	EP	Male	DLW241	2023_04_05_DLW241_male_01_Statistics	10.49	WT	SYP5GFP	578607	55158
0.206011	0.068326	EP	Male	DLW241	2023_04_05_DLW241_male_01_Statistics	9.77	WT	SYP5GFP	514983	52710.6
0.297288	0.175431	EP	Male	DLW241	2023_04_05_DLW241_male_01_Statistics	14.54	WT	SYP5GFP	834304	57379.9
0.2734	0.1474	EP	Male	DLW241	2023_04_05_DLW241_male_01_Statistics	16.69	WT	SYP5GFP	966901	57933
0.318008	0.199743	EP	Male	DLW241	2023_04_05_DLW241_male_01_Statistics	20.72	WT	SYP5GFP	1230110	59368.2
0.288386	0.164985	EP	Male	DLW241	2023_04_05_DLW241_male_01_Statistics	17.72	WT	SYP5GFP	1022140	57682.8
0.248944	0.118704	EP	Male	DLW241	2023_04_05_DLW241_male_01_Statistics	13.15	WT	SYP5GFP	775874	59001.8
0.264922	0.137452	EP	Male	DLW241	2023_04_05_DLW241_male_01_Statistics	17.17	WT	SYP5GFP	1008400	58730.3
0.29759	0.175785	EP	Male	DLW241	2023_04_05_DLW241_male_01_Statistics	18.35	WT	SYP5GFP	1070670	58347.1
0.274629	0.148842	EP	Male	DLW241	2023_04_05_DLW241_male_01_Statistics	19.7	WT	SYP5GFP	1193080	60562.4
0.344684	0.231046	EP	Male	DLW241	2023_04_05_DLW241_male_01_Statistics	22.48	WT	SYP5GFP	1344970	59829.6
0.344814	0.231198	EP	Male	DLW241	2023_04_05_DLW241_male_01_Statistics	21.93	WT	SYP5GFP	1341820	61186.5
0.36077	0.249921	EP	Male	DLW241	2023_04_05_DLW241_male_01_Statistics	24.29	WT	SYP5GFP	1458340	60038.7
0.367864	0.258245	EP	Male	DLW241	2023_04_05_DLW241_male_01_Statistics	22.37	WT	SYP5GFP	1296340	57949.9
0.362058	0.251433	EP	Male	DLW241	2023_04_05_DLW241_male_01_Statistics	23.83	WT	SYP5GFP	1407900	59081
0.410521	0.3083	EP	Male	DLW241	2023_04_05_DLW241_male_01_Statistics	25.73	WT	SYP5GFP	1535990	59696.5
0.393824	0.288707	EP	Male	DLW241	2023_04_05_DLW241_male_01_Statistics	23.05	WT	SYP5GFP	1387640	60201.3
0.448602	0.352985	MP	Male	DLW241	2023_04_05_DLW241_male_01_Statistics	28.98	WT	SYP5GFP	1839870	63487.6
0.427726	0.328488	EP	Male	DLW241	2023_04_05_DLW241_male_01_Statistics	25.43	WT	SYP5GFP	1567840	61653.2
0.426679	0.32726	EP	Male	DLW241	2023_04_05_DLW241_male_01_Statistics	23.13	WT	SYP5GFP	1430020	61825.3
0.447159	0.351291	MP	Male	DLW241	2023_04_05_DLW241_male_01_Statistics	23.08	WT	SYP5GFP	1419170	61489.2
0.466786	0.374322	MP	Male	DLW241	2023_04_05_DLW241_male_01_Statistics	27.19	WT	SYP5GFP	1915610	70452.7
0.49708	0.409869	MP	Male	DLW241	2023_04_05_DLW241_male_01_Statistics	32.79	WT	SYP5GFP	2283440	69638.3
0.525423	0.443127	MP	Male	DLW241	2023_04_05_DLW241_male_01_Statistics	39.43	WT	SYP5GFP	2894360	73405
0.491613	0.403453	MP	Male	DLW241	2023_04_05_DLW241_male_01_Statistics	27.89	WT	SYP5GFP	1758860	63064.2
0.524282	0.441788	MP	Male	DLW241	2023_04_05_DLW241_male_01_Statistics	33.31	WT	SYP5GFP	2345540	70415.5
0.549084	0.470891	MP	Male	DLW241	2023_04_05_DLW241_male_01_Statistics	36.36	WT	SYP5GFP	2668210	73383.1
0.554098	0.476775	MP	Male	DLW241	2023_04_05_DLW241_male_01_Statistics	36.17	WT	SYP5GFP	2607110	72079.3
0.576801	0.503414	MP	Male	DLW241	2023_04_05_DLW241_male_01_Statistics	37.01	WT	SYP5GFP	3185340	86067
0.612309	0.54508	MP	Male	DLW241	2023_04_05_DLW241_male_01_Statistics	38.4	WT	SYP5GFP	3126490	81419
0.596129	0.526094	MP	Male	DLW241	2023_04_05_DLW241_male_01_Statistics	41.15	WT	SYP5GFP	3178020	77230.1
0.647326	0.586169	MP	Male	DLW241	2023_04_05_DLW241_male_01_Statistics	44.26	WT	SYP5GFP	3967380	89638
0.634296	0.57088	MP	Male	DLW241	2023_04_05_DLW241_male_01_Statistics	38.06	WT	SYP5GFP	2960250	77778.5
0.665969	0.608044	MP	Male	DLW241	2023_04_05_DLW241_male_01_Statistics	36.49	WT	SYP5GFP	3011080	82518
0.657842	0.598509	MP	Male	DLW241	2023_04_05_DLW241_male_01_Statistics	34.97	WT	SYP5GFP	2648640	75740.3
0.637055	0.574117	MP	Male	DLW241	2023_04_05_DLW241_male_01_Statistics	6.47	WT	SYP5GFP	372104	57512.2
0.697019	0.644479	MP	Male	DLW241	2023_04_05_DLW241_male_01_Statistics	44.14	WT	SYP5GFP	3801360	86120.5
0.725014	0.677329	LP	Male	DLW241	2023_04_05_DLW241_male_01_Statistics	43.93	WT	SYP5GFP	3940310	89695.2
0.746947	0.703065	LP	Male	DLW241	2023_04_05_DLW241_male_01_Statistics	43.27	WT	SYP5GFP	3433660	79354.3
0.774105	0.734933	LP	Male	DLW241	2023_04_05_DLW241_male_01_Statistics	55.45	WT	SYP5GFP	4861460	87672.9
0.799889	0.765188	LP	Male	DLW241	2023_04_05_DLW241_male_01_Statistics	48.08	WT	SYP5GFP	4199690	87348
0.828192	0.798399	LP	Male	DLW241	2023_04_05_DLW241_male_01_Statistics	52.71	WT	SYP5GFP	4389240	83271.5
0.857434	0.832711	LP	Male	DLW241	2023_04_05_DLW241_male_01_Statistics	53.44	WT	SYP5GFP	4350770	81414.1
0.887772	0.86831	LP	Male	DLW241	2023_04_05_DLW241_male_01_Statistics	48.23	WT	SYP5GFP	3631900	75303.8
0.921618	0.908026	LP	Male	DLW241	2023_04_05_DLW241_male_01_Statistics	42.12	WT	SYP5GFP	3069130	72866.3
0.956067	0.948448	LP	Male	DLW241	2023_04_05_DLW241_male_01_Statistics	47.81	WT	SYP5GFP	3647500	76291.6
0.993872	0.992809	LP	Male	DLW241	2023_04_05_DLW241_male_01_Statistics	51.4	WT	SYP5GFP	3944170	76734.8
0.0845135	-0.161201	TZ	Male	DLW241	2023_04_05_DLW241_male_01001_Statistics	6.63	WT	SYP5GFP	323343	48769.7
0.103346	-0.137314	TZ	Male	DLW241	2023_04_05_DLW241_male_01001_Statistics	8.6	WT	SYP5GFP	426513	49594.5
0.108823	-0.130367	TZ	Male	DLW241	2023_04_05_DLW241_male_01001_Statistics	9.03	WT	SYP5GFP	462035	51166.7
0.1258	-0.108834	TZ	Male	DLW241	2023_04_05_DLW241_male_01001_Statistics	6.13	WT	SYP5GFP	297634	48553.7
0.131383	-0.101752	TZ	Male	DLW241	2023_04_05_DLW241_male_01001_Statistics	4.82	WT	SYP5GFP	226127	46914.3
0.14849	-0.0800529	TZ	Male	DLW241	2023_04_05_DLW241_male_01001_Statistics	9.91	WT	SYP5GFP	456493	46063.9
0.180076	-0.03999	TZ	Male	DLW241	2023_04_05_DLW241_male_01001_Statistics	5.63	WT	SYP5GFP	262894	46695.2
0.196381	-0.0193086	TZ	Male	DLW241	2023_04_05_DLW241_male_01001_Statistics	13.29	WT	SYP5GFP	723933	54472
0.213392	0.00226766	EP	Male	DLW241	2023_04_05_DLW241_male_01001_Statistics	10.51	WT	SYP5GFP	528461	50281.7
0.235046	0.0297345	EP	Male	DLW241	2023_04_05_DLW241_male_01001_Statistics	12.55	WT	SYP5GFP	631232	50297.4
0.243795	0.0408311	EP	Male	DLW241	2023_04_05_DLW241_male_01001_Statistics	9.87	WT	SYP5GFP	476712	48299.1
0.264563	0.0671733	EP	Male	DLW241	2023_04_05_DLW241_male_01001_Statistics	8.63	WT	SYP5GFP	417587	48387.8
0.266558	0.0697037	EP	Male	DLW241	2023_04_05_DLW241_male_01001_Statistics	13.5	WT	SYP5GFP	713996	52888.6
0.292863	0.103068	EP	Male	DLW241	2023_04_05_DLW241_male_01001_Statistics	16.95	WT	SYP5GFP	885500	52241.9
0.29013	0.0996023	EP	Male	DLW241	2023_04_05_DLW241_male_01001_Statistics	10.36	WT	SYP5GFP	563178	54360.8
0.309194	0.123783	EP	Male	DLW241	2023_04_05_DLW241_male_01001_Statistics	15.95	WT	SYP5GFP	845742	53024.6
0.329866	0.150003	EP	Male	DLW241	2023_04_05_DLW241_male_01001_Statistics	19.94	WT	SYP5GFP	1141400	57241.7
0.319568	0.136942	EP	Male	DLW241	2023_04_05_DLW241_male_01001_Statistics	22.06	WT	SYP5GFP	1234630	55966.9
0.331843	0.152511	EP	Male	DLW241	2023_04_05_DLW241_male_01001_Statistics	19.34	WT	SYP5GFP	1051310	54359.4
0.347195	0.171984	EP	Male	DLW241	2023_04_05_DLW241_male_01001_Statistics	22.11	WT	SYP5GFP	1211420	54790.6
0.360695	0.189107	EP	Male	DLW241	2023_04_05_DLW241_male_01001_Statistics	24.58	WT	SYP5GFP	1342130	54602.5
0.374399	0.206489	EP	Male	DLW241	2023_04_05_DLW241_male_01001_Statistics	25.61	WT	SYP5GFP	1467430	57299.1
0.388983	0.224987	EP	Male	DLW241	2023_04_05_DLW241_male_01001_Statistics	21.23	WT	SYP5GFP	1094670	51562.4
0.402023	0.241527	EP	Male	DLW241	2023_04_05_DLW241_male_01001_Statistics	33.71	WT	SYP5GFP	2029760	60212.4
0.418187	0.26203	EP	Male	DLW241	2023_04_05_DLW241_male_01001_Statistics	24.37	WT	SYP5GFP	1269350	52086.6
0.408489	0.249729	EP	Male	DLW241	2023_04_05_DLW241_male_01001_Statistics	29.39	WT	SYP5GFP	1784660	60723.4
0.433422	0.281354	EP	Male	DLW241	2023_04_05_DLW241_male_01001_Statistics	28.78	WT	SYP5GFP	1736460	60335.6
0.44474	0.295709	EP	Male	DLW241	2023_04_05_DLW241_male_01001_Statistics	26.91	WT	SYP5GFP	1591450	59139.7
0.447184	0.29881	EP	Male	DLW241	2023_04_05_DLW241_male_01001_Statistics	35.32	WT	SYP5GFP	2221490	62896.1
0.467253	0.324264	EP	Male	DLW241	2023_04_05_DLW241_male_01001_Statistics	42.31	WT	SYP5GFP	2992930	70738.1
0.48306	0.344314	MP	Male	DLW241	2023_04_05_DLW241_male_01001_Statistics	43.3	WT	SYP5GFP	2872600	66341.8
0.478836	0.338957	MP	Male	DLW241	2023_04_05_DLW241_male_01001_Statistics	34.55	WT	SYP5GFP	2285540	66151.7
0.49949	0.365154	MP	Male	DLW241	2023_04_05_DLW241_male_01001_Statistics	42.57	WT	SYP5GFP	3052590	71707.5
0.521276	0.392788	MP	Male	DLW241	2023_04_05_DLW241_male_01001_Statistics	49	WT	SYP5GFP	3373030	68837.3
0.516165	0.386304	MP	Male	DLW241	2023_04_05_DLW241_male_01001_Statistics	37.89	WT	SYP5GFP	2480250	65459.2
0.544022	0.421638	MP	Male	DLW241	2023_04_05_DLW241_male_01001_Statistics	46.03	WT	SYP5GFP	3479540	75592.9
0.559731	0.441564	MP	Male	DLW241	2023_04_05_DLW241_male_01001_Statistics	47.8	WT	SYP5GFP	3639010	76129.9
0.55911	0.440776	MP	Male	DLW241	2023_04_05_DLW241_male_01001_Statistics	39.12	WT	SYP5GFP	2619360	66957.1
0.583368	0.471545	MP	Male	DLW241	2023_04_05_DLW241_male_01001_Statistics	50.94	WT	SYP5GFP	3966260	77861.4
0.59683	0.48862	MP	Male	DLW241	2023_04_05_DLW241_male_01001_Statistics	41.51	WT	SYP5GFP	2754030	66346.2
0.615454	0.512243	MP	Male	DLW241	2023_04_05_DLW241_male_01001_Statistics	43.78	WT	SYP5GFP	3422890	78183.9
0.639925	0.543281	MP	Male	DLW241	2023_04_05_DLW241_male_01001_Statistics	50.68	WT	SYP5GFP	4165450	82191.2
0.63462	0.536553	MP	Male	DLW241	2023_04_05_DLW241_male_01001_Statistics	48.89	WT	SYP5GFP	3431140	70180.8
0.67032	0.581834	MP	Male	DLW241	2023_04_05_DLW241_male_01001_Statistics	44.99	WT	SYP5GFP	3625850	80592.4
0.688967	0.605486	MP	Male	DLW241	2023_04_05_DLW241_male_01001_Statistics	44.9	WT	SYP5GFP	3224000	71804
0.700412	0.620003	MP	Male	DLW241	2023_04_05_DLW241_male_01001_Statistics	50.21	WT	SYP5GFP	3831800	76315.5
0.734233	0.662902	MP	Male	DLW241	2023_04_05_DLW241_male_01001_Statistics	46.91	WT	SYP5GFP	3530020	75250.9
0.723722	0.64957	MP	Male	DLW241	2023_04_05_DLW241_male_01001_Statistics	45.52	WT	SYP5GFP	3337880	73327.8
0.75576	0.690206	LP	Male	DLW241	2023_04_05_DLW241_male_01001_Statistics	44.63	WT	SYP5GFP	3303270	74014.6
0.782377	0.723967	LP	Male	DLW241	2023_04_05_DLW241_male_01001_Statistics	50.44	WT	SYP5GFP	3207510	63590.6
0.781408	0.722738	LP	Male	DLW241	2023_04_05_DLW241_male_01001_Statistics	55.81	WT	SYP5GFP	4566600	81824
0.81091	0.760158	LP	Male	DLW241	2023_04_05_DLW241_male_01001_Statistics	52.13	WT	SYP5GFP	4172760	80045.3
0.820856	0.772774	LP	Male	DLW241	2023_04_05_DLW241_male_01001_Statistics	49.09	WT	SYP5GFP	3169720	64569.6
0.82876	0.782799	LP	Male	DLW241	2023_04_05_DLW241_male_01001_Statistics	51.67	WT	SYP5GFP	4583420	88705.6
0.851656	0.811841	LP	Male	DLW241	2023_04_05_DLW241_male_01001_Statistics	50.36	WT	SYP5GFP	3641250	72304.4
0.865373	0.82924	LP	Male	DLW241	2023_04_05_DLW241_male_01001_Statistics	36.03	WT	SYP5GFP	2230680	61911.7
0.891744	0.862689	LP	Male	DLW241	2023_04_05_DLW241_male_01001_Statistics	48.54	WT	SYP5GFP	2920110	60158.8
0.862939	0.826152	LP	Male	DLW241	2023_04_05_DLW241_male_01001_Statistics	48.35	WT	SYP5GFP	4305770	89054.2
0.928649	0.909498	LP	Male	DLW241	2023_04_05_DLW241_male_01001_Statistics	47.55	WT	SYP5GFP	2886240	60699.1
0.89533	0.867236	LP	Male	DLW241	2023_04_05_DLW241_male_01001_Statistics	59.69	WT	SYP5GFP	4180750	70041
0.90197	0.875659	LP	Male	DLW241	2023_04_05_DLW241_male_01001_Statistics	51.6	WT	SYP5GFP	4231770	82011
0.875862	0.842544	LP	Male	DLW241	2023_04_05_DLW241_male_01001_Statistics	46.91	WT	SYP5GFP	3934270	83868.5
0.908569	0.88403	LP	Male	DLW241	2023_04_05_DLW241_male_01001_Statistics	54.42	WT	SYP5GFP	4559910	83791.1
0.850979	0.810983	LP	Male	DLW241	2023_04_05_DLW241_male_01001_Statistics	50.61	WT	SYP5GFP	4271130	84393
0.940049	0.923959	LP	Male	DLW241	2023_04_05_DLW241_male_01001_Statistics	50.4	WT	SYP5GFP	3535910	70156.9
0.958865	0.947824	LP	Male	DLW241	2023_04_05_DLW241_male_01001_Statistics	50.15	WT	SYP5GFP	4291690	85577.1
0.951375	0.938324	LP	Male	DLW241	2023_04_05_DLW241_male_01001_Statistics	54.78	WT	SYP5GFP	3927860	71702.4
0.990568	0.988037	LP	Male	DLW241	2023_04_05_DLW241_male_01001_Statistics	46.63	WT	SYP5GFP	3591320	77017.4
0.979761	0.974329	LP	Male	DLW241	2023_04_05_DLW241_male_01001_Statistics	51.47	WT	SYP5GFP	3935470	76461.4
0.987926	0.984685	LP	Male	DLW241	2023_04_05_DLW241_male_01001_Statistics	38.93	WT	SYP5GFP	3012700	77387.6
0.0789557	-0.00965695	TZ	Male	DLW241	2023_04_05_DLW241_male_01002_Statistics	12.04	WT	SYP5GFP	576205	47857.6
0.0539116	-0.0371105	TZ	Male	DLW241	2023_04_05_DLW241_male_01002_Statistics	11.81	WT	SYP5GFP	565940	47920.4
0.0399175	-0.0524509	TZ	Male	DLW241	2023_04_05_DLW241_male_01002_Statistics	15.24	WT	SYP5GFP	759120	49811
0.0782805	-0.0103971	TZ	Male	DLW241	2023_04_05_DLW241_male_01002_Statistics	19.28	WT	SYP5GFP	946683	49101.8
0.0577423	-0.0329112	TZ	Male	DLW241	2023_04_05_DLW241_male_01002_Statistics	14.33	WT	SYP5GFP	695462	48531.9
0.0142521	-0.0805856	TZ	Male	DLW241	2023_04_05_DLW241_male_01002_Statistics	14.91	WT	SYP5GFP	732767	49146
0.0324166	-0.0606735	TZ	Male	DLW241	2023_04_05_DLW241_male_01002_Statistics	13.38	WT	SYP5GFP	644514	48170
0.115812	0.0307451	EP	Male	DLW241	2023_04_05_DLW241_male_01002_Statistics	16.98	WT	SYP5GFP	828168	48773.1
0.119335	0.0346077	EP	Male	DLW241	2023_04_05_DLW241_male_01002_Statistics	22.14	WT	SYP5GFP	1116470	50427.7
0.100339	0.0137838	EP	Male	DLW241	2023_04_05_DLW241_male_01002_Statistics	17.7	WT	SYP5GFP	834958	47172.8
0.126549	0.0425151	EP	Male	DLW241	2023_04_05_DLW241_male_01002_Statistics	20.53	WT	SYP5GFP	987769	48113.4
0.101666	0.0152388	EP	Male	DLW241	2023_04_05_DLW241_male_01002_Statistics	20.28	WT	SYP5GFP	1021290	50359.5
0.164718	0.0843566	EP	Male	DLW241	2023_04_05_DLW241_male_01002_Statistics	21.8	WT	SYP5GFP	1106960	50778
0.141042	0.0584026	EP	Male	DLW241	2023_04_05_DLW241_male_01002_Statistics	21.9	WT	SYP5GFP	1116210	50968.5
0.142607	0.0601179	EP	Male	DLW241	2023_04_05_DLW241_male_01002_Statistics	23.52	WT	SYP5GFP	1219950	51868.6
0.149355	0.0675151	EP	Male	DLW241	2023_04_05_DLW241_male_01002_Statistics	21.4	WT	SYP5GFP	1013700	47369.2
0.179663	0.10074	EP	Male	DLW241	2023_04_05_DLW241_male_01002_Statistics	27.6	WT	SYP5GFP	1423980	51593.5
0.185976	0.10766	EP	Male	DLW241	2023_04_05_DLW241_male_01002_Statistics	21.48	WT	SYP5GFP	1125490	52397.1
0.199896	0.122919	EP	Male	DLW241	2023_04_05_DLW241_male_01002_Statistics	15.86	WT	SYP5GFP	765556	48269.6
0.223244	0.148513	EP	Male	DLW241	2023_04_05_DLW241_male_01002_Statistics	24.72	WT	SYP5GFP	1266590	51237.5
0.218768	0.143607	EP	Male	DLW241	2023_04_05_DLW241_male_01002_Statistics	19.13	WT	SYP5GFP	917381	47955.1
0.245961	0.173416	EP	Male	DLW241	2023_04_05_DLW241_male_01002_Statistics	26.85	WT	SYP5GFP	1389030	51733
0.261938	0.19093	EP	Male	DLW241	2023_04_05_DLW241_male_01002_Statistics	33.66	WT	SYP5GFP	1800380	53487.2
0.241434	0.168453	EP	Male	DLW241	2023_04_05_DLW241_male_01002_Statistics	24.91	WT	SYP5GFP	1325190	53199.1
0.262034	0.191035	EP	Male	DLW241	2023_04_05_DLW241_male_01002_Statistics	27.86	WT	SYP5GFP	1594940	57248.4
0.292155	0.224054	EP	Male	DLW241	2023_04_05_DLW241_male_01002_Statistics	37.73	WT	SYP5GFP	2136040	56613.8
0.3688	0.308073	EP	Male	DLW241	2023_04_05_DLW241_male_01002_Statistics	39.35	WT	SYP5GFP	2315460	58842.7
0.338711	0.27509	EP	Male	DLW241	2023_04_05_DLW241_male_01002_Statistics	32.23	WT	SYP5GFP	1896250	58834.9
0.311754	0.245539	EP	Male	DLW241	2023_04_05_DLW241_male_01002_Statistics	33.03	WT	SYP5GFP	1879070	56889.8
0.319652	0.254197	EP	Male	DLW241	2023_04_05_DLW241_male_01002_Statistics	34.85	WT	SYP5GFP	1984500	56944
0.313031	0.246939	EP	Male	DLW241	2023_04_05_DLW241_male_01002_Statistics	18.27	WT	SYP5GFP	904991	49534.3
0.398963	0.341138	MP	Male	DLW241	2023_04_05_DLW241_male_01002_Statistics	41.23	WT	SYP5GFP	2358510	57203.7
0.412102	0.355541	MP	Male	DLW241	2023_04_05_DLW241_male_01002_Statistics	45.78	WT	SYP5GFP	3016970	65901.5
0.443544	0.390008	MP	Male	DLW241	2023_04_05_DLW241_male_01002_Statistics	48.63	WT	SYP5GFP	3342400	68731.2
0.432423	0.377817	MP	Male	DLW241	2023_04_05_DLW241_male_01002_Statistics	42.38	WT	SYP5GFP	2628740	62027.8
0.468559	0.41743	MP	Male	DLW241	2023_04_05_DLW241_male_01002_Statistics	51.18	WT	SYP5GFP	3536660	69102.4
0.501755	0.45382	MP	Male	DLW241	2023_04_05_DLW241_male_01002_Statistics	51.58	WT	SYP5GFP	4076830	79039
0.462174	0.410431	MP	Male	DLW241	2023_04_05_DLW241_male_01002_Statistics	47.47	WT	SYP5GFP	3047860	64206
0.484478	0.43488	MP	Male	DLW241	2023_04_05_DLW241_male_01002_Statistics	46.79	WT	SYP5GFP	3434070	73393.2
0.514555	0.467851	MP	Male	DLW241	2023_04_05_DLW241_male_01002_Statistics	48.37	WT	SYP5GFP	3517660	72724
0.544395	0.500562	MP	Male	DLW241	2023_04_05_DLW241_male_01002_Statistics	61.41	WT	SYP5GFP	5204180	84744.8
0.578239	0.537661	MP	Male	DLW241	2023_04_05_DLW241_male_01002_Statistics	59.31	WT	SYP5GFP	4835070	81522
0.606098	0.568201	MP	Male	DLW241	2023_04_05_DLW241_male_01002_Statistics	58.3	WT	SYP5GFP	4822740	82722.8
0.621452	0.585033	MP	Male	DLW241	2023_04_05_DLW241_male_01002_Statistics	54.2	WT	SYP5GFP	4317680	79662
0.643807	0.609538	MP	Male	DLW241	2023_04_05_DLW241_male_01002_Statistics	59.62	WT	SYP5GFP	5186920	86999.7
0.654588	0.621356	MP	Male	DLW241	2023_04_05_DLW241_male_01002_Statistics	61	WT	SYP5GFP	4298130	70461.1
0.675703	0.644503	MP	Male	DLW241	2023_04_05_DLW241_male_01002_Statistics	62.06	WT	SYP5GFP	5371560	86554.3
0.708346	0.680287	LP	Male	DLW241	2023_04_05_DLW241_male_01002_Statistics	64.06	WT	SYP5GFP	5659510	88347
0.720977	0.694133	LP	Male	DLW241	2023_04_05_DLW241_male_01002_Statistics	56.01	WT	SYP5GFP	4206830	75108.6
0.742514	0.717741	LP	Male	DLW241	2023_04_05_DLW241_male_01002_Statistics	63.55	WT	SYP5GFP	6038460	95019
0.748151	0.723921	LP	Male	DLW241	2023_04_05_DLW241_male_01002_Statistics	64.58	WT	SYP5GFP	5161890	79930.2
0.776463	0.754957	LP	Male	DLW241	2023_04_05_DLW241_male_01002_Statistics	69.67	WT	SYP5GFP	6955730	99838.2
0.800368	0.781162	LP	Male	DLW241	2023_04_05_DLW241_male_01002_Statistics	63.88	WT	SYP5GFP	4969140	77788.7
0.805759	0.787071	LP	Male	DLW241	2023_04_05_DLW241_male_01002_Statistics	59.24	WT	SYP5GFP	5357680	90440.2
0.817316	0.799741	LP	Male	DLW241	2023_04_05_DLW241_male_01002_Statistics	65.04	WT	SYP5GFP	6089840	93632.2
0.842475	0.827319	LP	Male	DLW241	2023_04_05_DLW241_male_01002_Statistics	64.9	WT	SYP5GFP	6173080	95116.8
0.870242	0.857758	LP	Male	DLW241	2023_04_05_DLW241_male_01002_Statistics	61.76	WT	SYP5GFP	4431380	71751.6
0.859199	0.845653	LP	Male	DLW241	2023_04_05_DLW241_male_01002_Statistics	67.18	WT	SYP5GFP	6470030	96308.9
0.886747	0.875852	LP	Male	DLW241	2023_04_05_DLW241_male_01002_Statistics	58.99	WT	SYP5GFP	5052300	85646.7
0.908133	0.899294	LP	Male	DLW241	2023_04_05_DLW241_male_01002_Statistics	57.99	WT	SYP5GFP	4418660	76196.9
0.9011	0.891585	LP	Male	DLW241	2023_04_05_DLW241_male_01002_Statistics	67.52	WT	SYP5GFP	6523000	96608.4
0.924757	0.917518	LP	Male	DLW241	2023_04_05_DLW241_male_01002_Statistics	57.78	WT	SYP5GFP	5248360	90833.5
0.94206	0.936486	LP	Male	DLW241	2023_04_05_DLW241_male_01002_Statistics	56.68	WT	SYP5GFP	4131860	72898
0.947846	0.942828	LP	Male	DLW241	2023_04_05_DLW241_male_01002_Statistics	65.58	WT	SYP5GFP	6142810	93669
0.965874	0.96259	LP	Male	DLW241	2023_04_05_DLW241_male_01002_Statistics	69.62	WT	SYP5GFP	6479600	93071
0.992175	0.991422	LP	Male	DLW241	2023_04_05_DLW241_male_01002_Statistics	64.02	WT	SYP5GFP	6141560	95931.9
0.0688554	-0.148645	TZ	Male	DLW241	2023_04_06_DLW241_male_01_Statistics	13.14	WT	SYP5GFP	840123	63936.3
0.0462042	-0.176587	TZ	Male	DLW241	2023_04_06_DLW241_male_01_Statistics	11.24	WT	SYP5GFP	773609	68826.4
0.18191	-0.009183	TZ	Male	DLW241	2023_04_06_DLW241_male_01_Statistics	10.68	WT	SYP5GFP	733225	68654
0.0999151	-0.110331	TZ	Male	DLW241	2023_04_06_DLW241_male_01_Statistics	8.55	WT	SYP5GFP	534436	62507.1
0.189354	5.81955e-17	EP	Male	DLW241	2023_04_06_DLW241_male_01_Statistics	17.48	WT	SYP5GFP	1168680	66858.1
0.224331	0.0431468	EP	Male	DLW241	2023_04_06_DLW241_male_01_Statistics	12.62	WT	SYP5GFP	812177	64356.3
0.213862	0.0302327	EP	Male	DLW241	2023_04_06_DLW241_male_01_Statistics	20.41	WT	SYP5GFP	1318560	64603.6
0.243728	0.0670747	EP	Male	DLW241	2023_04_06_DLW241_male_01_Statistics	13.69	WT	SYP5GFP	1057420	77240.3
0.255182	0.0812048	EP	Male	DLW241	2023_04_06_DLW241_male_01_Statistics	26.58	WT	SYP5GFP	1938720	72939.1
0.283866	0.116589	EP	Male	DLW241	2023_04_06_DLW241_male_01_Statistics	9.54	WT	SYP5GFP	609112	63848.2
0.274695	0.105275	EP	Male	DLW241	2023_04_06_DLW241_male_01_Statistics	26.47	WT	SYP5GFP	1932170	72994.7
0.29429	0.129447	EP	Male	DLW241	2023_04_06_DLW241_male_01_Statistics	28.04	WT	SYP5GFP	1989060	70936.5
0.190162	0.000997148	EP	Male	DLW241	2023_04_06_DLW241_male_01_Statistics	13.67	WT	SYP5GFP	836712	61207.9
0.320555	0.161847	EP	Male	DLW241	2023_04_06_DLW241_male_01_Statistics	16.61	WT	SYP5GFP	1123170	67620.1
0.309862	0.148657	EP	Male	DLW241	2023_04_06_DLW241_male_01_Statistics	25.75	WT	SYP5GFP	1945090	75537.5
0.342515	0.188937	EP	Male	DLW241	2023_04_06_DLW241_male_01_Statistics	21.57	WT	SYP5GFP	1443140	66905
0.345927	0.193146	EP	Male	DLW241	2023_04_06_DLW241_male_01_Statistics	28.42	WT	SYP5GFP	2178490	76653.4
0.325516	0.167967	EP	Male	DLW241	2023_04_06_DLW241_male_01_Statistics	33.06	WT	SYP5GFP	2425410	73363.9
0.405661	0.266833	EP	Male	DLW241	2023_04_06_DLW241_male_01_Statistics	21.87	WT	SYP5GFP	1654460	75649.7
0.359496	0.209884	EP	Male	DLW241	2023_04_06_DLW241_male_01_Statistics	31.01	WT	SYP5GFP	2398370	77341.8
0.383648	0.239677	EP	Male	DLW241	2023_04_06_DLW241_male_01_Statistics	27.47	WT	SYP5GFP	2131860	77606.8
0.396354	0.255352	EP	Male	DLW241	2023_04_06_DLW241_male_01_Statistics	33.9	WT	SYP5GFP	2656020	78348.7
0.424221	0.289728	EP	Male	DLW241	2023_04_06_DLW241_male_01_Statistics	35.43	WT	SYP5GFP	2787270	78669.8
0.44665	0.317396	EP	Male	DLW241	2023_04_06_DLW241_male_01_Statistics	32.03	WT	SYP5GFP	2435150	76027.2
0.465705	0.340902	MP	Male	DLW241	2023_04_06_DLW241_male_01_Statistics	32.81	WT	SYP5GFP	2702950	82381.9
0.441093	0.310541	EP	Male	DLW241	2023_04_06_DLW241_male_01_Statistics	37.66	WT	SYP5GFP	3162870	83984.9
0.498195	0.380981	MP	Male	DLW241	2023_04_06_DLW241_male_01_Statistics	34.07	WT	SYP5GFP	2987890	87698.6
0.517089	0.404289	MP	Male	DLW241	2023_04_06_DLW241_male_01_Statistics	34.43	WT	SYP5GFP	3118730	90581.8
0.581487	0.483729	MP	Male	DLW241	2023_04_06_DLW241_male_01_Statistics	29.37	WT	SYP5GFP	2974680	101283
0.554465	0.450395	MP	Male	DLW241	2023_04_06_DLW241_male_01_Statistics	30.78	WT	SYP5GFP	2798710	90926.3
0.602121	0.509183	MP	Male	DLW241	2023_04_06_DLW241_male_01_Statistics	27.61	WT	SYP5GFP	2248360	81432.8
0.577383	0.478666	MP	Male	DLW241	2023_04_06_DLW241_male_01_Statistics	25.52	WT	SYP5GFP	2425110	95027.8
0.585474	0.488648	MP	Male	DLW241	2023_04_06_DLW241_male_01_Statistics	38.65	WT	SYP5GFP	3732060	96560.4
0.643253	0.559922	MP	Male	DLW241	2023_04_06_DLW241_male_01_Statistics	43.57	WT	SYP5GFP	4030830	92513.9
0.706463	0.637897	MP	Male	DLW241	2023_04_06_DLW241_male_01_Statistics	34.86	WT	SYP5GFP	2640980	75759.6
0.646399	0.563804	MP	Male	DLW241	2023_04_06_DLW241_male_01_Statistics	31.3	WT	SYP5GFP	2327110	74348.6
0.672353	0.59582	MP	Male	DLW241	2023_04_06_DLW241_male_01_Statistics	45.27	WT	SYP5GFP	4239790	93655.6
0.642069	0.558463	MP	Male	DLW241	2023_04_06_DLW241_male_01_Statistics	37.15	WT	SYP5GFP	3297900	88772.5
0.688555	0.615806	MP	Male	DLW241	2023_04_06_DLW241_male_01_Statistics	47.54	WT	SYP5GFP	4355340	91614.2
0.767677	0.71341	LP	Male	DLW241	2023_04_06_DLW241_male_01_Statistics	40.08	WT	SYP5GFP	3031770	75643
0.801337	0.754932	LP	Male	DLW241	2023_04_06_DLW241_male_01_Statistics	34.96	WT	SYP5GFP	2461410	70406.5
0.821354	0.779625	LP	Male	DLW241	2023_04_06_DLW241_male_01_Statistics	43.36	WT	SYP5GFP	3829890	88327.7
0.748162	0.689337	LP	Male	DLW241	2023_04_06_DLW241_male_01_Statistics	42.53	WT	SYP5GFP	3754590	88281
0.754825	0.697556	LP	Male	DLW241	2023_04_06_DLW241_male_01_Statistics	40.51	WT	SYP5GFP	3749440	92555.9
0.787589	0.737973	LP	Male	DLW241	2023_04_06_DLW241_male_01_Statistics	40.18	WT	SYP5GFP	3414640	84983.6
0.72536	0.661208	MP	Male	DLW241	2023_04_06_DLW241_male_01_Statistics	44.4	WT	SYP5GFP	4271170	96197.5
0.826452	0.785914	LP	Male	DLW241	2023_04_06_DLW241_male_01_Statistics	47.49	WT	SYP5GFP	3929050	82734.3
0.919637	0.900865	LP	Male	DLW241	2023_04_06_DLW241_male_01_Statistics	36.33	WT	SYP5GFP	2763270	76060.3
0.953792	0.942999	LP	Male	DLW241	2023_04_06_DLW241_male_01_Statistics	30.91	WT	SYP5GFP	2109370	68242.3
0.848817	0.813503	LP	Male	DLW241	2023_04_06_DLW241_male_01_Statistics	35.39	WT	SYP5GFP	2538450	71727.9
0.988362	0.985643	LP	Male	DLW241	2023_04_06_DLW241_male_01_Statistics	40.42	WT	SYP5GFP	3482870	86167
0.881458	0.853769	LP	Male	DLW241	2023_04_06_DLW241_male_01_Statistics	36.34	WT	SYP5GFP	2704890	74432.9
0.946636	0.934172	LP	Male	DLW241	2023_04_06_DLW241_male_01_Statistics	42.59	WT	SYP5GFP	3627720	85177.7
0.863021	0.831025	LP	Male	DLW241	2023_04_06_DLW241_male_01_Statistics	38.89	WT	SYP5GFP	3077080	79122.7
0.904497	0.882189	LP	Male	DLW241	2023_04_06_DLW241_male_01_Statistics	40.5	WT	SYP5GFP	3442940	85010.9
0.879278	0.85108	LP	Male	DLW241	2023_04_06_DLW241_male_01_Statistics	44.15	WT	SYP5GFP	3926590	88937.5
0.921418	0.903063	LP	Male	DLW241	2023_04_06_DLW241_male_01_Statistics	48.68	WT	SYP5GFP	4265540	87624.1
0.96839	0.961006	LP	Male	DLW241	2023_04_06_DLW241_male_01_Statistics	41.79	WT	SYP5GFP	3444970	82435.3
0.0501538	-0.208071	TZ	Male	DLW241	2023_04_06_DLW241_male_01001_Statistics	4.37	WT	SYP5GFP	213223	48792.4
0.0140868	-0.253943	TZ	Male	DLW241	2023_04_06_DLW241_male_01001_Statistics	6.55	WT	SYP5GFP	301347	46007.2
0.0867573	-0.161517	TZ	Male	DLW241	2023_04_06_DLW241_male_01001_Statistics	5.57	WT	SYP5GFP	270097	48491.4
0.0873306	-0.160787	TZ	Male	DLW241	2023_04_06_DLW241_male_01001_Statistics	9.89	WT	SYP5GFP	498063	50360.3
0.0984371	-0.146661	TZ	Male	DLW241	2023_04_06_DLW241_male_01001_Statistics	5.46	WT	SYP5GFP	257067	47081.9
0.121895	-0.116826	TZ	Male	DLW241	2023_04_06_DLW241_male_01001_Statistics	7.66	WT	SYP5GFP	379780	49579.6
0.157926	-0.0709993	TZ	Male	DLW241	2023_04_06_DLW241_male_01001_Statistics	9.86	WT	SYP5GFP	480287	48710.6
0.135453	-0.099583	TZ	Male	DLW241	2023_04_06_DLW241_male_01001_Statistics	9.13	WT	SYP5GFP	446883	48946.7
0.141253	-0.0922062	TZ	Male	DLW241	2023_04_06_DLW241_male_01001_Statistics	10.78	WT	SYP5GFP	522597	48478.4
0.128321	-0.108653	TZ	Male	DLW241	2023_04_06_DLW241_male_01001_Statistics	10.66	WT	SYP5GFP	509880	47831.1
0.194919	-0.0239504	TZ	Male	DLW241	2023_04_06_DLW241_male_01001_Statistics	7.67	WT	SYP5GFP	369056	48116.8
0.19376	-0.0254241	TZ	Male	DLW241	2023_04_06_DLW241_male_01001_Statistics	6.16	WT	SYP5GFP	303501	49269.6
0.22652	0.0162426	EP	Male	DLW241	2023_04_06_DLW241_male_01001_Statistics	15.38	WT	SYP5GFP	791581	51468.2
0.249575	0.0455649	EP	Male	DLW241	2023_04_06_DLW241_male_01001_Statistics	18.61	WT	SYP5GFP	970611	52155.3
0.263208	0.0629036	EP	Male	DLW241	2023_04_06_DLW241_male_01001_Statistics	17.74	WT	SYP5GFP	933582	52625.8
0.220183	0.00818274	EP	Male	DLW241	2023_04_06_DLW241_male_01001_Statistics	13.08	WT	SYP5GFP	636979	48698.7
0.283988	0.0893331	EP	Male	DLW241	2023_04_06_DLW241_male_01001_Statistics	12.33	WT	SYP5GFP	618385	50152.9
0.236955	0.0295136	EP	Male	DLW241	2023_04_06_DLW241_male_01001_Statistics	14.42	WT	SYP5GFP	724545	50245.8
0.328741	0.146253	EP	Male	DLW241	2023_04_06_DLW241_male_01001_Statistics	19.42	WT	SYP5GFP	1010040	52010.3
0.30867	0.120726	EP	Male	DLW241	2023_04_06_DLW241_male_01001_Statistics	19.06	WT	SYP5GFP	1058870	55554.6
0.361185	0.187518	EP	Male	DLW241	2023_04_06_DLW241_male_01001_Statistics	13.87	WT	SYP5GFP	772235	55676.6
0.336166	0.155697	EP	Male	DLW241	2023_04_06_DLW241_male_01001_Statistics	19.04	WT	SYP5GFP	1027840	53983.2
0.390418	0.224698	EP	Male	DLW241	2023_04_06_DLW241_male_01001_Statistics	24.22	WT	SYP5GFP	1352750	55852.6
0.406614	0.245296	EP	Male	DLW241	2023_04_06_DLW241_male_01001_Statistics	27.24	WT	SYP5GFP	1613160	59220.3
0.416091	0.25735	EP	Male	DLW241	2023_04_06_DLW241_male_01001_Statistics	29.65	WT	SYP5GFP	1797870	60636.4
0.455396	0.30734	EP	Male	DLW241	2023_04_06_DLW241_male_01001_Statistics	31.46	WT	SYP5GFP	1925530	61205.7
0.438754	0.286173	EP	Male	DLW241	2023_04_06_DLW241_male_01001_Statistics	32.31	WT	SYP5GFP	1871750	57931
0.484346	0.34416	MP	Male	DLW241	2023_04_06_DLW241_male_01001_Statistics	36.79	WT	SYP5GFP	2347310	63802.9
0.474876	0.332116	EP	Male	DLW241	2023_04_06_DLW241_male_01001_Statistics	29.35	WT	SYP5GFP	1869280	63689.3
0.460572	0.313923	EP	Male	DLW241	2023_04_06_DLW241_male_01001_Statistics	26.17	WT	SYP5GFP	1439070	54989.3
0.518764	0.387935	MP	Male	DLW241	2023_04_06_DLW241_male_01001_Statistics	36.36	WT	SYP5GFP	2319600	63795.4
0.486979	0.347509	MP	Male	DLW241	2023_04_06_DLW241_male_01001_Statistics	30.8	WT	SYP5GFP	1799700	58431.8
0.502681	0.36748	MP	Male	DLW241	2023_04_06_DLW241_male_01001_Statistics	35.33	WT	SYP5GFP	2169360	61402.8
0.59844	0.489272	MP	Male	DLW241	2023_04_06_DLW241_male_01001_Statistics	41.37	WT	SYP5GFP	3002550	72578
0.553857	0.432569	MP	Male	DLW241	2023_04_06_DLW241_male_01001_Statistics	32.93	WT	SYP5GFP	2057250	62473.4
0.572425	0.456184	MP	Male	DLW241	2023_04_06_DLW241_male_01001_Statistics	40.81	WT	SYP5GFP	2792250	68420.7
0.523384	0.393811	MP	Male	DLW241	2023_04_06_DLW241_male_01001_Statistics	33.08	WT	SYP5GFP	1886890	57040.2
0.540966	0.416173	MP	Male	DLW241	2023_04_06_DLW241_male_01001_Statistics	34.99	WT	SYP5GFP	2323180	66395.5
0.587534	0.475402	MP	Male	DLW241	2023_04_06_DLW241_male_01001_Statistics	38.37	WT	SYP5GFP	2546790	66374.5
0.620076	0.51679	MP	Male	DLW241	2023_04_06_DLW241_male_01001_Statistics	41.25	WT	SYP5GFP	2965730	71896.5
0.636351	0.53749	MP	Male	DLW241	2023_04_06_DLW241_male_01001_Statistics	45.75	WT	SYP5GFP	3065370	67002.6
0.654716	0.560848	MP	Male	DLW241	2023_04_06_DLW241_male_01001_Statistics	21.28	WT	SYP5GFP	1641050	77117
0.652823	0.55844	MP	Male	DLW241	2023_04_06_DLW241_male_01001_Statistics	45.37	WT	SYP5GFP	3612570	79624.6
0.690118	0.605874	MP	Male	DLW241	2023_04_06_DLW241_male_01001_Statistics	37.62	WT	SYP5GFP	2740170	72838.1
0.673849	0.585181	MP	Male	DLW241	2023_04_06_DLW241_male_01001_Statistics	47.97	WT	SYP5GFP	3468010	72295.4
0.722301	0.646806	MP	Male	DLW241	2023_04_06_DLW241_male_01001_Statistics	55.77	WT	SYP5GFP	4785530	85808.3
0.702076	0.621083	MP	Male	DLW241	2023_04_06_DLW241_male_01001_Statistics	41.03	WT	SYP5GFP	2750610	67039
0.771149	0.708933	LP	Male	DLW241	2023_04_06_DLW241_male_01001_Statistics	51.42	WT	SYP5GFP	4442270	86391.9
0.804475	0.751319	LP	Male	DLW241	2023_04_06_DLW241_male_01001_Statistics	56.3	WT	SYP5GFP	5333440	94732.5
0.823621	0.775671	LP	Male	DLW241	2023_04_06_DLW241_male_01001_Statistics	56.59	WT	SYP5GFP	5410730	95612.8
0.85271	0.812668	LP	Male	DLW241	2023_04_06_DLW241_male_01001_Statistics	51.31	WT	SYP5GFP	5041020	98246.3
0.887129	0.856444	LP	Male	DLW241	2023_04_06_DLW241_male_01001_Statistics	54.08	WT	SYP5GFP	4710220	87097.3
0.914321	0.891028	LP	Male	DLW241	2023_04_06_DLW241_male_01001_Statistics	58.58	WT	SYP5GFP	5364060	91568.1
0.927899	0.908297	LP	Male	DLW241	2023_04_06_DLW241_male_01001_Statistics	58.02	WT	SYP5GFP	5393170	92953.6
0.944234	0.929074	LP	Male	DLW241	2023_04_06_DLW241_male_01001_Statistics	53.96	WT	SYP5GFP	5000810	92676.2
0.963248	0.953257	LP	Male	DLW241	2023_04_06_DLW241_male_01001_Statistics	59.94	WT	SYP5GFP	5390880	89937.9
0.978756	0.972981	LP	Male	DLW241	2023_04_06_DLW241_male_01001_Statistics	54.88	WT	SYP5GFP	5622190	102445
0.997751	0.99714	LP	Male	DLW241	2023_04_06_DLW241_male_01001_Statistics	50.44	WT	SYP5GFP	4715360	93484.5
0.0648986	-0.307739	TZ	Male	DLW241	2023_04_06_DLW241_male_01002_Statistics	10.64	WT	SYP5GFP	507320	47680.5
0.0352142	-0.349252	TZ	Male	DLW241	2023_04_06_DLW241_male_01002_Statistics	7.38	WT	SYP5GFP	345361	46796.9
0.0427767	-0.338676	TZ	Male	DLW241	2023_04_06_DLW241_male_01002_Statistics	7.7	WT	SYP5GFP	361649	46967.4
0.0711392	-0.299011	TZ	Male	DLW241	2023_04_06_DLW241_male_01002_Statistics	16.44	WT	SYP5GFP	812882	49445.4
0.0914947	-0.270544	TZ	Male	DLW241	2023_04_06_DLW241_male_01002_Statistics	15.82	WT	SYP5GFP	806169	50958.8
0.0877576	-0.27577	TZ	Male	DLW241	2023_04_06_DLW241_male_01002_Statistics	6.91	WT	SYP5GFP	326141	47198.4
0.106265	-0.249888	TZ	Male	DLW241	2023_04_06_DLW241_male_01002_Statistics	8.78	WT	SYP5GFP	394400	44920.3
0.137213	-0.206606	TZ	Male	DLW241	2023_04_06_DLW241_male_01002_Statistics	11.02	WT	SYP5GFP	502437	45593.2
0.185629	-0.138897	TZ	Male	DLW241	2023_04_06_DLW241_male_01002_Statistics	12.41	WT	SYP5GFP	612877	49385.7
0.227178	-0.0807903	TZ	Male	DLW241	2023_04_06_DLW241_male_01002_Statistics	15.44	WT	SYP5GFP	798173	51695.1
0.271712	-0.0185104	TZ	Male	DLW241	2023_04_06_DLW241_male_01002_Statistics	20.64	WT	SYP5GFP	1119430	54235.9
0.20335	-0.114114	TZ	Male	DLW241	2023_04_06_DLW241_male_01002_Statistics	16.47	WT	SYP5GFP	844826	51294.8
0.24742	-0.0524818	TZ	Male	DLW241	2023_04_06_DLW241_male_01002_Statistics	18.07	WT	SYP5GFP	924620	51168.8
0.220177	-0.0905823	TZ	Male	DLW241	2023_04_06_DLW241_male_01002_Statistics	23.4	WT	SYP5GFP	1219110	52098.7
0.323629	0.0540952	EP	Male	DLW241	2023_04_06_DLW241_male_01002_Statistics	30.61	WT	SYP5GFP	1697590	55458.7
0.29296	0.0112055	EP	Male	DLW241	2023_04_06_DLW241_male_01002_Statistics	26.53	WT	SYP5GFP	1469350	55384.5
0.371812	0.12148	EP	Male	DLW241	2023_04_06_DLW241_male_01002_Statistics	21.85	WT	SYP5GFP	1170160	53554.2
0.351616	0.0932355	EP	Male	DLW241	2023_04_06_DLW241_male_01002_Statistics	24.28	WT	SYP5GFP	1291930	53209.6
0.432964	0.207001	EP	Male	DLW241	2023_04_06_DLW241_male_01002_Statistics	20.28	WT	SYP5GFP	1019320	50262.3
0.464705	0.251391	EP	Male	DLW241	2023_04_06_DLW241_male_01002_Statistics	37.26	WT	SYP5GFP	1969230	52851
0.463511	0.249721	EP	Male	DLW241	2023_04_06_DLW241_male_01002_Statistics	36.8	WT	SYP5GFP	2089650	56784
0.494945	0.29368	EP	Male	DLW241	2023_04_06_DLW241_male_01002_Statistics	42.18	WT	SYP5GFP	2408570	57102.2
0.432401	0.206214	EP	Male	DLW241	2023_04_06_DLW241_male_01002_Statistics	28.6	WT	SYP5GFP	1578480	55191.6
0.534409	0.348871	MP	Male	DLW241	2023_04_06_DLW241_male_01002_Statistics	39.32	WT	SYP5GFP	2399210	61017.5
0.575463	0.406286	MP	Male	DLW241	2023_04_06_DLW241_male_01002_Statistics	42.9	WT	SYP5GFP	2644590	61645.5
0.615958	0.462918	MP	Male	DLW241	2023_04_06_DLW241_male_01002_Statistics	51.62	WT	SYP5GFP	3396340	65795
0.589869	0.426432	MP	Male	DLW241	2023_04_06_DLW241_male_01002_Statistics	47.2	WT	SYP5GFP	3028040	64153.4
0.685508	0.560183	MP	Male	DLW241	2023_04_06_DLW241_male_01002_Statistics	50.57	WT	SYP5GFP	3085150	61007.5
0.669137	0.537288	MP	Male	DLW241	2023_04_06_DLW241_male_01002_Statistics	53.61	WT	SYP5GFP	3868990	72169.2
0.71532	0.601875	MP	Male	DLW241	2023_04_06_DLW241_male_01002_Statistics	55.75	WT	SYP5GFP	3878050	69561.4
0.764142	0.670153	LP	Male	DLW241	2023_04_06_DLW241_male_01002_Statistics	47.09	WT	SYP5GFP	3146310	66814.8
0.841477	0.778306	LP	Male	DLW241	2023_04_06_DLW241_male_01002_Statistics	54.58	WT	SYP5GFP	4154590	76119.3
0.814061	0.739964	LP	Male	DLW241	2023_04_06_DLW241_male_01002_Statistics	51.4	WT	SYP5GFP	3770840	73362.6
0.730596	0.623238	MP	Male	DLW241	2023_04_06_DLW241_male_01002_Statistics	46.42	WT	SYP5GFP	2876540	61967.7
0.786804	0.701846	LP	Male	DLW241	2023_04_06_DLW241_male_01002_Statistics	52.74	WT	SYP5GFP	4129610	78301.3
0.749868	0.65019	MP	Male	DLW241	2023_04_06_DLW241_male_01002_Statistics	52.89	WT	SYP5GFP	3737170	70659.3
0.947639	0.926773	LP	Male	DLW241	2023_04_06_DLW241_male_01002_Statistics	50.61	WT	SYP5GFP	3930360	77659.8
0.895484	0.853835	LP	Male	DLW241	2023_04_06_DLW241_male_01002_Statistics	49.65	WT	SYP5GFP	3403370	68547.2
0.937253	0.912248	LP	Male	DLW241	2023_04_06_DLW241_male_01002_Statistics	57.27	WT	SYP5GFP	4359950	76129.7
0.914705	0.880716	LP	Male	DLW241	2023_04_06_DLW241_male_01002_Statistics	50.67	WT	SYP5GFP	3738210	73775.6
0.886094	0.840702	LP	Male	DLW241	2023_04_06_DLW241_male_01002_Statistics	52.26	WT	SYP5GFP	3940500	75401.8
0.855932	0.798522	LP	Male	DLW241	2023_04_06_DLW241_male_01002_Statistics	49.83	WT	SYP5GFP	3693920	74130.4
0.984261	0.977988	LP	Male	DLW241	2023_04_06_DLW241_male_01002_Statistics	60.96	WT	SYP5GFP	4358030	71490
0.079188	-0.185435	TZ	Male	DLW241	2023_04_06_DLW241_male_01003_Statistics	6.23	WT	SYP5GFP	299317	48044.5
0.090966	-0.170273	TZ	Male	DLW241	2023_04_06_DLW241_male_01003_Statistics	4.48	WT	SYP5GFP	202430	45185.3
0.110748	-0.144806	TZ	Male	DLW241	2023_04_06_DLW241_male_01003_Statistics	3.64	WT	SYP5GFP	175002	48077.5
0.0806783	-0.183517	TZ	Male	DLW241	2023_04_06_DLW241_male_01003_Statistics	2.67	WT	SYP5GFP	124900	46779
0.13459	-0.114112	TZ	Male	DLW241	2023_04_06_DLW241_male_01003_Statistics	9.82	WT	SYP5GFP	466237	47478.3
0.164995	-0.0749688	TZ	Male	DLW241	2023_04_06_DLW241_male_01003_Statistics	10.05	WT	SYP5GFP	479838	47745.1
0.199107	-0.0310537	TZ	Male	DLW241	2023_04_06_DLW241_male_01003_Statistics	11.4	WT	SYP5GFP	541038	47459.5
0.219768	-0.0044553	TZ	Male	DLW241	2023_04_06_DLW241_male_01003_Statistics	2.46	WT	SYP5GFP	113676	46209.8
0.219212	-0.00517195	TZ	Male	DLW241	2023_04_06_DLW241_male_01003_Statistics	10.6	WT	SYP5GFP	520975	49148.6
0.24625	0.029637	EP	Male	DLW241	2023_04_06_DLW241_male_01003_Statistics	10.08	WT	SYP5GFP	494297	49037.4
0.271206	0.0617645	EP	Male	DLW241	2023_04_06_DLW241_male_01003_Statistics	13.58	WT	SYP5GFP	677742	49907.4
0.296923	0.0948724	EP	Male	DLW241	2023_04_06_DLW241_male_01003_Statistics	19.34	WT	SYP5GFP	1055370	54569.3
0.326251	0.132629	EP	Male	DLW241	2023_04_06_DLW241_male_01003_Statistics	31.47	WT	SYP5GFP	1758450	55877
0.271258	0.0618322	EP	Male	DLW241	2023_04_06_DLW241_male_01003_Statistics	21.49	WT	SYP5GFP	1102790	51316.4
0.354345	0.168796	EP	Male	DLW241	2023_04_06_DLW241_male_01003_Statistics	29.03	WT	SYP5GFP	1636460	56371.3
0.315541	0.118841	EP	Male	DLW241	2023_04_06_DLW241_male_01003_Statistics	15.52	WT	SYP5GFP	847699	54619.8
0.40345	0.232013	EP	Male	DLW241	2023_04_06_DLW241_male_01003_Statistics	37.15	WT	SYP5GFP	2255200	60705.2
0.381277	0.203468	EP	Male	DLW241	2023_04_06_DLW241_male_01003_Statistics	35.52	WT	SYP5GFP	2265570	63782.9
0.412264	0.24336	EP	Male	DLW241	2023_04_06_DLW241_male_01003_Statistics	33.32	WT	SYP5GFP	2041010	61254.8
0.393781	0.219565	EP	Male	DLW241	2023_04_06_DLW241_male_01003_Statistics	22.97	WT	SYP5GFP	1225620	53357.4
0.434881	0.272477	EP	Male	DLW241	2023_04_06_DLW241_male_01003_Statistics	41.44	WT	SYP5GFP	2470710	59621.4
0.445691	0.286394	EP	Male	DLW241	2023_04_06_DLW241_male_01003_Statistics	35.56	WT	SYP5GFP	2222330	62495.2
0.433578	0.270799	EP	Male	DLW241	2023_04_06_DLW241_male_01003_Statistics	33.12	WT	SYP5GFP	1851640	55907
0.468492	0.315747	EP	Male	DLW241	2023_04_06_DLW241_male_01003_Statistics	43.78	WT	SYP5GFP	2985800	68200.1
0.517476	0.378808	MP	Male	DLW241	2023_04_06_DLW241_male_01003_Statistics	46.18	WT	SYP5GFP	3258340	70557.4
0.495577	0.350616	MP	Male	DLW241	2023_04_06_DLW241_male_01003_Statistics	46.96	WT	SYP5GFP	3271840	69672.9
0.473649	0.322386	EP	Male	DLW241	2023_04_06_DLW241_male_01003_Statistics	31.54	WT	SYP5GFP	1860820	58998.7
0.511572	0.371207	MP	Male	DLW241	2023_04_06_DLW241_male_01003_Statistics	37.68	WT	SYP5GFP	2210480	58664.5
0.529458	0.394233	MP	Male	DLW241	2023_04_06_DLW241_male_01003_Statistics	41.83	WT	SYP5GFP	2872660	68674.6
0.554989	0.427102	MP	Male	DLW241	2023_04_06_DLW241_male_01003_Statistics	44.1	WT	SYP5GFP	3325970	75418.8
0.592955	0.475978	MP	Male	DLW241	2023_04_06_DLW241_male_01003_Statistics	46.99	WT	SYP5GFP	3672940	78164.3
0.552641	0.424079	MP	Male	DLW241	2023_04_06_DLW241_male_01003_Statistics	36.1	WT	SYP5GFP	2258810	62570.9
0.574455	0.452162	MP	Male	DLW241	2023_04_06_DLW241_male_01003_Statistics	45.16	WT	SYP5GFP	3665350	81163.6
0.631668	0.525817	MP	Male	DLW241	2023_04_06_DLW241_male_01003_Statistics	52.82	WT	SYP5GFP	4369860	82731.2
0.588005	0.469606	MP	Male	DLW241	2023_04_06_DLW241_male_01003_Statistics	44.73	WT	SYP5GFP	3075170	68749.6
0.614316	0.503478	MP	Male	DLW241	2023_04_06_DLW241_male_01003_Statistics	51.55	WT	SYP5GFP	4256950	82579
0.626315	0.518925	MP	Male	DLW241	2023_04_06_DLW241_male_01003_Statistics	50.66	WT	SYP5GFP	3454790	68195.6
0.650343	0.549858	MP	Male	DLW241	2023_04_06_DLW241_male_01003_Statistics	50.67	WT	SYP5GFP	4171340	82323.7
0.66113	0.563745	MP	Male	DLW241	2023_04_06_DLW241_male_01003_Statistics	54.55	WT	SYP5GFP	4351220	79765.7
0.668814	0.573637	MP	Male	DLW241	2023_04_06_DLW241_male_01003_Statistics	48.91	WT	SYP5GFP	3425210	70030.9
0.687384	0.597545	MP	Male	DLW241	2023_04_06_DLW241_male_01003_Statistics	51.57	WT	SYP5GFP	4487190	87011.6
0.718379	0.637447	MP	Male	DLW241	2023_04_06_DLW241_male_01003_Statistics	58.08	WT	SYP5GFP	5126060	88258.6
0.70238	0.616849	MP	Male	DLW241	2023_04_06_DLW241_male_01003_Statistics	49.61	WT	SYP5GFP	3611420	72796.2
0.754776	0.684304	LP	Male	DLW241	2023_04_06_DLW241_male_01003_Statistics	60.98	WT	SYP5GFP	5291520	86774.7
0.735809	0.659886	MP	Male	DLW241	2023_04_06_DLW241_male_01003_Statistics	45.97	WT	SYP5GFP	3145250	68419.6
0.737437	0.661982	MP	Male	DLW241	2023_04_06_DLW241_male_01003_Statistics	55.52	WT	SYP5GFP	4662770	83983.6
0.769906	0.703782	LP	Male	DLW241	2023_04_06_DLW241_male_01003_Statistics	54.27	WT	SYP5GFP	4956420	91328.9
0.765861	0.698574	LP	Male	DLW241	2023_04_06_DLW241_male_01003_Statistics	52.62	WT	SYP5GFP	4125950	78410.3
0.799091	0.741354	LP	Male	DLW241	2023_04_06_DLW241_male_01003_Statistics	42.24	WT	SYP5GFP	3193910	75613.4
0.811373	0.757165	LP	Male	DLW241	2023_04_06_DLW241_male_01003_Statistics	54.82	WT	SYP5GFP	4898360	89353.5
0.796579	0.73812	LP	Male	DLW241	2023_04_06_DLW241_male_01003_Statistics	56.71	WT	SYP5GFP	5073320	89460.8
0.826592	0.776758	LP	Male	DLW241	2023_04_06_DLW241_male_01003_Statistics	60.33	WT	SYP5GFP	5595370	92746.1
0.844566	0.799898	LP	Male	DLW241	2023_04_06_DLW241_male_01003_Statistics	62.38	WT	SYP5GFP	6103890	97850.1
0.827356	0.777741	LP	Male	DLW241	2023_04_06_DLW241_male_01003_Statistics	54.73	WT	SYP5GFP	3854670	70430.7
0.859817	0.819531	LP	Male	DLW241	2023_04_06_DLW241_male_01003_Statistics	52.36	WT	SYP5GFP	4739390	90515.5
0.861709	0.821967	LP	Male	DLW241	2023_04_06_DLW241_male_01003_Statistics	51.12	WT	SYP5GFP	4037790	78986.5
0.881354	0.847258	LP	Male	DLW241	2023_04_06_DLW241_male_01003_Statistics	60.25	WT	SYP5GFP	5298270	87938.1
0.858124	0.817351	LP	Male	DLW241	2023_04_06_DLW241_male_01003_Statistics	52.7	WT	SYP5GFP	3405960	64629.2
0.896946	0.86733	LP	Male	DLW241	2023_04_06_DLW241_male_01003_Statistics	61.17	WT	SYP5GFP	5748090	93969.1
0.893792	0.863269	LP	Male	DLW241	2023_04_06_DLW241_male_01003_Statistics	56.31	WT	SYP5GFP	4166510	73992.4
0.920511	0.897668	LP	Male	DLW241	2023_04_06_DLW241_male_01003_Statistics	61.25	WT	SYP5GFP	5788230	94501.7
0.931008	0.911181	LP	Male	DLW241	2023_04_06_DLW241_male_01003_Statistics	52.35	WT	SYP5GFP	4948970	94536.2
0.919655	0.896566	LP	Male	DLW241	2023_04_06_DLW241_male_01003_Statistics	51.37	WT	SYP5GFP	4194290	81648.6
0.782361	0.719815	LP	Male	DLW241	2023_04_06_DLW241_male_01003_Statistics	51.78	WT	SYP5GFP	4711410	90989
0.949126	0.934506	LP	Male	DLW241	2023_04_06_DLW241_male_01003_Statistics	51.8	WT	SYP5GFP	5279040	101912
0.964458	0.954244	LP	Male	DLW241	2023_04_06_DLW241_male_01003_Statistics	51.53	WT	SYP5GFP	4526280	87837.8
0.996204	0.995113	LP	Male	DLW241	2023_04_06_DLW241_male_01003_Statistics	48.82	WT	SYP5GFP	4853430	99414.8
0.975163	0.968025	LP	Male	DLW241	2023_04_06_DLW241_male_01003_Statistics	61	WT	SYP5GFP	5392960	88409.2
0.96412	0.953809	LP	Male	DLW241	2023_04_06_DLW241_male_01003_Statistics	51.11	WT	SYP5GFP	4393350	85958.7
0.134897	-0.163544	TZ	Male	DLW241	2023_04_06_DLW241_male_01004_Statistics	8.66	WT	SYP5GFP	382637	44184.4
0.135688	-0.16248	TZ	Male	DLW241	2023_04_06_DLW241_male_01004_Statistics	7.36	WT	SYP5GFP	368506	50068.8
0.16057	-0.129014	TZ	Male	DLW241	2023_04_06_DLW241_male_01004_Statistics	9.12	WT	SYP5GFP	417256	45751.8
0.188265	-0.0917652	TZ	Male	DLW241	2023_04_06_DLW241_male_01004_Statistics	15.09	WT	SYP5GFP	721216	47794.3
0.194849	-0.0829094	TZ	Male	DLW241	2023_04_06_DLW241_male_01004_Statistics	22.6	WT	SYP5GFP	1216710	53836.7
0.231414	-0.0337305	TZ	Male	DLW241	2023_04_06_DLW241_male_01004_Statistics	14.62	WT	SYP5GFP	712329	48722.9
0.255545	-0.00127516	TZ	Male	DLW241	2023_04_06_DLW241_male_01004_Statistics	19.25	WT	SYP5GFP	976370	50720.5
0.242763	-0.0184662	TZ	Male	DLW241	2023_04_06_DLW241_male_01004_Statistics	19.72	WT	SYP5GFP	1095870	55571.5
0.285939	0.0396044	EP	Male	DLW241	2023_04_06_DLW241_male_01004_Statistics	26.42	WT	SYP5GFP	1276080	48299.8
0.30429	0.064286	EP	Male	DLW241	2023_04_06_DLW241_male_01004_Statistics	24.85	WT	SYP5GFP	1356090	54571
0.318631	0.0835747	EP	Male	DLW241	2023_04_06_DLW241_male_01004_Statistics	26.79	WT	SYP5GFP	1446470	53992.9
0.371691	0.154939	EP	Male	DLW241	2023_04_06_DLW241_male_01004_Statistics	20.04	WT	SYP5GFP	985671	49185.2
0.341266	0.114018	EP	Male	DLW241	2023_04_06_DLW241_male_01004_Statistics	30.67	WT	SYP5GFP	1744360	56875.1
0.355837	0.133615	EP	Male	DLW241	2023_04_06_DLW241_male_01004_Statistics	28.41	WT	SYP5GFP	1798380	63301
0.384473	0.172131	EP	Male	DLW241	2023_04_06_DLW241_male_01004_Statistics	41.67	WT	SYP5GFP	2639310	63338.4
0.426944	0.229253	EP	Male	DLW241	2023_04_06_DLW241_male_01004_Statistics	39.45	WT	SYP5GFP	2374820	60198.2
0.458189	0.271276	EP	Male	DLW241	2023_04_06_DLW241_male_01004_Statistics	42.59	WT	SYP5GFP	2395710	56250.5
0.506297	0.335981	MP	Male	DLW241	2023_04_06_DLW241_male_01004_Statistics	45.87	WT	SYP5GFP	2719650	59290.4
0.466699	0.282722	EP	Male	DLW241	2023_04_06_DLW241_male_01004_Statistics	46.02	WT	SYP5GFP	2954830	64207.5
0.491996	0.316746	EP	Male	DLW241	2023_04_06_DLW241_male_01004_Statistics	44.07	WT	SYP5GFP	2759680	62620.4
0.547121	0.390888	MP	Male	DLW241	2023_04_06_DLW241_male_01004_Statistics	47.52	WT	SYP5GFP	2977570	62659.3
0.528916	0.366403	MP	Male	DLW241	2023_04_06_DLW241_male_01004_Statistics	50.62	WT	SYP5GFP	3201810	63251.9
0.589598	0.448019	MP	Male	DLW241	2023_04_06_DLW241_male_01004_Statistics	46.14	WT	SYP5GFP	3147890	68224.8
0.643408	0.520392	MP	Male	DLW241	2023_04_06_DLW241_male_01004_Statistics	47.01	WT	SYP5GFP	2925810	62238
0.61922	0.48786	MP	Male	DLW241	2023_04_06_DLW241_male_01004_Statistics	50.34	WT	SYP5GFP	3313340	65819.2
0.616128	0.483701	MP	Male	DLW241	2023_04_06_DLW241_male_01004_Statistics	54.48	WT	SYP5GFP	4098340	75226.5
0.661361	0.544538	MP	Male	DLW241	2023_04_06_DLW241_male_01004_Statistics	58.55	WT	SYP5GFP	4342750	74171.6
0.68948	0.582358	MP	Male	DLW241	2023_04_06_DLW241_male_01004_Statistics	51.34	WT	SYP5GFP	3086830	60125.2
0.731641	0.639063	MP	Male	DLW241	2023_04_06_DLW241_male_01004_Statistics	48.25	WT	SYP5GFP	2948470	61108.2
0.71074	0.610952	MP	Male	DLW241	2023_04_06_DLW241_male_01004_Statistics	62.28	WT	SYP5GFP	4845560	77802.8
0.766727	0.686254	LP	Male	DLW241	2023_04_06_DLW241_male_01004_Statistics	58.12	WT	SYP5GFP	3922230	67485
0.751008	0.665111	MP	Male	DLW241	2023_04_06_DLW241_male_01004_Statistics	52.02	WT	SYP5GFP	3862490	74250.1
0.801019	0.732375	LP	Male	DLW241	2023_04_06_DLW241_male_01004_Statistics	43.62	WT	SYP5GFP	2726600	62508
0.79445	0.72354	LP	Male	DLW241	2023_04_06_DLW241_male_01004_Statistics	52.9	WT	SYP5GFP	3663630	69255.8
0.826167	0.766198	LP	Male	DLW241	2023_04_06_DLW241_male_01004_Statistics	54.58	WT	SYP5GFP	3806100	69734.3
0.864356	0.817562	LP	Male	DLW241	2023_04_06_DLW241_male_01004_Statistics	60	WT	SYP5GFP	4519300	75321.7
0.913308	0.883401	LP	Male	DLW241	2023_04_06_DLW241_male_01004_Statistics	55.2	WT	SYP5GFP	3611320	65422.5
0.901383	0.867363	LP	Male	DLW241	2023_04_06_DLW241_male_01004_Statistics	56.33	WT	SYP5GFP	3796720	67401.4
0.96252	0.94959	LP	Male	DLW241	2023_04_06_DLW241_male_01004_Statistics	59.79	WT	SYP5GFP	3798210	63525.8
0.946251	0.927709	LP	Male	DLW241	2023_04_06_DLW241_male_01004_Statistics	57.93	WT	SYP5GFP	3984840	68787.2
0.964683	0.952499	LP	Male	DLW241	2023_04_06_DLW241_male_01004_Statistics	49.12	WT	SYP5GFP	3890060	79195
0.986617	0.982001	LP	Male	DLW241	2023_04_06_DLW241_male_01004_Statistics	60.66	WT	SYP5GFP	4044370	66672.8
1	1	LP	Male	DLW241	2023_04_06_DLW241_male_01004_Statistics	52.34	WT	SYP5GFP	3447820	65873.5
1	1	LP	Male	DLW241	2023_04_06_DLW241_male_01004_Statistics	53.18	WT	SYP5GFP	3976600	74776.2
0.0897674	-0.383427	TZ	Male	DLW241	2023_04_06_DLW241_male_01005_Statistics	8.09	WT	SYP5GFP	424529	52475.8
0.136571	-0.312293	TZ	Male	DLW241	2023_04_06_DLW241_male_01005_Statistics	9.63	WT	SYP5GFP	489322	50812.3
0.143896	-0.301159	TZ	Male	DLW241	2023_04_06_DLW241_male_01005_Statistics	10	WT	SYP5GFP	519233	51923.3
0.181013	-0.244747	TZ	Male	DLW241	2023_04_06_DLW241_male_01005_Statistics	9.56	WT	SYP5GFP	509894	53336.2
0.205527	-0.207488	TZ	Male	DLW241	2023_04_06_DLW241_male_01005_Statistics	15.42	WT	SYP5GFP	836801	54267.3
0.160989	-0.27518	TZ	Male	DLW241	2023_04_06_DLW241_male_01005_Statistics	13.76	WT	SYP5GFP	716195	52049.1
0.18426	-0.239812	TZ	Male	DLW241	2023_04_06_DLW241_male_01005_Statistics	8.86	WT	SYP5GFP	475751	53696.5
0.21573	-0.191981	TZ	Male	DLW241	2023_04_06_DLW241_male_01005_Statistics	10.21	WT	SYP5GFP	545869	53464.2
0.182042	-0.243182	TZ	Male	DLW241	2023_04_06_DLW241_male_01005_Statistics	10.88	WT	SYP5GFP	581563	53452.5
0.28697	-0.0837059	TZ	Male	DLW241	2023_04_06_DLW241_male_01005_Statistics	19.81	WT	SYP5GFP	1090760	55061.1
0.318172	-0.0362842	TZ	Male	DLW241	2023_04_06_DLW241_male_01005_Statistics	18.37	WT	SYP5GFP	1027610	55939.6
0.220186	-0.185209	TZ	Male	DLW241	2023_04_06_DLW241_male_01005_Statistics	13.19	WT	SYP5GFP	708416	53708.6
0.246052	-0.145896	TZ	Male	DLW241	2023_04_06_DLW241_male_01005_Statistics	14.87	WT	SYP5GFP	826858	55605.8
0.271136	-0.107773	TZ	Male	DLW241	2023_04_06_DLW241_male_01005_Statistics	14.7	WT	SYP5GFP	878224	59743.1
0.297602	-0.0675468	TZ	Male	DLW241	2023_04_06_DLW241_male_01005_Statistics	26.22	WT	SYP5GFP	1557490	59400.8
0.330348	-0.0177774	TZ	Male	DLW241	2023_04_06_DLW241_male_01005_Statistics	19.85	WT	SYP5GFP	1172100	59047.9
0.306679	-0.0537514	TZ	Male	DLW241	2023_04_06_DLW241_male_01005_Statistics	17.25	WT	SYP5GFP	1049110	60818
0.275387	-0.101311	TZ	Male	DLW241	2023_04_06_DLW241_male_01005_Statistics	18.85	WT	SYP5GFP	1025310	54393.1
0.240649	-0.154108	TZ	Male	DLW241	2023_04_06_DLW241_male_01005_Statistics	14.14	WT	SYP5GFP	756966	53533.7
0.338434	-0.00548824	TZ	Male	DLW241	2023_04_06_DLW241_male_01005_Statistics	19.08	WT	SYP5GFP	1078190	56508.9
0.367596	0.0388342	EP	Male	DLW241	2023_04_06_DLW241_male_01005_Statistics	30.87	WT	SYP5GFP	1862000	60317.5
0.404779	0.0953468	EP	Male	DLW241	2023_04_06_DLW241_male_01005_Statistics	28.25	WT	SYP5GFP	1616820	57232.6
0.39749	0.0842687	EP	Male	DLW241	2023_04_06_DLW241_male_01005_Statistics	31.74	WT	SYP5GFP	1884470	59372.1
0.359035	0.0258222	EP	Male	DLW241	2023_04_06_DLW241_male_01005_Statistics	28.88	WT	SYP5GFP	1727200	59806.1
0.435911	0.142663	EP	Male	DLW241	2023_04_06_DLW241_male_01005_Statistics	39.48	WT	SYP5GFP	2525270	63963.3
0.413076	0.107956	EP	Male	DLW241	2023_04_06_DLW241_male_01005_Statistics	28.99	WT	SYP5GFP	1767030	60953.1
0.384621	0.0647087	EP	Male	DLW241	2023_04_06_DLW241_male_01005_Statistics	24.04	WT	SYP5GFP	1373680	57141.4
0.476815	0.204831	EP	Male	DLW241	2023_04_06_DLW241_male_01005_Statistics	44.66	WT	SYP5GFP	3009990	67397.9
0.512915	0.259698	EP	Male	DLW241	2023_04_06_DLW241_male_01005_Statistics	43.32	WT	SYP5GFP	3073320	70944.6
0.548531	0.31383	EP	Male	DLW241	2023_04_06_DLW241_male_01005_Statistics	45.23	WT	SYP5GFP	3348440	74031.4
0.493535	0.230244	EP	Male	DLW241	2023_04_06_DLW241_male_01005_Statistics	40.89	WT	SYP5GFP	2679020	65517.7
0.586292	0.371221	MP	Male	DLW241	2023_04_06_DLW241_male_01005_Statistics	43.03	WT	SYP5GFP	3305830	76826.2
0.536003	0.294788	EP	Male	DLW241	2023_04_06_DLW241_male_01005_Statistics	39.54	WT	SYP5GFP	2712960	68613.1
0.580365	0.362213	MP	Male	DLW241	2023_04_06_DLW241_male_01005_Statistics	48.21	WT	SYP5GFP	3656560	75846.5
0.629709	0.43721	MP	Male	DLW241	2023_04_06_DLW241_male_01005_Statistics	53.66	WT	SYP5GFP	4162550	77572.7
0.669483	0.49766	MP	Male	DLW241	2023_04_06_DLW241_male_01005_Statistics	53.99	WT	SYP5GFP	4441050	82256.9
0.629416	0.436763	MP	Male	DLW241	2023_04_06_DLW241_male_01005_Statistics	45.72	WT	SYP5GFP	3402450	74419.3
0.672366	0.502041	MP	Male	DLW241	2023_04_06_DLW241_male_01005_Statistics	47.8	WT	SYP5GFP	3506650	73360.9
0.718394	0.571998	MP	Male	DLW241	2023_04_06_DLW241_male_01005_Statistics	44.11	WT	SYP5GFP	3112100	70553.2
0.712599	0.56319	MP	Male	DLW241	2023_04_06_DLW241_male_01005_Statistics	56.17	WT	SYP5GFP	4685830	83422.3
0.748483	0.617729	MP	Male	DLW241	2023_04_06_DLW241_male_01005_Statistics	43.97	WT	SYP5GFP	3766470	85660
0.760832	0.636497	MP	Male	DLW241	2023_04_06_DLW241_male_01005_Statistics	49.83	WT	SYP5GFP	3733970	74934.2
0.774927	0.65792	MP	Male	DLW241	2023_04_06_DLW241_male_01005_Statistics	50.39	WT	SYP5GFP	4584160	90973.6
0.807111	0.706836	LP	Male	DLW241	2023_04_06_DLW241_male_01005_Statistics	56.83	WT	SYP5GFP	5118060	90059.1
0.834853	0.749	LP	Male	DLW241	2023_04_06_DLW241_male_01005_Statistics	42.87	WT	SYP5GFP	3377070	78774.7
0.827723	0.738162	LP	Male	DLW241	2023_04_06_DLW241_male_01005_Statistics	59.76	WT	SYP5GFP	5893080	98612.4
0.862831	0.791523	LP	Male	DLW241	2023_04_06_DLW241_male_01005_Statistics	39.81	WT	SYP5GFP	2716780	68243.7
0.866794	0.797545	LP	Male	DLW241	2023_04_06_DLW241_male_01005_Statistics	61.29	WT	SYP5GFP	5504110	89804.4
0.903956	0.854026	LP	Male	DLW241	2023_04_06_DLW241_male_01005_Statistics	56.67	WT	SYP5GFP	5063420	89349.2
0.93289	0.898002	LP	Male	DLW241	2023_04_06_DLW241_male_01005_Statistics	57.52	WT	SYP5GFP	5503810	95685.2
0.940754	0.909954	LP	Male	DLW241	2023_04_06_DLW241_male_01005_Statistics	52.48	WT	SYP5GFP	4933490	94007.1
0.971538	0.956741	LP	Male	DLW241	2023_04_06_DLW241_male_01005_Statistics	58.03	WT	SYP5GFP	6043310	104141
0.111793	-0.155294	TZ	Male	DLW241	2023_04_06_DLW241_male_01006_Statistics	27.54	WT	SYP5GFP	1592650	57830.4
0.110919	-0.156431	TZ	Male	DLW241	2023_04_06_DLW241_male_01006_Statistics	11.41	WT	SYP5GFP	609478	53416.1
0.0885195	-0.185566	TZ	Male	DLW241	2023_04_06_DLW241_male_01006_Statistics	10.85	WT	SYP5GFP	579067	53370.2
0.0990613	-0.171854	TZ	Male	DLW241	2023_04_06_DLW241_male_01006_Statistics	9.3	WT	SYP5GFP	492961	53006.6
0.142198	-0.115746	TZ	Male	DLW241	2023_04_06_DLW241_male_01006_Statistics	5.5	WT	SYP5GFP	284411	51711.1
0.165359	-0.08562	TZ	Male	DLW241	2023_04_06_DLW241_male_01006_Statistics	9.13	WT	SYP5GFP	469184	51389.3
0.143495	-0.114059	TZ	Male	DLW241	2023_04_06_DLW241_male_01006_Statistics	4.61	WT	SYP5GFP	234492	50865.9
0.163959	-0.0874417	TZ	Male	DLW241	2023_04_06_DLW241_male_01006_Statistics	10.36	WT	SYP5GFP	552281	53309
0.186496	-0.0581277	TZ	Male	DLW241	2023_04_06_DLW241_male_01006_Statistics	37.79	WT	SYP5GFP	2426710	64215.7
0.229916	-0.0016512	TZ	Male	DLW241	2023_04_06_DLW241_male_01006_Statistics	11.26	WT	SYP5GFP	569907	50613.4
0.187653	-0.056623	TZ	Male	DLW241	2023_04_06_DLW241_male_01006_Statistics	8.61	WT	SYP5GFP	442229	51362.3
0.189084	-0.0547609	TZ	Male	DLW241	2023_04_06_DLW241_male_01006_Statistics	9.89	WT	SYP5GFP	497526	50306
0.26529	0.0443595	EP	Male	DLW241	2023_04_06_DLW241_male_01006_Statistics	17.78	WT	SYP5GFP	987818	55557.8
0.339983	0.141513	EP	Male	DLW241	2023_04_06_DLW241_male_01006_Statistics	23.64	WT	SYP5GFP	1367370	57841.4
0.302421	0.092656	EP	Male	DLW241	2023_04_06_DLW241_male_01006_Statistics	23.04	WT	SYP5GFP	1261670	54760
0.337825	0.138707	EP	Male	DLW241	2023_04_06_DLW241_male_01006_Statistics	20.46	WT	SYP5GFP	1148480	56132.9
0.342406	0.144665	EP	Male	DLW241	2023_04_06_DLW241_male_01006_Statistics	12.39	WT	SYP5GFP	647732	52278.6
0.30766	0.0994705	EP	Male	DLW241	2023_04_06_DLW241_male_01006_Statistics	18.12	WT	SYP5GFP	977393	53940
0.272719	0.0540229	EP	Male	DLW241	2023_04_06_DLW241_male_01006_Statistics	17.07	WT	SYP5GFP	891803	52243.9
0.439885	0.271457	EP	Male	DLW241	2023_04_06_DLW241_male_01006_Statistics	30.05	WT	SYP5GFP	1804180	60039.3
0.408211	0.230258	EP	Male	DLW241	2023_04_06_DLW241_male_01006_Statistics	28.62	WT	SYP5GFP	1766290	61715.2
0.442475	0.274826	EP	Male	DLW241	2023_04_06_DLW241_male_01006_Statistics	39.83	WT	SYP5GFP	2380780	59773.5
0.401579	0.221632	EP	Male	DLW241	2023_04_06_DLW241_male_01006_Statistics	25.79	WT	SYP5GFP	1518190	58867.4
0.379368	0.192742	EP	Male	DLW241	2023_04_06_DLW241_male_01006_Statistics	20.7	WT	SYP5GFP	1172130	56624.6
0.480661	0.324494	EP	Male	DLW241	2023_04_06_DLW241_male_01006_Statistics	35.89	WT	SYP5GFP	2339390	65182.2
0.514586	0.36862	MP	Male	DLW241	2023_04_06_DLW241_male_01006_Statistics	36.14	WT	SYP5GFP	2397260	66332.6
0.544754	0.40786	MP	Male	DLW241	2023_04_06_DLW241_male_01006_Statistics	38.12	WT	SYP5GFP	2627390	68924.2
0.57346	0.445198	MP	Male	DLW241	2023_04_06_DLW241_male_01006_Statistics	45.08	WT	SYP5GFP	3361250	74561.9
0.484312	0.329243	EP	Male	DLW241	2023_04_06_DLW241_male_01006_Statistics	39.78	WT	SYP5GFP	2578320	64814.5
0.525982	0.383443	MP	Male	DLW241	2023_04_06_DLW241_male_01006_Statistics	36.73	WT	SYP5GFP	2454370	66821.9
0.554288	0.420261	MP	Male	DLW241	2023_04_06_DLW241_male_01006_Statistics	30.85	WT	SYP5GFP	1934640	62711.2
0.503127	0.353715	MP	Male	DLW241	2023_04_06_DLW241_male_01006_Statistics	29.17	WT	SYP5GFP	1694390	58086.7
0.695324	0.603706	MP	Male	DLW241	2023_04_06_DLW241_male_01006_Statistics	57.85	WT	SYP5GFP	4306950	74450.3
0.660444	0.558339	MP	Male	DLW241	2023_04_06_DLW241_male_01006_Statistics	54.04	WT	SYP5GFP	4248470	78617.1
0.591561	0.468742	MP	Male	DLW241	2023_04_06_DLW241_male_01006_Statistics	45.62	WT	SYP5GFP	3333750	73076.5
0.689608	0.596272	MP	Male	DLW241	2023_04_06_DLW241_male_01006_Statistics	52.39	WT	SYP5GFP	4109270	78436.2
0.650669	0.545624	MP	Male	DLW241	2023_04_06_DLW241_male_01006_Statistics	46.07	WT	SYP5GFP	3319400	72051.2
0.61106	0.494105	MP	Male	DLW241	2023_04_06_DLW241_male_01006_Statistics	43.07	WT	SYP5GFP	3219030	74739.5
0.599951	0.479655	MP	Male	DLW241	2023_04_06_DLW241_male_01006_Statistics	40.39	WT	SYP5GFP	2622670	64933.6
0.639483	0.531074	MP	Male	DLW241	2023_04_06_DLW241_male_01006_Statistics	39.7	WT	SYP5GFP	2397460	60389.4
0.679945	0.583704	MP	Male	DLW241	2023_04_06_DLW241_male_01006_Statistics	47.59	WT	SYP5GFP	3064090	64385.2
0.821142	0.767359	LP	Male	DLW241	2023_04_06_DLW241_male_01006_Statistics	53.7	WT	SYP5GFP	4563190	84975.6
0.785921	0.721547	LP	Male	DLW241	2023_04_06_DLW241_male_01006_Statistics	58.12	WT	SYP5GFP	4829110	83088.6
0.748637	0.673051	LP	Male	DLW241	2023_04_06_DLW241_male_01006_Statistics	61.51	WT	SYP5GFP	4948700	80453.6
0.802245	0.74278	LP	Male	DLW241	2023_04_06_DLW241_male_01006_Statistics	48.56	WT	SYP5GFP	4047740	83355.4
0.824572	0.77182	LP	Male	DLW241	2023_04_06_DLW241_male_01006_Statistics	44.31	WT	SYP5GFP	2953660	66659
0.766412	0.696171	LP	Male	DLW241	2023_04_06_DLW241_male_01006_Statistics	46.02	WT	SYP5GFP	3654460	79410.3
0.785769	0.721349	LP	Male	DLW241	2023_04_06_DLW241_male_01006_Statistics	45.98	WT	SYP5GFP	3198920	69572
0.724352	0.641463	MP	Male	DLW241	2023_04_06_DLW241_male_01006_Statistics	49.56	WT	SYP5GFP	3930010	79298
0.747098	0.67105	LP	Male	DLW241	2023_04_06_DLW241_male_01006_Statistics	53.05	WT	SYP5GFP	3792730	71493.5
0.929942	0.908876	LP	Male	DLW241	2023_04_06_DLW241_male_01006_Statistics	53.77	WT	SYP5GFP	4993390	92865.7
0.96658	0.95653	LP	Male	DLW241	2023_04_06_DLW241_male_01006_Statistics	48.72	WT	SYP5GFP	4614540	94715.5
0.999705	0.999616	LP	Male	DLW241	2023_04_06_DLW241_male_01006_Statistics	49.25	WT	SYP5GFP	4760550	96660.9
0.896092	0.864846	LP	Male	DLW241	2023_04_06_DLW241_male_01006_Statistics	53.29	WT	SYP5GFP	4840280	90829
0.861116	0.819353	LP	Male	DLW241	2023_04_06_DLW241_male_01006_Statistics	51.79	WT	SYP5GFP	4049070	78182.5
0.906767	0.878731	LP	Male	DLW241	2023_04_06_DLW241_male_01006_Statistics	49.73	WT	SYP5GFP	4735260	95219.4
0.940912	0.923145	LP	Male	DLW241	2023_04_06_DLW241_male_01006_Statistics	51.04	WT	SYP5GFP	4544500	89038
0.873082	0.834918	LP	Male	DLW241	2023_04_06_DLW241_male_01006_Statistics	50.55	WT	SYP5GFP	4354580	86144
0.971379	0.962773	LP	Male	DLW241	2023_04_06_DLW241_male_01006_Statistics	46.82	WT	SYP5GFP	3818500	81557
0.9153	0.889831	LP	Male	DLW241	2023_04_06_DLW241_male_01006_Statistics	40.49	WT	SYP5GFP	3401320	84004
0.94282	0.925626	LP	Male	DLW241	2023_04_06_DLW241_male_01006_Statistics	43.13	WT	SYP5GFP	3353550	77754.5
0.888261	0.85466	LP	Male	DLW241	2023_04_06_DLW241_male_01006_Statistics	42.07	WT	SYP5GFP	3001070	71335.2
0.839933	0.791801	LP	Male	DLW241	2023_04_06_DLW241_male_01006_Statistics	49.82	WT	SYP5GFP	4123570	82769.4
0.853789	0.809823	LP	Male	DLW241	2023_04_06_DLW241_male_01006_Statistics	35.17	WT	SYP5GFP	2460150	69950.2
0.132915	-0.00584592	TZ	Herm	DLW249	2023_04_06_DLW249_syp5gfp_herm_01_Statistics	11.61	syp-3het	SYP5GFP	537697	46313.3
0.119643	-0.0212419	TZ	Herm	DLW249	2023_04_06_DLW249_syp5gfp_herm_01_Statistics	11.33	syp-3het	SYP5GFP	523137	46172.7
0.111968	-0.0301451	TZ	Herm	DLW249	2023_04_06_DLW249_syp5gfp_herm_01_Statistics	10.79	syp-3het	SYP5GFP	517495	47960.6
0.0951825	-0.049617	TZ	Herm	DLW249	2023_04_06_DLW249_syp5gfp_herm_01_Statistics	12.3	syp-3het	SYP5GFP	550182	44730.2
0.0811968	-0.0658409	TZ	Herm	DLW249	2023_04_06_DLW249_syp5gfp_herm_01_Statistics	6.42	syp-3het	SYP5GFP	307204	47851.1
0.286465	0.172276	EP	Herm	DLW249	2023_04_06_DLW249_syp5gfp_herm_01_Statistics	29.91	syp-3het	SYP5GFP	1550450	51837.2
0.283011	0.16827	EP	Herm	DLW249	2023_04_06_DLW249_syp5gfp_herm_01_Statistics	14.36	syp-3het	SYP5GFP	735846	51242.8
0.264953	0.147322	EP	Herm	DLW249	2023_04_06_DLW249_syp5gfp_herm_01_Statistics	13.35	syp-3het	SYP5GFP	668489	50074.1
0.275471	0.159523	EP	Herm	DLW249	2023_04_06_DLW249_syp5gfp_herm_01_Statistics	14.15	syp-3het	SYP5GFP	688137	48631.6
0.2678	0.150624	EP	Herm	DLW249	2023_04_06_DLW249_syp5gfp_herm_01_Statistics	15.21	syp-3het	SYP5GFP	800333	52618.9
0.239447	0.117735	EP	Herm	DLW249	2023_04_06_DLW249_syp5gfp_herm_01_Statistics	18.87	syp-3het	SYP5GFP	893282	47338.7
0.255042	0.135825	EP	Herm	DLW249	2023_04_06_DLW249_syp5gfp_herm_01_Statistics	15.98	syp-3het	SYP5GFP	841786	52677.5
0.247654	0.127255	EP	Herm	DLW249	2023_04_06_DLW249_syp5gfp_herm_01_Statistics	14.95	syp-3het	SYP5GFP	769904	51498.6
0.224487	0.100381	EP	Herm	DLW249	2023_04_06_DLW249_syp5gfp_herm_01_Statistics	16.36	syp-3het	SYP5GFP	789230	48241.4
0.235215	0.112825	EP	Herm	DLW249	2023_04_06_DLW249_syp5gfp_herm_01_Statistics	18.42	syp-3het	SYP5GFP	888474	48234.2
0.212325	0.0862719	EP	Herm	DLW249	2023_04_06_DLW249_syp5gfp_herm_01_Statistics	17.14	syp-3het	SYP5GFP	929434	54226
0.222357	0.0979093	EP	Herm	DLW249	2023_04_06_DLW249_syp5gfp_herm_01_Statistics	22.86	syp-3het	SYP5GFP	1160750	50776.5
0.197851	0.0694815	EP	Herm	DLW249	2023_04_06_DLW249_syp5gfp_herm_01_Statistics	13.03	syp-3het	SYP5GFP	628068	48201.7
0.212353	0.086305	EP	Herm	DLW249	2023_04_06_DLW249_syp5gfp_herm_01_Statistics	18.3	syp-3het	SYP5GFP	926562	50631.8
0.199722	0.0716518	EP	Herm	DLW249	2023_04_06_DLW249_syp5gfp_herm_01_Statistics	13.3	syp-3het	SYP5GFP	650933	48942.3
0.184976	0.0545458	EP	Herm	DLW249	2023_04_06_DLW249_syp5gfp_herm_01_Statistics	19.67	syp-3het	SYP5GFP	905998	46059.9
0.178821	0.0474066	EP	Herm	DLW249	2023_04_06_DLW249_syp5gfp_herm_01_Statistics	17.28	syp-3het	SYP5GFP	818473	47365.3
0.179751	0.0484854	EP	Herm	DLW249	2023_04_06_DLW249_syp5gfp_herm_01_Statistics	12.4	syp-3het	SYP5GFP	573977	46288.5
0.158806	0.0241879	EP	Herm	DLW249	2023_04_06_DLW249_syp5gfp_herm_01_Statistics	15.26	syp-3het	SYP5GFP	714477	46820.2
0.158447	0.0237712	EP	Herm	DLW249	2023_04_06_DLW249_syp5gfp_herm_01_Statistics	16.23	syp-3het	SYP5GFP	803006	49476.6
0.158999	0.0244122	EP	Herm	DLW249	2023_04_06_DLW249_syp5gfp_herm_01_Statistics	16.23	syp-3het	SYP5GFP	759687	46807.6
0.142085	0.00479144	EP	Herm	DLW249	2023_04_06_DLW249_syp5gfp_herm_01_Statistics	11.66	syp-3het	SYP5GFP	561948	48194.5
0.405418	0.310267	EP	Herm	DLW249	2023_04_06_DLW249_syp5gfp_herm_01_Statistics	36.21	syp-3het	SYP5GFP	2094530	57844
0.416421	0.32303	EP	Herm	DLW249	2023_04_06_DLW249_syp5gfp_herm_01_Statistics	29.39	syp-3het	SYP5GFP	1715300	58363.4
0.405161	0.309968	EP	Herm	DLW249	2023_04_06_DLW249_syp5gfp_herm_01_Statistics	35.71	syp-3het	SYP5GFP	2118780	59333
0.394611	0.297729	EP	Herm	DLW249	2023_04_06_DLW249_syp5gfp_herm_01_Statistics	37.37	syp-3het	SYP5GFP	2257300	60404.1
0.39748	0.301057	EP	Herm	DLW249	2023_04_06_DLW249_syp5gfp_herm_01_Statistics	39.12	syp-3het	SYP5GFP	2498330	63863.2
0.386688	0.288539	EP	Herm	DLW249	2023_04_06_DLW249_syp5gfp_herm_01_Statistics	28.44	syp-3het	SYP5GFP	1671100	58758.8
0.376099	0.276255	EP	Herm	DLW249	2023_04_06_DLW249_syp5gfp_herm_01_Statistics	32.01	syp-3het	SYP5GFP	1860560	58124.3
0.392068	0.29478	EP	Herm	DLW249	2023_04_06_DLW249_syp5gfp_herm_01_Statistics	31.91	syp-3het	SYP5GFP	1888120	59170.2
0.372223	0.271758	EP	Herm	DLW249	2023_04_06_DLW249_syp5gfp_herm_01_Statistics	34.13	syp-3het	SYP5GFP	1965640	57592.7
0.36315	0.261234	EP	Herm	DLW249	2023_04_06_DLW249_syp5gfp_herm_01_Statistics	31.16	syp-3het	SYP5GFP	1856650	59584.4
0.350747	0.246846	EP	Herm	DLW249	2023_04_06_DLW249_syp5gfp_herm_01_Statistics	35.12	syp-3het	SYP5GFP	1997880	56887.2
0.371302	0.270691	EP	Herm	DLW249	2023_04_06_DLW249_syp5gfp_herm_01_Statistics	36.18	syp-3het	SYP5GFP	2099520	58029.9
0.3535	0.250039	EP	Herm	DLW249	2023_04_06_DLW249_syp5gfp_herm_01_Statistics	33.48	syp-3het	SYP5GFP	1968410	58793.6
0.332661	0.225865	EP	Herm	DLW249	2023_04_06_DLW249_syp5gfp_herm_01_Statistics	32.13	syp-3het	SYP5GFP	1845270	57431.4
0.335308	0.228937	EP	Herm	DLW249	2023_04_06_DLW249_syp5gfp_herm_01_Statistics	26.81	syp-3het	SYP5GFP	1684490	62830.7
0.304988	0.193764	EP	Herm	DLW249	2023_04_06_DLW249_syp5gfp_herm_01_Statistics	26.23	syp-3het	SYP5GFP	1378190	52542.5
0.31636	0.206956	EP	Herm	DLW249	2023_04_06_DLW249_syp5gfp_herm_01_Statistics	28.8	syp-3het	SYP5GFP	1491840	51800
0.296269	0.18365	EP	Herm	DLW249	2023_04_06_DLW249_syp5gfp_herm_01_Statistics	29.1	syp-3het	SYP5GFP	1514150	52032.6
0.412775	0.3188	EP	Herm	DLW249	2023_04_06_DLW249_syp5gfp_herm_01_Statistics	41.66	syp-3het	SYP5GFP	2559090	61428
0.34339	0.238311	EP	Herm	DLW249	2023_04_06_DLW249_syp5gfp_herm_01_Statistics	31.71	syp-3het	SYP5GFP	1849900	58338.1
0.324134	0.215974	EP	Herm	DLW249	2023_04_06_DLW249_syp5gfp_herm_01_Statistics	28.59	syp-3het	SYP5GFP	1596310	55834.6
0.315234	0.205649	EP	Herm	DLW249	2023_04_06_DLW249_syp5gfp_herm_01_Statistics	30	syp-3het	SYP5GFP	1680210	56007
0.294187	0.181234	EP	Herm	DLW249	2023_04_06_DLW249_syp5gfp_herm_01_Statistics	27.37	syp-3het	SYP5GFP	1393200	50902.4
0.417216	0.323952	EP	Herm	DLW249	2023_04_06_DLW249_syp5gfp_herm_01_Statistics	41.14	syp-3het	SYP5GFP	2608830	63413.5
0.598804	0.534599	MP	Herm	DLW249	2023_04_06_DLW249_syp5gfp_herm_01_Statistics	58.36	syp-3het	SYP5GFP	4938760	84625.8
0.61292	0.550975	MP	Herm	DLW249	2023_04_06_DLW249_syp5gfp_herm_01_Statistics	64.32	syp-3het	SYP5GFP	5703570	88674.9
0.584232	0.517695	MP	Herm	DLW249	2023_04_06_DLW249_syp5gfp_herm_01_Statistics	55.28	syp-3het	SYP5GFP	4580790	82865.2
0.577197	0.509535	MP	Herm	DLW249	2023_04_06_DLW249_syp5gfp_herm_01_Statistics	45.11	syp-3het	SYP5GFP	3529290	78237.4
0.591079	0.525639	MP	Herm	DLW249	2023_04_06_DLW249_syp5gfp_herm_01_Statistics	61.1	syp-3het	SYP5GFP	4931840	80717.5
0.606124	0.543091	MP	Herm	DLW249	2023_04_06_DLW249_syp5gfp_herm_01_Statistics	62.65	syp-3het	SYP5GFP	5556090	88684.6
0.562164	0.492096	MP	Herm	DLW249	2023_04_06_DLW249_syp5gfp_herm_01_Statistics	51.42	syp-3het	SYP5GFP	4064650	79048
0.582497	0.515683	MP	Herm	DLW249	2023_04_06_DLW249_syp5gfp_herm_01_Statistics	52.19	syp-3het	SYP5GFP	4216470	80790.8
0.553792	0.482385	MP	Herm	DLW249	2023_04_06_DLW249_syp5gfp_herm_01_Statistics	49.22	syp-3het	SYP5GFP	3703500	75243.8
0.566358	0.496961	MP	Herm	DLW249	2023_04_06_DLW249_syp5gfp_herm_01_Statistics	55.57	syp-3het	SYP5GFP	4215830	75865.2
0.562037	0.491949	MP	Herm	DLW249	2023_04_06_DLW249_syp5gfp_herm_01_Statistics	64.55	syp-3het	SYP5GFP	4869060	75430.8
0.544897	0.472066	MP	Herm	DLW249	2023_04_06_DLW249_syp5gfp_herm_01_Statistics	56.12	syp-3het	SYP5GFP	4247370	75683.7
0.531642	0.456689	MP	Herm	DLW249	2023_04_06_DLW249_syp5gfp_herm_01_Statistics	55.71	syp-3het	SYP5GFP	4129360	74122.4
0.539933	0.466308	MP	Herm	DLW249	2023_04_06_DLW249_syp5gfp_herm_01_Statistics	66.36	syp-3het	SYP5GFP	5201510	78383.2
0.516489	0.439112	MP	Herm	DLW249	2023_04_06_DLW249_syp5gfp_herm_01_Statistics	13.36	syp-3het	SYP5GFP	1024490	76683.4
0.523344	0.447064	MP	Herm	DLW249	2023_04_06_DLW249_syp5gfp_herm_01_Statistics	48.6	syp-3het	SYP5GFP	3469770	71394.4
0.499003	0.418827	MP	Herm	DLW249	2023_04_06_DLW249_syp5gfp_herm_01_Statistics	49.31	syp-3het	SYP5GFP	3470860	70388.6
0.514673	0.437005	MP	Herm	DLW249	2023_04_06_DLW249_syp5gfp_herm_01_Statistics	62.06	syp-3het	SYP5GFP	4491340	72370.9
0.507746	0.42897	MP	Herm	DLW249	2023_04_06_DLW249_syp5gfp_herm_01_Statistics	34.85	syp-3het	SYP5GFP	2429730	69719.7
0.49038	0.408824	MP	Herm	DLW249	2023_04_06_DLW249_syp5gfp_herm_01_Statistics	43.6	syp-3het	SYP5GFP	3119450	71547
0.500942	0.421077	MP	Herm	DLW249	2023_04_06_DLW249_syp5gfp_herm_01_Statistics	52.38	syp-3het	SYP5GFP	3726670	71146.8
0.448528	0.360275	MP	Herm	DLW249	2023_04_06_DLW249_syp5gfp_herm_01_Statistics	23.17	syp-3het	SYP5GFP	1424870	61496.3
0.481055	0.398008	MP	Herm	DLW249	2023_04_06_DLW249_syp5gfp_herm_01_Statistics	35.12	syp-3het	SYP5GFP	2312460	65844.5
0.469524	0.384631	MP	Herm	DLW249	2023_04_06_DLW249_syp5gfp_herm_01_Statistics	35.06	syp-3het	SYP5GFP	2289460	65301.2
0.472806	0.388438	MP	Herm	DLW249	2023_04_06_DLW249_syp5gfp_herm_01_Statistics	48.46	syp-3het	SYP5GFP	3435400	70891.5
0.459915	0.373484	MP	Herm	DLW249	2023_04_06_DLW249_syp5gfp_herm_01_Statistics	41.93	syp-3het	SYP5GFP	2892200	68976.9
0.449985	0.361965	MP	Herm	DLW249	2023_04_06_DLW249_syp5gfp_herm_01_Statistics	42.09	syp-3het	SYP5GFP	2580580	61311
0.437343	0.3473	MP	Herm	DLW249	2023_04_06_DLW249_syp5gfp_herm_01_Statistics	31.7	syp-3het	SYP5GFP	1866310	58874.1
0.428712	0.337288	MP	Herm	DLW249	2023_04_06_DLW249_syp5gfp_herm_01_Statistics	47.72	syp-3het	SYP5GFP	3033050	63559.3
0.452082	0.364398	MP	Herm	DLW249	2023_04_06_DLW249_syp5gfp_herm_01_Statistics	40.41	syp-3het	SYP5GFP	2648180	65532.8
0.42856	0.337111	MP	Herm	DLW249	2023_04_06_DLW249_syp5gfp_herm_01_Statistics	40.07	syp-3het	SYP5GFP	2757590	68819.3
0.437889	0.347934	MP	Herm	DLW249	2023_04_06_DLW249_syp5gfp_herm_01_Statistics	30.19	syp-3het	SYP5GFP	1987140	65821.1
0.479069	0.395704	MP	Herm	DLW249	2023_04_06_DLW249_syp5gfp_herm_01_Statistics	42.24	syp-3het	SYP5GFP	2734350	64733.7
0.460276	0.373903	MP	Herm	DLW249	2023_04_06_DLW249_syp5gfp_herm_01_Statistics	48.3	syp-3het	SYP5GFP	3122360	64645.1
0.429404	0.338091	MP	Herm	DLW249	2023_04_06_DLW249_syp5gfp_herm_01_Statistics	43.38	syp-3het	SYP5GFP	2687490	61952.3
0.745627	0.704919	LP	Herm	DLW249	2023_04_06_DLW249_syp5gfp_herm_01_Statistics	69.24	syp-3het	SYP5GFP	8029530	115967
0.760049	0.721649	LP	Herm	DLW249	2023_04_06_DLW249_syp5gfp_herm_01_Statistics	77.39	syp-3het	SYP5GFP	8743430	112979
0.720747	0.676058	LP	Herm	DLW249	2023_04_06_DLW249_syp5gfp_herm_01_Statistics	61.82	syp-3het	SYP5GFP	6504140	105211
0.734219	0.691685	LP	Herm	DLW249	2023_04_06_DLW249_syp5gfp_herm_01_Statistics	68.75	syp-3het	SYP5GFP	8020570	116663
0.750051	0.710051	LP	Herm	DLW249	2023_04_06_DLW249_syp5gfp_herm_01_Statistics	66.04	syp-3het	SYP5GFP	7082760	107250
0.741899	0.700595	LP	Herm	DLW249	2023_04_06_DLW249_syp5gfp_herm_01_Statistics	66.39	syp-3het	SYP5GFP	7741310	116604
0.724261	0.680134	LP	Herm	DLW249	2023_04_06_DLW249_syp5gfp_herm_01_Statistics	70.37	syp-3het	SYP5GFP	7911090	112421
0.694049	0.645087	MP	Herm	DLW249	2023_04_06_DLW249_syp5gfp_herm_01_Statistics	67.99	syp-3het	SYP5GFP	7151290	105181
0.70854	0.661898	MP	Herm	DLW249	2023_04_06_DLW249_syp5gfp_herm_01_Statistics	70.33	syp-3het	SYP5GFP	7558320	107469
0.716551	0.671191	LP	Herm	DLW249	2023_04_06_DLW249_syp5gfp_herm_01_Statistics	77.8	syp-3het	SYP5GFP	9550230	122754
0.671708	0.619171	MP	Herm	DLW249	2023_04_06_DLW249_syp5gfp_herm_01_Statistics	65.71	syp-3het	SYP5GFP	6533340	99426.9
0.69988	0.651851	MP	Herm	DLW249	2023_04_06_DLW249_syp5gfp_herm_01_Statistics	74.91	syp-3het	SYP5GFP	7491560	100007
0.690604	0.641091	MP	Herm	DLW249	2023_04_06_DLW249_syp5gfp_herm_01_Statistics	78.74	syp-3het	SYP5GFP	7948150	100942
0.684019	0.633452	MP	Herm	DLW249	2023_04_06_DLW249_syp5gfp_herm_01_Statistics	70.57	syp-3het	SYP5GFP	7572150	107300
0.648668	0.592443	MP	Herm	DLW249	2023_04_06_DLW249_syp5gfp_herm_01_Statistics	44.16	syp-3het	SYP5GFP	3815280	86396.7
0.67427	0.622142	MP	Herm	DLW249	2023_04_06_DLW249_syp5gfp_herm_01_Statistics	70.21	syp-3het	SYP5GFP	6815230	97069.2
0.660101	0.605706	MP	Herm	DLW249	2023_04_06_DLW249_syp5gfp_herm_01_Statistics	72.1	syp-3het	SYP5GFP	6878880	95407.5
0.665277	0.611711	MP	Herm	DLW249	2023_04_06_DLW249_syp5gfp_herm_01_Statistics	65	syp-3het	SYP5GFP	6299640	96917.5
0.623475	0.563219	MP	Herm	DLW249	2023_04_06_DLW249_syp5gfp_herm_01_Statistics	58.69	syp-3het	SYP5GFP	5349660	91151.1
0.637299	0.579255	MP	Herm	DLW249	2023_04_06_DLW249_syp5gfp_herm_01_Statistics	63.09	syp-3het	SYP5GFP	5661590	89738.3
0.650922	0.595058	MP	Herm	DLW249	2023_04_06_DLW249_syp5gfp_herm_01_Statistics	65.95	syp-3het	SYP5GFP	6322400	95866.6
0.628958	0.569579	MP	Herm	DLW249	2023_04_06_DLW249_syp5gfp_herm_01_Statistics	57.65	syp-3het	SYP5GFP	5123360	88870.1
0.639889	0.58226	MP	Herm	DLW249	2023_04_06_DLW249_syp5gfp_herm_01_Statistics	71.36	syp-3het	SYP5GFP	6740110	94452.2
0.617091	0.555814	MP	Herm	DLW249	2023_04_06_DLW249_syp5gfp_herm_01_Statistics	59.63	syp-3het	SYP5GFP	5380910	90238.3
0.775572	0.739656	LP	Herm	DLW249	2023_04_06_DLW249_syp5gfp_herm_01_Statistics	77.97	syp-3het	SYP5GFP	8970780	115054
0.842065	0.81679	LP	Herm	DLW249	2023_04_06_DLW249_syp5gfp_herm_01_Statistics	79.92	syp-3het	SYP5GFP	9483110	118658
0.858916	0.836338	LP	Herm	DLW249	2023_04_06_DLW249_syp5gfp_herm_01_Statistics	77.62	syp-3het	SYP5GFP	9223010	118823
0.875266	0.855305	LP	Herm	DLW249	2023_04_06_DLW249_syp5gfp_herm_01_Statistics	78.99	syp-3het	SYP5GFP	9347210	118334
0.892409	0.875192	LP	Herm	DLW249	2023_04_06_DLW249_syp5gfp_herm_01_Statistics	79.52	syp-3het	SYP5GFP	10150800	127651
0.880922	0.861865	LP	Herm	DLW249	2023_04_06_DLW249_syp5gfp_herm_01_Statistics	75.42	syp-3het	SYP5GFP	9737070	129105
0.896288	0.87969	LP	Herm	DLW249	2023_04_06_DLW249_syp5gfp_herm_01_Statistics	74.63	syp-3het	SYP5GFP	9500960	127308
0.942596	0.933409	LP	Herm	DLW249	2023_04_06_DLW249_syp5gfp_herm_01_Statistics	78.49	syp-3het	SYP5GFP	10662100	135840
0.940451	0.930922	LP	Herm	DLW249	2023_04_06_DLW249_syp5gfp_herm_01_Statistics	72.05	syp-3het	SYP5GFP	9622720	133556
0.953202	0.945713	LP	Herm	DLW249	2023_04_06_DLW249_syp5gfp_herm_01_Statistics	77.9	syp-3het	SYP5GFP	10173100	130592
0.967077	0.961808	LP	Herm	DLW249	2023_04_06_DLW249_syp5gfp_herm_01_Statistics	61.3	syp-3het	SYP5GFP	8841290	144230
0.968207	0.963119	LP	Herm	DLW249	2023_04_06_DLW249_syp5gfp_herm_01_Statistics	66.89	syp-3het	SYP5GFP	8799280	131549
0.98101	0.977971	LP	Herm	DLW249	2023_04_06_DLW249_syp5gfp_herm_01_Statistics	74.19	syp-3het	SYP5GFP	9009790	121442
0.996406	0.995831	LP	Herm	DLW249	2023_04_06_DLW249_syp5gfp_herm_01_Statistics	71.43	syp-3het	SYP5GFP	9164600	128302
0.847706	0.823335	LP	Herm	DLW249	2023_04_06_DLW249_syp5gfp_herm_01_Statistics	82.12	syp-3het	SYP5GFP	9377070	114187
0.819236	0.790308	LP	Herm	DLW249	2023_04_06_DLW249_syp5gfp_herm_01_Statistics	78.51	syp-3het	SYP5GFP	9062410	115430
0.831933	0.805037	LP	Herm	DLW249	2023_04_06_DLW249_syp5gfp_herm_01_Statistics	75.34	syp-3het	SYP5GFP	9295170	123376
0.821837	0.793325	LP	Herm	DLW249	2023_04_06_DLW249_syp5gfp_herm_01_Statistics	85.29	syp-3het	SYP5GFP	10408200	122033
0.808151	0.777449	LP	Herm	DLW249	2023_04_06_DLW249_syp5gfp_herm_01_Statistics	78.49	syp-3het	SYP5GFP	9433510	120187
0.79415	0.761207	LP	Herm	DLW249	2023_04_06_DLW249_syp5gfp_herm_01_Statistics	74.01	syp-3het	SYP5GFP	8977380	121300
0.786237	0.752029	LP	Herm	DLW249	2023_04_06_DLW249_syp5gfp_herm_01_Statistics	139.02	syp-3het	SYP5GFP	16071300	115604
0.783732	0.749123	LP	Herm	DLW249	2023_04_06_DLW249_syp5gfp_herm_01_Statistics	75.84	syp-3het	SYP5GFP	8636300	113875
0.266523	0.175513	EP	Herm	DLW249	2023_04_06_DLW249_syp5gfp_herm_01001_Statistics	25.73	syp-3het	SYP5GFP	1674830	65092.5
0.286175	0.197603	EP	Herm	DLW249	2023_04_06_DLW249_syp5gfp_herm_01001_Statistics	28.59	syp-3het	SYP5GFP	1896250	66325.6
0.269324	0.178662	EP	Herm	DLW249	2023_04_06_DLW249_syp5gfp_herm_01001_Statistics	25.44	syp-3het	SYP5GFP	1687830	66345.5
0.250587	0.1576	EP	Herm	DLW249	2023_04_06_DLW249_syp5gfp_herm_01001_Statistics	20.59	syp-3het	SYP5GFP	1340680	65113.2
0.263153	0.171725	EP	Herm	DLW249	2023_04_06_DLW249_syp5gfp_herm_01001_Statistics	30.16	syp-3het	SYP5GFP	1942730	64414.1
0.242089	0.148047	EP	Herm	DLW249	2023_04_06_DLW249_syp5gfp_herm_01001_Statistics	11.93	syp-3het	SYP5GFP	741693	62170.4
0.233956	0.138906	EP	Herm	DLW249	2023_04_06_DLW249_syp5gfp_herm_01001_Statistics	11.67	syp-3het	SYP5GFP	722414	61903.5
0.219633	0.122806	EP	Herm	DLW249	2023_04_06_DLW249_syp5gfp_herm_01001_Statistics	15	syp-3het	SYP5GFP	928219	61881.3
0.201693	0.102639	EP	Herm	DLW249	2023_04_06_DLW249_syp5gfp_herm_01001_Statistics	23.94	syp-3het	SYP5GFP	1512970	63198.4
0.189712	0.0891721	EP	Herm	DLW249	2023_04_06_DLW249_syp5gfp_herm_01001_Statistics	16.39	syp-3het	SYP5GFP	1005920	61374
0.179586	0.0777891	EP	Herm	DLW249	2023_04_06_DLW249_syp5gfp_herm_01001_Statistics	15.66	syp-3het	SYP5GFP	961778	61416.2
0.158589	0.0541874	EP	Herm	DLW249	2023_04_06_DLW249_syp5gfp_herm_01001_Statistics	13.85	syp-3het	SYP5GFP	818855	59123.1
0.168885	0.0657608	EP	Herm	DLW249	2023_04_06_DLW249_syp5gfp_herm_01001_Statistics	10.99	syp-3het	SYP5GFP	655690	59662.4
0.152822	0.0477045	EP	Herm	DLW249	2023_04_06_DLW249_syp5gfp_herm_01001_Statistics	13.63	syp-3het	SYP5GFP	824303	60477.1
0.476252	0.411266	MP	Herm	DLW249	2023_04_06_DLW249_syp5gfp_herm_01001_Statistics	33.44	syp-3het	SYP5GFP	2666150	79729.4
0.472604	0.407165	MP	Herm	DLW249	2023_04_06_DLW249_syp5gfp_herm_01001_Statistics	43.05	syp-3het	SYP5GFP	3328310	77312.7
0.460591	0.393661	MP	Herm	DLW249	2023_04_06_DLW249_syp5gfp_herm_01001_Statistics	36.22	syp-3het	SYP5GFP	2636540	72792.4
0.4515	0.383442	MP	Herm	DLW249	2023_04_06_DLW249_syp5gfp_herm_01001_Statistics	32.78	syp-3het	SYP5GFP	2412530	73597.6
0.467351	0.40126	MP	Herm	DLW249	2023_04_06_DLW249_syp5gfp_herm_01001_Statistics	31.99	syp-3het	SYP5GFP	2458310	76846.2
0.43279	0.36241	MP	Herm	DLW249	2023_04_06_DLW249_syp5gfp_herm_01001_Statistics	33.92	syp-3het	SYP5GFP	2493240	73503.5
0.44468	0.375776	MP	Herm	DLW249	2023_04_06_DLW249_syp5gfp_herm_01001_Statistics	34.56	syp-3het	SYP5GFP	2624710	75946.5
0.41935	0.347303	MP	Herm	DLW249	2023_04_06_DLW249_syp5gfp_herm_01001_Statistics	21.59	syp-3het	SYP5GFP	1642390	76071.8
0.414263	0.341585	MP	Herm	DLW249	2023_04_06_DLW249_syp5gfp_herm_01001_Statistics	25.27	syp-3het	SYP5GFP	1988420	78687
0.404738	0.330878	EP	Herm	DLW249	2023_04_06_DLW249_syp5gfp_herm_01001_Statistics	31.01	syp-3het	SYP5GFP	2406320	77598.2
0.39527	0.320235	EP	Herm	DLW249	2023_04_06_DLW249_syp5gfp_herm_01001_Statistics	29.44	syp-3het	SYP5GFP	2134630	72507.8
0.390334	0.314687	EP	Herm	DLW249	2023_04_06_DLW249_syp5gfp_herm_01001_Statistics	33.69	syp-3het	SYP5GFP	2345400	69617.1
0.388496	0.31262	EP	Herm	DLW249	2023_04_06_DLW249_syp5gfp_herm_01001_Statistics	22.05	syp-3het	SYP5GFP	1579660	71639.9
0.37843	0.301306	EP	Herm	DLW249	2023_04_06_DLW249_syp5gfp_herm_01001_Statistics	17.59	syp-3het	SYP5GFP	1255550	71378.6
0.36785	0.289413	EP	Herm	DLW249	2023_04_06_DLW249_syp5gfp_herm_01001_Statistics	35.71	syp-3het	SYP5GFP	2521750	70617.5
0.352713	0.272398	EP	Herm	DLW249	2023_04_06_DLW249_syp5gfp_herm_01001_Statistics	30.82	syp-3het	SYP5GFP	2153670	69879
0.337315	0.255089	EP	Herm	DLW249	2023_04_06_DLW249_syp5gfp_herm_01001_Statistics	26.36	syp-3het	SYP5GFP	1973050	74850.2
0.327879	0.244483	EP	Herm	DLW249	2023_04_06_DLW249_syp5gfp_herm_01001_Statistics	28.92	syp-3het	SYP5GFP	1930300	66746.2
0.32494	0.241179	EP	Herm	DLW249	2023_04_06_DLW249_syp5gfp_herm_01001_Statistics	30.63	syp-3het	SYP5GFP	2172620	70931.1
0.321552	0.23737	EP	Herm	DLW249	2023_04_06_DLW249_syp5gfp_herm_01001_Statistics	31.05	syp-3het	SYP5GFP	2037110	65607.4
0.32595	0.242314	EP	Herm	DLW249	2023_04_06_DLW249_syp5gfp_herm_01001_Statistics	32.1	syp-3het	SYP5GFP	2244260	69914.6
0.30069	0.21392	EP	Herm	DLW249	2023_04_06_DLW249_syp5gfp_herm_01001_Statistics	23.32	syp-3het	SYP5GFP	1618280	69394.5
0.300665	0.213892	EP	Herm	DLW249	2023_04_06_DLW249_syp5gfp_herm_01001_Statistics	27.46	syp-3het	SYP5GFP	1832490	66733.1
0.681777	0.642291	MP	Herm	DLW249	2023_04_06_DLW249_syp5gfp_herm_01001_Statistics	60.43	syp-3het	SYP5GFP	6280220	103926
0.666397	0.625004	MP	Herm	DLW249	2023_04_06_DLW249_syp5gfp_herm_01001_Statistics	34.76	syp-3het	SYP5GFP	3323440	95611
0.650526	0.607163	MP	Herm	DLW249	2023_04_06_DLW249_syp5gfp_herm_01001_Statistics	24.81	syp-3het	SYP5GFP	2460980	99193.1
0.62255	0.575716	MP	Herm	DLW249	2023_04_06_DLW249_syp5gfp_herm_01001_Statistics	39.8	syp-3het	SYP5GFP	3659950	91958.5
0.63823	0.593342	MP	Herm	DLW249	2023_04_06_DLW249_syp5gfp_herm_01001_Statistics	54.71	syp-3het	SYP5GFP	5490240	100352
0.62941	0.583428	MP	Herm	DLW249	2023_04_06_DLW249_syp5gfp_herm_01001_Statistics	59.7	syp-3het	SYP5GFP	5968890	99981.4
0.596288	0.546195	MP	Herm	DLW249	2023_04_06_DLW249_syp5gfp_herm_01001_Statistics	41.54	syp-3het	SYP5GFP	3634370	87490.9
0.601685	0.552263	MP	Herm	DLW249	2023_04_06_DLW249_syp5gfp_herm_01001_Statistics	53.96	syp-3het	SYP5GFP	4991580	92505.2
0.571333	0.518144	MP	Herm	DLW249	2023_04_06_DLW249_syp5gfp_herm_01001_Statistics	25.79	syp-3het	SYP5GFP	2274040	88175.3
0.558778	0.504031	MP	Herm	DLW249	2023_04_06_DLW249_syp5gfp_herm_01001_Statistics	53.78	syp-3het	SYP5GFP	4815620	89543
0.531626	0.47351	MP	Herm	DLW249	2023_04_06_DLW249_syp5gfp_herm_01001_Statistics	49.53	syp-3het	SYP5GFP	4228190	85366.2
0.543976	0.487393	MP	Herm	DLW249	2023_04_06_DLW249_syp5gfp_herm_01001_Statistics	40.51	syp-3het	SYP5GFP	3371330	83222.2
0.546562	0.4903	MP	Herm	DLW249	2023_04_06_DLW249_syp5gfp_herm_01001_Statistics	47.21	syp-3het	SYP5GFP	4005350	84841.1
0.516876	0.45693	MP	Herm	DLW249	2023_04_06_DLW249_syp5gfp_herm_01001_Statistics	36.84	syp-3het	SYP5GFP	3172530	86116.4
0.529065	0.470631	MP	Herm	DLW249	2023_04_06_DLW249_syp5gfp_herm_01001_Statistics	49.72	syp-3het	SYP5GFP	4196540	84403.5
0.519255	0.459604	MP	Herm	DLW249	2023_04_06_DLW249_syp5gfp_herm_01001_Statistics	42.53	syp-3het	SYP5GFP	3508130	82486
0.500102	0.438075	MP	Herm	DLW249	2023_04_06_DLW249_syp5gfp_herm_01001_Statistics	52.05	syp-3het	SYP5GFP	4299130	82596.2
0.485128	0.421242	MP	Herm	DLW249	2023_04_06_DLW249_syp5gfp_herm_01001_Statistics	38.48	syp-3het	SYP5GFP	3417350	88808.5
0.49352	0.430677	MP	Herm	DLW249	2023_04_06_DLW249_syp5gfp_herm_01001_Statistics	15.72	syp-3het	SYP5GFP	1228460	78146.3
0.980612	0.978206	LP	Herm	DLW249	2023_04_06_DLW249_syp5gfp_herm_01001_Statistics	61.24	syp-3het	SYP5GFP	7662980	125130
0.981058	0.978708	LP	Herm	DLW249	2023_04_06_DLW249_syp5gfp_herm_01001_Statistics	60.47	syp-3het	SYP5GFP	8009200	132449
0.957392	0.952106	LP	Herm	DLW249	2023_04_06_DLW249_syp5gfp_herm_01001_Statistics	66.85	syp-3het	SYP5GFP	8295850	124096
0.929557	0.920817	LP	Herm	DLW249	2023_04_06_DLW249_syp5gfp_herm_01001_Statistics	60.75	syp-3het	SYP5GFP	7859370	129372
0.918278	0.908138	LP	Herm	DLW249	2023_04_06_DLW249_syp5gfp_herm_01001_Statistics	67.4	syp-3het	SYP5GFP	9036690	134076
0.90893	0.89763	LP	Herm	DLW249	2023_04_06_DLW249_syp5gfp_herm_01001_Statistics	66.78	syp-3het	SYP5GFP	8589670	128626
0.924056	0.914633	LP	Herm	DLW249	2023_04_06_DLW249_syp5gfp_herm_01001_Statistics	68	syp-3het	SYP5GFP	8308790	122188
0.881631	0.866944	LP	Herm	DLW249	2023_04_06_DLW249_syp5gfp_herm_01001_Statistics	50.85	syp-3het	SYP5GFP	7414580	145813
0.879498	0.864546	LP	Herm	DLW249	2023_04_06_DLW249_syp5gfp_herm_01001_Statistics	64.95	syp-3het	SYP5GFP	8022450	123517
0.902472	0.89037	LP	Herm	DLW249	2023_04_06_DLW249_syp5gfp_herm_01001_Statistics	66.72	syp-3het	SYP5GFP	8407530	126012
0.865747	0.849089	LP	Herm	DLW249	2023_04_06_DLW249_syp5gfp_herm_01001_Statistics	73.91	syp-3het	SYP5GFP	8732690	118153
0.855501	0.837572	LP	Herm	DLW249	2023_04_06_DLW249_syp5gfp_herm_01001_Statistics	64.9	syp-3het	SYP5GFP	8187870	126161
0.845549	0.826385	LP	Herm	DLW249	2023_04_06_DLW249_syp5gfp_herm_01001_Statistics	63.29	syp-3het	SYP5GFP	7688720	121484
0.810797	0.787321	LP	Herm	DLW249	2023_04_06_DLW249_syp5gfp_herm_01001_Statistics	69.65	syp-3het	SYP5GFP	8097000	116253
0.825098	0.803396	LP	Herm	DLW249	2023_04_06_DLW249_syp5gfp_herm_01001_Statistics	61.92	syp-3het	SYP5GFP	7782310	125683
0.833718	0.813085	LP	Herm	DLW249	2023_04_06_DLW249_syp5gfp_herm_01001_Statistics	68.58	syp-3het	SYP5GFP	8259990	120443
0.805711	0.781604	LP	Herm	DLW249	2023_04_06_DLW249_syp5gfp_herm_01001_Statistics	73.88	syp-3het	SYP5GFP	8928930	120857
0.789675	0.763578	LP	Herm	DLW249	2023_04_06_DLW249_syp5gfp_herm_01001_Statistics	62.82	syp-3het	SYP5GFP	7937970	126361
0.778255	0.750741	LP	Herm	DLW249	2023_04_06_DLW249_syp5gfp_herm_01001_Statistics	60.21	syp-3het	SYP5GFP	7258120	120547
0.757727	0.727666	LP	Herm	DLW249	2023_04_06_DLW249_syp5gfp_herm_01001_Statistics	65	syp-3het	SYP5GFP	7659230	117834
0.748039	0.716775	LP	Herm	DLW249	2023_04_06_DLW249_syp5gfp_herm_01001_Statistics	69.3	syp-3het	SYP5GFP	8234530	118824
0.77315	0.745002	LP	Herm	DLW249	2023_04_06_DLW249_syp5gfp_herm_01001_Statistics	64.02	syp-3het	SYP5GFP	7684320	120030
0.727113	0.693253	LP	Herm	DLW249	2023_04_06_DLW249_syp5gfp_herm_01001_Statistics	65.64	syp-3het	SYP5GFP	7674990	116926
0.739894	0.70762	LP	Herm	DLW249	2023_04_06_DLW249_syp5gfp_herm_01001_Statistics	65.74	syp-3het	SYP5GFP	7442400	113210
0.708507	0.672338	LP	Herm	DLW249	2023_04_06_DLW249_syp5gfp_herm_01001_Statistics	66.36	syp-3het	SYP5GFP	7237210	109060
0.698497	0.661087	MP	Herm	DLW249	2023_04_06_DLW249_syp5gfp_herm_01001_Statistics	65.93	syp-3het	SYP5GFP	7597580	115237
0.943309	0.936275	LP	Herm	DLW249	2023_04_06_DLW249_syp5gfp_herm_01001_Statistics	54.29	syp-3het	SYP5GFP	7029970	129489
0.962169	0.957475	LP	Herm	DLW249	2023_04_06_DLW249_syp5gfp_herm_01001_Statistics	62.25	syp-3het	SYP5GFP	8660010	139117
0.269178	0.0302965	EP	Herm	DLW249	2023_04_06_DLW249_syp5gfp_herm_01002_Statistics	14.26	syp-3het	SYP5GFP	908540	63712.5
0.247374	0.00136507	EP	Herm	DLW249	2023_04_06_DLW249_syp5gfp_herm_01002_Statistics	11	syp-3het	SYP5GFP	699346	63576.9
0.280868	0.0458077	EP	Herm	DLW249	2023_04_06_DLW249_syp5gfp_herm_01002_Statistics	11.89	syp-3het	SYP5GFP	779145	65529.4
0.298298	0.0689346	EP	Herm	DLW249	2023_04_06_DLW249_syp5gfp_herm_01002_Statistics	23.21	syp-3het	SYP5GFP	1590280	68517
0.325512	0.105044	EP	Herm	DLW249	2023_04_06_DLW249_syp5gfp_herm_01002_Statistics	26.14	syp-3het	SYP5GFP	1843760	70534
0.352695	0.141113	EP	Herm	DLW249	2023_04_06_DLW249_syp5gfp_herm_01002_Statistics	19.35	syp-3het	SYP5GFP	1386120	71634.1
0.397388	0.200415	EP	Herm	DLW249	2023_04_06_DLW249_syp5gfp_herm_01002_Statistics	28.86	syp-3het	SYP5GFP	2186500	75762.3
0.379931	0.177251	EP	Herm	DLW249	2023_04_06_DLW249_syp5gfp_herm_01002_Statistics	30.79	syp-3het	SYP5GFP	2262030	73466.4
0.403662	0.208739	EP	Herm	DLW249	2023_04_06_DLW249_syp5gfp_herm_01002_Statistics	23.44	syp-3het	SYP5GFP	1671090	71292.2
0.392527	0.193964	EP	Herm	DLW249	2023_04_06_DLW249_syp5gfp_herm_01002_Statistics	21.09	syp-3het	SYP5GFP	1467730	69593.6
0.387144	0.186821	EP	Herm	DLW249	2023_04_06_DLW249_syp5gfp_herm_01002_Statistics	25.29	syp-3het	SYP5GFP	1767190	69877
0.410988	0.218459	EP	Herm	DLW249	2023_04_06_DLW249_syp5gfp_herm_01002_Statistics	33.21	syp-3het	SYP5GFP	2349750	70754.3
0.428642	0.241884	EP	Herm	DLW249	2023_04_06_DLW249_syp5gfp_herm_01002_Statistics	30.49	syp-3het	SYP5GFP	2166270	71048.5
0.418167	0.227985	EP	Herm	DLW249	2023_04_06_DLW249_syp5gfp_herm_01002_Statistics	24.4	syp-3het	SYP5GFP	1735060	71109
0.425451	0.23765	EP	Herm	DLW249	2023_04_06_DLW249_syp5gfp_herm_01002_Statistics	20.02	syp-3het	SYP5GFP	1383370	69099.4
0.426686	0.239288	EP	Herm	DLW249	2023_04_06_DLW249_syp5gfp_herm_01002_Statistics	25.47	syp-3het	SYP5GFP	1763280	69229.7
0.488098	0.320775	EP	Herm	DLW249	2023_04_06_DLW249_syp5gfp_herm_01002_Statistics	50.01	syp-3het	SYP5GFP	4096330	81910.2
0.45324	0.274522	EP	Herm	DLW249	2023_04_06_DLW249_syp5gfp_herm_01002_Statistics	21.99	syp-3het	SYP5GFP	1547430	70369.7
0.519251	0.36211	MP	Herm	DLW249	2023_04_06_DLW249_syp5gfp_herm_01002_Statistics	27.88	syp-3het	SYP5GFP	2398850	86042
0.51362	0.354639	MP	Herm	DLW249	2023_04_06_DLW249_syp5gfp_herm_01002_Statistics	41.97	syp-3het	SYP5GFP	3484200	83016.4
0.500612	0.337379	MP	Herm	DLW249	2023_04_06_DLW249_syp5gfp_herm_01002_Statistics	22.97	syp-3het	SYP5GFP	1883560	82000.9
0.519057	0.361852	MP	Herm	DLW249	2023_04_06_DLW249_syp5gfp_herm_01002_Statistics	24.59	syp-3het	SYP5GFP	2133920	86780
0.542656	0.393165	MP	Herm	DLW249	2023_04_06_DLW249_syp5gfp_herm_01002_Statistics	26.51	syp-3het	SYP5GFP	2275670	85841.9
0.540047	0.389704	MP	Herm	DLW249	2023_04_06_DLW249_syp5gfp_herm_01002_Statistics	46.31	syp-3het	SYP5GFP	4037330	87180.5
0.564374	0.421982	MP	Herm	DLW249	2023_04_06_DLW249_syp5gfp_herm_01002_Statistics	27.86	syp-3het	SYP5GFP	2411130	86544.5
0.540052	0.38971	MP	Herm	DLW249	2023_04_06_DLW249_syp5gfp_herm_01002_Statistics	34.39	syp-3het	SYP5GFP	2837520	82510
0.567255	0.425805	MP	Herm	DLW249	2023_04_06_DLW249_syp5gfp_herm_01002_Statistics	52.34	syp-3het	SYP5GFP	4639970	88650.6
0.563251	0.420492	MP	Herm	DLW249	2023_04_06_DLW249_syp5gfp_herm_01002_Statistics	54.55	syp-3het	SYP5GFP	5046200	92506
0.595253	0.462955	MP	Herm	DLW249	2023_04_06_DLW249_syp5gfp_herm_01002_Statistics	59.17	syp-3het	SYP5GFP	5596950	94591
0.585051	0.449418	MP	Herm	DLW249	2023_04_06_DLW249_syp5gfp_herm_01002_Statistics	59.2	syp-3het	SYP5GFP	5599350	94583.6
0.605421	0.476446	MP	Herm	DLW249	2023_04_06_DLW249_syp5gfp_herm_01002_Statistics	55.6	syp-3het	SYP5GFP	5386720	96883.5
0.614338	0.488278	MP	Herm	DLW249	2023_04_06_DLW249_syp5gfp_herm_01002_Statistics	57.45	syp-3het	SYP5GFP	5787950	100748
0.63036	0.509537	MP	Herm	DLW249	2023_04_06_DLW249_syp5gfp_herm_01002_Statistics	64.45	syp-3het	SYP5GFP	6359710	98676.6
0.632531	0.512417	MP	Herm	DLW249	2023_04_06_DLW249_syp5gfp_herm_01002_Statistics	59.39	syp-3het	SYP5GFP	6118390	103021
0.654212	0.541185	MP	Herm	DLW249	2023_04_06_DLW249_syp5gfp_herm_01002_Statistics	60.67	syp-3het	SYP5GFP	5817920	95894.5
0.659796	0.548595	MP	Herm	DLW249	2023_04_06_DLW249_syp5gfp_herm_01002_Statistics	57.67	syp-3het	SYP5GFP	6122170	106159
0.641368	0.524143	MP	Herm	DLW249	2023_04_06_DLW249_syp5gfp_herm_01002_Statistics	63.39	syp-3het	SYP5GFP	6689970	105537
0.662288	0.551901	MP	Herm	DLW249	2023_04_06_DLW249_syp5gfp_herm_01002_Statistics	59.3	syp-3het	SYP5GFP	6265080	105651
0.687377	0.58519	MP	Herm	DLW249	2023_04_06_DLW249_syp5gfp_herm_01002_Statistics	63.07	syp-3het	SYP5GFP	6711280	106410
0.692228	0.591627	MP	Herm	DLW249	2023_04_06_DLW249_syp5gfp_herm_01002_Statistics	61.77	syp-3het	SYP5GFP	6790920	109939
0.718421	0.626383	MP	Herm	DLW249	2023_04_06_DLW249_syp5gfp_herm_01002_Statistics	69.82	syp-3het	SYP5GFP	7613820	109049
0.716927	0.6244	MP	Herm	DLW249	2023_04_06_DLW249_syp5gfp_herm_01002_Statistics	63.33	syp-3het	SYP5GFP	6965070	109981
0.743573	0.659756	MP	Herm	DLW249	2023_04_06_DLW249_syp5gfp_herm_01002_Statistics	67.43	syp-3het	SYP5GFP	7757660	115048
0.752068	0.671027	LP	Herm	DLW249	2023_04_06_DLW249_syp5gfp_herm_01002_Statistics	63.76	syp-3het	SYP5GFP	7250490	113715
0.7734	0.699332	LP	Herm	DLW249	2023_04_06_DLW249_syp5gfp_herm_01002_Statistics	65.4	syp-3het	SYP5GFP	7590230	116059
0.78619	0.716303	LP	Herm	DLW249	2023_04_06_DLW249_syp5gfp_herm_01002_Statistics	67.47	syp-3het	SYP5GFP	7802700	115647
0.796391	0.729839	LP	Herm	DLW249	2023_04_06_DLW249_syp5gfp_herm_01002_Statistics	68.43	syp-3het	SYP5GFP	7574500	110690
0.757092	0.677694	LP	Herm	DLW249	2023_04_06_DLW249_syp5gfp_herm_01002_Statistics	65.52	syp-3het	SYP5GFP	7372300	112520
0.666338	0.557275	MP	Herm	DLW249	2023_04_06_DLW249_syp5gfp_herm_01002_Statistics	57.07	syp-3het	SYP5GFP	6140180	107590
0.812965	0.751829	LP	Herm	DLW249	2023_04_06_DLW249_syp5gfp_herm_01002_Statistics	63.77	syp-3het	SYP5GFP	7428100	116483
0.846637	0.796508	LP	Herm	DLW249	2023_04_06_DLW249_syp5gfp_herm_01002_Statistics	73.67	syp-3het	SYP5GFP	8098570	109930
0.82017	0.76139	LP	Herm	DLW249	2023_04_06_DLW249_syp5gfp_herm_01002_Statistics	62.82	syp-3het	SYP5GFP	7035170	111989
0.849063	0.799727	LP	Herm	DLW249	2023_04_06_DLW249_syp5gfp_herm_01002_Statistics	65.13	syp-3het	SYP5GFP	7014700	107703
0.878933	0.839361	LP	Herm	DLW249	2023_04_06_DLW249_syp5gfp_herm_01002_Statistics	68.4	syp-3het	SYP5GFP	7667620	112100
0.893555	0.858762	LP	Herm	DLW249	2023_04_06_DLW249_syp5gfp_herm_01002_Statistics	61.79	syp-3het	SYP5GFP	6897890	111634
0.960692	0.947844	LP	Herm	DLW249	2023_04_06_DLW249_syp5gfp_herm_01002_Statistics	67.35	syp-3het	SYP5GFP	7225140	107278
0.927258	0.90348	LP	Herm	DLW249	2023_04_06_DLW249_syp5gfp_herm_01002_Statistics	66.8	syp-3het	SYP5GFP	7565380	113254
0.936154	0.915285	LP	Herm	DLW249	2023_04_06_DLW249_syp5gfp_herm_01002_Statistics	66.19	syp-3het	SYP5GFP	7189630	108621
0.961997	0.949575	LP	Herm	DLW249	2023_04_06_DLW249_syp5gfp_herm_01002_Statistics	64.54	syp-3het	SYP5GFP	7396140	114598
0.983911	0.978652	LP	Herm	DLW249	2023_04_06_DLW249_syp5gfp_herm_01002_Statistics	61.28	syp-3het	SYP5GFP	7388470	120569
0.886042	0.848792	LP	Herm	DLW249	2023_04_06_DLW249_syp5gfp_herm_01002_Statistics	63.88	syp-3het	SYP5GFP	7032040	110082
0.890617	0.854864	LP	Herm	DLW249	2023_04_06_DLW249_syp5gfp_herm_01002_Statistics	59.8	syp-3het	SYP5GFP	6612970	110585
0.233855	0.0957993	EP	Herm	DLW249	2023_04_06_DLW249_syp5gfp_herm_01003_Statistics	13.47	syp-3het	SYP5GFP	925140	68681.5
0.210873	0.0686757	EP	Herm	DLW249	2023_04_06_DLW249_syp5gfp_herm_01003_Statistics	14.19	syp-3het	SYP5GFP	938461	66135.4
0.219845	0.0792642	EP	Herm	DLW249	2023_04_06_DLW249_syp5gfp_herm_01003_Statistics	18.13	syp-3het	SYP5GFP	1232930	68005
0.18489	0.0380103	EP	Herm	DLW249	2023_04_06_DLW249_syp5gfp_herm_01003_Statistics	11.77	syp-3het	SYP5GFP	796020	67631.3
0.229812	0.091027	EP	Herm	DLW249	2023_04_06_DLW249_syp5gfp_herm_01003_Statistics	21.14	syp-3het	SYP5GFP	1508730	71368.5
0.213558	0.0718448	EP	Herm	DLW249	2023_04_06_DLW249_syp5gfp_herm_01003_Statistics	13.48	syp-3het	SYP5GFP	923006	68472.3
0.394424	0.285302	EP	Herm	DLW249	2023_04_06_DLW249_syp5gfp_herm_01003_Statistics	31.48	syp-3het	SYP5GFP	2436260	77390.7
0.408952	0.302447	EP	Herm	DLW249	2023_04_06_DLW249_syp5gfp_herm_01003_Statistics	22.69	syp-3het	SYP5GFP	1895580	83542.5
0.379823	0.268069	EP	Herm	DLW249	2023_04_06_DLW249_syp5gfp_herm_01003_Statistics	22.49	syp-3het	SYP5GFP	1706390	75873.3
0.389038	0.278945	EP	Herm	DLW249	2023_04_06_DLW249_syp5gfp_herm_01003_Statistics	28.03	syp-3het	SYP5GFP	2129600	75975.7
0.352382	0.235684	EP	Herm	DLW249	2023_04_06_DLW249_syp5gfp_herm_01003_Statistics	25.41	syp-3het	SYP5GFP	1882720	74093.7
0.332785	0.212556	EP	Herm	DLW249	2023_04_06_DLW249_syp5gfp_herm_01003_Statistics	24.63	syp-3het	SYP5GFP	1973640	80131.5
0.305519	0.180376	EP	Herm	DLW249	2023_04_06_DLW249_syp5gfp_herm_01003_Statistics	23.89	syp-3het	SYP5GFP	1816330	76028.9
0.327499	0.206317	EP	Herm	DLW249	2023_04_06_DLW249_syp5gfp_herm_01003_Statistics	22.95	syp-3het	SYP5GFP	1732560	75492.8
0.302838	0.177213	EP	Herm	DLW249	2023_04_06_DLW249_syp5gfp_herm_01003_Statistics	19.01	syp-3het	SYP5GFP	1427560	75095.2
0.327247	0.20602	EP	Herm	DLW249	2023_04_06_DLW249_syp5gfp_herm_01003_Statistics	18.77	syp-3het	SYP5GFP	1376030	73310.1
0.270815	0.139419	EP	Herm	DLW249	2023_04_06_DLW249_syp5gfp_herm_01003_Statistics	22.41	syp-3het	SYP5GFP	1602250	71497.1
0.287324	0.158903	EP	Herm	DLW249	2023_04_06_DLW249_syp5gfp_herm_01003_Statistics	19.75	syp-3het	SYP5GFP	1524820	77206.1
0.301983	0.176203	EP	Herm	DLW249	2023_04_06_DLW249_syp5gfp_herm_01003_Statistics	22.16	syp-3het	SYP5GFP	1621220	73159.7
0.272093	0.140927	EP	Herm	DLW249	2023_04_06_DLW249_syp5gfp_herm_01003_Statistics	21.77	syp-3het	SYP5GFP	1516040	69639
0.258389	0.124754	EP	Herm	DLW249	2023_04_06_DLW249_syp5gfp_herm_01003_Statistics	18.17	syp-3het	SYP5GFP	1300250	71560.3
0.254027	0.119605	EP	Herm	DLW249	2023_04_06_DLW249_syp5gfp_herm_01003_Statistics	20.62	syp-3het	SYP5GFP	1468670	71225.5
0.342835	0.224416	EP	Herm	DLW249	2023_04_06_DLW249_syp5gfp_herm_01003_Statistics	17.79	syp-3het	SYP5GFP	1318250	74100.6
0.315531	0.192193	EP	Herm	DLW249	2023_04_06_DLW249_syp5gfp_herm_01003_Statistics	23.25	syp-3het	SYP5GFP	1641130	70586.2
0.25235	0.117627	EP	Herm	DLW249	2023_04_06_DLW249_syp5gfp_herm_01003_Statistics	20.38	syp-3het	SYP5GFP	1412930	69329.2
0.277226	0.146985	EP	Herm	DLW249	2023_04_06_DLW249_syp5gfp_herm_01003_Statistics	20.75	syp-3het	SYP5GFP	1473630	71018.3
0.242823	0.106382	EP	Herm	DLW249	2023_04_06_DLW249_syp5gfp_herm_01003_Statistics	15.1	syp-3het	SYP5GFP	1044050	69142.4
0.638315	0.57314	MP	Herm	DLW249	2023_04_06_DLW249_syp5gfp_herm_01003_Statistics	58.25	syp-3het	SYP5GFP	5826780	100031
0.641741	0.577185	MP	Herm	DLW249	2023_04_06_DLW249_syp5gfp_herm_01003_Statistics	53.45	syp-3het	SYP5GFP	5200680	97299.9
0.599074	0.526829	MP	Herm	DLW249	2023_04_06_DLW249_syp5gfp_herm_01003_Statistics	46.8	syp-3het	SYP5GFP	4454500	95181.6
0.6098	0.539488	MP	Herm	DLW249	2023_04_06_DLW249_syp5gfp_herm_01003_Statistics	55.04	syp-3het	SYP5GFP	5267320	95699.9
0.57189	0.494747	MP	Herm	DLW249	2023_04_06_DLW249_syp5gfp_herm_01003_Statistics	58.51	syp-3het	SYP5GFP	5390080	92122.4
0.581439	0.506017	MP	Herm	DLW249	2023_04_06_DLW249_syp5gfp_herm_01003_Statistics	53.58	syp-3het	SYP5GFP	5074020	94699.9
0.598082	0.525658	MP	Herm	DLW249	2023_04_06_DLW249_syp5gfp_herm_01003_Statistics	51.68	syp-3het	SYP5GFP	4738340	91686.1
0.501548	0.41173	MP	Herm	DLW249	2023_04_06_DLW249_syp5gfp_herm_01003_Statistics	26.3	syp-3het	SYP5GFP	2077940	79009.1
0.564608	0.486152	MP	Herm	DLW249	2023_04_06_DLW249_syp5gfp_herm_01003_Statistics	40.82	syp-3het	SYP5GFP	3490350	85505.9
0.549022	0.467757	MP	Herm	DLW249	2023_04_06_DLW249_syp5gfp_herm_01003_Statistics	48.66	syp-3het	SYP5GFP	4229500	86919.4
0.537371	0.454007	MP	Herm	DLW249	2023_04_06_DLW249_syp5gfp_herm_01003_Statistics	34.93	syp-3het	SYP5GFP	2893700	82842.8
0.489238	0.397201	MP	Herm	DLW249	2023_04_06_DLW249_syp5gfp_herm_01003_Statistics	34.01	syp-3het	SYP5GFP	2794390	82163.8
0.432702	0.330478	EP	Herm	DLW249	2023_04_06_DLW249_syp5gfp_herm_01003_Statistics	20.49	syp-3het	SYP5GFP	1545790	75441.2
0.421134	0.316825	EP	Herm	DLW249	2023_04_06_DLW249_syp5gfp_herm_01003_Statistics	34.34	syp-3het	SYP5GFP	2675420	77909.7
0.440479	0.339655	MP	Herm	DLW249	2023_04_06_DLW249_syp5gfp_herm_01003_Statistics	21.93	syp-3het	SYP5GFP	1692930	77197
0.452202	0.353491	MP	Herm	DLW249	2023_04_06_DLW249_syp5gfp_herm_01003_Statistics	28.29	syp-3het	SYP5GFP	2091800	73941.3
0.423847	0.320027	EP	Herm	DLW249	2023_04_06_DLW249_syp5gfp_herm_01003_Statistics	28.32	syp-3het	SYP5GFP	2102140	74228.1
0.618938	0.550272	MP	Herm	DLW249	2023_04_06_DLW249_syp5gfp_herm_01003_Statistics	54.24	syp-3het	SYP5GFP	5314200	97975.7
0.649996	0.586927	MP	Herm	DLW249	2023_04_06_DLW249_syp5gfp_herm_01003_Statistics	55.84	syp-3het	SYP5GFP	5616960	100590
0.47278	0.377777	MP	Herm	DLW249	2023_04_06_DLW249_syp5gfp_herm_01003_Statistics	37.47	syp-3het	SYP5GFP	3000680	80082.2
0.503263	0.413753	MP	Herm	DLW249	2023_04_06_DLW249_syp5gfp_herm_01003_Statistics	44.58	syp-3het	SYP5GFP	3640600	81664.4
0.457521	0.359768	MP	Herm	DLW249	2023_04_06_DLW249_syp5gfp_herm_01003_Statistics	29.97	syp-3het	SYP5GFP	2336100	77947.9
0.908311	0.891788	LP	Herm	DLW249	2023_04_06_DLW249_syp5gfp_herm_01003_Statistics	68.67	syp-3het	SYP5GFP	8657410	126073
0.914133	0.89866	LP	Herm	DLW249	2023_04_06_DLW249_syp5gfp_herm_01003_Statistics	57.24	syp-3het	SYP5GFP	7362310	128622
0.917814	0.903004	LP	Herm	DLW249	2023_04_06_DLW249_syp5gfp_herm_01003_Statistics	59.64	syp-3het	SYP5GFP	7457730	125046
0.886322	0.865838	LP	Herm	DLW249	2023_04_06_DLW249_syp5gfp_herm_01003_Statistics	63.45	syp-3het	SYP5GFP	7462180	117607
0.876356	0.854075	LP	Herm	DLW249	2023_04_06_DLW249_syp5gfp_herm_01003_Statistics	63.87	syp-3het	SYP5GFP	8484090	132834
0.862963	0.838269	LP	Herm	DLW249	2023_04_06_DLW249_syp5gfp_herm_01003_Statistics	74.94	syp-3het	SYP5GFP	8998300	120073
0.839625	0.810727	LP	Herm	DLW249	2023_04_06_DLW249_syp5gfp_herm_01003_Statistics	70.9	syp-3het	SYP5GFP	8498300	119863
0.850908	0.824042	LP	Herm	DLW249	2023_04_06_DLW249_syp5gfp_herm_01003_Statistics	60.32	syp-3het	SYP5GFP	7348130	121819
0.819158	0.786571	LP	Herm	DLW249	2023_04_06_DLW249_syp5gfp_herm_01003_Statistics	70.84	syp-3het	SYP5GFP	8289530	117018
0.823334	0.791499	LP	Herm	DLW249	2023_04_06_DLW249_syp5gfp_herm_01003_Statistics	62.54	syp-3het	SYP5GFP	6999130	111914
0.815394	0.782128	LP	Herm	DLW249	2023_04_06_DLW249_syp5gfp_herm_01003_Statistics	68.74	syp-3het	SYP5GFP	7686810	111824
0.779393	0.73964	LP	Herm	DLW249	2023_04_06_DLW249_syp5gfp_herm_01003_Statistics	68.64	syp-3het	SYP5GFP	8038440	117110
[truncated: 6,336 more rows]
