# Supplementary material for: Sexual dimorphic regulation of recombination by the synaptonemal complex in C. elegans
Source: eLife journal article supplement (doi:10.7554/elife.84538), 2023-10-05
Supplement: supp [file elife_poa_e84538_Figure_6_figure_supplement_1.pdf › elife_poa_e84538_Figure_6_figure_supplement_1.pdf]

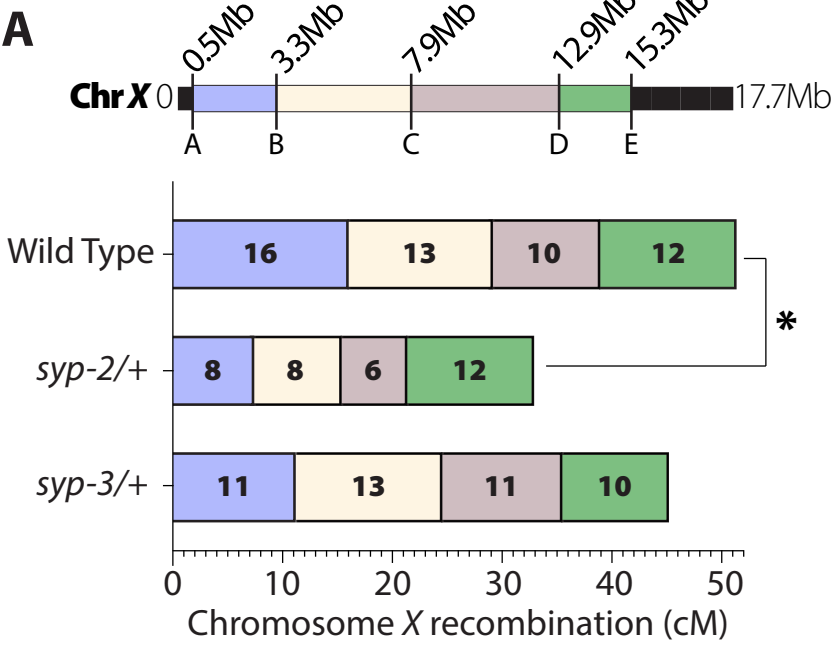

**B**

|                                     | Live herm. progeny | Male progeny | Dead egg  | n  | Total mutant progeny/Total non-mutant progeny | n     |
|-------------------------------------|--------------------|--------------|-----------|----|-----------------------------------------------|-------|
| ♀ N2/CB4856                         | 2484               | 1            | 483       | 10 | 4/1239                                        | 5     |
| ♀ N2 <i>syp-2</i> /CB4856           | 1608               | 2            | 375       | 7  | 7/1111                                        | 5     |
| ♀ N2 <i>syp-3</i> /CB4846           | 2155               | 35           | 593       | 10 | 10/1172                                       | 5     |
| ♀ N2/N2                             | 3517               | 6            | 17        | 10 | 1/1724                                        | 5     |
| ♀ <i>syp-2</i> /N2                  | 3318               | 8            | 13        | 10 | 1/1690                                        | 5     |
| ♀ <i>syp-3</i> /N2                  | 3331               | 24           | 39        | 10 | 8/1699                                        | 5     |
|                                     | Live progeny       | -----        | Dead eggs | n  | -----                                         | ----- |
| ♂ N2/N2 X ♀ <i>fog-2</i>            | 3637               | -----        | 28        | 10 | -----                                         | ----- |
| ♂ <i>syp-2</i> /N2 X ♀ <i>fog-2</i> | 3506               | -----        | 30        | 10 | -----                                         | ----- |
| ♂ <i>syp-3</i> /N2 X ♀ <i>fog-2</i> | 3217               | -----        | 33        | 9  | -----                                         | ----- |
