# Supplementary material for: Sexual dimorphic regulation of recombination by the synaptonemal complex in C. elegans
Source: eLife journal article supplement (doi:10.7554/elife.84538), 2023-10-05
Supplement: supp [file elife_poa_e84538_Supplementary_file_1.xlsx]

## Sheet: Sheet1
Supplemental file 1: Primer sequences used for CRISPR/Cas9 tagging the N-terminus of syp-3 with piRNA optimized mCherry
*All DNA sequences are presented in the 5′ to 3′ direction
syp-3 sgRNA-1	GACCGATTCAAAATTTTCTG
syp-3 sgRNA-2	CTTGTCAGTCAGGCAGTAAA
syp-3 screening primer (reverse, inside unc-119 transgene)	CGCCCTAACTTTGAGCCAATTC
syp-3 screening primer (reverse, outside unc-119 transgene )	CTTAAGGTCACCAAGGGAGGAC
syp-3 screening primer (forward, outside syp-3 insertion)	CATGTTGGACGGAGAGAAGGAA
