# Supplementary material for: Sexual dimorphic regulation of recombination by the synaptonemal complex in C. elegans
Source: eLife journal article supplement (doi:10.7554/elife.84538), 2023-10-05
Supplement: supp [file elife_poa_e84538_Supplementary_file_2.xlsx]

## Sheet: Sheet1
Supplemental file 2­: SNP recombination mapping of Chromosome II and X.
Chr	SNP	Genetic Map Position	Physical Base Pair Position	Primer Sequence (5’➞3’)	Restriction Enzyme	Bristol (N2) Restriction Fragments (bp)	Hawaiian (CB4856) Restriction Fragments (bp)
X	A	-19	0.5Mb	forward: GGTATACCGATCCCTTCAACAAG	BspHI	208, 156	364
				reverse: TGGCAAAACACA TCCCTGTG
X	B	-11.1	3.3Mb	forward: TCGTGGCACCATAAAAGTG	DraI	243	128, 115
				reverse: GATTCAGATCAAACAGAGGTGG
X	D	-0.76	7.9Mb	forward: GGTTCCTGGACGATAACGATGTGG	EcoRI	540, 228	768
				reverse: TCTCTCCTCTCTTTCCTCCCATTCAATC
X	D	10.1	12.9Mb	forward: GGCTCTGAGAAACCAACAAG	Sau3AI	318, 149	467
				reverse: TGTTTGCGATGACGTGTCAG
X	E	20.8	15.3Mb	forward: CGAGCAGAGATGCAGAGTTCTCAACTG	HaeIII	280, 300	580
				reverse: CGACCTGAAAGATGTGAGGTTCCTTATC
II	A	-17.9	0.15Mb	forward: CGGAGATAGTCTCGTGGTACTG	DraI	336, 93	288, 93, 48
				reverse: CAGTCATGCTCCAAACATTCTC
II	B	-4	4.5Mb	forward: TCATCTGTCGAGTGCTTTTG	TaqI	291, 81, 80	210, 81, 80, 70
				reverse: CGATCGCTCAAATGGTTG
II	C	3.3	11.1Mb	forward: TTCTCACAACTTCTTTTCCAAG	TaqI	572, 112, 15	382, 190, 112, 15
				reverse: TTCACTATTTCCCTCGCTGG
II	D	13.6	12.9Mb	forward: TAGGAAAGTTGTGTCCACCTGG	HinfI	449	288, 160
				reverse: TGATGACTCCTTCTTCAGCTGC
II	E	20.9	13.8Mb	forward: CGAGGAGATCCCACGGATTC	TaqI	482	340, 142
				reverse: CATCGTCGTTGGCCCAGATC
