# Supplementary material for: Sexual dimorphic regulation of recombination by the synaptonemal complex in C. elegans
Source: eLife journal article supplement (doi:10.7554/elife.84538), 2023-10-05
Supplement: supp [file Figure 3 - figure supplement 2 source data.xlsx]

## Sheet: Normalized
	WT herm	WT male	syp-2/+ herm	syp-2/+ male	syp-3/+ herm	syp-3/+ male	spo-11 herm	spo-11 male
gel1	0.789929	0.541281	2.02867	0.646603	1.77678	1.00496	1.75668	0.627436
gel2	0.838378	0.672433	0.811864	0.881542	1.86881	0.817006	1.81243	0.690197
gel3	1.16394	1.05498	0.899775	0.78803	0.799484	0.587196	0.90305	0.605313

## Sheet: raw data
	syp-2	800 bg	syp-2 bg sub		tubulin	700 bg	tubulin bg sub	ratio syp-2/tubulin
WT herm	72.923	46.24	26.683		92.631	58.852	33.779	0.789929
WT male	66.916	46.284	20.632		98.716	60.599	38.117	0.541281
syp-2het herm	77.765	41.61	36.155		78.191	60.369	17.822	2.02867
syp-2het male	54.376	39.691	14.685		80.049	57.338	22.711	0.646603
syp-3het herm	88.401	45.545	42.856		76.919	52.799	24.12	1.77678
syp-3het male	75.258	51.576	23.682		75.478	51.913	23.565	1.00496
spo11 herm	84.613	52.847	31.766		62.476	44.393	18.083	1.75668
spo11 male	84.558	69.231	15.327		75.028	50.6	24.428	0.627436
WT herm	41.421	28.458	12.963		70.977	55.515	15.462	0.838378
WT male	46.576	31.572	15.004		82.072	59.759	22.313	0.672433
syp-2het herm	49.977	25.479	24.498		94.7	64.525	30.175	0.811864
syp-2het male	33.322	18.163	15.159		81.594	64.398	17.196	0.881542
syp-3het herm	61.027	22.664	38.363		76.829	56.301	20.528	1.86881
syp-3het male	35.875	26.017	9.858		70.26	58.194	12.066	0.817006
spo11 herm	87.664	46.734	40.93		80.158	57.575	22.583	1.81243
spo11 male	53.529	41.053	12.476		60.374	42.298	18.076	0.690197
WT herm	115.945	99.424	16.521		62.902	48.708	14.194	1.16394
WT male	103.138	95.635	7.503		55.827	48.715	7.112	1.05498
syp-2het herm	102.072	90.051	12.021		61.832	48.472	13.36	0.899775
syp-2het male	89.81	83.635	6.175		57.019	49.183	7.836	0.78803
syp-3het herm	95.338	87.894	7.444		56.414	47.103	9.311	0.799484
syp-3het male	85.972	81.184	4.788		56.153	47.999	8.154	0.587196
spo11 herm	85.191	79.211	5.98		49.834	43.212	6.622	0.90305
spo11 male	96.781	88.852	7.929		57.895	44.796	13.099	0.605313
