# Supplementary material for: Sexual dimorphic regulation of recombination by the synaptonemal complex in C. elegans
Source: eLife journal article supplement (doi:10.7554/elife.84538), 2023-10-05
Supplement: supp [file Figure 4 - figure supplement 1 source data meiosis stages.xlsx]

## Sheet: Sheet1
Explanation of the column identifiers: (1) Length shows the length between individual measured segments; (2) cum_length is the progressive cumulative length of the segments in one germline; (3) meiosis_stage is the stage of meiosis determined by DAPI morphology; (4) length_normd is the normalized germline length from PMT (pre-meiotic tip) to the end of Pachytene.
length	cum_length	meiosis_stage	length_normd	Sex	Genotype	image_name
44.9534	44.9534	PMT	0.120811	herm	WT	2022_07_31_NSV129_555syp1_488gfpmsh5_dapi_herm1_stitched
14.1407	59.0941	PMT	0.158814	herm	WT	2022_07_31_NSV129_555syp1_488gfpmsh5_dapi_herm1_stitched
14.3956	73.4897	PMT	0.197501	herm	WT	2022_07_31_NSV129_555syp1_488gfpmsh5_dapi_herm1_stitched
10.2773	83.7669	Transition Zone	0.225121	herm	WT	2022_07_31_NSV129_555syp1_488gfpmsh5_dapi_herm1_stitched
13.145	96.9119	Transition Zone	0.260448	herm	WT	2022_07_31_NSV129_555syp1_488gfpmsh5_dapi_herm1_stitched
14.7713	111.683	Transition Zone	0.300145	herm	WT	2022_07_31_NSV129_555syp1_488gfpmsh5_dapi_herm1_stitched
109.426	221.109	Pachytene	0.594223	herm	WT	2022_07_31_NSV129_555syp1_488gfpmsh5_dapi_herm1_stitched
61.0343	282.143	Pachytene	0.758251	herm	WT	2022_07_31_NSV129_555syp1_488gfpmsh5_dapi_herm1_stitched
89.9541	372.097	Pachytene	1	herm	WT	2022_07_31_NSV129_555syp1_488gfpmsh5_dapi_herm1_stitched
18.8854	18.8854	PMT	0.0556416	herm	WT	2022_07_31_NSV129_555syp1_488gfpmsh5_dapi_herm2_stitched
12.8116	31.6969	PMT	0.093388	herm	WT	2022_07_31_NSV129_555syp1_488gfpmsh5_dapi_herm2_stitched
8.53073	40.2277	PMT	0.118522	herm	WT	2022_07_31_NSV129_555syp1_488gfpmsh5_dapi_herm2_stitched
7.00391	47.2316	PMT	0.139157	herm	WT	2022_07_31_NSV129_555syp1_488gfpmsh5_dapi_herm2_stitched
19.2523	66.4839	PMT	0.19588	herm	WT	2022_07_31_NSV129_555syp1_488gfpmsh5_dapi_herm2_stitched
10.0199	76.5038	PMT	0.225401	herm	WT	2022_07_31_NSV129_555syp1_488gfpmsh5_dapi_herm2_stitched
16.7539	93.2577	PMT	0.274763	herm	WT	2022_07_31_NSV129_555syp1_488gfpmsh5_dapi_herm2_stitched
18.5953	111.853	Transition Zone	0.32955	herm	WT	2022_07_31_NSV129_555syp1_488gfpmsh5_dapi_herm2_stitched
24.9205	136.773	Transition Zone	0.402973	herm	WT	2022_07_31_NSV129_555syp1_488gfpmsh5_dapi_herm2_stitched
17.6311	154.405	Transition Zone	0.454919	herm	WT	2022_07_31_NSV129_555syp1_488gfpmsh5_dapi_herm2_stitched
55.2992	209.704	Pachytene	0.617846	herm	WT	2022_07_31_NSV129_555syp1_488gfpmsh5_dapi_herm2_stitched
54.7831	264.487	Pachytene	0.779252	herm	WT	2022_07_31_NSV129_555syp1_488gfpmsh5_dapi_herm2_stitched
74.9242	339.411	Pachytene	1	herm	WT	2022_07_31_NSV129_555syp1_488gfpmsh5_dapi_herm2_stitched
46.2251	46.2251	PMT	0.13319	herm	WT	2022_07_31_NSV129_555syp1_488gfpmsh5_dapi_herm3_stitched
33.0727	79.2978	PMT	0.228483	herm	WT	2022_07_31_NSV129_555syp1_488gfpmsh5_dapi_herm3_stitched
13.4941	92.7919	Transition Zone	0.267364	herm	WT	2022_07_31_NSV129_555syp1_488gfpmsh5_dapi_herm3_stitched
14.6828	107.475	Transition Zone	0.30967	herm	WT	2022_07_31_NSV129_555syp1_488gfpmsh5_dapi_herm3_stitched
8.84439	116.319	Transition Zone	0.335153	herm	WT	2022_07_31_NSV129_555syp1_488gfpmsh5_dapi_herm3_stitched
63.7747	180.094	Pachytene	0.518909	herm	WT	2022_07_31_NSV129_555syp1_488gfpmsh5_dapi_herm3_stitched
26.264	206.358	Pachytene	0.594584	herm	WT	2022_07_31_NSV129_555syp1_488gfpmsh5_dapi_herm3_stitched
25.9189	232.277	Pachytene	0.669264	herm	WT	2022_07_31_NSV129_555syp1_488gfpmsh5_dapi_herm3_stitched
44.3261	276.603	Pachytene	0.796982	herm	WT	2022_07_31_NSV129_555syp1_488gfpmsh5_dapi_herm3_stitched
70.4598	347.063	Pachytene	1	herm	WT	2022_07_31_NSV129_555syp1_488gfpmsh5_dapi_herm3_stitched
27.074	27.074	PMT	0.0638877	herm	WT	2022_07_31_NSV129_555syp1_488gfpmsh5_dapi_herm4_stitched
24.387	51.4611	PMT	0.121435	herm	WT	2022_07_31_NSV129_555syp1_488gfpmsh5_dapi_herm4_stitched
44.1244	95.5855	PMT	0.225557	herm	WT	2022_07_31_NSV129_555syp1_488gfpmsh5_dapi_herm4_stitched
13.8394	109.425	Transition Zone	0.258214	herm	WT	2022_07_31_NSV129_555syp1_488gfpmsh5_dapi_herm4_stitched
54.5623	163.987	Transition Zone	0.386967	herm	WT	2022_07_31_NSV129_555syp1_488gfpmsh5_dapi_herm4_stitched
7.79574	171.783	Transition Zone	0.405363	herm	WT	2022_07_31_NSV129_555syp1_488gfpmsh5_dapi_herm4_stitched
56.4364	228.219	Pachytene	0.538538	herm	WT	2022_07_31_NSV129_555syp1_488gfpmsh5_dapi_herm4_stitched
32.3524	260.572	Pachytene	0.614881	herm	WT	2022_07_31_NSV129_555syp1_488gfpmsh5_dapi_herm4_stitched
75.5345	336.106	Pachytene	0.793123	herm	WT	2022_07_31_NSV129_555syp1_488gfpmsh5_dapi_herm4_stitched
87.6697	423.776	Pachytene	1	herm	WT	2022_07_31_NSV129_555syp1_488gfpmsh5_dapi_herm4_stitched
41.2177	41.2177	PMT	0.112381	male	WT	2022_07_31_NSV129_555syp1_488gfpmsh5_dapi_male2_stitched
24.3402	65.5579	PMT	0.178745	male	WT	2022_07_31_NSV129_555syp1_488gfpmsh5_dapi_male2_stitched
27.8031	93.361	PMT	0.254551	male	WT	2022_07_31_NSV129_555syp1_488gfpmsh5_dapi_male2_stitched
28.3593	121.72	PMT	0.331873	male	WT	2022_07_31_NSV129_555syp1_488gfpmsh5_dapi_male2_stitched
12.5457	134.266	Transition Zone	0.366079	male	WT	2022_07_31_NSV129_555syp1_488gfpmsh5_dapi_male2_stitched
23.6241	157.89	Transition Zone	0.430491	male	WT	2022_07_31_NSV129_555syp1_488gfpmsh5_dapi_male2_stitched
5.31371	163.204	Transition Zone	0.444979	male	WT	2022_07_31_NSV129_555syp1_488gfpmsh5_dapi_male2_stitched
6.8658	170.07	Transition Zone	0.463698	male	WT	2022_07_31_NSV129_555syp1_488gfpmsh5_dapi_male2_stitched
26.1214	196.191	Pachytene	0.534919	male	WT	2022_07_31_NSV129_555syp1_488gfpmsh5_dapi_male2_stitched
38.8658	235.057	Pachytene	0.640887	male	WT	2022_07_31_NSV129_555syp1_488gfpmsh5_dapi_male2_stitched
25.522	260.579	Pachytene	0.710474	male	WT	2022_07_31_NSV129_555syp1_488gfpmsh5_dapi_male2_stitched
26.7475	287.326	Pachytene	0.783401	male	WT	2022_07_31_NSV129_555syp1_488gfpmsh5_dapi_male2_stitched
32.577	319.903	Pachytene	0.872223	male	WT	2022_07_31_NSV129_555syp1_488gfpmsh5_dapi_male2_stitched
26.9292	346.833	Pachytene	0.945646	male	WT	2022_07_31_NSV129_555syp1_488gfpmsh5_dapi_male2_stitched
19.9351	366.768	Pachytene	1	male	WT	2022_07_31_NSV129_555syp1_488gfpmsh5_dapi_male2_stitched
26.0108	26.0108	PMT	0.0684322	male	WT	2022_07_31_NSV129_555syp1_488gfpmsh5_dapi_male4_stitched
43.2927	69.3035	PMT	0.182332	male	WT	2022_07_31_NSV129_555syp1_488gfpmsh5_dapi_male4_stitched
20.6131	89.9165	PMT	0.236563	male	WT	2022_07_31_NSV129_555syp1_488gfpmsh5_dapi_male4_stitched
20.7242	110.641	PMT	0.291087	male	WT	2022_07_31_NSV129_555syp1_488gfpmsh5_dapi_male4_stitched
17.0453	127.686	PMT	0.335931	male	WT	2022_07_31_NSV129_555syp1_488gfpmsh5_dapi_male4_stitched
17.8949	145.581	Transition Zone	0.383011	male	WT	2022_07_31_NSV129_555syp1_488gfpmsh5_dapi_male4_stitched
19.4436	165.024	Transition Zone	0.434166	male	WT	2022_07_31_NSV129_555syp1_488gfpmsh5_dapi_male4_stitched
13.8242	178.849	Transition Zone	0.470536	male	WT	2022_07_31_NSV129_555syp1_488gfpmsh5_dapi_male4_stitched
24.674	203.523	Pachytene	0.535451	male	WT	2022_07_31_NSV129_555syp1_488gfpmsh5_dapi_male4_stitched
31.886	235.409	Pachytene	0.619341	male	WT	2022_07_31_NSV129_555syp1_488gfpmsh5_dapi_male4_stitched
35.6509	271.06	Pachytene	0.713135	male	WT	2022_07_31_NSV129_555syp1_488gfpmsh5_dapi_male4_stitched
23.3229	294.382	Pachytene	0.774496	male	WT	2022_07_31_NSV129_555syp1_488gfpmsh5_dapi_male4_stitched
32.0835	326.466	Pachytene	0.858905	male	WT	2022_07_31_NSV129_555syp1_488gfpmsh5_dapi_male4_stitched
53.6296	380.095	Pachytene	1	male	WT	2022_07_31_NSV129_555syp1_488gfpmsh5_dapi_male4_stitched
41.0651	41.0651	PMT	0.12149	male	WT	2022_07_31_NSV129_555syp1_488gfpmsh5_dapi_male6_stitched
24.8913	65.9564	PMT	0.195131	male	WT	2022_07_31_NSV129_555syp1_488gfpmsh5_dapi_male6_stitched
39.0787	105.035	PMT	0.310744	male	WT	2022_07_31_NSV129_555syp1_488gfpmsh5_dapi_male6_stitched
24.8226	129.858	Transition Zone	0.384181	male	WT	2022_07_31_NSV129_555syp1_488gfpmsh5_dapi_male6_stitched
24.2768	154.135	Transition Zone	0.456004	male	WT	2022_07_31_NSV129_555syp1_488gfpmsh5_dapi_male6_stitched
8.73837	162.873	Transition Zone	0.481856	male	WT	2022_07_31_NSV129_555syp1_488gfpmsh5_dapi_male6_stitched
11.0135	173.887	Pachytene	0.514439	male	WT	2022_07_31_NSV129_555syp1_488gfpmsh5_dapi_male6_stitched
16.5707	190.457	Pachytene	0.563463	male	WT	2022_07_31_NSV129_555syp1_488gfpmsh5_dapi_male6_stitched
33.9891	224.446	Pachytene	0.664019	male	WT	2022_07_31_NSV129_555syp1_488gfpmsh5_dapi_male6_stitched
25.1245	249.571	Pachytene	0.738349	male	WT	2022_07_31_NSV129_555syp1_488gfpmsh5_dapi_male6_stitched
24.8314	274.402	Pachytene	0.811813	male	WT	2022_07_31_NSV129_555syp1_488gfpmsh5_dapi_male6_stitched
31.1671	305.569	Pachytene	0.90402	male	WT	2022_07_31_NSV129_555syp1_488gfpmsh5_dapi_male6_stitched
32.4425	338.012	Pachytene	1	male	WT	2022_07_31_NSV129_555syp1_488gfpmsh5_dapi_male6_stitched
37.2199	37.2199	PMT	0.123058	male	WT	2022_07_31_NSV129_555syp1_488gfpmsh5_dapi_male8_stitched
22.4749	59.6948	PMT	0.197365	male	WT	2022_07_31_NSV129_555syp1_488gfpmsh5_dapi_male8_stitched
17.2088	76.9035	PMT	0.254261	male	WT	2022_07_31_NSV129_555syp1_488gfpmsh5_dapi_male8_stitched
22.9656	99.8691	PMT	0.330191	male	WT	2022_07_31_NSV129_555syp1_488gfpmsh5_dapi_male8_stitched
11.6822	111.551	Transition Zone	0.368815	male	WT	2022_07_31_NSV129_555syp1_488gfpmsh5_dapi_male8_stitched
17.5242	129.076	Transition Zone	0.426754	male	WT	2022_07_31_NSV129_555syp1_488gfpmsh5_dapi_male8_stitched
19.6532	148.729	Transition Zone	0.491732	male	WT	2022_07_31_NSV129_555syp1_488gfpmsh5_dapi_male8_stitched
15.0461	163.775	Pachytene	0.541478	male	WT	2022_07_31_NSV129_555syp1_488gfpmsh5_dapi_male8_stitched
13.2932	177.068	Pachytene	0.585429	male	WT	2022_07_31_NSV129_555syp1_488gfpmsh5_dapi_male8_stitched
7.72614	184.794	Pachytene	0.610973	male	WT	2022_07_31_NSV129_555syp1_488gfpmsh5_dapi_male8_stitched
11.1363	195.931	Pachytene	0.647792	male	WT	2022_07_31_NSV129_555syp1_488gfpmsh5_dapi_male8_stitched
8.23416	204.165	Pachytene	0.675016	male	WT	2022_07_31_NSV129_555syp1_488gfpmsh5_dapi_male8_stitched
22.5631	226.728	Pachytene	0.749615	male	WT	2022_07_31_NSV129_555syp1_488gfpmsh5_dapi_male8_stitched
23.0577	249.785	Pachytene	0.825849	male	WT	2022_07_31_NSV129_555syp1_488gfpmsh5_dapi_male8_stitched
52.6734	302.459	Pachytene	1	male	WT	2022_07_31_NSV129_555syp1_488gfpmsh5_dapi_male8_stitched
31.8235	31.8235	PMT	0.096387	male	WT	2022_07_31_NSV129_555syp1_488gfpmsh5_dapi_male9_stitched
11.735	43.5585	PMT	0.13193	male	WT	2022_07_31_NSV129_555syp1_488gfpmsh5_dapi_male9_stitched
11.4193	54.9778	PMT	0.166516	male	WT	2022_07_31_NSV129_555syp1_488gfpmsh5_dapi_male9_stitched
43.3472	98.325	PMT	0.297806	male	WT	2022_07_31_NSV129_555syp1_488gfpmsh5_dapi_male9_stitched
7.3646	105.69	Transition Zone	0.320112	male	WT	2022_07_31_NSV129_555syp1_488gfpmsh5_dapi_male9_stitched
26.2341	131.924	Transition Zone	0.39957	male	WT	2022_07_31_NSV129_555syp1_488gfpmsh5_dapi_male9_stitched
11.4408	143.364	Transition Zone	0.434222	male	WT	2022_07_31_NSV129_555syp1_488gfpmsh5_dapi_male9_stitched
20.34	163.705	Pachytene	0.495827	male	WT	2022_07_31_NSV129_555syp1_488gfpmsh5_dapi_male9_stitched
23.3626	187.067	Pachytene	0.566588	male	WT	2022_07_31_NSV129_555syp1_488gfpmsh5_dapi_male9_stitched
13.6718	200.739	Pachytene	0.607997	male	WT	2022_07_31_NSV129_555syp1_488gfpmsh5_dapi_male9_stitched
6.23182	206.971	Pachytene	0.626872	male	WT	2022_07_31_NSV129_555syp1_488gfpmsh5_dapi_male9_stitched
10.7359	217.707	Pachytene	0.659389	male	WT	2022_07_31_NSV129_555syp1_488gfpmsh5_dapi_male9_stitched
14.6729	232.38	Pachytene	0.70383	male	WT	2022_07_31_NSV129_555syp1_488gfpmsh5_dapi_male9_stitched
27.5238	259.903	Pachytene	0.787194	male	WT	2022_07_31_NSV129_555syp1_488gfpmsh5_dapi_male9_stitched
18.4509	278.354	Pachytene	0.843078	male	WT	2022_07_31_NSV129_555syp1_488gfpmsh5_dapi_male9_stitched
51.8101	330.164	Pachytene	1	male	WT	2022_07_31_NSV129_555syp1_488gfpmsh5_dapi_male9_stitched
53.4881	53.4881	PMT	0.158382	herm	syp2het	2022_08_01_DLW208het_555syp1_488gfpmsh5_dapi_herm2_stitched
20.8675	74.3556	PMT	0.220172	herm	syp2het	2022_08_01_DLW208het_555syp1_488gfpmsh5_dapi_herm2_stitched
20.8286	95.1841	Transition Zone	0.281847	herm	syp2het	2022_08_01_DLW208het_555syp1_488gfpmsh5_dapi_herm2_stitched
14.977	110.161	Transition Zone	0.326195	herm	syp2het	2022_08_01_DLW208het_555syp1_488gfpmsh5_dapi_herm2_stitched
37.2132	147.374	Transition Zone	0.436386	herm	syp2het	2022_08_01_DLW208het_555syp1_488gfpmsh5_dapi_herm2_stitched
22.4509	169.825	Pachytene	0.502864	herm	syp2het	2022_08_01_DLW208het_555syp1_488gfpmsh5_dapi_herm2_stitched
41.9441	211.769	Pachytene	0.627064	herm	syp2het	2022_08_01_DLW208het_555syp1_488gfpmsh5_dapi_herm2_stitched
51.6267	263.396	Pachytene	0.779934	herm	syp2het	2022_08_01_DLW208het_555syp1_488gfpmsh5_dapi_herm2_stitched
38.8243	302.22	Pachytene	0.894896	herm	syp2het	2022_08_01_DLW208het_555syp1_488gfpmsh5_dapi_herm2_stitched
35.4954	337.716	Pachytene	1	herm	syp2het	2022_08_01_DLW208het_555syp1_488gfpmsh5_dapi_herm2_stitched
16.5485	16.5485	PMT	0.0525365	herm	syp2het	2022_08_01_DLW208het_555syp1_488gfpmsh5_dapi_herm3_stitched
47.668	64.2165	PMT	0.203868	herm	syp2het	2022_08_01_DLW208het_555syp1_488gfpmsh5_dapi_herm3_stitched
15.2687	79.4852	PMT	0.252342	herm	syp2het	2022_08_01_DLW208het_555syp1_488gfpmsh5_dapi_herm3_stitched
14.9564	94.4416	Transition Zone	0.299824	herm	syp2het	2022_08_01_DLW208het_555syp1_488gfpmsh5_dapi_herm3_stitched
54.4032	148.845	Transition Zone	0.472538	herm	syp2het	2022_08_01_DLW208het_555syp1_488gfpmsh5_dapi_herm3_stitched
30.2657	179.111	Pachytene	0.568623	herm	syp2het	2022_08_01_DLW208het_555syp1_488gfpmsh5_dapi_herm3_stitched
31.273	210.383	Pachytene	0.667906	herm	syp2het	2022_08_01_DLW208het_555syp1_488gfpmsh5_dapi_herm3_stitched
48.4118	258.795	Pachytene	0.821599	herm	syp2het	2022_08_01_DLW208het_555syp1_488gfpmsh5_dapi_herm3_stitched
56.1946	314.99	Pachytene	1	herm	syp2het	2022_08_01_DLW208het_555syp1_488gfpmsh5_dapi_herm3_stitched
55.4987	55.4987	PMT	0.139007	herm	syp2het	2022_08_01_DLW208het_555syp1_488gfpmsh5_dapi_herm4_stitched
14.4832	69.9819	PMT	0.175283	herm	syp2het	2022_08_01_DLW208het_555syp1_488gfpmsh5_dapi_herm4_stitched
9.20922	79.1911	Transition Zone	0.198349	herm	syp2het	2022_08_01_DLW208het_555syp1_488gfpmsh5_dapi_herm4_stitched
27.5217	106.713	Transition Zone	0.267282	herm	syp2het	2022_08_01_DLW208het_555syp1_488gfpmsh5_dapi_herm4_stitched
25.9006	132.613	Transition Zone	0.332155	herm	syp2het	2022_08_01_DLW208het_555syp1_488gfpmsh5_dapi_herm4_stitched
27.9219	160.535	Transition Zone	0.402091	herm	syp2het	2022_08_01_DLW208het_555syp1_488gfpmsh5_dapi_herm4_stitched
32.6253	193.161	Pachytene	0.483807	herm	syp2het	2022_08_01_DLW208het_555syp1_488gfpmsh5_dapi_herm4_stitched
45.0972	238.258	Pachytene	0.596762	herm	syp2het	2022_08_01_DLW208het_555syp1_488gfpmsh5_dapi_herm4_stitched
61.9058	300.164	Pachytene	0.751817	herm	syp2het	2022_08_01_DLW208het_555syp1_488gfpmsh5_dapi_herm4_stitched
39.5222	339.686	Pachytene	0.850807	herm	syp2het	2022_08_01_DLW208het_555syp1_488gfpmsh5_dapi_herm4_stitched
59.5654	399.251	Pachytene	1	herm	syp2het	2022_08_01_DLW208het_555syp1_488gfpmsh5_dapi_herm4_stitched
42.4748	42.4748	PMT	0.130322	herm	syp2het	2022_08_01_DLW208het_555syp1_488gfpmsh5_dapi_herm5_stitched
21.6049	64.0796	PMT	0.19661	herm	syp2het	2022_08_01_DLW208het_555syp1_488gfpmsh5_dapi_herm5_stitched
11.4772	75.5568	PMT	0.231824	herm	syp2het	2022_08_01_DLW208het_555syp1_488gfpmsh5_dapi_herm5_stitched
7.48554	83.0423	Transition Zone	0.254791	herm	syp2het	2022_08_01_DLW208het_555syp1_488gfpmsh5_dapi_herm5_stitched
13.5487	96.591	Transition Zone	0.296362	herm	syp2het	2022_08_01_DLW208het_555syp1_488gfpmsh5_dapi_herm5_stitched
25.9617	122.553	Transition Zone	0.376018	herm	syp2het	2022_08_01_DLW208het_555syp1_488gfpmsh5_dapi_herm5_stitched
34.7726	157.325	Pachytene	0.482707	herm	syp2het	2022_08_01_DLW208het_555syp1_488gfpmsh5_dapi_herm5_stitched
37.3425	194.668	Pachytene	0.597282	herm	syp2het	2022_08_01_DLW208het_555syp1_488gfpmsh5_dapi_herm5_stitched
30.2444	224.912	Pachytene	0.690078	herm	syp2het	2022_08_01_DLW208het_555syp1_488gfpmsh5_dapi_herm5_stitched
35.6309	260.543	Pachytene	0.799401	herm	syp2het	2022_08_01_DLW208het_555syp1_488gfpmsh5_dapi_herm5_stitched
13.2924	273.836	Pachytene	0.840185	herm	syp2het	2022_08_01_DLW208het_555syp1_488gfpmsh5_dapi_herm5_stitched
52.0872	325.923	Pachytene	1	herm	syp2het	2022_08_01_DLW208het_555syp1_488gfpmsh5_dapi_herm5_stitched
41.0235	41.0235	PMT	0.126489	male	syp2het	2022_08_01_DLW208het_555syp1_488gfpmsh5_dapi_male1_stitched
32.8588	73.8823	PMT	0.227804	male	syp2het	2022_08_01_DLW208het_555syp1_488gfpmsh5_dapi_male1_stitched
17.3537	91.236	PMT	0.281312	male	syp2het	2022_08_01_DLW208het_555syp1_488gfpmsh5_dapi_male1_stitched
16.0439	107.28	PMT	0.33078	male	syp2het	2022_08_01_DLW208het_555syp1_488gfpmsh5_dapi_male1_stitched
4.3983	111.678	PMT	0.344342	male	syp2het	2022_08_01_DLW208het_555syp1_488gfpmsh5_dapi_male1_stitched
17.7877	129.466	PMT	0.399187	male	syp2het	2022_08_01_DLW208het_555syp1_488gfpmsh5_dapi_male1_stitched
3.87636	133.342	Transition Zone	0.411139	male	syp2het	2022_08_01_DLW208het_555syp1_488gfpmsh5_dapi_male1_stitched
31.7127	165.055	Transition Zone	0.50892	male	syp2het	2022_08_01_DLW208het_555syp1_488gfpmsh5_dapi_male1_stitched
8.79707	173.852	Transition Zone	0.536045	male	syp2het	2022_08_01_DLW208het_555syp1_488gfpmsh5_dapi_male1_stitched
9.38116	183.233	Pachytene	0.56497	male	syp2het	2022_08_01_DLW208het_555syp1_488gfpmsh5_dapi_male1_stitched
10.179	193.412	Pachytene	0.596355	male	syp2het	2022_08_01_DLW208het_555syp1_488gfpmsh5_dapi_male1_stitched
11.8365	205.249	Pachytene	0.632851	male	syp2het	2022_08_01_DLW208het_555syp1_488gfpmsh5_dapi_male1_stitched
19.3916	224.64	Pachytene	0.692642	male	syp2het	2022_08_01_DLW208het_555syp1_488gfpmsh5_dapi_male1_stitched
16.7919	241.432	Pachytene	0.744417	male	syp2het	2022_08_01_DLW208het_555syp1_488gfpmsh5_dapi_male1_stitched
21.843	263.275	Pachytene	0.811767	male	syp2het	2022_08_01_DLW208het_555syp1_488gfpmsh5_dapi_male1_stitched
26.5622	289.837	Pachytene	0.893667	male	syp2het	2022_08_01_DLW208het_555syp1_488gfpmsh5_dapi_male1_stitched
34.4864	324.324	Pachytene	1	male	syp2het	2022_08_01_DLW208het_555syp1_488gfpmsh5_dapi_male1_stitched
35.2914	35.2914	PMT	0.120797	male	syp2het	2022_08_01_DLW208het_555syp1_488gfpmsh5_dapi_male3_stitched
10.7401	46.0315	PMT	0.157559	male	syp2het	2022_08_01_DLW208het_555syp1_488gfpmsh5_dapi_male3_stitched
21.1081	67.1395	PMT	0.229809	male	syp2het	2022_08_01_DLW208het_555syp1_488gfpmsh5_dapi_male3_stitched
14.0098	81.1494	PMT	0.277762	male	syp2het	2022_08_01_DLW208het_555syp1_488gfpmsh5_dapi_male3_stitched
10.0178	91.1671	Transition Zone	0.312051	male	syp2het	2022_08_01_DLW208het_555syp1_488gfpmsh5_dapi_male3_stitched
13.1991	104.366	Transition Zone	0.35723	male	syp2het	2022_08_01_DLW208het_555syp1_488gfpmsh5_dapi_male3_stitched
12.722	117.088	Transition Zone	0.400775	male	syp2het	2022_08_01_DLW208het_555syp1_488gfpmsh5_dapi_male3_stitched
15.1178	132.206	Transition Zone	0.452521	male	syp2het	2022_08_01_DLW208het_555syp1_488gfpmsh5_dapi_male3_stitched
9.8139	142.02	Pachytene	0.486113	male	syp2het	2022_08_01_DLW208het_555syp1_488gfpmsh5_dapi_male3_stitched
19.1203	161.14	Pachytene	0.551559	male	syp2het	2022_08_01_DLW208het_555syp1_488gfpmsh5_dapi_male3_stitched
19.1533	180.293	Pachytene	0.617118	male	syp2het	2022_08_01_DLW208het_555syp1_488gfpmsh5_dapi_male3_stitched
11.0864	191.38	Pachytene	0.655065	male	syp2het	2022_08_01_DLW208het_555syp1_488gfpmsh5_dapi_male3_stitched
27.1777	218.558	Pachytene	0.74809	male	syp2het	2022_08_01_DLW208het_555syp1_488gfpmsh5_dapi_male3_stitched
34.1872	252.745	Pachytene	0.865107	male	syp2het	2022_08_01_DLW208het_555syp1_488gfpmsh5_dapi_male3_stitched
39.4094	292.154	Pachytene	1	male	syp2het	2022_08_01_DLW208het_555syp1_488gfpmsh5_dapi_male3_stitched
26.0681	26.0681	PMT	0.0524606	male	syp2het	2022_08_01_DLW208het_555syp1_488gfpmsh5_dapi_male4_stitched
24.2438	50.3119	PMT	0.10125	male	syp2het	2022_08_01_DLW208het_555syp1_488gfpmsh5_dapi_male4_stitched
16.8488	67.1607	PMT	0.135157	male	syp2het	2022_08_01_DLW208het_555syp1_488gfpmsh5_dapi_male4_stitched
16.7705	83.9312	PMT	0.168907	male	syp2het	2022_08_01_DLW208het_555syp1_488gfpmsh5_dapi_male4_stitched
19.9127	103.844	PMT	0.20898	male	syp2het	2022_08_01_DLW208het_555syp1_488gfpmsh5_dapi_male4_stitched
24.5961	128.44	PMT	0.258478	male	syp2het	2022_08_01_DLW208het_555syp1_488gfpmsh5_dapi_male4_stitched
13.2806	141.721	PMT	0.285205	male	syp2het	2022_08_01_DLW208het_555syp1_488gfpmsh5_dapi_male4_stitched
15.2609	156.982	PMT	0.315917	male	syp2het	2022_08_01_DLW208het_555syp1_488gfpmsh5_dapi_male4_stitched
12.033	169.015	PMT	0.340132	male	syp2het	2022_08_01_DLW208het_555syp1_488gfpmsh5_dapi_male4_stitched
20.6446	189.659	Transition Zone	0.381679	male	syp2het	2022_08_01_DLW208het_555syp1_488gfpmsh5_dapi_male4_stitched
20.8056	210.465	Transition Zone	0.423549	male	syp2het	2022_08_01_DLW208het_555syp1_488gfpmsh5_dapi_male4_stitched
16.219	226.684	Transition Zone	0.456189	male	syp2het	2022_08_01_DLW208het_555syp1_488gfpmsh5_dapi_male4_stitched
23.1408	249.825	Transition Zone	0.502758	male	syp2het	2022_08_01_DLW208het_555syp1_488gfpmsh5_dapi_male4_stitched
26.5142	276.339	Pachytene	0.556117	male	syp2het	2022_08_01_DLW208het_555syp1_488gfpmsh5_dapi_male4_stitched
39.2911	315.63	Pachytene	0.635188	male	syp2het	2022_08_01_DLW208het_555syp1_488gfpmsh5_dapi_male4_stitched
41.5185	357.148	Pachytene	0.718741	male	syp2het	2022_08_01_DLW208het_555syp1_488gfpmsh5_dapi_male4_stitched
53.1494	410.298	Pachytene	0.825702	male	syp2het	2022_08_01_DLW208het_555syp1_488gfpmsh5_dapi_male4_stitched
86.6103	496.908	Pachytene	1	male	syp2het	2022_08_01_DLW208het_555syp1_488gfpmsh5_dapi_male4_stitched
39.2993	39.2993	PMT	0.133527	herm	syp3het	2022_08_01_DLW209het_555syp1_488gfpmsh5_dapi_herm2_stitched
10.6686	49.9679	PMT	0.169775	herm	syp3het	2022_08_01_DLW209het_555syp1_488gfpmsh5_dapi_herm2_stitched
12.5088	62.4768	Transition Zone	0.212276	herm	syp3het	2022_08_01_DLW209het_555syp1_488gfpmsh5_dapi_herm2_stitched
27.9028	90.3795	Transition Zone	0.307081	herm	syp3het	2022_08_01_DLW209het_555syp1_488gfpmsh5_dapi_herm2_stitched
9.65003	100.03	Transition Zone	0.339869	herm	syp3het	2022_08_01_DLW209het_555syp1_488gfpmsh5_dapi_herm2_stitched
25.8673	125.897	Pachytene	0.427758	herm	syp3het	2022_08_01_DLW209het_555syp1_488gfpmsh5_dapi_herm2_stitched
45.6306	171.527	Pachytene	0.582796	herm	syp3het	2022_08_01_DLW209het_555syp1_488gfpmsh5_dapi_herm2_stitched
41.4698	212.997	Pachytene	0.723697	herm	syp3het	2022_08_01_DLW209het_555syp1_488gfpmsh5_dapi_herm2_stitched
27.3816	240.379	Pachytene	0.816731	herm	syp3het	2022_08_01_DLW209het_555syp1_488gfpmsh5_dapi_herm2_stitched
20.736	261.115	Pachytene	0.887186	herm	syp3het	2022_08_01_DLW209het_555syp1_488gfpmsh5_dapi_herm2_stitched
33.2033	294.318	Pachytene	1	herm	syp3het	2022_08_01_DLW209het_555syp1_488gfpmsh5_dapi_herm2_stitched
42.5361	42.5361	PMT	0.119052	herm	syp3het	2022_08_01_DLW209het_555syp1_488gfpmsh5_dapi_herm3_stitched
21.2486	63.7847	PMT	0.178523	herm	syp3het	2022_08_01_DLW209het_555syp1_488gfpmsh5_dapi_herm3_stitched
15.4989	79.2836	PMT	0.221903	herm	syp3het	2022_08_01_DLW209het_555syp1_488gfpmsh5_dapi_herm3_stitched
22.0278	101.311	Transition Zone	0.283555	herm	syp3het	2022_08_01_DLW209het_555syp1_488gfpmsh5_dapi_herm3_stitched
16.1397	117.451	Transition Zone	0.328727	herm	syp3het	2022_08_01_DLW209het_555syp1_488gfpmsh5_dapi_herm3_stitched
27.168	144.619	Transition Zone	0.404767	herm	syp3het	2022_08_01_DLW209het_555syp1_488gfpmsh5_dapi_herm3_stitched
19.161	163.78	Transition Zone	0.458395	herm	syp3het	2022_08_01_DLW209het_555syp1_488gfpmsh5_dapi_herm3_stitched
61.9816	225.762	Pachytene	0.631872	herm	syp3het	2022_08_01_DLW209het_555syp1_488gfpmsh5_dapi_herm3_stitched
49.8476	275.609	Pachytene	0.771388	herm	syp3het	2022_08_01_DLW209het_555syp1_488gfpmsh5_dapi_herm3_stitched
81.6808	357.29	Pachytene	1	herm	syp3het	2022_08_01_DLW209het_555syp1_488gfpmsh5_dapi_herm3_stitched
31.9589	31.9589	PMT	0.0809066	herm	syp3het	2022_08_01_DLW209het_555syp1_488gfpmsh5_dapi_herm4_stitched
33.2073	65.1661	PMT	0.164973	herm	syp3het	2022_08_01_DLW209het_555syp1_488gfpmsh5_dapi_herm4_stitched
26.1516	91.3178	PMT	0.231178	herm	syp3het	2022_08_01_DLW209het_555syp1_488gfpmsh5_dapi_herm4_stitched
14.4203	105.738	PMT	0.267685	herm	syp3het	2022_08_01_DLW209het_555syp1_488gfpmsh5_dapi_herm4_stitched
25.68	131.418	Transition Zone	0.332696	herm	syp3het	2022_08_01_DLW209het_555syp1_488gfpmsh5_dapi_herm4_stitched
19.68	151.098	Transition Zone	0.382517	herm	syp3het	2022_08_01_DLW209het_555syp1_488gfpmsh5_dapi_herm4_stitched
15.8467	166.945	Transition Zone	0.422634	herm	syp3het	2022_08_01_DLW209het_555syp1_488gfpmsh5_dapi_herm4_stitched
13.3272	180.272	Transition Zone	0.456373	herm	syp3het	2022_08_01_DLW209het_555syp1_488gfpmsh5_dapi_herm4_stitched
22.9096	203.182	Pachytene	0.514371	herm	syp3het	2022_08_01_DLW209het_555syp1_488gfpmsh5_dapi_herm4_stitched
22.5916	225.773	Pachytene	0.571563	herm	syp3het	2022_08_01_DLW209het_555syp1_488gfpmsh5_dapi_herm4_stitched
40.635	266.408	Pachytene	0.674434	herm	syp3het	2022_08_01_DLW209het_555syp1_488gfpmsh5_dapi_herm4_stitched
41.6455	308.054	Pachytene	0.779863	herm	syp3het	2022_08_01_DLW209het_555syp1_488gfpmsh5_dapi_herm4_stitched
20.8824	328.936	Pachytene	0.832729	herm	syp3het	2022_08_01_DLW209het_555syp1_488gfpmsh5_dapi_herm4_stitched
14.024	342.96	Pachytene	0.868232	herm	syp3het	2022_08_01_DLW209het_555syp1_488gfpmsh5_dapi_herm4_stitched
15.1607	358.121	Pachytene	0.906612	herm	syp3het	2022_08_01_DLW209het_555syp1_488gfpmsh5_dapi_herm4_stitched
36.8891	395.01	Pachytene	1	herm	syp3het	2022_08_01_DLW209het_555syp1_488gfpmsh5_dapi_herm4_stitched
35.5288	35.5288	PMT	0.102478	male	syp3het	2022_08_01_DLW209het_555syp1_488gfpmsh5_dapi_male1_stitched
35.6575	71.1864	PMT	0.205327	male	syp3het	2022_08_01_DLW209het_555syp1_488gfpmsh5_dapi_male1_stitched
27.713	98.8994	PMT	0.285261	male	syp3het	2022_08_01_DLW209het_555syp1_488gfpmsh5_dapi_male1_stitched
8.79446	107.694	PMT	0.310627	male	syp3het	2022_08_01_DLW209het_555syp1_488gfpmsh5_dapi_male1_stitched
5.20423	112.898	Transition Zone	0.325638	male	syp3het	2022_08_01_DLW209het_555syp1_488gfpmsh5_dapi_male1_stitched
16.0578	128.956	Transition Zone	0.371954	male	syp3het	2022_08_01_DLW209het_555syp1_488gfpmsh5_dapi_male1_stitched
18.8689	147.825	Transition Zone	0.426379	male	syp3het	2022_08_01_DLW209het_555syp1_488gfpmsh5_dapi_male1_stitched
27.6267	175.451	Pachytene	0.506064	male	syp3het	2022_08_01_DLW209het_555syp1_488gfpmsh5_dapi_male1_stitched
29.4488	204.9	Pachytene	0.591005	male	syp3het	2022_08_01_DLW209het_555syp1_488gfpmsh5_dapi_male1_stitched
32.2163	237.117	Pachytene	0.683928	male	syp3het	2022_08_01_DLW209het_555syp1_488gfpmsh5_dapi_male1_stitched
68.2436	305.36	Pachytene	0.880767	male	syp3het	2022_08_01_DLW209het_555syp1_488gfpmsh5_dapi_male1_stitched
10.5268	315.887	Pachytene	0.91113	male	syp3het	2022_08_01_DLW209het_555syp1_488gfpmsh5_dapi_male1_stitched
30.8111	346.698	Pachytene	1	male	syp3het	2022_08_01_DLW209het_555syp1_488gfpmsh5_dapi_male1_stitched
34.195	34.195	PMT	0.093602	male	syp3het	2022_08_01_DLW209het_555syp1_488gfpmsh5_dapi_male2_stitched
25.1483	59.3433	PMT	0.16244	male	syp3het	2022_08_01_DLW209het_555syp1_488gfpmsh5_dapi_male2_stitched
32.1133	91.4566	PMT	0.250344	male	syp3het	2022_08_01_DLW209het_555syp1_488gfpmsh5_dapi_male2_stitched
9.92871	101.385	PMT	0.277522	male	syp3het	2022_08_01_DLW209het_555syp1_488gfpmsh5_dapi_male2_stitched
10.7147	112.1	Transition Zone	0.306851	male	syp3het	2022_08_01_DLW209het_555syp1_488gfpmsh5_dapi_male2_stitched
23.3057	135.406	Transition Zone	0.370646	male	syp3het	2022_08_01_DLW209het_555syp1_488gfpmsh5_dapi_male2_stitched
13.6027	149.008	Transition Zone	0.407881	male	syp3het	2022_08_01_DLW209het_555syp1_488gfpmsh5_dapi_male2_stitched
25.5466	174.555	Pachytene	0.477809	male	syp3het	2022_08_01_DLW209het_555syp1_488gfpmsh5_dapi_male2_stitched
23.5181	198.073	Pachytene	0.542185	male	syp3het	2022_08_01_DLW209het_555syp1_488gfpmsh5_dapi_male2_stitched
17.0232	215.096	Pachytene	0.588783	male	syp3het	2022_08_01_DLW209het_555syp1_488gfpmsh5_dapi_male2_stitched
19.1436	234.24	Pachytene	0.641185	male	syp3het	2022_08_01_DLW209het_555syp1_488gfpmsh5_dapi_male2_stitched
20.9984	255.238	Pachytene	0.698664	male	syp3het	2022_08_01_DLW209het_555syp1_488gfpmsh5_dapi_male2_stitched
41.8916	297.13	Pachytene	0.813333	male	syp3het	2022_08_01_DLW209het_555syp1_488gfpmsh5_dapi_male2_stitched
33.425	330.555	Pachytene	0.904828	male	syp3het	2022_08_01_DLW209het_555syp1_488gfpmsh5_dapi_male2_stitched
15.5203	346.075	Pachytene	0.947311	male	syp3het	2022_08_01_DLW209het_555syp1_488gfpmsh5_dapi_male2_stitched
19.2484	365.324	Pachytene	1	male	syp3het	2022_08_01_DLW209het_555syp1_488gfpmsh5_dapi_male2_stitched
32.2998	32.2998	PMT	0.0761268	male	syp3het	2022_08_01_DLW209het_555syp1_488gfpmsh5_dapi_male3_stitched
46.2171	78.5169	PMT	0.185055	male	syp3het	2022_08_01_DLW209het_555syp1_488gfpmsh5_dapi_male3_stitched
37.3959	115.913	PMT	0.273193	male	syp3het	2022_08_01_DLW209het_555syp1_488gfpmsh5_dapi_male3_stitched
32.5835	148.496	PMT	0.349989	male	syp3het	2022_08_01_DLW209het_555syp1_488gfpmsh5_dapi_male3_stitched
20.3792	168.876	Transition Zone	0.39802	male	syp3het	2022_08_01_DLW209het_555syp1_488gfpmsh5_dapi_male3_stitched
26.6263	195.502	Transition Zone	0.460775	male	syp3het	2022_08_01_DLW209het_555syp1_488gfpmsh5_dapi_male3_stitched
9.56015	205.062	Transition Zone	0.483308	male	syp3het	2022_08_01_DLW209het_555syp1_488gfpmsh5_dapi_male3_stitched
11.0635	216.126	Transition Zone	0.509383	male	syp3het	2022_08_01_DLW209het_555syp1_488gfpmsh5_dapi_male3_stitched
7.89942	224.025	Transition Zone	0.528001	male	syp3het	2022_08_01_DLW209het_555syp1_488gfpmsh5_dapi_male3_stitched
9.88683	233.912	Transition Zone	0.551303	male	syp3het	2022_08_01_DLW209het_555syp1_488gfpmsh5_dapi_male3_stitched
19.5743	253.486	Pachytene	0.597438	male	syp3het	2022_08_01_DLW209het_555syp1_488gfpmsh5_dapi_male3_stitched
26.0946	279.581	Pachytene	0.658939	male	syp3het	2022_08_01_DLW209het_555syp1_488gfpmsh5_dapi_male3_stitched
19.329	298.91	Pachytene	0.704496	male	syp3het	2022_08_01_DLW209het_555syp1_488gfpmsh5_dapi_male3_stitched
22.8699	321.78	Pachytene	0.758397	male	syp3het	2022_08_01_DLW209het_555syp1_488gfpmsh5_dapi_male3_stitched
39.6352	361.415	Pachytene	0.851813	male	syp3het	2022_08_01_DLW209het_555syp1_488gfpmsh5_dapi_male3_stitched
41.1953	402.61	Pachytene	0.948905	male	syp3het	2022_08_01_DLW209het_555syp1_488gfpmsh5_dapi_male3_stitched
21.6789	424.289	Pachytene	1	male	syp3het	2022_08_01_DLW209het_555syp1_488gfpmsh5_dapi_male3_stitched
42.6731	42.6731	PMT	0.119724	male	syp3het	2022_08_01_DLW209het_555syp1_488gfpmsh5_dapi_male4_stitched
19.4141	62.0873	PMT	0.174192	male	syp3het	2022_08_01_DLW209het_555syp1_488gfpmsh5_dapi_male4_stitched
24.9637	87.051	PMT	0.244231	male	syp3het	2022_08_01_DLW209het_555syp1_488gfpmsh5_dapi_male4_stitched
17.2219	104.273	PMT	0.292549	male	syp3het	2022_08_01_DLW209het_555syp1_488gfpmsh5_dapi_male4_stitched
9.15386	113.427	Transition Zone	0.318231	male	syp3het	2022_08_01_DLW209het_555syp1_488gfpmsh5_dapi_male4_stitched
24.9439	138.371	Transition Zone	0.388213	male	syp3het	2022_08_01_DLW209het_555syp1_488gfpmsh5_dapi_male4_stitched
13.0539	151.425	Transition Zone	0.424837	male	syp3het	2022_08_01_DLW209het_555syp1_488gfpmsh5_dapi_male4_stitched
28.2971	179.722	Pachytene	0.504228	male	syp3het	2022_08_01_DLW209het_555syp1_488gfpmsh5_dapi_male4_stitched
22.4117	202.133	Pachytene	0.567106	male	syp3het	2022_08_01_DLW209het_555syp1_488gfpmsh5_dapi_male4_stitched
10.1972	212.331	Pachytene	0.595716	male	syp3het	2022_08_01_DLW209het_555syp1_488gfpmsh5_dapi_male4_stitched
10.9566	223.287	Pachytene	0.626456	male	syp3het	2022_08_01_DLW209het_555syp1_488gfpmsh5_dapi_male4_stitched
10.1915	233.479	Pachytene	0.655049	male	syp3het	2022_08_01_DLW209het_555syp1_488gfpmsh5_dapi_male4_stitched
9.09199	242.571	Pachytene	0.680558	male	syp3het	2022_08_01_DLW209het_555syp1_488gfpmsh5_dapi_male4_stitched
26.0836	268.654	Pachytene	0.753738	male	syp3het	2022_08_01_DLW209het_555syp1_488gfpmsh5_dapi_male4_stitched
45.1472	313.802	Pachytene	0.880403	male	syp3het	2022_08_01_DLW209het_555syp1_488gfpmsh5_dapi_male4_stitched
42.6278	356.429	Pachytene	1	male	syp3het	2022_08_01_DLW209het_555syp1_488gfpmsh5_dapi_male4_stitched
36.2614	36.2614	PMT	0.113097	male	syp3het	2022_08_01_DLW209het_555syp1_488gfpmsh5_dapi_male5_stitched
18.4581	54.7195	PMT	0.170667	male	syp3het	2022_08_01_DLW209het_555syp1_488gfpmsh5_dapi_male5_stitched
13.5183	68.2379	PMT	0.212829	male	syp3het	2022_08_01_DLW209het_555syp1_488gfpmsh5_dapi_male5_stitched
12.5787	80.8166	PMT	0.252061	male	syp3het	2022_08_01_DLW209het_555syp1_488gfpmsh5_dapi_male5_stitched
15.9252	96.7418	Transition Zone	0.301731	male	syp3het	2022_08_01_DLW209het_555syp1_488gfpmsh5_dapi_male5_stitched
25.9253	122.667	Transition Zone	0.38259	male	syp3het	2022_08_01_DLW209het_555syp1_488gfpmsh5_dapi_male5_stitched
7.43848	130.106	Transition Zone	0.40579	male	syp3het	2022_08_01_DLW209het_555syp1_488gfpmsh5_dapi_male5_stitched
19.4892	149.595	Transition Zone	0.466576	male	syp3het	2022_08_01_DLW209het_555syp1_488gfpmsh5_dapi_male5_stitched
29.5009	179.096	Pachytene	0.558587	male	syp3het	2022_08_01_DLW209het_555syp1_488gfpmsh5_dapi_male5_stitched
16.5413	195.637	Pachytene	0.610178	male	syp3het	2022_08_01_DLW209het_555syp1_488gfpmsh5_dapi_male5_stitched
16.2714	211.908	Pachytene	0.660928	male	syp3het	2022_08_01_DLW209het_555syp1_488gfpmsh5_dapi_male5_stitched
14.7106	226.619	Pachytene	0.706809	male	syp3het	2022_08_01_DLW209het_555syp1_488gfpmsh5_dapi_male5_stitched
13.2396	239.859	Pachytene	0.748103	male	syp3het	2022_08_01_DLW209het_555syp1_488gfpmsh5_dapi_male5_stitched
34.6442	274.503	Pachytene	0.856155	male	syp3het	2022_08_01_DLW209het_555syp1_488gfpmsh5_dapi_male5_stitched
46.1198	320.622	Pachytene	1	male	syp3het	2022_08_01_DLW209het_555syp1_488gfpmsh5_dapi_male5_stitched
30.5329	30.5329	PMT	0.118316	herm	syp2het	2022_08_10_DLW208het_555syp1_488rad51_dapi_herm1_stitched
6.83191	37.3648	PMT	0.14479	herm	syp2het	2022_08_10_DLW208het_555syp1_488rad51_dapi_herm1_stitched
12.0555	49.4204	PMT	0.191506	herm	syp2het	2022_08_10_DLW208het_555syp1_488rad51_dapi_herm1_stitched
12.2937	61.7141	PMT	0.239144	herm	syp2het	2022_08_10_DLW208het_555syp1_488rad51_dapi_herm1_stitched
8.50173	70.2158	PMT	0.272089	herm	syp2het	2022_08_10_DLW208het_555syp1_488rad51_dapi_herm1_stitched
13.1794	83.3953	PMT	0.323159	herm	syp2het	2022_08_10_DLW208het_555syp1_488rad51_dapi_herm1_stitched
8.44203	91.8373	Transition Zone	0.355873	herm	syp2het	2022_08_10_DLW208het_555syp1_488rad51_dapi_herm1_stitched
25.8453	117.683	Transition Zone	0.456024	herm	syp2het	2022_08_10_DLW208het_555syp1_488rad51_dapi_herm1_stitched
20.2472	137.93	Pachytene	0.534482	herm	syp2het	2022_08_10_DLW208het_555syp1_488rad51_dapi_herm1_stitched
20.7965	158.726	Pachytene	0.61507	herm	syp2het	2022_08_10_DLW208het_555syp1_488rad51_dapi_herm1_stitched
22.491	181.217	Pachytene	0.702223	herm	syp2het	2022_08_10_DLW208het_555syp1_488rad51_dapi_herm1_stitched
29.333	210.55	Pachytene	0.815889	herm	syp2het	2022_08_10_DLW208het_555syp1_488rad51_dapi_herm1_stitched
47.512	258.062	Pachytene	1	herm	syp2het	2022_08_10_DLW208het_555syp1_488rad51_dapi_herm1_stitched
26.1021	26.1021	PMT	0.0912676	herm	syp2het	2022_08_10_DLW208het_555syp1_488rad51_dapi_herm2_stitched
21.6236	47.7257	PMT	0.166876	herm	syp2het	2022_08_10_DLW208het_555syp1_488rad51_dapi_herm2_stitched
17.888	65.6137	PMT	0.229422	herm	syp2het	2022_08_10_DLW208het_555syp1_488rad51_dapi_herm2_stitched
17.7454	83.3592	PMT	0.29147	herm	syp2het	2022_08_10_DLW208het_555syp1_488rad51_dapi_herm2_stitched
15.305	98.6641	Transition Zone	0.344985	herm	syp2het	2022_08_10_DLW208het_555syp1_488rad51_dapi_herm2_stitched
20.6183	119.282	Transition Zone	0.417078	herm	syp2het	2022_08_10_DLW208het_555syp1_488rad51_dapi_herm2_stitched
17.8794	137.162	Pachytene	0.479594	herm	syp2het	2022_08_10_DLW208het_555syp1_488rad51_dapi_herm2_stitched
44.5171	181.679	Pachytene	0.635251	herm	syp2het	2022_08_10_DLW208het_555syp1_488rad51_dapi_herm2_stitched
33.7214	215.4	Pachytene	0.75316	herm	syp2het	2022_08_10_DLW208het_555syp1_488rad51_dapi_herm2_stitched
23.9118	239.312	Pachytene	0.836769	herm	syp2het	2022_08_10_DLW208het_555syp1_488rad51_dapi_herm2_stitched
46.6833	285.996	Pachytene	1	herm	syp2het	2022_08_10_DLW208het_555syp1_488rad51_dapi_herm2_stitched
21.4028	21.4028	PMT	0.0822718	herm	syp2het	2022_08_10_DLW208het_555syp1_488rad51_dapi_herm3_stitched
13.005	34.4078	PMT	0.132263	herm	syp2het	2022_08_10_DLW208het_555syp1_488rad51_dapi_herm3_stitched
10.9599	45.3677	PMT	0.174392	herm	syp2het	2022_08_10_DLW208het_555syp1_488rad51_dapi_herm3_stitched
18.4049	63.7726	PMT	0.24514	herm	syp2het	2022_08_10_DLW208het_555syp1_488rad51_dapi_herm3_stitched
8.79722	72.5698	PMT	0.278957	herm	syp2het	2022_08_10_DLW208het_555syp1_488rad51_dapi_herm3_stitched
9.58341	82.1532	Transition Zone	0.315795	herm	syp2het	2022_08_10_DLW208het_555syp1_488rad51_dapi_herm3_stitched
13.7195	95.8727	Transition Zone	0.368533	herm	syp2het	2022_08_10_DLW208het_555syp1_488rad51_dapi_herm3_stitched
28.3553	124.228	Pachytene	0.47753	herm	syp2het	2022_08_10_DLW208het_555syp1_488rad51_dapi_herm3_stitched
34.9073	159.135	Pachytene	0.611713	herm	syp2het	2022_08_10_DLW208het_555syp1_488rad51_dapi_herm3_stitched
27.5934	186.729	Pachytene	0.717781	herm	syp2het	2022_08_10_DLW208het_555syp1_488rad51_dapi_herm3_stitched
31.5859	218.315	Pachytene	0.839197	herm	syp2het	2022_08_10_DLW208het_555syp1_488rad51_dapi_herm3_stitched
24.9524	243.267	Pachytene	0.935113	herm	syp2het	2022_08_10_DLW208het_555syp1_488rad51_dapi_herm3_stitched
16.8801	260.147	Pachytene	1	herm	syp2het	2022_08_10_DLW208het_555syp1_488rad51_dapi_herm3_stitched
27.2429	27.2429	PMT	0.0709776	herm	syp2het	2022_08_10_DLW208het_555syp1_488rad51_dapi_herm4_stitched
36.0567	63.2996	PMT	0.164918	herm	syp2het	2022_08_10_DLW208het_555syp1_488rad51_dapi_herm4_stitched
8.75621	72.0558	PMT	0.187731	herm	syp2het	2022_08_10_DLW208het_555syp1_488rad51_dapi_herm4_stitched
17.4045	89.4603	Transition Zone	0.233076	herm	syp2het	2022_08_10_DLW208het_555syp1_488rad51_dapi_herm4_stitched
28.2671	117.727	Transition Zone	0.306722	herm	syp2het	2022_08_10_DLW208het_555syp1_488rad51_dapi_herm4_stitched
31.3865	149.114	Transition Zone	0.388495	herm	syp2het	2022_08_10_DLW208het_555syp1_488rad51_dapi_herm4_stitched
20.3333	169.447	Transition Zone	0.441471	herm	syp2het	2022_08_10_DLW208het_555syp1_488rad51_dapi_herm4_stitched
23.9278	193.375	Pachytene	0.503811	herm	syp2het	2022_08_10_DLW208het_555syp1_488rad51_dapi_herm4_stitched
37.953	231.328	Pachytene	0.602693	herm	syp2het	2022_08_10_DLW208het_555syp1_488rad51_dapi_herm4_stitched
33.6171	264.945	Pachytene	0.690277	herm	syp2het	2022_08_10_DLW208het_555syp1_488rad51_dapi_herm4_stitched
74.0136	338.959	Pachytene	0.883109	herm	syp2het	2022_08_10_DLW208het_555syp1_488rad51_dapi_herm4_stitched
44.8655	383.824	Pachytene	1	herm	syp2het	2022_08_10_DLW208het_555syp1_488rad51_dapi_herm4_stitched
28.8036	28.8036	PMT	0.0669934	herm	syp2het	2022_08_10_DLW208het_555syp1_488rad51_dapi_herm5_stitched
34.5119	63.3155	PMT	0.147263	herm	syp2het	2022_08_10_DLW208het_555syp1_488rad51_dapi_herm5_stitched
21.2772	84.5926	PMT	0.196751	herm	syp2het	2022_08_10_DLW208het_555syp1_488rad51_dapi_herm5_stitched
4.76343	89.3561	Transition Zone	0.20783	herm	syp2het	2022_08_10_DLW208het_555syp1_488rad51_dapi_herm5_stitched
13.7531	103.109	Transition Zone	0.239818	herm	syp2het	2022_08_10_DLW208het_555syp1_488rad51_dapi_herm5_stitched
17.4676	120.577	Transition Zone	0.280446	herm	syp2het	2022_08_10_DLW208het_555syp1_488rad51_dapi_herm5_stitched
22.1311	142.708	Transition Zone	0.33192	herm	syp2het	2022_08_10_DLW208het_555syp1_488rad51_dapi_herm5_stitched
30.5138	173.222	Transition Zone	0.402891	herm	syp2het	2022_08_10_DLW208het_555syp1_488rad51_dapi_herm5_stitched
29.5061	202.728	Pachytene	0.471518	herm	syp2het	2022_08_10_DLW208het_555syp1_488rad51_dapi_herm5_stitched
30.3036	233.031	Pachytene	0.542	herm	syp2het	2022_08_10_DLW208het_555syp1_488rad51_dapi_herm5_stitched
25.3687	258.4	Pachytene	0.601005	herm	syp2het	2022_08_10_DLW208het_555syp1_488rad51_dapi_herm5_stitched
15.6051	274.005	Pachytene	0.6373	herm	syp2het	2022_08_10_DLW208het_555syp1_488rad51_dapi_herm5_stitched
14.1675	288.173	Pachytene	0.670252	herm	syp2het	2022_08_10_DLW208het_555syp1_488rad51_dapi_herm5_stitched
22.9847	311.157	Pachytene	0.723711	herm	syp2het	2022_08_10_DLW208het_555syp1_488rad51_dapi_herm5_stitched
18.3814	329.539	Pachytene	0.766464	herm	syp2het	2022_08_10_DLW208het_555syp1_488rad51_dapi_herm5_stitched
21.1766	350.715	Pachytene	0.815718	herm	syp2het	2022_08_10_DLW208het_555syp1_488rad51_dapi_herm5_stitched
12.9421	363.658	Pachytene	0.84582	herm	syp2het	2022_08_10_DLW208het_555syp1_488rad51_dapi_herm5_stitched
20.8457	384.503	Pachytene	0.894304	herm	syp2het	2022_08_10_DLW208het_555syp1_488rad51_dapi_herm5_stitched
17.2203	401.724	Pachytene	0.934356	herm	syp2het	2022_08_10_DLW208het_555syp1_488rad51_dapi_herm5_stitched
28.2233	429.947	Pachytene	1	herm	syp2het	2022_08_10_DLW208het_555syp1_488rad51_dapi_herm5_stitched
37.9462	37.9462	PMT	0.0981969	herm	syp2het	2022_08_10_DLW208het_555syp1_488rad51_dapi_herm6_stitched
38.0672	76.0135	PMT	0.196707	herm	syp2het	2022_08_10_DLW208het_555syp1_488rad51_dapi_herm6_stitched
9.87235	85.8858	PMT	0.222254	herm	syp2het	2022_08_10_DLW208het_555syp1_488rad51_dapi_herm6_stitched
6.7528	92.6386	Transition Zone	0.239729	herm	syp2het	2022_08_10_DLW208het_555syp1_488rad51_dapi_herm6_stitched
9.58624	102.225	Transition Zone	0.264536	herm	syp2het	2022_08_10_DLW208het_555syp1_488rad51_dapi_herm6_stitched
9.13627	111.361	Transition Zone	0.288179	herm	syp2het	2022_08_10_DLW208het_555syp1_488rad51_dapi_herm6_stitched
31.2154	142.577	Transition Zone	0.368958	herm	syp2het	2022_08_10_DLW208het_555syp1_488rad51_dapi_herm6_stitched
19.0293	161.606	Transition Zone	0.418202	herm	syp2het	2022_08_10_DLW208het_555syp1_488rad51_dapi_herm6_stitched
25.7847	187.39	Pachytene	0.484927	herm	syp2het	2022_08_10_DLW208het_555syp1_488rad51_dapi_herm6_stitched
40.4079	227.798	Pachytene	0.589494	herm	syp2het	2022_08_10_DLW208het_555syp1_488rad51_dapi_herm6_stitched
27.4106	255.209	Pachytene	0.660427	herm	syp2het	2022_08_10_DLW208het_555syp1_488rad51_dapi_herm6_stitched
32.1451	287.354	Pachytene	0.743612	herm	syp2het	2022_08_10_DLW208het_555syp1_488rad51_dapi_herm6_stitched
42.7139	330.068	Pachytene	0.854147	herm	syp2het	2022_08_10_DLW208het_555syp1_488rad51_dapi_herm6_stitched
41.0805	371.148	Pachytene	0.960454	herm	syp2het	2022_08_10_DLW208het_555syp1_488rad51_dapi_herm6_stitched
10.1973	381.346	Pachytene	0.986843	herm	syp2het	2022_08_10_DLW208het_555syp1_488rad51_dapi_herm6_stitched
5.08439	386.43	Pachytene	1	herm	syp2het	2022_08_10_DLW208het_555syp1_488rad51_dapi_herm6_stitched
41.1645	41.1645	PMT	0.113659	herm	syp2het	2022_08_10_DLW208het_555syp1_488rad51_dapi_herm7_stitched
27.0512	68.2157	PMT	0.18835	herm	syp2het	2022_08_10_DLW208het_555syp1_488rad51_dapi_herm7_stitched
10.0029	78.2186	PMT	0.215969	herm	syp2het	2022_08_10_DLW208het_555syp1_488rad51_dapi_herm7_stitched
4.58704	82.8056	Transition Zone	0.228634	herm	syp2het	2022_08_10_DLW208het_555syp1_488rad51_dapi_herm7_stitched
48.4384	131.244	Transition Zone	0.362377	herm	syp2het	2022_08_10_DLW208het_555syp1_488rad51_dapi_herm7_stitched
20.0418	151.286	Pachytene	0.417714	herm	syp2het	2022_08_10_DLW208het_555syp1_488rad51_dapi_herm7_stitched
24.6124	175.898	Pachytene	0.485671	herm	syp2het	2022_08_10_DLW208het_555syp1_488rad51_dapi_herm7_stitched
8.67216	184.57	Pachytene	0.509616	herm	syp2het	2022_08_10_DLW208het_555syp1_488rad51_dapi_herm7_stitched
11.431	196.001	Pachytene	0.541178	herm	syp2het	2022_08_10_DLW208het_555syp1_488rad51_dapi_herm7_stitched
13.5996	209.601	Pachytene	0.578728	herm	syp2het	2022_08_10_DLW208het_555syp1_488rad51_dapi_herm7_stitched
21.1298	230.731	Pachytene	0.637069	herm	syp2het	2022_08_10_DLW208het_555syp1_488rad51_dapi_herm7_stitched
19.6903	250.421	Pachytene	0.691436	herm	syp2het	2022_08_10_DLW208het_555syp1_488rad51_dapi_herm7_stitched
18.6149	269.036	Pachytene	0.742834	herm	syp2het	2022_08_10_DLW208het_555syp1_488rad51_dapi_herm7_stitched
26.6206	295.657	Pachytene	0.816336	herm	syp2het	2022_08_10_DLW208het_555syp1_488rad51_dapi_herm7_stitched
27.8722	323.529	Pachytene	0.893293	herm	syp2het	2022_08_10_DLW208het_555syp1_488rad51_dapi_herm7_stitched
38.6465	362.175	Pachytene	1	herm	syp2het	2022_08_10_DLW208het_555syp1_488rad51_dapi_herm7_stitched
51.1156	51.1156	PMT	0.161932	male	syp2het	2022_08_10_DLW208het_555syp1_488rad51_dapi_male2_stitched
34.1327	85.2483	PMT	0.270063	male	syp2het	2022_08_10_DLW208het_555syp1_488rad51_dapi_male2_stitched
8.24263	93.4909	PMT	0.296176	male	syp2het	2022_08_10_DLW208het_555syp1_488rad51_dapi_male2_stitched
7.7477	101.239	Transition Zone	0.32072	male	syp2het	2022_08_10_DLW208het_555syp1_488rad51_dapi_male2_stitched
23.2471	124.486	Transition Zone	0.394366	male	syp2het	2022_08_10_DLW208het_555syp1_488rad51_dapi_male2_stitched
8.21294	132.699	Transition Zone	0.420384	male	syp2het	2022_08_10_DLW208het_555syp1_488rad51_dapi_male2_stitched
21.533	154.232	Pachytene	0.4886	male	syp2het	2022_08_10_DLW208het_555syp1_488rad51_dapi_male2_stitched
11.2135	165.445	Pachytene	0.524124	male	syp2het	2022_08_10_DLW208het_555syp1_488rad51_dapi_male2_stitched
11.889	177.334	Pachytene	0.561787	male	syp2het	2022_08_10_DLW208het_555syp1_488rad51_dapi_male2_stitched
13.2134	190.547	Pachytene	0.603647	male	syp2het	2022_08_10_DLW208het_555syp1_488rad51_dapi_male2_stitched
6.17087	196.718	Pachytene	0.623196	male	syp2het	2022_08_10_DLW208het_555syp1_488rad51_dapi_male2_stitched
7.08808	203.806	Pachytene	0.645651	male	syp2het	2022_08_10_DLW208het_555syp1_488rad51_dapi_male2_stitched
15.6763	219.483	Pachytene	0.695313	male	syp2het	2022_08_10_DLW208het_555syp1_488rad51_dapi_male2_stitched
25.3876	244.87	Pachytene	0.77574	male	syp2het	2022_08_10_DLW208het_555syp1_488rad51_dapi_male2_stitched
28.9592	273.829	Pachytene	0.867481	male	syp2het	2022_08_10_DLW208het_555syp1_488rad51_dapi_male2_stitched
41.8309	315.66	Pachytene	1	male	syp2het	2022_08_10_DLW208het_555syp1_488rad51_dapi_male2_stitched
45.4653	45.4653	PMT	0.132987	male	syp2het	2022_08_10_DLW208het_555syp1_488rad51_dapi_male3_stitched
42.4409	87.9063	PMT	0.257127	male	syp2het	2022_08_10_DLW208het_555syp1_488rad51_dapi_male3_stitched
22.4501	110.356	PMT	0.322794	male	syp2het	2022_08_10_DLW208het_555syp1_488rad51_dapi_male3_stitched
12.5729	122.929	Transition Zone	0.359569	male	syp2het	2022_08_10_DLW208het_555syp1_488rad51_dapi_male3_stitched
23.8442	146.774	Transition Zone	0.429314	male	syp2het	2022_08_10_DLW208het_555syp1_488rad51_dapi_male3_stitched
25.7433	172.517	Transition Zone	0.504613	male	syp2het	2022_08_10_DLW208het_555syp1_488rad51_dapi_male3_stitched
16.266	188.783	Pachytene	0.552191	male	syp2het	2022_08_10_DLW208het_555syp1_488rad51_dapi_male3_stitched
22.2612	211.044	Pachytene	0.617306	male	syp2het	2022_08_10_DLW208het_555syp1_488rad51_dapi_male3_stitched
17.0192	228.063	Pachytene	0.667087	male	syp2het	2022_08_10_DLW208het_555syp1_488rad51_dapi_male3_stitched
30.4923	258.556	Pachytene	0.756277	male	syp2het	2022_08_10_DLW208het_555syp1_488rad51_dapi_male3_stitched
44.792	303.348	Pachytene	0.887294	male	syp2het	2022_08_10_DLW208het_555syp1_488rad51_dapi_male3_stitched
38.5317	341.879	Pachytene	1	male	syp2het	2022_08_10_DLW208het_555syp1_488rad51_dapi_male3_stitched
46.2619	46.2619	PMT	0.131316	male	syp2het	2022_08_10_DLW208het_555syp1_488rad51_dapi_male4_stitched
52.0076	98.2695	PMT	0.278941	male	syp2het	2022_08_10_DLW208het_555syp1_488rad51_dapi_male4_stitched
7.1046	105.374	PMT	0.299108	male	syp2het	2022_08_10_DLW208het_555syp1_488rad51_dapi_male4_stitched
11.3793	116.753	Transition Zone	0.331408	male	syp2het	2022_08_10_DLW208het_555syp1_488rad51_dapi_male4_stitched
22.3682	139.122	Transition Zone	0.394901	male	syp2het	2022_08_10_DLW208het_555syp1_488rad51_dapi_male4_stitched
14.39	153.512	Transition Zone	0.435747	male	syp2het	2022_08_10_DLW208het_555syp1_488rad51_dapi_male4_stitched
12.8794	166.391	Pachytene	0.472306	male	syp2het	2022_08_10_DLW208het_555syp1_488rad51_dapi_male4_stitched
13.8053	180.196	Pachytene	0.511492	male	syp2het	2022_08_10_DLW208het_555syp1_488rad51_dapi_male4_stitched
13.1304	193.327	Pachytene	0.548763	male	syp2het	2022_08_10_DLW208het_555syp1_488rad51_dapi_male4_stitched
33.3046	226.631	Pachytene	0.6433	male	syp2het	2022_08_10_DLW208het_555syp1_488rad51_dapi_male4_stitched
84.6163	311.248	Pachytene	0.883486	male	syp2het	2022_08_10_DLW208het_555syp1_488rad51_dapi_male4_stitched
41.0475	352.295	Pachytene	1	male	syp2het	2022_08_10_DLW208het_555syp1_488rad51_dapi_male4_stitched
36.2915	36.2915	PMT	0.104476	male	syp2het	2022_08_10_DLW208het_555syp1_488rad51_dapi_male5_stitched
41.3625	77.654	PMT	0.22355	male	syp2het	2022_08_10_DLW208het_555syp1_488rad51_dapi_male5_stitched
11.6894	89.3434	PMT	0.257201	male	syp2het	2022_08_10_DLW208het_555syp1_488rad51_dapi_male5_stitched
9.27454	98.618	PMT	0.2839	male	syp2het	2022_08_10_DLW208het_555syp1_488rad51_dapi_male5_stitched
15.5689	114.187	Transition Zone	0.32872	male	syp2het	2022_08_10_DLW208het_555syp1_488rad51_dapi_male5_stitched
22.8384	137.025	Transition Zone	0.394467	male	syp2het	2022_08_10_DLW208het_555syp1_488rad51_dapi_male5_stitched
10.8767	147.902	Transition Zone	0.425779	male	syp2het	2022_08_10_DLW208het_555syp1_488rad51_dapi_male5_stitched
14.0109	161.913	Pachytene	0.466113	male	syp2het	2022_08_10_DLW208het_555syp1_488rad51_dapi_male5_stitched
16.3867	178.3	Pachytene	0.513287	male	syp2het	2022_08_10_DLW208het_555syp1_488rad51_dapi_male5_stitched
44.0232	222.323	Pachytene	0.64002	male	syp2het	2022_08_10_DLW208het_555syp1_488rad51_dapi_male5_stitched
39.5076	261.83	Pachytene	0.753755	male	syp2het	2022_08_10_DLW208het_555syp1_488rad51_dapi_male5_stitched
40.1341	301.965	Pachytene	0.869292	male	syp2het	2022_08_10_DLW208het_555syp1_488rad51_dapi_male5_stitched
45.4037	347.368	Pachytene	1	male	syp2het	2022_08_10_DLW208het_555syp1_488rad51_dapi_male5_stitched
36.1475	36.1475	PMT	0.100963	male	syp2het	2022_08_10_DLW208het_555syp1_488rad51_dapi_male6_stitched
15.3747	51.5222	PMT	0.143907	male	syp2het	2022_08_10_DLW208het_555syp1_488rad51_dapi_male6_stitched
28.8659	80.3881	PMT	0.224532	male	syp2het	2022_08_10_DLW208het_555syp1_488rad51_dapi_male6_stitched
15.3611	95.7493	PMT	0.267437	male	syp2het	2022_08_10_DLW208het_555syp1_488rad51_dapi_male6_stitched
8.11707	103.866	Transition Zone	0.290109	male	syp2het	2022_08_10_DLW208het_555syp1_488rad51_dapi_male6_stitched
13.1238	116.99	Transition Zone	0.326765	male	syp2het	2022_08_10_DLW208het_555syp1_488rad51_dapi_male6_stitched
15.3472	132.337	Transition Zone	0.369631	male	syp2het	2022_08_10_DLW208het_555syp1_488rad51_dapi_male6_stitched
28.2884	160.626	Pachytene	0.448643	male	syp2het	2022_08_10_DLW208het_555syp1_488rad51_dapi_male6_stitched
20.6805	181.306	Pachytene	0.506406	male	syp2het	2022_08_10_DLW208het_555syp1_488rad51_dapi_male6_stitched
22.396	203.702	Pachytene	0.56896	male	syp2het	2022_08_10_DLW208het_555syp1_488rad51_dapi_male6_stitched
8.38468	212.087	Pachytene	0.592379	male	syp2het	2022_08_10_DLW208het_555syp1_488rad51_dapi_male6_stitched
11.913	224	Pachytene	0.625654	male	syp2het	2022_08_10_DLW208het_555syp1_488rad51_dapi_male6_stitched
11.0365	235.036	Pachytene	0.65648	male	syp2het	2022_08_10_DLW208het_555syp1_488rad51_dapi_male6_stitched
48.7615	283.798	Pachytene	0.792675	male	syp2het	2022_08_10_DLW208het_555syp1_488rad51_dapi_male6_stitched
26.3844	310.182	Pachytene	0.866369	male	syp2het	2022_08_10_DLW208het_555syp1_488rad51_dapi_male6_stitched
15.3745	325.557	Pachytene	0.909312	male	syp2het	2022_08_10_DLW208het_555syp1_488rad51_dapi_male6_stitched
13.0832	338.64	Pachytene	0.945854	male	syp2het	2022_08_10_DLW208het_555syp1_488rad51_dapi_male6_stitched
19.3855	358.025	Pachytene	1	male	syp2het	2022_08_10_DLW208het_555syp1_488rad51_dapi_male6_stitched
30.1645	30.1645	PMT	0.0950642	herm	syp3het	2022_08_10_DLW209het_555syp1_488rad51_dapi_herm1_stitched
25.1534	55.3179	PMT	0.174336	herm	syp3het	2022_08_10_DLW209het_555syp1_488rad51_dapi_herm1_stitched
19.394	74.7118	PMT	0.235456	herm	syp3het	2022_08_10_DLW209het_555syp1_488rad51_dapi_herm1_stitched
21.8889	96.6007	PMT	0.30444	herm	syp3het	2022_08_10_DLW209het_555syp1_488rad51_dapi_herm1_stitched
11.2248	107.826	PMT	0.339815	herm	syp3het	2022_08_10_DLW209het_555syp1_488rad51_dapi_herm1_stitched
10.3676	118.193	Transition Zone	0.372489	herm	syp3het	2022_08_10_DLW209het_555syp1_488rad51_dapi_herm1_stitched
35.9471	154.14	Transition Zone	0.485777	herm	syp3het	2022_08_10_DLW209het_555syp1_488rad51_dapi_herm1_stitched
18.5416	172.682	Transition Zone	0.544211	herm	syp3het	2022_08_10_DLW209het_555syp1_488rad51_dapi_herm1_stitched
49.7401	222.422	Pachytene	0.700969	herm	syp3het	2022_08_10_DLW209het_555syp1_488rad51_dapi_herm1_stitched
54.2182	276.64	Pachytene	0.871839	herm	syp3het	2022_08_10_DLW209het_555syp1_488rad51_dapi_herm1_stitched
25.2095	301.85	Pachytene	0.951287	herm	syp3het	2022_08_10_DLW209het_555syp1_488rad51_dapi_herm1_stitched
15.4569	317.306	Pachytene	1	herm	syp3het	2022_08_10_DLW209het_555syp1_488rad51_dapi_herm1_stitched
37.9903	37.9903	PMT	0.118182	herm	syp3het	2022_08_10_DLW209het_555syp1_488rad51_dapi_herm2_stitched
13.4017	51.392	PMT	0.159873	herm	syp3het	2022_08_10_DLW209het_555syp1_488rad51_dapi_herm2_stitched
20.953	72.345	PMT	0.225055	herm	syp3het	2022_08_10_DLW209het_555syp1_488rad51_dapi_herm2_stitched
10.8213	83.1663	PMT	0.258718	herm	syp3het	2022_08_10_DLW209het_555syp1_488rad51_dapi_herm2_stitched
12.1376	95.3038	PMT	0.296476	herm	syp3het	2022_08_10_DLW209het_555syp1_488rad51_dapi_herm2_stitched
11.5896	106.893	Transition Zone	0.33253	herm	syp3het	2022_08_10_DLW209het_555syp1_488rad51_dapi_herm2_stitched
17.1524	124.046	Transition Zone	0.385888	herm	syp3het	2022_08_10_DLW209het_555syp1_488rad51_dapi_herm2_stitched
16.9588	141.005	Transition Zone	0.438645	herm	syp3het	2022_08_10_DLW209het_555syp1_488rad51_dapi_herm2_stitched
50.0588	191.063	Pachytene	0.59437	herm	syp3het	2022_08_10_DLW209het_555syp1_488rad51_dapi_herm2_stitched
48.444	239.507	Pachytene	0.745073	herm	syp3het	2022_08_10_DLW209het_555syp1_488rad51_dapi_herm2_stitched
81.9477	321.455	Pachytene	1	herm	syp3het	2022_08_10_DLW209het_555syp1_488rad51_dapi_herm2_stitched
32.7545	32.7545	PMT	0.0904166	herm	syp3het	2022_08_10_DLW209het_555syp1_488rad51_dapi_herm3_stitched
41.796	74.5506	PMT	0.205792	herm	syp3het	2022_08_10_DLW209het_555syp1_488rad51_dapi_herm3_stitched
13.843	88.3936	PMT	0.244004	herm	syp3het	2022_08_10_DLW209het_555syp1_488rad51_dapi_herm3_stitched
9.21777	97.6113	Transition Zone	0.269449	herm	syp3het	2022_08_10_DLW209het_555syp1_488rad51_dapi_herm3_stitched
31.9054	129.517	Transition Zone	0.357522	herm	syp3het	2022_08_10_DLW209het_555syp1_488rad51_dapi_herm3_stitched
11.9764	141.493	Transition Zone	0.390582	herm	syp3het	2022_08_10_DLW209het_555syp1_488rad51_dapi_herm3_stitched
64.1489	205.642	Pachytene	0.567661	herm	syp3het	2022_08_10_DLW209het_555syp1_488rad51_dapi_herm3_stitched
35.7813	241.423	Pachytene	0.666432	herm	syp3het	2022_08_10_DLW209het_555syp1_488rad51_dapi_herm3_stitched
30.6547	272.078	Pachytene	0.751053	herm	syp3het	2022_08_10_DLW209het_555syp1_488rad51_dapi_herm3_stitched
35.1925	307.27	Pachytene	0.848199	herm	syp3het	2022_08_10_DLW209het_555syp1_488rad51_dapi_herm3_stitched
54.9918	362.262	Pachytene	1	herm	syp3het	2022_08_10_DLW209het_555syp1_488rad51_dapi_herm3_stitched
37.3979	37.3979	PMT	0.0999471	herm	syp3het	2022_08_10_DLW209het_555syp1_488rad51_dapi_herm4_stitched
11.2972	48.6951	PMT	0.130139	herm	syp3het	2022_08_10_DLW209het_555syp1_488rad51_dapi_herm4_stitched
15.5191	64.2143	PMT	0.171615	herm	syp3het	2022_08_10_DLW209het_555syp1_488rad51_dapi_herm4_stitched
7.8529	72.0672	Transition Zone	0.192602	herm	syp3het	2022_08_10_DLW209het_555syp1_488rad51_dapi_herm4_stitched
9.54609	81.6133	Transition Zone	0.218114	herm	syp3het	2022_08_10_DLW209het_555syp1_488rad51_dapi_herm4_stitched
12.5399	94.1531	Transition Zone	0.251627	herm	syp3het	2022_08_10_DLW209het_555syp1_488rad51_dapi_herm4_stitched
11.8265	105.98	Transition Zone	0.283234	herm	syp3het	2022_08_10_DLW209het_555syp1_488rad51_dapi_herm4_stitched
15.56	121.54	Transition Zone	0.324818	herm	syp3het	2022_08_10_DLW209het_555syp1_488rad51_dapi_herm4_stitched
30.7314	152.271	Pachytene	0.406949	herm	syp3het	2022_08_10_DLW209het_555syp1_488rad51_dapi_herm4_stitched
25.2495	177.52	Pachytene	0.474429	herm	syp3het	2022_08_10_DLW209het_555syp1_488rad51_dapi_herm4_stitched
42.8842	220.405	Pachytene	0.589038	herm	syp3het	2022_08_10_DLW209het_555syp1_488rad51_dapi_herm4_stitched
34.5657	254.97	Pachytene	0.681416	herm	syp3het	2022_08_10_DLW209het_555syp1_488rad51_dapi_herm4_stitched
52.7541	307.724	Pachytene	0.822403	herm	syp3het	2022_08_10_DLW209het_555syp1_488rad51_dapi_herm4_stitched
28.2793	336.004	Pachytene	0.89798	herm	syp3het	2022_08_10_DLW209het_555syp1_488rad51_dapi_herm4_stitched
20.4109	356.415	Pachytene	0.952529	herm	syp3het	2022_08_10_DLW209het_555syp1_488rad51_dapi_herm4_stitched
17.7626	374.177	Pachytene	1	herm	syp3het	2022_08_10_DLW209het_555syp1_488rad51_dapi_herm4_stitched
23.7671	23.7671	PMT	0.0734547	herm	syp3het	2022_08_10_DLW209het_555syp1_488rad51_dapi_herm5_stitched
9.57064	33.3377	PMT	0.103034	herm	syp3het	2022_08_10_DLW209het_555syp1_488rad51_dapi_herm5_stitched
14.3755	47.7132	PMT	0.147463	herm	syp3het	2022_08_10_DLW209het_555syp1_488rad51_dapi_herm5_stitched
10.474	58.1872	PMT	0.179834	herm	syp3het	2022_08_10_DLW209het_555syp1_488rad51_dapi_herm5_stitched
17.7015	75.8887	PMT	0.234542	herm	syp3het	2022_08_10_DLW209het_555syp1_488rad51_dapi_herm5_stitched
12.5377	88.4264	PMT	0.273291	herm	syp3het	2022_08_10_DLW209het_555syp1_488rad51_dapi_herm5_stitched
12.8755	101.302	Transition Zone	0.313085	herm	syp3het	2022_08_10_DLW209het_555syp1_488rad51_dapi_herm5_stitched
22.3925	123.694	Transition Zone	0.382291	herm	syp3het	2022_08_10_DLW209het_555syp1_488rad51_dapi_herm5_stitched
23.7069	147.401	Transition Zone	0.45556	herm	syp3het	2022_08_10_DLW209het_555syp1_488rad51_dapi_herm5_stitched
69.525	216.926	Pachytene	0.670434	herm	syp3het	2022_08_10_DLW209het_555syp1_488rad51_dapi_herm5_stitched
68.4978	285.424	Pachytene	0.882134	herm	syp3het	2022_08_10_DLW209het_555syp1_488rad51_dapi_herm5_stitched
38.1367	323.561	Pachytene	1	herm	syp3het	2022_08_10_DLW209het_555syp1_488rad51_dapi_herm5_stitched
17.6428	17.6428	PMT	0.0536536	herm	syp3het	2022_08_10_DLW209het_555syp1_488rad51_dapi_herm6_stitched
18.0128	35.6557	PMT	0.108432	herm	syp3het	2022_08_10_DLW209het_555syp1_488rad51_dapi_herm6_stitched
29.6645	65.3201	PMT	0.198645	herm	syp3het	2022_08_10_DLW209het_555syp1_488rad51_dapi_herm6_stitched
10.3468	75.667	PMT	0.230111	herm	syp3het	2022_08_10_DLW209het_555syp1_488rad51_dapi_herm6_stitched
5.99571	81.6627	Transition Zone	0.248344	herm	syp3het	2022_08_10_DLW209het_555syp1_488rad51_dapi_herm6_stitched
32.533	114.196	Transition Zone	0.34728	herm	syp3het	2022_08_10_DLW209het_555syp1_488rad51_dapi_herm6_stitched
12.9027	127.098	Transition Zone	0.386519	herm	syp3het	2022_08_10_DLW209het_555syp1_488rad51_dapi_herm6_stitched
45.2463	172.345	Pachytene	0.524117	herm	syp3het	2022_08_10_DLW209het_555syp1_488rad51_dapi_herm6_stitched
24.0605	196.405	Pachytene	0.597288	herm	syp3het	2022_08_10_DLW209het_555syp1_488rad51_dapi_herm6_stitched
40.9146	237.32	Pachytene	0.721713	herm	syp3het	2022_08_10_DLW209het_555syp1_488rad51_dapi_herm6_stitched
45.9285	283.248	Pachytene	0.861386	herm	syp3het	2022_08_10_DLW209het_555syp1_488rad51_dapi_herm6_stitched
45.5803	328.829	Pachytene	1	herm	syp3het	2022_08_10_DLW209het_555syp1_488rad51_dapi_herm6_stitched
54.1486	54.1486	PMT	0.162573	male	syp3het	2022_08_10_DLW209het_555syp1_488rad51_dapi_male1_stitched
34.6126	88.7611	PMT	0.266491	male	syp3het	2022_08_10_DLW209het_555syp1_488rad51_dapi_male1_stitched
14.3393	103.1	PMT	0.309543	male	syp3het	2022_08_10_DLW209het_555syp1_488rad51_dapi_male1_stitched
10.4886	113.589	Transition Zone	0.341033	male	syp3het	2022_08_10_DLW209het_555syp1_488rad51_dapi_male1_stitched
23.3909	136.98	Transition Zone	0.411261	male	syp3het	2022_08_10_DLW209het_555syp1_488rad51_dapi_male1_stitched
6.86526	143.845	Transition Zone	0.431873	male	syp3het	2022_08_10_DLW209het_555syp1_488rad51_dapi_male1_stitched
32.6973	176.542	Pachytene	0.530041	male	syp3het	2022_08_10_DLW209het_555syp1_488rad51_dapi_male1_stitched
15.4937	192.036	Pachytene	0.576559	male	syp3het	2022_08_10_DLW209het_555syp1_488rad51_dapi_male1_stitched
17.1109	209.147	Pachytene	0.627932	male	syp3het	2022_08_10_DLW209het_555syp1_488rad51_dapi_male1_stitched
13.587	222.734	Pachytene	0.668725	male	syp3het	2022_08_10_DLW209het_555syp1_488rad51_dapi_male1_stitched
11.9618	234.696	Pachytene	0.704638	male	syp3het	2022_08_10_DLW209het_555syp1_488rad51_dapi_male1_stitched
17.8595	252.556	Pachytene	0.758259	male	syp3het	2022_08_10_DLW209het_555syp1_488rad51_dapi_male1_stitched
34.7808	287.336	Pachytene	0.862683	male	syp3het	2022_08_10_DLW209het_555syp1_488rad51_dapi_male1_stitched
45.7367	333.073	Pachytene	1	male	syp3het	2022_08_10_DLW209het_555syp1_488rad51_dapi_male1_stitched
50.3487	50.3487	PMT	0.140104	male	syp3het	2022_08_10_DLW209het_555syp1_488rad51_dapi_male3_stitched
20.7856	71.1343	PMT	0.197944	male	syp3het	2022_08_10_DLW209het_555syp1_488rad51_dapi_male3_stitched
28.2894	99.4237	PMT	0.276664	male	syp3het	2022_08_10_DLW209het_555syp1_488rad51_dapi_male3_stitched
7.71604	107.14	PMT	0.298135	male	syp3het	2022_08_10_DLW209het_555syp1_488rad51_dapi_male3_stitched
12.1495	119.289	PMT	0.331944	male	syp3het	2022_08_10_DLW209het_555syp1_488rad51_dapi_male3_stitched
7.83651	127.126	Transition Zone	0.35375	male	syp3het	2022_08_10_DLW209het_555syp1_488rad51_dapi_male3_stitched
22.4051	149.531	Transition Zone	0.416096	male	syp3het	2022_08_10_DLW209het_555syp1_488rad51_dapi_male3_stitched
15.7014	165.232	Transition Zone	0.459788	male	syp3het	2022_08_10_DLW209het_555syp1_488rad51_dapi_male3_stitched
10.726	175.958	Pachytene	0.489635	male	syp3het	2022_08_10_DLW209het_555syp1_488rad51_dapi_male3_stitched
22.8498	198.808	Pachytene	0.553219	male	syp3het	2022_08_10_DLW209het_555syp1_488rad51_dapi_male3_stitched
22.582	221.39	Pachytene	0.616057	male	syp3het	2022_08_10_DLW209het_555syp1_488rad51_dapi_male3_stitched
28.1286	249.519	Pachytene	0.69433	male	syp3het	2022_08_10_DLW209het_555syp1_488rad51_dapi_male3_stitched
57.9305	307.449	Pachytene	0.855532	male	syp3het	2022_08_10_DLW209het_555syp1_488rad51_dapi_male3_stitched
51.9168	359.366	Pachytene	1	male	syp3het	2022_08_10_DLW209het_555syp1_488rad51_dapi_male3_stitched
50.9477	50.9477	PMT	0.152849	male	syp3het	2022_08_10_DLW209het_555syp1_488rad51_dapi_male4_stitched
36.4982	87.4458	PMT	0.262348	male	syp3het	2022_08_10_DLW209het_555syp1_488rad51_dapi_male4_stitched
21.4926	108.938	PMT	0.326828	male	syp3het	2022_08_10_DLW209het_555syp1_488rad51_dapi_male4_stitched
12.9429	121.881	Transition Zone	0.365659	male	syp3het	2022_08_10_DLW209het_555syp1_488rad51_dapi_male4_stitched
19.4002	141.282	Transition Zone	0.423862	male	syp3het	2022_08_10_DLW209het_555syp1_488rad51_dapi_male4_stitched
9.61512	150.897	Transition Zone	0.452708	male	syp3het	2022_08_10_DLW209het_555syp1_488rad51_dapi_male4_stitched
10.2354	161.132	Transition Zone	0.483415	male	syp3het	2022_08_10_DLW209het_555syp1_488rad51_dapi_male4_stitched
21.5561	182.688	Pachytene	0.548086	male	syp3het	2022_08_10_DLW209het_555syp1_488rad51_dapi_male4_stitched
14.435	197.123	Pachytene	0.591393	male	syp3het	2022_08_10_DLW209het_555syp1_488rad51_dapi_male4_stitched
16.5901	213.713	Pachytene	0.641165	male	syp3het	2022_08_10_DLW209het_555syp1_488rad51_dapi_male4_stitched
35.1988	248.912	Pachytene	0.746766	male	syp3het	2022_08_10_DLW209het_555syp1_488rad51_dapi_male4_stitched
41.8331	290.745	Pachytene	0.87227	male	syp3het	2022_08_10_DLW209het_555syp1_488rad51_dapi_male4_stitched
42.5749	333.32	Pachytene	1	male	syp3het	2022_08_10_DLW209het_555syp1_488rad51_dapi_male4_stitched
48.8532	48.8532	PMT	0.114314	male	syp3het	2022_08_10_DLW209het_555syp1_488rad51_dapi_male5_stitched
37.217	86.0701	PMT	0.2014	male	syp3het	2022_08_10_DLW209het_555syp1_488rad51_dapi_male5_stitched
28.63	114.7	PMT	0.268393	male	syp3het	2022_08_10_DLW209het_555syp1_488rad51_dapi_male5_stitched
8.21702	122.917	Transition Zone	0.28762	male	syp3het	2022_08_10_DLW209het_555syp1_488rad51_dapi_male5_stitched
14.1085	137.026	Transition Zone	0.320633	male	syp3het	2022_08_10_DLW209het_555syp1_488rad51_dapi_male5_stitched
17.5131	154.539	Transition Zone	0.361613	male	syp3het	2022_08_10_DLW209het_555syp1_488rad51_dapi_male5_stitched
13.3661	167.905	Transition Zone	0.392889	male	syp3het	2022_08_10_DLW209het_555syp1_488rad51_dapi_male5_stitched
40.3906	208.295	Pachytene	0.487401	male	syp3het	2022_08_10_DLW209het_555syp1_488rad51_dapi_male5_stitched
31.503	239.798	Pachytene	0.561117	male	syp3het	2022_08_10_DLW209het_555syp1_488rad51_dapi_male5_stitched
11.5717	251.37	Pachytene	0.588194	male	syp3het	2022_08_10_DLW209het_555syp1_488rad51_dapi_male5_stitched
12.4536	263.824	Pachytene	0.617335	male	syp3het	2022_08_10_DLW209het_555syp1_488rad51_dapi_male5_stitched
6.809	270.633	Pachytene	0.633268	male	syp3het	2022_08_10_DLW209het_555syp1_488rad51_dapi_male5_stitched
9.95967	280.592	Pachytene	0.656573	male	syp3het	2022_08_10_DLW209het_555syp1_488rad51_dapi_male5_stitched
32.3493	312.942	Pachytene	0.732268	male	syp3het	2022_08_10_DLW209het_555syp1_488rad51_dapi_male5_stitched
47.1163	360.058	Pachytene	0.842518	male	syp3het	2022_08_10_DLW209het_555syp1_488rad51_dapi_male5_stitched
54.5589	414.617	Pachytene	0.970183	male	syp3het	2022_08_10_DLW209het_555syp1_488rad51_dapi_male5_stitched
12.7424	427.359	Pachytene	1	male	syp3het	2022_08_10_DLW209het_555syp1_488rad51_dapi_male5_stitched
45.2735	45.2735	PMT	0.114717	male	syp3het	2022_08_10_DLW209het_555syp1_488rad51_dapi_male6_stitched
33.9852	79.2588	PMT	0.20083	male	syp3het	2022_08_10_DLW209het_555syp1_488rad51_dapi_male6_stitched
14.4759	93.7347	PMT	0.23751	male	syp3het	2022_08_10_DLW209het_555syp1_488rad51_dapi_male6_stitched
16.141	109.876	PMT	0.278409	male	syp3het	2022_08_10_DLW209het_555syp1_488rad51_dapi_male6_stitched
10.962	120.838	Transition Zone	0.306185	male	syp3het	2022_08_10_DLW209het_555syp1_488rad51_dapi_male6_stitched
27.7488	148.586	Transition Zone	0.376497	male	syp3het	2022_08_10_DLW209het_555syp1_488rad51_dapi_male6_stitched
7.72736	156.314	Transition Zone	0.396077	male	syp3het	2022_08_10_DLW209het_555syp1_488rad51_dapi_male6_stitched
9.45953	165.773	Transition Zone	0.420046	male	syp3het	2022_08_10_DLW209het_555syp1_488rad51_dapi_male6_stitched
32.7122	198.486	Pachytene	0.502934	male	syp3het	2022_08_10_DLW209het_555syp1_488rad51_dapi_male6_stitched
32.2541	230.74	Pachytene	0.584661	male	syp3het	2022_08_10_DLW209het_555syp1_488rad51_dapi_male6_stitched
26.1158	256.855	Pachytene	0.650835	male	syp3het	2022_08_10_DLW209het_555syp1_488rad51_dapi_male6_stitched
27.8078	284.663	Pachytene	0.721296	male	syp3het	2022_08_10_DLW209het_555syp1_488rad51_dapi_male6_stitched
59.3315	343.995	Pachytene	0.871633	male	syp3het	2022_08_10_DLW209het_555syp1_488rad51_dapi_male6_stitched
50.6607	394.655	Pachytene	1	male	syp3het	2022_08_10_DLW209het_555syp1_488rad51_dapi_male6_stitched
34.7404	34.7404	PMT	0.102486	herm	WT	2022_08_10_NSV129_555syp1_488rad51_dapi_herm1_stitched
18.2243	52.9647	PMT	0.156249	herm	WT	2022_08_10_NSV129_555syp1_488rad51_dapi_herm1_stitched
15.766	68.7307	PMT	0.20276	herm	WT	2022_08_10_NSV129_555syp1_488rad51_dapi_herm1_stitched
11.8365	80.5672	Transition Zone	0.237678	herm	WT	2022_08_10_NSV129_555syp1_488rad51_dapi_herm1_stitched
10.7613	91.3285	Transition Zone	0.269424	herm	WT	2022_08_10_NSV129_555syp1_488rad51_dapi_herm1_stitched
14.4252	105.754	Transition Zone	0.31198	herm	WT	2022_08_10_NSV129_555syp1_488rad51_dapi_herm1_stitched
52.461	158.215	Pachytene	0.466743	herm	WT	2022_08_10_NSV129_555syp1_488rad51_dapi_herm1_stitched
63.1566	221.371	Pachytene	0.653058	herm	WT	2022_08_10_NSV129_555syp1_488rad51_dapi_herm1_stitched
26.0935	247.465	Pachytene	0.730036	herm	WT	2022_08_10_NSV129_555syp1_488rad51_dapi_herm1_stitched
56.7058	304.171	Pachytene	0.897321	herm	WT	2022_08_10_NSV129_555syp1_488rad51_dapi_herm1_stitched
34.8057	338.976	Pachytene	1	herm	WT	2022_08_10_NSV129_555syp1_488rad51_dapi_herm1_stitched
24.1592	24.1592	PMT	0.063369	herm	WT	2022_08_10_NSV129_555syp1_488rad51_dapi_herm2_stitched
10.3538	34.513	PMT	0.0905268	herm	WT	2022_08_10_NSV129_555syp1_488rad51_dapi_herm2_stitched
20.6293	55.1422	PMT	0.144637	herm	WT	2022_08_10_NSV129_555syp1_488rad51_dapi_herm2_stitched
16.6035	71.7457	PMT	0.188187	herm	WT	2022_08_10_NSV129_555syp1_488rad51_dapi_herm2_stitched
8.68442	80.4301	PMT	0.210967	herm	WT	2022_08_10_NSV129_555syp1_488rad51_dapi_herm2_stitched
15.8154	96.2455	Transition Zone	0.25245	herm	WT	2022_08_10_NSV129_555syp1_488rad51_dapi_herm2_stitched
25.5603	121.806	Transition Zone	0.319494	herm	WT	2022_08_10_NSV129_555syp1_488rad51_dapi_herm2_stitched
13.5798	135.386	Transition Zone	0.355114	herm	WT	2022_08_10_NSV129_555syp1_488rad51_dapi_herm2_stitched
7.8838	143.269	Transition Zone	0.375793	herm	WT	2022_08_10_NSV129_555syp1_488rad51_dapi_herm2_stitched
13.9887	157.258	Pachytene	0.412485	herm	WT	2022_08_10_NSV129_555syp1_488rad51_dapi_herm2_stitched
39.4238	196.682	Pachytene	0.515893	herm	WT	2022_08_10_NSV129_555syp1_488rad51_dapi_herm2_stitched
23.8383	220.52	Pachytene	0.57842	herm	WT	2022_08_10_NSV129_555syp1_488rad51_dapi_herm2_stitched
52.7672	273.288	Pachytene	0.716827	herm	WT	2022_08_10_NSV129_555syp1_488rad51_dapi_herm2_stitched
29.9532	303.241	Pachytene	0.795394	herm	WT	2022_08_10_NSV129_555syp1_488rad51_dapi_herm2_stitched
23.057	326.298	Pachytene	0.855872	herm	WT	2022_08_10_NSV129_555syp1_488rad51_dapi_herm2_stitched
36.0639	362.362	Pachytene	0.950467	herm	WT	2022_08_10_NSV129_555syp1_488rad51_dapi_herm2_stitched
18.8843	381.246	Pachytene	1	herm	WT	2022_08_10_NSV129_555syp1_488rad51_dapi_herm2_stitched
23.0959	23.0959	PMT	0.0538396	herm	WT	2022_08_10_NSV129_555syp1_488rad51_dapi_herm4_stitched
9.53293	32.6288	PMT	0.0760621	herm	WT	2022_08_10_NSV129_555syp1_488rad51_dapi_herm4_stitched
12.4202	45.0489	PMT	0.105015	herm	WT	2022_08_10_NSV129_555syp1_488rad51_dapi_herm4_stitched
13.9201	58.969	PMT	0.137465	herm	WT	2022_08_10_NSV129_555syp1_488rad51_dapi_herm4_stitched
22.4743	81.4434	PMT	0.189856	herm	WT	2022_08_10_NSV129_555syp1_488rad51_dapi_herm4_stitched
25.0648	106.508	PMT	0.248285	herm	WT	2022_08_10_NSV129_555syp1_488rad51_dapi_herm4_stitched
10.4339	116.942	Transition Zone	0.272608	herm	WT	2022_08_10_NSV129_555syp1_488rad51_dapi_herm4_stitched
37.7476	154.69	Transition Zone	0.360603	herm	WT	2022_08_10_NSV129_555syp1_488rad51_dapi_herm4_stitched
8.59501	163.285	Transition Zone	0.380639	herm	WT	2022_08_10_NSV129_555syp1_488rad51_dapi_herm4_stitched
34.8192	198.104	Pachytene	0.461807	herm	WT	2022_08_10_NSV129_555syp1_488rad51_dapi_herm4_stitched
23.027	221.131	Pachytene	0.515486	herm	WT	2022_08_10_NSV129_555syp1_488rad51_dapi_herm4_stitched
34.7051	255.836	Pachytene	0.596389	herm	WT	2022_08_10_NSV129_555syp1_488rad51_dapi_herm4_stitched
66.901	322.737	Pachytene	0.752344	herm	WT	2022_08_10_NSV129_555syp1_488rad51_dapi_herm4_stitched
106.238	428.975	Pachytene	1	herm	WT	2022_08_10_NSV129_555syp1_488rad51_dapi_herm4_stitched
31.7139	31.7139	PMT	0.0846587	herm	WT	2022_08_10_NSV129_555syp1_488rad51_dapi_herm5_stitched
26.6458	58.3597	PMT	0.155789	herm	WT	2022_08_10_NSV129_555syp1_488rad51_dapi_herm5_stitched
8.64084	67.0005	PMT	0.178855	herm	WT	2022_08_10_NSV129_555syp1_488rad51_dapi_herm5_stitched
37.7871	104.788	PMT	0.279726	herm	WT	2022_08_10_NSV129_555syp1_488rad51_dapi_herm5_stitched
17.17	121.958	Transition Zone	0.32556	herm	WT	2022_08_10_NSV129_555syp1_488rad51_dapi_herm5_stitched
30.7434	152.701	Transition Zone	0.407628	herm	WT	2022_08_10_NSV129_555syp1_488rad51_dapi_herm5_stitched
23.1338	175.835	Transition Zone	0.469383	herm	WT	2022_08_10_NSV129_555syp1_488rad51_dapi_herm5_stitched
57.3098	233.145	Pachytene	0.622369	herm	WT	2022_08_10_NSV129_555syp1_488rad51_dapi_herm5_stitched
48.2108	281.355	Pachytene	0.751065	herm	WT	2022_08_10_NSV129_555syp1_488rad51_dapi_herm5_stitched
54.6286	335.984	Pachytene	0.896894	herm	WT	2022_08_10_NSV129_555syp1_488rad51_dapi_herm5_stitched
22.3821	358.366	Pachytene	0.956642	herm	WT	2022_08_10_NSV129_555syp1_488rad51_dapi_herm5_stitched
16.2424	374.608	Pachytene	1	herm	WT	2022_08_10_NSV129_555syp1_488rad51_dapi_herm5_stitched
53.512	53.512	PMT	0.150152	male	WT	2022_08_10_NSV129_555syp1_488rad51_dapi_male1_stitched
29.9628	83.4748	PMT	0.234227	male	WT	2022_08_10_NSV129_555syp1_488rad51_dapi_male1_stitched
24.0243	107.499	PMT	0.301638	male	WT	2022_08_10_NSV129_555syp1_488rad51_dapi_male1_stitched
20.4822	127.981	Transition Zone	0.35911	male	WT	2022_08_10_NSV129_555syp1_488rad51_dapi_male1_stitched
18.775	146.756	Transition Zone	0.411792	male	WT	2022_08_10_NSV129_555syp1_488rad51_dapi_male1_stitched
18.1752	164.932	Transition Zone	0.462791	male	WT	2022_08_10_NSV129_555syp1_488rad51_dapi_male1_stitched
14.126	179.058	Transition Zone	0.502428	male	WT	2022_08_10_NSV129_555syp1_488rad51_dapi_male1_stitched
20.1404	199.198	Pachytene	0.558941	male	WT	2022_08_10_NSV129_555syp1_488rad51_dapi_male1_stitched
14.376	213.574	Pachytene	0.59928	male	WT	2022_08_10_NSV129_555syp1_488rad51_dapi_male1_stitched
11.2146	224.789	Pachytene	0.630747	male	WT	2022_08_10_NSV129_555syp1_488rad51_dapi_male1_stitched
20.684	245.473	Pachytene	0.688786	male	WT	2022_08_10_NSV129_555syp1_488rad51_dapi_male1_stitched
19.4539	264.927	Pachytene	0.743373	male	WT	2022_08_10_NSV129_555syp1_488rad51_dapi_male1_stitched
35.4946	300.421	Pachytene	0.842969	male	WT	2022_08_10_NSV129_555syp1_488rad51_dapi_male1_stitched
22.2594	322.681	Pachytene	0.905428	male	WT	2022_08_10_NSV129_555syp1_488rad51_dapi_male1_stitched
33.7039	356.385	Pachytene	1	male	WT	2022_08_10_NSV129_555syp1_488rad51_dapi_male1_stitched
64.075	64.075	PMT	0.171543	male	WT	2022_08_10_NSV129_555syp1_488rad51_dapi_male2_stitched
37.6435	101.718	PMT	0.272323	male	WT	2022_08_10_NSV129_555syp1_488rad51_dapi_male2_stitched
31.9246	133.643	PMT	0.357792	male	WT	2022_08_10_NSV129_555syp1_488rad51_dapi_male2_stitched
11.0693	144.712	Transition Zone	0.387427	male	WT	2022_08_10_NSV129_555syp1_488rad51_dapi_male2_stitched
21.9681	166.68	Transition Zone	0.44624	male	WT	2022_08_10_NSV129_555syp1_488rad51_dapi_male2_stitched
25.0308	191.711	Transition Zone	0.513253	male	WT	2022_08_10_NSV129_555syp1_488rad51_dapi_male2_stitched
6.31493	198.026	Transition Zone	0.530159	male	WT	2022_08_10_NSV129_555syp1_488rad51_dapi_male2_stitched
37.586	235.612	Pachytene	0.630785	male	WT	2022_08_10_NSV129_555syp1_488rad51_dapi_male2_stitched
49.7637	285.376	Pachytene	0.764014	male	WT	2022_08_10_NSV129_555syp1_488rad51_dapi_male2_stitched
31.3982	316.774	Pachytene	0.848074	male	WT	2022_08_10_NSV129_555syp1_488rad51_dapi_male2_stitched
19.6986	336.473	Pachytene	0.900811	male	WT	2022_08_10_NSV129_555syp1_488rad51_dapi_male2_stitched
37.0492	373.522	Pachytene	1	male	WT	2022_08_10_NSV129_555syp1_488rad51_dapi_male2_stitched
25.6435	25.6435	PMT	0.0804919	male	WT	2022_08_10_NSV129_555syp1_488rad51_dapi_male3_stitched
21.0463	46.6898	PMT	0.146554	male	WT	2022_08_10_NSV129_555syp1_488rad51_dapi_male3_stitched
18.9602	65.65	PMT	0.206068	male	WT	2022_08_10_NSV129_555syp1_488rad51_dapi_male3_stitched
18.665	84.315	PMT	0.264655	male	WT	2022_08_10_NSV129_555syp1_488rad51_dapi_male3_stitched
23.2585	107.574	PMT	0.337661	male	WT	2022_08_10_NSV129_555syp1_488rad51_dapi_male3_stitched
10.6908	118.264	Transition Zone	0.371218	male	WT	2022_08_10_NSV129_555syp1_488rad51_dapi_male3_stitched
18.8409	137.105	Transition Zone	0.430357	male	WT	2022_08_10_NSV129_555syp1_488rad51_dapi_male3_stitched
17.4873	154.592	Transition Zone	0.485248	male	WT	2022_08_10_NSV129_555syp1_488rad51_dapi_male3_stitched
19.4306	174.023	Pachytene	0.546238	male	WT	2022_08_10_NSV129_555syp1_488rad51_dapi_male3_stitched
18.0135	192.037	Pachytene	0.602781	male	WT	2022_08_10_NSV129_555syp1_488rad51_dapi_male3_stitched
26.7139	218.751	Pachytene	0.686633	male	WT	2022_08_10_NSV129_555syp1_488rad51_dapi_male3_stitched
51.4348	270.185	Pachytene	0.84808	male	WT	2022_08_10_NSV129_555syp1_488rad51_dapi_male3_stitched
48.3993	318.585	Pachytene	1	male	WT	2022_08_10_NSV129_555syp1_488rad51_dapi_male3_stitched
55.0633	55.0633	PMT	0.164013	male	WT	2022_08_10_NSV129_555syp1_488rad51_dapi_male4_stitched
30.3354	85.3986	PMT	0.25437	male	WT	2022_08_10_NSV129_555syp1_488rad51_dapi_male4_stitched
27.497	112.896	PMT	0.336274	male	WT	2022_08_10_NSV129_555syp1_488rad51_dapi_male4_stitched
7.42074	120.316	Transition Zone	0.358377	male	WT	2022_08_10_NSV129_555syp1_488rad51_dapi_male4_stitched
24.8133	145.13	Transition Zone	0.432287	male	WT	2022_08_10_NSV129_555syp1_488rad51_dapi_male4_stitched
12.6512	157.781	Transition Zone	0.46997	male	WT	2022_08_10_NSV129_555syp1_488rad51_dapi_male4_stitched
19.4988	177.28	Pachytene	0.52805	male	WT	2022_08_10_NSV129_555syp1_488rad51_dapi_male4_stitched
16.5336	193.813	Pachytene	0.577297	male	WT	2022_08_10_NSV129_555syp1_488rad51_dapi_male4_stitched
22.877	216.69	Pachytene	0.645439	male	WT	2022_08_10_NSV129_555syp1_488rad51_dapi_male4_stitched
32.5181	249.208	Pachytene	0.742298	male	WT	2022_08_10_NSV129_555syp1_488rad51_dapi_male4_stitched
38.9569	288.165	Pachytene	0.858336	male	WT	2022_08_10_NSV129_555syp1_488rad51_dapi_male4_stitched
47.5601	335.726	Pachytene	1	male	WT	2022_08_10_NSV129_555syp1_488rad51_dapi_male4_stitched
92.254	92.254	PMT	0.191313	herm	syp3het	2022_08_05_DLW196het_555dsb2_488gfpcosa1_dapi_herm1_stitched
41.7278	133.982	PMT	0.277846	herm	syp3het	2022_08_05_DLW196het_555dsb2_488gfpcosa1_dapi_herm1_stitched
17.0224	151.004	Transition Zone	0.313146	herm	syp3het	2022_08_05_DLW196het_555dsb2_488gfpcosa1_dapi_herm1_stitched
23.821	174.825	Transition Zone	0.362545	herm	syp3het	2022_08_05_DLW196het_555dsb2_488gfpcosa1_dapi_herm1_stitched
32.6923	207.518	Transition Zone	0.430341	herm	syp3het	2022_08_05_DLW196het_555dsb2_488gfpcosa1_dapi_herm1_stitched
53.8701	261.388	Pachytene	0.542055	herm	syp3het	2022_08_05_DLW196het_555dsb2_488gfpcosa1_dapi_herm1_stitched
68.3065	329.694	Pachytene	0.683706	herm	syp3het	2022_08_05_DLW196het_555dsb2_488gfpcosa1_dapi_herm1_stitched
33.5746	363.269	Pachytene	0.753332	herm	syp3het	2022_08_05_DLW196het_555dsb2_488gfpcosa1_dapi_herm1_stitched
68.8294	432.098	Pachytene	0.896067	herm	syp3het	2022_08_05_DLW196het_555dsb2_488gfpcosa1_dapi_herm1_stitched
50.118	482.216	Pachytene	1	herm	syp3het	2022_08_05_DLW196het_555dsb2_488gfpcosa1_dapi_herm1_stitched
24.4825	24.4825	PMT	0.0507964	herm	syp3het	2022_08_05_DLW196het_555dsb2_488gfpcosa1_dapi_herm2_stitched
10.6849	35.1674	PMT	0.0729655	herm	syp3het	2022_08_05_DLW196het_555dsb2_488gfpcosa1_dapi_herm2_stitched
15.2935	50.4609	PMT	0.104697	herm	syp3het	2022_08_05_DLW196het_555dsb2_488gfpcosa1_dapi_herm2_stitched
17.1524	67.6133	PMT	0.140284	herm	syp3het	2022_08_05_DLW196het_555dsb2_488gfpcosa1_dapi_herm2_stitched
47.3705	114.984	PMT	0.238569	herm	syp3het	2022_08_05_DLW196het_555dsb2_488gfpcosa1_dapi_herm2_stitched
12.02	127.004	PMT	0.263508	herm	syp3het	2022_08_05_DLW196het_555dsb2_488gfpcosa1_dapi_herm2_stitched
20.4178	147.422	Transition Zone	0.305871	herm	syp3het	2022_08_05_DLW196het_555dsb2_488gfpcosa1_dapi_herm2_stitched
12.1317	159.553	Transition Zone	0.331042	herm	syp3het	2022_08_05_DLW196het_555dsb2_488gfpcosa1_dapi_herm2_stitched
13.3252	172.878	Transition Zone	0.358689	herm	syp3het	2022_08_05_DLW196het_555dsb2_488gfpcosa1_dapi_herm2_stitched
12.1407	185.019	Transition Zone	0.383879	herm	syp3het	2022_08_05_DLW196het_555dsb2_488gfpcosa1_dapi_herm2_stitched
13.0926	198.112	Transition Zone	0.411044	herm	syp3het	2022_08_05_DLW196het_555dsb2_488gfpcosa1_dapi_herm2_stitched
62.8194	260.931	Pachytene	0.541382	herm	syp3het	2022_08_05_DLW196het_555dsb2_488gfpcosa1_dapi_herm2_stitched
111.81	372.741	Pachytene	0.773365	herm	syp3het	2022_08_05_DLW196het_555dsb2_488gfpcosa1_dapi_herm2_stitched
29.9884	402.729	Pachytene	0.835586	herm	syp3het	2022_08_05_DLW196het_555dsb2_488gfpcosa1_dapi_herm2_stitched
19.7299	422.459	Pachytene	0.876521	herm	syp3het	2022_08_05_DLW196het_555dsb2_488gfpcosa1_dapi_herm2_stitched
29.3096	451.769	Pachytene	0.937333	herm	syp3het	2022_08_05_DLW196het_555dsb2_488gfpcosa1_dapi_herm2_stitched
11.9548	463.724	Pachytene	0.962137	herm	syp3het	2022_08_05_DLW196het_555dsb2_488gfpcosa1_dapi_herm2_stitched
18.2488	481.973	Pachytene	1	herm	syp3het	2022_08_05_DLW196het_555dsb2_488gfpcosa1_dapi_herm2_stitched
41.0389	41.0389	PMT	0.106521	herm	syp3het	2022_08_05_DLW196het_555dsb2_488gfpcosa1_dapi_herm3_stitched
23.6441	64.683	PMT	0.167892	herm	syp3het	2022_08_05_DLW196het_555dsb2_488gfpcosa1_dapi_herm3_stitched
17.6825	82.3656	Transition Zone	0.213789	herm	syp3het	2022_08_05_DLW196het_555dsb2_488gfpcosa1_dapi_herm3_stitched
34.3768	116.742	Transition Zone	0.303018	herm	syp3het	2022_08_05_DLW196het_555dsb2_488gfpcosa1_dapi_herm3_stitched
59.522	176.264	Pachytene	0.457514	herm	syp3het	2022_08_05_DLW196het_555dsb2_488gfpcosa1_dapi_herm3_stitched
62.6762	238.941	Pachytene	0.620197	herm	syp3het	2022_08_05_DLW196het_555dsb2_488gfpcosa1_dapi_herm3_stitched
29.6192	268.56	Pachytene	0.697077	herm	syp3het	2022_08_05_DLW196het_555dsb2_488gfpcosa1_dapi_herm3_stitched
44.8802	313.44	Pachytene	0.813569	herm	syp3het	2022_08_05_DLW196het_555dsb2_488gfpcosa1_dapi_herm3_stitched
71.8256	385.265	Pachytene	1	herm	syp3het	2022_08_05_DLW196het_555dsb2_488gfpcosa1_dapi_herm3_stitched
59.4314	59.4314	PMT	0.132025	herm	syp3het	2022_08_05_DLW196het_555dsb2_488gfpcosa1_dapi_herm4_stitched
50.7134	110.145	PMT	0.244684	herm	syp3het	2022_08_05_DLW196het_555dsb2_488gfpcosa1_dapi_herm4_stitched
32.2002	142.345	Transition Zone	0.316216	herm	syp3het	2022_08_05_DLW196het_555dsb2_488gfpcosa1_dapi_herm4_stitched
34.013	176.358	Transition Zone	0.391775	herm	syp3het	2022_08_05_DLW196het_555dsb2_488gfpcosa1_dapi_herm4_stitched
10.9004	187.258	Transition Zone	0.41599	herm	syp3het	2022_08_05_DLW196het_555dsb2_488gfpcosa1_dapi_herm4_stitched
32.2471	219.506	Pachytene	0.487626	herm	syp3het	2022_08_05_DLW196het_555dsb2_488gfpcosa1_dapi_herm4_stitched
36.8572	256.363	Pachytene	0.569504	herm	syp3het	2022_08_05_DLW196het_555dsb2_488gfpcosa1_dapi_herm4_stitched
59.6488	316.012	Pachytene	0.702012	herm	syp3het	2022_08_05_DLW196het_555dsb2_488gfpcosa1_dapi_herm4_stitched
21.2901	337.302	Pachytene	0.749308	herm	syp3het	2022_08_05_DLW196het_555dsb2_488gfpcosa1_dapi_herm4_stitched
18.5113	355.813	Pachytene	0.79043	herm	syp3het	2022_08_05_DLW196het_555dsb2_488gfpcosa1_dapi_herm4_stitched
41.7519	397.565	Pachytene	0.883181	herm	syp3het	2022_08_05_DLW196het_555dsb2_488gfpcosa1_dapi_herm4_stitched
29.5307	427.096	Pachytene	0.948783	herm	syp3het	2022_08_05_DLW196het_555dsb2_488gfpcosa1_dapi_herm4_stitched
23.0555	450.151	Pachytene	1	herm	syp3het	2022_08_05_DLW196het_555dsb2_488gfpcosa1_dapi_herm4_stitched
71.361	71.361	PMT	0.164654	herm	syp3het	2022_08_05_DLW196het_555dsb2_488gfpcosa1_dapi_herm5_stitched
46.8986	118.26	PMT	0.272865	herm	syp3het	2022_08_05_DLW196het_555dsb2_488gfpcosa1_dapi_herm5_stitched
17.3828	135.642	Transition Zone	0.312973	herm	syp3het	2022_08_05_DLW196het_555dsb2_488gfpcosa1_dapi_herm5_stitched
53.8688	189.511	Transition Zone	0.437267	herm	syp3het	2022_08_05_DLW196het_555dsb2_488gfpcosa1_dapi_herm5_stitched
45.189	234.7	Transition Zone	0.541533	herm	syp3het	2022_08_05_DLW196het_555dsb2_488gfpcosa1_dapi_herm5_stitched
74.5165	309.217	Pachytene	0.713468	herm	syp3het	2022_08_05_DLW196het_555dsb2_488gfpcosa1_dapi_herm5_stitched
35.9865	345.203	Pachytene	0.796501	herm	syp3het	2022_08_05_DLW196het_555dsb2_488gfpcosa1_dapi_herm5_stitched
41.4016	386.605	Pachytene	0.892028	herm	syp3het	2022_08_05_DLW196het_555dsb2_488gfpcosa1_dapi_herm5_stitched
46.7949	433.4	Pachytene	1	herm	syp3het	2022_08_05_DLW196het_555dsb2_488gfpcosa1_dapi_herm5_stitched
38.1952	38.1952	PMT	0.0919501	herm	syp2het	2022_08_05_DLW195het_555dsb2_488gfpcosa1_dapi_herm2_stitched
23.6834	61.8786	PMT	0.148965	herm	syp2het	2022_08_05_DLW195het_555dsb2_488gfpcosa1_dapi_herm2_stitched
20.8397	82.7183	PMT	0.199134	herm	syp2het	2022_08_05_DLW195het_555dsb2_488gfpcosa1_dapi_herm2_stitched
26.118	108.836	PMT	0.26201	herm	syp2het	2022_08_05_DLW195het_555dsb2_488gfpcosa1_dapi_herm2_stitched
20.2204	129.057	Transition Zone	0.310688	herm	syp2het	2022_08_05_DLW195het_555dsb2_488gfpcosa1_dapi_herm2_stitched
27.8367	156.894	Transition Zone	0.377701	herm	syp2het	2022_08_05_DLW195het_555dsb2_488gfpcosa1_dapi_herm2_stitched
47.0589	203.952	Pachytene	0.490989	herm	syp2het	2022_08_05_DLW195het_555dsb2_488gfpcosa1_dapi_herm2_stitched
42.4884	246.441	Pachytene	0.593275	herm	syp2het	2022_08_05_DLW195het_555dsb2_488gfpcosa1_dapi_herm2_stitched
43.6016	290.042	Pachytene	0.69824	herm	syp2het	2022_08_05_DLW195het_555dsb2_488gfpcosa1_dapi_herm2_stitched
54.9323	344.975	Pachytene	0.830482	herm	syp2het	2022_08_05_DLW195het_555dsb2_488gfpcosa1_dapi_herm2_stitched
70.416	415.391	Pachytene	1	herm	syp2het	2022_08_05_DLW195het_555dsb2_488gfpcosa1_dapi_herm2_stitched
43.1808	43.1808	PMT	0.126022	herm	syp2het	2022_08_05_DLW195het_555dsb2_488gfpcosa1_dapi_herm3_stitched
41.3058	84.4866	PMT	0.246573	herm	syp2het	2022_08_05_DLW195het_555dsb2_488gfpcosa1_dapi_herm3_stitched
16.8857	101.372	Transition Zone	0.295853	herm	syp2het	2022_08_05_DLW195het_555dsb2_488gfpcosa1_dapi_herm3_stitched
45.1742	146.546	Transition Zone	0.427693	herm	syp2het	2022_08_05_DLW195het_555dsb2_488gfpcosa1_dapi_herm3_stitched
56.0971	202.644	Pachytene	0.591412	herm	syp2het	2022_08_05_DLW195het_555dsb2_488gfpcosa1_dapi_herm3_stitched
25.3299	227.973	Pachytene	0.665337	herm	syp2het	2022_08_05_DLW195het_555dsb2_488gfpcosa1_dapi_herm3_stitched
23.681	251.655	Pachytene	0.73445	herm	syp2het	2022_08_05_DLW195het_555dsb2_488gfpcosa1_dapi_herm3_stitched
35.0725	286.727	Pachytene	0.836808	herm	syp2het	2022_08_05_DLW195het_555dsb2_488gfpcosa1_dapi_herm3_stitched
26.3363	313.063	Pachytene	0.91367	herm	syp2het	2022_08_05_DLW195het_555dsb2_488gfpcosa1_dapi_herm3_stitched
29.5803	342.644	Pachytene	1	herm	syp2het	2022_08_05_DLW195het_555dsb2_488gfpcosa1_dapi_herm3_stitched
57.5257	57.5257	PMT	0.138811	herm	syp2het	2022_08_05_DLW195het_555dsb2_488gfpcosa1_dapi_herm5_stitched
22.8751	80.4008	PMT	0.194009	herm	syp2het	2022_08_05_DLW195het_555dsb2_488gfpcosa1_dapi_herm5_stitched
31.6174	112.018	PMT	0.270302	herm	syp2het	2022_08_05_DLW195het_555dsb2_488gfpcosa1_dapi_herm5_stitched
48.2539	160.272	Transition Zone	0.38674	herm	syp2het	2022_08_05_DLW195het_555dsb2_488gfpcosa1_dapi_herm5_stitched
38.6952	198.967	Transition Zone	0.480112	herm	syp2het	2022_08_05_DLW195het_555dsb2_488gfpcosa1_dapi_herm5_stitched
34.1506	233.118	Pachytene	0.562519	herm	syp2het	2022_08_05_DLW195het_555dsb2_488gfpcosa1_dapi_herm5_stitched
14.1694	247.287	Pachytene	0.59671	herm	syp2het	2022_08_05_DLW195het_555dsb2_488gfpcosa1_dapi_herm5_stitched
70.7695	318.057	Pachytene	0.767478	herm	syp2het	2022_08_05_DLW195het_555dsb2_488gfpcosa1_dapi_herm5_stitched
42.3881	360.445	Pachytene	0.869761	herm	syp2het	2022_08_05_DLW195het_555dsb2_488gfpcosa1_dapi_herm5_stitched
23.1002	383.545	Pachytene	0.925503	herm	syp2het	2022_08_05_DLW195het_555dsb2_488gfpcosa1_dapi_herm5_stitched
30.873	414.418	Pachytene	1	herm	syp2het	2022_08_05_DLW195het_555dsb2_488gfpcosa1_dapi_herm5_stitched
75.0304	75.0304	PMT	0.203825	herm	syp2het	2022_08_05_DLW195het_555dsb2_488gfpcosa1_dapi_herm6_stitched
7.66138	82.6918	PMT	0.224638	herm	syp2het	2022_08_05_DLW195het_555dsb2_488gfpcosa1_dapi_herm6_stitched
50.4016	133.093	Transition Zone	0.361557	herm	syp2het	2022_08_05_DLW195het_555dsb2_488gfpcosa1_dapi_herm6_stitched
13.5708	146.664	Transition Zone	0.398423	herm	syp2het	2022_08_05_DLW195het_555dsb2_488gfpcosa1_dapi_herm6_stitched
78.7687	225.433	Pachytene	0.612404	herm	syp2het	2022_08_05_DLW195het_555dsb2_488gfpcosa1_dapi_herm6_stitched
29.0347	254.468	Pachytene	0.691279	herm	syp2het	2022_08_05_DLW195het_555dsb2_488gfpcosa1_dapi_herm6_stitched
12.6986	267.166	Pachytene	0.725776	herm	syp2het	2022_08_05_DLW195het_555dsb2_488gfpcosa1_dapi_herm6_stitched
13.6619	280.828	Pachytene	0.762889	herm	syp2het	2022_08_05_DLW195het_555dsb2_488gfpcosa1_dapi_herm6_stitched
18.5994	299.427	Pachytene	0.813416	herm	syp2het	2022_08_05_DLW195het_555dsb2_488gfpcosa1_dapi_herm6_stitched
17.8528	317.28	Pachytene	0.861914	herm	syp2het	2022_08_05_DLW195het_555dsb2_488gfpcosa1_dapi_herm6_stitched
19.4167	336.697	Pachytene	0.914661	herm	syp2het	2022_08_05_DLW195het_555dsb2_488gfpcosa1_dapi_herm6_stitched
31.4143	368.111	Pachytene	1	herm	syp2het	2022_08_05_DLW195het_555dsb2_488gfpcosa1_dapi_herm6_stitched
55.6833	55.6833	PMT	0.141252	herm	syp2het	2022_08_05_DLW195het_555dsb2_488gfpcosa1_dapi_herm7_stitched
29.8729	85.5563	PMT	0.217031	herm	syp2het	2022_08_05_DLW195het_555dsb2_488gfpcosa1_dapi_herm7_stitched
30.0188	115.575	Transition Zone	0.29318	herm	syp2het	2022_08_05_DLW195het_555dsb2_488gfpcosa1_dapi_herm7_stitched
44.3242	159.899	Transition Zone	0.405617	herm	syp2het	2022_08_05_DLW195het_555dsb2_488gfpcosa1_dapi_herm7_stitched
72.5859	232.485	Pachytene	0.589746	herm	syp2het	2022_08_05_DLW195het_555dsb2_488gfpcosa1_dapi_herm7_stitched
54.1395	286.625	Pachytene	0.727082	herm	syp2het	2022_08_05_DLW195het_555dsb2_488gfpcosa1_dapi_herm7_stitched
47.3484	333.973	Pachytene	0.84719	herm	syp2het	2022_08_05_DLW195het_555dsb2_488gfpcosa1_dapi_herm7_stitched
60.2394	394.212	Pachytene	1	herm	syp2het	2022_08_05_DLW195het_555dsb2_488gfpcosa1_dapi_herm7_stitched
55.4662	55.4662	PMT	0.198061	herm	syp2het	2022_08_05_DLW195het_555dsb2_488gfpcosa1_dapi_herm9_stitched
18.327	73.7932	PMT	0.263504	herm	syp2het	2022_08_05_DLW195het_555dsb2_488gfpcosa1_dapi_herm9_stitched
13.0064	86.7997	Transition Zone	0.309948	herm	syp2het	2022_08_05_DLW195het_555dsb2_488gfpcosa1_dapi_herm9_stitched
22.8158	109.615	Transition Zone	0.39142	herm	syp2het	2022_08_05_DLW195het_555dsb2_488gfpcosa1_dapi_herm9_stitched
43.3259	152.941	Pachytene	0.54613	herm	syp2het	2022_08_05_DLW195het_555dsb2_488gfpcosa1_dapi_herm9_stitched
31.3496	184.291	Pachytene	0.658074	herm	syp2het	2022_08_05_DLW195het_555dsb2_488gfpcosa1_dapi_herm9_stitched
36.9838	221.275	Pachytene	0.790138	herm	syp2het	2022_08_05_DLW195het_555dsb2_488gfpcosa1_dapi_herm9_stitched
31.0951	252.37	Pachytene	0.901173	herm	syp2het	2022_08_05_DLW195het_555dsb2_488gfpcosa1_dapi_herm9_stitched
15.5452	267.915	Pachytene	0.956683	herm	syp2het	2022_08_05_DLW195het_555dsb2_488gfpcosa1_dapi_herm9_stitched
12.1308	280.046	Pachytene	1	herm	syp2het	2022_08_05_DLW195het_555dsb2_488gfpcosa1_dapi_herm9_stitched
37.9014	37.9014	PMT	0.102314	herm	syp2het	2022_08_05_DLW195het_555dsb2_488gfpcosa1_dapi_herm10_stitched
26.1135	64.0149	PMT	0.172807	herm	syp2het	2022_08_05_DLW195het_555dsb2_488gfpcosa1_dapi_herm10_stitched
25.024	89.0389	Transition Zone	0.240358	herm	syp2het	2022_08_05_DLW195het_555dsb2_488gfpcosa1_dapi_herm10_stitched
24.1914	113.23	Transition Zone	0.305662	herm	syp2het	2022_08_05_DLW195het_555dsb2_488gfpcosa1_dapi_herm10_stitched
46.2691	159.499	Pachytene	0.430565	herm	syp2het	2022_08_05_DLW195het_555dsb2_488gfpcosa1_dapi_herm10_stitched
36.4816	195.981	Pachytene	0.529046	herm	syp2het	2022_08_05_DLW195het_555dsb2_488gfpcosa1_dapi_herm10_stitched
48.6523	244.633	Pachytene	0.660381	herm	syp2het	2022_08_05_DLW195het_555dsb2_488gfpcosa1_dapi_herm10_stitched
50.8925	295.526	Pachytene	0.797764	herm	syp2het	2022_08_05_DLW195het_555dsb2_488gfpcosa1_dapi_herm10_stitched
33.2729	328.799	Pachytene	0.887583	herm	syp2het	2022_08_05_DLW195het_555dsb2_488gfpcosa1_dapi_herm10_stitched
26.205	355.004	Pachytene	0.958323	herm	syp2het	2022_08_05_DLW195het_555dsb2_488gfpcosa1_dapi_herm10_stitched
15.4389	370.443	Pachytene	1	herm	syp2het	2022_08_05_DLW195het_555dsb2_488gfpcosa1_dapi_herm10_stitched
50.2133	50.2133	PMT	0.138172	herm	syp2het	2022_08_05_DLW195het_555dsb2_488gfpcosa1_dapi_herm12_stitched
34.5019	84.7152	PMT	0.233111	herm	syp2het	2022_08_05_DLW195het_555dsb2_488gfpcosa1_dapi_herm12_stitched
22.9986	107.714	Transition Zone	0.296396	herm	syp2het	2022_08_05_DLW195het_555dsb2_488gfpcosa1_dapi_herm12_stitched
40.1981	147.912	Transition Zone	0.407009	herm	syp2het	2022_08_05_DLW195het_555dsb2_488gfpcosa1_dapi_herm12_stitched
45.7413	193.653	Pachytene	0.532875	herm	syp2het	2022_08_05_DLW195het_555dsb2_488gfpcosa1_dapi_herm12_stitched
73.3303	266.983	Pachytene	0.734658	herm	syp2het	2022_08_05_DLW195het_555dsb2_488gfpcosa1_dapi_herm12_stitched
24.5186	291.502	Pachytene	0.802126	herm	syp2het	2022_08_05_DLW195het_555dsb2_488gfpcosa1_dapi_herm12_stitched
47.0177	338.52	Pachytene	0.931505	herm	syp2het	2022_08_05_DLW195het_555dsb2_488gfpcosa1_dapi_herm12_stitched
16.4085	354.928	Pachytene	0.976656	herm	syp2het	2022_08_05_DLW195het_555dsb2_488gfpcosa1_dapi_herm12_stitched
8.48354	363.412	Pachytene	1	herm	syp2het	2022_08_05_DLW195het_555dsb2_488gfpcosa1_dapi_herm12_stitched
45.6383	45.6383	PMT	0.10634	herm	syp2het	2022_08_05_DLW195het_555dsb2_488gfpcosa1_dapi_herm13_stitched
32.1554	77.7937	PMT	0.181264	herm	syp2het	2022_08_05_DLW195het_555dsb2_488gfpcosa1_dapi_herm13_stitched
20.009	97.8027	PMT	0.227886	herm	syp2het	2022_08_05_DLW195het_555dsb2_488gfpcosa1_dapi_herm13_stitched
30.0107	127.813	Transition Zone	0.297813	herm	syp2het	2022_08_05_DLW195het_555dsb2_488gfpcosa1_dapi_herm13_stitched
49.6072	177.421	Transition Zone	0.413401	herm	syp2het	2022_08_05_DLW195het_555dsb2_488gfpcosa1_dapi_herm13_stitched
28.787	206.208	Pachytene	0.480477	herm	syp2het	2022_08_05_DLW195het_555dsb2_488gfpcosa1_dapi_herm13_stitched
28.2046	234.412	Pachytene	0.546195	herm	syp2het	2022_08_05_DLW195het_555dsb2_488gfpcosa1_dapi_herm13_stitched
77.531	311.943	Pachytene	0.726847	herm	syp2het	2022_08_05_DLW195het_555dsb2_488gfpcosa1_dapi_herm13_stitched
80.7372	392.68	Pachytene	0.91497	herm	syp2het	2022_08_05_DLW195het_555dsb2_488gfpcosa1_dapi_herm13_stitched
36.4926	429.173	Pachytene	1	herm	syp2het	2022_08_05_DLW195het_555dsb2_488gfpcosa1_dapi_herm13_stitched
35.7957	35.7957	PMT	0.110953	herm	WT	2022_08_06_AV630_555dsb2_488gfpcosa1_herm1_stitched
29.4319	65.2275	PMT	0.20218	herm	WT	2022_08_06_AV630_555dsb2_488gfpcosa1_herm1_stitched
30.6282	95.8557	PMT	0.297116	herm	WT	2022_08_06_AV630_555dsb2_488gfpcosa1_herm1_stitched
9.99902	105.855	Transition Zone	0.328109	herm	WT	2022_08_06_AV630_555dsb2_488gfpcosa1_herm1_stitched
28.0485	133.903	Transition Zone	0.415048	herm	WT	2022_08_06_AV630_555dsb2_488gfpcosa1_herm1_stitched
20.0132	153.916	Pachytene	0.477082	herm	WT	2022_08_06_AV630_555dsb2_488gfpcosa1_herm1_stitched
22.0706	175.987	Pachytene	0.545492	herm	WT	2022_08_06_AV630_555dsb2_488gfpcosa1_herm1_stitched
31.987	207.974	Pachytene	0.644639	herm	WT	2022_08_06_AV630_555dsb2_488gfpcosa1_herm1_stitched
33.4974	241.471	Pachytene	0.748468	herm	WT	2022_08_06_AV630_555dsb2_488gfpcosa1_herm1_stitched
26.9457	268.417	Pachytene	0.83199	herm	WT	2022_08_06_AV630_555dsb2_488gfpcosa1_herm1_stitched
23.1437	291.561	Pachytene	0.903726	herm	WT	2022_08_06_AV630_555dsb2_488gfpcosa1_herm1_stitched
19.6269	311.188	Pachytene	0.964562	herm	WT	2022_08_06_AV630_555dsb2_488gfpcosa1_herm1_stitched
11.433	322.621	Pachytene	1	herm	WT	2022_08_06_AV630_555dsb2_488gfpcosa1_herm1_stitched
14.3906	14.3906	PMT	0.0384189	herm	WT	2022_08_06_AV630_555dsb2_488gfpcosa1_herm2_stitched
45.3489	59.7395	PMT	0.159488	herm	WT	2022_08_06_AV630_555dsb2_488gfpcosa1_herm2_stitched
25.5888	85.3283	PMT	0.227802	herm	WT	2022_08_06_AV630_555dsb2_488gfpcosa1_herm2_stitched
5.69273	91.021	Transition Zone	0.243	herm	WT	2022_08_06_AV630_555dsb2_488gfpcosa1_herm2_stitched
39.2209	130.242	Transition Zone	0.347709	herm	WT	2022_08_06_AV630_555dsb2_488gfpcosa1_herm2_stitched
61.8428	192.085	Pachytene	0.512812	herm	WT	2022_08_06_AV630_555dsb2_488gfpcosa1_herm2_stitched
48.475	240.56	Pachytene	0.642226	herm	WT	2022_08_06_AV630_555dsb2_488gfpcosa1_herm2_stitched
26.6368	267.196	Pachytene	0.713339	herm	WT	2022_08_06_AV630_555dsb2_488gfpcosa1_herm2_stitched
30.1004	297.297	Pachytene	0.793698	herm	WT	2022_08_06_AV630_555dsb2_488gfpcosa1_herm2_stitched
34.2343	331.531	Pachytene	0.885094	herm	WT	2022_08_06_AV630_555dsb2_488gfpcosa1_herm2_stitched
19.4513	350.982	Pachytene	0.937024	herm	WT	2022_08_06_AV630_555dsb2_488gfpcosa1_herm2_stitched
23.5891	374.572	Pachytene	1	herm	WT	2022_08_06_AV630_555dsb2_488gfpcosa1_herm2_stitched
56.5336	56.5336	PMT	0.161377	herm	WT	2022_08_06_AV630_555dsb2_488gfpcosa1_herm3_stitched
12.6162	69.1498	PMT	0.19739	herm	WT	2022_08_06_AV630_555dsb2_488gfpcosa1_herm3_stitched
11.9478	81.0976	Transition Zone	0.231496	herm	WT	2022_08_06_AV630_555dsb2_488gfpcosa1_herm3_stitched
21.9815	103.079	Transition Zone	0.294243	herm	WT	2022_08_06_AV630_555dsb2_488gfpcosa1_herm3_stitched
42.7137	145.793	Pachytene	0.41617	herm	WT	2022_08_06_AV630_555dsb2_488gfpcosa1_herm3_stitched
39.191	184.984	Pachytene	0.528042	herm	WT	2022_08_06_AV630_555dsb2_488gfpcosa1_herm3_stitched
56.2002	241.184	Pachytene	0.688467	herm	WT	2022_08_06_AV630_555dsb2_488gfpcosa1_herm3_stitched
49.5757	290.76	Pachytene	0.829983	herm	WT	2022_08_06_AV630_555dsb2_488gfpcosa1_herm3_stitched
23.0268	313.787	Pachytene	0.895713	herm	WT	2022_08_06_AV630_555dsb2_488gfpcosa1_herm3_stitched
36.5337	350.32	Pachytene	1	herm	WT	2022_08_06_AV630_555dsb2_488gfpcosa1_herm3_stitched
32.8722	32.8722	PMT	0.090296	herm	WT	2022_08_06_AV630_555dsb2_488gfpcosa1_herm4_stitched
19.6611	52.5333	PMT	0.144303	herm	WT	2022_08_06_AV630_555dsb2_488gfpcosa1_herm4_stitched
32.4785	85.0118	PMT	0.233517	herm	WT	2022_08_06_AV630_555dsb2_488gfpcosa1_herm4_stitched
13.4106	98.4224	Transition Zone	0.270354	herm	WT	2022_08_06_AV630_555dsb2_488gfpcosa1_herm4_stitched
9.20677	107.629	Transition Zone	0.295644	herm	WT	2022_08_06_AV630_555dsb2_488gfpcosa1_herm4_stitched
14.1148	121.744	Transition Zone	0.334416	herm	WT	2022_08_06_AV630_555dsb2_488gfpcosa1_herm4_stitched
43.6969	165.441	Pachytene	0.454446	herm	WT	2022_08_06_AV630_555dsb2_488gfpcosa1_herm4_stitched
34.4344	199.875	Pachytene	0.549033	herm	WT	2022_08_06_AV630_555dsb2_488gfpcosa1_herm4_stitched
32.3068	232.182	Pachytene	0.637776	herm	WT	2022_08_06_AV630_555dsb2_488gfpcosa1_herm4_stitched
36.1106	268.293	Pachytene	0.736967	herm	WT	2022_08_06_AV630_555dsb2_488gfpcosa1_herm4_stitched
22.8689	291.162	Pachytene	0.799785	herm	WT	2022_08_06_AV630_555dsb2_488gfpcosa1_herm4_stitched
23.3525	314.514	Pachytene	0.863932	herm	WT	2022_08_06_AV630_555dsb2_488gfpcosa1_herm4_stitched
23.8457	338.36	Pachytene	0.929433	herm	WT	2022_08_06_AV630_555dsb2_488gfpcosa1_herm4_stitched
25.69	364.05	Pachytene	1	herm	WT	2022_08_06_AV630_555dsb2_488gfpcosa1_herm4_stitched
45.3419	45.3419	PMT	0.106555	herm	WT	2022_08_06_AV630_555dsb2_488gfpcosa1_herm5_stitched
72.8123	118.154	PMT	0.277667	herm	WT	2022_08_06_AV630_555dsb2_488gfpcosa1_herm5_stitched
13.4488	131.603	Transition Zone	0.309272	herm	WT	2022_08_06_AV630_555dsb2_488gfpcosa1_herm5_stitched
28.1911	159.794	Transition Zone	0.375522	herm	WT	2022_08_06_AV630_555dsb2_488gfpcosa1_herm5_stitched
19.9902	179.784	Transition Zone	0.422499	herm	WT	2022_08_06_AV630_555dsb2_488gfpcosa1_herm5_stitched
23.6856	203.47	Transition Zone	0.478161	herm	WT	2022_08_06_AV630_555dsb2_488gfpcosa1_herm5_stitched
26.2132	229.683	Pachytene	0.539763	herm	WT	2022_08_06_AV630_555dsb2_488gfpcosa1_herm5_stitched
23.5653	253.249	Pachytene	0.595143	herm	WT	2022_08_06_AV630_555dsb2_488gfpcosa1_herm5_stitched
20.6436	273.892	Pachytene	0.643656	herm	WT	2022_08_06_AV630_555dsb2_488gfpcosa1_herm5_stitched
16.6713	290.563	Pachytene	0.682834	herm	WT	2022_08_06_AV630_555dsb2_488gfpcosa1_herm5_stitched
19.0462	309.61	Pachytene	0.727593	herm	WT	2022_08_06_AV630_555dsb2_488gfpcosa1_herm5_stitched
27.693	337.303	Pachytene	0.792673	herm	WT	2022_08_06_AV630_555dsb2_488gfpcosa1_herm5_stitched
20.677	357.98	Pachytene	0.841264	herm	WT	2022_08_06_AV630_555dsb2_488gfpcosa1_herm5_stitched
23.1333	381.113	Pachytene	0.895628	herm	WT	2022_08_06_AV630_555dsb2_488gfpcosa1_herm5_stitched
44.4128	425.526	Pachytene	1	herm	WT	2022_08_06_AV630_555dsb2_488gfpcosa1_herm5_stitched
52.0133	52.0133	PMT	0.131507	herm	WT	2022_08_06_AV630_555dsb2_488gfpcosa1_herm6_stitched
28.9502	80.9635	PMT	0.204703	herm	WT	2022_08_06_AV630_555dsb2_488gfpcosa1_herm6_stitched
18.0985	99.062	Transition Zone	0.250462	herm	WT	2022_08_06_AV630_555dsb2_488gfpcosa1_herm6_stitched
30.4293	129.491	Transition Zone	0.327398	herm	WT	2022_08_06_AV630_555dsb2_488gfpcosa1_herm6_stitched
82.2372	211.729	Pachytene	0.535322	herm	WT	2022_08_06_AV630_555dsb2_488gfpcosa1_herm6_stitched
66.0387	277.767	Pachytene	0.70229	herm	WT	2022_08_06_AV630_555dsb2_488gfpcosa1_herm6_stitched
40.3455	318.113	Pachytene	0.804297	herm	WT	2022_08_06_AV630_555dsb2_488gfpcosa1_herm6_stitched
77.4038	395.516	Pachytene	1	herm	WT	2022_08_06_AV630_555dsb2_488gfpcosa1_herm6_stitched
42.9738	42.9738	PMT	0.11178	herm	WT	2022_08_06_AV630_555dsb2_488gfpcosa1_herm7_stitched
14.0397	57.0135	PMT	0.148299	herm	WT	2022_08_06_AV630_555dsb2_488gfpcosa1_herm7_stitched
18.435	75.4485	PMT	0.19625	herm	WT	2022_08_06_AV630_555dsb2_488gfpcosa1_herm7_stitched
37.5988	113.047	PMT	0.294049	herm	WT	2022_08_06_AV630_555dsb2_488gfpcosa1_herm7_stitched
26.9762	140.023	Transition Zone	0.364217	herm	WT	2022_08_06_AV630_555dsb2_488gfpcosa1_herm7_stitched
29.1526	169.176	Transition Zone	0.440047	herm	WT	2022_08_06_AV630_555dsb2_488gfpcosa1_herm7_stitched
33.7865	202.963	Pachytene	0.527929	herm	WT	2022_08_06_AV630_555dsb2_488gfpcosa1_herm7_stitched
18.9511	221.914	Pachytene	0.577223	herm	WT	2022_08_06_AV630_555dsb2_488gfpcosa1_herm7_stitched
15.7598	237.673	Pachytene	0.618216	herm	WT	2022_08_06_AV630_555dsb2_488gfpcosa1_herm7_stitched
22.7347	260.408	Pachytene	0.677352	herm	WT	2022_08_06_AV630_555dsb2_488gfpcosa1_herm7_stitched
12.7984	273.206	Pachytene	0.710642	herm	WT	2022_08_06_AV630_555dsb2_488gfpcosa1_herm7_stitched
17.2265	290.433	Pachytene	0.75545	herm	WT	2022_08_06_AV630_555dsb2_488gfpcosa1_herm7_stitched
29.8897	320.323	Pachytene	0.833197	herm	WT	2022_08_06_AV630_555dsb2_488gfpcosa1_herm7_stitched
15.0569	335.38	Pachytene	0.872361	herm	WT	2022_08_06_AV630_555dsb2_488gfpcosa1_herm7_stitched
18.7325	354.112	Pachytene	0.921087	herm	WT	2022_08_06_AV630_555dsb2_488gfpcosa1_herm7_stitched
30.3381	384.45	Pachytene	1	herm	WT	2022_08_06_AV630_555dsb2_488gfpcosa1_herm7_stitched
28.7365	28.7365	PMT	0.0870717	herm	WT	2022_08_06_AV630_555dsb2_488gfpcosa1_herm9_stitched
10.4421	39.1786	PMT	0.118711	herm	WT	2022_08_06_AV630_555dsb2_488gfpcosa1_herm9_stitched
9.63618	48.8148	PMT	0.147909	herm	WT	2022_08_06_AV630_555dsb2_488gfpcosa1_herm9_stitched
11.9055	60.7203	PMT	0.183983	herm	WT	2022_08_06_AV630_555dsb2_488gfpcosa1_herm9_stitched
14.6121	75.3324	PMT	0.228257	herm	WT	2022_08_06_AV630_555dsb2_488gfpcosa1_herm9_stitched
23.5997	98.9321	Transition Zone	0.299764	herm	WT	2022_08_06_AV630_555dsb2_488gfpcosa1_herm9_stitched
7.03352	105.966	Transition Zone	0.321076	herm	WT	2022_08_06_AV630_555dsb2_488gfpcosa1_herm9_stitched
46.4908	152.456	Pachytene	0.461943	herm	WT	2022_08_06_AV630_555dsb2_488gfpcosa1_herm9_stitched
35.5046	187.961	Pachytene	0.569522	herm	WT	2022_08_06_AV630_555dsb2_488gfpcosa1_herm9_stitched
56.2973	244.258	Pachytene	0.740103	herm	WT	2022_08_06_AV630_555dsb2_488gfpcosa1_herm9_stitched
30.6839	274.942	Pachytene	0.833075	herm	WT	2022_08_06_AV630_555dsb2_488gfpcosa1_herm9_stitched
55.0907	330.033	Pachytene	1	herm	WT	2022_08_06_AV630_555dsb2_488gfpcosa1_herm9_stitched
34.0669	34.0669	PMT	0.10232	herm	WT	2022_08_06_AV630_555dsb2_488gfpcosa1_herm10_stitched
20.2549	54.3217	PMT	0.163155	herm	WT	2022_08_06_AV630_555dsb2_488gfpcosa1_herm10_stitched
12.2218	66.5436	PMT	0.199863	herm	WT	2022_08_06_AV630_555dsb2_488gfpcosa1_herm10_stitched
17.2733	83.8168	PMT	0.251744	herm	WT	2022_08_06_AV630_555dsb2_488gfpcosa1_herm10_stitched
18.2256	102.042	PMT	0.306484	herm	WT	2022_08_06_AV630_555dsb2_488gfpcosa1_herm10_stitched
13.0885	115.131	Transition Zone	0.345795	herm	WT	2022_08_06_AV630_555dsb2_488gfpcosa1_herm10_stitched
14.2775	129.408	Transition Zone	0.388678	herm	WT	2022_08_06_AV630_555dsb2_488gfpcosa1_herm10_stitched
19.4581	148.867	Transition Zone	0.44712	herm	WT	2022_08_06_AV630_555dsb2_488gfpcosa1_herm10_stitched
24.8583	173.725	Pachytene	0.521782	herm	WT	2022_08_06_AV630_555dsb2_488gfpcosa1_herm10_stitched
33.9464	207.671	Pachytene	0.62374	herm	WT	2022_08_06_AV630_555dsb2_488gfpcosa1_herm10_stitched
34.988	242.659	Pachytene	0.728826	herm	WT	2022_08_06_AV630_555dsb2_488gfpcosa1_herm10_stitched
38.5396	281.199	Pachytene	0.84458	herm	WT	2022_08_06_AV630_555dsb2_488gfpcosa1_herm10_stitched
51.7465	332.945	Pachytene	1	herm	WT	2022_08_06_AV630_555dsb2_488gfpcosa1_herm10_stitched
58.5056	58.5056	PMT	0.176161	herm	WT	2022_08_06_AV630_555dsb2_488gfpcosa1_herm12_stitched
26.7646	85.2702	Transition Zone	0.256749	herm	WT	2022_08_06_AV630_555dsb2_488gfpcosa1_herm12_stitched
15.3858	100.656	Transition Zone	0.303076	herm	WT	2022_08_06_AV630_555dsb2_488gfpcosa1_herm12_stitched
9.05461	109.711	Pachytene	0.330339	herm	WT	2022_08_06_AV630_555dsb2_488gfpcosa1_herm12_stitched
11.0953	120.806	Pachytene	0.363747	herm	WT	2022_08_06_AV630_555dsb2_488gfpcosa1_herm12_stitched
17.0383	137.844	Pachytene	0.41505	herm	WT	2022_08_06_AV630_555dsb2_488gfpcosa1_herm12_stitched
11.7828	149.627	Pachytene	0.450528	herm	WT	2022_08_06_AV630_555dsb2_488gfpcosa1_herm12_stitched
15.0033	164.63	Pachytene	0.495703	herm	WT	2022_08_06_AV630_555dsb2_488gfpcosa1_herm12_stitched
14.8844	179.515	Pachytene	0.540519	herm	WT	2022_08_06_AV630_555dsb2_488gfpcosa1_herm12_stitched
21.953	201.468	Pachytene	0.60662	herm	WT	2022_08_06_AV630_555dsb2_488gfpcosa1_herm12_stitched
18.3314	219.799	Pachytene	0.661816	herm	WT	2022_08_06_AV630_555dsb2_488gfpcosa1_herm12_stitched
29.5882	249.387	Pachytene	0.750906	herm	WT	2022_08_06_AV630_555dsb2_488gfpcosa1_herm12_stitched
29.8831	279.27	Pachytene	0.840884	herm	WT	2022_08_06_AV630_555dsb2_488gfpcosa1_herm12_stitched
52.8448	332.115	Pachytene	1	herm	WT	2022_08_06_AV630_555dsb2_488gfpcosa1_herm12_stitched
29.2721	29.2721	PMT	0.0840002	herm	syp3het	2022_08_06_DLW196het_555dsb2_488gfpcosa1_herm1_stitched
32.3432	61.6153	PMT	0.176813	herm	syp3het	2022_08_06_DLW196het_555dsb2_488gfpcosa1_herm1_stitched
17.4812	79.0964	Transition Zone	0.226978	herm	syp3het	2022_08_06_DLW196het_555dsb2_488gfpcosa1_herm1_stitched
18.6126	97.709	Transition Zone	0.280389	herm	syp3het	2022_08_06_DLW196het_555dsb2_488gfpcosa1_herm1_stitched
33.7139	131.423	Pachytene	0.377136	herm	syp3het	2022_08_06_DLW196het_555dsb2_488gfpcosa1_herm1_stitched
52.4493	183.872	Pachytene	0.527646	herm	syp3het	2022_08_06_DLW196het_555dsb2_488gfpcosa1_herm1_stitched
42.5753	226.448	Pachytene	0.649821	herm	syp3het	2022_08_06_DLW196het_555dsb2_488gfpcosa1_herm1_stitched
39.6462	266.094	Pachytene	0.763591	herm	syp3het	2022_08_06_DLW196het_555dsb2_488gfpcosa1_herm1_stitched
53.3884	319.482	Pachytene	0.916797	herm	syp3het	2022_08_06_DLW196het_555dsb2_488gfpcosa1_herm1_stitched
28.9945	348.477	Pachytene	1	herm	syp3het	2022_08_06_DLW196het_555dsb2_488gfpcosa1_herm1_stitched
57.1855	57.1855	PMT	0.12939	herm	syp3het	2022_08_06_DLW196het_555dsb2_488gfpcosa1_herm2_stitched
53.8949	111.08	PMT	0.251334	herm	syp3het	2022_08_06_DLW196het_555dsb2_488gfpcosa1_herm2_stitched
16.345	127.425	PMT	0.288317	herm	syp3het	2022_08_06_DLW196het_555dsb2_488gfpcosa1_herm2_stitched
14.5203	141.946	PMT	0.321171	herm	syp3het	2022_08_06_DLW196het_555dsb2_488gfpcosa1_herm2_stitched
22.1486	164.094	Transition Zone	0.371286	herm	syp3het	2022_08_06_DLW196het_555dsb2_488gfpcosa1_herm2_stitched
27.637	191.731	Transition Zone	0.433818	herm	syp3het	2022_08_06_DLW196het_555dsb2_488gfpcosa1_herm2_stitched
50.4105	242.142	Pachytene	0.547878	herm	syp3het	2022_08_06_DLW196het_555dsb2_488gfpcosa1_herm2_stitched
40.0518	282.194	Pachytene	0.638501	herm	syp3het	2022_08_06_DLW196het_555dsb2_488gfpcosa1_herm2_stitched
37.1054	319.299	Pachytene	0.722457	herm	syp3het	2022_08_06_DLW196het_555dsb2_488gfpcosa1_herm2_stitched
17.7246	337.023	Pachytene	0.762561	herm	syp3het	2022_08_06_DLW196het_555dsb2_488gfpcosa1_herm2_stitched
13.6636	350.687	Pachytene	0.793477	herm	syp3het	2022_08_06_DLW196het_555dsb2_488gfpcosa1_herm2_stitched
19.642	370.329	Pachytene	0.83792	herm	syp3het	2022_08_06_DLW196het_555dsb2_488gfpcosa1_herm2_stitched
50.2456	420.575	Pachytene	0.951607	herm	syp3het	2022_08_06_DLW196het_555dsb2_488gfpcosa1_herm2_stitched
21.3878	441.962	Pachytene	1	herm	syp3het	2022_08_06_DLW196het_555dsb2_488gfpcosa1_herm2_stitched
33.1127	33.1127	PMT	0.0958358	herm	syp3het	2022_08_06_DLW196het_555dsb2_488gfpcosa1_herm3_stitched
47.8361	80.9488	PMT	0.234285	herm	syp3het	2022_08_06_DLW196het_555dsb2_488gfpcosa1_herm3_stitched
16.4773	97.4261	Transition Zone	0.281974	herm	syp3het	2022_08_06_DLW196het_555dsb2_488gfpcosa1_herm3_stitched
12.1201	109.546	Transition Zone	0.317052	herm	syp3het	2022_08_06_DLW196het_555dsb2_488gfpcosa1_herm3_stitched
32.3782	141.924	Pachytene	0.410763	herm	syp3het	2022_08_06_DLW196het_555dsb2_488gfpcosa1_herm3_stitched
50.6649	192.589	Pachytene	0.557399	herm	syp3het	2022_08_06_DLW196het_555dsb2_488gfpcosa1_herm3_stitched
47.5322	240.122	Pachytene	0.694968	herm	syp3het	2022_08_06_DLW196het_555dsb2_488gfpcosa1_herm3_stitched
64.1217	304.243	Pachytene	0.880551	herm	syp3het	2022_08_06_DLW196het_555dsb2_488gfpcosa1_herm3_stitched
41.2713	345.514	Pachytene	1	herm	syp3het	2022_08_06_DLW196het_555dsb2_488gfpcosa1_herm3_stitched
41.5019	41.5019	PMT	0.120679	herm	syp3het	2022_08_06_DLW196het_555dsb2_488gfpcosa1_herm4_stitched
24.3789	65.8808	PMT	0.191567	herm	syp3het	2022_08_06_DLW196het_555dsb2_488gfpcosa1_herm4_stitched
11.2118	77.0927	PMT	0.224169	herm	syp3het	2022_08_06_DLW196het_555dsb2_488gfpcosa1_herm4_stitched
18.1714	95.264	PMT	0.277008	herm	syp3het	2022_08_06_DLW196het_555dsb2_488gfpcosa1_herm4_stitched
18.2626	113.527	Transition Zone	0.330111	herm	syp3het	2022_08_06_DLW196het_555dsb2_488gfpcosa1_herm4_stitched
16.3956	129.922	Transition Zone	0.377786	herm	syp3het	2022_08_06_DLW196het_555dsb2_488gfpcosa1_herm4_stitched
29.0959	159.018	Pachytene	0.462391	herm	syp3het	2022_08_06_DLW196het_555dsb2_488gfpcosa1_herm4_stitched
106.422	265.44	Pachytene	0.771842	herm	syp3het	2022_08_06_DLW196het_555dsb2_488gfpcosa1_herm4_stitched
11.7353	277.175	Pachytene	0.805966	herm	syp3het	2022_08_06_DLW196het_555dsb2_488gfpcosa1_herm4_stitched
11.6924	288.867	Pachytene	0.839965	herm	syp3het	2022_08_06_DLW196het_555dsb2_488gfpcosa1_herm4_stitched
55.0366	343.904	Pachytene	1	herm	syp3het	2022_08_06_DLW196het_555dsb2_488gfpcosa1_herm4_stitched
