# Supplementary material for: Sexual dimorphic regulation of recombination by the synaptonemal complex in C. elegans
Source: eLife journal article supplement (doi:10.7554/elife.84538), 2023-10-05
Supplement: supp [file Figure 4 - figure supplement 1 source data SUN-1 S8P.xlsx]

## Sheet: Sheet1
Explanation of the column identifiers: (1) Length shows the length between individual measured segments; (2) cum_length is the progressive cumulative length of the segments in one germline; (3) SUN1S8P_staining displays the categories of SUN-1 S8P staining: staining was present (SUN1), last nucleus with SUN1 (SUN1_stragler), and end of pachytene (END); (4) length_normd is the normalized germline …
length	cum_length	SUN1S8P_stain	length_normd	Sex	Genotype	image_name
48.4224	48.4224	None	0.177796	herm	syp2het	2023_03_24_DLW188het_herm1_555sun1S8P_488syp1_dapi_stitched
123.736	172.158	SUN1	0.632125	herm	syp2het	2023_03_24_DLW188het_herm1_555sun1S8P_488syp1_dapi_stitched
49.4599	221.618	SUN1_stragler	0.81373	herm	syp2het	2023_03_24_DLW188het_herm1_555sun1S8P_488syp1_dapi_stitched
50.7302	272.348	End	1	herm	syp2het	2023_03_24_DLW188het_herm1_555sun1S8P_488syp1_dapi_stitched
62.1008	62.1008	None	0.148431	male	syp2het	2023_03_24_DLW188het_male1_555sun1S8P_488syp1_dapi_stitched
22.1653	84.2661	None	0.201409	male	syp2het	2023_03_24_DLW188het_male1_555sun1S8P_488syp1_dapi_stitched
27.5164	111.782	None	0.267178	male	syp2het	2023_03_24_DLW188het_male1_555sun1S8P_488syp1_dapi_stitched
17.7576	129.54	None	0.309621	male	syp2het	2023_03_24_DLW188het_male1_555sun1S8P_488syp1_dapi_stitched
6.55708	136.097	None	0.325294	male	syp2het	2023_03_24_DLW188het_male1_555sun1S8P_488syp1_dapi_stitched
36.6021	172.699	SUN1	0.412778	male	syp2het	2023_03_24_DLW188het_male1_555sun1S8P_488syp1_dapi_stitched
34.2368	206.936	SUN1	0.49461	male	syp2het	2023_03_24_DLW188het_male1_555sun1S8P_488syp1_dapi_stitched
10.572	217.508	SUN1	0.519878	male	syp2het	2023_03_24_DLW188het_male1_555sun1S8P_488syp1_dapi_stitched
11.5556	229.064	SUN1	0.547498	male	syp2het	2023_03_24_DLW188het_male1_555sun1S8P_488syp1_dapi_stitched
43.1788	272.242	SUN1	0.650702	male	syp2het	2023_03_24_DLW188het_male1_555sun1S8P_488syp1_dapi_stitched
15.2762	287.519	SUN1	0.687215	male	syp2het	2023_03_24_DLW188het_male1_555sun1S8P_488syp1_dapi_stitched
27.0085	314.527	SUN1_stragler	0.751769	male	syp2het	2023_03_24_DLW188het_male1_555sun1S8P_488syp1_dapi_stitched
28.6688	343.196	SUN1_stragler	0.820292	male	syp2het	2023_03_24_DLW188het_male1_555sun1S8P_488syp1_dapi_stitched
17.4781	360.674	SUN1_stragler	0.862068	male	syp2het	2023_03_24_DLW188het_male1_555sun1S8P_488syp1_dapi_stitched
34.3521	395.026	End	0.944175	male	syp2het	2023_03_24_DLW188het_male1_555sun1S8P_488syp1_dapi_stitched
23.3564	418.383	End	1	male	syp2het	2023_03_24_DLW188het_male1_555sun1S8P_488syp1_dapi_stitched
47.6897	47.6897	None	0.142926	male	syp2het	2023_03_24_DLW188het_male2_555sun1S8P_488syp1_dapi_stitched
20.0536	67.7433	None	0.203027	male	syp2het	2023_03_24_DLW188het_male2_555sun1S8P_488syp1_dapi_stitched
28.6603	96.4036	None	0.288922	male	syp2het	2023_03_24_DLW188het_male2_555sun1S8P_488syp1_dapi_stitched
15.0296	111.433	None	0.333966	male	syp2het	2023_03_24_DLW188het_male2_555sun1S8P_488syp1_dapi_stitched
19.6382	131.071	SUN1	0.392822	male	syp2het	2023_03_24_DLW188het_male2_555sun1S8P_488syp1_dapi_stitched
13.0341	144.105	SUN1	0.431885	male	syp2het	2023_03_24_DLW188het_male2_555sun1S8P_488syp1_dapi_stitched
11.1296	155.235	SUN1	0.46524	male	syp2het	2023_03_24_DLW188het_male2_555sun1S8P_488syp1_dapi_stitched
15.6533	170.888	SUN1	0.512154	male	syp2het	2023_03_24_DLW188het_male2_555sun1S8P_488syp1_dapi_stitched
22.0514	192.94	SUN1	0.578242	male	syp2het	2023_03_24_DLW188het_male2_555sun1S8P_488syp1_dapi_stitched
7.95643	200.896	SUN1	0.602087	male	syp2het	2023_03_24_DLW188het_male2_555sun1S8P_488syp1_dapi_stitched
41.1246	242.021	SUN1_stragler	0.725338	male	syp2het	2023_03_24_DLW188het_male2_555sun1S8P_488syp1_dapi_stitched
45.7643	287.785	End	0.862494	male	syp2het	2023_03_24_DLW188het_male2_555sun1S8P_488syp1_dapi_stitched
29.3476	317.133	End	0.950449	male	syp2het	2023_03_24_DLW188het_male2_555sun1S8P_488syp1_dapi_stitched
16.5336	333.666	End	1	male	syp2het	2023_03_24_DLW188het_male2_555sun1S8P_488syp1_dapi_stitched
47.3093	47.3093	None	0.14999	male	syp2het	2023_03_24_DLW188het_male3_555sun1S8P_488syp1_dapi_stitched
25.0288	72.3381	None	0.229341	male	syp2het	2023_03_24_DLW188het_male3_555sun1S8P_488syp1_dapi_stitched
24.7768	97.1149	None	0.307894	male	syp2het	2023_03_24_DLW188het_male3_555sun1S8P_488syp1_dapi_stitched
15.291	112.406	None	0.356373	male	syp2het	2023_03_24_DLW188het_male3_555sun1S8P_488syp1_dapi_stitched
8.70692	121.113	None	0.383977	male	syp2het	2023_03_24_DLW188het_male3_555sun1S8P_488syp1_dapi_stitched
8.96761	130.08	SUN1	0.412408	male	syp2het	2023_03_24_DLW188het_male3_555sun1S8P_488syp1_dapi_stitched
7.7552	137.836	SUN1	0.436995	male	syp2het	2023_03_24_DLW188het_male3_555sun1S8P_488syp1_dapi_stitched
8.04135	145.877	SUN1	0.46249	male	syp2het	2023_03_24_DLW188het_male3_555sun1S8P_488syp1_dapi_stitched
13.2021	159.079	SUN1	0.504346	male	syp2het	2023_03_24_DLW188het_male3_555sun1S8P_488syp1_dapi_stitched
16.4939	175.573	SUN1	0.556638	male	syp2het	2023_03_24_DLW188het_male3_555sun1S8P_488syp1_dapi_stitched
21.9454	197.518	SUN1	0.626214	male	syp2het	2023_03_24_DLW188het_male3_555sun1S8P_488syp1_dapi_stitched
42.5826	240.101	SUN1	0.761218	male	syp2het	2023_03_24_DLW188het_male3_555sun1S8P_488syp1_dapi_stitched
12.1793	252.28	SUN1_stragler	0.799831	male	syp2het	2023_03_24_DLW188het_male3_555sun1S8P_488syp1_dapi_stitched
32.9039	285.184	End	0.90415	male	syp2het	2023_03_24_DLW188het_male3_555sun1S8P_488syp1_dapi_stitched
30.2326	315.417	End	1	male	syp2het	2023_03_24_DLW188het_male3_555sun1S8P_488syp1_dapi_stitched
56.5349	56.5349	None	0.136971	male	syp2het	2023_03_24_DLW188het_male4_555sun1S8P_488syp1_dapi_stitched
40.4656	97.0005	None	0.23501	male	syp2het	2023_03_24_DLW188het_male4_555sun1S8P_488syp1_dapi_stitched
26.0034	123.004	None	0.298011	male	syp2het	2023_03_24_DLW188het_male4_555sun1S8P_488syp1_dapi_stitched
15.786	138.79	None	0.336256	male	syp2het	2023_03_24_DLW188het_male4_555sun1S8P_488syp1_dapi_stitched
42.2392	181.029	SUN1	0.438593	male	syp2het	2023_03_24_DLW188het_male4_555sun1S8P_488syp1_dapi_stitched
37.9258	218.955	SUN1	0.530478	male	syp2het	2023_03_24_DLW188het_male4_555sun1S8P_488syp1_dapi_stitched
25.7305	244.685	SUN1	0.592817	male	syp2het	2023_03_24_DLW188het_male4_555sun1S8P_488syp1_dapi_stitched
26.7467	271.432	SUN1	0.657618	male	syp2het	2023_03_24_DLW188het_male4_555sun1S8P_488syp1_dapi_stitched
14.7944	286.226	SUN1	0.693462	male	syp2het	2023_03_24_DLW188het_male4_555sun1S8P_488syp1_dapi_stitched
14.7133	300.94	SUN1_stragler	0.729109	male	syp2het	2023_03_24_DLW188het_male4_555sun1S8P_488syp1_dapi_stitched
8.35494	309.295	SUN1_stragler	0.749351	male	syp2het	2023_03_24_DLW188het_male4_555sun1S8P_488syp1_dapi_stitched
13.2564	322.551	End	0.781469	male	syp2het	2023_03_24_DLW188het_male4_555sun1S8P_488syp1_dapi_stitched
3.24747	325.799	End	0.789337	male	syp2het	2023_03_24_DLW188het_male4_555sun1S8P_488syp1_dapi_stitched
25.8397	351.638	End	0.85194	male	syp2het	2023_03_24_DLW188het_male4_555sun1S8P_488syp1_dapi_stitched
8.20794	359.846	End	0.871826	male	syp2het	2023_03_24_DLW188het_male4_555sun1S8P_488syp1_dapi_stitched
31.853	391.699	End	0.948999	male	syp2het	2023_03_24_DLW188het_male4_555sun1S8P_488syp1_dapi_stitched
21.0506	412.75	End	1	male	syp2het	2023_03_24_DLW188het_male4_555sun1S8P_488syp1_dapi_stitched
91.4392	91.4392	None	0.216705	male	syp2het	2023_03_24_DLW188het_male5_555sun1S8P_488syp1_dapi_stitched
39.429	130.868	None	0.31015	male	syp2het	2023_03_24_DLW188het_male5_555sun1S8P_488syp1_dapi_stitched
16.4869	147.355	None	0.349223	male	syp2het	2023_03_24_DLW188het_male5_555sun1S8P_488syp1_dapi_stitched
10.6889	158.044	SUN1	0.374555	male	syp2het	2023_03_24_DLW188het_male5_555sun1S8P_488syp1_dapi_stitched
20.4584	178.502	SUN1	0.42304	male	syp2het	2023_03_24_DLW188het_male5_555sun1S8P_488syp1_dapi_stitched
22.9191	201.421	SUN1	0.477357	male	syp2het	2023_03_24_DLW188het_male5_555sun1S8P_488syp1_dapi_stitched
5.34251	206.764	SUN1	0.490018	male	syp2het	2023_03_24_DLW188het_male5_555sun1S8P_488syp1_dapi_stitched
16.9558	223.72	SUN1	0.530202	male	syp2het	2023_03_24_DLW188het_male5_555sun1S8P_488syp1_dapi_stitched
24.5737	248.293	SUN1	0.588441	male	syp2het	2023_03_24_DLW188het_male5_555sun1S8P_488syp1_dapi_stitched
26.9158	275.209	SUN1	0.652229	male	syp2het	2023_03_24_DLW188het_male5_555sun1S8P_488syp1_dapi_stitched
37.9457	313.155	SUN1	0.742159	male	syp2het	2023_03_24_DLW188het_male5_555sun1S8P_488syp1_dapi_stitched
5.74895	318.904	SUN1_stragler	0.755783	male	syp2het	2023_03_24_DLW188het_male5_555sun1S8P_488syp1_dapi_stitched
45.9096	364.814	End	0.864586	male	syp2het	2023_03_24_DLW188het_male5_555sun1S8P_488syp1_dapi_stitched
32.4274	397.241	End	0.941437	male	syp2het	2023_03_24_DLW188het_male5_555sun1S8P_488syp1_dapi_stitched
16.805	414.046	End	0.981264	male	syp2het	2023_03_24_DLW188het_male5_555sun1S8P_488syp1_dapi_stitched
7.9056	421.951	End	1	male	syp2het	2023_03_24_DLW188het_male5_555sun1S8P_488syp1_dapi_stitched
36.2423	36.2423	None	0.144447	male	syp2het	2023_03_24_DLW188het_male6_555sun1S8P_488syp1_dapi_stitched
22.8735	59.1157	None	0.235611	male	syp2het	2023_03_24_DLW188het_male6_555sun1S8P_488syp1_dapi_stitched
43.4598	102.575	SUN1	0.408823	male	syp2het	2023_03_24_DLW188het_male6_555sun1S8P_488syp1_dapi_stitched
28.3577	130.933	SUN1	0.521845	male	syp2het	2023_03_24_DLW188het_male6_555sun1S8P_488syp1_dapi_stitched
22.215	153.148	SUN1	0.610385	male	syp2het	2023_03_24_DLW188het_male6_555sun1S8P_488syp1_dapi_stitched
6.18456	159.333	SUN1	0.635034	male	syp2het	2023_03_24_DLW188het_male6_555sun1S8P_488syp1_dapi_stitched
9.17336	168.506	SUN1_stragler	0.671595	male	syp2het	2023_03_24_DLW188het_male6_555sun1S8P_488syp1_dapi_stitched
10.6344	179.141	SUN1_stragler	0.713979	male	syp2het	2023_03_24_DLW188het_male6_555sun1S8P_488syp1_dapi_stitched
11.1931	190.334	End	0.75859	male	syp2het	2023_03_24_DLW188het_male6_555sun1S8P_488syp1_dapi_stitched
9.63634	199.97	End	0.796997	male	syp2het	2023_03_24_DLW188het_male6_555sun1S8P_488syp1_dapi_stitched
50.9344	250.904	End	1	male	syp2het	2023_03_24_DLW188het_male6_555sun1S8P_488syp1_dapi_stitched
78.8857	78.8857	None	0.228931	herm	syp3het	2023_03_24_DLW190het_herm1_555sun1S8P_488syp1_dapi_stitched
78.7326	157.618	SUN1	0.457417	herm	syp3het	2023_03_24_DLW190het_herm1_555sun1S8P_488syp1_dapi_stitched
65.7886	223.407	SUN1	0.648339	herm	syp3het	2023_03_24_DLW190het_herm1_555sun1S8P_488syp1_dapi_stitched
37.4512	260.858	SUN1_stragler	0.757025	herm	syp3het	2023_03_24_DLW190het_herm1_555sun1S8P_488syp1_dapi_stitched
31.1333	291.991	SUN1_stragler	0.847376	herm	syp3het	2023_03_24_DLW190het_herm1_555sun1S8P_488syp1_dapi_stitched
52.5918	344.583	End	1	herm	syp3het	2023_03_24_DLW190het_herm1_555sun1S8P_488syp1_dapi_stitched
70.3619	70.3619	None	0.175365	herm	syp3het	2023_03_24_DLW190het_herm2_555sun1S8P_488syp1_dapi_stitched
58.0626	128.425	None	0.320076	herm	syp3het	2023_03_24_DLW190het_herm2_555sun1S8P_488syp1_dapi_stitched
58.6944	187.119	SUN1	0.466361	herm	syp3het	2023_03_24_DLW190het_herm2_555sun1S8P_488syp1_dapi_stitched
86.6324	273.751	SUN1	0.682277	herm	syp3het	2023_03_24_DLW190het_herm2_555sun1S8P_488syp1_dapi_stitched
66.7608	340.512	SUN1_stragler	0.848666	herm	syp3het	2023_03_24_DLW190het_herm2_555sun1S8P_488syp1_dapi_stitched
60.7199	401.232	End	1	herm	syp3het	2023_03_24_DLW190het_herm2_555sun1S8P_488syp1_dapi_stitched
82.4066	82.4066	None	0.261252	herm	syp3het	2023_03_24_DLW190het_herm5_555sun1S8P_488syp1_dapi_stitched
71.1699	153.576	SUN1	0.486881	herm	syp3het	2023_03_24_DLW190het_herm5_555sun1S8P_488syp1_dapi_stitched
69.275	222.851	SUN1	0.706503	herm	syp3het	2023_03_24_DLW190het_herm5_555sun1S8P_488syp1_dapi_stitched
34.0398	256.891	SUN1_stragler	0.814418	herm	syp3het	2023_03_24_DLW190het_herm5_555sun1S8P_488syp1_dapi_stitched
15.9405	272.832	End	0.864954	herm	syp3het	2023_03_24_DLW190het_herm5_555sun1S8P_488syp1_dapi_stitched
42.5974	315.429	End	1	herm	syp3het	2023_03_24_DLW190het_herm5_555sun1S8P_488syp1_dapi_stitched
47.7767	47.7767	None	0.13071	herm	syp3het	2023_03_24_DLW190het_herm6_555sun1S8P_488syp1_dapi_stitched
58.1893	105.966	None	0.289907	herm	syp3het	2023_03_24_DLW190het_herm6_555sun1S8P_488syp1_dapi_stitched
93.283	199.249	SUN1	0.545115	herm	syp3het	2023_03_24_DLW190het_herm6_555sun1S8P_488syp1_dapi_stitched
43.9216	243.171	SUN1	0.665278	herm	syp3het	2023_03_24_DLW190het_herm6_555sun1S8P_488syp1_dapi_stitched
28.4243	271.595	SUN1	0.743043	herm	syp3het	2023_03_24_DLW190het_herm6_555sun1S8P_488syp1_dapi_stitched
44.552	316.147	SUN1_stragler	0.86493	herm	syp3het	2023_03_24_DLW190het_herm6_555sun1S8P_488syp1_dapi_stitched
49.3704	365.517	End	1	herm	syp3het	2023_03_24_DLW190het_herm6_555sun1S8P_488syp1_dapi_stitched
54.2203	54.2203	None	0.159503	herm	syp3het	2023_03_24_DLW190het_herm7_555sun1S8P_488syp1_dapi_stitched
36.4824	90.7028	None	0.266825	herm	syp3het	2023_03_24_DLW190het_herm7_555sun1S8P_488syp1_dapi_stitched
161.681	252.384	SUN1	0.742451	herm	syp3het	2023_03_24_DLW190het_herm7_555sun1S8P_488syp1_dapi_stitched
43.4356	295.82	SUN1_stragler	0.870227	herm	syp3het	2023_03_24_DLW190het_herm7_555sun1S8P_488syp1_dapi_stitched
44.1141	339.934	End	1	herm	syp3het	2023_03_24_DLW190het_herm7_555sun1S8P_488syp1_dapi_stitched
96.8657	96.8657	None	0.239359	herm	syp3het	2023_03_24_DLW190het_herm9_555sun1S8P_488syp1_dapi_stitched
102.063	198.928	SUN1	0.49156	herm	syp3het	2023_03_24_DLW190het_herm9_555sun1S8P_488syp1_dapi_stitched
70.7292	269.658	SUN1	0.666334	herm	syp3het	2023_03_24_DLW190het_herm9_555sun1S8P_488syp1_dapi_stitched
42.8876	312.545	SUN1_stragler	0.772311	herm	syp3het	2023_03_24_DLW190het_herm9_555sun1S8P_488syp1_dapi_stitched
28.6008	341.146	SUN1_stragler	0.842985	herm	syp3het	2023_03_24_DLW190het_herm9_555sun1S8P_488syp1_dapi_stitched
58.4949	399.641	End	0.987528	herm	syp3het	2023_03_24_DLW190het_herm9_555sun1S8P_488syp1_dapi_stitched
5.04725	404.688	End	1	herm	syp3het	2023_03_24_DLW190het_herm9_555sun1S8P_488syp1_dapi_stitched
104.922	104.922	None	0.289271	herm	syp3het	2023_03_24_DLW190het_herm10_555sun1S8P_488syp1_dapi_stitched
78.4446	183.366	SUN1	0.505543	herm	syp3het	2023_03_24_DLW190het_herm10_555sun1S8P_488syp1_dapi_stitched
52.9372	236.303	SUN1	0.651492	herm	syp3het	2023_03_24_DLW190het_herm10_555sun1S8P_488syp1_dapi_stitched
35.2038	271.507	SUN1	0.748549	herm	syp3het	2023_03_24_DLW190het_herm10_555sun1S8P_488syp1_dapi_stitched
24.2433	295.751	SUN1_stragler	0.815388	herm	syp3het	2023_03_24_DLW190het_herm10_555sun1S8P_488syp1_dapi_stitched
66.9607	362.711	End	1	herm	syp3het	2023_03_24_DLW190het_herm10_555sun1S8P_488syp1_dapi_stitched
83.2965	83.2965	None	0.249768	herm	syp3het	2023_03_24_DLW190het_herm11_555sun1S8P_488syp1_dapi_stitched
185.426	268.722	SUN1	0.805774	herm	syp3het	2023_03_24_DLW190het_herm11_555sun1S8P_488syp1_dapi_stitched
29.1392	297.862	SUN1_stragler	0.893149	herm	syp3het	2023_03_24_DLW190het_herm11_555sun1S8P_488syp1_dapi_stitched
35.6343	333.496	End	1	herm	syp3het	2023_03_24_DLW190het_herm11_555sun1S8P_488syp1_dapi_stitched
80.3405	80.3405	None	0.226118	herm	syp3het	2023_03_24_DLW190het_herm12_555sun1S8P_488syp1_dapi_stitched
95.2385	175.579	SUN1	0.494167	herm	syp3het	2023_03_24_DLW190het_herm12_555sun1S8P_488syp1_dapi_stitched
53.4371	229.016	SUN1	0.644566	herm	syp3het	2023_03_24_DLW190het_herm12_555sun1S8P_488syp1_dapi_stitched
30.9786	259.995	SUN1_stragler	0.731755	herm	syp3het	2023_03_24_DLW190het_herm12_555sun1S8P_488syp1_dapi_stitched
95.3082	355.303	End	1	herm	syp3het	2023_03_24_DLW190het_herm12_555sun1S8P_488syp1_dapi_stitched
65.3117	65.3117	None	0.190802	herm	syp3het	2023_03_24_DLW190het_herm13_555sun1S8P_488syp1_dapi_stitched
33.813	99.1247	None	0.289583	herm	syp3het	2023_03_24_DLW190het_herm13_555sun1S8P_488syp1_dapi_stitched
148.707	247.832	SUN1	0.724017	herm	syp3het	2023_03_24_DLW190het_herm13_555sun1S8P_488syp1_dapi_stitched
29.3721	277.204	SUN1_stragler	0.809824	herm	syp3het	2023_03_24_DLW190het_herm13_555sun1S8P_488syp1_dapi_stitched
65.0973	342.301	End	1	herm	syp3het	2023_03_24_DLW190het_herm13_555sun1S8P_488syp1_dapi_stitched
23.7694	23.7694	None	0.0607451	male	syp3het	2023_03_24_DLW190het_male1_555sun1S8P_488syp1_dapi_stitched
40.2855	64.0549	None	0.163699	male	syp3het	2023_03_24_DLW190het_male1_555sun1S8P_488syp1_dapi_stitched
42.1834	106.238	None	0.271503	male	syp3het	2023_03_24_DLW190het_male1_555sun1S8P_488syp1_dapi_stitched
21.4947	127.733	None	0.326435	male	syp3het	2023_03_24_DLW190het_male1_555sun1S8P_488syp1_dapi_stitched
50.2504	177.983	SUN1	0.454855	male	syp3het	2023_03_24_DLW190het_male1_555sun1S8P_488syp1_dapi_stitched
33.6555	211.639	SUN1	0.540865	male	syp3het	2023_03_24_DLW190het_male1_555sun1S8P_488syp1_dapi_stitched
16.1524	227.791	SUN1	0.582144	male	syp3het	2023_03_24_DLW190het_male1_555sun1S8P_488syp1_dapi_stitched
20.5471	248.338	SUN1	0.634655	male	syp3het	2023_03_24_DLW190het_male1_555sun1S8P_488syp1_dapi_stitched
18.8695	267.208	SUN1	0.682878	male	syp3het	2023_03_24_DLW190het_male1_555sun1S8P_488syp1_dapi_stitched
10.5326	277.741	SUN1_stragler	0.709795	male	syp3het	2023_03_24_DLW190het_male1_555sun1S8P_488syp1_dapi_stitched
36.3186	314.059	End	0.80261	male	syp3het	2023_03_24_DLW190het_male1_555sun1S8P_488syp1_dapi_stitched
51.0589	365.118	End	0.933097	male	syp3het	2023_03_24_DLW190het_male1_555sun1S8P_488syp1_dapi_stitched
26.179	391.297	End	1	male	syp3het	2023_03_24_DLW190het_male1_555sun1S8P_488syp1_dapi_stitched
53.4066	53.4066	None	0.13391	male	syp3het	2023_03_24_DLW190het_male2_555sun1S8P_488syp1_dapi_stitched
44.6432	98.0499	None	0.245847	male	syp3het	2023_03_24_DLW190het_male2_555sun1S8P_488syp1_dapi_stitched
20.5722	118.622	None	0.297429	male	syp3het	2023_03_24_DLW190het_male2_555sun1S8P_488syp1_dapi_stitched
33.7694	152.392	SUN1	0.382101	male	syp3het	2023_03_24_DLW190het_male2_555sun1S8P_488syp1_dapi_stitched
22.8565	175.248	SUN1	0.439411	male	syp3het	2023_03_24_DLW190het_male2_555sun1S8P_488syp1_dapi_stitched
21.6107	196.859	SUN1	0.493597	male	syp3het	2023_03_24_DLW190het_male2_555sun1S8P_488syp1_dapi_stitched
19.9051	216.764	SUN1	0.543506	male	syp3het	2023_03_24_DLW190het_male2_555sun1S8P_488syp1_dapi_stitched
15.1551	231.919	SUN1	0.581505	male	syp3het	2023_03_24_DLW190het_male2_555sun1S8P_488syp1_dapi_stitched
34.779	266.698	SUN1	0.668709	male	syp3het	2023_03_24_DLW190het_male2_555sun1S8P_488syp1_dapi_stitched
25.0937	291.792	SUN1_stragler	0.731628	male	syp3het	2023_03_24_DLW190het_male2_555sun1S8P_488syp1_dapi_stitched
28.5079	320.3	End	0.803108	male	syp3het	2023_03_24_DLW190het_male2_555sun1S8P_488syp1_dapi_stitched
32.2491	352.549	End	0.883968	male	syp3het	2023_03_24_DLW190het_male2_555sun1S8P_488syp1_dapi_stitched
46.2766	398.825	End	1	male	syp3het	2023_03_24_DLW190het_male2_555sun1S8P_488syp1_dapi_stitched
41.9023	41.9023	None	0.096509	male	syp3het	2023_03_24_DLW190het_male3_555sun1S8P_488syp1_dapi_stitched
64.8286	106.731	None	0.245822	male	syp3het	2023_03_24_DLW190het_male3_555sun1S8P_488syp1_dapi_stitched
55.0342	161.765	SUN1	0.372576	male	syp3het	2023_03_24_DLW190het_male3_555sun1S8P_488syp1_dapi_stitched
45.809	207.574	SUN1	0.478083	male	syp3het	2023_03_24_DLW190het_male3_555sun1S8P_488syp1_dapi_stitched
37.8966	245.471	SUN1	0.565366	male	syp3het	2023_03_24_DLW190het_male3_555sun1S8P_488syp1_dapi_stitched
24.5639	270.035	SUN1	0.621942	male	syp3het	2023_03_24_DLW190het_male3_555sun1S8P_488syp1_dapi_stitched
6.97315	277.008	SUN1_stragler	0.638002	male	syp3het	2023_03_24_DLW190het_male3_555sun1S8P_488syp1_dapi_stitched
34.3513	311.359	End	0.71712	male	syp3het	2023_03_24_DLW190het_male3_555sun1S8P_488syp1_dapi_stitched
16.9744	328.333	End	0.756215	male	syp3het	2023_03_24_DLW190het_male3_555sun1S8P_488syp1_dapi_stitched
32.8599	361.193	End	0.831898	male	syp3het	2023_03_24_DLW190het_male3_555sun1S8P_488syp1_dapi_stitched
29.0252	390.218	End	0.898748	male	syp3het	2023_03_24_DLW190het_male3_555sun1S8P_488syp1_dapi_stitched
16.3039	406.522	End	0.9363	male	syp3het	2023_03_24_DLW190het_male3_555sun1S8P_488syp1_dapi_stitched
27.6574	434.18	End	1	male	syp3het	2023_03_24_DLW190het_male3_555sun1S8P_488syp1_dapi_stitched
65.0607	65.0607	None	0.166031	male	syp3het	2023_03_24_DLW190het_male6_555sun1S8P_488syp1_dapi_stitched
28.466	93.5266	None	0.238674	male	syp3het	2023_03_24_DLW190het_male6_555sun1S8P_488syp1_dapi_stitched
34.6627	128.189	None	0.327131	male	syp3het	2023_03_24_DLW190het_male6_555sun1S8P_488syp1_dapi_stitched
34.0776	162.267	SUN1	0.414095	male	syp3het	2023_03_24_DLW190het_male6_555sun1S8P_488syp1_dapi_stitched
18.9932	181.26	SUN1	0.462564	male	syp3het	2023_03_24_DLW190het_male6_555sun1S8P_488syp1_dapi_stitched
16.7357	197.996	SUN1	0.505273	male	syp3het	2023_03_24_DLW190het_male6_555sun1S8P_488syp1_dapi_stitched
67.9909	265.987	SUN1	0.678782	male	syp3het	2023_03_24_DLW190het_male6_555sun1S8P_488syp1_dapi_stitched
25.5016	291.488	SUN1_stragler	0.74386	male	syp3het	2023_03_24_DLW190het_male6_555sun1S8P_488syp1_dapi_stitched
100.371	391.859	End	1	male	syp3het	2023_03_24_DLW190het_male6_555sun1S8P_488syp1_dapi_stitched
71.4884	71.4884	None	0.198444	male	syp3het	2023_03_24_DLW190het_male7_555sun1S8P_488syp1_dapi_stitched
29.0406	100.529	None	0.279057	male	syp3het	2023_03_24_DLW190het_male7_555sun1S8P_488syp1_dapi_stitched
24.0293	124.558	None	0.34576	male	syp3het	2023_03_24_DLW190het_male7_555sun1S8P_488syp1_dapi_stitched
29.0733	153.632	SUN1	0.426464	male	syp3het	2023_03_24_DLW190het_male7_555sun1S8P_488syp1_dapi_stitched
17.6634	171.295	SUN1	0.475496	male	syp3het	2023_03_24_DLW190het_male7_555sun1S8P_488syp1_dapi_stitched
19.0168	190.312	SUN1	0.528284	male	syp3het	2023_03_24_DLW190het_male7_555sun1S8P_488syp1_dapi_stitched
19.7675	210.079	SUN1	0.583157	male	syp3het	2023_03_24_DLW190het_male7_555sun1S8P_488syp1_dapi_stitched
20.2389	230.318	SUN1	0.639338	male	syp3het	2023_03_24_DLW190het_male7_555sun1S8P_488syp1_dapi_stitched
22.1989	252.517	SUN1_stragler	0.700959	male	syp3het	2023_03_24_DLW190het_male7_555sun1S8P_488syp1_dapi_stitched
55.6704	308.188	End	0.855494	male	syp3het	2023_03_24_DLW190het_male7_555sun1S8P_488syp1_dapi_stitched
23.8033	331.991	End	0.921569	male	syp3het	2023_03_24_DLW190het_male7_555sun1S8P_488syp1_dapi_stitched
16.1465	348.137	End	0.96639	male	syp3het	2023_03_24_DLW190het_male7_555sun1S8P_488syp1_dapi_stitched
12.1078	360.245	End	1	male	syp3het	2023_03_24_DLW190het_male7_555sun1S8P_488syp1_dapi_stitched
59.7026	59.7026	None	0.146718	male	syp3het	2023_03_24_DLW190het_male8_555sun1S8P_488syp1_dapi_stitched
19.7839	79.4865	None	0.195337	male	syp3het	2023_03_24_DLW190het_male8_555sun1S8P_488syp1_dapi_stitched
44.0693	123.556	None	0.303636	male	syp3het	2023_03_24_DLW190het_male8_555sun1S8P_488syp1_dapi_stitched
16.8135	140.369	SUN1	0.344955	male	syp3het	2023_03_24_DLW190het_male8_555sun1S8P_488syp1_dapi_stitched
59.4496	199.819	SUN1	0.491051	male	syp3het	2023_03_24_DLW190het_male8_555sun1S8P_488syp1_dapi_stitched
16.4298	216.249	SUN1	0.531427	male	syp3het	2023_03_24_DLW190het_male8_555sun1S8P_488syp1_dapi_stitched
13.1306	229.379	SUN1	0.563695	male	syp3het	2023_03_24_DLW190het_male8_555sun1S8P_488syp1_dapi_stitched
6.14691	235.526	SUN1	0.578801	male	syp3het	2023_03_24_DLW190het_male8_555sun1S8P_488syp1_dapi_stitched
11.9211	247.447	SUN1	0.608096	male	syp3het	2023_03_24_DLW190het_male8_555sun1S8P_488syp1_dapi_stitched
14.0103	261.457	SUN1	0.642526	male	syp3het	2023_03_24_DLW190het_male8_555sun1S8P_488syp1_dapi_stitched
44.8242	306.282	SUN1	0.752681	male	syp3het	2023_03_24_DLW190het_male8_555sun1S8P_488syp1_dapi_stitched
21.7871	328.069	SUN1_stragler	0.806222	male	syp3het	2023_03_24_DLW190het_male8_555sun1S8P_488syp1_dapi_stitched
13.84	341.909	SUN1_stragler	0.840234	male	syp3het	2023_03_24_DLW190het_male8_555sun1S8P_488syp1_dapi_stitched
14.2053	356.114	SUN1_stragler	0.875143	male	syp3het	2023_03_24_DLW190het_male8_555sun1S8P_488syp1_dapi_stitched
16.319	372.433	SUN1_stragler	0.915247	male	syp3het	2023_03_24_DLW190het_male8_555sun1S8P_488syp1_dapi_stitched
34.4879	406.921	End	1	male	syp3het	2023_03_24_DLW190het_male8_555sun1S8P_488syp1_dapi_stitched
46.8114	46.8114	None	0.133725	male	syp3het	2023_03_24_DLW190het_male9_555sun1S8P_488syp1_dapi_stitched
38.4176	85.229	None	0.243473	male	syp3het	2023_03_24_DLW190het_male9_555sun1S8P_488syp1_dapi_stitched
52.6856	137.915	None	0.393979	male	syp3het	2023_03_24_DLW190het_male9_555sun1S8P_488syp1_dapi_stitched
15.2152	153.13	SUN1	0.437444	male	syp3het	2023_03_24_DLW190het_male9_555sun1S8P_488syp1_dapi_stitched
11.0935	164.223	SUN1	0.469135	male	syp3het	2023_03_24_DLW190het_male9_555sun1S8P_488syp1_dapi_stitched
13.6436	177.867	SUN1	0.50811	male	syp3het	2023_03_24_DLW190het_male9_555sun1S8P_488syp1_dapi_stitched
13.9001	191.767	SUN1	0.547819	male	syp3het	2023_03_24_DLW190het_male9_555sun1S8P_488syp1_dapi_stitched
13.2851	205.052	SUN1	0.58577	male	syp3het	2023_03_24_DLW190het_male9_555sun1S8P_488syp1_dapi_stitched
29.2253	234.277	SUN1	0.669257	male	syp3het	2023_03_24_DLW190het_male9_555sun1S8P_488syp1_dapi_stitched
3.91814	238.196	SUN1_stragler	0.68045	male	syp3het	2023_03_24_DLW190het_male9_555sun1S8P_488syp1_dapi_stitched
24.0496	262.245	End	0.749152	male	syp3het	2023_03_24_DLW190het_male9_555sun1S8P_488syp1_dapi_stitched
34.0885	296.334	End	0.846533	male	syp3het	2023_03_24_DLW190het_male9_555sun1S8P_488syp1_dapi_stitched
34.0542	330.388	End	0.943815	male	syp3het	2023_03_24_DLW190het_male9_555sun1S8P_488syp1_dapi_stitched
19.668	350.056	End	1	male	syp3het	2023_03_24_DLW190het_male9_555sun1S8P_488syp1_dapi_stitched
60.4286	60.4286	None	0.150255	male	syp3het	2023_03_24_DLW190het_male10_555sun1S8P_488syp1_dapi_stitched
48.3317	108.76	None	0.270431	male	syp3het	2023_03_24_DLW190het_male10_555sun1S8P_488syp1_dapi_stitched
15.4325	124.193	None	0.308803	male	syp3het	2023_03_24_DLW190het_male10_555sun1S8P_488syp1_dapi_stitched
14.5639	138.757	None	0.345016	male	syp3het	2023_03_24_DLW190het_male10_555sun1S8P_488syp1_dapi_stitched
12.0276	150.784	None	0.374922	male	syp3het	2023_03_24_DLW190het_male10_555sun1S8P_488syp1_dapi_stitched
44.3531	195.137	SUN1	0.485205	male	syp3het	2023_03_24_DLW190het_male10_555sun1S8P_488syp1_dapi_stitched
31.5964	226.734	SUN1	0.563769	male	syp3het	2023_03_24_DLW190het_male10_555sun1S8P_488syp1_dapi_stitched
17.8385	244.572	SUN1	0.608124	male	syp3het	2023_03_24_DLW190het_male10_555sun1S8P_488syp1_dapi_stitched
11.1646	255.737	SUN1	0.635885	male	syp3het	2023_03_24_DLW190het_male10_555sun1S8P_488syp1_dapi_stitched
21.3783	277.115	SUN1	0.689042	male	syp3het	2023_03_24_DLW190het_male10_555sun1S8P_488syp1_dapi_stitched
19.1716	296.287	SUN1_stragler	0.736712	male	syp3het	2023_03_24_DLW190het_male10_555sun1S8P_488syp1_dapi_stitched
55.3376	351.624	End	0.874308	male	syp3het	2023_03_24_DLW190het_male10_555sun1S8P_488syp1_dapi_stitched
20.9523	372.577	End	0.926405	male	syp3het	2023_03_24_DLW190het_male10_555sun1S8P_488syp1_dapi_stitched
29.598	402.175	End	1	male	syp3het	2023_03_24_DLW190het_male10_555sun1S8P_488syp1_dapi_stitched
56.1508	56.1508	None	0.145223	male	syp3het	2023_03_24_DLW190het_male11_555sun1S8P_488syp1_dapi_stitched
10.985	67.1358	None	0.173634	male	syp3het	2023_03_24_DLW190het_male11_555sun1S8P_488syp1_dapi_stitched
17.3716	84.5074	None	0.218562	male	syp3het	2023_03_24_DLW190het_male11_555sun1S8P_488syp1_dapi_stitched
20.4737	104.981	None	0.271513	male	syp3het	2023_03_24_DLW190het_male11_555sun1S8P_488syp1_dapi_stitched
20.3074	125.289	None	0.324034	male	syp3het	2023_03_24_DLW190het_male11_555sun1S8P_488syp1_dapi_stitched
27.725	153.014	SUN1	0.395739	male	syp3het	2023_03_24_DLW190het_male11_555sun1S8P_488syp1_dapi_stitched
19.7844	172.798	SUN1	0.446908	male	syp3het	2023_03_24_DLW190het_male11_555sun1S8P_488syp1_dapi_stitched
7.65276	180.451	SUN1	0.4667	male	syp3het	2023_03_24_DLW190het_male11_555sun1S8P_488syp1_dapi_stitched
20.2039	200.655	SUN1	0.518954	male	syp3het	2023_03_24_DLW190het_male11_555sun1S8P_488syp1_dapi_stitched
18.9924	219.647	SUN1	0.568074	male	syp3het	2023_03_24_DLW190het_male11_555sun1S8P_488syp1_dapi_stitched
32.51	252.157	SUN1	0.652154	male	syp3het	2023_03_24_DLW190het_male11_555sun1S8P_488syp1_dapi_stitched
21.0748	273.232	SUN1_stragler	0.70666	male	syp3het	2023_03_24_DLW190het_male11_555sun1S8P_488syp1_dapi_stitched
50.6164	323.848	End	0.83757	male	syp3het	2023_03_24_DLW190het_male11_555sun1S8P_488syp1_dapi_stitched
37.9111	361.759	End	0.93562	male	syp3het	2023_03_24_DLW190het_male11_555sun1S8P_488syp1_dapi_stitched
24.8928	386.652	End	1	male	syp3het	2023_03_24_DLW190het_male11_555sun1S8P_488syp1_dapi_stitched
50.9301	50.9301	None	0.154817	male	syp3het	2023_03_24_DLW190het_male12_555sun1S8P_488syp1_dapi_stitched
16.1006	67.0307	None	0.20376	male	syp3het	2023_03_24_DLW190het_male12_555sun1S8P_488syp1_dapi_stitched
35.7151	102.746	None	0.312326	male	syp3het	2023_03_24_DLW190het_male12_555sun1S8P_488syp1_dapi_stitched
17.9725	120.718	SUN1	0.366959	male	syp3het	2023_03_24_DLW190het_male12_555sun1S8P_488syp1_dapi_stitched
13.84	134.558	SUN1	0.40903	male	syp3het	2023_03_24_DLW190het_male12_555sun1S8P_488syp1_dapi_stitched
11.604	146.162	SUN1	0.444304	male	syp3het	2023_03_24_DLW190het_male12_555sun1S8P_488syp1_dapi_stitched
11.4767	157.639	SUN1	0.479191	male	syp3het	2023_03_24_DLW190het_male12_555sun1S8P_488syp1_dapi_stitched
12.5858	170.225	SUN1	0.517449	male	syp3het	2023_03_24_DLW190het_male12_555sun1S8P_488syp1_dapi_stitched
10.2642	180.489	SUN1	0.54865	male	syp3het	2023_03_24_DLW190het_male12_555sun1S8P_488syp1_dapi_stitched
22.7999	203.289	SUN1	0.617957	male	syp3het	2023_03_24_DLW190het_male12_555sun1S8P_488syp1_dapi_stitched
20.2077	223.497	SUN1_stragler	0.679384	male	syp3het	2023_03_24_DLW190het_male12_555sun1S8P_488syp1_dapi_stitched
44.034	267.531	End	0.813239	male	syp3het	2023_03_24_DLW190het_male12_555sun1S8P_488syp1_dapi_stitched
44.9211	312.452	End	0.94979	male	syp3het	2023_03_24_DLW190het_male12_555sun1S8P_488syp1_dapi_stitched
16.5175	328.969	End	1	male	syp3het	2023_03_24_DLW190het_male12_555sun1S8P_488syp1_dapi_stitched
50.5739	50.5739	None	0.138362	herm	syp2het	2023_03_28_DLW188het_herm4_555sun1S8P_488syp1_dapi_stitched
40.0109	90.5848	None	0.247826	herm	syp2het	2023_03_28_DLW188het_herm4_555sun1S8P_488syp1_dapi_stitched
86.7743	177.359	SUN1	0.485227	herm	syp2het	2023_03_28_DLW188het_herm4_555sun1S8P_488syp1_dapi_stitched
65.9319	243.291	SUN1	0.665606	herm	syp2het	2023_03_28_DLW188het_herm4_555sun1S8P_488syp1_dapi_stitched
48.0055	291.297	SUN1_stragler	0.796942	herm	syp2het	2023_03_28_DLW188het_herm4_555sun1S8P_488syp1_dapi_stitched
74.2213	365.518	End	1	herm	syp2het	2023_03_28_DLW188het_herm4_555sun1S8P_488syp1_dapi_stitched
106.357	106.357	None	0.309297	herm	syp2het	2023_03_28_DLW188het_herm5_555sun1S8P_488syp1_dapi_stitched
46.3791	152.736	SUN1	0.444172	herm	syp2het	2023_03_28_DLW188het_herm5_555sun1S8P_488syp1_dapi_stitched
36.8333	189.569	SUN1	0.551287	herm	syp2het	2023_03_28_DLW188het_herm5_555sun1S8P_488syp1_dapi_stitched
64.269	253.838	SUN1	0.738188	herm	syp2het	2023_03_28_DLW188het_herm5_555sun1S8P_488syp1_dapi_stitched
56.0647	309.903	SUN1_stragler	0.901229	herm	syp2het	2023_03_28_DLW188het_herm5_555sun1S8P_488syp1_dapi_stitched
33.9639	343.867	End	1	herm	syp2het	2023_03_28_DLW188het_herm5_555sun1S8P_488syp1_dapi_stitched
63.8382	63.8382	None	0.162118	herm	syp2het	2023_03_28_DLW188het_herm7_555sun1S8P_488syp1_dapi_stitched
35.3072	99.1455	None	0.251781	herm	syp2het	2023_03_28_DLW188het_herm7_555sun1S8P_488syp1_dapi_stitched
54.4384	153.584	SUN1	0.390028	herm	syp2het	2023_03_28_DLW188het_herm7_555sun1S8P_488syp1_dapi_stitched
73.3383	226.922	SUN1	0.576272	herm	syp2het	2023_03_28_DLW188het_herm7_555sun1S8P_488syp1_dapi_stitched
50.7156	277.638	SUN1	0.705065	herm	syp2het	2023_03_28_DLW188het_herm7_555sun1S8P_488syp1_dapi_stitched
38.3843	316.022	SUN1_stragler	0.802543	herm	syp2het	2023_03_28_DLW188het_herm7_555sun1S8P_488syp1_dapi_stitched
37.7778	353.8	End	0.89848	herm	syp2het	2023_03_28_DLW188het_herm7_555sun1S8P_488syp1_dapi_stitched
39.9761	393.776	End	1	herm	syp2het	2023_03_28_DLW188het_herm7_555sun1S8P_488syp1_dapi_stitched
99.5595	99.5595	None	0.239743	herm	syp2het	2023_03_28_DLW188het_herm8_555sun1S8P_488syp1_dapi_stitched
53.7492	153.309	SUN1	0.369172	herm	syp2het	2023_03_28_DLW188het_herm8_555sun1S8P_488syp1_dapi_stitched
95.5411	248.85	SUN1	0.599239	herm	syp2het	2023_03_28_DLW188het_herm8_555sun1S8P_488syp1_dapi_stitched
62.3701	311.22	SUN1_stragler	0.749428	herm	syp2het	2023_03_28_DLW188het_herm8_555sun1S8P_488syp1_dapi_stitched
104.057	415.277	End	1	herm	syp2het	2023_03_28_DLW188het_herm8_555sun1S8P_488syp1_dapi_stitched
66.4356	66.4356	None	0.189747	herm	syp2het	2023_03_28_DLW188het_herm9_555sun1S8P_488syp1_dapi_stitched
22.0418	88.4775	None	0.252701	herm	syp2het	2023_03_28_DLW188het_herm9_555sun1S8P_488syp1_dapi_stitched
137.588	226.066	SUN1	0.645667	herm	syp2het	2023_03_28_DLW188het_herm9_555sun1S8P_488syp1_dapi_stitched
38.9982	265.064	SUN1	0.75705	herm	syp2het	2023_03_28_DLW188het_herm9_555sun1S8P_488syp1_dapi_stitched
17.648	282.712	SUN1_stragler	0.807455	herm	syp2het	2023_03_28_DLW188het_herm9_555sun1S8P_488syp1_dapi_stitched
67.4153	350.128	End	1	herm	syp2het	2023_03_28_DLW188het_herm9_555sun1S8P_488syp1_dapi_stitched
46.1337	46.1337	None	0.16216	herm	syp2het	2023_03_28_DLW188het_herm10_555sun1S8P_488syp1_dapi_stitched
54.516	100.65	SUN1	0.353784	herm	syp2het	2023_03_28_DLW188het_herm10_555sun1S8P_488syp1_dapi_stitched
42.5784	143.228	SUN1	0.503447	herm	syp2het	2023_03_28_DLW188het_herm10_555sun1S8P_488syp1_dapi_stitched
44.5991	187.827	SUN1	0.660214	herm	syp2het	2023_03_28_DLW188het_herm10_555sun1S8P_488syp1_dapi_stitched
38.9781	226.805	SUN1_stragler	0.797222	herm	syp2het	2023_03_28_DLW188het_herm10_555sun1S8P_488syp1_dapi_stitched
57.6893	284.495	End	1	herm	syp2het	2023_03_28_DLW188het_herm10_555sun1S8P_488syp1_dapi_stitched
57.8727	57.8727	None	0.17953	herm	syp2het	2023_03_28_DLW188het_herm11_555sun1S8P_488syp1_dapi_stitched
37.1131	94.9858	None	0.29466	herm	syp2het	2023_03_28_DLW188het_herm11_555sun1S8P_488syp1_dapi_stitched
137.217	232.203	SUN1	0.720328	herm	syp2het	2023_03_28_DLW188het_herm11_555sun1S8P_488syp1_dapi_stitched
19.7439	251.947	SUN1_stragler	0.781577	herm	syp2het	2023_03_28_DLW188het_herm11_555sun1S8P_488syp1_dapi_stitched
35.2905	287.237	End	0.891053	herm	syp2het	2023_03_28_DLW188het_herm11_555sun1S8P_488syp1_dapi_stitched
35.1197	322.357	End	1	herm	syp2het	2023_03_28_DLW188het_herm11_555sun1S8P_488syp1_dapi_stitched
89.719	89.719	None	0.298679	herm	syp2het	2023_03_28_DLW188het_herm12_555sun1S8P_488syp1_dapi_stitched
88.4624	178.181	SUN1	0.593175	herm	syp2het	2023_03_28_DLW188het_herm12_555sun1S8P_488syp1_dapi_stitched
45.5371	223.719	SUN1	0.74477	herm	syp2het	2023_03_28_DLW188het_herm12_555sun1S8P_488syp1_dapi_stitched
14.8057	238.524	SUN1_stragler	0.794059	herm	syp2het	2023_03_28_DLW188het_herm12_555sun1S8P_488syp1_dapi_stitched
61.8618	300.386	End	1	herm	syp2het	2023_03_28_DLW188het_herm12_555sun1S8P_488syp1_dapi_stitched
47.1582	47.1582	None	0.121361	male	syp2het	2023_03_28_DLW188het_male11_555sun1S8P_488syp1_dapi_stitched
16.3941	63.5523	None	0.163552	male	syp2het	2023_03_28_DLW188het_male11_555sun1S8P_488syp1_dapi_stitched
37.293	100.845	SUN1	0.259525	male	syp2het	2023_03_28_DLW188het_male11_555sun1S8P_488syp1_dapi_stitched
48.3582	149.203	SUN1	0.383975	male	syp2het	2023_03_28_DLW188het_male11_555sun1S8P_488syp1_dapi_stitched
30.7155	179.919	SUN1	0.463021	male	syp2het	2023_03_28_DLW188het_male11_555sun1S8P_488syp1_dapi_stitched
10.9988	190.918	SUN1	0.491327	male	syp2het	2023_03_28_DLW188het_male11_555sun1S8P_488syp1_dapi_stitched
14.5601	205.478	SUN1	0.528797	male	syp2het	2023_03_28_DLW188het_male11_555sun1S8P_488syp1_dapi_stitched
14.809	220.287	SUN1_stragler	0.566908	male	syp2het	2023_03_28_DLW188het_male11_555sun1S8P_488syp1_dapi_stitched
50.7658	271.053	End	0.697553	male	syp2het	2023_03_28_DLW188het_male11_555sun1S8P_488syp1_dapi_stitched
68.3961	339.449	End	0.873571	male	syp2het	2023_03_28_DLW188het_male11_555sun1S8P_488syp1_dapi_stitched
32.5373	371.986	End	0.957305	male	syp2het	2023_03_28_DLW188het_male11_555sun1S8P_488syp1_dapi_stitched
16.5902	388.576	End	1	male	syp2het	2023_03_28_DLW188het_male11_555sun1S8P_488syp1_dapi_stitched
37.9647	37.9647	None	0.110351	male	syp2het	2023_03_28_DLW188het_male12_555sun1S8P_488syp1_dapi_stitched
39.2051	77.1698	None	0.224308	male	syp2het	2023_03_28_DLW188het_male12_555sun1S8P_488syp1_dapi_stitched
32.5069	109.677	None	0.318795	male	syp2het	2023_03_28_DLW188het_male12_555sun1S8P_488syp1_dapi_stitched
26.2375	135.914	SUN1	0.395059	male	syp2het	2023_03_28_DLW188het_male12_555sun1S8P_488syp1_dapi_stitched
23.1119	159.026	SUN1	0.462238	male	syp2het	2023_03_28_DLW188het_male12_555sun1S8P_488syp1_dapi_stitched
17.168	176.194	SUN1	0.51214	male	syp2het	2023_03_28_DLW188het_male12_555sun1S8P_488syp1_dapi_stitched
30.7823	206.976	SUN1	0.601614	male	syp2het	2023_03_28_DLW188het_male12_555sun1S8P_488syp1_dapi_stitched
21.8938	228.87	SUN1	0.665252	male	syp2het	2023_03_28_DLW188het_male12_555sun1S8P_488syp1_dapi_stitched
7.55116	236.421	SUN1	0.687201	male	syp2het	2023_03_28_DLW188het_male12_555sun1S8P_488syp1_dapi_stitched
16.301	252.722	SUN1	0.734583	male	syp2het	2023_03_28_DLW188het_male12_555sun1S8P_488syp1_dapi_stitched
30.4829	283.205	SUN1	0.823187	male	syp2het	2023_03_28_DLW188het_male12_555sun1S8P_488syp1_dapi_stitched
21.5381	304.743	SUN1_stragler	0.885791	male	syp2het	2023_03_28_DLW188het_male12_555sun1S8P_488syp1_dapi_stitched
39.2919	344.035	End	1	male	syp2het	2023_03_28_DLW188het_male12_555sun1S8P_488syp1_dapi_stitched
79.2283	79.2283	None	0.158442	male	syp2het	2023_03_28_DLW188het_male13_555sun1S8P_488syp1_dapi_stitched
30.3878	109.616	None	0.219211	male	syp2het	2023_03_28_DLW188het_male13_555sun1S8P_488syp1_dapi_stitched
18.3715	127.988	None	0.255951	male	syp2het	2023_03_28_DLW188het_male13_555sun1S8P_488syp1_dapi_stitched
19.1184	147.106	None	0.294184	male	syp2het	2023_03_28_DLW188het_male13_555sun1S8P_488syp1_dapi_stitched
36.5483	183.654	SUN1	0.367274	male	syp2het	2023_03_28_DLW188het_male13_555sun1S8P_488syp1_dapi_stitched
31.424	215.078	SUN1	0.430116	male	syp2het	2023_03_28_DLW188het_male13_555sun1S8P_488syp1_dapi_stitched
29.0229	244.101	SUN1	0.488156	male	syp2het	2023_03_28_DLW188het_male13_555sun1S8P_488syp1_dapi_stitched
15.659	259.76	SUN1	0.519471	male	syp2het	2023_03_28_DLW188het_male13_555sun1S8P_488syp1_dapi_stitched
18.3558	278.116	SUN1	0.556179	male	syp2het	2023_03_28_DLW188het_male13_555sun1S8P_488syp1_dapi_stitched
27.0042	305.12	SUN1	0.610182	male	syp2het	2023_03_28_DLW188het_male13_555sun1S8P_488syp1_dapi_stitched
21.0395	326.16	SUN1	0.652257	male	syp2het	2023_03_28_DLW188het_male13_555sun1S8P_488syp1_dapi_stitched
16.7031	342.863	SUN1	0.68566	male	syp2het	2023_03_28_DLW188het_male13_555sun1S8P_488syp1_dapi_stitched
17.8198	360.682	SUN1_stragler	0.721297	male	syp2het	2023_03_28_DLW188het_male13_555sun1S8P_488syp1_dapi_stitched
26.1956	386.878	End	0.773683	male	syp2het	2023_03_28_DLW188het_male13_555sun1S8P_488syp1_dapi_stitched
28.5182	415.396	End	0.830714	male	syp2het	2023_03_28_DLW188het_male13_555sun1S8P_488syp1_dapi_stitched
37.6841	453.08	End	0.906075	male	syp2het	2023_03_28_DLW188het_male13_555sun1S8P_488syp1_dapi_stitched
21.1615	474.242	End	0.948394	male	syp2het	2023_03_28_DLW188het_male13_555sun1S8P_488syp1_dapi_stitched
25.8054	500.047	End	1	male	syp2het	2023_03_28_DLW188het_male13_555sun1S8P_488syp1_dapi_stitched
88.6157	88.6157	None	0.263274	herm	WT	2023_03_28_N2_herm1_555sun1S8P_488syp1_dapi_stitched
78.3354	166.951	SUN1	0.496006	herm	WT	2023_03_28_N2_herm1_555sun1S8P_488syp1_dapi_stitched
101.999	268.95	SUN1	0.799042	herm	WT	2023_03_28_N2_herm1_555sun1S8P_488syp1_dapi_stitched
22.141	291.091	SUN1_stragler	0.864822	herm	WT	2023_03_28_N2_herm1_555sun1S8P_488syp1_dapi_stitched
45.4997	336.591	End	1	herm	WT	2023_03_28_N2_herm1_555sun1S8P_488syp1_dapi_stitched
50.5692	50.5692	None	0.159189	herm	WT	2023_03_28_N2_herm2_555sun1S8P_488syp1_dapi_stitched
33.4009	83.9701	None	0.264334	herm	WT	2023_03_28_N2_herm2_555sun1S8P_488syp1_dapi_stitched
58.2805	142.251	SUN1	0.447798	herm	WT	2023_03_28_N2_herm2_555sun1S8P_488syp1_dapi_stitched
80.2339	222.485	SUN1	0.700371	herm	WT	2023_03_28_N2_herm2_555sun1S8P_488syp1_dapi_stitched
23.069	245.554	SUN1_stragler	0.772991	herm	WT	2023_03_28_N2_herm2_555sun1S8P_488syp1_dapi_stitched
72.1132	317.667	End	1	herm	WT	2023_03_28_N2_herm2_555sun1S8P_488syp1_dapi_stitched
58.9416	58.9416	None	0.160328	herm	WT	2023_03_28_N2_herm3_555sun1S8P_488syp1_dapi_stitched
22.2465	81.188	None	0.220841	herm	WT	2023_03_28_N2_herm3_555sun1S8P_488syp1_dapi_stitched
60.1995	141.388	SUN1	0.38459	herm	WT	2023_03_28_N2_herm3_555sun1S8P_488syp1_dapi_stitched
34.2769	175.664	SUN1	0.477827	herm	WT	2023_03_28_N2_herm3_555sun1S8P_488syp1_dapi_stitched
70.9316	246.596	SUN1	0.670768	herm	WT	2023_03_28_N2_herm3_555sun1S8P_488syp1_dapi_stitched
28.7339	275.33	SUN1_stragler	0.748928	herm	WT	2023_03_28_N2_herm3_555sun1S8P_488syp1_dapi_stitched
35.7328	311.063	SUN1_stragler	0.846125	herm	WT	2023_03_28_N2_herm3_555sun1S8P_488syp1_dapi_stitched
42.8755	353.938	End	0.962751	herm	WT	2023_03_28_N2_herm3_555sun1S8P_488syp1_dapi_stitched
13.6938	367.632	End	1	herm	WT	2023_03_28_N2_herm3_555sun1S8P_488syp1_dapi_stitched
78.6619	78.6619	None	0.208467	male	WT	2023_03_28_N2_male1_555sun1S8P_488syp1_dapi_stitched
28.3224	106.984	None	0.283526	male	WT	2023_03_28_N2_male1_555sun1S8P_488syp1_dapi_stitched
43.0103	149.995	SUN1	0.397511	male	WT	2023_03_28_N2_male1_555sun1S8P_488syp1_dapi_stitched
45.3181	195.313	SUN1	0.517611	male	WT	2023_03_28_N2_male1_555sun1S8P_488syp1_dapi_stitched
31.3278	226.64	SUN1	0.600635	male	WT	2023_03_28_N2_male1_555sun1S8P_488syp1_dapi_stitched
31.279	257.919	SUN1	0.68353	male	WT	2023_03_28_N2_male1_555sun1S8P_488syp1_dapi_stitched
17.5632	275.483	SUN1_stragler	0.730075	male	WT	2023_03_28_N2_male1_555sun1S8P_488syp1_dapi_stitched
64.3107	339.793	End	0.900509	male	WT	2023_03_28_N2_male1_555sun1S8P_488syp1_dapi_stitched
30.0729	369.866	End	0.980208	male	WT	2023_03_28_N2_male1_555sun1S8P_488syp1_dapi_stitched
7.46832	377.335	End	1	male	WT	2023_03_28_N2_male1_555sun1S8P_488syp1_dapi_stitched
50.8683	50.8683	None	0.156094	herm	WT	2023_03_30_N2_herm5_555sun1S8P_488syp1_dapi_stitched
19.3736	70.2419	None	0.215544	herm	WT	2023_03_30_N2_herm5_555sun1S8P_488syp1_dapi_stitched
17.7997	88.0416	None	0.270164	herm	WT	2023_03_30_N2_herm5_555sun1S8P_488syp1_dapi_stitched
57.2951	145.337	SUN1	0.445979	herm	WT	2023_03_30_N2_herm5_555sun1S8P_488syp1_dapi_stitched
42.5513	187.888	SUN1	0.576552	herm	WT	2023_03_30_N2_herm5_555sun1S8P_488syp1_dapi_stitched
43.1752	231.063	SUN1	0.709039	herm	WT	2023_03_30_N2_herm5_555sun1S8P_488syp1_dapi_stitched
22.2963	253.36	SUN1_stragler	0.777458	herm	WT	2023_03_30_N2_herm5_555sun1S8P_488syp1_dapi_stitched
28.8895	282.249	End	0.866108	herm	WT	2023_03_30_N2_herm5_555sun1S8P_488syp1_dapi_stitched
43.633	325.882	End	1	herm	WT	2023_03_30_N2_herm5_555sun1S8P_488syp1_dapi_stitched
47.5267	47.5267	None	0.132455	herm	WT	2023_03_30_N2_herm6_555sun1S8P_488syp1_dapi_stitched
49.5112	97.0379	None	0.270441	herm	WT	2023_03_30_N2_herm6_555sun1S8P_488syp1_dapi_stitched
62.9396	159.978	SUN1	0.445851	herm	WT	2023_03_30_N2_herm6_555sun1S8P_488syp1_dapi_stitched
50.8984	210.876	SUN1	0.587702	herm	WT	2023_03_30_N2_herm6_555sun1S8P_488syp1_dapi_stitched
43.389	254.265	SUN1	0.708626	herm	WT	2023_03_30_N2_herm6_555sun1S8P_488syp1_dapi_stitched
28.4638	282.729	SUN1_stragler	0.787953	herm	WT	2023_03_30_N2_herm6_555sun1S8P_488syp1_dapi_stitched
76.0855	358.814	End	1	herm	WT	2023_03_30_N2_herm6_555sun1S8P_488syp1_dapi_stitched
76.655	76.655	None	0.225481	herm	WT	2023_03_30_N2_herm7_555sun1S8P_488syp1_dapi_stitched
41.1449	117.8	SUN1	0.346508	herm	WT	2023_03_30_N2_herm7_555sun1S8P_488syp1_dapi_stitched
42.973	160.773	SUN1	0.472914	herm	WT	2023_03_30_N2_herm7_555sun1S8P_488syp1_dapi_stitched
64.2869	225.06	SUN1	0.662014	herm	WT	2023_03_30_N2_herm7_555sun1S8P_488syp1_dapi_stitched
33.9479	259.008	SUN1	0.761871	herm	WT	2023_03_30_N2_herm7_555sun1S8P_488syp1_dapi_stitched
16.6999	275.708	SUN1	0.810994	herm	WT	2023_03_30_N2_herm7_555sun1S8P_488syp1_dapi_stitched
11.7681	287.476	SUN1_stragler	0.84561	herm	WT	2023_03_30_N2_herm7_555sun1S8P_488syp1_dapi_stitched
23.0505	310.526	SUN1_stragler	0.913413	herm	WT	2023_03_30_N2_herm7_555sun1S8P_488syp1_dapi_stitched
18.7257	329.252	End	0.968495	herm	WT	2023_03_30_N2_herm7_555sun1S8P_488syp1_dapi_stitched
10.7106	339.962	End	1	herm	WT	2023_03_30_N2_herm7_555sun1S8P_488syp1_dapi_stitched
33.3343	33.3343	None	0.0876104	male	WT	2023_03_30_N2_male2_555sun1S8P_488syp1_dapi_stitched
36.1579	69.4921	None	0.182642	male	WT	2023_03_30_N2_male2_555sun1S8P_488syp1_dapi_stitched
15.4709	84.963	None	0.223303	male	WT	2023_03_30_N2_male2_555sun1S8P_488syp1_dapi_stitched
13.4225	98.3856	None	0.258581	male	WT	2023_03_30_N2_male2_555sun1S8P_488syp1_dapi_stitched
10.6742	109.06	None	0.286635	male	WT	2023_03_30_N2_male2_555sun1S8P_488syp1_dapi_stitched
40.5255	149.585	SUN1	0.393146	male	WT	2023_03_30_N2_male2_555sun1S8P_488syp1_dapi_stitched
32.9367	182.522	SUN1	0.479712	male	WT	2023_03_30_N2_male2_555sun1S8P_488syp1_dapi_stitched
17.6071	200.129	SUN1	0.525987	male	WT	2023_03_30_N2_male2_555sun1S8P_488syp1_dapi_stitched
37.409	237.538	SUN1	0.624307	male	WT	2023_03_30_N2_male2_555sun1S8P_488syp1_dapi_stitched
11.2921	248.83	SUN1_stragler	0.653985	male	WT	2023_03_30_N2_male2_555sun1S8P_488syp1_dapi_stitched
68.2681	317.098	End	0.83341	male	WT	2023_03_30_N2_male2_555sun1S8P_488syp1_dapi_stitched
33.8376	350.936	End	0.922344	male	WT	2023_03_30_N2_male2_555sun1S8P_488syp1_dapi_stitched
29.5469	380.483	End	1	male	WT	2023_03_30_N2_male2_555sun1S8P_488syp1_dapi_stitched
45.4131	45.4131	None	0.100775	male	WT	2023_03_30_N2_male3_555sun1S8P_488syp1_dapi_stitched
39.6376	85.0507	None	0.188734	male	WT	2023_03_30_N2_male3_555sun1S8P_488syp1_dapi_stitched
29.3846	114.435	None	0.253941	male	WT	2023_03_30_N2_male3_555sun1S8P_488syp1_dapi_stitched
19.195	133.63	None	0.296537	male	WT	2023_03_30_N2_male3_555sun1S8P_488syp1_dapi_stitched
12.4506	146.081	None	0.324166	male	WT	2023_03_30_N2_male3_555sun1S8P_488syp1_dapi_stitched
18.9552	165.036	SUN1	0.366229	male	WT	2023_03_30_N2_male3_555sun1S8P_488syp1_dapi_stitched
19.3951	184.431	SUN1	0.409268	male	WT	2023_03_30_N2_male3_555sun1S8P_488syp1_dapi_stitched
14.6906	199.122	SUN1	0.441868	male	WT	2023_03_30_N2_male3_555sun1S8P_488syp1_dapi_stitched
16.8144	215.936	SUN1	0.47918	male	WT	2023_03_30_N2_male3_555sun1S8P_488syp1_dapi_stitched
18.9209	234.857	SUN1	0.521167	male	WT	2023_03_30_N2_male3_555sun1S8P_488syp1_dapi_stitched
31.3981	266.255	SUN1	0.590842	male	WT	2023_03_30_N2_male3_555sun1S8P_488syp1_dapi_stitched
25.3766	291.632	SUN1	0.647155	male	WT	2023_03_30_N2_male3_555sun1S8P_488syp1_dapi_stitched
14.3201	305.952	SUN1_stragler	0.678932	male	WT	2023_03_30_N2_male3_555sun1S8P_488syp1_dapi_stitched
45.0963	351.048	End	0.779005	male	WT	2023_03_30_N2_male3_555sun1S8P_488syp1_dapi_stitched
40.9624	392.011	End	0.869904	male	WT	2023_03_30_N2_male3_555sun1S8P_488syp1_dapi_stitched
30.6857	422.696	End	0.937998	male	WT	2023_03_30_N2_male3_555sun1S8P_488syp1_dapi_stitched
9.7624	432.459	End	0.959661	male	WT	2023_03_30_N2_male3_555sun1S8P_488syp1_dapi_stitched
7.9677	440.426	End	0.977342	male	WT	2023_03_30_N2_male3_555sun1S8P_488syp1_dapi_stitched
10.2103	450.637	End	1	male	WT	2023_03_30_N2_male3_555sun1S8P_488syp1_dapi_stitched
48.0914	48.0914	None	0.137478	male	WT	2023_03_30_N2_male4_555sun1S8P_488syp1_dapi_stitched
8.91925	57.0107	None	0.162975	male	WT	2023_03_30_N2_male4_555sun1S8P_488syp1_dapi_stitched
20.3672	77.3779	None	0.221199	male	WT	2023_03_30_N2_male4_555sun1S8P_488syp1_dapi_stitched
13.8436	91.2216	None	0.260773	male	WT	2023_03_30_N2_male4_555sun1S8P_488syp1_dapi_stitched
13.7919	105.014	None	0.3002	male	WT	2023_03_30_N2_male4_555sun1S8P_488syp1_dapi_stitched
23.8319	128.845	SUN1	0.368327	male	WT	2023_03_30_N2_male4_555sun1S8P_488syp1_dapi_stitched
22.7644	151.61	SUN1	0.433403	male	WT	2023_03_30_N2_male4_555sun1S8P_488syp1_dapi_stitched
28.5682	180.178	SUN1	0.515071	male	WT	2023_03_30_N2_male4_555sun1S8P_488syp1_dapi_stitched
17.6081	197.786	SUN1	0.565407	male	WT	2023_03_30_N2_male4_555sun1S8P_488syp1_dapi_stitched
10.8239	208.61	SUN1	0.596349	male	WT	2023_03_30_N2_male4_555sun1S8P_488syp1_dapi_stitched
11.0627	219.673	SUN1	0.627973	male	WT	2023_03_30_N2_male4_555sun1S8P_488syp1_dapi_stitched
14.6107	234.283	SUN1	0.669741	male	WT	2023_03_30_N2_male4_555sun1S8P_488syp1_dapi_stitched
19.1355	253.419	SUN1_stragler	0.724443	male	WT	2023_03_30_N2_male4_555sun1S8P_488syp1_dapi_stitched
18.4783	271.897	End	0.777267	male	WT	2023_03_30_N2_male4_555sun1S8P_488syp1_dapi_stitched
23.4253	295.323	End	0.844232	male	WT	2023_03_30_N2_male4_555sun1S8P_488syp1_dapi_stitched
30.327	325.65	End	0.930927	male	WT	2023_03_30_N2_male4_555sun1S8P_488syp1_dapi_stitched
24.1626	349.812	End	1	male	WT	2023_03_30_N2_male4_555sun1S8P_488syp1_dapi_stitched
45.4096	45.4096	None	0.102748	male	WT	2023_03_30_N2_male5_555sun1S8P_488syp1_dapi_stitched
37.5391	82.9487	None	0.187687	male	WT	2023_03_30_N2_male5_555sun1S8P_488syp1_dapi_stitched
31.9205	114.869	None	0.259914	male	WT	2023_03_30_N2_male5_555sun1S8P_488syp1_dapi_stitched
22.5322	137.401	None	0.310897	male	WT	2023_03_30_N2_male5_555sun1S8P_488syp1_dapi_stitched
19.3414	156.743	SUN1	0.354661	male	WT	2023_03_30_N2_male5_555sun1S8P_488syp1_dapi_stitched
19.4693	176.212	SUN1	0.398714	male	WT	2023_03_30_N2_male5_555sun1S8P_488syp1_dapi_stitched
20.9695	197.182	SUN1	0.446162	male	WT	2023_03_30_N2_male5_555sun1S8P_488syp1_dapi_stitched
28.5865	225.768	SUN1	0.510844	male	WT	2023_03_30_N2_male5_555sun1S8P_488syp1_dapi_stitched
22.3091	248.077	SUN1	0.561323	male	WT	2023_03_30_N2_male5_555sun1S8P_488syp1_dapi_stitched
33.1773	281.255	SUN1	0.636393	male	WT	2023_03_30_N2_male5_555sun1S8P_488syp1_dapi_stitched
23.7295	304.984	SUN1	0.690086	male	WT	2023_03_30_N2_male5_555sun1S8P_488syp1_dapi_stitched
12.7128	317.697	SUN1_stragler	0.718851	male	WT	2023_03_30_N2_male5_555sun1S8P_488syp1_dapi_stitched
46.9625	364.659	End	0.825113	male	WT	2023_03_30_N2_male5_555sun1S8P_488syp1_dapi_stitched
38.9505	403.61	End	0.913246	male	WT	2023_03_30_N2_male5_555sun1S8P_488syp1_dapi_stitched
28.3516	431.962	End	0.977397	male	WT	2023_03_30_N2_male5_555sun1S8P_488syp1_dapi_stitched
9.98957	441.951	End	1	male	WT	2023_03_30_N2_male5_555sun1S8P_488syp1_dapi_stitched
39.5003	39.5003	None	0.129223	herm	WT	2023_03_31_N2_herm9_555sun1S8P_488syp1_dapi_stitched
29.5473	69.0476	None	0.225886	herm	WT	2023_03_31_N2_herm9_555sun1S8P_488syp1_dapi_stitched
51.155	120.203	SUN1	0.393237	herm	WT	2023_03_31_N2_herm9_555sun1S8P_488syp1_dapi_stitched
39.3179	159.521	SUN1	0.521863	herm	WT	2023_03_31_N2_herm9_555sun1S8P_488syp1_dapi_stitched
62.3369	221.857	SUN1	0.725795	herm	WT	2023_03_31_N2_herm9_555sun1S8P_488syp1_dapi_stitched
49.2099	271.067	SUN1_stragler	0.886782	herm	WT	2023_03_31_N2_herm9_555sun1S8P_488syp1_dapi_stitched
21.9743	293.042	End	0.95867	herm	WT	2023_03_31_N2_herm9_555sun1S8P_488syp1_dapi_stitched
12.6336	305.675	End	1	herm	WT	2023_03_31_N2_herm9_555sun1S8P_488syp1_dapi_stitched
42.427	42.427	None	0.120039	herm	WT	2023_03_31_N2_herm10_555sun1S8P_488syp1_dapi_stitched
18.7144	61.1415	None	0.172988	herm	WT	2023_03_31_N2_herm10_555sun1S8P_488syp1_dapi_stitched
26.2293	87.3707	None	0.247198	herm	WT	2023_03_31_N2_herm10_555sun1S8P_488syp1_dapi_stitched
66.7194	154.09	SUN1	0.435968	herm	WT	2023_03_31_N2_herm10_555sun1S8P_488syp1_dapi_stitched
69.066	223.156	SUN1	0.631377	herm	WT	2023_03_31_N2_herm10_555sun1S8P_488syp1_dapi_stitched
30.168	253.324	SUN1	0.716731	herm	WT	2023_03_31_N2_herm10_555sun1S8P_488syp1_dapi_stitched
26.3771	279.701	SUN1_stragler	0.79136	herm	WT	2023_03_31_N2_herm10_555sun1S8P_488syp1_dapi_stitched
14.3477	294.049	SUN1_stragler	0.831954	herm	WT	2023_03_31_N2_herm10_555sun1S8P_488syp1_dapi_stitched
59.3947	353.444	End	1	herm	WT	2023_03_31_N2_herm10_555sun1S8P_488syp1_dapi_stitched
38.5289	38.5289	None	0.117468	herm	WT	2023_03_31_N2_herm11_555sun1S8P_488syp1_dapi_stitched
40.7421	79.271	None	0.241683	herm	WT	2023_03_31_N2_herm11_555sun1S8P_488syp1_dapi_stitched
52.0186	131.29	SUN1	0.400278	herm	WT	2023_03_31_N2_herm11_555sun1S8P_488syp1_dapi_stitched
41.984	173.274	SUN1	0.528279	herm	WT	2023_03_31_N2_herm11_555sun1S8P_488syp1_dapi_stitched
58.7849	232.058	SUN1	0.707504	herm	WT	2023_03_31_N2_herm11_555sun1S8P_488syp1_dapi_stitched
22.7804	254.839	SUN1	0.776957	herm	WT	2023_03_31_N2_herm11_555sun1S8P_488syp1_dapi_stitched
24.1292	278.968	SUN1_stragler	0.850522	herm	WT	2023_03_31_N2_herm11_555sun1S8P_488syp1_dapi_stitched
31.4291	310.397	End	0.946344	herm	WT	2023_03_31_N2_herm11_555sun1S8P_488syp1_dapi_stitched
12.7679	323.165	End	0.985271	herm	WT	2023_03_31_N2_herm11_555sun1S8P_488syp1_dapi_stitched
4.83118	327.996	End	1	herm	WT	2023_03_31_N2_herm11_555sun1S8P_488syp1_dapi_stitched
82.7674	82.7674	None	0.210532	male	WT	2023_03_31_N2_male6_555sun1S8P_488syp1_dapi_stitched
28.4233	111.191	None	0.282832	male	WT	2023_03_31_N2_male6_555sun1S8P_488syp1_dapi_stitched
24.6125	135.803	None	0.345438	male	WT	2023_03_31_N2_male6_555sun1S8P_488syp1_dapi_stitched
32.213	168.016	SUN1	0.427376	male	WT	2023_03_31_N2_male6_555sun1S8P_488syp1_dapi_stitched
20.9177	188.934	SUN1	0.480584	male	WT	2023_03_31_N2_male6_555sun1S8P_488syp1_dapi_stitched
7.20795	196.142	SUN1	0.498919	male	WT	2023_03_31_N2_male6_555sun1S8P_488syp1_dapi_stitched
11.3404	207.482	SUN1	0.527765	male	WT	2023_03_31_N2_male6_555sun1S8P_488syp1_dapi_stitched
21.0738	228.556	SUN1	0.581369	male	WT	2023_03_31_N2_male6_555sun1S8P_488syp1_dapi_stitched
24.0015	252.558	SUN1	0.642421	male	WT	2023_03_31_N2_male6_555sun1S8P_488syp1_dapi_stitched
24.538	277.096	SUN1	0.704838	male	WT	2023_03_31_N2_male6_555sun1S8P_488syp1_dapi_stitched
11.9368	289.032	SUN1	0.735201	male	WT	2023_03_31_N2_male6_555sun1S8P_488syp1_dapi_stitched
15.8214	304.854	SUN1_stragler	0.775445	male	WT	2023_03_31_N2_male6_555sun1S8P_488syp1_dapi_stitched
16.9816	321.835	End	0.818641	male	WT	2023_03_31_N2_male6_555sun1S8P_488syp1_dapi_stitched
25.2519	347.087	End	0.882873	male	WT	2023_03_31_N2_male6_555sun1S8P_488syp1_dapi_stitched
17.3173	364.405	End	0.926922	male	WT	2023_03_31_N2_male6_555sun1S8P_488syp1_dapi_stitched
28.7293	393.134	End	1	male	WT	2023_03_31_N2_male6_555sun1S8P_488syp1_dapi_stitched
44.61	44.61	None	0.137104	male	WT	2023_03_31_N2_male7_555sun1S8P_488syp1_dapi_stitched
40.4881	85.0981	None	0.26154	male	WT	2023_03_31_N2_male7_555sun1S8P_488syp1_dapi_stitched
25.6983	110.796	None	0.340521	male	WT	2023_03_31_N2_male7_555sun1S8P_488syp1_dapi_stitched
26.2069	137.003	SUN1	0.421065	male	WT	2023_03_31_N2_male7_555sun1S8P_488syp1_dapi_stitched
25.4029	162.406	SUN1	0.499138	male	WT	2023_03_31_N2_male7_555sun1S8P_488syp1_dapi_stitched
11.0922	173.498	SUN1	0.533228	male	WT	2023_03_31_N2_male7_555sun1S8P_488syp1_dapi_stitched
12.9725	186.471	SUN1	0.573098	male	WT	2023_03_31_N2_male7_555sun1S8P_488syp1_dapi_stitched
24.0819	210.553	SUN1	0.647111	male	WT	2023_03_31_N2_male7_555sun1S8P_488syp1_dapi_stitched
20.1029	230.656	SUN1	0.708895	male	WT	2023_03_31_N2_male7_555sun1S8P_488syp1_dapi_stitched
9.97658	240.632	SUN1_stragler	0.739557	male	WT	2023_03_31_N2_male7_555sun1S8P_488syp1_dapi_stitched
35.028	275.66	End	0.847211	male	WT	2023_03_31_N2_male7_555sun1S8P_488syp1_dapi_stitched
49.7134	325.374	End	1	male	WT	2023_03_31_N2_male7_555sun1S8P_488syp1_dapi_stitched
55.7606	55.7606	None	0.172209	male	WT	2023_03_31_N2_male8_555sun1S8P_488syp1_dapi_stitched
47.371	103.132	None	0.318508	male	WT	2023_03_31_N2_male8_555sun1S8P_488syp1_dapi_stitched
51.7406	154.872	SUN1	0.478302	male	WT	2023_03_31_N2_male8_555sun1S8P_488syp1_dapi_stitched
33.0683	187.94	SUN1	0.580428	male	WT	2023_03_31_N2_male8_555sun1S8P_488syp1_dapi_stitched
47.702	235.642	SUN1	0.72775	male	WT	2023_03_31_N2_male8_555sun1S8P_488syp1_dapi_stitched
10.807	246.449	SUN1_stragler	0.761125	male	WT	2023_03_31_N2_male8_555sun1S8P_488syp1_dapi_stitched
44.5957	291.045	End	0.898853	male	WT	2023_03_31_N2_male8_555sun1S8P_488syp1_dapi_stitched
16.8223	307.868	End	0.950807	male	WT	2023_03_31_N2_male8_555sun1S8P_488syp1_dapi_stitched
15.9286	323.796	End	1	male	WT	2023_03_31_N2_male8_555sun1S8P_488syp1_dapi_stitched
